# Supplementary material
Source: publisher site journal article supplement (https://www.dovepress.com/article/391595)
Supplement: Supplementary file 1 [file get_supplementary_file.php]

supplemental Table 1

| Compounds                   | Q1 (Da)  | molecular weight (Da) | Ionization model | Formula    |
|-----------------------------|----------|-----------------------|------------------|------------|
| (±)12-HEPE                  | 3.17E+02 | 3.18E+02              | [M-H]-           | C20H30O3   |
| (±)12-HETE                  | 3.19E+02 | 3.20E+02              | [M-H]-           | C20H32O3   |
| (±)15-HETE                  | 3.19E+02 | 3.20E+02              | [M-H]-           | C20H32O3   |
| (±)5-HETE                   | 3.19E+02 | 3.20E+02              | [M-H]-           | C20H32O3   |
| 11(S)-HETE                  | 3.19E+02 | 3.20E+02              | [M-H]-           | C20H32O3   |
| 12,13-EpOME                 | 2.95E+02 | 2.96E+02              | [M-H]-           | C18H32O3   |
| 12-Oxochenodeoxycholic acid | 4.05E+02 | 4.06E+02              | [M-H]-           | C24H38O3   |
| 14(S)-HDHA                  | 3.43E+02 | 3.44E+02              | [M-H]-           | C22H32O3   |
| 3-oxodeoxycholic acid       | 3.89E+02 | 3.90E+02              | [M-H]-           | C24H38O3   |
| 6,7-diketolithocholic acid  | 4.03E+02 | 4.04E+02              | [M-H]-           | C24H38O3   |
| 9,10-DiHOME                 | 3.13E+02 | 3.14E+02              | [M-H]-           | C18H34O4   |
| 9,10-EpOME                  | 2.95E+02 | 2.96E+02              | [M-H]-           | C18H32O3   |
| BMP(16:1_22:6)              | 8.11E+02 | 7.92E+02              | [M+NH4]+         | C44H73O10P |
| BMP(18:1_20:4)              | 8.15E+02 | 7.97E+02              | [M+NH4]+         | C44H77O10P |
| BMP(18:1_22:4)              | 8.43E+02 | 8.25E+02              | [M+NH4]+         | C46H81O10P |
| BMP(18:1_22:6)              | 8.39E+02 | 8.21E+02              | [M+NH4]+         | C46H77O10P |
| BMP(18:2_20:4)              | 8.13E+02 | 7.95E+02              | [M+NH4]+         | C44H75O10P |
| BMP(18:2_20:5)              | 8.11E+02 | 7.92E+02              | [M+NH4]+         | C44H73O10P |
| BMP(18:2_22:5)              | 8.39E+02 | 8.21E+02              | [M+NH4]+         | C46H77O10P |
| BMP(18:2_22:6)              | 8.37E+02 | 8.19E+02              | [M+NH4]+         | C46H75O10P |
| BMP(18:3_22:6)              | 8.35E+02 | 8.16E+02              | [M+NH4]+         | C46H73O10P |
| BMP(20:4_20:4)              | 8.37E+02 | 8.19E+02              | [M+NH4]+         | C46H75O10P |
| BMP(20:4_22:6)              | 8.61E+02 | 8.43E+02              | [M+NH4]+         | C48H75O10P |
| BMP(20:5_22:6)              | 8.59E+02 | 8.40E+02              | [M+NH4]+         | C48H73O10P |
| BMP(22:5_22:6)              | 8.87E+02 | 8.69E+02              | [M+NH4]+         | C50H77O10P |
| BMP(22:6_22:6)              | 8.85E+02 | 8.67E+02              | [M+NH4]+         | C50H75O10P |
| CE(16:0)                    | 6.43E+02 | 6.25E+02              | [M+NH4]+         | C43H76O2   |
| CE(16:1)                    | 6.41E+02 | 6.23E+02              | [M+NH4]+         | C43H74O2   |
| CE(17:1)                    | 6.55E+02 | 6.37E+02              | [M+NH4]+         | C44H76O2   |
| CE(18:0)                    | 6.71E+02 | 6.53E+02              | [M+NH4]+         | C45H80O2   |
| CE(18:1)                    | 6.69E+02 | 6.51E+02              | [M+NH4]+         | C45H78O2   |
| CE(18:2)                    | 6.67E+02 | 6.49E+02              | [M+NH4]+         | C45H76O2   |
| CE(18:3)                    | 6.65E+02 | 6.47E+02              | [M+NH4]+         | C45H74O2   |
| CE(20:1)                    | 6.97E+02 | 6.79E+02              | [M+NH4]+         | C47H82O2   |
| CE(20:2)                    | 6.95E+02 | 6.77E+02              | [M+NH4]+         | C47H80O2   |
| CE(20:3)                    | 6.93E+02 | 6.75E+02              | [M+NH4]+         | C47H78O2   |
| CE(20:4)                    | 6.91E+02 | 6.73E+02              | [M+NH4]+         | C47H76O2   |
| CE(20:5)                    | 6.89E+02 | 6.71E+02              | [M+NH4]+         | C47H74O2   |
| CE(22:4)                    | 7.19E+02 | 7.01E+02              | [M+NH4]+         | C49H80O2   |
| CE(22:6)                    | 7.15E+02 | 6.97E+02              | [M+NH4]+         | C49H76O2   |
| CE(24:1)                    | 7.53E+02 | 7.35E+02              | [M+NH4]+         | C51H90O2   |
| Carnitine C10:0             | 3.16E+02 | 3.15E+02              | [M+H]+           | C17H33NO4  |
| Carnitine C10:2             | 3.12E+02 | 3.11E+02              | [M+H]+           | C17H29NO4  |
| Carnitine C12:OH            | 3.60E+02 | 3.59E+02              | [M+H]+           | C19H37NO5  |
| Carnitine C12:0             | 3.44E+02 | 3.43E+02              | [M+H]+           | C19H37NO4  |
| Carnitine C12:1             | 3.42E+02 | 3.41E+02              | [M+H]+           | C19H35NO4  |
| Carnitine C12:1-2OH         | 3.74E+02 | 3.73E+02              | [M+H]+           | C19H35NO6  |
| Carnitine C13:0             | 3.58E+02 | 3.57E+02              | [M+H]+           | C20H39NO4  |
| Carnitine C14:OH            | 3.88E+02 | 3.87E+02              | [M+H]+           | C21H41NO5  |
| Carnitine C14:0             | 3.72E+02 | 3.71E+02              | [M+H]+           | C21H41NO4  |

|                      |          |          |                        |           |
|----------------------|----------|----------|------------------------|-----------|
| Carnitine C14:1      | 3.70E+02 | 3.69E+02 | [M+H] <sup>+</sup>     | C21H39NO4 |
| Carnitine C14:1-OH   | 3.86E+02 | 3.85E+02 | [M+H] <sup>+</sup>     | C21H39NO5 |
| Carnitine C15:0      | 3.86E+02 | 3.85E+02 | [M+H] <sup>+</sup>     | C22H43NO4 |
| Carnitine C15:1      | 3.84E+02 | 3.83E+02 | [M+H] <sup>+</sup>     | C22H41NO4 |
| Carnitine C16-OH     | 4.16E+02 | 4.15E+02 | [M+H] <sup>+</sup>     | C23H45NO5 |
| Carnitine C16:0      | 4.00E+02 | 3.99E+02 | [M+H] <sup>+</sup>     | C23H45NO4 |
| Carnitine C16:1      | 3.98E+02 | 3.97E+02 | [M+H] <sup>+</sup>     | C23H43NO4 |
| Carnitine C16:1-OH   | 4.14E+02 | 4.13E+02 | [M+H] <sup>+</sup>     | C23H43NO5 |
| Carnitine C16:2      | 3.96E+02 | 3.95E+02 | [M+H] <sup>+</sup>     | C23H41NO4 |
| Carnitine C17:0      | 4.14E+02 | 4.13E+02 | [M+H] <sup>+</sup>     | C24H47NO4 |
| Carnitine C17:1      | 4.12E+02 | 4.11E+02 | [M+H] <sup>+</sup>     | C24H45NO4 |
| Carnitine C18-OH     | 4.44E+02 | 4.43E+02 | [M+H] <sup>+</sup>     | C25H49NO5 |
| Carnitine C18:0      | 4.28E+02 | 4.27E+02 | [M+H] <sup>+</sup>     | C25H49NO4 |
| Carnitine C18:1      | 4.26E+02 | 4.25E+02 | [M+H] <sup>+</sup>     | C25H47NO4 |
| Carnitine C18:1-OH   | 4.42E+02 | 4.41E+02 | [M+H] <sup>+</sup>     | C25H47NO5 |
| Carnitine C18:2      | 4.24E+02 | 4.23E+02 | [M+H] <sup>+</sup>     | C25H45NO4 |
| Carnitine C18:2-OH   | 4.40E+02 | 4.39E+02 | [M+H] <sup>+</sup>     | C25H45NO5 |
| Carnitine C18:3      | 4.22E+02 | 4.21E+02 | [M+H] <sup>+</sup>     | C25H43NO4 |
| Carnitine C19:1      | 4.40E+02 | 4.39E+02 | [M+H] <sup>+</sup>     | C26H49NO4 |
| Carnitine C20:0      | 4.56E+02 | 4.55E+02 | [M+H] <sup>+</sup>     | C27H53NO4 |
| Carnitine C20:2      | 4.52E+02 | 4.51E+02 | [M+H] <sup>+</sup>     | C27H49NO4 |
| Carnitine C20:3      | 4.50E+02 | 4.49E+02 | [M+H] <sup>+</sup>     | C27H47NO4 |
| Carnitine C20:4      | 4.48E+02 | 4.47E+02 | [M+H] <sup>+</sup>     | C27H45NO4 |
| Carnitine C20:5      | 4.46E+02 | 4.45E+02 | [M+H] <sup>+</sup>     | C27H43NO4 |
| Carnitine C21:0      | 4.70E+02 | 4.69E+02 | [M+H] <sup>+</sup>     | C28H55NO4 |
| Carnitine C21:2      | 4.66E+02 | 4.65E+02 | [M+H] <sup>+</sup>     | C28H51NO4 |
| Carnitine C22:0      | 4.84E+02 | 4.83E+02 | [M+H] <sup>+</sup>     | C29H57NO4 |
| Carnitine C22:1      | 4.82E+02 | 4.81E+02 | [M+H] <sup>+</sup>     | C29H55NO4 |
| Carnitine C22:2      | 4.80E+02 | 4.79E+02 | [M+H] <sup>+</sup>     | C29H53NO4 |
| Carnitine C22:3      | 4.78E+02 | 4.77E+02 | [M+H] <sup>+</sup>     | C29H51NO4 |
| Carnitine C22:4      | 4.76E+02 | 4.75E+02 | [M+H] <sup>+</sup>     | C29H49NO4 |
| Carnitine C22:5      | 4.74E+02 | 4.73E+02 | [M+H] <sup>+</sup>     | C29H47NO4 |
| Carnitine C22:6      | 4.72E+02 | 4.71E+02 | [M+H] <sup>+</sup>     | C29H45NO4 |
| Carnitine C2:0       | 2.04E+02 | 2.03E+02 | [M+H] <sup>+</sup>     | C9H17NO4  |
| Carnitine C3:0       | 2.18E+02 | 2.17E+02 | [M+H] <sup>+</sup>     | C10H19NO4 |
| Carnitine C3:1-2OH   | 2.48E+02 | 2.47E+02 | [M+H] <sup>+</sup>     | C10H17NO6 |
| Carnitine C4-OH      | 2.48E+02 | 2.47E+02 | [M+H] <sup>+</sup>     | C11H21NO5 |
| Carnitine C4:0       | 2.32E+02 | 2.31E+02 | [M+H] <sup>+</sup>     | C11H21NO4 |
| Carnitine C4:1-2OH   | 2.62E+02 | 2.61E+02 | [M+H] <sup>+</sup>     | C11H19NO6 |
| Carnitine C5-OH      | 2.62E+02 | 2.61E+02 | [M+H] <sup>+</sup>     | C12H23NO5 |
| Carnitine C5:0       | 2.46E+02 | 2.45E+02 | [M+H] <sup>+</sup>     | C12H23NO4 |
| Carnitine C5:1       | 2.44E+02 | 2.43E+02 | [M+H] <sup>+</sup>     | C12H21NO4 |
| Carnitine C5:1-2OH   | 2.74E+02 | 2.73E+02 | [M+H] <sup>+</sup>     | C12H19NO6 |
| Carnitine C6-2OH     | 2.90E+02 | 2.89E+02 | [M+H] <sup>+</sup>     | C13H23NO6 |
| Carnitine C6-OH      | 2.76E+02 | 2.75E+02 | [M+H] <sup>+</sup>     | C13H25NO5 |
| Carnitine C6:0       | 2.60E+02 | 2.59E+02 | [M+H] <sup>+</sup>     | C13H25NO4 |
| Carnitine C6:1       | 2.58E+02 | 2.57E+02 | [M+H] <sup>+</sup>     | C13H23NO4 |
| Carnitine C8:0       | 2.88E+02 | 2.87E+02 | [M+H] <sup>+</sup>     | C15H29NO4 |
| Carnitine C8:1       | 2.86E+02 | 2.85E+02 | [M+H] <sup>+</sup>     | C15H27NO4 |
| Cer(d14:3/27:1(2OH)) | 6.29E+02 | 6.46E+02 | [M-H2O+H] <sup>+</sup> | C41H75NO4 |
| Cer(d16:0/18:0)      | 5.23E+02 | 5.40E+02 | [M-H2O+H] <sup>+</sup> | C34H69NO3 |
| Cer(d16:0/18:1)      | 5.21E+02 | 5.38E+02 | [M-H2O+H] <sup>+</sup> | C34H67NO3 |
| Cer(d16:1/16:0)      | 4.92E+02 | 5.09E+02 | [M-H2O+H] <sup>+</sup> | C32H63NO3 |
| Cer(d16:1/18:0)      | 5.21E+02 | 5.38E+02 | [M-H2O+H] <sup>+</sup> | C34H67NO3 |

|                      |          |          |            |            |
|----------------------|----------|----------|------------|------------|
| Cer(d16:1/20:0)      | 5.49E+02 | 5.66E+02 | [M-H2O+H]+ | C36H71NO3  |
| Cer(d16:1/22:0)      | 5.77E+02 | 5.94E+02 | [M-H2O+H]+ | C38H75NO3  |
| Cer(d16:1/23:0)      | 5.91E+02 | 6.08E+02 | [M-H2O+H]+ | C39H77NO3  |
| Cer(d16:1/24:0)      | 6.05E+02 | 6.22E+02 | [M-H2O+H]+ | C40H79NO3  |
| Cer(d16:1/24:1)      | 6.03E+02 | 6.20E+02 | [M-H2O+H]+ | C40H77NO3  |
| Cer(d16:1/24:2)      | 6.01E+02 | 6.18E+02 | [M-H2O+H]+ | C40H75NO3  |
| Cer(d16:1/26:0)      | 6.33E+02 | 6.50E+02 | [M-H2O+H]+ | C42H83NO3  |
| Cer(d16:1/26:1)      | 6.31E+02 | 6.48E+02 | [M-H2O+H]+ | C42H81NO3  |
| Cer(d17:0/18:1)      | 5.35E+02 | 5.52E+02 | [M-H2O+H]+ | C35H69NO3  |
| Cer(d17:1/14:0)      | 4.78E+02 | 4.95E+02 | [M-H2O+H]+ | C31H61NO3  |
| Cer(d17:1/16:0)      | 5.06E+02 | 5.23E+02 | [M-H2O+H]+ | C33H65NO3  |
| Cer(d17:1/18:0)      | 5.35E+02 | 5.52E+02 | [M-H2O+H]+ | C35H69NO3  |
| Cer(d17:1/20:0)      | 5.63E+02 | 5.80E+02 | [M-H2O+H]+ | C37H73NO3  |
| Cer(d17:1/21:0)      | 5.77E+02 | 5.94E+02 | [M-H2O+H]+ | C38H75NO3  |
| Cer(d17:1/22:1)      | 5.89E+02 | 6.06E+02 | [M-H2O+H]+ | C39H75NO3  |
| Cer(d17:1/23:1)      | 6.03E+02 | 6.20E+02 | [M-H2O+H]+ | C40H77NO3  |
| Cer(d17:1/24:0)      | 6.19E+02 | 6.36E+02 | [M-H2O+H]+ | C41H81NO3  |
| Cer(d17:1/24:1)      | 6.17E+02 | 6.34E+02 | [M-H2O+H]+ | C41H79NO3  |
| Cer(d17:1/25:1)      | 6.31E+02 | 6.48E+02 | [M-H2O+H]+ | C42H81NO3  |
| Cer(d17:2/40:0(2OH)) | 8.57E+02 | 8.74E+02 | [M-H2O+H]+ | C57H111NO4 |
| Cer(d18:0/16:0)      | 5.23E+02 | 5.40E+02 | [M-H2O+H]+ | C34H69NO3  |
| Cer(d18:0/18:0(2OH)) | 5.67E+02 | 5.84E+02 | [M-H2O+H]+ | C36H73NO4  |
| Cer(d18:0/18:0)      | 5.51E+02 | 5.68E+02 | [M-H2O+H]+ | C36H73NO3  |
| Cer(d18:0/18:1)      | 5.49E+02 | 5.66E+02 | [M-H2O+H]+ | C36H71NO3  |
| Cer(d18:0/18:2)      | 5.47E+02 | 5.64E+02 | [M-H2O+H]+ | C36H69NO3  |
| Cer(d18:0/19:1)      | 5.63E+02 | 5.80E+02 | [M-H2O+H]+ | C37H73NO3  |
| Cer(d18:0/20:0)      | 5.79E+02 | 5.96E+02 | [M-H2O+H]+ | C38H77NO3  |
| Cer(d18:0/22:0(2OH)) | 6.23E+02 | 6.40E+02 | [M-H2O+H]+ | C40H81NO4  |
| Cer(d18:0/22:0)      | 6.07E+02 | 6.24E+02 | [M-H2O+H]+ | C40H81NO3  |
| Cer(d18:0/22:1(2OH)) | 6.21E+02 | 6.38E+02 | [M-H2O+H]+ | C40H79NO4  |
| Cer(d18:0/23:0)      | 6.21E+02 | 6.38E+02 | [M-H2O+H]+ | C41H83NO3  |
| Cer(d18:0/24:0)      | 6.35E+02 | 6.52E+02 | [M-H2O+H]+ | C42H85NO3  |
| Cer(d18:0/24:1)      | 6.33E+02 | 6.50E+02 | [M-H2O+H]+ | C42H83NO3  |
| Cer(d18:1/14:0)      | 4.92E+02 | 5.09E+02 | [M-H2O+H]+ | C32H63NO3  |
| Cer(d18:1/15:0)      | 5.06E+02 | 5.23E+02 | [M-H2O+H]+ | C33H65NO3  |
| Cer(d18:1/15:1(2OH)) | 5.20E+02 | 5.37E+02 | [M-H2O+H]+ | C33H63NO4  |
| Cer(d18:1/16:0(2OH)) | 5.55E+02 | 5.54E+02 | [M+H]+     | C34H67NO4  |
| Cer(d18:1/16:0)      | 5.21E+02 | 5.38E+02 | [M-H2O+H]+ | C34H67NO3  |
| Cer(d18:1/16:1(2OH)) | 5.34E+02 | 5.51E+02 | [M-H2O+H]+ | C34H65NO4  |
| Cer(d18:1/16:1)      | 5.18E+02 | 5.35E+02 | [M-H2O+H]+ | C34H65NO3  |
| Cer(d18:1/17:0)      | 5.35E+02 | 5.52E+02 | [M-H2O+H]+ | C35H69NO3  |
| Cer(d18:1/18:0(2OH)) | 5.65E+02 | 5.82E+02 | [M-H2O+H]+ | C36H71NO4  |
| Cer(d18:1/18:0)      | 5.49E+02 | 5.66E+02 | [M-H2O+H]+ | C36H71NO3  |
| Cer(d18:1/18:1)      | 5.47E+02 | 5.64E+02 | [M-H2O+H]+ | C36H69NO3  |
| Cer(d18:1/19:0)      | 5.63E+02 | 5.80E+02 | [M-H2O+H]+ | C37H73NO3  |
| Cer(d18:1/20:0)      | 5.77E+02 | 5.94E+02 | [M-H2O+H]+ | C38H75NO3  |
| Cer(d18:1/20:1)      | 5.75E+02 | 5.92E+02 | [M-H2O+H]+ | C38H73NO3  |
| Cer(d18:1/21:0(2OH)) | 6.07E+02 | 6.24E+02 | [M-H2O+H]+ | C39H77NO4  |
| Cer(d18:1/21:0)      | 5.91E+02 | 6.08E+02 | [M-H2O+H]+ | C39H77NO3  |
| Cer(d18:1/22:0(2OH)) | 6.39E+02 | 6.38E+02 | [M+H]+     | C40H79NO4  |
| Cer(d18:1/22:0)      | 6.05E+02 | 6.22E+02 | [M-H2O+H]+ | C40H79NO3  |
| Cer(d18:1/22:1)      | 6.03E+02 | 6.20E+02 | [M-H2O+H]+ | C40H77NO3  |
| Cer(d18:1/22:2)      | 6.01E+02 | 6.18E+02 | [M-H2O+H]+ | C40H75NO3  |
| Cer(d18:1/23:0(2OH)) | 6.53E+02 | 6.52E+02 | [M+H]+     | C41H81NO4  |

|                      |          |          |            |            |
|----------------------|----------|----------|------------|------------|
| Cer(d18:1/23:0)      | 6.19E+02 | 6.36E+02 | [M-H2O+H]+ | C41H81NO3  |
| Cer(d18:1/23:1)      | 6.17E+02 | 6.34E+02 | [M-H2O+H]+ | C41H79NO3  |
| Cer(d18:1/24:0(2OH)) | 6.67E+02 | 6.66E+02 | [M+H]+     | C42H83NO4  |
| Cer(d18:1/24:0)      | 6.33E+02 | 6.50E+02 | [M-H2O+H]+ | C42H83NO3  |
| Cer(d18:1/24:1)      | 6.31E+02 | 6.48E+02 | [M-H2O+H]+ | C42H81NO3  |
| Cer(d18:1/24:2)      | 6.29E+02 | 6.46E+02 | [M-H2O+H]+ | C42H79NO3  |
| Cer(d18:1/25:0(2OH)) | 6.81E+02 | 6.80E+02 | [M+H]+     | C43H85NO4  |
| Cer(d18:1/25:0)      | 6.47E+02 | 6.64E+02 | [M-H2O+H]+ | C43H85NO3  |
| Cer(d18:1/25:1)      | 6.45E+02 | 6.62E+02 | [M-H2O+H]+ | C43H83NO3  |
| Cer(d18:1/26:0)      | 6.61E+02 | 6.78E+02 | [M-H2O+H]+ | C44H87NO3  |
| Cer(d18:1/26:1)      | 6.59E+02 | 6.76E+02 | [M-H2O+H]+ | C44H85NO3  |
| Cer(d18:1/26:2)      | 6.57E+02 | 6.74E+02 | [M-H2O+H]+ | C44H83NO3  |
| Cer(d18:1/40:2(2OH)) | 8.69E+02 | 8.86E+02 | [M-H2O+H]+ | C58H111NO4 |
| Cer(d18:2/14:0)      | 4.90E+02 | 5.07E+02 | [M-H2O+H]+ | C32H61NO3  |
| Cer(d18:2/16:0)      | 5.18E+02 | 5.35E+02 | [M-H2O+H]+ | C34H65NO3  |
| Cer(d18:2/17:0)      | 5.33E+02 | 5.50E+02 | [M-H2O+H]+ | C35H67NO3  |
| Cer(d18:2/18:0)      | 5.47E+02 | 5.64E+02 | [M-H2O+H]+ | C36H69NO3  |
| Cer(d18:2/19:0)      | 5.61E+02 | 5.78E+02 | [M-H2O+H]+ | C37H71NO3  |
| Cer(d18:2/20:0)      | 5.75E+02 | 5.92E+02 | [M-H2O+H]+ | C38H73NO3  |
| Cer(d18:2/21:0)      | 5.89E+02 | 6.06E+02 | [M-H2O+H]+ | C39H75NO3  |
| Cer(d18:2/22:0(2OH)) | 6.19E+02 | 6.36E+02 | [M-H2O+H]+ | C40H77NO4  |
| Cer(d18:2/22:0)      | 6.03E+02 | 6.20E+02 | [M-H2O+H]+ | C40H77NO3  |
| Cer(d18:2/22:1)      | 6.01E+02 | 6.18E+02 | [M-H2O+H]+ | C40H75NO3  |
| Cer(d18:2/23:0)      | 6.17E+02 | 6.34E+02 | [M-H2O+H]+ | C41H79NO3  |
| Cer(d18:2/23:1(2OH)) | 6.31E+02 | 6.48E+02 | [M-H2O+H]+ | C41H77NO4  |
| Cer(d18:2/24:0)      | 6.31E+02 | 6.48E+02 | [M-H2O+H]+ | C42H81NO3  |
| Cer(d18:2/24:1)      | 6.29E+02 | 6.46E+02 | [M-H2O+H]+ | C42H79NO3  |
| Cer(d18:2/24:2)      | 6.27E+02 | 6.44E+02 | [M-H2O+H]+ | C42H77NO3  |
| Cer(d18:2/25:0)      | 6.45E+02 | 6.62E+02 | [M-H2O+H]+ | C43H83NO3  |
| Cer(d18:2/25:1)      | 6.43E+02 | 6.60E+02 | [M-H2O+H]+ | C43H81NO3  |
| Cer(d18:2/26:1)      | 6.57E+02 | 6.74E+02 | [M-H2O+H]+ | C44H83NO3  |
| Cer(d19:1/16:0)      | 5.35E+02 | 5.52E+02 | [M-H2O+H]+ | C35H69NO3  |
| Cer(d19:1/18:0)      | 5.63E+02 | 5.80E+02 | [M-H2O+H]+ | C37H73NO3  |
| Cer(d19:1/22:0)      | 6.19E+02 | 6.36E+02 | [M-H2O+H]+ | C41H81NO3  |
| Cer(d19:1/23:0)      | 6.33E+02 | 6.50E+02 | [M-H2O+H]+ | C42H83NO3  |
| Cer(d19:1/24:1)      | 6.45E+02 | 6.62E+02 | [M-H2O+H]+ | C43H83NO3  |
| Cer(d20:0/18:2)      | 5.75E+02 | 5.92E+02 | [M-H2O+H]+ | C38H73NO3  |
| Cer(d20:1/22:1)      | 6.31E+02 | 6.48E+02 | [M-H2O+H]+ | C42H81NO3  |
| Cer(d20:1/23:1)      | 6.45E+02 | 6.62E+02 | [M-H2O+H]+ | C43H83NO3  |
| Cer(d20:1/24:0(2OH)) | 6.77E+02 | 6.94E+02 | [M-H2O+H]+ | C44H87NO4  |
| Cer(d20:1/24:1(2OH)) | 6.75E+02 | 6.92E+02 | [M-H2O+H]+ | C44H85NO4  |
| Cer(d20:1/24:1)      | 6.59E+02 | 6.76E+02 | [M-H2O+H]+ | C44H85NO3  |
| Cer(d20:1/25:0)      | 6.75E+02 | 6.92E+02 | [M-H2O+H]+ | C45H89NO3  |
| Cer(d20:2/24:0)      | 6.59E+02 | 6.76E+02 | [M-H2O+H]+ | C44H85NO3  |
| Cer(d20:2/24:1)      | 6.57E+02 | 6.74E+02 | [M-H2O+H]+ | C44H83NO3  |
| Cer(d21:2/38:2(2OH)) | 8.81E+02 | 8.98E+02 | [M-H2O+H]+ | C59H111NO4 |
| Cer(d22:0/18:1)      | 6.05E+02 | 6.22E+02 | [M-H2O+H]+ | C40H79NO3  |
| Cer(d22:0/21:1)      | 6.47E+02 | 6.64E+02 | [M-H2O+H]+ | C43H85NO3  |
| Cer(d23:0/18:1)      | 6.19E+02 | 6.36E+02 | [M-H2O+H]+ | C41H81NO3  |
| Cer(d24:0/18:0)      | 6.35E+02 | 6.52E+02 | [M-H2O+H]+ | C42H85NO3  |
| Cer(d24:1/18:0(2OH)) | 6.49E+02 | 6.66E+02 | [M-H2O+H]+ | C42H83NO4  |
| Cer(d24:2/33:0(2OH)) | 8.57E+02 | 8.74E+02 | [M-H2O+H]+ | C57H111NO4 |
| Cer(d25:2/32:0(2OH)) | 8.57E+02 | 8.74E+02 | [M-H2O+H]+ | C57H111NO4 |
| Cer(d26:1/31:1(2OH)) | 8.57E+02 | 8.74E+02 | [M-H2O+H]+ | C57H111NO4 |

|                      |          |          |            |            |
|----------------------|----------|----------|------------|------------|
| Cer(d26:2/31:0(2OH)) | 8.57E+02 | 8.74E+02 | [M-H2O+H]+ | C57H111NO4 |
| Cer(d27:1/30:1(2OH)) | 8.57E+02 | 8.74E+02 | [M-H2O+H]+ | C57H111NO4 |
| Cer(d27:2/30:0(2OH)) | 8.57E+02 | 8.74E+02 | [M-H2O+H]+ | C57H111NO4 |
| Cer(d27:2/32:1(2OH)) | 8.83E+02 | 9.00E+02 | [M-H2O+H]+ | C59H113NO4 |
| Cer(d28:1/29:1(2OH)) | 8.57E+02 | 8.74E+02 | [M-H2O+H]+ | C57H111NO4 |
| Cer(d28:2/31:1(2OH)) | 8.83E+02 | 9.00E+02 | [M-H2O+H]+ | C59H113NO4 |
| Cer(d29:1/28:1(2OH)) | 8.57E+02 | 8.74E+02 | [M-H2O+H]+ | C57H111NO4 |
| Cer(d29:1/30:2(2OH)) | 8.83E+02 | 9.00E+02 | [M-H2O+H]+ | C59H113NO4 |
| Cer(d29:2/28:0(2OH)) | 8.57E+02 | 8.74E+02 | [M-H2O+H]+ | C57H111NO4 |
| Cer(d30:1/27:1(2OH)) | 8.57E+02 | 8.74E+02 | [M-H2O+H]+ | C57H111NO4 |
| Cer(t14:1/24:1(2OH)) | 6.07E+02 | 6.24E+02 | [M-H2O+H]+ | C38H73NO5  |
| Cer(t15:0/22:2)      | 5.77E+02 | 5.94E+02 | [M-H2O+H]+ | C37H71NO4  |
| Cer(t16:1/26:0)      | 6.49E+02 | 6.66E+02 | [M-H2O+H]+ | C42H83NO4  |
| Cer(t16:1/27:0)      | 6.63E+02 | 6.80E+02 | [M-H2O+H]+ | C43H85NO4  |
| Cer(t16:2/22:0(2OH)) | 6.07E+02 | 6.24E+02 | [M-H2O+H]+ | C38H73NO5  |
| Cer(t17:0/22:1)      | 6.07E+02 | 6.24E+02 | [M-H2O+H]+ | C39H77NO4  |
| Cer(t17:0/22:2)      | 6.05E+02 | 6.22E+02 | [M-H2O+H]+ | C39H75NO4  |
| Cer(t17:1/20:0)      | 5.79E+02 | 5.96E+02 | [M-H2O+H]+ | C37H73NO4  |
| Cer(t17:1/22:0)      | 6.07E+02 | 6.24E+02 | [M-H2O+H]+ | C39H77NO4  |
| Cer(t17:1/22:1)      | 6.05E+02 | 6.22E+02 | [M-H2O+H]+ | C39H75NO4  |
| Cer(t17:1/22:2)      | 6.03E+02 | 6.20E+02 | [M-H2O+H]+ | C39H73NO4  |
| Cer(t17:2/16:0)      | 5.20E+02 | 5.37E+02 | [M-H2O+H]+ | C33H63NO4  |
| Cer(t17:2/18:0)      | 5.49E+02 | 5.66E+02 | [M-H2O+H]+ | C35H67NO4  |
| Cer(t17:2/18:1)      | 5.46E+02 | 5.63E+02 | [M-H2O+H]+ | C35H65NO4  |
| Cer(t17:2/20:1)      | 5.75E+02 | 5.92E+02 | [M-H2O+H]+ | C37H69NO4  |
| Cer(t17:2/22:0)      | 6.05E+02 | 6.22E+02 | [M-H2O+H]+ | C39H75NO4  |
| Cer(t17:2/22:1)      | 6.03E+02 | 6.20E+02 | [M-H2O+H]+ | C39H73NO4  |
| Cer(t17:2/23:0)      | 6.19E+02 | 6.36E+02 | [M-H2O+H]+ | C40H77NO4  |
| Cer(t17:2/24:1)      | 6.31E+02 | 6.48E+02 | [M-H2O+H]+ | C41H77NO4  |
| Cer(t17:2/25:0)      | 6.47E+02 | 6.64E+02 | [M-H2O+H]+ | C42H81NO4  |
| Cer(t17:2/26:1)      | 6.59E+02 | 6.76E+02 | [M-H2O+H]+ | C43H81NO4  |
| Cer(t17:2/33:0)      | 7.59E+02 | 7.76E+02 | [M-H2O+H]+ | C50H97NO4  |
| Cer(t17:2/35:0)      | 7.87E+02 | 8.04E+02 | [M-H2O+H]+ | C52H101NO4 |
| Cer(t17:2/35:1)      | 7.85E+02 | 8.02E+02 | [M-H2O+H]+ | C52H99NO4  |
| Cer(t18:0/15:1)      | 5.22E+02 | 5.39E+02 | [M-H2O+H]+ | C33H65NO4  |
| Cer(t18:0/16:0)      | 5.57E+02 | 5.56E+02 | [M+H]+     | C34H69NO4  |
| Cer(t18:0/18:0(2OH)) | 5.83E+02 | 6.00E+02 | [M-H2O+H]+ | C36H73NO5  |
| Cer(t18:0/20:0(2OH)) | 6.11E+02 | 6.28E+02 | [M-H2O+H]+ | C38H77NO5  |
| Cer(t18:0/21:0(2OH)) | 6.25E+02 | 6.42E+02 | [M-H2O+H]+ | C39H79NO5  |
| Cer(t18:0/22:0)      | 6.41E+02 | 6.40E+02 | [M+H]+     | C40H81NO4  |
| Cer(t18:0/24:0)      | 6.69E+02 | 6.68E+02 | [M+H]+     | C42H85NO4  |
| Cer(t18:0/24:1)      | 6.67E+02 | 6.66E+02 | [M+H]+     | C42H83NO4  |
| Cer(t18:1/15:1)      | 5.20E+02 | 5.37E+02 | [M-H2O+H]+ | C33H63NO4  |
| Cer(t18:1/20:1(2OH)) | 6.07E+02 | 6.24E+02 | [M-H2O+H]+ | C38H73NO5  |
| Cer(t18:1/38:2(2OH)) | 8.57E+02 | 8.74E+02 | [M-H2O+H]+ | C56H107NO5 |
| Cer(t18:2/40:2(2OH)) | 8.83E+02 | 9.00E+02 | [M-H2O+H]+ | C58H109NO5 |
| Cer(t20:1/38:2(2OH)) | 8.85E+02 | 9.02E+02 | [M-H2O+H]+ | C58H111NO5 |
| Cer(t20:2/15:0)      | 5.49E+02 | 5.66E+02 | [M-H2O+H]+ | C35H67NO4  |
| Cer(t20:2/18:0(2OH)) | 6.07E+02 | 6.24E+02 | [M-H2O+H]+ | C38H73NO5  |
| Cer(t20:2/18:1(2OH)) | 6.05E+02 | 6.22E+02 | [M-H2O+H]+ | C38H71NO5  |
| Cer(t20:2/36:1(2OH)) | 8.57E+02 | 8.74E+02 | [M-H2O+H]+ | C56H107NO5 |
| Cer(t20:2/38:1(2OH)) | 8.85E+02 | 9.02E+02 | [M-H2O+H]+ | C58H111NO5 |
| Cer(t20:2/38:2(2OH)) | 8.83E+02 | 9.00E+02 | [M-H2O+H]+ | C58H109NO5 |
| Cer(t20:2/40:2(2OH)) | 9.11E+02 | 9.28E+02 | [M-H2O+H]+ | C60H113NO5 |

|                       |          |          |            |            |
|-----------------------|----------|----------|------------|------------|
| Cer(t22:1/34:2(2OH))  | 8.57E+02 | 8.74E+02 | [M-H2O+H]+ | C56H107NO5 |
| Cer(t24:0/18:0)       | 6.51E+02 | 6.68E+02 | [M-H2O+H]+ | C42H85NO4  |
| Cer(t24:0/18:1)       | 6.49E+02 | 6.66E+02 | [M-H2O+H]+ | C42H83NO4  |
| Cer(t24:1/32:2(2OH))  | 8.57E+02 | 8.74E+02 | [M-H2O+H]+ | C56H107NO5 |
| Cer(t24:2/16:2(2OH))  | 6.31E+02 | 6.48E+02 | [M-H2O+H]+ | C40H73NO5  |
| Cer(t26:1/12:1(2OH))  | 6.07E+02 | 6.24E+02 | [M-H2O+H]+ | C38H73NO5  |
| Cer(t26:1/30:2(2OH))  | 8.57E+02 | 8.74E+02 | [M-H2O+H]+ | C56H107NO5 |
| Cer(t26:2/34:2(2OH))  | 9.11E+02 | 9.28E+02 | [M-H2O+H]+ | C60H113NO5 |
| Cer(t30:0/18:1(2OH))  | 7.49E+02 | 7.66E+02 | [M-H2O+H]+ | C48H95NO5  |
| CerP(d18:1/24:0)      | 7.29E+02 | 7.30E+02 | [M-H]-     | C42H84NO6P |
| Chenodeoxycholic acid | 3.92E+02 | 3.92E+02 | [M-H]-     | C24H40O4   |
| Cholesterol           | 3.69E+02 | 3.86E+02 | [M-H2O+H]+ | C27H46O    |
| Coenzyme Q10          | 8.64E+02 | 8.63E+02 | [M+H]+     | C59H90O4   |
| Coenzyme Q8           | 7.28E+02 | 7.81E+02 | [M+H]+     | C53H80O4   |
| Coenzyme Q9           | 7.96E+02 | 7.95E+02 | [M+H]+     | C54H82O4   |
| DG(12:0_20:0)         | 5.87E+02 | 5.69E+02 | [M+NH4]+   | C35H68O5   |
| DG(14:0_16:0)         | 5.59E+02 | 5.40E+02 | [M+NH4]+   | C33H64O5   |
| DG(14:0_16:1)         | 5.57E+02 | 5.38E+02 | [M+NH4]+   | C33H62O5   |
| DG(14:0_18:0)         | 5.87E+02 | 5.69E+02 | [M+NH4]+   | C35H68O5   |
| DG(14:0_18:1)         | 5.85E+02 | 5.66E+02 | [M+NH4]+   | C35H66O5   |
| DG(14:0_18:2)         | 5.83E+02 | 5.64E+02 | [M+NH4]+   | C35H64O5   |
| DG(14:0_20:0)         | 6.15E+02 | 5.97E+02 | [M+NH4]+   | C37H72O5   |
| DG(14:0_22:0)         | 6.43E+02 | 6.25E+02 | [M+NH4]+   | C39H76O5   |
| DG(14:1_22:2)         | 6.37E+02 | 6.19E+02 | [M+NH4]+   | C39H70O5   |
| DG(15:0_18:1)         | 5.99E+02 | 5.81E+02 | [M+NH4]+   | C36H68O5   |
| DG(15:0_18:2)         | 5.97E+02 | 5.78E+02 | [M+NH4]+   | C36H66O5   |
| DG(16:0_16:0)         | 5.87E+02 | 5.69E+02 | [M+NH4]+   | C35H68O5   |
| DG(16:0_16:1)         | 5.85E+02 | 5.66E+02 | [M+NH4]+   | C35H66O5   |
| DG(16:0_17:1)         | 5.99E+02 | 5.81E+02 | [M+NH4]+   | C36H68O5   |
| DG(16:0_18:0)         | 6.15E+02 | 5.97E+02 | [M+NH4]+   | C37H72O5   |
| DG(16:0_18:1)         | 6.13E+02 | 5.95E+02 | [M+NH4]+   | C37H70O5   |
| DG(16:0_18:2)         | 6.11E+02 | 5.93E+02 | [M+NH4]+   | C37H68O5   |
| DG(16:0_18:3)         | 6.09E+02 | 5.90E+02 | [M+NH4]+   | C37H66O5   |
| DG(16:0_19:1)         | 6.27E+02 | 6.09E+02 | [M+NH4]+   | C38H72O5   |
| DG(16:0_20:0)         | 6.43E+02 | 6.25E+02 | [M+NH4]+   | C39H76O5   |
| DG(16:0_20:1)         | 6.41E+02 | 6.23E+02 | [M+NH4]+   | C39H74O5   |
| DG(16:0_20:2)         | 6.39E+02 | 6.21E+02 | [M+NH4]+   | C39H72O5   |
| DG(16:0_20:3)         | 6.37E+02 | 6.19E+02 | [M+NH4]+   | C39H70O5   |
| DG(16:0_20:4)         | 6.35E+02 | 6.17E+02 | [M+NH4]+   | C39H68O5   |
| DG(16:0_20:5)         | 6.33E+02 | 6.14E+02 | [M+NH4]+   | C39H66O5   |
| DG(16:0_22:5)         | 6.61E+02 | 6.43E+02 | [M+NH4]+   | C41H70O5   |
| DG(16:0_22:6)         | 6.59E+02 | 6.41E+02 | [M+NH4]+   | C41H68O5   |
| DG(16:0_24:4)         | 6.91E+02 | 6.73E+02 | [M+NH4]+   | C43H76O5   |
| DG(16:1_16:1)         | 5.83E+02 | 5.64E+02 | [M+NH4]+   | C35H64O5   |
| DG(16:1_18:0)         | 6.13E+02 | 5.95E+02 | [M+NH4]+   | C37H70O5   |
| DG(16:1_18:1)         | 6.11E+02 | 5.93E+02 | [M+NH4]+   | C37H68O5   |
| DG(16:1_18:2)         | 6.09E+02 | 5.90E+02 | [M+NH4]+   | C37H66O5   |
| DG(16:1_18:3)         | 6.07E+02 | 5.88E+02 | [M+NH4]+   | C37H64O5   |
| DG(16:1_20:2)         | 6.37E+02 | 6.19E+02 | [M+NH4]+   | C39H70O5   |
| DG(16:1_20:3)         | 6.35E+02 | 6.17E+02 | [M+NH4]+   | C39H68O5   |
| DG(16:1_20:4)         | 6.33E+02 | 6.14E+02 | [M+NH4]+   | C39H66O5   |
| DG(16:1_22:5)         | 6.59E+02 | 6.41E+02 | [M+NH4]+   | C41H68O5   |
| DG(16:1_22:6)         | 6.57E+02 | 6.38E+02 | [M+NH4]+   | C41H66O5   |
| DG(16:2_18:2)         | 6.07E+02 | 5.88E+02 | [M+NH4]+   | C37H64O5   |

|               |          |          |          |          |
|---------------|----------|----------|----------|----------|
| DG(17:0_18:1) | 6.27E+02 | 6.09E+02 | [M+NH4]+ | C38H72O5 |
| DG(17:0_18:2) | 6.25E+02 | 6.07E+02 | [M+NH4]+ | C38H70O5 |
| DG(17:1_18:2) | 6.23E+02 | 6.05E+02 | [M+NH4]+ | C38H68O5 |
| DG(17:1_20:4) | 6.47E+02 | 6.29E+02 | [M+NH4]+ | C40H68O5 |
| DG(18:0_18:0) | 6.43E+02 | 6.25E+02 | [M+NH4]+ | C39H76O5 |
| DG(18:0_18:1) | 6.41E+02 | 6.23E+02 | [M+NH4]+ | C39H74O5 |
| DG(18:0_18:2) | 6.39E+02 | 6.21E+02 | [M+NH4]+ | C39H72O5 |
| DG(18:0_20:1) | 6.69E+02 | 6.51E+02 | [M+NH4]+ | C41H78O5 |
| DG(18:0_20:2) | 6.67E+02 | 6.49E+02 | [M+NH4]+ | C41H76O5 |
| DG(18:0_20:3) | 6.65E+02 | 6.47E+02 | [M+NH4]+ | C41H74O5 |
| DG(18:0_20:4) | 6.63E+02 | 6.45E+02 | [M+NH4]+ | C41H72O5 |
| DG(18:0_20:5) | 6.61E+02 | 6.43E+02 | [M+NH4]+ | C41H70O5 |
| DG(18:0_22:4) | 6.91E+02 | 6.73E+02 | [M+NH4]+ | C43H76O5 |
| DG(18:0_22:5) | 6.89E+02 | 6.71E+02 | [M+NH4]+ | C43H74O5 |
| DG(18:0_22:6) | 6.87E+02 | 6.69E+02 | [M+NH4]+ | C43H72O5 |
| DG(18:1_18:1) | 6.39E+02 | 6.21E+02 | [M+NH4]+ | C39H72O5 |
| DG(18:1_18:2) | 6.37E+02 | 6.19E+02 | [M+NH4]+ | C39H70O5 |
| DG(18:1_20:0) | 6.69E+02 | 6.51E+02 | [M+NH4]+ | C41H78O5 |
| DG(18:1_20:1) | 6.67E+02 | 6.49E+02 | [M+NH4]+ | C41H76O5 |
| DG(18:1_20:2) | 6.65E+02 | 6.47E+02 | [M+NH4]+ | C41H74O5 |
| DG(18:1_20:3) | 6.63E+02 | 6.45E+02 | [M+NH4]+ | C41H72O5 |
| DG(18:1_20:4) | 6.61E+02 | 6.43E+02 | [M+NH4]+ | C41H70O5 |
| DG(18:1_20:5) | 6.59E+02 | 6.41E+02 | [M+NH4]+ | C41H68O5 |
| DG(18:1_22:1) | 6.95E+02 | 6.77E+02 | [M+NH4]+ | C43H80O5 |
| DG(18:1_22:4) | 6.89E+02 | 6.71E+02 | [M+NH4]+ | C43H74O5 |
| DG(18:1_22:6) | 6.85E+02 | 6.67E+02 | [M+NH4]+ | C43H70O5 |
| DG(18:1_24:0) | 7.25E+02 | 7.07E+02 | [M+NH4]+ | C45H86O5 |
| DG(18:1_24:1) | 7.23E+02 | 7.05E+02 | [M+NH4]+ | C45H84O5 |
| DG(18:2_18:2) | 6.35E+02 | 6.17E+02 | [M+NH4]+ | C39H68O5 |
| DG(18:2_18:3) | 6.33E+02 | 6.14E+02 | [M+NH4]+ | C39H66O5 |
| DG(18:2_18:4) | 6.31E+02 | 6.12E+02 | [M+NH4]+ | C39H64O5 |
| DG(18:2_20:1) | 6.65E+02 | 6.47E+02 | [M+NH4]+ | C41H74O5 |
| DG(18:2_20:2) | 6.63E+02 | 6.45E+02 | [M+NH4]+ | C41H72O5 |
| DG(18:2_20:3) | 6.61E+02 | 6.43E+02 | [M+NH4]+ | C41H70O5 |
| DG(18:2_20:4) | 6.59E+02 | 6.41E+02 | [M+NH4]+ | C41H68O5 |
| DG(18:2_20:5) | 6.57E+02 | 6.38E+02 | [M+NH4]+ | C41H66O5 |
| DG(18:2_22:4) | 6.87E+02 | 6.69E+02 | [M+NH4]+ | C43H72O5 |
| DG(18:2_22:5) | 6.85E+02 | 6.67E+02 | [M+NH4]+ | C43H70O5 |
| DG(18:2_22:6) | 6.83E+02 | 6.65E+02 | [M+NH4]+ | C43H68O5 |
| DG(18:2_24:6) | 7.11E+02 | 6.93E+02 | [M+NH4]+ | C45H72O5 |
| DG(18:3_18:3) | 6.31E+02 | 6.12E+02 | [M+NH4]+ | C39H64O5 |
| DG(18:3_22:5) | 6.83E+02 | 6.65E+02 | [M+NH4]+ | C43H68O5 |
| DG(19:0_18:0) | 6.57E+02 | 6.39E+02 | [M+NH4]+ | C40H78O5 |
| DG(19:0_18:1) | 6.55E+02 | 6.37E+02 | [M+NH4]+ | C40H76O5 |
| DG(19:1_18:2) | 6.51E+02 | 6.33E+02 | [M+NH4]+ | C40H72O5 |
| DG(20:0_18:0) | 6.71E+02 | 6.53E+02 | [M+NH4]+ | C41H80O5 |
| DG(20:0_18:2) | 6.67E+02 | 6.49E+02 | [M+NH4]+ | C41H76O5 |
| DG(20:4_22:6) | 7.07E+02 | 6.89E+02 | [M+NH4]+ | C45H68O5 |
| DG(21:0_16:0) | 6.57E+02 | 6.39E+02 | [M+NH4]+ | C40H78O5 |
| DG(21:0_18:1) | 6.83E+02 | 6.65E+02 | [M+NH4]+ | C42H80O5 |
| DG(22:0_18:1) | 6.97E+02 | 6.79E+02 | [M+NH4]+ | C43H82O5 |
| DG(23:0_18:1) | 7.11E+02 | 6.93E+02 | [M+NH4]+ | C44H84O5 |
| DG(24:0_18:1) | 7.25E+02 | 7.07E+02 | [M+NH4]+ | C45H86O5 |
| DG(8:0_16:0)  | 4.74E+02 | 4.56E+02 | [M+NH4]+ | C27H52O5 |

|                     |          |          |            |             |
|---------------------|----------|----------|------------|-------------|
| DG(8:0_18:2)        | 4.98E+02 | 4.80E+02 | [M+NH4]+   | C29H52O5    |
| DG(O-16:0_20:1)     | 6.27E+02 | 6.09E+02 | [M+NH4]+   | C39H76O4    |
| DG(O-16:1_16:0)     | 5.71E+02 | 5.53E+02 | [M+NH4]+   | C35H68O4    |
| DG(O-18:0_20:1)     | 6.55E+02 | 6.37E+02 | [M+NH4]+   | C41H80O4    |
| DG(O-18:2_20:1)     | 6.51E+02 | 6.33E+02 | [M+NH4]+   | C41H76O4    |
| DG(O-18:2_22:1)     | 6.79E+02 | 6.61E+02 | [M+NH4]+   | C43H80O4    |
| DG(O-19:0_16:0)     | 6.15E+02 | 5.97E+02 | [M+NH4]+   | C38H76O4    |
| DG(O-21:0_16:0)     | 6.43E+02 | 6.25E+02 | [M+NH4]+   | C40H80O4    |
| DL-Carnitine        | 1.62E+02 | 1.61E+02 | [M+H]+     | C7H15NO3    |
| FFA(10:0)           | 1.71E+02 | 1.72E+02 | [M-H]-     | C10H20O2    |
| FFA(14:0)           | 2.27E+02 | 2.28E+02 | [M-H]-     | C14H28O2    |
| FFA(15:0)           | 2.41E+02 | 2.42E+02 | [M-H]-     | C15H30O2    |
| FFA(16:0)           | 2.55E+02 | 2.56E+02 | [M-H]-     | C16H32O2    |
| FFA(16:1)           | 2.53E+02 | 2.54E+02 | [M-H]-     | C16H30O2    |
| FFA(17:0)           | 2.69E+02 | 2.70E+02 | [M-H]-     | C17H34O2    |
| FFA(17:1)           | 2.67E+02 | 2.68E+02 | [M-H]-     | C17H32O2    |
| FFA(18:0)           | 2.83E+02 | 2.84E+02 | [M-H]-     | C18H36O2    |
| FFA(18:1)           | 2.81E+02 | 2.82E+02 | [M-H]-     | C18H34O2    |
| FFA(18:2)           | 2.79E+02 | 2.80E+02 | [M-H]-     | C18H32O2    |
| FFA(18:3)           | 2.77E+02 | 2.78E+02 | [M-H]-     | C18H30O2    |
| FFA(19:0)           | 2.97E+02 | 2.98E+02 | [M-H]-     | C19H38O2    |
| FFA(19:1)           | 2.95E+02 | 2.96E+02 | [M-H]-     | C19H36O2    |
| FFA(19:2)           | 2.93E+02 | 2.94E+02 | [M-H]-     | C19H34O2    |
| FFA(20:1)           | 3.09E+02 | 3.10E+02 | [M-H]-     | C20H38O2    |
| FFA(20:2)           | 3.07E+02 | 3.08E+02 | [M-H]-     | C20H36O2    |
| FFA(20:3)           | 3.05E+02 | 3.06E+02 | [M-H]-     | C20H34O2    |
| FFA(20:4)           | 3.03E+02 | 3.04E+02 | [M-H]-     | C20H32O2    |
| FFA(20:5)           | 3.01E+02 | 3.02E+02 | [M-H]-     | C20H30O2    |
| FFA(22:0)           | 3.39E+02 | 3.40E+02 | [M-H]-     | C22H44O2    |
| FFA(22:1)           | 3.37E+02 | 3.38E+02 | [M-H]-     | C22H42O2    |
| FFA(22:2)           | 3.35E+02 | 3.36E+02 | [M-H]-     | C22H40O2    |
| FFA(22:4)           | 3.31E+02 | 3.32E+02 | [M-H]-     | C22H36O2    |
| FFA(22:5)           | 3.29E+02 | 3.30E+02 | [M-H]-     | C22H34O2    |
| FFA(22:6)           | 3.27E+02 | 3.28E+02 | [M-H]-     | C22H32O2    |
| FFA(24:4)           | 3.59E+02 | 3.60E+02 | [M-H]-     | C24H40O2    |
| FFA(24:5)           | 3.57E+02 | 3.58E+02 | [M-H]-     | C24H38O2    |
| FFA(24:6)           | 3.55E+02 | 3.56E+02 | [M-H]-     | C24H36O2    |
| FFA(29:0)           | 4.37E+02 | 4.38E+02 | [M-H]-     | C29H58O2    |
| FFA(32:1)           | 4.77E+02 | 4.78E+02 | [M-H]-     | C32H62O2    |
| FFA(34:1)           | 5.05E+02 | 5.07E+02 | [M-H]-     | C34H66O2    |
| Glycocholic acid    | 4.64E+02 | 4.65E+02 | [M-H]-     | C26H43NO6   |
| Hex2Cer(d18:1/16:0) | 8.45E+02 | 8.62E+02 | [M-H2O+H]+ | C46H87NO13  |
| Hex2Cer(d18:1/18:0) | 8.73E+02 | 8.90E+02 | [M-H2O+H]+ | C48H91NO13  |
| Hex2Cer(d18:1/20:0) | 9.01E+02 | 9.18E+02 | [M-H2O+H]+ | C50H95NO13  |
| Hex2Cer(d18:1/22:0) | 9.29E+02 | 9.46E+02 | [M-H2O+H]+ | C52H99NO13  |
| Hex2Cer(d18:1/24:0) | 9.57E+02 | 9.74E+02 | [M-H2O+H]+ | C54H103NO13 |
| Hex2Cer(d18:1/24:1) | 9.55E+02 | 9.72E+02 | [M-H2O+H]+ | C54H101NO13 |
| HexCer(d16:1/24:1)  | 6.03E+02 | 7.82E+02 | [M-H2O+H]+ | C46H87NO8   |
| HexCer(d16:1/26:1)  | 6.31E+02 | 8.10E+02 | [M-H2O+H]+ | C48H91NO8   |
| HexCer(d17:1/16:0)  | 5.06E+02 | 6.86E+02 | [M-H2O+H]+ | C39H75NO8   |
| HexCer(d17:1/18:0)  | 5.35E+02 | 7.14E+02 | [M-H2O+H]+ | C41H79NO8   |
| HexCer(d17:1/26:2)  | 6.43E+02 | 8.22E+02 | [M-H2O+H]+ | C49H91NO8   |
| HexCer(d18:1/16:0)  | 5.21E+02 | 7.00E+02 | [M-H2O+H]+ | C40H77NO8   |
| HexCer(d18:1/16:1)  | 5.18E+02 | 6.98E+02 | [M-H2O+H]+ | C40H75NO8   |



|                         |          |          |            |             |
|-------------------------|----------|----------|------------|-------------|
| HexCer(d18:1/17:0)      | 5.35E+02 | 7.14E+02 | [M-H2O+H]+ | C41H79NO8   |
| HexCer(d18:1/18:0)      | 5.49E+02 | 7.28E+02 | [M-H2O+H]+ | C42H81NO8   |
| HexCer(d18:1/18:1)      | 5.47E+02 | 7.26E+02 | [M-H2O+H]+ | C42H79NO8   |
| HexCer(d18:1/20:0)      | 5.77E+02 | 7.56E+02 | [M-H2O+H]+ | C44H85NO8   |
| HexCer(d18:1/20:1)      | 5.75E+02 | 7.54E+02 | [M-H2O+H]+ | C44H83NO8   |
| HexCer(d18:1/21:0)      | 5.91E+02 | 7.70E+02 | [M-H2O+H]+ | C45H87NO8   |
| HexCer(d18:1/22:0)      | 6.05E+02 | 7.84E+02 | [M-H2O+H]+ | C46H89NO8   |
| HexCer(d18:1/22:1)      | 6.03E+02 | 7.82E+02 | [M-H2O+H]+ | C46H87NO8   |
| HexCer(d18:1/22:2)      | 6.01E+02 | 7.80E+02 | [M-H2O+H]+ | C46H85NO8   |
| HexCer(d18:1/23:0)      | 6.19E+02 | 7.98E+02 | [M-H2O+H]+ | C47H91NO8   |
| HexCer(d18:1/23:1)      | 6.17E+02 | 7.96E+02 | [M-H2O+H]+ | C47H89NO8   |
| HexCer(d18:1/24:0)      | 6.33E+02 | 8.12E+02 | [M-H2O+H]+ | C48H93NO8   |
| HexCer(d18:1/24:1)      | 6.31E+02 | 8.10E+02 | [M-H2O+H]+ | C48H91NO8   |
| HexCer(d18:1/25:0)      | 6.47E+02 | 8.26E+02 | [M-H2O+H]+ | C49H95NO8   |
| HexCer(d18:1/25:1)      | 6.45E+02 | 8.24E+02 | [M-H2O+H]+ | C49H93NO8   |
| HexCer(d18:1/26:0)      | 6.61E+02 | 8.40E+02 | [M-H2O+H]+ | C50H97NO8   |
| HexCer(d18:1/26:2)      | 6.57E+02 | 8.36E+02 | [M-H2O+H]+ | C50H93NO8   |
| HexCer(d18:2/18:0)      | 5.47E+02 | 7.26E+02 | [M-H2O+H]+ | C42H79NO8   |
| HexCer(d18:2/20:0)      | 5.75E+02 | 7.54E+02 | [M-H2O+H]+ | C44H83NO8   |
| HexCer(d18:2/22:0)      | 6.03E+02 | 7.82E+02 | [M-H2O+H]+ | C46H87NO8   |
| HexCer(d18:2/24:0)      | 6.31E+02 | 8.10E+02 | [M-H2O+H]+ | C48H91NO8   |
| HexCer(d18:2/24:1)      | 6.29E+02 | 8.08E+02 | [M-H2O+H]+ | C48H89NO8   |
| HexCer(d18:2/26:0)      | 6.59E+02 | 8.38E+02 | [M-H2O+H]+ | C50H95NO8   |
| HexCer(d20:1/24:1)      | 6.59E+02 | 8.38E+02 | [M-H2O+H]+ | C50H95NO8   |
| HexCer(t14:0/24:2(2OH)) | 6.07E+02 | 7.86E+02 | [M-H2O+H]+ | C44H83NO10  |
| HexCer(t14:1/17:0(2OH)) | 5.10E+02 | 6.90E+02 | [M-H2O+H]+ | C37H71NO10  |
| HexCer(t14:1/24:0(2OH)) | 6.09E+02 | 7.88E+02 | [M-H2O+H]+ | C44H85NO10  |
| HexCer(t14:1/24:1(2OH)) | 6.07E+02 | 7.86E+02 | [M-H2O+H]+ | C44H83NO10  |
| HexCer(t15:0/16:2(2OH)) | 5.08E+02 | 6.87E+02 | [M-H2O+H]+ | C37H69NO10  |
| HexCer(t17:2/18:0(2OH)) | 5.64E+02 | 7.44E+02 | [M-H2O+H]+ | C41H77NO10  |
| HexCer(t17:2/34:2(2OH)) | 7.85E+02 | 9.64E+02 | [M-H2O+H]+ | C57H105NO10 |
| HexCer(t17:2/40:1(2OH)) | 8.71E+02 | 1.05E+03 | [M-H2O+H]+ | C63H119NO10 |
| HexCer(t17:2/42:1(2OH)) | 8.99E+02 | 1.08E+03 | [M-H2O+H]+ | C65H123NO10 |
| HexCer(t18:0/20:2(2OH)) | 6.07E+02 | 7.86E+02 | [M-H2O+H]+ | C44H83NO10  |
| HexCer(t18:1/20:0(2OH)) | 6.09E+02 | 7.88E+02 | [M-H2O+H]+ | C44H85NO10  |
| HexCer(t18:1/20:1(2OH)) | 6.07E+02 | 7.86E+02 | [M-H2O+H]+ | C44H83NO10  |
| HexCer(t18:2/20:0(2OH)) | 6.07E+02 | 7.86E+02 | [M-H2O+H]+ | C44H83NO10  |
| HexCer(t19:1/26:1(2OH)) | 7.05E+02 | 8.84E+02 | [M-H2O+H]+ | C51H97NO10  |
| HexCer(t20:1/20:0(2OH)) | 6.37E+02 | 8.16E+02 | [M-H2O+H]+ | C46H89NO10  |
| HexCer(t20:2/18:0(2OH)) | 6.07E+02 | 7.86E+02 | [M-H2O+H]+ | C44H83NO10  |
| HexCer(t22:1/16:1(2OH)) | 6.07E+02 | 7.86E+02 | [M-H2O+H]+ | C44H83NO10  |
| HexCer(t22:2/14:1(2OH)) | 5.76E+02 | 7.56E+02 | [M-H2O+H]+ | C42H77NO10  |
| HexCer(t22:2/15:1(2OH)) | 5.91E+02 | 7.70E+02 | [M-H2O+H]+ | C43H79NO10  |
| HexCer(t23:2/15:1(2OH)) | 6.05E+02 | 7.84E+02 | [M-H2O+H]+ | C44H81NO10  |
| HexCer(t26:0/19:1(2OH)) | 7.07E+02 | 8.86E+02 | [M-H2O+H]+ | C51H99NO10  |
| LNAPE(16:0/N-16:0)      | 6.91E+02 | 6.92E+02 | [M-H]-     | C37H74NO8P  |
| LNAPE(16:0/N-18:1)      | 7.17E+02 | 7.18E+02 | [M-H]-     | C39H76NO8P  |
| LNAPE(16:1/N-16:0)      | 6.88E+02 | 6.89E+02 | [M-H]-     | C37H72NO8P  |
| LNAPE(18:1/N-17:0)      | 7.31E+02 | 7.32E+02 | [M-H]-     | C40H78NO8P  |
| LNAPE(18:1/N-18:2)      | 7.41E+02 | 7.42E+02 | [M-H]-     | C41H76NO8P  |
| LNAPE(18:2/N-18:2)      | 7.39E+02 | 7.40E+02 | [M-H]-     | C41H74NO8P  |
| LNAPE(20:4/N-18:2)      | 7.63E+02 | 7.64E+02 | [M-H]-     | C43H74NO8P  |
| LNAPE(20:4/N-22:4)      | 8.15E+02 | 8.16E+02 | [M-H]-     | C47H78NO8P  |
| LNAPE(20:5/N-16:1)      | 7.34E+02 | 7.35E+02 | [M-H]-     | C41H70NO8P  |

|                    |          |          |        |            |
|--------------------|----------|----------|--------|------------|
| LNAPE(20:5/N-18:1) | 7.63E+02 | 7.64E+02 | [M-H]- | C43H74NO8P |
| LNAPE(20:5/N-18:2) | 7.60E+02 | 7.61E+02 | [M-H]- | C43H72NO8P |
| LNAPE(22:5/N-20:2) | 8.17E+02 | 8.18E+02 | [M-H]- | C47H80NO8P |
| LNAPE(22:6/N-18:2) | 7.87E+02 | 7.88E+02 | [M-H]- | C45H74NO8P |
| LNAPE(22:6/N-20:1) | 8.17E+02 | 8.18E+02 | [M-H]- | C47H80NO8P |
| LNAPE(22:6/N-20:3) | 8.13E+02 | 8.14E+02 | [M-H]- | C47H76NO8P |
| LNAPE(22:6/N-20:4) | 8.11E+02 | 8.12E+02 | [M-H]- | C47H74NO8P |
| LNAPE(24:5/N-18:0) | 8.21E+02 | 8.22E+02 | [M-H]- | C47H84NO8P |
| LPA(0:0/16:0)      | 4.09E+02 | 4.10E+02 | [M-H]- | C19H39O7P  |
| LPA(0:0/18:0)      | 4.37E+02 | 4.38E+02 | [M-H]- | C21H43O7P  |
| LPA(0:0/18:2)      | 4.33E+02 | 4.34E+02 | [M-H]- | C21H39O7P  |
| LPA(0:0/20:4)      | 4.57E+02 | 4.58E+02 | [M-H]- | C23H39O7P  |
| LPA(0:0/22:6)      | 4.81E+02 | 4.82E+02 | [M-H]- | C25H39O7P  |
| LPA(22:5)          | 4.83E+02 | 4.82E+02 | [M-H]- | C25H39O7P  |
| LPC(0:0/15:0)      | 4.82E+02 | 4.81E+02 | [M+H]+ | C23H48NO7P |
| LPC(0:0/16:0)      | 4.96E+02 | 4.95E+02 | [M+H]+ | C24H50NO7P |
| LPC(0:0/17:0)      | 5.10E+02 | 5.09E+02 | [M+H]+ | C25H52NO7P |
| LPC(0:0/18:0)      | 5.24E+02 | 5.23E+02 | [M+H]+ | C26H54NO7P |
| LPC(0:0/18:1)      | 5.22E+02 | 5.21E+02 | [M+H]+ | C26H52NO7P |
| LPC(0:0/18:2)      | 5.20E+02 | 5.19E+02 | [M+H]+ | C26H50NO7P |
| LPC(0:0/19:0)      | 5.38E+02 | 5.37E+02 | [M+H]+ | C27H56NO7P |
| LPC(0:0/20:0)      | 5.52E+02 | 5.51E+02 | [M+H]+ | C28H58NO7P |
| LPC(0:0/20:1)      | 5.50E+02 | 5.49E+02 | [M+H]+ | C28H56NO7P |
| LPC(0:0/20:2)      | 5.48E+02 | 5.47E+02 | [M+H]+ | C28H54NO7P |
| LPC(0:0/22:1)      | 5.78E+02 | 5.77E+02 | [M+H]+ | C30H60NO7P |
| LPC(0:0/22:4)      | 5.72E+02 | 5.71E+02 | [M+H]+ | C30H54NO7P |
| LPC(0:0/22:5)      | 5.70E+02 | 5.69E+02 | [M+H]+ | C30H52NO7P |
| LPC(14:0/0:0)      | 4.68E+02 | 4.67E+02 | [M+H]+ | C22H46NO7P |
| LPC(15:0/0:0)      | 4.82E+02 | 4.81E+02 | [M+H]+ | C23H48NO7P |
| LPC(16:0/0:0)      | 4.96E+02 | 4.95E+02 | [M+H]+ | C24H50NO7P |
| LPC(16:1/0:0)      | 4.94E+02 | 4.93E+02 | [M+H]+ | C24H48NO7P |
| LPC(16:2)          | 4.92E+02 | 4.91E+02 | [M+H]+ | C24H46NO7P |
| LPC(16:3)          | 4.90E+02 | 4.89E+02 | [M+H]+ | C24H44NO7P |
| LPC(17:0/0:0)      | 5.10E+02 | 5.09E+02 | [M+H]+ | C25H52NO7P |
| LPC(17:1/0:0)      | 5.08E+02 | 5.07E+02 | [M+H]+ | C25H50NO7P |
| LPC(18:0/0:0)      | 5.24E+02 | 5.23E+02 | [M+H]+ | C26H54NO7P |
| LPC(18:1/0:0)      | 5.22E+02 | 5.21E+02 | [M+H]+ | C26H52NO7P |
| LPC(18:2/0:0)      | 5.20E+02 | 5.19E+02 | [M+H]+ | C26H50NO7P |
| LPC(18:3/0:0)      | 5.18E+02 | 5.17E+02 | [M+H]+ | C26H48NO7P |
| LPC(18:4/0:0)      | 5.16E+02 | 5.15E+02 | [M+H]+ | C26H46NO7P |
| LPC(19:0/0:0)      | 5.38E+02 | 5.37E+02 | [M+H]+ | C27H56NO7P |
| LPC(19:1/0:0)      | 5.36E+02 | 5.35E+02 | [M+H]+ | C27H54NO7P |
| LPC(20:0/0:0)      | 5.52E+02 | 5.51E+02 | [M+H]+ | C28H58NO7P |
| LPC(20:1/0:0)      | 5.50E+02 | 5.49E+02 | [M+H]+ | C28H56NO7P |
| LPC(20:2/0:0)      | 5.48E+02 | 5.47E+02 | [M+H]+ | C28H54NO7P |
| LPC(20:3/0:0)      | 5.46E+02 | 5.45E+02 | [M+H]+ | C28H52NO7P |
| LPC(20:4/0:0)      | 5.44E+02 | 5.43E+02 | [M+H]+ | C28H50NO7P |
| LPC(20:5/0:0)      | 5.42E+02 | 5.41E+02 | [M+H]+ | C28H48NO7P |
| LPC(22:0/0:0)      | 5.80E+02 | 5.79E+02 | [M+H]+ | C30H62NO7P |
| LPC(22:1/0:0)      | 5.78E+02 | 5.77E+02 | [M+H]+ | C30H60NO7P |
| LPC(22:2/0:0)      | 5.76E+02 | 5.75E+02 | [M+H]+ | C30H58NO7P |
| LPC(22:4/0:0)      | 5.72E+02 | 5.71E+02 | [M+H]+ | C30H54NO7P |
| LPC(22:5/0:0)      | 5.70E+02 | 5.69E+02 | [M+H]+ | C30H52NO7P |
| LPC(22:6/0:0)      | 5.68E+02 | 5.67E+02 | [M+H]+ | C30H50NO7P |

|               |          |          |                    |            |
|---------------|----------|----------|--------------------|------------|
| LPC(24:0/0:0) | 6.08E+02 | 6.07E+02 | [M+H] <sup>+</sup> | C32H66NO7P |
| LPC(24:1/0:0) | 6.06E+02 | 6.05E+02 | [M+H] <sup>+</sup> | C32H64NO7P |
| LPC(24:2)     | 6.04E+02 | 6.03E+02 | [M+H] <sup>+</sup> | C32H62NO7P |
| LPC(26:0/0:0) | 6.36E+02 | 6.35E+02 | [M+H] <sup>+</sup> | C34H70NO7P |
| LPC(O-14:0)   | 4.54E+02 | 4.53E+02 | [M+H] <sup>+</sup> | C22H48NO6P |
| LPC(O-14:1)   | 4.52E+02 | 4.51E+02 | [M+H] <sup>+</sup> | C22H46NO6P |
| LPC(O-16:0)   | 4.82E+02 | 4.81E+02 | [M+H] <sup>+</sup> | C24H52NO6P |
| LPC(O-16:1)   | 4.80E+02 | 4.79E+02 | [M+H] <sup>+</sup> | C24H50NO6P |
| LPC(O-18:0)   | 5.10E+02 | 5.09E+02 | [M+H] <sup>+</sup> | C26H56NO6P |
| LPC(O-18:1)   | 5.08E+02 | 5.07E+02 | [M+H] <sup>+</sup> | C26H54NO6P |
| LPC(O-18:2)   | 5.06E+02 | 5.05E+02 | [M+H] <sup>+</sup> | C26H52NO6P |
| LPC(O-20:0)   | 5.38E+02 | 5.37E+02 | [M+H] <sup>+</sup> | C28H60NO6P |
| LPC(O-20:1)   | 5.36E+02 | 5.35E+02 | [M+H] <sup>+</sup> | C28H58NO6P |
| LPC(O-20:2)   | 5.34E+02 | 5.33E+02 | [M+H] <sup>+</sup> | C28H56NO6P |
| LPC(O-20:3)   | 5.32E+02 | 5.31E+02 | [M+H] <sup>+</sup> | C28H54NO6P |
| LPC(O-22:0)   | 5.66E+02 | 5.65E+02 | [M+H] <sup>+</sup> | C30H64NO6P |
| LPC(O-22:1)   | 5.64E+02 | 5.63E+02 | [M+H] <sup>+</sup> | C30H62NO6P |
| LPC(O-22:2)   | 5.62E+02 | 5.61E+02 | [M+H] <sup>+</sup> | C30H60NO6P |
| LPC(O-24:0)   | 5.94E+02 | 5.93E+02 | [M+H] <sup>+</sup> | C32H68NO6P |
| LPC(O-24:1)   | 5.92E+02 | 5.91E+02 | [M+H] <sup>+</sup> | C32H66NO6P |
| LPE(0:0/16:0) | 4.54E+02 | 4.53E+02 | [M+H] <sup>+</sup> | C21H44NO7P |
| LPE(0:0/18:0) | 4.82E+02 | 4.81E+02 | [M+H] <sup>+</sup> | C23H48NO7P |
| LPE(0:0/18:1) | 4.80E+02 | 4.79E+02 | [M+H] <sup>+</sup> | C23H46NO7P |
| LPE(0:0/18:2) | 4.78E+02 | 4.77E+02 | [M+H] <sup>+</sup> | C23H44NO7P |
| LPE(0:0/20:1) | 5.08E+02 | 5.07E+02 | [M+H] <sup>+</sup> | C25H50NO7P |
| LPE(0:0/20:2) | 5.06E+02 | 5.05E+02 | [M+H] <sup>+</sup> | C25H48NO7P |
| LPE(0:0/20:3) | 5.04E+02 | 5.03E+02 | [M+H] <sup>+</sup> | C25H46NO7P |
| LPE(0:0/22:5) | 5.28E+02 | 5.27E+02 | [M+H] <sup>+</sup> | C27H46NO7P |
| LPE(16:0/0:0) | 4.54E+02 | 4.53E+02 | [M+H] <sup>+</sup> | C21H44NO7P |
| LPE(16:1/0:0) | 4.52E+02 | 4.51E+02 | [M+H] <sup>+</sup> | C21H42NO7P |
| LPE(17:0/0:0) | 4.68E+02 | 4.67E+02 | [M+H] <sup>+</sup> | C22H46NO7P |
| LPE(17:1/0:0) | 4.66E+02 | 4.65E+02 | [M+H] <sup>+</sup> | C22H44NO7P |
| LPE(18:0/0:0) | 4.82E+02 | 4.81E+02 | [M+H] <sup>+</sup> | C23H48NO7P |
| LPE(18:1/0:0) | 4.80E+02 | 4.79E+02 | [M+H] <sup>+</sup> | C23H46NO7P |
| LPE(18:2/0:0) | 4.78E+02 | 4.77E+02 | [M+H] <sup>+</sup> | C23H44NO7P |
| LPE(18:3/0:0) | 4.76E+02 | 4.75E+02 | [M+H] <sup>+</sup> | C23H42NO7P |
| LPE(19:0)     | 4.96E+02 | 4.95E+02 | [M+H] <sup>+</sup> | C24H50NO7P |
| LPE(20:0/0:0) | 5.10E+02 | 5.09E+02 | [M+H] <sup>+</sup> | C25H52NO7P |
| LPE(20:1/0:0) | 5.08E+02 | 5.07E+02 | [M+H] <sup>+</sup> | C25H50NO7P |
| LPE(20:2/0:0) | 5.06E+02 | 5.05E+02 | [M+H] <sup>+</sup> | C25H48NO7P |
| LPE(20:3/0:0) | 5.04E+02 | 5.31E+02 | [M+H] <sup>+</sup> | C27H50NO7P |
| LPE(20:4/0:0) | 5.02E+02 | 5.01E+02 | [M+H] <sup>+</sup> | C25H44NO7P |
| LPE(20:5/0:0) | 5.00E+02 | 4.99E+02 | [M+H] <sup>+</sup> | C25H42NO7P |
| LPE(22:1/0:0) | 5.36E+02 | 5.35E+02 | [M+H] <sup>+</sup> | C27H54NO7P |
| LPE(22:2/0:0) | 5.34E+02 | 5.33E+02 | [M+H] <sup>+</sup> | C27H52NO7P |
| LPE(22:3/0:0) | 5.32E+02 | 5.31E+02 | [M+H] <sup>+</sup> | C27H50NO7P |
| LPE(22:4/0:0) | 5.30E+02 | 5.29E+02 | [M+H] <sup>+</sup> | C27H48NO7P |
| LPE(22:5/0:0) | 5.28E+02 | 5.27E+02 | [M+H] <sup>+</sup> | C27H46NO7P |
| LPE(22:6/0:0) | 5.26E+02 | 5.25E+02 | [M+H] <sup>+</sup> | C27H44NO7P |
| LPE(P-16:0)   | 4.38E+02 | 4.37E+02 | [M+H] <sup>+</sup> | C21H44NO6P |
| LPE(P-17:0)   | 4.52E+02 | 4.51E+02 | [M+H] <sup>+</sup> | C22H46NO6P |
| LPE(P-18:0)   | 4.66E+02 | 4.65E+02 | [M+H] <sup>+</sup> | C23H48NO6P |
| LPE(P-18:1)   | 4.64E+02 | 4.63E+02 | [M+H] <sup>+</sup> | C23H46NO6P |
| LPE(P-20:0)   | 4.94E+02 | 4.93E+02 | [M+H] <sup>+</sup> | C25H52NO6P |

|                 |          |          |          |            |
|-----------------|----------|----------|----------|------------|
| LPG(16:0/0:0)   | 4.83E+02 | 4.84E+02 | [M-H]-   | C22H45O9P  |
| LPG(16:1/0:0)   | 4.81E+02 | 4.82E+02 | [M-H]-   | C22H43O9P  |
| LPG(18:0/0:0)   | 5.11E+02 | 5.12E+02 | [M-H]-   | C24H49O9P  |
| LPG(18:1/0:0)   | 5.09E+02 | 5.10E+02 | [M-H]-   | C24H47O9P  |
| LPG(18:2/0:0)   | 5.07E+02 | 5.08E+02 | [M-H]-   | C24H45O9P  |
| LPG(18:3)       | 5.05E+02 | 5.06E+02 | [M-H]-   | C24H43O9P  |
| LPG(20:2)       | 5.35E+02 | 5.36E+02 | [M-H]-   | C26H49O9P  |
| LPG(20:3)       | 5.33E+02 | 5.34E+02 | [M-H]-   | C26H47O9P  |
| LPG(20:4/0:0)   | 5.31E+02 | 5.32E+02 | [M-H]-   | C26H45O9P  |
| LPG(22:4)       | 5.59E+02 | 5.60E+02 | [M-H]-   | C28H49O9P  |
| LPG(22:5/0:0)   | 5.55E+02 | 5.58E+02 | [M-H]-   | C28H47O9P  |
| LPI(16:0/0:0)   | 5.71E+02 | 5.72E+02 | [M-H]-   | C25H49O12P |
| LPI(17:0)       | 5.85E+02 | 5.86E+02 | [M-H]-   | C26H51O12P |
| LPI(18:0/0:0)   | 5.99E+02 | 6.00E+02 | [M-H]-   | C27H53O12P |
| LPI(18:1/0:0)   | 5.97E+02 | 5.98E+02 | [M-H]-   | C27H51O12P |
| LPI(18:2/0:0)   | 5.95E+02 | 5.96E+02 | [M-H]-   | C27H49O12P |
| LPI(19:0)       | 6.13E+02 | 6.14E+02 | [M-H]-   | C28H55O12P |
| LPI(20:1)       | 6.25E+02 | 6.26E+02 | [M-H]-   | C29H55O12P |
| LPI(20:3/0:0)   | 6.21E+02 | 6.22E+02 | [M-H]-   | C29H51O12P |
| LPI(20:4/0:0)   | 6.19E+02 | 6.20E+02 | [M-H]-   | C29H49O12P |
| LPS(18:0/0:0)   | 5.24E+02 | 5.25E+02 | [M-H]-   | C24H48NO9P |
| LPS(18:1/0:0)   | 5.22E+02 | 5.23E+02 | [M-H]-   | C24H46NO9P |
| LPS(18:2/0:0)   | 5.20E+02 | 5.21E+02 | [M-H]-   | C24H44NO9P |
| LPS(20:3/0:0)   | 5.46E+02 | 5.47E+02 | [M-H]-   | C26H46NO9P |
| LPS(20:4/0:0)   | 5.44E+02 | 5.45E+02 | [M-H]-   | C26H44NO9P |
| LPS(20:5/0:0)   | 5.42E+02 | 5.43E+02 | [M-H]-   | C26H42NO9P |
| LPS(22:5/0:0)   | 5.70E+02 | 5.71E+02 | [M-H]-   | C28H46NO9P |
| LPS(22:6/0:0)   | 5.68E+02 | 5.69E+02 | [M-H]-   | C28H44NO9P |
| MG(16:0)        | 3.48E+02 | 3.30E+02 | [M+NH4]+ | C19H38O4   |
| MG(18:0)        | 3.76E+02 | 3.58E+02 | [M+NH4]+ | C21H42O4   |
| MG(18:1)        | 3.74E+02 | 3.56E+02 | [M+NH4]+ | C21H40O4   |
| MG(18:2)        | 3.72E+02 | 3.54E+02 | [M+NH4]+ | C21H38O4   |
| MG(20:4)        | 3.96E+02 | 3.78E+02 | [M+NH4]+ | C23H38O4   |
| MGDG(14:0_16:0) | 7.21E+02 | 7.03E+02 | [M+NH4]+ | C39H74O10  |
| MGDG(14:0_18:0) | 7.49E+02 | 7.31E+02 | [M+NH4]+ | C41H78O10  |
| MGDG(14:0_18:2) | 7.45E+02 | 7.27E+02 | [M+NH4]+ | C41H74O10  |
| MGDG(16:0_16:0) | 7.49E+02 | 7.31E+02 | [M+NH4]+ | C41H78O10  |
| MGDG(16:0_16:1) | 7.47E+02 | 7.29E+02 | [M+NH4]+ | C41H76O10  |
| MGDG(16:0_16:2) | 7.45E+02 | 7.27E+02 | [M+NH4]+ | C41H74O10  |
| MGDG(16:0_18:1) | 7.75E+02 | 7.57E+02 | [M+NH4]+ | C43H80O10  |
| MGDG(16:1_18:1) | 7.73E+02 | 7.55E+02 | [M+NH4]+ | C43H78O10  |
| MGDG(18:1_16:2) | 7.71E+02 | 7.53E+02 | [M+NH4]+ | C43H76O10  |
| MGDG(18:1_18:1) | 8.01E+02 | 7.83E+02 | [M+NH4]+ | C45H82O10  |
| PA(10:0_20:4)   | 6.11E+02 | 6.12E+02 | [M-H]-   | C33H57O8P  |
| PA(12:0_12:0)   | 5.35E+02 | 5.36E+02 | [M-H]-   | C27H53O8P  |
| PA(12:0_18:4)   | 6.11E+02 | 6.12E+02 | [M-H]-   | C33H57O8P  |
| PA(12:0_20:5)   | 6.37E+02 | 6.38E+02 | [M-H]-   | C35H59O8P  |
| PA(12:0_22:4)   | 6.67E+02 | 6.68E+02 | [M-H]-   | C37H65O8P  |
| PA(12:0_22:6)   | 6.63E+02 | 6.64E+02 | [M-H]-   | C37H61O8P  |
| PA(16:0_16:0)   | 6.47E+02 | 6.48E+02 | [M-H]-   | C35H69O8P  |
| PA(16:0_18:0)   | 6.75E+02 | 6.77E+02 | [M-H]-   | C37H73O8P  |
| PA(16:0_18:1)   | 6.73E+02 | 6.74E+02 | [M-H]-   | C37H71O8P  |
| PA(16:0_20:1)   | 7.02E+02 | 7.03E+02 | [M-H]-   | C39H75O8P  |
| PA(16:0_20:2)   | 6.99E+02 | 7.01E+02 | [M-H]-   | C39H73O8P  |

|               |          |          |           |            |
|---------------|----------|----------|-----------|------------|
| PA(16:0_20:4) | 6.95E+02 | 6.96E+02 | [M-H]-    | C39H69O8P  |
| PA(16:0_22:5) | 7.21E+02 | 7.22E+02 | [M-H]-    | C41H71O8P  |
| PA(16:1_22:5) | 7.19E+02 | 7.20E+02 | [M-H]-    | C41H69O8P  |
| PA(18:0_18:1) | 7.02E+02 | 7.03E+02 | [M-H]-    | C39H75O8P  |
| PA(18:0_20:3) | 7.26E+02 | 7.27E+02 | [M-H]-    | C41H75O8P  |
| PA(18:0_20:4) | 7.23E+02 | 7.25E+02 | [M-H]-    | C41H73O8P  |
| PA(18:0_21:0) | 7.46E+02 | 7.47E+02 | [M-H]-    | C42H83O8P  |
| PA(18:0_22:4) | 7.52E+02 | 7.53E+02 | [M-H]-    | C43H77O8P  |
| PA(18:0_22:5) | 7.50E+02 | 7.51E+02 | [M-H]-    | C43H75O8P  |
| PA(18:0_22:6) | 7.47E+02 | 7.49E+02 | [M-H]-    | C43H73O8P  |
| PA(18:1_16:3) | 6.67E+02 | 6.68E+02 | [M-H]-    | C37H65O8P  |
| PA(18:1_18:1) | 6.99E+02 | 7.01E+02 | [M-H]-    | C39H73O8P  |
| PA(18:1_18:2) | 6.97E+02 | 6.98E+02 | [M-H]-    | C39H71O8P  |
| PA(18:1_20:2) | 7.26E+02 | 7.27E+02 | [M-H]-    | C41H75O8P  |
| PA(18:1_22:6) | 7.45E+02 | 7.46E+02 | [M-H]-    | C43H71O8P  |
| PA(18:1_26:1) | 8.12E+02 | 8.13E+02 | [M-H]-    | C47H89O8P  |
| PA(18:2_18:2) | 6.95E+02 | 6.96E+02 | [M-H]-    | C39H69O8P  |
| PA(20:0_18:2) | 7.28E+02 | 7.29E+02 | [M-H]-    | C41H77O8P  |
| PA(20:0_20:4) | 7.52E+02 | 7.53E+02 | [M-H]-    | C43H77O8P  |
| PA(20:0_21:0) | 7.74E+02 | 7.75E+02 | [M-H]-    | C44H87O8P  |
| PA(20:0_22:4) | 7.80E+02 | 7.81E+02 | [M-H]-    | C45H81O8P  |
| PA(20:0_22:6) | 7.76E+02 | 7.77E+02 | [M-H]-    | C45H77O8P  |
| PA(20:1_18:2) | 7.26E+02 | 7.27E+02 | [M-H]-    | C41H75O8P  |
| PA(20:1_20:3) | 7.52E+02 | 7.53E+02 | [M-H]-    | C43H77O8P  |
| PA(20:1_20:4) | 7.50E+02 | 7.51E+02 | [M-H]-    | C43H75O8P  |
| PA(20:1_20:5) | 7.47E+02 | 7.49E+02 | [M-H]-    | C43H73O8P  |
| PA(20:1_22:4) | 7.78E+02 | 7.79E+02 | [M-H]-    | C45H79O8P  |
| PA(20:1_22:5) | 7.76E+02 | 7.77E+02 | [M-H]-    | C45H77O8P  |
| PA(20:2_20:4) | 7.47E+02 | 7.49E+02 | [M-H]-    | C43H73O8P  |
| PA(20:2_22:5) | 7.74E+02 | 7.75E+02 | [M-H]-    | C45H75O8P  |
| PA(20:3_22:5) | 7.71E+02 | 7.73E+02 | [M-H]-    | C45H73O8P  |
| PA(20:4_22:5) | 7.69E+02 | 7.70E+02 | [M-H]-    | C45H71O8P  |
| PA(21:0_22:0) | 8.02E+02 | 8.03E+02 | [M-H]-    | C46H91O8P  |
| PA(21:0_24:1) | 8.28E+02 | 8.29E+02 | [M-H]-    | C48H93O8P  |
| PA(22:1_18:2) | 7.54E+02 | 7.55E+02 | [M-H]-    | C43H79O8P  |
| PA(22:1_20:4) | 7.78E+02 | 7.79E+02 | [M-H]-    | C45H79O8P  |
| PA(24:0_20:2) | 8.12E+02 | 8.13E+02 | [M-H]-    | C47H89O8P  |
| PC(10:0_18:0) | 7.22E+02 | 6.77E+02 | [M+COOH]- | C36H72NO8P |
| PC(12:0_14:1) | 6.92E+02 | 6.47E+02 | [M+COOH]- | C34H66NO8P |
| PC(12:0_16:0) | 7.22E+02 | 6.77E+02 | [M+COOH]- | C36H72NO8P |
| PC(12:0_20:1) | 7.77E+02 | 7.32E+02 | [M+COOH]- | C40H78NO8P |
| PC(12:0_22:4) | 7.99E+02 | 7.54E+02 | [M+COOH]- | C42H76NO8P |
| PC(13:0_14:0) | 7.08E+02 | 6.63E+02 | [M+COOH]- | C35H70NO8P |
| PC(13:0_16:0) | 7.37E+02 | 6.92E+02 | [M+COOH]- | C37H74NO8P |
| PC(13:0_16:1) | 7.34E+02 | 6.89E+02 | [M+COOH]- | C37H72NO8P |
| PC(13:0_18:0) | 7.65E+02 | 7.20E+02 | [M+COOH]- | C39H78NO8P |
| PC(13:0_18:1) | 7.63E+02 | 7.18E+02 | [M+COOH]- | C39H76NO8P |
| PC(14:0_14:0) | 6.79E+02 | 6.77E+02 | [M+H]+    | C36H72NO8P |
| PC(14:0_15:1) | 7.34E+02 | 6.89E+02 | [M+COOH]- | C37H72NO8P |
| PC(14:0_16:1) | 7.49E+02 | 7.04E+02 | [M+COOH]- | C38H74NO8P |
| PC(14:0_17:1) | 7.63E+02 | 7.18E+02 | [M+COOH]- | C39H76NO8P |
| PC(14:0_18:1) | 7.77E+02 | 7.32E+02 | [M+COOH]- | C40H78NO8P |
| PC(14:0_18:2) | 7.31E+02 | 7.30E+02 | [M+H]+    | C40H76NO8P |
| PC(14:0_18:3) | 7.29E+02 | 7.28E+02 | [M+H]+    | C40H74NO8P |

|               |          |          |                       |             |
|---------------|----------|----------|-----------------------|-------------|
| PC(14:0_20:4) | 7.55E+02 | 7.54E+02 | [M+H] <sup>+</sup>    | C42H76NO8P  |
| PC(14:0_20:5) | 7.53E+02 | 7.52E+02 | [M+H] <sup>+</sup>    | C42H74NO8P  |
| PC(14:0_22:6) | 8.23E+02 | 7.78E+02 | [M+COOH] <sup>-</sup> | C44H76NO8P  |
| PC(14:1_16:1) | 7.46E+02 | 7.01E+02 | [M+COOH] <sup>-</sup> | C38H72NO8P  |
| PC(14:1_18:1) | 7.75E+02 | 7.30E+02 | [M+COOH] <sup>-</sup> | C40H76NO8P  |
| PC(14:1_18:2) | 7.73E+02 | 7.28E+02 | [M+COOH] <sup>-</sup> | C40H74NO8P  |
| PC(14:1_20:4) | 7.97E+02 | 7.52E+02 | [M+COOH] <sup>-</sup> | C42H74NO8P  |
| PC(14:1_22:4) | 8.25E+02 | 7.80E+02 | [M+COOH] <sup>-</sup> | C44H78NO8P  |
| PC(14:1_22:6) | 8.21E+02 | 7.76E+02 | [M+COOH] <sup>-</sup> | C44H74NO8P  |
| PC(15:0_15:1) | 7.49E+02 | 7.04E+02 | [M+COOH] <sup>-</sup> | C38H74NO8P  |
| PC(15:0_16:0) | 7.21E+02 | 7.20E+02 | [M+H] <sup>+</sup>    | C39H78NO8P  |
| PC(15:0_16:1) | 7.19E+02 | 7.18E+02 | [M+H] <sup>+</sup>    | C39H76NO8P  |
| PC(15:0_17:1) | 7.77E+02 | 7.32E+02 | [M+COOH] <sup>-</sup> | C40H78NO8P  |
| PC(15:0_18:0) | 7.93E+02 | 7.48E+02 | [M+COOH] <sup>-</sup> | C41H82NO8P  |
| PC(15:0_18:1) | 7.91E+02 | 7.46E+02 | [M+COOH] <sup>-</sup> | C41H80NO8P  |
| PC(15:0_20:4) | 7.69E+02 | 7.68E+02 | [M+H] <sup>+</sup>    | C43H78NO8P  |
| PC(15:0_20:5) | 7.67E+02 | 7.66E+02 | [M+H] <sup>+</sup>    | C43H76NO8P  |
| PC(15:1_16:1) | 7.61E+02 | 7.16E+02 | [M+COOH] <sup>-</sup> | C39H74NO8P  |
| PC(15:1_17:1) | 7.75E+02 | 7.30E+02 | [M+COOH] <sup>-</sup> | C40H76NO8P  |
| PC(15:1_18:1) | 7.89E+02 | 7.44E+02 | [M+COOH] <sup>-</sup> | C41H78NO8P  |
| PC(15:1_18:2) | 7.87E+02 | 7.42E+02 | [M+COOH] <sup>-</sup> | C41H76NO8P  |
| PC(15:1_20:1) | 8.17E+02 | 7.72E+02 | [M+COOH] <sup>-</sup> | C43H82NO8P  |
| PC(15:1_20:4) | 8.11E+02 | 7.66E+02 | [M+COOH] <sup>-</sup> | C43H76NO8P  |
| PC(15:1_22:4) | 8.39E+02 | 7.94E+02 | [M+COOH] <sup>-</sup> | C45H80NO8P  |
| PC(15:1_22:5) | 7.93E+02 | 7.92E+02 | [M+H] <sup>+</sup>    | C45H78NO8P  |
| PC(16:0_14:0) | 7.07E+02 | 7.06E+02 | [M+H] <sup>+</sup>    | C38H76NO8P  |
| PC(16:0_16:0) | 7.79E+02 | 7.34E+02 | [M+COOH] <sup>-</sup> | C40H80NO8P  |
| PC(16:0_16:1) | 7.33E+02 | 7.32E+02 | [M+H] <sup>+</sup>    | C40H78NO8P  |
| PC(16:0_17:0) | 7.93E+02 | 7.48E+02 | [M+COOH] <sup>-</sup> | C41H82NO8P  |
| PC(16:0_17:1) | 7.91E+02 | 7.46E+02 | [M+COOH] <sup>-</sup> | C41H80NO8P  |
| PC(16:0_18:0) | 7.63E+02 | 7.62E+02 | [M+H] <sup>+</sup>    | C42H84NO8P  |
| PC(16:0_18:1) | 7.61E+02 | 7.60E+02 | [M+H] <sup>+</sup>    | C42H82NO8P  |
| PC(16:0_18:2) | 7.59E+02 | 7.58E+02 | [M+H] <sup>+</sup>    | C42H80NO8P  |
| PC(16:0_18:3) | 7.57E+02 | 7.56E+02 | [M+H] <sup>+</sup>    | C42H78NO8P  |
| PC(16:0_20:1) | 8.33E+02 | 7.88E+02 | [M+COOH] <sup>-</sup> | C44H86NO8P  |
| PC(16:0_20:2) | 8.31E+02 | 7.86E+02 | [M+COOH] <sup>-</sup> | C44H84NO8P  |
| PC(16:0_20:3) | 7.85E+02 | 7.84E+02 | [M+H] <sup>+</sup>    | C44H82NO8P  |
| PC(16:0_20:4) | 8.27E+02 | 7.82E+02 | [M+COOH] <sup>-</sup> | C44H80NO8P  |
| PC(16:0_20:5) | 7.81E+02 | 7.80E+02 | [M+H] <sup>+</sup>    | C44H78NO8P  |
| PC(16:0_22:0) | 8.63E+02 | 8.18E+02 | [M+COOH] <sup>-</sup> | C46H92NO8P  |
| PC(16:0_22:1) | 8.61E+02 | 8.16E+02 | [M+COOH] <sup>-</sup> | C46H90NO8P  |
| PC(16:0_22:5) | 8.09E+02 | 8.08E+02 | [M+H] <sup>+</sup>    | C46H82NO8P  |
| PC(16:0_22:6) | 8.07E+02 | 8.06E+02 | [M+H] <sup>+</sup>    | C46H80NO8P  |
| PC(16:0_24:0) | 8.47E+02 | 8.46E+02 | [M+H] <sup>+</sup>    | C48H96NO8P  |
| PC(16:0_26:0) | 9.19E+02 | 8.74E+02 | [M+COOH] <sup>-</sup> | C50H100NO8P |
| PC(16:1_16:1) | 7.75E+02 | 7.30E+02 | [M+COOH] <sup>-</sup> | C40H76NO8P  |
| PC(16:1_17:1) | 7.89E+02 | 7.44E+02 | [M+COOH] <sup>-</sup> | C41H78NO8P  |
| PC(16:1_18:1) | 8.03E+02 | 7.58E+02 | [M+COOH] <sup>-</sup> | C42H80NO8P  |
| PC(16:1_18:2) | 8.01E+02 | 7.56E+02 | [M+COOH] <sup>-</sup> | C42H78NO8P  |
| PC(16:1_18:3) | 7.99E+02 | 7.54E+02 | [M+COOH] <sup>-</sup> | C42H76NO8P  |
| PC(16:1_19:2) | 8.15E+02 | 7.70E+02 | [M+COOH] <sup>-</sup> | C43H80NO8P  |
| PC(16:1_22:6) | 8.05E+02 | 8.04E+02 | [M+H] <sup>+</sup>    | C46H78NO8P  |
| PC(17:0_15:1) | 7.77E+02 | 7.32E+02 | [M+COOH] <sup>-</sup> | C40H78NO8P  |
| PC(17:0_16:1) | 7.91E+02 | 7.46E+02 | [M+COOH] <sup>-</sup> | C41H80NO8P  |

|               |          |          |           |            |
|---------------|----------|----------|-----------|------------|
| PC(17:0_18:1) | 8.19E+02 | 7.74E+02 | [M+COOH]- | C43H84NO8P |
| PC(17:0_18:2) | 8.17E+02 | 7.72E+02 | [M+COOH]- | C43H82NO8P |
| PC(17:0_20:3) | 8.43E+02 | 7.98E+02 | [M+COOH]- | C45H84NO8P |
| PC(17:0_20:5) | 8.39E+02 | 7.94E+02 | [M+COOH]- | C45H80NO8P |
| PC(17:1_18:1) | 8.17E+02 | 7.72E+02 | [M+COOH]- | C43H82NO8P |
| PC(17:1_18:2) | 7.71E+02 | 7.70E+02 | [M+H]+    | C43H80NO8P |
| PC(17:1_20:4) | 7.95E+02 | 7.94E+02 | [M+H]+    | C45H80NO8P |
| PC(18:0_12:0) | 7.51E+02 | 7.06E+02 | [M+COOH]- | C38H76NO8P |
| PC(18:0_15:1) | 7.91E+02 | 7.46E+02 | [M+COOH]- | C41H80NO8P |
| PC(18:0_18:0) | 8.35E+02 | 7.90E+02 | [M+COOH]- | C44H88NO8P |
| PC(18:0_18:1) | 7.89E+02 | 7.88E+02 | [M+H]+    | C44H86NO8P |
| PC(18:0_18:2) | 7.87E+02 | 7.86E+02 | [M+H]+    | C44H84NO8P |
| PC(18:0_20:2) | 8.15E+02 | 8.14E+02 | [M+H]+    | C46H88NO8P |
| PC(18:0_20:3) | 8.57E+02 | 8.12E+02 | [M+COOH]- | C46H86NO8P |
| PC(18:0_20:4) | 8.11E+02 | 8.10E+02 | [M+H]+    | C46H84NO8P |
| PC(18:0_22:1) | 8.89E+02 | 8.44E+02 | [M+COOH]- | C48H94NO8P |
| PC(18:0_22:4) | 8.83E+02 | 8.38E+02 | [M+COOH]- | C48H88NO8P |
| PC(18:0_22:5) | 8.81E+02 | 8.36E+02 | [M+COOH]- | C48H86NO8P |
| PC(18:0_22:6) | 8.79E+02 | 8.34E+02 | [M+COOH]- | C48H84NO8P |
| PC(18:0_24:3) | 8.69E+02 | 8.68E+02 | [M+H]+    | C50H94NO8P |
| PC(18:0_24:4) | 9.11E+02 | 8.66E+02 | [M+COOH]- | C50H92NO8P |
| PC(18:1_18:1) | 8.31E+02 | 7.86E+02 | [M+COOH]- | C44H84NO8P |
| PC(18:1_18:2) | 8.29E+02 | 7.84E+02 | [M+COOH]- | C44H82NO8P |
| PC(18:1_19:1) | 8.45E+02 | 8.00E+02 | [M+COOH]- | C45H86NO8P |
| PC(18:1_19:2) | 8.43E+02 | 7.98E+02 | [M+COOH]- | C45H84NO8P |
| PC(18:1_20:0) | 8.61E+02 | 8.16E+02 | [M+COOH]- | C46H90NO8P |
| PC(18:1_20:1) | 8.59E+02 | 8.14E+02 | [M+COOH]- | C46H88NO8P |
| PC(18:1_20:4) | 8.53E+02 | 8.08E+02 | [M+COOH]- | C46H82NO8P |
| PC(18:1_20:5) | 8.51E+02 | 8.06E+02 | [M+COOH]- | C46H80NO8P |
| PC(18:1_22:0) | 8.89E+02 | 8.44E+02 | [M+COOH]- | C48H94NO8P |
| PC(18:1_22:1) | 8.87E+02 | 8.42E+02 | [M+COOH]- | C48H92NO8P |
| PC(18:1_22:5) | 8.79E+02 | 8.34E+02 | [M+COOH]- | C48H84NO8P |
| PC(18:1_22:6) | 8.77E+02 | 8.32E+02 | [M+COOH]- | C48H82NO8P |
| PC(18:1_24:1) | 8.71E+02 | 8.70E+02 | [M+H]+    | C50H96NO8P |
| PC(18:2_18:2) | 8.27E+02 | 7.82E+02 | [M+COOH]- | C44H80NO8P |
| PC(18:2_18:3) | 8.25E+02 | 7.80E+02 | [M+COOH]- | C44H78NO8P |
| PC(18:2_19:2) | 8.41E+02 | 7.96E+02 | [M+COOH]- | C45H82NO8P |
| PC(18:2_20:0) | 8.59E+02 | 8.14E+02 | [M+COOH]- | C46H88NO8P |
| PC(18:2_20:3) | 8.53E+02 | 8.08E+02 | [M+COOH]- | C46H82NO8P |
| PC(18:2_20:4) | 8.51E+02 | 8.06E+02 | [M+COOH]- | C46H80NO8P |
| PC(18:2_20:5) | 8.49E+02 | 8.04E+02 | [M+COOH]- | C46H78NO8P |
| PC(18:2_22:1) | 8.85E+02 | 8.40E+02 | [M+COOH]- | C48H90NO8P |
| PC(18:2_22:5) | 8.77E+02 | 8.32E+02 | [M+COOH]- | C48H82NO8P |
| PC(18:2_22:6) | 8.75E+02 | 8.30E+02 | [M+COOH]- | C48H80NO8P |
| PC(18:3_18:1) | 8.27E+02 | 7.82E+02 | [M+COOH]- | C44H80NO8P |
| PC(19:0_18:1) | 8.03E+02 | 8.02E+02 | [M+H]+    | C45H88NO8P |
| PC(19:0_18:2) | 8.01E+02 | 8.00E+02 | [M+H]+    | C45H86NO8P |
| PC(19:0_20:4) | 8.25E+02 | 8.24E+02 | [M+H]+    | C47H86NO8P |
| PC(19:1_22:6) | 8.91E+02 | 8.46E+02 | [M+COOH]- | C49H84NO8P |
| PC(20:0_22:6) | 8.63E+02 | 8.62E+02 | [M+H]+    | C50H88NO8P |
| PC(20:1_18:2) | 8.57E+02 | 8.12E+02 | [M+COOH]- | C46H86NO8P |
| PC(20:1_20:3) | 8.83E+02 | 8.38E+02 | [M+COOH]- | C48H88NO8P |
| PC(20:1_20:4) | 8.81E+02 | 8.36E+02 | [M+COOH]- | C48H86NO8P |
| PC(20:1_22:6) | 8.61E+02 | 8.60E+02 | [M+H]+    | C50H86NO8P |

|                 |          |          |           |            |
|-----------------|----------|----------|-----------|------------|
| PC(20:2_18:1)   | 8.57E+02 | 8.12E+02 | [M+COOH]- | C46H86NO8P |
| PC(20:2_20:4)   | 8.79E+02 | 8.34E+02 | [M+COOH]- | C48H84NO8P |
| PC(20:2_22:6)   | 8.59E+02 | 8.58E+02 | [M+H]+    | C50H84NO8P |
| PC(20:3_18:1)   | 8.55E+02 | 8.10E+02 | [M+COOH]- | C46H84NO8P |
| PC(20:3_20:4)   | 8.77E+02 | 8.32E+02 | [M+COOH]- | C48H82NO8P |
| PC(20:3_22:1)   | 8.67E+02 | 8.66E+02 | [M+H]+    | C50H92NO8P |
| PC(20:4_16:1)   | 8.25E+02 | 7.80E+02 | [M+COOH]- | C44H78NO8P |
| PC(20:4_17:0)   | 7.97E+02 | 7.94E+02 | [M+H]+    | C45H80NO8P |
| PC(20:4_20:4)   | 8.75E+02 | 8.30E+02 | [M+COOH]- | C48H80NO8P |
| PC(20:4_20:5)   | 8.73E+02 | 8.28E+02 | [M+COOH]- | C48H78NO8P |
| PC(20:4_22:6)   | 8.99E+02 | 8.54E+02 | [M+COOH]- | C50H80NO8P |
| PC(20:5_18:0)   | 8.53E+02 | 8.08E+02 | [M+COOH]- | C46H82NO8P |
| PC(22:4_16:0)   | 8.55E+02 | 8.10E+02 | [M+COOH]- | C46H84NO8P |
| PC(22:4_18:1)   | 8.81E+02 | 8.36E+02 | [M+COOH]- | C48H86NO8P |
| PC(22:6_17:0)   | 8.21E+02 | 8.20E+02 | [M+H]+    | C47H82NO8P |
| PC(24:0_16:1)   | 8.89E+02 | 8.44E+02 | [M+COOH]- | C48H94NO8P |
| PC(24:0_18:1)   | 9.17E+02 | 8.72E+02 | [M+COOH]- | C50H98NO8P |
| PC(24:0_18:2)   | 9.15E+02 | 8.70E+02 | [M+COOH]- | C50H96NO8P |
| PC(24:1_20:4)   | 8.93E+02 | 8.92E+02 | [M+H]+    | C52H94NO8P |
| PC(O-14:0_20:4) | 7.41E+02 | 7.40E+02 | [M+H]+    | C42H78NO7P |
| PC(O-16:0_14:0) | 6.93E+02 | 6.92E+02 | [M+H]+    | C38H78NO7P |
| PC(O-16:0_14:1) | 6.91E+02 | 6.90E+02 | [M+H]+    | C38H76NO7P |
| PC(O-16:0_16:0) | 7.21E+02 | 7.20E+02 | [M+H]+    | C40H82NO7P |
| PC(O-16:0_16:1) | 7.19E+02 | 7.18E+02 | [M+H]+    | C40H80NO7P |
| PC(O-16:0_18:2) | 7.45E+02 | 7.44E+02 | [M+H]+    | C42H82NO7P |
| PC(O-16:0_20:4) | 7.69E+02 | 7.68E+02 | [M+H]+    | C44H82NO7P |
| PC(O-16:0_22:0) | 8.05E+02 | 8.04E+02 | [M+H]+    | C46H94NO7P |
| PC(O-16:1_16:1) | 7.17E+02 | 7.16E+02 | [M+H]+    | C40H78NO7P |
| PC(O-16:1_18:2) | 7.43E+02 | 7.42E+02 | [M+H]+    | C42H80NO7P |
| PC(O-16:1_20:4) | 7.67E+02 | 7.66E+02 | [M+H]+    | C44H80NO7P |
| PC(O-16:1_20:5) | 7.65E+02 | 7.64E+02 | [M+H]+    | C44H78NO7P |
| PC(O-16:1_22:6) | 7.91E+02 | 7.90E+02 | [M+H]+    | C46H80NO7P |
| PC(O-18:0_16:0) | 7.49E+02 | 7.48E+02 | [M+H]+    | C42H86NO7P |
| PC(O-18:0_18:2) | 7.73E+02 | 7.72E+02 | [M+H]+    | C44H86NO7P |
| PC(O-18:0_20:4) | 7.97E+02 | 7.96E+02 | [M+H]+    | C46H86NO7P |
| PC(O-18:1_16:0) | 7.47E+02 | 7.46E+02 | [M+H]+    | C42H84NO7P |
| PC(O-18:1_20:1) | 8.01E+02 | 8.00E+02 | [M+H]+    | C46H90NO7P |
| PC(O-18:1_20:4) | 7.95E+02 | 7.94E+02 | [M+H]+    | C46H84NO7P |
| PC(O-18:1_22:0) | 8.31E+02 | 8.30E+02 | [M+H]+    | C48H96NO7P |
| PC(O-18:1_22:1) | 8.29E+02 | 8.28E+02 | [M+H]+    | C48H94NO7P |
| PC(O-18:1_22:6) | 8.19E+02 | 8.18E+02 | [M+H]+    | C48H84NO7P |
| PC(O-18:1_24:1) | 8.57E+02 | 8.56E+02 | [M+H]+    | C50H98NO7P |
| PC(O-18:2_20:4) | 7.93E+02 | 7.92E+02 | [M+H]+    | C46H82NO7P |
| PC(O-20:0_20:4) | 8.25E+02 | 8.24E+02 | [M+H]+    | C48H90NO7P |
| PC(O-20:0_22:4) | 8.53E+02 | 8.52E+02 | [M+H]+    | C50H94NO7P |
| PC(O-20:1_20:4) | 8.23E+02 | 8.22E+02 | [M+H]+    | C48H88NO7P |
| PC(O-22:1_20:4) | 8.51E+02 | 8.50E+02 | [M+H]+    | C50H92NO7P |
| PC(O-24:1_20:4) | 8.79E+02 | 8.78E+02 | [M+H]+    | C52H96NO7P |
| PE(12:0_14:0)   | 6.06E+02 | 6.07E+02 | [M-H]-    | C31H62NO8P |
| PE(12:0_16:0)   | 6.34E+02 | 6.35E+02 | [M-H]-    | C33H66NO8P |
| PE(12:0_17:0)   | 6.48E+02 | 6.49E+02 | [M-H]-    | C34H68NO8P |
| PE(12:0_17:1)   | 6.46E+02 | 6.47E+02 | [M-H]-    | C34H66NO8P |
| PE(12:0_18:1)   | 6.60E+02 | 6.61E+02 | [M-H]-    | C35H68NO8P |
| PE(12:0_22:4)   | 7.10E+02 | 7.11E+02 | [M-H]-    | C39H70NO8P |



|               |          |          |        |            |
|---------------|----------|----------|--------|------------|
| PE(13:0_15:0) | 6.34E+02 | 6.35E+02 | [M-H]- | C33H66NO8P |
| PE(13:0_19:2) | 6.86E+02 | 6.87E+02 | [M-H]- | C37H70NO8P |
| PE(13:0_20:4) | 6.96E+02 | 6.97E+02 | [M-H]- | C38H68NO8P |
| PE(13:0_20:5) | 6.94E+02 | 6.95E+02 | [M-H]- | C38H66NO8P |
| PE(14:0_20:2) | 7.15E+02 | 7.16E+02 | [M-H]- | C39H74NO8P |
| PE(14:0_22:4) | 7.39E+02 | 7.40E+02 | [M-H]- | C41H74NO8P |
| PE(14:0_22:6) | 7.34E+02 | 7.35E+02 | [M-H]- | C41H70NO8P |
| PE(15:0_18:1) | 7.03E+02 | 7.04E+02 | [M-H]- | C38H74NO8P |
| PE(15:0_18:2) | 7.00E+02 | 7.01E+02 | [M-H]- | C38H72NO8P |
| PE(15:0_20:4) | 7.24E+02 | 7.25E+02 | [M-H]- | C40H72NO8P |
| PE(15:0_22:4) | 7.53E+02 | 7.54E+02 | [M-H]- | C42H76NO8P |
| PE(15:0_22:6) | 7.48E+02 | 7.49E+02 | [M-H]- | C42H72NO8P |
| PE(15:1_20:2) | 7.27E+02 | 7.28E+02 | [M-H]- | C40H74NO8P |
| PE(15:1_22:3) | 7.53E+02 | 7.54E+02 | [M-H]- | C42H76NO8P |
| PE(15:1_22:4) | 7.51E+02 | 7.52E+02 | [M-H]- | C42H74NO8P |
| PE(16:0_16:0) | 6.91E+02 | 6.92E+02 | [M-H]- | C37H74NO8P |
| PE(16:0_18:0) | 7.19E+02 | 7.20E+02 | [M-H]- | C39H78NO8P |
| PE(16:0_18:1) | 7.17E+02 | 7.18E+02 | [M-H]- | C39H76NO8P |
| PE(16:0_18:3) | 7.12E+02 | 7.13E+02 | [M-H]- | C39H72NO8P |
| PE(16:0_19:2) | 7.29E+02 | 7.30E+02 | [M-H]- | C40H76NO8P |
| PE(16:0_20:3) | 7.41E+02 | 7.42E+02 | [M-H]- | C41H76NO8P |
| PE(16:0_20:4) | 7.39E+02 | 7.40E+02 | [M-H]- | C41H74NO8P |
| PE(16:0_20:5) | 7.36E+02 | 7.37E+02 | [M-H]- | C41H72NO8P |
| PE(16:0_22:4) | 7.67E+02 | 7.68E+02 | [M-H]- | C43H78NO8P |
| PE(16:0_22:5) | 7.65E+02 | 7.66E+02 | [M-H]- | C43H76NO8P |
| PE(16:1_16:0) | 6.88E+02 | 6.89E+02 | [M-H]- | C37H72NO8P |
| PE(16:1_18:0) | 7.17E+02 | 7.18E+02 | [M-H]- | C39H76NO8P |
| PE(16:1_18:2) | 7.12E+02 | 7.13E+02 | [M-H]- | C39H72NO8P |
| PE(16:1_20:4) | 7.36E+02 | 7.37E+02 | [M-H]- | C41H72NO8P |
| PE(16:1_22:4) | 7.65E+02 | 7.66E+02 | [M-H]- | C43H76NO8P |
| PE(16:1_22:6) | 7.60E+02 | 7.61E+02 | [M-H]- | C43H72NO8P |
| PE(17:0_18:1) | 7.31E+02 | 7.32E+02 | [M-H]- | C40H78NO8P |
| PE(17:0_18:2) | 7.29E+02 | 7.30E+02 | [M-H]- | C40H76NO8P |
| PE(17:0_20:3) | 7.55E+02 | 7.56E+02 | [M-H]- | C42H78NO8P |
| PE(17:0_20:4) | 7.53E+02 | 7.54E+02 | [M-H]- | C42H76NO8P |
| PE(17:0_20:5) | 7.51E+02 | 7.52E+02 | [M-H]- | C42H74NO8P |
| PE(17:0_22:5) | 7.79E+02 | 7.80E+02 | [M-H]- | C44H78NO8P |
| PE(17:0_22:6) | 7.77E+02 | 7.78E+02 | [M-H]- | C44H76NO8P |
| PE(17:1_18:1) | 7.29E+02 | 7.30E+02 | [M-H]- | C40H76NO8P |
| PE(17:1_18:2) | 7.27E+02 | 7.28E+02 | [M-H]- | C40H74NO8P |
| PE(17:1_22:6) | 7.75E+02 | 7.76E+02 | [M-H]- | C44H74NO8P |
| PE(17:2_20:3) | 7.51E+02 | 7.52E+02 | [M-H]- | C42H74NO8P |
| PE(18:0_14:0) | 6.91E+02 | 6.92E+02 | [M-H]- | C37H74NO8P |
| PE(18:0_18:2) | 7.43E+02 | 7.44E+02 | [M-H]- | C41H78NO8P |
| PE(18:0_18:3) | 7.41E+02 | 7.42E+02 | [M-H]- | C41H76NO8P |
| PE(18:0_20:5) | 7.65E+02 | 7.66E+02 | [M-H]- | C43H76NO8P |
| PE(18:0_22:1) | 8.01E+02 | 8.02E+02 | [M-H]- | C45H88NO8P |
| PE(18:0_22:4) | 7.95E+02 | 7.96E+02 | [M-H]- | C45H82NO8P |
| PE(18:0_22:5) | 7.93E+02 | 7.94E+02 | [M-H]- | C45H80NO8P |
| PE(18:0_24:5) | 8.21E+02 | 8.22E+02 | [M-H]- | C47H84NO8P |
| PE(18:1_16:1) | 7.15E+02 | 7.16E+02 | [M-H]- | C39H74NO8P |
| PE(18:1_17:2) | 7.27E+02 | 7.28E+02 | [M-H]- | C40H74NO8P |
| PE(18:1_18:0) | 7.45E+02 | 7.46E+02 | [M-H]- | C41H80NO8P |
| PE(18:1_18:1) | 7.43E+02 | 7.44E+02 | [M-H]- | C41H78NO8P |

|               |          |          |        |            |
|---------------|----------|----------|--------|------------|
| PE(18:1_18:2) | 7.41E+02 | 7.42E+02 | [M-H]- | C41H76NO8P |
| PE(18:1_18:3) | 7.39E+02 | 7.40E+02 | [M-H]- | C41H74NO8P |
| PE(18:1_20:3) | 7.67E+02 | 7.68E+02 | [M-H]- | C43H78NO8P |
| PE(18:1_20:4) | 7.65E+02 | 7.66E+02 | [M-H]- | C43H76NO8P |
| PE(18:1_22:1) | 7.99E+02 | 8.00E+02 | [M-H]- | C45H86NO8P |
| PE(18:1_22:5) | 7.91E+02 | 7.92E+02 | [M-H]- | C45H78NO8P |
| PE(18:1_24:1) | 8.27E+02 | 8.28E+02 | [M-H]- | C47H90NO8P |
| PE(18:2_16:0) | 7.15E+02 | 7.16E+02 | [M-H]- | C39H74NO8P |
| PE(18:2_18:2) | 7.39E+02 | 7.40E+02 | [M-H]- | C41H74NO8P |
| PE(18:2_18:3) | 7.36E+02 | 7.37E+02 | [M-H]- | C41H72NO8P |
| PE(18:2_19:1) | 7.55E+02 | 7.56E+02 | [M-H]- | C42H78NO8P |
| PE(18:2_22:5) | 7.89E+02 | 7.90E+02 | [M-H]- | C45H76NO8P |
| PE(18:3_16:0) | 7.12E+02 | 7.13E+02 | [M-H]- | C39H72NO8P |
| PE(18:3_16:1) | 7.10E+02 | 7.11E+02 | [M-H]- | C39H70NO8P |
| PE(18:3_18:1) | 7.39E+02 | 7.40E+02 | [M-H]- | C41H74NO8P |
| PE(18:3_20:1) | 7.67E+02 | 7.68E+02 | [M-H]- | C43H78NO8P |
| PE(19:0_18:2) | 7.57E+02 | 7.58E+02 | [M-H]- | C42H80NO8P |
| PE(19:0_20:4) | 7.81E+02 | 7.82E+02 | [M-H]- | C44H80NO8P |
| PE(19:0_22:6) | 8.05E+02 | 8.06E+02 | [M-H]- | C46H80NO8P |
| PE(19:1_20:4) | 7.79E+02 | 7.80E+02 | [M-H]- | C44H78NO8P |
| PE(20:1_16:0) | 7.45E+02 | 7.46E+02 | [M-H]- | C41H80NO8P |
| PE(20:1_18:0) | 7.73E+02 | 7.74E+02 | [M-H]- | C43H84NO8P |
| PE(20:1_18:1) | 7.71E+02 | 7.72E+02 | [M-H]- | C43H82NO8P |
| PE(20:1_18:2) | 7.69E+02 | 7.70E+02 | [M-H]- | C43H80NO8P |
| PE(20:1_20:4) | 7.93E+02 | 7.94E+02 | [M-H]- | C45H80NO8P |
| PE(20:1_20:5) | 7.91E+02 | 7.92E+02 | [M-H]- | C45H78NO8P |
| PE(20:2_16:0) | 7.43E+02 | 7.44E+02 | [M-H]- | C41H78NO8P |
| PE(20:2_18:0) | 7.71E+02 | 7.72E+02 | [M-H]- | C43H82NO8P |
| PE(20:2_18:3) | 7.65E+02 | 7.66E+02 | [M-H]- | C43H76NO8P |
| PE(20:2_20:4) | 7.91E+02 | 7.92E+02 | [M-H]- | C45H78NO8P |
| PE(20:2_20:5) | 7.89E+02 | 7.90E+02 | [M-H]- | C45H76NO8P |
| PE(20:2_22:5) | 8.17E+02 | 8.18E+02 | [M-H]- | C47H80NO8P |
| PE(20:2_22:6) | 8.15E+02 | 8.16E+02 | [M-H]- | C47H78NO8P |
| PE(20:3_18:0) | 7.69E+02 | 7.70E+02 | [M-H]- | C43H80NO8P |
| PE(20:3_20:4) | 7.89E+02 | 7.90E+02 | [M-H]- | C45H76NO8P |
| PE(20:4_14:0) | 7.10E+02 | 7.11E+02 | [M-H]- | C39H70NO8P |
| PE(20:4_18:0) | 7.67E+02 | 7.68E+02 | [M-H]- | C43H78NO8P |
| PE(20:4_20:4) | 7.87E+02 | 7.88E+02 | [M-H]- | C45H74NO8P |
| PE(20:4_22:2) | 8.19E+02 | 8.20E+02 | [M-H]- | C47H82NO8P |
| PE(20:4_22:6) | 8.11E+02 | 8.12E+02 | [M-H]- | C47H74NO8P |
| PE(20:5_16:1) | 7.34E+02 | 7.35E+02 | [M-H]- | C41H70NO8P |
| PE(20:5_18:1) | 7.63E+02 | 7.64E+02 | [M-H]- | C43H74NO8P |
| PE(20:5_18:2) | 7.60E+02 | 7.61E+02 | [M-H]- | C43H72NO8P |
| PE(22:0_18:1) | 8.01E+02 | 8.02E+02 | [M-H]- | C45H88NO8P |
| PE(22:0_18:2) | 7.99E+02 | 8.00E+02 | [M-H]- | C45H86NO8P |
| PE(22:1_18:0) | 8.01E+02 | 8.02E+02 | [M-H]- | C45H88NO8P |
| PE(22:2_22:5) | 8.45E+02 | 8.46E+02 | [M-H]- | C49H84NO8P |
| PE(22:3_20:4) | 8.17E+02 | 8.18E+02 | [M-H]- | C47H80NO8P |
| PE(22:6_16:0) | 7.63E+02 | 7.64E+02 | [M-H]- | C43H74NO8P |
| PE(22:6_18:0) | 7.91E+02 | 7.92E+02 | [M-H]- | C45H78NO8P |
| PE(22:6_18:1) | 7.89E+02 | 7.90E+02 | [M-H]- | C45H76NO8P |
| PE(22:6_18:2) | 7.87E+02 | 7.88E+02 | [M-H]- | C45H74NO8P |
| PE(22:6_20:0) | 8.19E+02 | 8.20E+02 | [M-H]- | C47H82NO8P |
| PE(22:6_20:1) | 8.17E+02 | 8.18E+02 | [M-H]- | C47H80NO8P |

|                 |          |          |        |            |
|-----------------|----------|----------|--------|------------|
| PE(24:0_18:1)   | 8.29E+02 | 8.30E+02 | [M-H]- | C47H92NO8P |
| PE(24:0_20:4)   | 8.51E+02 | 8.52E+02 | [M-H]- | C49H90NO8P |
| PE(O-16:0_16:0) | 6.77E+02 | 6.78E+02 | [M-H]- | C37H76NO7P |
| PE(O-16:0_16:1) | 6.75E+02 | 6.76E+02 | [M-H]- | C37H74NO7P |
| PE(O-16:0_18:1) | 7.03E+02 | 7.04E+02 | [M-H]- | C39H78NO7P |
| PE(O-16:0_18:2) | 7.01E+02 | 7.02E+02 | [M-H]- | C39H76NO7P |
| PE(O-16:0_20:0) | 7.33E+02 | 7.34E+02 | [M-H]- | C41H84NO7P |
| PE(O-16:0_20:3) | 7.27E+02 | 7.28E+02 | [M-H]- | C41H78NO7P |
| PE(O-16:0_20:4) | 7.25E+02 | 7.26E+02 | [M-H]- | C41H76NO7P |
| PE(O-16:0_20:5) | 7.23E+02 | 7.24E+02 | [M-H]- | C41H74NO7P |
| PE(O-16:0_22:3) | 7.55E+02 | 7.56E+02 | [M-H]- | C43H82NO7P |
| PE(O-16:0_22:4) | 7.53E+02 | 7.54E+02 | [M-H]- | C43H80NO7P |
| PE(O-16:0_22:6) | 7.49E+02 | 7.50E+02 | [M-H]- | C43H76NO7P |
| PE(O-16:1_16:0) | 6.75E+02 | 6.76E+02 | [M-H]- | C37H74NO7P |
| PE(O-16:1_16:1) | 6.72E+02 | 6.74E+02 | [M-H]- | C37H72NO7P |
| PE(O-16:1_18:1) | 7.01E+02 | 7.02E+02 | [M-H]- | C39H76NO7P |
| PE(O-16:1_20:1) | 7.29E+02 | 7.30E+02 | [M-H]- | C41H80NO7P |
| PE(O-16:1_20:3) | 7.25E+02 | 7.26E+02 | [M-H]- | C41H76NO7P |
| PE(O-16:1_20:4) | 7.23E+02 | 7.24E+02 | [M-H]- | C41H74NO7P |
| PE(O-16:1_20:5) | 7.20E+02 | 7.22E+02 | [M-H]- | C41H72NO7P |
| PE(O-16:1_21:1) | 7.43E+02 | 7.44E+02 | [M-H]- | C42H82NO7P |
| PE(O-16:1_22:1) | 7.57E+02 | 7.58E+02 | [M-H]- | C43H84NO7P |
| PE(O-16:1_22:5) | 7.49E+02 | 7.50E+02 | [M-H]- | C43H76NO7P |
| PE(O-16:1_22:6) | 7.47E+02 | 7.48E+02 | [M-H]- | C43H74NO7P |
| PE(O-16:1_24:4) | 7.79E+02 | 7.80E+02 | [M-H]- | C45H82NO7P |
| PE(O-16:2_20:4) | 7.20E+02 | 7.22E+02 | [M-H]- | C41H72NO7P |
| PE(O-17:1_18:1) | 7.15E+02 | 7.16E+02 | [M-H]- | C40H78NO7P |
| PE(O-17:1_18:2) | 7.13E+02 | 7.14E+02 | [M-H]- | C40H76NO7P |
| PE(O-17:1_20:4) | 7.37E+02 | 7.38E+02 | [M-H]- | C42H76NO7P |
| PE(O-17:1_22:4) | 7.65E+02 | 7.66E+02 | [M-H]- | C44H80NO7P |
| PE(O-17:1_22:6) | 7.61E+02 | 7.62E+02 | [M-H]- | C44H76NO7P |
| PE(O-17:2_18:1) | 7.13E+02 | 7.14E+02 | [M-H]- | C40H76NO7P |
| PE(O-17:2_20:4) | 7.35E+02 | 7.36E+02 | [M-H]- | C42H74NO7P |
| PE(O-18:0_16:0) | 7.05E+02 | 7.06E+02 | [M-H]- | C39H80NO7P |
| PE(O-18:0_20:1) | 7.59E+02 | 7.60E+02 | [M-H]- | C43H86NO7P |
| PE(O-18:0_20:4) | 7.53E+02 | 7.54E+02 | [M-H]- | C43H80NO7P |
| PE(O-18:0_22:4) | 7.81E+02 | 7.82E+02 | [M-H]- | C45H84NO7P |
| PE(O-18:0_22:6) | 7.77E+02 | 7.78E+02 | [M-H]- | C45H80NO7P |
| PE(O-18:1_18:0) | 7.31E+02 | 7.32E+02 | [M-H]- | C41H82NO7P |
| PE(O-18:1_18:1) | 7.29E+02 | 7.30E+02 | [M-H]- | C41H80NO7P |
| PE(O-18:1_18:2) | 7.27E+02 | 7.28E+02 | [M-H]- | C41H78NO7P |
| PE(O-18:1_20:1) | 7.57E+02 | 7.58E+02 | [M-H]- | C43H84NO7P |
| PE(O-18:1_20:3) | 7.53E+02 | 7.54E+02 | [M-H]- | C43H80NO7P |
| PE(O-18:1_20:4) | 7.51E+02 | 7.52E+02 | [M-H]- | C43H78NO7P |
| PE(O-18:1_20:5) | 7.49E+02 | 7.50E+02 | [M-H]- | C43H76NO7P |
| PE(O-18:1_21:1) | 7.71E+02 | 7.72E+02 | [M-H]- | C44H86NO7P |
| PE(O-18:1_22:1) | 7.85E+02 | 7.86E+02 | [M-H]- | C45H88NO7P |
| PE(O-18:1_22:2) | 7.83E+02 | 7.84E+02 | [M-H]- | C45H86NO7P |
| PE(O-18:1_22:4) | 7.79E+02 | 7.80E+02 | [M-H]- | C45H82NO7P |
| PE(O-18:1_22:5) | 7.77E+02 | 7.78E+02 | [M-H]- | C45H80NO7P |
| PE(O-18:1_22:6) | 7.75E+02 | 7.76E+02 | [M-H]- | C45H78NO7P |
| PE(O-18:1_24:4) | 8.07E+02 | 8.08E+02 | [M-H]- | C47H86NO7P |
| PE(O-18:1_24:5) | 8.05E+02 | 8.06E+02 | [M-H]- | C47H84NO7P |
| PE(O-18:2_18:1) | 7.27E+02 | 7.28E+02 | [M-H]- | C41H78NO7P |

|                 |          |          |        |            |
|-----------------|----------|----------|--------|------------|
| PE(O-18:2_18:2) | 7.25E+02 | 7.26E+02 | [M-H]- | C41H76NO7P |
| PE(O-18:2_19:1) | 7.41E+02 | 7.42E+02 | [M-H]- | C42H80NO7P |
| PE(O-18:2_20:1) | 7.55E+02 | 7.56E+02 | [M-H]- | C43H82NO7P |
| PE(O-18:2_20:2) | 7.53E+02 | 7.54E+02 | [M-H]- | C43H80NO7P |
| PE(O-18:2_20:4) | 7.49E+02 | 7.50E+02 | [M-H]- | C43H76NO7P |
| PE(O-18:2_20:5) | 7.47E+02 | 7.48E+02 | [M-H]- | C43H74NO7P |
| PE(O-18:2_22:1) | 7.83E+02 | 7.84E+02 | [M-H]- | C45H86NO7P |
| PE(O-18:2_22:5) | 7.75E+02 | 7.76E+02 | [M-H]- | C45H78NO7P |
| PE(O-18:2_22:6) | 7.73E+02 | 7.74E+02 | [M-H]- | C45H76NO7P |
| PE(O-18:2_24:1) | 8.11E+02 | 8.12E+02 | [M-H]- | C47H90NO7P |
| PE(O-18:2_24:2) | 8.09E+02 | 8.10E+02 | [M-H]- | C47H88NO7P |
| PE(O-18:3_18:1) | 7.25E+02 | 7.26E+02 | [M-H]- | C41H76NO7P |
| PE(O-18:3_20:4) | 7.47E+02 | 7.48E+02 | [M-H]- | C43H74NO7P |
| PE(O-19:1_22:6) | 7.89E+02 | 7.90E+02 | [M-H]- | C46H80NO7P |
| PE(O-20:0_16:0) | 7.33E+02 | 7.34E+02 | [M-H]- | C41H84NO7P |
| PE(O-20:0_18:1) | 7.59E+02 | 7.60E+02 | [M-H]- | C43H86NO7P |
| PE(O-20:0_18:2) | 7.57E+02 | 7.58E+02 | [M-H]- | C43H84NO7P |
| PE(O-20:0_20:4) | 7.81E+02 | 7.82E+02 | [M-H]- | C45H84NO7P |
| PE(O-20:0_22:4) | 8.09E+02 | 8.10E+02 | [M-H]- | C47H88NO7P |
| PE(O-20:0_22:6) | 8.05E+02 | 8.06E+02 | [M-H]- | C47H84NO7P |
| PE(O-20:1_18:1) | 7.57E+02 | 7.58E+02 | [M-H]- | C43H84NO7P |
| PE(O-20:1_18:2) | 7.55E+02 | 7.56E+02 | [M-H]- | C43H82NO7P |
| PE(O-20:1_20:1) | 7.85E+02 | 7.86E+02 | [M-H]- | C45H88NO7P |
| PE(O-20:1_20:5) | 7.77E+02 | 7.78E+02 | [M-H]- | C45H80NO7P |
| PE(O-20:1_22:4) | 8.07E+02 | 8.08E+02 | [M-H]- | C47H86NO7P |
| PE(O-20:1_22:5) | 8.05E+02 | 8.06E+02 | [M-H]- | C47H84NO7P |
| PE(O-20:1_22:6) | 8.03E+02 | 8.04E+02 | [M-H]- | C47H82NO7P |
| PE(O-20:2_22:6) | 8.01E+02 | 8.02E+02 | [M-H]- | C47H80NO7P |
| PE(O-20:3_20:4) | 7.75E+02 | 7.76E+02 | [M-H]- | C45H78NO7P |
| PE(O-20:5_16:0) | 7.23E+02 | 7.24E+02 | [M-H]- | C41H74NO7P |
| PE(O-22:0_18:2) | 7.85E+02 | 7.86E+02 | [M-H]- | C45H88NO7P |
| PE(O-22:0_22:6) | 8.33E+02 | 8.34E+02 | [M-H]- | C49H88NO7P |
| PE(O-22:1_18:1) | 7.85E+02 | 7.86E+02 | [M-H]- | C45H88NO7P |
| PE(O-22:1_18:2) | 7.83E+02 | 7.84E+02 | [M-H]- | C45H86NO7P |
| PE(O-22:1_20:4) | 8.07E+02 | 8.08E+02 | [M-H]- | C47H86NO7P |
| PE(O-22:2_22:4) | 8.33E+02 | 8.34E+02 | [M-H]- | C49H88NO7P |
| PE(O-24:2_18:1) | 8.11E+02 | 8.12E+02 | [M-H]- | C47H90NO7P |
| PE(P-14:0_20:4) | 6.96E+02 | 6.95E+02 | [M+H]+ | C39H70NO7P |
| PE(P-14:0_22:6) | 7.20E+02 | 7.19E+02 | [M+H]+ | C41H70NO7P |
| PE(P-15:0_20:4) | 7.11E+02 | 7.10E+02 | [M+H]+ | C40H72NO7P |
| PE(P-16:0_16:0) | 6.77E+02 | 6.76E+02 | [M+H]+ | C37H74NO7P |
| PE(P-16:0_16:1) | 6.75E+02 | 6.74E+02 | [M+H]+ | C37H72NO7P |
| PE(P-16:0_17:1) | 6.89E+02 | 6.88E+02 | [M+H]+ | C38H74NO7P |
| PE(P-16:0_18:1) | 7.03E+02 | 7.02E+02 | [M+H]+ | C39H76NO7P |
| PE(P-16:0_18:2) | 7.01E+02 | 7.00E+02 | [M+H]+ | C39H74NO7P |
| PE(P-16:0_18:3) | 6.99E+02 | 6.98E+02 | [M+H]+ | C39H72NO7P |
| PE(P-16:0_20:1) | 7.31E+02 | 7.30E+02 | [M+H]+ | C41H80NO7P |
| PE(P-16:0_20:2) | 7.29E+02 | 7.28E+02 | [M+H]+ | C41H78NO7P |
| PE(P-16:0_20:3) | 7.27E+02 | 7.26E+02 | [M+H]+ | C41H76NO7P |
| PE(P-16:0_20:4) | 7.25E+02 | 7.24E+02 | [M+H]+ | C41H74NO7P |
| PE(P-16:0_20:5) | 7.23E+02 | 7.22E+02 | [M+H]+ | C41H72NO7P |
| PE(P-16:0_22:0) | 7.61E+02 | 7.60E+02 | [M+H]+ | C43H86NO7P |
| PE(P-16:0_22:1) | 7.59E+02 | 7.58E+02 | [M+H]+ | C43H84NO7P |
| PE(P-16:0_22:3) | 7.55E+02 | 7.54E+02 | [M+H]+ | C43H80NO7P |

|                 |          |          |                    |            |
|-----------------|----------|----------|--------------------|------------|
| PE(P-16:0_22:4) | 7.53E+02 | 7.52E+02 | [M+H] <sup>+</sup> | C43H78NO7P |
| PE(P-16:0_22:5) | 7.51E+02 | 7.50E+02 | [M+H] <sup>+</sup> | C43H76NO7P |
| PE(P-16:0_22:6) | 7.49E+02 | 7.48E+02 | [M+H] <sup>+</sup> | C43H74NO7P |
| PE(P-16:0_24:2) | 7.85E+02 | 7.84E+02 | [M+H] <sup>+</sup> | C45H86NO7P |
| PE(P-16:0_24:3) | 7.83E+02 | 7.82E+02 | [M+H] <sup>+</sup> | C45H84NO7P |
| PE(P-16:0_24:4) | 7.81E+02 | 7.80E+02 | [M+H] <sup>+</sup> | C45H82NO7P |
| PE(P-16:0_24:5) | 7.79E+02 | 7.78E+02 | [M+H] <sup>+</sup> | C45H80NO7P |
| PE(P-16:0_24:6) | 7.77E+02 | 7.76E+02 | [M+H] <sup>+</sup> | C45H78NO7P |
| PE(P-16:1_20:4) | 7.23E+02 | 7.22E+02 | [M+H] <sup>+</sup> | C41H72NO7P |
| PE(P-16:1_22:2) | 7.55E+02 | 7.54E+02 | [M+H] <sup>+</sup> | C43H80NO7P |
| PE(P-17:0_18:1) | 7.17E+02 | 7.16E+02 | [M+H] <sup>+</sup> | C40H78NO7P |
| PE(P-17:0_20:1) | 7.45E+02 | 7.44E+02 | [M+H] <sup>+</sup> | C42H82NO7P |
| PE(P-17:0_20:3) | 7.41E+02 | 7.40E+02 | [M+H] <sup>+</sup> | C42H78NO7P |
| PE(P-17:0_20:4) | 7.39E+02 | 7.38E+02 | [M+H] <sup>+</sup> | C42H76NO7P |
| PE(P-17:0_22:4) | 7.67E+02 | 7.66E+02 | [M+H] <sup>+</sup> | C44H80NO7P |
| PE(P-17:0_22:5) | 7.65E+02 | 7.64E+02 | [M+H] <sup>+</sup> | C44H78NO7P |
| PE(P-17:0_22:6) | 7.63E+02 | 7.62E+02 | [M+H] <sup>+</sup> | C44H76NO7P |
| PE(P-18:0_18:0) | 7.33E+02 | 7.32E+02 | [M+H] <sup>+</sup> | C41H82NO7P |
| PE(P-18:0_18:1) | 7.31E+02 | 7.30E+02 | [M+H] <sup>+</sup> | C41H80NO7P |
| PE(P-18:0_18:2) | 7.29E+02 | 7.28E+02 | [M+H] <sup>+</sup> | C41H78NO7P |
| PE(P-18:0_20:0) | 7.61E+02 | 7.60E+02 | [M+H] <sup>+</sup> | C43H86NO7P |
| PE(P-18:0_20:1) | 7.59E+02 | 7.58E+02 | [M+H] <sup>+</sup> | C43H84NO7P |
| PE(P-18:0_20:3) | 7.55E+02 | 7.54E+02 | [M+H] <sup>+</sup> | C43H80NO7P |
| PE(P-18:0_20:4) | 7.53E+02 | 7.52E+02 | [M+H] <sup>+</sup> | C43H78NO7P |
| PE(P-18:0_20:5) | 7.51E+02 | 7.50E+02 | [M+H] <sup>+</sup> | C43H76NO7P |
| PE(P-18:0_22:0) | 7.89E+02 | 7.88E+02 | [M+H] <sup>+</sup> | C45H90NO7P |
| PE(P-18:0_22:1) | 7.87E+02 | 7.86E+02 | [M+H] <sup>+</sup> | C45H88NO7P |
| PE(P-18:0_22:3) | 7.83E+02 | 7.82E+02 | [M+H] <sup>+</sup> | C45H84NO7P |
| PE(P-18:0_22:4) | 7.81E+02 | 7.80E+02 | [M+H] <sup>+</sup> | C45H82NO7P |
| PE(P-18:0_22:5) | 7.79E+02 | 7.78E+02 | [M+H] <sup>+</sup> | C45H80NO7P |
| PE(P-18:0_22:6) | 7.77E+02 | 7.76E+02 | [M+H] <sup>+</sup> | C45H78NO7P |
| PE(P-18:0_24:2) | 8.13E+02 | 8.12E+02 | [M+H] <sup>+</sup> | C47H90NO7P |
| PE(P-18:0_24:3) | 8.11E+02 | 8.10E+02 | [M+H] <sup>+</sup> | C47H88NO7P |
| PE(P-18:0_24:4) | 8.09E+02 | 8.08E+02 | [M+H] <sup>+</sup> | C47H86NO7P |
| PE(P-18:0_24:5) | 8.07E+02 | 8.06E+02 | [M+H] <sup>+</sup> | C47H84NO7P |
| PE(P-18:0_24:6) | 8.05E+02 | 8.04E+02 | [M+H] <sup>+</sup> | C47H82NO7P |
| PE(P-18:1_14:0) | 6.75E+02 | 6.74E+02 | [M+H] <sup>+</sup> | C37H72NO7P |
| PE(P-18:1_16:1) | 7.01E+02 | 7.00E+02 | [M+H] <sup>+</sup> | C39H74NO7P |
| PE(P-18:1_17:1) | 7.15E+02 | 7.14E+02 | [M+H] <sup>+</sup> | C40H76NO7P |
| PE(P-18:1_18:1) | 7.29E+02 | 7.28E+02 | [M+H] <sup>+</sup> | C41H78NO7P |
| PE(P-18:1_18:2) | 7.27E+02 | 7.26E+02 | [M+H] <sup>+</sup> | C41H76NO7P |
| PE(P-18:1_19:1) | 7.43E+02 | 7.42E+02 | [M+H] <sup>+</sup> | C42H80NO7P |
| PE(P-18:1_20:0) | 7.59E+02 | 7.58E+02 | [M+H] <sup>+</sup> | C43H84NO7P |
| PE(P-18:1_20:1) | 7.57E+02 | 7.56E+02 | [M+H] <sup>+</sup> | C43H82NO7P |
| PE(P-18:1_20:2) | 7.55E+02 | 7.54E+02 | [M+H] <sup>+</sup> | C43H80NO7P |
| PE(P-18:1_20:3) | 7.53E+02 | 7.52E+02 | [M+H] <sup>+</sup> | C43H78NO7P |
| PE(P-18:1_20:4) | 7.51E+02 | 7.50E+02 | [M+H] <sup>+</sup> | C43H76NO7P |
| PE(P-18:1_20:5) | 7.49E+02 | 7.48E+02 | [M+H] <sup>+</sup> | C43H74NO7P |
| PE(P-18:1_21:0) | 7.73E+02 | 7.72E+02 | [M+H] <sup>+</sup> | C44H86NO7P |
| PE(P-18:1_22:1) | 7.85E+02 | 7.84E+02 | [M+H] <sup>+</sup> | C45H86NO7P |
| PE(P-18:1_22:3) | 7.81E+02 | 7.80E+02 | [M+H] <sup>+</sup> | C45H82NO7P |
| PE(P-18:1_22:4) | 7.79E+02 | 7.78E+02 | [M+H] <sup>+</sup> | C45H80NO7P |
| PE(P-18:1_22:5) | 7.77E+02 | 7.76E+02 | [M+H] <sup>+</sup> | C45H78NO7P |
| PE(P-18:1_22:6) | 7.75E+02 | 7.74E+02 | [M+H] <sup>+</sup> | C45H76NO7P |

|                 |          |          |        |            |
|-----------------|----------|----------|--------|------------|
| PE(P-18:1_24:2) | 8.11E+02 | 8.10E+02 | [M+H]+ | C47H88NO7P |
| PE(P-18:1_24:4) | 8.07E+02 | 8.06E+02 | [M+H]+ | C47H84NO7P |
| PE(P-18:1_24:5) | 8.05E+02 | 8.04E+02 | [M+H]+ | C47H82NO7P |
| PE(P-18:2_16:1) | 6.99E+02 | 6.98E+02 | [M+H]+ | C39H72NO7P |
| PE(P-18:2_18:1) | 7.27E+02 | 7.26E+02 | [M+H]+ | C41H76NO7P |
| PE(P-18:2_18:2) | 7.25E+02 | 7.24E+02 | [M+H]+ | C41H74NO7P |
| PE(P-18:2_20:2) | 7.53E+02 | 7.52E+02 | [M+H]+ | C43H78NO7P |
| PE(P-18:2_20:4) | 7.49E+02 | 7.48E+02 | [M+H]+ | C43H74NO7P |
| PE(P-18:2_20:5) | 7.47E+02 | 7.46E+02 | [M+H]+ | C43H72NO7P |
| PE(P-18:2_22:5) | 7.75E+02 | 7.74E+02 | [M+H]+ | C45H76NO7P |
| PE(P-18:2_22:6) | 7.73E+02 | 7.72E+02 | [M+H]+ | C45H74NO7P |
| PE(P-18:3_18:1) | 7.25E+02 | 7.24E+02 | [M+H]+ | C41H74NO7P |
| PE(P-18:3_22:4) | 7.75E+02 | 7.74E+02 | [M+H]+ | C45H76NO7P |
| PE(P-18:3_22:6) | 7.71E+02 | 7.70E+02 | [M+H]+ | C45H72NO7P |
| PE(P-19:0_20:1) | 7.73E+02 | 7.72E+02 | [M+H]+ | C44H86NO7P |
| PE(P-19:0_20:4) | 7.67E+02 | 7.66E+02 | [M+H]+ | C44H80NO7P |
| PE(P-20:0_18:1) | 7.59E+02 | 7.58E+02 | [M+H]+ | C43H84NO7P |
| PE(P-20:0_20:3) | 7.83E+02 | 7.82E+02 | [M+H]+ | C45H84NO7P |
| PE(P-20:0_22:5) | 8.07E+02 | 8.06E+02 | [M+H]+ | C47H84NO7P |
| PE(P-20:1_18:2) | 7.55E+02 | 7.54E+02 | [M+H]+ | C43H80NO7P |
| PE(P-20:1_20:3) | 7.81E+02 | 7.80E+02 | [M+H]+ | C45H82NO7P |
| PE(P-20:1_22:6) | 8.03E+02 | 8.02E+02 | [M+H]+ | C47H80NO7P |
| PE(P-20:2_22:4) | 8.05E+02 | 8.04E+02 | [M+H]+ | C47H82NO7P |
| PE(P-20:2_22:6) | 8.01E+02 | 8.00E+02 | [M+H]+ | C47H78NO7P |
| PE(P-20:3_18:1) | 7.53E+02 | 7.52E+02 | [M+H]+ | C43H78NO7P |
| PE(P-20:3_20:4) | 7.75E+02 | 7.74E+02 | [M+H]+ | C45H76NO7P |
| PE(P-20:3_22:6) | 7.99E+02 | 7.98E+02 | [M+H]+ | C47H76NO7P |
| PE(P-22:0_20:4) | 8.09E+02 | 8.08E+02 | [M+H]+ | C47H86NO7P |
| PE(P-22:1_18:2) | 7.83E+02 | 7.82E+02 | [M+H]+ | C45H84NO7P |
| PE(P-22:1_20:4) | 8.07E+02 | 8.06E+02 | [M+H]+ | C47H84NO7P |
| PE(P-22:1_22:6) | 8.31E+02 | 8.30E+02 | [M+H]+ | C49H84NO7P |
| PE(P-24:1_18:1) | 8.13E+02 | 8.12E+02 | [M+H]+ | C47H90NO7P |
| PE(P-24:2_18:2) | 8.09E+02 | 8.08E+02 | [M+H]+ | C47H86NO7P |
| PG(10:0_14:0)   | 6.09E+02 | 6.10E+02 | [M-H]- | C30H59O10P |
| PG(12:0_14:1)   | 6.35E+02 | 6.36E+02 | [M-H]- | C32H61O10P |
| PG(12:0_15:0)   | 6.51E+02 | 6.52E+02 | [M-H]- | C33H65O10P |
| PG(12:0_16:1)   | 6.63E+02 | 6.64E+02 | [M-H]- | C34H65O10P |
| PG(12:0_17:1)   | 6.77E+02 | 6.78E+02 | [M-H]- | C35H67O10P |
| PG(12:0_18:1)   | 6.91E+02 | 6.92E+02 | [M-H]- | C36H69O10P |
| PG(12:0_22:5)   | 7.39E+02 | 7.40E+02 | [M-H]- | C40H69O10P |
| PG(13:0_13:1)   | 6.35E+02 | 6.36E+02 | [M-H]- | C32H61O10P |
| PG(14:0_16:0)   | 6.93E+02 | 6.94E+02 | [M-H]- | C36H71O10P |
| PG(14:0_16:1)   | 6.91E+02 | 6.92E+02 | [M-H]- | C36H69O10P |
| PG(16:0_16:0)   | 7.22E+02 | 7.23E+02 | [M-H]- | C38H75O10P |
| PG(16:0_16:1)   | 7.19E+02 | 7.20E+02 | [M-H]- | C38H73O10P |
| PG(16:0_16:2)   | 7.17E+02 | 7.18E+02 | [M-H]- | C38H71O10P |
| PG(16:0_18:1)   | 7.48E+02 | 7.49E+02 | [M-H]- | C40H77O10P |
| PG(16:0_18:3)   | 7.43E+02 | 7.44E+02 | [M-H]- | C40H73O10P |
| PG(16:0_20:0)   | 7.78E+02 | 7.79E+02 | [M-H]- | C42H83O10P |
| PG(16:0_20:1)   | 7.76E+02 | 7.77E+02 | [M-H]- | C42H81O10P |
| PG(16:0_20:2)   | 7.74E+02 | 7.75E+02 | [M-H]- | C42H79O10P |
| PG(16:0_20:4)   | 7.70E+02 | 7.71E+02 | [M-H]- | C42H75O10P |
| PG(16:0_20:5)   | 7.67E+02 | 7.68E+02 | [M-H]- | C42H73O10P |
| PG(16:0_22:0)   | 8.06E+02 | 8.07E+02 | [M-H]- | C44H87O10P |

|               |          |          |        |            |
|---------------|----------|----------|--------|------------|
| PG(16:0_22:1) | 8.04E+02 | 8.05E+02 | [M-H]- | C44H85O10P |
| PG(16:0_22:2) | 8.02E+02 | 8.03E+02 | [M-H]- | C44H83O10P |
| PG(16:0_22:3) | 8.00E+02 | 8.01E+02 | [M-H]- | C44H81O10P |
| PG(16:0_22:6) | 7.94E+02 | 7.95E+02 | [M-H]- | C44H75O10P |
| PG(16:1_16:1) | 7.17E+02 | 7.18E+02 | [M-H]- | C38H71O10P |
| PG(16:1_16:2) | 7.15E+02 | 7.16E+02 | [M-H]- | C38H69O10P |
| PG(16:1_18:3) | 7.41E+02 | 7.42E+02 | [M-H]- | C40H71O10P |
| PG(16:1_20:3) | 7.70E+02 | 7.71E+02 | [M-H]- | C42H75O10P |
| PG(16:1_20:4) | 7.67E+02 | 7.68E+02 | [M-H]- | C42H73O10P |
| PG(16:1_20:5) | 7.65E+02 | 7.66E+02 | [M-H]- | C42H71O10P |
| PG(16:1_22:6) | 7.91E+02 | 7.92E+02 | [M-H]- | C44H73O10P |
| PG(17:0_18:0) | 7.64E+02 | 7.65E+02 | [M-H]- | C41H81O10P |
| PG(17:0_19:0) | 7.78E+02 | 7.79E+02 | [M-H]- | C42H83O10P |
| PG(17:0_22:1) | 8.18E+02 | 8.19E+02 | [M-H]- | C45H87O10P |
| PG(17:1_18:1) | 7.62E+02 | 7.63E+02 | [M-H]- | C41H79O10P |
| PG(18:0_16:0) | 7.50E+02 | 7.51E+02 | [M-H]- | C40H79O10P |
| PG(18:0_16:1) | 7.48E+02 | 7.49E+02 | [M-H]- | C40H77O10P |
| PG(18:0_18:1) | 7.76E+02 | 7.77E+02 | [M-H]- | C42H81O10P |
| PG(18:0_18:2) | 7.74E+02 | 7.75E+02 | [M-H]- | C42H79O10P |
| PG(18:0_19:0) | 7.92E+02 | 7.93E+02 | [M-H]- | C43H85O10P |
| PG(18:0_19:2) | 7.88E+02 | 7.89E+02 | [M-H]- | C43H81O10P |
| PG(18:0_20:4) | 7.98E+02 | 7.99E+02 | [M-H]- | C44H79O10P |
| PG(18:1_18:1) | 7.74E+02 | 7.75E+02 | [M-H]- | C42H79O10P |
| PG(18:1_18:3) | 7.70E+02 | 7.71E+02 | [M-H]- | C42H75O10P |
| PG(18:1_19:1) | 7.88E+02 | 7.89E+02 | [M-H]- | C43H81O10P |
| PG(18:1_20:3) | 7.98E+02 | 7.99E+02 | [M-H]- | C44H79O10P |
| PG(18:1_20:4) | 7.96E+02 | 7.97E+02 | [M-H]- | C44H77O10P |
| PG(18:1_20:5) | 7.94E+02 | 7.95E+02 | [M-H]- | C44H75O10P |
| PG(18:1_22:6) | 8.20E+02 | 8.21E+02 | [M-H]- | C46H77O10P |
| PG(18:2_16:0) | 7.46E+02 | 7.47E+02 | [M-H]- | C40H75O10P |
| PG(18:2_16:1) | 7.43E+02 | 7.44E+02 | [M-H]- | C40H73O10P |
| PG(18:2_18:1) | 7.72E+02 | 7.73E+02 | [M-H]- | C42H77O10P |
| PG(18:2_18:2) | 7.70E+02 | 7.71E+02 | [M-H]- | C42H75O10P |
| PG(18:2_18:3) | 7.67E+02 | 7.68E+02 | [M-H]- | C42H73O10P |
| PG(18:2_21:2) | 8.12E+02 | 8.13E+02 | [M-H]- | C45H81O10P |
| PG(18:2_22:2) | 8.26E+02 | 8.27E+02 | [M-H]- | C46H83O10P |
| PG(18:2_22:6) | 8.18E+02 | 8.19E+02 | [M-H]- | C46H75O10P |
| PG(19:0_15:1) | 7.48E+02 | 7.49E+02 | [M-H]- | C40H77O10P |
| PG(19:0_20:1) | 8.18E+02 | 8.19E+02 | [M-H]- | C45H87O10P |
| PG(19:2_20:4) | 8.08E+02 | 8.09E+02 | [M-H]- | C45H77O10P |
| PG(20:0_20:4) | 8.26E+02 | 8.27E+02 | [M-H]- | C46H83O10P |
| PG(20:0_22:6) | 8.50E+02 | 8.51E+02 | [M-H]- | C48H83O10P |
| PG(20:1_18:1) | 8.02E+02 | 8.03E+02 | [M-H]- | C44H83O10P |
| PG(20:1_18:2) | 8.00E+02 | 8.01E+02 | [M-H]- | C44H81O10P |
| PG(20:1_20:3) | 8.26E+02 | 8.27E+02 | [M-H]- | C46H83O10P |
| PG(20:1_22:6) | 8.48E+02 | 8.49E+02 | [M-H]- | C48H81O10P |
| PG(20:2_22:6) | 8.46E+02 | 8.47E+02 | [M-H]- | C48H79O10P |
| PG(20:3_22:6) | 8.44E+02 | 8.45E+02 | [M-H]- | C48H77O10P |
| PG(20:4_20:4) | 8.18E+02 | 8.19E+02 | [M-H]- | C46H75O10P |
| PG(20:4_22:6) | 8.42E+02 | 8.43E+02 | [M-H]- | C48H75O10P |
| PG(22:0_18:1) | 8.32E+02 | 8.33E+02 | [M-H]- | C46H89O10P |
| PG(22:0_20:3) | 8.56E+02 | 8.57E+02 | [M-H]- | C48H89O10P |
| PG(22:0_20:4) | 8.54E+02 | 8.55E+02 | [M-H]- | C48H87O10P |
| PG(22:0_20:5) | 8.52E+02 | 8.53E+02 | [M-H]- | C48H85O10P |

|               |          |          |        |            |
|---------------|----------|----------|--------|------------|
| PG(22:0_22:4) | 8.82E+02 | 8.83E+02 | [M-H]- | C50H91O10P |
| PG(22:0_22:6) | 8.78E+02 | 8.79E+02 | [M-H]- | C50H87O10P |
| PG(22:1_18:2) | 8.28E+02 | 8.29E+02 | [M-H]- | C46H85O10P |
| PG(22:1_20:5) | 8.50E+02 | 8.51E+02 | [M-H]- | C48H83O10P |
| PG(22:5_22:6) | 8.68E+02 | 8.69E+02 | [M-H]- | C50H77O10P |
| PG(22:6_22:6) | 8.66E+02 | 8.67E+02 | [M-H]- | C50H75O10P |
| PG(24:0_20:4) | 8.82E+02 | 8.83E+02 | [M-H]- | C50H91O10P |
| PG(9:0_22:4)  | 6.99E+02 | 7.00E+02 | [M-H]- | C37H65O10P |
| PGD1          | 3.53E+02 | 3.54E+02 | [M-H]- | C20H34O5   |
| PGD2          | 3.51E+02 | 3.52E+02 | [M-H]- | C20H32O5   |
| PGE1          | 3.53E+02 | 3.54E+02 | [M-H]- | C20H34O5   |
| PGE2          | 3.51E+02 | 3.52E+02 | [M-H]- | C20H32O5   |
| PGF2 $\alpha$ | 3.53E+02 | 3.54E+02 | [M-H]- | C20H34O5   |
| PI(10:0_12:0) | 6.69E+02 | 6.70E+02 | [M-H]- | C31H59O13P |
| PI(10:0_16:0) | 7.25E+02 | 7.26E+02 | [M-H]- | C35H67O13P |
| PI(12:0_13:1) | 7.09E+02 | 7.10E+02 | [M-H]- | C34H63O13P |
| PI(12:0_18:0) | 7.81E+02 | 7.82E+02 | [M-H]- | C39H75O13P |
| PI(12:0_18:1) | 7.79E+02 | 7.80E+02 | [M-H]- | C39H73O13P |
| PI(12:0_22:4) | 8.29E+02 | 8.30E+02 | [M-H]- | C43H75O13P |
| PI(13:0_18:2) | 7.91E+02 | 7.92E+02 | [M-H]- | C40H73O13P |
| PI(13:0_20:4) | 8.15E+02 | 8.16E+02 | [M-H]- | C42H73O13P |
| PI(13:1_18:1) | 7.91E+02 | 7.92E+02 | [M-H]- | C40H73O13P |
| PI(14:0_19:0) | 8.24E+02 | 8.25E+02 | [M-H]- | C42H81O13P |
| PI(14:1_18:1) | 8.05E+02 | 8.06E+02 | [M-H]- | C41H75O13P |
| PI(14:1_24:2) | 8.88E+02 | 8.89E+02 | [M-H]- | C47H85O13P |
| PI(15:0_16:1) | 7.93E+02 | 7.94E+02 | [M-H]- | C40H75O13P |
| PI(15:0_19:2) | 8.34E+02 | 8.35E+02 | [M-H]- | C43H79O13P |
| PI(15:0_21:1) | 8.64E+02 | 8.65E+02 | [M-H]- | C45H85O13P |
| PI(15:0_22:4) | 8.72E+02 | 8.73E+02 | [M-H]- | C46H81O13P |
| PI(15:1_16:1) | 7.91E+02 | 7.92E+02 | [M-H]- | C40H73O13P |
| PI(15:1_18:1) | 8.20E+02 | 8.21E+02 | [M-H]- | C42H77O13P |
| PI(15:1_18:3) | 8.15E+02 | 8.16E+02 | [M-H]- | C42H73O13P |
| PI(15:1_20:4) | 8.41E+02 | 8.42E+02 | [M-H]- | C44H75O13P |
| PI(15:1_22:4) | 8.70E+02 | 8.71E+02 | [M-H]- | C46H79O13P |
| PI(16:0_16:1) | 8.08E+02 | 8.09E+02 | [M-H]- | C41H77O13P |
| PI(16:0_17:0) | 8.24E+02 | 8.25E+02 | [M-H]- | C42H81O13P |
| PI(16:0_17:1) | 8.22E+02 | 8.23E+02 | [M-H]- | C42H79O13P |
| PI(16:0_18:1) | 8.36E+02 | 8.37E+02 | [M-H]- | C43H81O13P |
| PI(16:0_18:3) | 8.32E+02 | 8.33E+02 | [M-H]- | C43H77O13P |
| PI(16:0_19:0) | 8.52E+02 | 8.53E+02 | [M-H]- | C44H85O13P |
| PI(16:0_20:3) | 8.60E+02 | 8.61E+02 | [M-H]- | C45H81O13P |
| PI(16:0_20:4) | 8.58E+02 | 8.59E+02 | [M-H]- | C45H79O13P |
| PI(16:0_20:5) | 8.56E+02 | 8.57E+02 | [M-H]- | C45H77O13P |
| PI(16:0_22:4) | 8.86E+02 | 8.87E+02 | [M-H]- | C47H83O13P |
| PI(16:0_22:6) | 8.82E+02 | 8.83E+02 | [M-H]- | C47H79O13P |
| PI(16:1_18:1) | 8.34E+02 | 8.35E+02 | [M-H]- | C43H79O13P |
| PI(16:1_22:3) | 8.86E+02 | 8.87E+02 | [M-H]- | C47H83O13P |
| PI(17:0_18:0) | 8.52E+02 | 8.53E+02 | [M-H]- | C44H85O13P |
| PI(17:0_18:1) | 8.50E+02 | 8.51E+02 | [M-H]- | C44H83O13P |
| PI(17:0_18:2) | 8.48E+02 | 8.49E+02 | [M-H]- | C44H81O13P |
| PI(17:0_20:4) | 8.72E+02 | 8.73E+02 | [M-H]- | C46H81O13P |
| PI(18:0_13:1) | 7.93E+02 | 7.94E+02 | [M-H]- | C40H75O13P |
| PI(18:0_14:1) | 8.08E+02 | 8.09E+02 | [M-H]- | C41H77O13P |
| PI(18:0_17:1) | 8.50E+02 | 8.51E+02 | [M-H]- | C44H83O13P |



|                  |          |          |        |             |
|------------------|----------|----------|--------|-------------|
| PI(18:0_18:1)    | 8.64E+02 | 8.65E+02 | [M-H]- | C45H85O13P  |
| PI(18:0_18:2)    | 8.62E+02 | 8.63E+02 | [M-H]- | C45H83O13P  |
| PI(18:0_19:0)    | 8.80E+02 | 8.81E+02 | [M-H]- | C46H89O13P  |
| PI(18:0_19:2)    | 8.76E+02 | 8.77E+02 | [M-H]- | C46H85O13P  |
| PI(18:0_20:0)    | 8.94E+02 | 8.95E+02 | [M-H]- | C47H91O13P  |
| PI(18:0_20:1)    | 8.92E+02 | 8.93E+02 | [M-H]- | C47H89O13P  |
| PI(18:0_20:3)    | 8.88E+02 | 8.89E+02 | [M-H]- | C47H85O13P  |
| PI(18:0_20:4)    | 8.86E+02 | 8.87E+02 | [M-H]- | C47H83O13P  |
| PI(18:0_20:5)    | 8.84E+02 | 8.85E+02 | [M-H]- | C47H81O13P  |
| PI(18:0_22:4)    | 9.14E+02 | 9.15E+02 | [M-H]- | C49H87O13P  |
| PI(18:0_22:5)    | 9.12E+02 | 9.13E+02 | [M-H]- | C49H85O13P  |
| PI(18:0_22:6)    | 9.10E+02 | 9.11E+02 | [M-H]- | C49H83O13P  |
| PI(18:1_18:1)    | 8.62E+02 | 8.63E+02 | [M-H]- | C45H83O13P  |
| PI(18:1_18:2)    | 8.60E+02 | 8.61E+02 | [M-H]- | C45H81O13P  |
| PI(18:1_20:4)    | 8.84E+02 | 8.85E+02 | [M-H]- | C47H81O13P  |
| PI(18:1_20:5)    | 8.82E+02 | 8.83E+02 | [M-H]- | C47H79O13P  |
| PI(18:1_22:6)    | 9.08E+02 | 9.09E+02 | [M-H]- | C49H81O13P  |
| PI(18:2_16:0)    | 8.34E+02 | 8.35E+02 | [M-H]- | C43H79O13P  |
| PI(18:2_16:1)    | 8.32E+02 | 8.35E+02 | [M-H]- | C43H79O13P  |
| PI(18:2_18:2)    | 8.58E+02 | 8.59E+02 | [M-H]- | C45H79O13P  |
| PI(18:2_18:3)    | 8.56E+02 | 8.57E+02 | [M-H]- | C45H77O13P  |
| PI(18:2_20:4)    | 8.82E+02 | 8.83E+02 | [M-H]- | C47H79O13P  |
| PI(19:0_16:1)    | 8.50E+02 | 8.51E+02 | [M-H]- | C44H83O13P  |
| PI(19:0_17:2)    | 8.62E+02 | 8.63E+02 | [M-H]- | C45H83O13P  |
| PI(19:0_18:1)    | 8.78E+02 | 8.79E+02 | [M-H]- | C46H87O13P  |
| PI(20:3_18:0)    | 8.88E+02 | 8.89E+02 | [M-H]- | C47H85O13P  |
| PI(20:3_18:1)    | 8.86E+02 | 8.87E+02 | [M-H]- | C47H83O13P  |
| PI(20:4_16:1)    | 8.56E+02 | 8.57E+02 | [M-H]- | C45H77O13P  |
| PI(20:4_18:1)    | 8.84E+02 | 8.85E+02 | [M-H]- | C47H81O13P  |
| PI(20:4_20:1)    | 9.12E+02 | 9.13E+02 | [M-H]- | C49H85O13P  |
| PI(20:4_20:4)    | 9.06E+02 | 9.07E+02 | [M-H]- | C49H79O13P  |
| PI(21:1_20:4)    | 9.26E+02 | 9.27E+02 | [M-H]- | C50H87O13P  |
| PMeOH(16:0_18:1) | 6.87E+02 | 6.89E+02 | [M-H]- | C38H73O8P   |
| PMeOH(18:0_18:1) | 7.16E+02 | 7.17E+02 | [M-H]- | C40H77O8P   |
| PMeOH(18:0_22:4) | 7.66E+02 | 7.67E+02 | [M-H]- | C44H79O8P   |
| PMeOH(18:1_18:1) | 7.14E+02 | 7.15E+02 | [M-H]- | C40H75O8P   |
| PMeOH(22:5_22:6) | 8.07E+02 | 8.09E+02 | [M-H]- | C48H73O8P   |
| PS(12:0_13:0)    | 6.36E+02 | 6.37E+02 | [M-H]- | C31H60NO10P |
| PS(12:0_15:0)    | 6.64E+02 | 6.65E+02 | [M-H]- | C33H64NO10P |
| PS(12:0_16:0)    | 6.78E+02 | 6.79E+02 | [M-H]- | C34H66NO10P |
| PS(13:0_17:2)    | 7.02E+02 | 7.03E+02 | [M-H]- | C36H66NO10P |
| PS(14:0_18:0)    | 7.34E+02 | 7.36E+02 | [M-H]- | C38H74NO10P |
| PS(14:0_19:0)    | 7.49E+02 | 7.50E+02 | [M-H]- | C39H76NO10P |
| PS(14:0_21:0)    | 7.77E+02 | 7.78E+02 | [M-H]- | C41H80NO10P |
| PS(15:0_16:0)    | 7.20E+02 | 7.21E+02 | [M-H]- | C37H72NO10P |
| PS(15:0_18:0)    | 7.49E+02 | 7.50E+02 | [M-H]- | C39H76NO10P |
| PS(15:0_18:2)    | 7.44E+02 | 7.50E+02 | [M-H]- | C39H76NO10P |
| PS(15:0_19:0)    | 7.63E+02 | 7.64E+02 | [M-H]- | C40H78NO10P |
| PS(15:0_20:4)    | 7.68E+02 | 7.78E+02 | [M-H]- | C41H80NO10P |
| PS(15:0_21:0)    | 7.91E+02 | 7.92E+02 | [M-H]- | C42H82NO10P |
| PS(15:0_22:6)    | 7.92E+02 | 7.93E+02 | [M-H]- | C43H72NO10P |
| PS(15:1_20:1)    | 7.73E+02 | 7.78E+02 | [M-H]- | C41H80NO10P |
| PS(15:1_22:5)    | 7.92E+02 | 7.93E+02 | [M-H]- | C43H72NO10P |
| PS(16:0_17:0)    | 7.49E+02 | 7.50E+02 | [M-H]- | C39H76NO10P |

|               |          |          |        |             |
|---------------|----------|----------|--------|-------------|
| PS(16:0_18:1) | 7.61E+02 | 7.62E+02 | [M-H]- | C40H76NO10P |
| PS(16:0_19:0) | 7.77E+02 | 7.78E+02 | [M-H]- | C41H80NO10P |
| PS(16:0_20:1) | 7.89E+02 | 7.90E+02 | [M-H]- | C42H80NO10P |
| PS(16:0_20:4) | 7.82E+02 | 7.84E+02 | [M-H]- | C42H74NO10P |
| PS(16:0_20:5) | 7.80E+02 | 7.81E+02 | [M-H]- | C42H72NO10P |
| PS(16:0_21:1) | 8.03E+02 | 8.04E+02 | [M-H]- | C43H82NO10P |
| PS(16:0_22:6) | 8.06E+02 | 8.08E+02 | [M-H]- | C44H74NO10P |
| PS(16:1_22:6) | 8.04E+02 | 8.18E+02 | [M-H]- | C44H84NO10P |
| PS(17:0_18:0) | 7.77E+02 | 7.78E+02 | [M-H]- | C41H80NO10P |
| PS(17:0_18:1) | 7.75E+02 | 7.78E+02 | [M-H]- | C41H80NO10P |
| PS(17:0_21:0) | 8.19E+02 | 7.91E+02 | [M-H]- | C43H70NO10P |
| PS(17:0_21:1) | 8.17E+02 | 8.18E+02 | [M-H]- | C44H84NO10P |
| PS(17:1_18:1) | 7.73E+02 | 7.78E+02 | [M-H]- | C41H80NO10P |
| PS(17:1_22:6) | 8.18E+02 | 8.30E+02 | [M-H]- | C45H84NO10P |
| PS(17:2_18:2) | 7.68E+02 | 7.78E+02 | [M-H]- | C41H80NO10P |
| PS(18:0_15:1) | 7.46E+02 | 7.50E+02 | [M-H]- | C39H76NO10P |
| PS(18:0_16:1) | 7.61E+02 | 7.62E+02 | [M-H]- | C40H76NO10P |
| PS(18:0_17:1) | 7.75E+02 | 7.76E+02 | [M-H]- | C41H78NO10P |
| PS(18:0_18:0) | 7.91E+02 | 7.92E+02 | [M-H]- | C42H82NO10P |
| PS(18:0_18:1) | 7.89E+02 | 7.90E+02 | [M-H]- | C42H80NO10P |
| PS(18:0_18:2) | 7.87E+02 | 7.88E+02 | [M-H]- | C42H78NO10P |
| PS(18:0_19:2) | 8.01E+02 | 8.02E+02 | [M-H]- | C43H80NO10P |
| PS(18:0_20:0) | 8.19E+02 | 7.91E+02 | [M-H]- | C43H70NO10P |
| PS(18:0_20:1) | 8.17E+02 | 8.18E+02 | [M-H]- | C44H84NO10P |
| PS(18:0_20:2) | 8.15E+02 | 8.18E+02 | [M-H]- | C44H84NO10P |
| PS(18:0_20:3) | 8.13E+02 | 8.14E+02 | [M-H]- | C44H80NO10P |
| PS(18:0_20:4) | 8.11E+02 | 8.12E+02 | [M-H]- | C44H78NO10P |
| PS(18:0_20:5) | 8.09E+02 | 8.10E+02 | [M-H]- | C44H76NO10P |
| PS(18:0_22:6) | 8.35E+02 | 8.36E+02 | [M-H]- | C46H78NO10P |
| PS(18:1_18:1) | 7.87E+02 | 7.88E+02 | [M-H]- | C42H78NO10P |
| PS(18:1_19:1) | 8.01E+02 | 8.02E+02 | [M-H]- | C43H80NO10P |
| PS(18:1_20:0) | 8.17E+02 | 8.18E+02 | [M-H]- | C44H84NO10P |
| PS(18:1_20:1) | 8.15E+02 | 8.16E+02 | [M-H]- | C44H82NO10P |
| PS(18:1_20:3) | 8.11E+02 | 8.18E+02 | [M-H]- | C44H84NO10P |
| PS(18:1_20:4) | 8.09E+02 | 8.18E+02 | [M-H]- | C44H84NO10P |
| PS(18:1_22:1) | 8.43E+02 | 8.44E+02 | [M-H]- | C46H86NO10P |
| PS(18:1_22:4) | 8.37E+02 | 8.25E+02 | [M-H]- | C46H68NO10P |
| PS(18:1_22:5) | 8.35E+02 | 8.25E+02 | [M-H]- | C46H68NO10P |
| PS(18:1_22:6) | 8.33E+02 | 8.34E+02 | [M-H]- | C46H76NO10P |
| PS(18:1_24:4) | 8.65E+02 | 8.66E+02 | [M-H]- | C48H84NO10P |
| PS(18:2_18:2) | 7.82E+02 | 7.86E+02 | [M-H]- | C42H76NO10P |
| PS(18:2_18:3) | 7.80E+02 | 7.86E+02 | [M-H]- | C42H76NO10P |
| PS(18:2_20:3) | 8.09E+02 | 8.18E+02 | [M-H]- | C44H84NO10P |
| PS(18:2_20:4) | 8.06E+02 | 8.18E+02 | [M-H]- | C44H84NO10P |
| PS(18:2_20:5) | 8.04E+02 | 8.18E+02 | [M-H]- | C44H84NO10P |
| PS(18:2_22:6) | 8.30E+02 | 8.25E+02 | [M-H]- | C46H68NO10P |
| PS(18:3_20:4) | 8.04E+02 | 8.18E+02 | [M-H]- | C44H84NO10P |
| PS(19:0_16:1) | 7.75E+02 | 7.78E+02 | [M-H]- | C41H80NO10P |
| PS(19:0_18:1) | 8.03E+02 | 8.04E+02 | [M-H]- | C43H82NO10P |
| PS(19:0_18:2) | 8.01E+02 | 8.02E+02 | [M-H]- | C43H80NO10P |
| PS(19:0_18:3) | 7.99E+02 | 8.00E+02 | [M-H]- | C43H78NO10P |
| PS(19:0_20:4) | 8.25E+02 | 8.26E+02 | [M-H]- | C45H80NO10P |
| PS(19:0_20:5) | 8.23E+02 | 8.24E+02 | [M-H]- | C45H78NO10P |
| PS(19:1_18:2) | 7.99E+02 | 8.00E+02 | [M-H]- | C43H78NO10P |

|                         |          |          |          |             |
|-------------------------|----------|----------|----------|-------------|
| PS(19:1_20:4)           | 8.23E+02 | 8.24E+02 | [M-H]-   | C45H78NO10P |
| PS(20:0_20:4)           | 8.39E+02 | 8.40E+02 | [M-H]-   | C46H82NO10P |
| PS(20:2_22:4)           | 8.63E+02 | 8.64E+02 | [M-H]-   | C48H82NO10P |
| PS(20:3_20:3)           | 8.35E+02 | 8.25E+02 | [M-H]-   | C46H68NO10P |
| PS(20:3_20:4)           | 8.33E+02 | 8.25E+02 | [M-H]-   | C46H68NO10P |
| PS(20:3_20:5)           | 8.30E+02 | 8.25E+02 | [M-H]-   | C46H68NO10P |
| PS(20:3_22:6)           | 8.57E+02 | 8.64E+02 | [M-H]-   | C48H82NO10P |
| PS(20:4_20:4)           | 8.30E+02 | 8.25E+02 | [M-H]-   | C46H68NO10P |
| PS(21:0_17:1)           | 8.17E+02 | 8.18E+02 | [M-H]-   | C44H84NO10P |
| PS(21:0_18:2)           | 8.29E+02 | 8.30E+02 | [M-H]-   | C45H84NO10P |
| PS(21:0_18:3)           | 8.27E+02 | 8.28E+02 | [M-H]-   | C45H82NO10P |
| PS(21:0_20:4)           | 8.53E+02 | 8.54E+02 | [M-H]-   | C47H84NO10P |
| PS(21:0_20:5)           | 8.51E+02 | 8.52E+02 | [M-H]-   | C47H82NO10P |
| PS(21:0_22:6)           | 8.77E+02 | 8.90E+02 | [M-H]-   | C49H96NO10P |
| PS(21:2_20:4)           | 8.49E+02 | 8.50E+02 | [M-H]-   | C47H80NO10P |
| PS(22:4_18:0)           | 8.39E+02 | 8.40E+02 | [M-H]-   | C46H82NO10P |
| SE(28:1_18:1)           | 6.83E+02 | 6.65E+02 | [M+NH4]+ | C46H80O2    |
| SE(28:1_18:2)           | 6.81E+02 | 6.63E+02 | [M+NH4]+ | C46H78O2    |
| SE(28:1_22:6)           | 7.29E+02 | 7.11E+02 | [M+NH4]+ | C50H78O2    |
| SHexCer(d18:1/16:0(OH)) | 7.97E+02 | 7.96E+02 | [M+H]+   | C40H77NO12S |
| SHexCer(d18:1/16:0)     | 7.81E+02 | 7.80E+02 | [M+H]+   | C40H77NO11S |
| SM(d18:0/14:0)          | 6.78E+02 | 6.77E+02 | [M+H]+   | C37H77N2O6P |
| SM(d18:0/16:0)          | 7.06E+02 | 7.05E+02 | [M+H]+   | C39H81N2O6P |
| SM(d18:0/18:0)          | 7.34E+02 | 7.33E+02 | [M+H]+   | C41H85N2O6P |
| SM(d18:0/20:0)          | 7.62E+02 | 7.61E+02 | [M+H]+   | C43H89N2O6P |
| SM(d18:0/22:0)          | 7.90E+02 | 7.89E+02 | [M+H]+   | C45H93N2O6P |
| SM(d18:1/12:0)          | 6.48E+02 | 6.47E+02 | [M+H]+   | C35H71N2O6P |
| SM(d18:1/14:0)          | 6.76E+02 | 6.75E+02 | [M+H]+   | C37H75N2O6P |
| SM(d18:1/15:0)          | 6.90E+02 | 6.89E+02 | [M+H]+   | C38H77N2O6P |
| SM(d18:1/16:0)          | 7.04E+02 | 7.03E+02 | [M+H]+   | C39H79N2O6P |
| SM(d18:1/16:1)          | 7.02E+02 | 7.01E+02 | [M+H]+   | C39H77N2O6P |
| SM(d18:1/17:0)          | 7.18E+02 | 7.17E+02 | [M+H]+   | C40H81N2O6P |
| SM(d18:1/17:1)          | 7.16E+02 | 7.15E+02 | [M+H]+   | C40H79N2O6P |
| SM(d18:1/18:0)          | 7.32E+02 | 7.31E+02 | [M+H]+   | C41H83N2O6P |
| SM(d18:1/18:1)          | 7.30E+02 | 7.29E+02 | [M+H]+   | C41H81N2O6P |
| SM(d18:1/19:0)          | 7.46E+02 | 7.45E+02 | [M+H]+   | C42H85N2O6P |
| SM(d18:1/19:1)          | 7.42E+02 | 7.41E+02 | [M+H]+   | C42H81N2O6P |
| SM(d18:1/20:0)          | 7.60E+02 | 7.59E+02 | [M+H]+   | C43H87N2O6P |
| SM(d18:1/20:1)          | 7.58E+02 | 7.57E+02 | [M+H]+   | C43H85N2O6P |
| SM(d18:1/21:0)          | 7.74E+02 | 7.73E+02 | [M+H]+   | C44H89N2O6P |
| SM(d18:1/21:1)          | 7.72E+02 | 7.71E+02 | [M+H]+   | C44H87N2O6P |
| SM(d18:1/22:0)          | 7.88E+02 | 7.87E+02 | [M+H]+   | C45H91N2O6P |
| SM(d18:1/22:1)          | 7.86E+02 | 7.85E+02 | [M+H]+   | C45H89N2O6P |
| SM(d18:1/23:0)          | 8.02E+02 | 8.01E+02 | [M+H]+   | C46H93N2O6P |
| SM(d18:1/23:1)          | 8.00E+02 | 7.99E+02 | [M+H]+   | C46H91N2O6P |
| SM(d18:1/24:0)          | 8.16E+02 | 8.15E+02 | [M+H]+   | C47H95N2O6P |
| SM(d18:1/24:1)          | 8.14E+02 | 8.13E+02 | [M+H]+   | C47H93N2O6P |
| SM(d18:1/25:0)          | 8.30E+02 | 8.29E+02 | [M+H]+   | C48H97N2O6P |
| SM(d18:1/25:1)          | 8.28E+02 | 8.27E+02 | [M+H]+   | C48H95N2O6P |
| SM(d18:1/26:0)          | 8.44E+02 | 8.43E+02 | [M+H]+   | C49H99N2O6P |
| SM(d18:1/26:1)          | 8.42E+02 | 8.41E+02 | [M+H]+   | C49H97N2O6P |
| SM(d18:2/14:0)          | 6.74E+02 | 6.73E+02 | [M+H]+   | C37H73N2O6P |
| SM(d18:2/18:1)          | 7.28E+02 | 7.27E+02 | [M+H]+   | C41H79N2O6P |
| SM(d18:2/20:1)          | 7.56E+02 | 7.55E+02 | [M+H]+   | C43H83N2O6P |

|                    |          |          |                      |             |
|--------------------|----------|----------|----------------------|-------------|
| SM(d18:2/22:1)     | 7.84E+02 | 7.83E+02 | [M+H] <sup>+</sup>   | C45H87N2O6P |
| SM(d18:2/23:1)     | 7.98E+02 | 7.97E+02 | [M+H] <sup>+</sup>   | C46H89N2O6P |
| SM(d18:2/24:1)     | 8.12E+02 | 8.11E+02 | [M+H] <sup>+</sup>   | C47H91N2O6P |
| SM(d18:2/24:2)     | 8.10E+02 | 8.09E+02 | [M+H] <sup>+</sup>   | C47H89N2O6P |
| SM(d18:2/24:3)     | 8.08E+02 | 8.07E+02 | [M+H] <sup>+</sup>   | C47H87N2O6P |
| SM(d18:2/25:1)     | 8.26E+02 | 8.25E+02 | [M+H] <sup>+</sup>   | C48H93N2O6P |
| SM(d18:2/26:1)     | 8.40E+02 | 8.39E+02 | [M+H] <sup>+</sup>   | C49H95N2O6P |
| SM(d20:0/24:1)     | 8.44E+02 | 8.43E+02 | [M+H] <sup>+</sup>   | C49H99N2O6P |
| SPH(d16:1)         | 2.72E+02 | 2.71E+02 | [M+H] <sup>+</sup>   | C16H33NO2   |
| SPH(d17:1)         | 2.86E+02 | 2.85E+02 | [M+H] <sup>+</sup>   | C17H35NO2   |
| SPH(d18:0)         | 3.02E+02 | 3.01E+02 | [M+H] <sup>+</sup>   | C18H39NO2   |
| SPH(d18:1)         | 3.00E+02 | 2.99E+02 | [M+H] <sup>+</sup>   | C18H37NO2   |
| SPH(d18:2)         | 2.98E+02 | 2.97E+02 | [M+H] <sup>+</sup>   | C18H35NO2   |
| TG(10:0_12:0_14:0) | 6.57E+02 | 6.39E+02 | [M+NH4] <sup>+</sup> | C39H74O6    |
| TG(10:0_14:0_16:0) | 7.13E+02 | 6.95E+02 | [M+NH4] <sup>+</sup> | C43H82O6    |
| TG(10:0_15:0_16:0) | 7.27E+02 | 7.09E+02 | [M+NH4] <sup>+</sup> | C44H84O6    |
| TG(10:0_16:0_12:0) | 6.85E+02 | 6.67E+02 | [M+NH4] <sup>+</sup> | C41H78O6    |
| TG(10:0_16:0_16:1) | 7.39E+02 | 7.21E+02 | [M+NH4] <sup>+</sup> | C45H84O6    |
| TG(10:0_16:0_18:1) | 7.67E+02 | 7.49E+02 | [M+NH4] <sup>+</sup> | C47H88O6    |
| TG(10:0_16:0_18:2) | 7.65E+02 | 7.47E+02 | [M+NH4] <sup>+</sup> | C47H86O6    |
| TG(10:0_16:0_18:3) | 7.63E+02 | 7.45E+02 | [M+NH4] <sup>+</sup> | C47H84O6    |
| TG(10:0_16:2_18:2) | 7.61E+02 | 7.43E+02 | [M+NH4] <sup>+</sup> | C47H82O6    |
| TG(10:0_18:1_18:2) | 7.91E+02 | 7.73E+02 | [M+NH4] <sup>+</sup> | C49H88O6    |
| TG(12:0_14:0_16:0) | 7.41E+02 | 7.23E+02 | [M+NH4] <sup>+</sup> | C45H86O6    |
| TG(12:0_14:0_16:1) | 7.39E+02 | 7.21E+02 | [M+NH4] <sup>+</sup> | C45H84O6    |
| TG(12:0_14:0_18:1) | 7.67E+02 | 7.49E+02 | [M+NH4] <sup>+</sup> | C47H88O6    |
| TG(12:0_14:0_18:2) | 7.65E+02 | 7.47E+02 | [M+NH4] <sup>+</sup> | C47H86O6    |
| TG(12:0_15:0_16:0) | 7.55E+02 | 7.37E+02 | [M+NH4] <sup>+</sup> | C46H88O6    |
| TG(12:0_15:0_18:1) | 7.81E+02 | 7.63E+02 | [M+NH4] <sup>+</sup> | C48H90O6    |
| TG(12:0_16:0_16:0) | 7.69E+02 | 7.51E+02 | [M+NH4] <sup>+</sup> | C47H90O6    |
| TG(12:0_16:0_16:1) | 7.67E+02 | 7.49E+02 | [M+NH4] <sup>+</sup> | C47H88O6    |
| TG(12:0_16:0_18:1) | 7.95E+02 | 7.77E+02 | [M+NH4] <sup>+</sup> | C49H92O6    |
| TG(12:0_16:0_18:2) | 7.93E+02 | 7.75E+02 | [M+NH4] <sup>+</sup> | C49H90O6    |
| TG(12:0_16:0_22:5) | 8.43E+02 | 8.25E+02 | [M+NH4] <sup>+</sup> | C53H92O6    |
| TG(12:0_16:0_22:6) | 8.41E+02 | 8.23E+02 | [M+NH4] <sup>+</sup> | C53H90O6    |
| TG(12:0_16:1_18:2) | 7.91E+02 | 7.73E+02 | [M+NH4] <sup>+</sup> | C49H88O6    |
| TG(12:0_18:1_18:3) | 8.17E+02 | 7.99E+02 | [M+NH4] <sup>+</sup> | C51H90O6    |
| TG(12:0_18:1_22:6) | 8.67E+02 | 8.49E+02 | [M+NH4] <sup>+</sup> | C55H92O6    |
| TG(12:0_18:2_18:2) | 8.17E+02 | 7.99E+02 | [M+NH4] <sup>+</sup> | C51H90O6    |
| TG(12:0_18:2_18:3) | 8.15E+02 | 7.97E+02 | [M+NH4] <sup>+</sup> | C51H88O6    |
| TG(13:0_14:0_16:0) | 7.55E+02 | 7.37E+02 | [M+NH4] <sup>+</sup> | C46H88O6    |
| TG(13:0_16:0_22:6) | 8.55E+02 | 8.37E+02 | [M+NH4] <sup>+</sup> | C54H92O6    |
| TG(13:0_18:1_18:2) | 8.33E+02 | 8.15E+02 | [M+NH4] <sup>+</sup> | C52H94O6    |
| TG(13:0_18:1_22:6) | 8.81E+02 | 8.63E+02 | [M+NH4] <sup>+</sup> | C56H94O6    |
| TG(13:0_20:2_20:5) | 8.81E+02 | 8.63E+02 | [M+NH4] <sup>+</sup> | C56H94O6    |
| TG(14:0_14:0_16:0) | 7.69E+02 | 7.51E+02 | [M+NH4] <sup>+</sup> | C47H90O6    |
| TG(14:0_14:0_16:1) | 7.67E+02 | 7.49E+02 | [M+NH4] <sup>+</sup> | C47H88O6    |
| TG(14:0_14:1_16:1) | 7.65E+02 | 7.47E+02 | [M+NH4] <sup>+</sup> | C47H86O6    |
| TG(14:0_14:1_18:1) | 7.93E+02 | 7.75E+02 | [M+NH4] <sup>+</sup> | C49H90O6    |
| TG(14:0_15:0_16:0) | 7.83E+02 | 7.65E+02 | [M+NH4] <sup>+</sup> | C48H92O6    |
| TG(14:0_15:0_16:1) | 7.81E+02 | 7.63E+02 | [M+NH4] <sup>+</sup> | C48H90O6    |
| TG(14:0_15:0_17:0) | 7.97E+02 | 7.79E+02 | [M+NH4] <sup>+</sup> | C49H94O6    |
| TG(14:0_15:0_18:1) | 8.09E+02 | 7.91E+02 | [M+NH4] <sup>+</sup> | C50H94O6    |
| TG(14:0_15:0_18:2) | 8.07E+02 | 7.89E+02 | [M+NH4] <sup>+</sup> | C50H92O6    |

|                    |          |          |          |           |
|--------------------|----------|----------|----------|-----------|
| TG(14:0_16:0_16:0) | 7.97E+02 | 7.79E+02 | [M+NH4]+ | C49H94O6  |
| TG(14:0_16:0_16:1) | 7.95E+02 | 7.77E+02 | [M+NH4]+ | C49H92O6  |
| TG(14:0_16:0_18:0) | 8.25E+02 | 8.07E+02 | [M+NH4]+ | C51H98O6  |
| TG(14:0_16:0_18:1) | 8.23E+02 | 8.05E+02 | [M+NH4]+ | C51H96O6  |
| TG(14:0_16:0_18:2) | 8.21E+02 | 8.03E+02 | [M+NH4]+ | C51H94O6  |
| TG(14:0_16:0_20:4) | 8.45E+02 | 8.27E+02 | [M+NH4]+ | C53H94O6  |
| TG(14:0_16:0_22:5) | 8.71E+02 | 8.53E+02 | [M+NH4]+ | C55H96O6  |
| TG(14:0_16:1_17:1) | 8.07E+02 | 7.89E+02 | [M+NH4]+ | C50H92O6  |
| TG(14:0_16:1_18:1) | 8.21E+02 | 8.03E+02 | [M+NH4]+ | C51H94O6  |
| TG(14:0_16:1_18:2) | 8.19E+02 | 8.01E+02 | [M+NH4]+ | C51H92O6  |
| TG(14:0_16:1_18:3) | 8.17E+02 | 7.99E+02 | [M+NH4]+ | C51H90O6  |
| TG(14:0_16:1_20:4) | 8.43E+02 | 8.25E+02 | [M+NH4]+ | C53H92O6  |
| TG(14:0_16:1_20:5) | 8.41E+02 | 8.23E+02 | [M+NH4]+ | C53H90O6  |
| TG(14:0_17:1_18:2) | 8.33E+02 | 8.15E+02 | [M+NH4]+ | C52H94O6  |
| TG(14:0_17:2_18:2) | 8.31E+02 | 8.13E+02 | [M+NH4]+ | C52H92O6  |
| TG(14:0_18:0_18:1) | 8.51E+02 | 8.33E+02 | [M+NH4]+ | C53H100O6 |
| TG(14:0_18:0_18:2) | 8.49E+02 | 8.31E+02 | [M+NH4]+ | C53H98O6  |
| TG(14:0_18:0_20:0) | 8.81E+02 | 8.63E+02 | [M+NH4]+ | C55H106O6 |
| TG(14:0_18:0_20:2) | 8.77E+02 | 8.59E+02 | [M+NH4]+ | C55H102O6 |
| TG(14:0_18:1_20:2) | 8.75E+02 | 8.57E+02 | [M+NH4]+ | C55H100O6 |
| TG(14:0_18:2_18:2) | 8.45E+02 | 8.27E+02 | [M+NH4]+ | C53H94O6  |
| TG(14:0_18:2_18:3) | 8.43E+02 | 8.25E+02 | [M+NH4]+ | C53H92O6  |
| TG(14:0_18:2_18:4) | 8.41E+02 | 8.23E+02 | [M+NH4]+ | C53H90O6  |
| TG(14:0_18:3_20:4) | 8.67E+02 | 8.49E+02 | [M+NH4]+ | C55H92O6  |
| TG(14:0_20:2_22:6) | 9.21E+02 | 9.03E+02 | [M+NH4]+ | C59H98O6  |
| TG(14:0_20:4_22:6) | 9.17E+02 | 8.99E+02 | [M+NH4]+ | C59H94O6  |
| TG(14:0_20:5_22:6) | 9.15E+02 | 8.97E+02 | [M+NH4]+ | C59H92O6  |
| TG(14:0_22:6_22:6) | 9.41E+02 | 9.23E+02 | [M+NH4]+ | C61H94O6  |
| TG(14:1_16:0_16:1) | 7.93E+02 | 7.75E+02 | [M+NH4]+ | C49H90O6  |
| TG(14:1_16:1_16:1) | 7.91E+02 | 7.73E+02 | [M+NH4]+ | C49H88O6  |
| TG(14:1_16:1_18:1) | 8.19E+02 | 8.01E+02 | [M+NH4]+ | C51H92O6  |
| TG(14:1_16:1_18:2) | 8.17E+02 | 7.99E+02 | [M+NH4]+ | C51H90O6  |
| TG(14:1_16:1_22:6) | 8.65E+02 | 8.47E+02 | [M+NH4]+ | C55H90O6  |
| TG(14:1_18:2_18:2) | 8.43E+02 | 8.25E+02 | [M+NH4]+ | C53H92O6  |
| TG(14:1_18:2_18:3) | 8.41E+02 | 8.23E+02 | [M+NH4]+ | C53H90O6  |
| TG(14:1_18:2_20:4) | 8.67E+02 | 8.49E+02 | [M+NH4]+ | C55H92O6  |
| TG(15:0_16:0_16:0) | 8.11E+02 | 7.93E+02 | [M+NH4]+ | C50H96O6  |
| TG(15:0_16:0_16:1) | 8.09E+02 | 7.91E+02 | [M+NH4]+ | C50H94O6  |
| TG(15:0_16:0_18:0) | 8.39E+02 | 8.21E+02 | [M+NH4]+ | C52H100O6 |
| TG(15:0_16:0_18:1) | 8.37E+02 | 8.19E+02 | [M+NH4]+ | C52H98O6  |
| TG(15:0_16:0_18:2) | 8.35E+02 | 8.17E+02 | [M+NH4]+ | C52H96O6  |
| TG(15:0_16:0_24:0) | 9.23E+02 | 9.05E+02 | [M+NH4]+ | C58H112O6 |
| TG(15:0_16:1_16:1) | 8.07E+02 | 7.89E+02 | [M+NH4]+ | C50H92O6  |
| TG(15:0_16:1_18:1) | 8.35E+02 | 8.17E+02 | [M+NH4]+ | C52H96O6  |
| TG(15:0_16:1_18:2) | 8.33E+02 | 8.15E+02 | [M+NH4]+ | C52H94O6  |
| TG(15:0_16:1_20:4) | 8.57E+02 | 8.39E+02 | [M+NH4]+ | C54H94O6  |
| TG(15:0_16:1_22:6) | 8.81E+02 | 8.63E+02 | [M+NH4]+ | C56H94O6  |
| TG(15:0_17:0_19:2) | 8.63E+02 | 8.45E+02 | [M+NH4]+ | C54H100O6 |
| TG(15:0_18:0_18:1) | 8.65E+02 | 8.47E+02 | [M+NH4]+ | C54H102O6 |
| TG(15:0_18:1_18:2) | 8.61E+02 | 8.43E+02 | [M+NH4]+ | C54H98O6  |
| TG(15:0_18:1_20:4) | 8.85E+02 | 8.67E+02 | [M+NH4]+ | C56H98O6  |
| TG(15:0_18:1_20:5) | 8.83E+02 | 8.65E+02 | [M+NH4]+ | C56H96O6  |
| TG(15:0_18:1_22:1) | 9.19E+02 | 9.01E+02 | [M+NH4]+ | C58H108O6 |
| TG(15:0_18:1_22:6) | 9.09E+02 | 8.91E+02 | [M+NH4]+ | C58H98O6  |

|                    |          |          |                      |           |
|--------------------|----------|----------|----------------------|-----------|
| TG(15:0_18:2_18:2) | 8.59E+02 | 8.41E+02 | [M+NH4] <sup>+</sup> | C54H96O6  |
| TG(15:0_18:2_18:3) | 8.57E+02 | 8.39E+02 | [M+NH4] <sup>+</sup> | C54H94O6  |
| TG(15:0_18:2_22:5) | 9.09E+02 | 8.91E+02 | [M+NH4] <sup>+</sup> | C58H98O6  |
| TG(15:0_19:2_19:2) | 8.87E+02 | 8.69E+02 | [M+NH4] <sup>+</sup> | C56H100O6 |
| TG(15:1_15:1_19:2) | 8.31E+02 | 8.13E+02 | [M+NH4] <sup>+</sup> | C52H92O6  |
| TG(15:1_17:1_17:1) | 8.33E+02 | 8.15E+02 | [M+NH4] <sup>+</sup> | C52H94O6  |
| TG(15:1_18:1_18:2) | 8.59E+02 | 8.41E+02 | [M+NH4] <sup>+</sup> | C54H96O6  |
| TG(15:1_18:2_22:6) | 9.05E+02 | 8.87E+02 | [M+NH4] <sup>+</sup> | C58H94O6  |
| TG(16:0_14:1_18:2) | 8.19E+02 | 8.01E+02 | [M+NH4] <sup>+</sup> | C51H92O6  |
| TG(16:0_15:1_18:2) | 8.33E+02 | 8.15E+02 | [M+NH4] <sup>+</sup> | C52H94O6  |
| TG(16:0_16:0_16:0) | 8.25E+02 | 8.07E+02 | [M+NH4] <sup>+</sup> | C51H98O6  |
| TG(16:0_16:0_16:1) | 8.23E+02 | 8.05E+02 | [M+NH4] <sup>+</sup> | C51H96O6  |
| TG(16:0_16:0_17:0) | 8.39E+02 | 8.21E+02 | [M+NH4] <sup>+</sup> | C52H100O6 |
| TG(16:0_16:0_18:0) | 8.53E+02 | 8.35E+02 | [M+NH4] <sup>+</sup> | C53H102O6 |
| TG(16:0_16:0_18:1) | 8.51E+02 | 8.33E+02 | [M+NH4] <sup>+</sup> | C53H100O6 |
| TG(16:0_16:0_20:2) | 8.77E+02 | 8.59E+02 | [M+NH4] <sup>+</sup> | C55H102O6 |
| TG(16:0_16:0_20:4) | 8.73E+02 | 8.55E+02 | [M+NH4] <sup>+</sup> | C55H98O6  |
| TG(16:0_16:0_22:6) | 8.97E+02 | 8.79E+02 | [M+NH4] <sup>+</sup> | C57H98O6  |
| TG(16:0_16:0_24:0) | 9.37E+02 | 9.19E+02 | [M+NH4] <sup>+</sup> | C59H114O6 |
| TG(16:0_16:1_16:1) | 8.21E+02 | 8.03E+02 | [M+NH4] <sup>+</sup> | C51H94O6  |
| TG(16:0_16:1_17:1) | 8.35E+02 | 8.17E+02 | [M+NH4] <sup>+</sup> | C52H96O6  |
| TG(16:0_16:1_18:1) | 8.49E+02 | 8.31E+02 | [M+NH4] <sup>+</sup> | C53H98O6  |
| TG(16:0_16:1_18:2) | 8.47E+02 | 8.29E+02 | [M+NH4] <sup>+</sup> | C53H96O6  |
| TG(16:0_16:1_18:3) | 8.45E+02 | 8.27E+02 | [M+NH4] <sup>+</sup> | C53H94O6  |
| TG(16:0_16:1_18:4) | 8.43E+02 | 8.25E+02 | [M+NH4] <sup>+</sup> | C53H92O6  |
| TG(16:0_16:1_20:0) | 8.79E+02 | 8.61E+02 | [M+NH4] <sup>+</sup> | C55H104O6 |
| TG(16:0_16:1_20:1) | 8.77E+02 | 8.59E+02 | [M+NH4] <sup>+</sup> | C55H102O6 |
| TG(16:0_16:1_20:4) | 8.71E+02 | 8.53E+02 | [M+NH4] <sup>+</sup> | C55H96O6  |
| TG(16:0_16:1_20:5) | 8.69E+02 | 8.51E+02 | [M+NH4] <sup>+</sup> | C55H94O6  |
| TG(16:0_16:1_22:1) | 9.05E+02 | 8.87E+02 | [M+NH4] <sup>+</sup> | C57H106O6 |
| TG(16:0_16:1_22:5) | 8.97E+02 | 8.79E+02 | [M+NH4] <sup>+</sup> | C57H98O6  |
| TG(16:0_16:1_22:6) | 8.95E+02 | 8.77E+02 | [M+NH4] <sup>+</sup> | C57H96O6  |
| TG(16:0_16:2_18:3) | 8.43E+02 | 8.25E+02 | [M+NH4] <sup>+</sup> | C53H92O6  |
| TG(16:0_17:0_18:0) | 8.67E+02 | 8.49E+02 | [M+NH4] <sup>+</sup> | C54H104O6 |
| TG(16:0_17:0_18:1) | 8.65E+02 | 8.47E+02 | [M+NH4] <sup>+</sup> | C54H102O6 |
| TG(16:0_17:0_22:5) | 9.13E+02 | 8.95E+02 | [M+NH4] <sup>+</sup> | C58H102O6 |
| TG(16:0_17:0_22:6) | 9.11E+02 | 8.93E+02 | [M+NH4] <sup>+</sup> | C58H100O6 |
| TG(16:0_17:1_18:1) | 8.63E+02 | 8.45E+02 | [M+NH4] <sup>+</sup> | C54H100O6 |
| TG(16:0_17:1_18:2) | 8.61E+02 | 8.43E+02 | [M+NH4] <sup>+</sup> | C54H98O6  |
| TG(16:0_17:1_20:4) | 8.85E+02 | 8.67E+02 | [M+NH4] <sup>+</sup> | C56H98O6  |
| TG(16:0_17:1_22:6) | 9.09E+02 | 8.91E+02 | [M+NH4] <sup>+</sup> | C58H98O6  |
| TG(16:0_17:2_20:4) | 8.83E+02 | 8.65E+02 | [M+NH4] <sup>+</sup> | C56H96O6  |
| TG(16:0_18:0_18:0) | 8.81E+02 | 8.63E+02 | [M+NH4] <sup>+</sup> | C55H106O6 |
| TG(16:0_18:0_18:1) | 8.79E+02 | 8.61E+02 | [M+NH4] <sup>+</sup> | C55H104O6 |
| TG(16:0_18:0_18:2) | 8.77E+02 | 8.59E+02 | [M+NH4] <sup>+</sup> | C55H102O6 |
| TG(16:0_18:0_20:0) | 9.09E+02 | 8.91E+02 | [M+NH4] <sup>+</sup> | C57H110O6 |
| TG(16:0_18:0_20:1) | 9.07E+02 | 8.89E+02 | [M+NH4] <sup>+</sup> | C57H108O6 |
| TG(16:0_18:0_20:4) | 9.01E+02 | 8.83E+02 | [M+NH4] <sup>+</sup> | C57H102O6 |
| TG(16:0_18:0_22:0) | 9.37E+02 | 9.19E+02 | [M+NH4] <sup>+</sup> | C59H114O6 |
| TG(16:0_18:0_22:6) | 9.25E+02 | 9.07E+02 | [M+NH4] <sup>+</sup> | C59H102O6 |
| TG(16:0_18:1_18:1) | 8.77E+02 | 8.59E+02 | [M+NH4] <sup>+</sup> | C55H102O6 |
| TG(16:0_18:1_18:2) | 8.75E+02 | 8.57E+02 | [M+NH4] <sup>+</sup> | C55H100O6 |
| TG(16:0_18:1_19:1) | 8.91E+02 | 8.73E+02 | [M+NH4] <sup>+</sup> | C56H104O6 |
| TG(16:0_18:1_20:1) | 9.05E+02 | 8.87E+02 | [M+NH4] <sup>+</sup> | C57H106O6 |

|                    |          |          |          |           |
|--------------------|----------|----------|----------|-----------|
| TG(16:0_18:1_20:2) | 9.03E+02 | 8.85E+02 | [M+NH4]+ | C57H104O6 |
| TG(16:0_18:1_20:4) | 8.99E+02 | 8.81E+02 | [M+NH4]+ | C57H100O6 |
| TG(16:0_18:1_22:0) | 9.35E+02 | 9.17E+02 | [M+NH4]+ | C59H112O6 |
| TG(16:0_18:1_22:1) | 9.33E+02 | 9.15E+02 | [M+NH4]+ | C59H110O6 |
| TG(16:0_18:1_22:3) | 9.29E+02 | 9.11E+02 | [M+NH4]+ | C59H106O6 |
| TG(16:0_18:1_22:4) | 9.27E+02 | 9.09E+02 | [M+NH4]+ | C59H104O6 |
| TG(16:0_18:1_22:5) | 9.25E+02 | 9.07E+02 | [M+NH4]+ | C59H102O6 |
| TG(16:0_18:1_22:6) | 9.23E+02 | 9.05E+02 | [M+NH4]+ | C59H100O6 |
| TG(16:0_18:1_24:1) | 9.61E+02 | 9.43E+02 | [M+NH4]+ | C61H114O6 |
| TG(16:0_18:1_24:4) | 9.55E+02 | 9.37E+02 | [M+NH4]+ | C61H108O6 |
| TG(16:0_18:2_16:4) | 8.41E+02 | 8.23E+02 | [M+NH4]+ | C53H90O6  |
| TG(16:0_18:2_18:2) | 8.73E+02 | 8.55E+02 | [M+NH4]+ | C55H98O6  |
| TG(16:0_18:2_18:3) | 8.71E+02 | 8.53E+02 | [M+NH4]+ | C55H96O6  |
| TG(16:0_18:2_18:4) | 8.69E+02 | 8.51E+02 | [M+NH4]+ | C55H94O6  |
| TG(16:0_18:2_20:4) | 8.97E+02 | 8.79E+02 | [M+NH4]+ | C57H98O6  |
| TG(16:0_18:2_20:5) | 8.95E+02 | 8.77E+02 | [M+NH4]+ | C57H96O6  |
| TG(16:0_18:2_22:6) | 9.21E+02 | 9.03E+02 | [M+NH4]+ | C59H98O6  |
| TG(16:0_18:5_20:5) | 8.89E+02 | 8.71E+02 | [M+NH4]+ | C57H90O6  |
| TG(16:0_19:1_20:2) | 9.17E+02 | 8.99E+02 | [M+NH4]+ | C58H106O6 |
| TG(16:0_19:2_20:4) | 9.11E+02 | 8.93E+02 | [M+NH4]+ | C58H100O6 |
| TG(16:0_20:0_18:1) | 9.07E+02 | 8.89E+02 | [M+NH4]+ | C57H108O6 |
| TG(16:0_20:0_22:6) | 9.53E+02 | 9.35E+02 | [M+NH4]+ | C61H106O6 |
| TG(16:0_20:1_18:2) | 9.03E+02 | 8.85E+02 | [M+NH4]+ | C57H104O6 |
| TG(16:0_20:2_22:5) | 9.51E+02 | 9.33E+02 | [M+NH4]+ | C61H104O6 |
| TG(16:0_20:2_22:6) | 9.49E+02 | 9.31E+02 | [M+NH4]+ | C61H102O6 |
| TG(16:0_20:3_24:5) | 9.77E+02 | 9.59E+02 | [M+NH4]+ | C63H106O6 |
| TG(16:0_20:4_22:5) | 9.47E+02 | 9.29E+02 | [M+NH4]+ | C61H100O6 |
| TG(16:0_20:4_22:6) | 9.45E+02 | 9.27E+02 | [M+NH4]+ | C61H98O6  |
| TG(16:0_20:4_24:6) | 9.73E+02 | 9.55E+02 | [M+NH4]+ | C63H102O6 |
| TG(16:0_22:1_18:2) | 9.31E+02 | 9.13E+02 | [M+NH4]+ | C59H108O6 |
| TG(16:0_22:5_22:6) | 9.71E+02 | 9.53E+02 | [M+NH4]+ | C63H100O6 |
| TG(16:0_22:6_22:6) | 9.69E+02 | 9.51E+02 | [M+NH4]+ | C63H98O6  |
| TG(16:0_24:0_18:1) | 9.63E+02 | 9.45E+02 | [M+NH4]+ | C61H116O6 |
| TG(16:1_16:1_16:2) | 8.17E+02 | 7.99E+02 | [M+NH4]+ | C51H90O6  |
| TG(16:1_16:1_17:1) | 8.33E+02 | 8.15E+02 | [M+NH4]+ | C52H94O6  |
| TG(16:1_16:1_18:1) | 8.47E+02 | 8.29E+02 | [M+NH4]+ | C53H96O6  |
| TG(16:1_16:1_18:2) | 8.45E+02 | 8.27E+02 | [M+NH4]+ | C53H94O6  |
| TG(16:1_16:1_18:3) | 8.43E+02 | 8.25E+02 | [M+NH4]+ | C53H92O6  |
| TG(16:1_16:1_20:5) | 8.67E+02 | 8.49E+02 | [M+NH4]+ | C55H92O6  |
| TG(16:1_16:1_22:6) | 8.93E+02 | 8.75E+02 | [M+NH4]+ | C57H94O6  |
| TG(16:1_16:1_24:5) | 9.23E+02 | 9.05E+02 | [M+NH4]+ | C59H100O6 |
| TG(16:1_16:1_24:6) | 9.21E+02 | 9.03E+02 | [M+NH4]+ | C59H98O6  |
| TG(16:1_16:2_18:2) | 8.43E+02 | 8.25E+02 | [M+NH4]+ | C53H92O6  |
| TG(16:1_16:2_22:6) | 8.91E+02 | 8.73E+02 | [M+NH4]+ | C57H92O6  |
| TG(16:1_17:1_18:1) | 8.61E+02 | 8.43E+02 | [M+NH4]+ | C54H98O6  |
| TG(16:1_17:1_18:2) | 8.59E+02 | 8.41E+02 | [M+NH4]+ | C54H96O6  |
| TG(16:1_17:1_18:3) | 8.57E+02 | 8.39E+02 | [M+NH4]+ | C54H94O6  |
| TG(16:1_17:1_22:6) | 9.07E+02 | 8.89E+02 | [M+NH4]+ | C58H96O6  |
| TG(16:1_18:0_20:1) | 9.05E+02 | 8.87E+02 | [M+NH4]+ | C57H106O6 |
| TG(16:1_18:1_16:3) | 8.43E+02 | 8.25E+02 | [M+NH4]+ | C53H92O6  |
| TG(16:1_18:1_16:4) | 8.41E+02 | 8.23E+02 | [M+NH4]+ | C53H90O6  |
| TG(16:1_18:1_18:1) | 8.75E+02 | 8.57E+02 | [M+NH4]+ | C55H100O6 |
| TG(16:1_18:1_18:2) | 8.73E+02 | 8.55E+02 | [M+NH4]+ | C55H98O6  |
| TG(16:1_18:1_18:3) | 8.71E+02 | 8.53E+02 | [M+NH4]+ | C55H96O6  |

|                    |          |          |          |           |
|--------------------|----------|----------|----------|-----------|
| TG(16:1_18:1_20:3) | 8.99E+02 | 8.81E+02 | [M+NH4]+ | C57H100O6 |
| TG(16:1_18:1_20:5) | 8.95E+02 | 8.77E+02 | [M+NH4]+ | C57H96O6  |
| TG(16:1_18:1_22:1) | 9.31E+02 | 9.13E+02 | [M+NH4]+ | C59H108O6 |
| TG(16:1_18:1_22:2) | 9.29E+02 | 9.11E+02 | [M+NH4]+ | C59H106O6 |
| TG(16:1_18:1_22:6) | 9.21E+02 | 9.03E+02 | [M+NH4]+ | C59H98O6  |
| TG(16:1_18:2_18:2) | 8.71E+02 | 8.53E+02 | [M+NH4]+ | C55H96O6  |
| TG(16:1_18:2_18:3) | 8.69E+02 | 8.51E+02 | [M+NH4]+ | C55H94O6  |
| TG(16:1_18:2_22:6) | 9.19E+02 | 9.01E+02 | [M+NH4]+ | C59H96O6  |
| TG(16:1_18:3_20:4) | 8.93E+02 | 8.75E+02 | [M+NH4]+ | C57H94O6  |
| TG(16:1_20:4_20:5) | 9.17E+02 | 8.99E+02 | [M+NH4]+ | C59H94O6  |
| TG(16:2_18:2_18:3) | 8.67E+02 | 8.49E+02 | [M+NH4]+ | C55H92O6  |
| TG(17:0_17:0_19:1) | 8.93E+02 | 8.75E+02 | [M+NH4]+ | C56H106O6 |
| TG(17:0_18:0_18:0) | 8.95E+02 | 8.77E+02 | [M+NH4]+ | C56H108O6 |
| TG(17:0_18:0_18:1) | 8.93E+02 | 8.75E+02 | [M+NH4]+ | C56H106O6 |
| TG(17:0_18:1_18:1) | 8.91E+02 | 8.73E+02 | [M+NH4]+ | C56H104O6 |
| TG(17:0_18:1_18:2) | 8.89E+02 | 8.71E+02 | [M+NH4]+ | C56H102O6 |
| TG(17:0_18:1_20:1) | 9.19E+02 | 9.01E+02 | [M+NH4]+ | C58H108O6 |
| TG(17:0_18:1_20:3) | 9.15E+02 | 8.97E+02 | [M+NH4]+ | C58H104O6 |
| TG(17:0_18:1_20:4) | 9.13E+02 | 8.95E+02 | [M+NH4]+ | C58H102O6 |
| TG(17:0_18:1_22:6) | 9.37E+02 | 9.19E+02 | [M+NH4]+ | C60H102O6 |
| TG(17:0_18:2_18:3) | 8.85E+02 | 8.67E+02 | [M+NH4]+ | C56H98O6  |
| TG(17:0_18:2_22:6) | 9.35E+02 | 9.17E+02 | [M+NH4]+ | C60H100O6 |
| TG(17:0_18:3_18:3) | 8.83E+02 | 8.65E+02 | [M+NH4]+ | C56H96O6  |
| TG(17:0_19:2_19:2) | 9.15E+02 | 8.97E+02 | [M+NH4]+ | C58H104O6 |
| TG(17:1_17:1_24:6) | 9.49E+02 | 9.31E+02 | [M+NH4]+ | C61H102O6 |
| TG(17:1_18:1_18:1) | 8.89E+02 | 8.71E+02 | [M+NH4]+ | C56H102O6 |
| TG(17:1_18:1_18:2) | 8.87E+02 | 8.69E+02 | [M+NH4]+ | C56H100O6 |
| TG(17:1_18:1_20:1) | 9.17E+02 | 8.99E+02 | [M+NH4]+ | C58H106O6 |
| TG(17:1_18:1_20:2) | 9.15E+02 | 8.97E+02 | [M+NH4]+ | C58H104O6 |
| TG(17:1_18:1_20:4) | 9.11E+02 | 8.93E+02 | [M+NH4]+ | C58H100O6 |
| TG(17:1_18:2_18:2) | 8.85E+02 | 8.67E+02 | [M+NH4]+ | C56H98O6  |
| TG(17:1_18:2_18:3) | 8.83E+02 | 8.65E+02 | [M+NH4]+ | C56H96O6  |
| TG(17:1_18:2_22:6) | 9.33E+02 | 9.15E+02 | [M+NH4]+ | C60H98O6  |
| TG(17:1_19:2_19:2) | 9.13E+02 | 8.95E+02 | [M+NH4]+ | C58H102O6 |
| TG(17:2_18:2_22:6) | 9.31E+02 | 9.13E+02 | [M+NH4]+ | C60H96O6  |
| TG(18:0_16:1_20:1) | 9.05E+02 | 8.87E+02 | [M+NH4]+ | C57H106O6 |
| TG(18:0_16:1_24:6) | 9.51E+02 | 9.33E+02 | [M+NH4]+ | C61H104O6 |
| TG(18:0_16:2_20:2) | 9.01E+02 | 8.83E+02 | [M+NH4]+ | C57H102O6 |
| TG(18:0_17:1_18:1) | 8.91E+02 | 8.73E+02 | [M+NH4]+ | C56H104O6 |
| TG(18:0_18:0_18:0) | 9.09E+02 | 8.91E+02 | [M+NH4]+ | C57H110O6 |
| TG(18:0_18:0_18:1) | 9.07E+02 | 8.89E+02 | [M+NH4]+ | C57H108O6 |
| TG(18:0_18:0_22:6) | 9.53E+02 | 9.35E+02 | [M+NH4]+ | C61H106O6 |
| TG(18:0_18:1_18:1) | 9.05E+02 | 8.87E+02 | [M+NH4]+ | C57H106O6 |
| TG(18:0_18:1_18:2) | 9.03E+02 | 8.85E+02 | [M+NH4]+ | C57H104O6 |
| TG(18:0_18:1_19:1) | 9.19E+02 | 9.01E+02 | [M+NH4]+ | C58H108O6 |
| TG(18:0_18:1_20:0) | 9.35E+02 | 9.17E+02 | [M+NH4]+ | C59H112O6 |
| TG(18:0_18:1_20:1) | 9.33E+02 | 9.15E+02 | [M+NH4]+ | C59H110O6 |
| TG(18:0_18:1_20:3) | 9.29E+02 | 9.11E+02 | [M+NH4]+ | C59H106O6 |
| TG(18:0_18:1_20:4) | 9.27E+02 | 9.09E+02 | [M+NH4]+ | C59H104O6 |
| TG(18:0_18:1_22:4) | 9.55E+02 | 9.37E+02 | [M+NH4]+ | C61H108O6 |
| TG(18:0_18:1_22:5) | 9.53E+02 | 9.35E+02 | [M+NH4]+ | C61H106O6 |
| TG(18:0_18:1_22:6) | 9.51E+02 | 9.33E+02 | [M+NH4]+ | C61H104O6 |
| TG(18:0_18:2_20:0) | 9.33E+02 | 9.15E+02 | [M+NH4]+ | C59H110O6 |
| TG(18:0_18:2_20:2) | 9.29E+02 | 9.11E+02 | [M+NH4]+ | C59H106O6 |



|                    |          |          |          |           |
|--------------------|----------|----------|----------|-----------|
| TG(18:0_18:2_20:4) | 9.25E+02 | 9.07E+02 | [M+NH4]+ | C59H102O6 |
| TG(18:0_18:2_22:4) | 9.53E+02 | 9.35E+02 | [M+NH4]+ | C61H106O6 |
| TG(18:0_18:2_22:6) | 9.49E+02 | 9.31E+02 | [M+NH4]+ | C61H102O6 |
| TG(18:0_18:3_20:2) | 9.27E+02 | 9.09E+02 | [M+NH4]+ | C59H104O6 |
| TG(18:0_20:0_22:0) | 9.93E+02 | 9.75E+02 | [M+NH4]+ | C63H122O6 |
| TG(18:0_20:1_22:0) | 9.91E+02 | 9.73E+02 | [M+NH4]+ | C63H120O6 |
| TG(18:0_20:2_18:3) | 9.27E+02 | 9.09E+02 | [M+NH4]+ | C59H104O6 |
| TG(18:0_20:3_22:6) | 9.75E+02 | 9.57E+02 | [M+NH4]+ | C63H104O6 |
| TG(18:0_20:4_22:5) | 9.75E+02 | 9.57E+02 | [M+NH4]+ | C63H104O6 |
| TG(18:0_20:4_22:6) | 9.73E+02 | 9.55E+02 | [M+NH4]+ | C63H102O6 |
| TG(18:0_22:0_18:2) | 9.61E+02 | 9.43E+02 | [M+NH4]+ | C61H114O6 |
| TG(18:1_16:2_20:5) | 8.93E+02 | 8.75E+02 | [M+NH4]+ | C57H94O6  |
| TG(18:1_17:2_18:2) | 8.85E+02 | 8.67E+02 | [M+NH4]+ | C56H98O6  |
| TG(18:1_17:2_19:2) | 8.99E+02 | 8.81E+02 | [M+NH4]+ | C57H100O6 |
| TG(18:1_18:1_18:1) | 9.03E+02 | 8.85E+02 | [M+NH4]+ | C57H104O6 |
| TG(18:1_18:1_18:2) | 9.01E+02 | 8.83E+02 | [M+NH4]+ | C57H102O6 |
| TG(18:1_18:1_19:1) | 9.17E+02 | 8.99E+02 | [M+NH4]+ | C58H106O6 |
| TG(18:1_18:1_20:1) | 9.31E+02 | 9.13E+02 | [M+NH4]+ | C59H108O6 |
| TG(18:1_18:1_22:1) | 9.59E+02 | 9.41E+02 | [M+NH4]+ | C61H112O6 |
| TG(18:1_18:1_22:2) | 9.57E+02 | 9.39E+02 | [M+NH4]+ | C61H110O6 |
| TG(18:1_18:1_22:4) | 9.53E+02 | 9.35E+02 | [M+NH4]+ | C61H106O6 |
| TG(18:1_18:1_22:6) | 9.49E+02 | 9.31E+02 | [M+NH4]+ | C61H102O6 |
| TG(18:1_18:1_24:4) | 9.81E+02 | 9.63E+02 | [M+NH4]+ | C63H110O6 |
| TG(18:1_18:2_18:2) | 8.99E+02 | 8.81E+02 | [M+NH4]+ | C57H100O6 |
| TG(18:1_18:2_18:3) | 8.97E+02 | 8.79E+02 | [M+NH4]+ | C57H98O6  |
| TG(18:1_18:2_18:4) | 8.95E+02 | 8.77E+02 | [M+NH4]+ | C57H96O6  |
| TG(18:1_18:2_19:2) | 9.13E+02 | 8.95E+02 | [M+NH4]+ | C58H102O6 |
| TG(18:1_18:2_20:0) | 9.31E+02 | 9.13E+02 | [M+NH4]+ | C59H108O6 |
| TG(18:1_18:2_20:1) | 9.29E+02 | 9.11E+02 | [M+NH4]+ | C59H106O6 |
| TG(18:1_18:2_20:2) | 9.27E+02 | 9.09E+02 | [M+NH4]+ | C59H104O6 |
| TG(18:1_18:2_20:4) | 9.23E+02 | 9.05E+02 | [M+NH4]+ | C59H100O6 |
| TG(18:1_18:2_22:0) | 9.59E+02 | 9.41E+02 | [M+NH4]+ | C61H112O6 |
| TG(18:1_18:2_22:2) | 9.55E+02 | 9.37E+02 | [M+NH4]+ | C61H108O6 |
| TG(18:1_18:2_22:3) | 9.53E+02 | 9.35E+02 | [M+NH4]+ | C61H106O6 |
| TG(18:1_18:2_22:4) | 9.51E+02 | 9.33E+02 | [M+NH4]+ | C61H104O6 |
| TG(18:1_18:2_22:5) | 9.49E+02 | 9.31E+02 | [M+NH4]+ | C61H102O6 |
| TG(18:1_18:2_22:6) | 9.47E+02 | 9.29E+02 | [M+NH4]+ | C61H100O6 |
| TG(18:1_18:2_24:5) | 9.77E+02 | 9.59E+02 | [M+NH4]+ | C63H106O6 |
| TG(18:1_18:3_20:5) | 9.19E+02 | 9.01E+02 | [M+NH4]+ | C59H96O6  |
| TG(18:1_18:3_22:3) | 9.51E+02 | 9.33E+02 | [M+NH4]+ | C61H104O6 |
| TG(18:1_19:1_18:3) | 9.13E+02 | 8.95E+02 | [M+NH4]+ | C58H102O6 |
| TG(18:1_19:1_22:6) | 9.63E+02 | 9.45E+02 | [M+NH4]+ | C62H104O6 |
| TG(18:1_20:1_20:1) | 9.59E+02 | 9.41E+02 | [M+NH4]+ | C61H112O6 |
| TG(18:1_20:1_20:2) | 9.57E+02 | 9.39E+02 | [M+NH4]+ | C61H110O6 |
| TG(18:1_20:1_22:1) | 9.87E+02 | 9.69E+02 | [M+NH4]+ | C63H116O6 |
| TG(18:1_20:1_22:6) | 9.77E+02 | 9.59E+02 | [M+NH4]+ | C63H106O6 |
| TG(18:1_20:2_18:3) | 9.25E+02 | 9.07E+02 | [M+NH4]+ | C59H102O6 |
| TG(18:1_20:2_22:4) | 9.79E+02 | 9.61E+02 | [M+NH4]+ | C63H108O6 |
| TG(18:1_20:3_22:4) | 9.77E+02 | 9.59E+02 | [M+NH4]+ | C63H106O6 |
| TG(18:1_20:3_22:6) | 9.73E+02 | 9.55E+02 | [M+NH4]+ | C63H102O6 |
| TG(18:1_20:4_22:5) | 9.73E+02 | 9.55E+02 | [M+NH4]+ | C63H102O6 |
| TG(18:1_20:4_22:6) | 9.71E+02 | 9.53E+02 | [M+NH4]+ | C63H100O6 |
| TG(18:1_20:5_22:5) | 9.71E+02 | 9.53E+02 | [M+NH4]+ | C63H100O6 |
| TG(18:1_22:1_18:2) | 9.57E+02 | 9.39E+02 | [M+NH4]+ | C61H110O6 |

|                            |          |          |          |            |
|----------------------------|----------|----------|----------|------------|
| TG(18:1_22:5_22:6)         | 9.97E+02 | 9.79E+02 | [M+NH4]+ | C65H102O6  |
| TG(18:1_24:1_18:2)         | 9.85E+02 | 9.67E+02 | [M+NH4]+ | C63H114O6  |
| TG(18:2_18:2_18:3)         | 8.95E+02 | 8.77E+02 | [M+NH4]+ | C57H96O6   |
| TG(18:2_18:2_20:1)         | 9.27E+02 | 9.09E+02 | [M+NH4]+ | C59H104O6  |
| TG(18:2_18:2_20:2)         | 9.25E+02 | 9.07E+02 | [M+NH4]+ | C59H102O6  |
| TG(18:2_18:2_22:1)         | 9.55E+02 | 9.37E+02 | [M+NH4]+ | C61H108O6  |
| TG(18:2_18:2_22:4)         | 9.49E+02 | 9.31E+02 | [M+NH4]+ | C61H102O6  |
| TG(18:2_18:2_22:6)         | 9.45E+02 | 9.27E+02 | [M+NH4]+ | C61H98O6   |
| TG(18:2_18:2_24:5)         | 9.75E+02 | 9.57E+02 | [M+NH4]+ | C63H104O6  |
| TG(18:2_18:3_18:3)         | 8.93E+02 | 8.75E+02 | [M+NH4]+ | C57H94O6   |
| TG(18:2_18:3_18:4)         | 8.91E+02 | 8.73E+02 | [M+NH4]+ | C57H92O6   |
| TG(18:2_18:3_20:4)         | 9.19E+02 | 9.01E+02 | [M+NH4]+ | C59H96O6   |
| TG(18:2_18:3_20:5)         | 9.17E+02 | 8.99E+02 | [M+NH4]+ | C59H94O6   |
| TG(18:2_18:3_22:6)         | 9.43E+02 | 9.25E+02 | [M+NH4]+ | C61H96O6   |
| TG(18:2_20:2_22:6)         | 9.73E+02 | 9.55E+02 | [M+NH4]+ | C63H102O6  |
| TG(18:2_20:3_20:4)         | 9.47E+02 | 9.29E+02 | [M+NH4]+ | C61H100O6  |
| TG(18:2_20:3_22:5)         | 9.73E+02 | 9.55E+02 | [M+NH4]+ | C63H102O6  |
| TG(18:2_20:4_20:4)         | 9.45E+02 | 9.27E+02 | [M+NH4]+ | C61H98O6   |
| TG(18:2_20:4_20:5)         | 9.43E+02 | 9.25E+02 | [M+NH4]+ | C61H96O6   |
| TG(18:2_20:5_20:5)         | 9.41E+02 | 9.23E+02 | [M+NH4]+ | C61H94O6   |
| TG(18:2_20:5_22:6)         | 9.67E+02 | 9.49E+02 | [M+NH4]+ | C63H96O6   |
| TG(18:2_22:5_22:6)         | 9.95E+02 | 9.77E+02 | [M+NH4]+ | C65H100O6  |
| TG(18:3_20:4_20:4)         | 9.43E+02 | 9.25E+02 | [M+NH4]+ | C61H96O6   |
| TG(19:0_18:1_22:6)         | 9.65E+02 | 9.47E+02 | [M+NH4]+ | C62H106O6  |
| TG(19:0_18:2_18:2)         | 9.15E+02 | 8.97E+02 | [M+NH4]+ | C58H104O6  |
| TG(19:1_18:2_18:2)         | 9.13E+02 | 8.95E+02 | [M+NH4]+ | C58H102O6  |
| TG(20:0_18:1_22:6)         | 9.79E+02 | 9.61E+02 | [M+NH4]+ | C63H108O6  |
| TG(20:0_18:2_18:2)         | 9.29E+02 | 9.11E+02 | [M+NH4]+ | C59H106O6  |
| TG(20:0_18:3_18:3)         | 9.25E+02 | 9.07E+02 | [M+NH4]+ | C59H102O6  |
| TG(20:0_20:4_22:6)         | 1.00E+03 | 9.83E+02 | [M+NH4]+ | C65H106O6  |
| TG(20:1_18:2_18:0)         | 9.31E+02 | 9.13E+02 | [M+NH4]+ | C59H108O6  |
| TG(20:1_18:2_18:3)         | 9.25E+02 | 9.07E+02 | [M+NH4]+ | C59H102O6  |
| TG(20:1_18:2_22:6)         | 9.75E+02 | 9.57E+02 | [M+NH4]+ | C63H104O6  |
| TG(20:1_18:3_18:3)         | 9.23E+02 | 9.05E+02 | [M+NH4]+ | C59H100O6  |
| TG(22:0_18:1_18:1)         | 9.61E+02 | 9.43E+02 | [M+NH4]+ | C61H114O6  |
| TG(22:1_18:2_22:6)         | 1.00E+03 | 9.85E+02 | [M+NH4]+ | C65H108O6  |
| TG(23:0_18:1_18:1)         | 9.75E+02 | 9.57E+02 | [M+NH4]+ | C62H116O6  |
| TG(24:1_18:2_18:2)         | 9.83E+02 | 9.65E+02 | [M+NH4]+ | C63H112O6  |
| TG(8:0_10:0_10:0)          | 5.44E+02 | 5.26E+02 | [M+NH4]+ | C31H58O6   |
| TG(8:0_14:0_16:0)          | 6.85E+02 | 6.67E+02 | [M+NH4]+ | C41H78O6   |
| TG(8:0_14:0_18:0)          | 7.13E+02 | 6.95E+02 | [M+NH4]+ | C43H82O6   |
| TG(8:0_15:1_18:2)          | 7.21E+02 | 7.03E+02 | [M+NH4]+ | C44H78O6   |
| TG(8:0_16:0_16:0)          | 7.13E+02 | 6.95E+02 | [M+NH4]+ | C43H82O6   |
| TG(8:0_16:0_16:1)          | 7.11E+02 | 6.93E+02 | [M+NH4]+ | C43H80O6   |
| TG(8:0_16:0_18:1)          | 7.39E+02 | 7.21E+02 | [M+NH4]+ | C45H84O6   |
| TG(8:0_16:0_18:2)          | 7.37E+02 | 7.19E+02 | [M+NH4]+ | C45H82O6   |
| TG(8:0_16:1_18:1)          | 7.37E+02 | 7.19E+02 | [M+NH4]+ | C45H82O6   |
| TG(8:0_18:1_18:2)          | 7.63E+02 | 7.45E+02 | [M+NH4]+ | C47H84O6   |
| TG(9:0_16:0_18:2)          | 7.51E+02 | 7.33E+02 | [M+NH4]+ | C46H84O6   |
| TG(9:0_18:1_18:2)          | 7.77E+02 | 7.59E+02 | [M+NH4]+ | C48H86O6   |
| TG(O-20:0_16:0_18:1)       | 8.93E+02 | 8.75E+02 | [M+NH4]+ | C57H110O5  |
| TXB2                       | 3.69E+02 | 3.70E+02 | [M-H]-   | C20H34O6   |
| Taurochenodeoxycholic acid | 4.99E+02 | 4.99E+02 | [M-H]-   | C26H45NO6S |
| Taurocholic acid           | 5.15E+02 | 5.15E+02 | [M-H]-   | C26H45NO7S |

|                                  |          |          |        |             |
|----------------------------------|----------|----------|--------|-------------|
| TxB3                             | 3.67E+02 | 3.68E+02 | [M-H]- | C20H32O6    |
| Ursocholic acid                  | 4.07E+02 | 4.08E+02 | [M-H]- | C24H40O5    |
| lithocholic acid-3-sulfate       | 4.56E+02 | 4.56E+02 | [M-H]- | C24H38O3    |
| tauro lithocholic acid-3-sulfate | 2.81E+02 | 5.63E+02 | [M-H]- | C26H45NO8S2 |

## hippocampus

| MRL/lpr  |          |          |          |          |          |          |          |          | MRL |
|----------|----------|----------|----------|----------|----------|----------|----------|----------|-----|
| S1       | S2       | S3       | S4       | S5       | S6       | C1       | C2       | C3       |     |
| 1.09E+03 | 1.62E+03 | 2.51E+03 | 7.59E+02 | 7.68E+02 | 1.26E+03 | 1.02E+03 | 1.53E+03 | 5.15E+02 |     |
| 6.85E+04 | 5.50E+04 | 7.55E+04 | 7.07E+04 | 5.31E+04 | 7.00E+04 | 3.95E+04 | 8.71E+04 | 6.86E+04 |     |
| 1.26E+04 | 1.62E+04 | 1.84E+04 | 1.38E+04 | 1.70E+04 | 1.67E+04 | 1.35E+04 | 1.18E+04 | 1.49E+04 |     |
| 2.28E+03 | 2.35E+03 | 1.84E+03 | 1.93E+03 | 1.72E+03 | 2.07E+03 | 2.08E+03 | 1.61E+03 | 2.24E+03 |     |
| 4.12E+04 | 5.41E+04 | 5.75E+04 | 3.89E+04 | 5.39E+04 | 5.73E+04 | 4.55E+04 | 4.57E+04 | 5.28E+04 |     |
| 3.51E+03 | 4.09E+03 | 5.04E+03 | 2.75E+03 | 3.76E+03 | 5.26E+03 | 4.15E+03 | 2.88E+03 | 3.88E+03 |     |
| 9.00E+00 |     |
| 2.30E+03 | 1.90E+03 | 2.47E+03 | 1.85E+03 | 1.88E+03 | 3.20E+03 | 1.50E+03 | 1.74E+03 | 2.04E+03 |     |
| 9.00E+00 |     |
| 1.40E+05 | 1.37E+05 | 1.53E+05 | 1.31E+05 | 1.28E+05 | 1.41E+05 | 1.37E+05 | 9.00E+00 | 9.00E+00 |     |
| 9.00E+00 | 9.00E+00 | 8.85E+02 | 1.18E+03 | 9.00E+00 | 9.00E+00 | 9.00E+00 | 9.00E+00 | 9.00E+00 |     |
| 3.45E+03 | 4.84E+03 | 5.58E+03 | 2.48E+03 | 2.71E+03 | 4.97E+03 | 3.31E+03 | 2.91E+03 | 3.32E+03 |     |
| 3.53E+03 | 3.36E+03 | 6.95E+03 | 5.58E+03 | 9.11E+03 | 4.85E+03 | 7.46E+03 | 7.17E+03 | 7.68E+03 |     |
| 8.39E+03 | 1.10E+04 | 2.21E+04 | 1.63E+04 | 1.19E+04 | 1.89E+04 | 2.41E+04 | 2.59E+04 | 2.99E+04 |     |
| 9.00E+00 | 4.82E+03 | 9.00E+00 | 9.00E+00 | 5.29E+03 | 9.00E+00 | 1.31E+03 | 3.47E+03 | 9.00E+00 |     |
| 4.47E+04 | 4.00E+04 | 4.37E+04 | 4.34E+04 | 3.28E+04 | 4.26E+04 | 6.99E+04 | 6.66E+04 | 5.53E+04 |     |
| 9.00E+00 | 5.46E+03 | 9.00E+00 | 9.00E+00 | 9.00E+00 | 6.20E+03 | 2.74E+03 | 7.51E+03 | 3.93E+03 |     |
| 7.44E+02 | 9.00E+00 |     |
| 9.00E+00 |     |
| 1.54E+04 | 1.91E+04 | 2.47E+04 | 1.53E+04 | 2.25E+04 | 2.39E+04 | 2.11E+04 | 1.73E+04 | 1.72E+04 |     |
| 9.00E+00 | 9.00E+00 | 9.00E+00 | 9.00E+00 | 2.40E+03 | 2.75E+03 | 6.53E+02 | 1.67E+03 | 1.15E+03 |     |
| 1.50E+04 | 2.31E+04 | 2.05E+04 | 2.42E+04 | 2.33E+04 | 1.35E+04 | 3.93E+04 | 2.45E+04 | 3.35E+04 |     |
| 7.61E+04 | 1.04E+05 | 9.47E+04 | 8.29E+04 | 7.72E+04 | 8.20E+04 | 1.21E+05 | 1.12E+05 | 1.13E+05 |     |
| 2.18E+03 | 4.39E+03 | 4.74E+03 | 3.64E+03 | 4.06E+03 | 5.66E+03 | 3.65E+03 | 5.18E+03 | 4.79E+03 |     |
| 7.54E+04 | 7.83E+04 | 6.69E+04 | 8.00E+04 | 5.68E+04 | 6.17E+04 | 7.43E+04 | 6.90E+04 | 6.33E+04 |     |
| 1.81E+06 | 1.63E+06 | 2.13E+06 | 1.84E+06 | 1.33E+06 | 1.58E+06 | 1.76E+06 | 1.73E+06 | 1.66E+06 |     |
| 9.87E+03 | 1.91E+04 | 1.15E+04 | 1.43E+04 | 1.46E+04 | 8.52E+03 | 1.42E+03 | 2.81E+03 | 4.84E+03 |     |
| 3.41E+03 | 1.21E+04 | 3.58E+03 | 4.98E+03 | 9.71E+03 | 6.04E+03 | 9.00E+00 | 1.04E+04 | 9.00E+00 |     |
| 9.00E+00 | 9.00E+00 | 9.00E+00 | 9.00E+00 | 1.53E+03 | 9.00E+00 | 9.00E+00 | 9.00E+00 | 9.00E+00 |     |
| 5.17E+03 | 7.93E+03 | 7.08E+03 | 6.66E+03 | 4.90E+03 | 6.52E+03 | 3.77E+03 | 5.23E+03 | 2.04E+03 |     |
| 1.56E+04 | 3.79E+04 | 2.12E+04 | 8.34E+03 | 2.67E+04 | 1.77E+04 | 6.40E+03 | 1.23E+04 | 2.01E+03 |     |
| 2.51E+04 | 4.14E+04 | 3.65E+04 | 7.85E+04 | 5.05E+04 | 4.09E+04 | 2.45E+04 | 1.39E+04 | 1.39E+04 |     |
| 9.00E+00 |     |
| 1.38E+03 | 9.47E+03 | 4.45E+03 | 4.40E+03 | 1.52E+03 | 2.31E+03 | 9.00E+00 | 9.00E+00 | 9.00E+00 |     |
| 5.25E+03 | 1.20E+04 | 3.59E+03 | 2.68E+03 | 2.58E+03 | 4.25E+03 | 9.00E+00 | 9.00E+00 | 9.00E+00 |     |
| 4.10E+03 | 2.10E+04 | 1.12E+04 | 1.14E+04 | 6.45E+03 | 1.18E+04 | 5.62E+03 | 1.13E+04 | 4.92E+03 |     |
| 8.47E+04 | 8.77E+04 | 6.63E+04 | 1.07E+05 | 8.67E+04 | 1.03E+05 | 4.02E+04 | 9.04E+04 | 7.96E+04 |     |
| 7.84E+03 | 1.58E+04 | 9.68E+03 | 2.55E+04 | 1.20E+04 | 8.79E+03 | 8.39E+03 | 5.42E+03 | 1.57E+04 |     |
| 9.26E+03 | 1.77E+04 | 1.13E+04 | 1.16E+04 | 5.46E+03 | 5.36E+03 | 3.46E+03 | 6.05E+03 | 7.88E+03 |     |
| 6.01E+04 | 1.18E+05 | 1.08E+05 | 1.54E+05 | 1.31E+05 | 7.85E+04 | 4.37E+04 | 2.42E+04 | 4.64E+04 |     |
| 9.00E+00 |     |
| 2.04E+04 | 4.81E+04 | 7.79E+04 | 2.35E+04 | 2.12E+04 | 5.63E+04 | 1.31E+04 | 9.14E+03 | 3.61E+04 |     |
| 9.00E+00 | 1.04E+04 | 6.01E+03 | 9.00E+00 | 8.87E+03 | 9.00E+00 | 9.00E+00 | 9.00E+00 | 9.58E+03 |     |
| 9.00E+00 | 1.97E+05 | 2.99E+05 | 3.47E+04 | 9.00E+00 | 2.23E+05 | 9.00E+00 | 9.00E+00 | 6.69E+04 |     |
| 3.73E+04 | 3.85E+04 | 5.27E+04 | 6.60E+04 | 5.37E+04 | 5.22E+04 | 6.39E+04 | 8.36E+04 | 4.99E+04 |     |
| 1.73E+04 | 2.33E+04 | 3.98E+04 | 4.72E+04 | 3.18E+04 | 4.41E+04 | 5.19E+03 | 9.00E+00 | 1.24E+04 |     |
| 3.90E+05 | 3.54E+05 | 4.22E+05 | 3.80E+05 | 3.72E+05 | 3.81E+05 | 3.68E+05 | 3.53E+05 | 3.76E+05 |     |
| 4.04E+04 | 2.73E+04 | 4.99E+04 | 6.44E+04 | 6.43E+04 | 5.92E+04 | 2.90E+04 | 2.43E+04 | 1.97E+04 |     |
| 2.71E+04 | 2.91E+04 | 3.27E+04 | 3.74E+04 | 3.46E+04 | 3.23E+04 | 3.56E+04 | 4.92E+04 | 4.31E+04 |     |
| 1.37E+06 | 1.11E+06 | 1.70E+06 | 1.77E+06 | 1.74E+06 | 1.22E+06 | 1.98E+06 | 2.22E+06 | 1.56E+06 |     |

|          |          |          |          |          |          |          |          |          |
|----------|----------|----------|----------|----------|----------|----------|----------|----------|
| 5.78E+04 | 4.74E+04 | 6.76E+04 | 8.47E+04 | 6.25E+04 | 6.26E+04 | 1.17E+05 | 1.27E+05 | 8.23E+04 |
| 1.86E+04 | 1.82E+04 | 2.18E+04 | 2.65E+04 | 2.51E+04 | 2.18E+04 | 2.35E+04 | 2.41E+04 | 2.23E+04 |
| 3.92E+04 | 3.11E+04 | 6.30E+04 | 5.84E+04 | 6.60E+04 | 4.23E+04 | 6.37E+04 | 6.20E+04 | 4.71E+04 |
| 9.00E+00 | 9.00E+00 | 1.51E+04 | 9.00E+00 | 9.00E+00 | 9.00E+00 | 1.38E+04 | 1.56E+04 | 1.26E+04 |
| 1.76E+05 | 1.77E+05 | 2.02E+05 | 2.18E+05 | 1.88E+05 | 1.89E+05 | 2.60E+05 | 2.72E+05 | 2.53E+05 |
| 5.65E+06 | 5.20E+06 | 6.63E+06 | 6.76E+06 | 7.48E+06 | 5.53E+06 | 6.01E+06 | 6.39E+06 | 5.50E+06 |
| 4.49E+05 | 3.60E+05 | 5.64E+05 | 6.37E+05 | 5.41E+05 | 4.26E+05 | 6.95E+05 | 7.61E+05 | 5.01E+05 |
| 8.05E+04 | 6.87E+04 | 8.08E+04 | 9.68E+04 | 8.64E+04 | 6.72E+04 | 1.04E+05 | 1.28E+05 | 1.04E+05 |
| 1.29E+04 | 9.87E+03 | 1.87E+04 | 2.75E+04 | 1.55E+04 | 1.60E+04 | 1.82E+04 | 1.97E+04 | 2.00E+04 |
| 5.14E+04 | 5.35E+04 | 9.01E+04 | 7.10E+04 | 7.63E+04 | 6.00E+04 | 7.91E+04 | 9.22E+04 | 7.37E+04 |
| 4.24E+04 | 3.55E+04 | 5.20E+04 | 5.43E+04 | 5.92E+04 | 4.37E+04 | 5.61E+04 | 6.57E+04 | 4.52E+04 |
| 5.64E+04 | 1.04E+05 | 1.07E+05 | 8.55E+04 | 8.85E+04 | 9.01E+04 | 1.00E+05 | 1.21E+05 | 1.15E+05 |
| 2.12E+06 | 3.38E+06 | 3.72E+06 | 3.11E+06 | 3.67E+06 | 3.40E+06 | 2.63E+06 | 3.27E+06 | 2.89E+06 |
| 2.98E+06 | 2.72E+06 | 4.01E+06 | 4.13E+06 | 4.20E+06 | 3.35E+06 | 3.86E+06 | 4.20E+06 | 3.06E+06 |
| 1.79E+05 | 2.11E+05 | 2.59E+05 | 2.77E+05 | 2.35E+05 | 2.28E+05 | 3.01E+05 | 3.41E+05 | 3.16E+05 |
| 2.52E+05 | 1.86E+05 | 2.81E+05 | 4.07E+05 | 4.89E+05 | 3.35E+05 | 2.11E+05 | 1.89E+05 | 1.75E+05 |
| 3.62E+04 | 3.21E+04 | 4.91E+04 | 6.54E+04 | 6.28E+04 | 4.81E+04 | 4.51E+04 | 4.01E+04 | 4.09E+04 |
| 2.66E+04 | 1.77E+04 | 2.20E+04 | 3.53E+04 | 2.06E+04 | 2.33E+04 | 3.00E+04 | 1.56E+04 | 3.13E+04 |
| 9.00E+00 |
| 4.20E+04 | 8.75E+04 | 1.11E+05 | 8.66E+04 | 6.82E+04 | 1.00E+05 | 8.11E+04 | 1.38E+05 | 9.28E+04 |
| 5.47E+04 | 7.98E+04 | 1.02E+05 | 7.82E+04 | 1.47E+05 | 1.21E+05 | 6.49E+04 | 4.50E+04 | 6.42E+04 |
| 3.84E+04 | 7.20E+04 | 8.30E+04 | 6.17E+04 | 6.65E+04 | 6.91E+04 | 3.68E+04 | 4.20E+04 | 4.12E+04 |
| 1.47E+06 | 1.66E+06 | 2.16E+06 | 3.08E+06 | 2.02E+06 | 2.01E+06 | 1.23E+06 | 1.37E+06 | 1.25E+06 |
| 3.68E+04 | 4.93E+04 | 5.99E+04 | 7.98E+04 | 3.76E+04 | 5.29E+04 | 6.34E+04 | 6.14E+04 | 6.07E+04 |
| 9.00E+00 |
| 9.00E+00 |
| 9.00E+00 | 1.37E+04 | 1.46E+04 |
| 7.94E+04 | 9.19E+04 | 1.03E+05 | 6.83E+04 | 6.76E+04 | 1.00E+05 | 8.66E+04 | 1.16E+05 | 9.57E+04 |
| 5.63E+03 | 7.93E+03 | 1.34E+04 | 6.15E+03 | 1.17E+04 | 1.10E+04 | 5.94E+03 | 4.17E+03 | 1.02E+04 |
| 3.50E+03 | 1.01E+04 | 1.51E+04 | 5.16E+03 | 7.16E+03 | 1.08E+04 | 5.53E+03 | 8.46E+03 | 9.47E+03 |
| 4.23E+04 | 1.07E+05 | 1.35E+05 | 8.91E+04 | 6.99E+04 | 1.10E+05 | 4.86E+04 | 6.12E+04 | 7.17E+04 |
| 1.64E+04 | 2.51E+04 | 3.12E+04 | 2.31E+04 | 2.66E+04 | 2.38E+04 | 1.46E+04 | 1.39E+04 | 1.31E+04 |
| 1.02E+05 | 8.79E+04 | 1.42E+05 | 2.11E+05 | 1.10E+05 | 1.13E+05 | 8.62E+04 | 1.03E+05 | 8.58E+04 |
| 1.53E+06 | 1.68E+06 | 2.06E+06 | 1.77E+06 | 2.25E+06 | 1.62E+06 | 6.61E+05 | 7.63E+05 | 9.56E+05 |
| 1.48E+05 | 1.86E+05 | 1.99E+05 | 1.46E+05 | 1.12E+05 | 1.70E+05 | 1.14E+05 | 1.10E+05 | 1.27E+05 |
| 5.23E+04 | 8.66E+04 | 1.05E+05 | 5.20E+04 | 8.10E+04 | 7.85E+04 | 3.61E+04 | 3.55E+04 | 5.22E+04 |
| 6.52E+04 | 9.07E+04 | 1.24E+05 | 6.09E+04 | 9.90E+04 | 9.79E+04 | 4.51E+04 | 4.42E+04 | 6.94E+04 |
| 6.63E+04 | 8.43E+05 | 9.98E+05 | 2.02E+05 | 6.30E+04 | 8.71E+05 | 5.98E+04 | 5.08E+04 | 3.32E+05 |
| 1.01E+05 | 1.07E+05 | 1.34E+05 | 1.33E+05 | 1.22E+05 | 1.08E+05 | 5.27E+04 | 5.83E+04 | 4.69E+04 |
| 1.01E+05 | 1.06E+05 | 1.28E+05 | 1.28E+05 | 1.17E+05 | 9.63E+04 | 6.28E+04 | 5.99E+04 | 6.59E+04 |
| 2.48E+06 | 1.77E+06 | 1.94E+06 | 2.13E+06 | 1.98E+06 | 1.89E+06 | 2.16E+06 | 1.90E+06 | 1.80E+06 |
| 8.49E+03 | 1.12E+05 | 2.42E+05 | 5.86E+04 | 2.68E+04 | 1.90E+05 | 8.23E+03 | 9.00E+00 | 4.84E+04 |
| 9.28E+06 | 8.02E+06 | 8.36E+06 | 8.72E+06 | 8.56E+06 | 8.37E+06 | 8.12E+06 | 8.14E+06 | 8.17E+06 |
| 6.09E+05 | 4.84E+05 | 5.46E+05 | 5.43E+05 | 5.68E+05 | 4.87E+05 | 5.76E+05 | 4.83E+05 | 4.81E+05 |
| 1.99E+04 | 3.26E+04 | 4.01E+04 | 2.14E+04 | 3.37E+04 | 3.51E+04 | 9.00E+00 | 9.00E+00 | 1.73E+04 |
| 1.40E+04 | 5.12E+04 | 5.82E+04 | 2.05E+04 | 1.39E+04 | 5.03E+04 | 1.55E+04 | 9.13E+03 | 3.12E+04 |
| 9.00E+00 | 3.38E+04 | 3.16E+04 | 1.52E+04 | 5.30E+03 | 2.80E+04 | 9.00E+00 | 5.03E+03 | 2.19E+04 |
| 1.36E+04 | 1.06E+05 | 1.18E+05 | 2.98E+04 | 2.02E+04 | 1.06E+05 | 1.46E+04 | 1.34E+04 | 4.51E+04 |
| 1.62E+04 | 9.17E+04 | 6.10E+04 | 4.57E+04 | 2.31E+04 | 7.16E+04 | 9.00E+00 | 9.00E+00 | 2.47E+04 |
| 5.66E+04 | 4.92E+04 | 4.41E+04 | 5.66E+04 | 5.39E+04 | 7.32E+04 | 5.46E+04 | 6.99E+04 | 6.91E+04 |
| 9.16E+03 | 1.51E+04 | 7.93E+03 | 8.93E+03 | 7.94E+03 | 7.22E+03 | 9.00E+00 | 6.46E+03 | 9.00E+00 |
| 7.06E+04 | 9.12E+04 | 7.10E+04 | 7.07E+04 | 5.50E+04 | 1.02E+05 | 4.31E+04 | 6.93E+04 | 5.30E+04 |
| 1.23E+04 | 1.26E+04 | 8.38E+03 | 1.14E+04 | 1.23E+04 | 1.08E+04 | 1.38E+04 | 5.89E+03 | 3.40E+03 |
| 1.06E+05 | 1.34E+05 | 1.02E+05 | 1.51E+05 | 9.78E+04 | 1.08E+05 | 7.95E+04 | 1.09E+05 | 8.41E+04 |

|          |          |          |          |          |          |          |          |          |
|----------|----------|----------|----------|----------|----------|----------|----------|----------|
| 1.12E+05 | 1.13E+05 | 1.20E+05 | 1.18E+05 | 2.44E+04 | 1.29E+05 | 8.80E+04 | 1.22E+05 | 1.00E+05 |
| 7.68E+03 | 1.21E+04 | 7.81E+03 | 4.67E+03 | 1.01E+04 | 1.92E+04 | 5.47E+03 | 2.44E+04 | 6.97E+03 |
| 1.89E+03 | 9.00E+00 | 9.00E+00 | 9.00E+00 | 9.00E+00 | 9.00E+00 | 5.84E+03 | 4.45E+03 | 3.94E+03 |
| 8.68E+03 | 3.66E+03 | 6.10E+03 | 4.90E+03 | 3.22E+03 | 5.68E+03 | 9.00E+00 | 9.00E+00 | 9.00E+00 |
| 1.65E+04 | 1.22E+04 | 1.84E+04 | 1.16E+04 | 1.37E+04 | 1.31E+04 | 9.00E+00 | 2.38E+04 | 1.69E+04 |
| 9.00E+00 | 5.41E+02 | 9.00E+00 | 9.00E+00 | 9.00E+00 | 9.00E+00 | 9.00E+00 | 9.00E+00 | 7.16E+02 |
| 9.63E+03 | 8.03E+03 | 4.57E+03 | 8.91E+03 | 1.36E+04 | 9.04E+03 | 2.68E+03 | 4.96E+03 | 8.66E+03 |
| 6.67E+03 | 4.94E+03 | 1.05E+04 | 1.55E+04 | 1.08E+04 | 1.13E+04 | 7.44E+03 | 6.18E+03 | 5.81E+03 |
| 1.64E+04 | 1.71E+04 | 2.02E+04 | 2.40E+04 | 1.98E+04 | 1.74E+04 | 1.38E+04 | 2.94E+04 | 1.10E+04 |
| 4.81E+03 | 3.49E+03 | 6.18E+03 | 8.81E+03 | 9.23E+03 | 6.70E+03 | 3.96E+03 | 9.00E+00 | 5.23E+03 |
| 1.65E+05 | 1.78E+05 | 1.62E+05 | 1.54E+05 | 1.94E+05 | 1.48E+05 | 1.14E+05 | 1.16E+05 | 8.54E+04 |
| 1.38E+06 | 1.33E+06 | 1.37E+06 | 1.59E+06 | 1.30E+06 | 1.42E+06 | 8.97E+05 | 1.11E+06 | 9.83E+05 |
| 3.02E+04 | 3.90E+04 | 3.88E+04 | 2.66E+04 | 2.65E+04 | 2.41E+04 | 2.37E+04 | 3.94E+04 | 2.17E+04 |
| 4.46E+03 | 3.26E+03 | 9.00E+00 |
| 3.62E+04 | 2.58E+04 | 3.70E+04 | 3.86E+04 | 3.24E+04 | 3.53E+04 | 6.30E+04 | 6.56E+04 | 4.55E+04 |
| 9.06E+04 | 1.99E+05 | 2.50E+05 | 9.42E+04 | 8.80E+04 | 2.37E+05 | 9.52E+04 | 1.95E+05 | 1.06E+05 |
| 1.34E+03 | 3.17E+03 | 9.00E+00 | 2.41E+03 | 1.05E+03 | 9.00E+00 | 9.00E+00 | 9.00E+00 | 9.00E+00 |
| 4.51E+04 | 6.58E+04 | 6.88E+04 | 7.53E+04 | 5.12E+04 | 4.91E+04 | 5.05E+04 | 4.58E+04 | 5.28E+04 |
| 4.53E+04 | 1.12E+05 | 7.39E+04 | 6.78E+04 | 8.76E+04 | 7.11E+04 | 7.71E+04 | 8.56E+04 | 5.50E+04 |
| 9.00E+00 | 5.18E+02 | 9.00E+00 |
| 8.17E+04 | 7.97E+04 | 8.37E+04 | 6.21E+04 | 7.13E+04 | 6.69E+04 | 4.29E+04 | 5.70E+04 | 4.31E+04 |
| 5.52E+04 | 5.83E+04 | 9.04E+04 | 5.83E+04 | 7.84E+04 | 4.22E+04 | 9.50E+04 | 7.96E+04 | 7.03E+04 |
| 6.67E+05 | 5.30E+05 | 6.32E+05 | 6.45E+05 | 6.36E+05 | 6.11E+05 | 4.78E+05 | 6.91E+05 | 5.24E+05 |
| 8.64E+06 | 7.27E+06 | 6.57E+06 | 9.08E+06 | 7.18E+06 | 7.60E+06 | 6.02E+06 | 7.61E+06 | 6.28E+06 |
| 2.22E+06 | 2.12E+06 | 1.69E+06 | 2.16E+06 | 2.11E+06 | 2.15E+06 | 1.82E+06 | 1.87E+06 | 1.72E+06 |
| 3.11E+04 | 2.71E+04 | 3.29E+04 | 3.70E+04 | 2.90E+04 | 3.70E+04 | 2.90E+04 | 3.63E+04 | 2.96E+04 |
| 9.00E+00 | 9.00E+00 | 9.00E+00 | 9.74E+03 | 9.00E+00 | 1.53E+04 | 9.00E+00 | 9.00E+00 | 9.00E+00 |
| 1.13E+05 | 8.67E+04 | 1.47E+05 | 1.22E+05 | 1.02E+05 | 8.47E+04 | 1.52E+05 | 2.60E+05 | 1.05E+05 |
| 1.13E+04 | 1.26E+04 | 3.16E+04 | 1.25E+04 | 1.37E+04 | 1.85E+04 | 1.43E+04 | 3.31E+04 | 1.93E+04 |
| 9.00E+00 |
| 3.10E+03 | 6.71E+03 | 2.20E+04 | 1.01E+04 | 1.23E+04 | 6.61E+03 | 9.25E+03 | 1.15E+04 | 2.34E+04 |
| 5.92E+03 | 9.00E+00 | 9.00E+00 | 1.27E+04 | 1.22E+04 | 1.61E+04 | 1.03E+04 | 6.90E+04 | 2.12E+04 |
| 1.33E+05 | 1.12E+05 | 1.60E+05 | 1.41E+05 | 1.55E+05 | 1.22E+05 | 1.21E+05 | 1.39E+05 | 8.90E+04 |
| 9.96E+04 | 1.02E+05 | 7.79E+04 | 4.85E+04 | 8.89E+04 | 1.03E+05 | 6.57E+04 | 7.76E+04 | 9.02E+04 |
| 4.77E+04 | 5.50E+04 | 5.51E+04 | 5.14E+04 | 5.79E+04 | 5.55E+04 | 3.11E+04 | 5.50E+04 | 5.30E+04 |
| 1.62E+04 | 2.34E+04 | 5.67E+04 | 1.81E+04 | 1.99E+04 | 2.13E+04 | 2.10E+04 | 4.41E+04 | 2.53E+04 |
| 3.58E+04 | 6.00E+04 | 3.78E+04 | 4.10E+04 | 4.75E+04 | 3.40E+04 | 2.00E+04 | 3.18E+04 | 3.42E+04 |
| 2.12E+06 | 1.84E+06 | 1.43E+06 | 2.07E+06 | 2.47E+06 | 1.80E+06 | 1.70E+06 | 1.90E+06 | 1.38E+06 |
| 1.17E+04 | 9.55E+03 | 2.95E+04 | 1.50E+04 | 1.90E+04 | 1.62E+04 | 1.71E+04 | 2.51E+04 | 1.85E+04 |
| 1.70E+05 | 1.93E+05 | 1.58E+05 | 2.00E+05 | 1.01E+05 | 1.75E+05 | 1.46E+05 | 9.23E+04 | 8.31E+04 |
| 3.97E+05 | 4.28E+05 | 5.01E+05 | 4.25E+05 | 4.09E+05 | 4.51E+05 | 4.07E+05 | 4.10E+05 | 4.25E+05 |
| 1.99E+05 | 1.67E+05 | 1.79E+05 | 1.80E+05 | 2.04E+05 | 1.88E+05 | 1.10E+05 | 1.22E+05 | 1.09E+05 |
| 1.55E+08 | 1.60E+08 | 1.49E+08 | 1.60E+08 | 1.59E+08 | 1.42E+08 | 1.25E+08 | 1.50E+08 | 1.40E+08 |
| 1.58E+06 | 1.13E+06 | 1.44E+06 | 1.02E+06 | 1.27E+06 | 1.23E+06 | 1.36E+06 | 1.60E+06 | 1.11E+06 |
| 4.79E+05 | 3.85E+05 | 5.73E+05 | 5.16E+05 | 4.16E+05 | 4.49E+05 | 3.63E+05 | 6.28E+05 | 4.89E+05 |
| 1.39E+06 | 2.81E+06 | 1.84E+06 | 3.04E+06 | 3.01E+06 | 2.96E+06 | 2.83E+06 | 3.16E+06 | 2.86E+06 |
| 5.61E+06 | 4.04E+06 | 4.93E+06 | 4.88E+06 | 4.66E+06 | 4.88E+06 | 2.98E+06 | 3.40E+06 | 2.74E+06 |
| 9.94E+04 | 7.38E+04 | 1.11E+05 | 1.09E+05 | 1.02E+05 | 1.04E+05 | 6.19E+04 | 1.48E+05 | 6.00E+04 |
| 2.65E+05 | 2.72E+05 | 2.78E+05 | 2.77E+05 | 2.09E+05 | 2.21E+05 | 3.32E+05 | 4.70E+05 | 3.84E+05 |
| 4.49E+04 | 4.71E+04 | 7.80E+04 | 1.42E+04 | 5.49E+04 | 3.16E+04 | 6.86E+04 | 9.24E+04 | 6.06E+04 |
| 1.30E+06 | 1.56E+06 | 1.65E+06 | 1.37E+06 | 1.16E+06 | 1.15E+06 | 1.01E+06 | 1.69E+06 | 1.15E+06 |
| 1.34E+07 | 1.11E+07 | 1.13E+07 | 1.14E+07 | 1.19E+07 | 1.19E+07 | 1.11E+07 | 1.25E+07 | 1.08E+07 |
| 1.67E+05 | 1.35E+05 | 1.91E+05 | 1.62E+05 | 1.76E+05 | 1.36E+05 | 1.40E+05 | 1.98E+05 | 1.36E+05 |
| 5.32E+05 | 5.42E+05 | 3.85E+05 | 4.67E+05 | 4.73E+05 | 4.96E+05 | 4.29E+05 | 3.91E+05 | 4.74E+05 |

|          |          |          |          |          |          |          |          |          |
|----------|----------|----------|----------|----------|----------|----------|----------|----------|
| 5.07E+05 | 3.54E+05 | 4.54E+05 | 4.16E+05 | 4.44E+05 | 4.57E+05 | 6.26E+05 | 8.56E+05 | 6.54E+05 |
| 2.52E+06 | 1.90E+06 | 2.26E+06 | 2.16E+06 | 2.48E+06 | 2.21E+06 | 2.05E+06 | 2.36E+06 | 1.99E+06 |
| 4.88E+04 | 5.09E+04 | 3.67E+04 | 2.92E+04 | 3.99E+04 | 3.65E+04 | 2.46E+04 | 3.92E+04 | 2.48E+04 |
| 6.05E+05 | 6.29E+05 | 7.57E+05 | 7.48E+05 | 6.80E+05 | 7.28E+05 | 7.04E+05 | 1.06E+06 | 7.90E+05 |
| 1.88E+07 | 1.49E+07 | 1.62E+07 | 1.88E+07 | 1.71E+07 | 1.66E+07 | 1.68E+07 | 1.93E+07 | 1.39E+07 |
| 1.39E+06 | 1.95E+06 | 2.10E+06 | 1.57E+06 | 1.93E+06 | 1.41E+06 | 1.24E+06 | 1.87E+06 | 1.34E+06 |
| 2.84E+04 | 1.48E+04 | 2.84E+04 | 2.81E+04 | 1.67E+04 | 2.23E+04 | 2.45E+04 | 4.52E+04 | 1.98E+04 |
| 2.84E+04 | 2.78E+04 | 3.81E+04 | 1.46E+04 | 1.89E+04 | 2.69E+04 | 3.61E+04 | 5.47E+04 | 3.28E+04 |
| 6.19E+05 | 5.07E+05 | 6.58E+05 | 6.72E+05 | 5.94E+05 | 5.16E+05 | 5.79E+05 | 8.16E+05 | 6.45E+05 |
| 7.10E+03 | 1.69E+04 | 1.35E+04 | 1.26E+04 | 5.49E+03 | 4.93E+03 | 1.87E+04 | 1.53E+04 | 1.46E+04 |
| 1.96E+04 | 2.00E+04 | 1.07E+04 | 1.73E+04 | 2.44E+04 | 1.73E+04 | 2.02E+04 | 3.11E+04 | 2.21E+04 |
| 1.20E+04 | 1.26E+04 | 2.19E+04 | 8.75E+03 | 1.35E+04 | 1.25E+04 | 1.43E+04 | 1.63E+04 | 1.67E+04 |
| 2.34E+03 | 6.32E+03 | 9.26E+03 | 4.03E+03 | 3.58E+03 | 7.78E+03 | 9.00E+00 | 9.00E+00 | 9.00E+00 |
| 1.63E+04 | 2.86E+04 | 1.84E+04 | 1.67E+04 | 1.58E+04 | 2.77E+04 | 1.81E+04 | 1.98E+04 | 3.02E+04 |
| 5.03E+05 | 5.21E+05 | 4.86E+05 | 5.71E+05 | 4.38E+05 | 4.99E+05 | 3.68E+05 | 4.09E+05 | 3.84E+05 |
| 7.78E+04 | 7.15E+04 | 9.17E+04 | 6.28E+04 | 6.64E+04 | 6.72E+04 | 7.04E+04 | 7.62E+04 | 9.13E+04 |
| 5.65E+07 | 4.81E+07 | 3.99E+07 | 5.94E+07 | 4.84E+07 | 4.89E+07 | 4.60E+07 | 4.83E+07 | 4.82E+07 |
| 4.08E+05 | 3.29E+05 | 4.12E+05 | 4.34E+05 | 3.78E+05 | 4.14E+05 | 4.41E+05 | 3.89E+05 | 4.06E+05 |
| 1.72E+06 | 1.79E+06 | 2.23E+06 | 1.71E+06 | 1.66E+06 | 1.92E+06 | 1.98E+06 | 2.42E+06 | 1.96E+06 |
| 1.62E+05 | 1.25E+05 | 1.98E+05 | 1.85E+05 | 1.53E+05 | 1.45E+05 | 2.92E+05 | 3.21E+05 | 2.71E+05 |
| 2.30E+04 | 1.56E+04 | 1.95E+04 | 2.20E+04 | 1.63E+04 | 1.98E+04 | 3.06E+04 | 3.83E+04 | 1.82E+04 |
| 4.10E+05 | 7.86E+05 | 1.21E+06 | 4.72E+05 | 4.72E+05 | 9.33E+05 | 4.12E+05 | 1.01E+06 | 4.67E+05 |
| 4.61E+05 | 3.74E+05 | 6.04E+05 | 4.59E+05 | 4.50E+05 | 4.17E+05 | 5.97E+05 | 9.85E+05 | 5.69E+05 |
| 2.15E+05 | 2.40E+05 | 3.14E+05 | 2.89E+05 | 1.99E+05 | 2.59E+05 | 3.99E+05 | 3.58E+05 | 4.16E+05 |
| 7.71E+04 | 5.54E+04 | 1.29E+05 | 7.19E+04 | 9.24E+04 | 8.00E+04 | 1.45E+05 | 1.83E+05 | 1.35E+05 |
| 1.35E+05 | 3.77E+05 | 4.51E+05 | 2.68E+05 | 3.14E+05 | 3.28E+05 | 3.17E+05 | 5.33E+05 | 2.81E+05 |
| 1.33E+06 | 1.12E+06 | 1.72E+06 | 1.66E+06 | 1.51E+06 | 1.40E+06 | 2.21E+06 | 9.46E+05 | 2.30E+06 |
| 9.95E+04 | 1.41E+05 | 1.28E+05 | 1.15E+05 | 1.54E+05 | 1.01E+05 | 1.13E+05 | 1.24E+05 | 1.09E+05 |
| 1.60E+04 | 2.04E+04 | 1.17E+04 | 1.96E+04 | 2.15E+04 | 1.52E+04 | 2.32E+04 | 2.64E+04 | 3.51E+04 |
| 8.80E+04 | 8.07E+04 | 8.54E+04 | 8.67E+04 | 8.83E+04 | 7.09E+04 | 1.43E+05 | 1.51E+05 | 9.41E+04 |
| 2.30E+04 | 1.28E+04 | 2.76E+04 | 2.15E+04 | 2.44E+04 | 4.40E+03 | 2.30E+04 | 1.97E+04 | 8.75E+03 |
| 1.22E+04 | 9.87E+03 | 1.53E+04 | 1.29E+04 | 8.56E+03 | 5.68E+03 | 7.88E+03 | 1.63E+04 | 9.17E+03 |
| 3.91E+05 | 2.64E+05 | 4.72E+05 | 3.95E+05 | 3.68E+05 | 3.42E+05 | 4.03E+05 | 5.97E+05 | 4.11E+05 |
| 9.00E+00 | 1.05E+04 | 9.00E+00 | 1.36E+04 | 9.00E+00 | 9.00E+00 | 9.00E+00 | 4.39E+03 | 8.30E+03 |
| 9.00E+00 | 2.70E+03 |
| 4.24E+04 | 1.95E+04 | 2.81E+04 | 2.70E+04 | 2.20E+04 | 2.60E+04 | 3.07E+04 | 5.57E+04 | 2.49E+04 |
| 7.11E+04 | 7.44E+04 | 6.71E+04 | 7.18E+04 | 6.38E+04 | 6.66E+04 | 7.71E+04 | 1.03E+05 | 7.75E+04 |
| 2.29E+04 | 1.28E+04 | 2.41E+04 | 4.04E+04 | 2.12E+04 | 2.33E+04 | 3.10E+04 | 2.37E+04 | 2.17E+04 |
| 2.49E+04 | 2.82E+04 | 1.02E+04 | 1.93E+04 | 2.55E+04 | 2.42E+04 | 1.92E+04 | 1.12E+04 | 1.58E+04 |
| 4.40E+04 | 4.31E+04 | 5.15E+04 | 4.53E+04 | 5.91E+04 | 4.57E+04 | 3.59E+04 | 5.98E+04 | 3.68E+04 |
| 6.95E+04 | 5.22E+04 | 9.92E+04 | 9.22E+04 | 8.71E+04 | 4.94E+04 | 1.15E+05 | 1.27E+05 | 1.09E+05 |
| 1.47E+05 | 1.54E+05 | 1.69E+05 | 1.23E+05 | 1.64E+05 | 1.41E+05 | 1.33E+05 | 1.33E+05 | 1.49E+05 |
| 5.49E+03 | 9.63E+03 | 5.67E+03 | 1.18E+04 | 8.71E+03 | 5.58E+03 | 4.15E+03 | 1.52E+04 | 4.67E+03 |
| 1.82E+03 | 6.32E+03 | 6.29E+03 | 4.90E+03 | 9.00E+00 | 2.27E+03 | 4.04E+03 | 2.68E+03 | 7.69E+03 |
| 5.96E+04 | 3.16E+04 | 5.33E+04 | 5.01E+04 | 3.51E+04 | 5.05E+04 | 5.74E+04 | 8.69E+04 | 5.47E+04 |
| 9.00E+00 | 9.00E+00 | 9.00E+00 | 9.00E+00 | 1.46E+03 | 9.00E+00 | 9.00E+00 | 9.00E+00 | 9.00E+00 |
| 5.84E+04 | 4.37E+04 | 7.19E+04 | 6.01E+04 | 4.25E+04 | 4.67E+04 | 1.09E+05 | 1.65E+05 | 8.05E+04 |
| 2.93E+04 | 2.65E+04 | 2.24E+04 | 2.13E+04 | 2.93E+04 | 2.45E+04 | 4.10E+04 | 2.89E+04 | 2.23E+04 |
| 4.64E+04 | 3.15E+04 | 6.05E+04 | 6.19E+04 | 6.66E+04 | 4.05E+04 | 1.07E+05 | 1.81E+05 | 7.79E+04 |
| 1.53E+04 | 1.43E+04 | 1.52E+04 | 2.26E+04 | 1.71E+04 | 2.73E+04 | 1.43E+04 | 1.76E+04 | 1.07E+04 |
| 6.04E+05 | 1.15E+06 | 1.16E+06 | 1.13E+06 | 1.13E+06 | 1.04E+06 | 8.79E+05 | 8.17E+05 | 9.34E+05 |
| 9.00E+00 | 9.00E+00 | 9.00E+00 | 9.00E+00 | 9.00E+00 | 4.15E+03 | 9.00E+00 | 9.00E+00 | 9.00E+00 |
| 9.00E+00 |
| 9.00E+00 | 9.00E+00 | 9.00E+00 | 9.00E+00 | 1.05E+03 | 9.00E+00 | 9.00E+00 | 9.00E+00 | 9.00E+00 |

|          |          |          |          |          |          |          |          |          |          |
|----------|----------|----------|----------|----------|----------|----------|----------|----------|----------|
| 9.00E+00 | 9.00E+00 | 2.52E+03 | 9.00E+00 |
| 9.00E+00 |
| 9.00E+00 | 9.00E+00 | 1.04E+03 | 9.00E+00 |
| 9.00E+00 | 9.00E+00 | 9.00E+00 | 5.24E+02 | 9.00E+00 | 9.00E+00 | 9.00E+00 | 9.00E+00 | 9.00E+00 | 9.00E+00 |
| 9.00E+00 |
| 9.00E+00 |
| 9.00E+00 | 9.00E+00 | 2.05E+03 | 9.00E+00 |
| 9.00E+00 | 9.00E+00 | 9.00E+00 | 9.00E+00 | 9.00E+00 | 1.02E+03 | 9.00E+00 | 5.05E+02 | 9.00E+00 | 9.00E+00 |
| 9.00E+00 |
| 9.00E+00 | 9.00E+00 | 9.00E+00 | 9.00E+00 | 5.21E+02 | 1.51E+03 | 1.03E+03 | 2.60E+03 | 9.00E+00 | 9.00E+00 |
| 1.71E+05 | 1.41E+05 | 1.63E+05 | 1.50E+05 | 1.42E+05 | 1.73E+05 | 1.41E+05 | 1.06E+05 | 1.30E+05 | 9.00E+00 |
| 9.00E+00 | 5.30E+03 | 4.04E+03 | 1.23E+03 | 1.21E+03 | 9.00E+00 | 1.62E+03 | 4.87E+03 | 4.96E+03 | 9.00E+00 |
| 3.28E+06 | 3.11E+06 | 2.54E+06 | 3.21E+06 | 3.02E+06 | 3.26E+06 | 3.51E+06 | 3.57E+06 | 2.78E+06 | 9.00E+00 |
| 5.72E+04 | 8.14E+04 | 7.50E+04 | 8.09E+04 | 2.93E+04 | 8.19E+04 | 9.62E+04 | 1.12E+05 | 1.03E+05 | 9.00E+00 |
| 3.22E+04 | 3.51E+04 | 3.07E+04 | 2.76E+04 | 2.74E+04 | 4.60E+04 | 2.30E+04 | 2.98E+04 | 3.45E+04 | 9.00E+00 |
| 1.91E+04 | 2.07E+04 | 3.27E+04 | 1.97E+04 | 2.13E+04 | 2.41E+04 | 3.95E+04 | 6.48E+04 | 4.17E+04 | 9.00E+00 |
| 9.00E+00 | 2.79E+03 | 9.00E+00 | 9.00E+00 | 3.02E+03 | 9.00E+00 | 9.00E+00 | 9.00E+00 | 9.00E+00 | 9.00E+00 |
| 3.46E+04 | 3.53E+04 | 4.21E+04 | 2.67E+04 | 4.02E+04 | 3.22E+04 | 4.35E+04 | 6.71E+04 | 4.79E+04 | 9.00E+00 |
| 6.23E+04 | 4.92E+04 | 6.61E+04 | 5.68E+04 | 6.39E+04 | 4.90E+04 | 8.65E+04 | 1.75E+05 | 8.42E+04 | 9.00E+00 |
| 8.61E+04 | 8.68E+04 | 1.14E+05 | 6.45E+04 | 7.52E+04 | 7.11E+04 | 7.92E+04 | 1.18E+05 | 8.49E+04 | 9.00E+00 |
| 9.00E+00 | 4.89E+03 | 9.00E+00 | 9.00E+00 | 9.00E+00 | 7.22E+03 | 2.40E+03 | 3.23E+03 | 8.13E+02 | 9.00E+00 |
| 1.82E+04 | 2.35E+04 | 3.84E+04 | 2.80E+04 | 2.88E+04 | 2.26E+04 | 4.12E+04 | 3.55E+04 | 3.41E+04 | 9.00E+00 |
| 1.11E+06 | 8.59E+05 | 1.11E+06 | 6.35E+05 | 1.18E+06 | 6.83E+05 | 8.80E+05 | 1.51E+06 | 6.97E+05 | 9.00E+00 |
| 1.39E+05 | 9.20E+04 | 1.32E+05 | 1.27E+05 | 1.47E+05 | 1.20E+05 | 1.20E+05 | 2.20E+05 | 1.11E+05 | 9.00E+00 |
| 1.06E+05 | 5.85E+04 | 1.44E+05 | 8.89E+04 | 1.17E+05 | 1.04E+05 | 8.29E+04 | 1.22E+05 | 8.45E+04 | 9.00E+00 |
| 7.97E+05 | 5.85E+05 | 1.05E+06 | 8.13E+05 | 6.89E+05 | 5.35E+05 | 8.38E+05 | 1.06E+06 | 7.71E+05 | 9.00E+00 |
| 5.64E+03 | 3.95E+03 | 9.00E+00 | 9.00E+00 | 9.00E+00 | 9.00E+00 | 6.18E+03 | 9.00E+00 | 9.00E+00 | 9.00E+00 |
| 9.00E+00 |
| 5.99E+06 | 4.24E+06 | 7.85E+06 | 5.69E+06 | 5.56E+06 | 4.23E+06 | 8.80E+06 | 1.08E+07 | 7.26E+06 | 9.00E+00 |
| 1.50E+07 | 1.21E+07 | 2.12E+07 | 1.39E+07 | 1.35E+07 | 1.27E+07 | 2.98E+07 | 4.41E+07 | 2.17E+07 | 9.00E+00 |
| 1.83E+04 | 7.37E+03 | 3.06E+04 | 2.19E+04 | 2.06E+04 | 1.44E+04 | 2.39E+04 | 4.58E+04 | 1.67E+04 | 9.00E+00 |
| 6.40E+03 | 4.57E+03 | 2.97E+03 | 4.13E+03 | 3.56E+03 | 5.02E+03 | 1.98E+03 | 5.63E+03 | 7.55E+03 | 9.00E+00 |
| 5.62E+04 | 3.75E+04 | 2.44E+04 | 4.34E+04 | 6.23E+04 | 4.45E+04 | 4.71E+04 | 8.92E+04 | 4.03E+04 | 9.00E+00 |
| 8.12E+03 | 9.00E+00 | 9.00E+00 | 9.00E+00 | 9.00E+00 | 4.64E+03 | 9.00E+00 | 9.00E+00 | 9.00E+00 | 9.00E+00 |
| 9.00E+00 | 9.60E+03 | 9.00E+00 |
| 3.41E+04 | 4.19E+04 | 2.54E+04 | 4.91E+04 | 4.83E+04 | 5.27E+04 | 3.33E+04 | 4.91E+04 | 2.70E+04 | 9.00E+00 |
| 6.39E+04 | 4.26E+04 | 9.26E+04 | 5.08E+04 | 4.80E+04 | 6.01E+04 | 6.89E+04 | 5.54E+04 | 3.06E+04 | 9.00E+00 |
| 4.84E+05 | 3.02E+05 | 8.86E+05 | 3.89E+05 | 5.23E+05 | 3.54E+05 | 9.21E+05 | 1.60E+06 | 7.52E+05 | 9.00E+00 |
| 2.74E+04 | 2.56E+04 | 5.01E+04 | 2.55E+04 | 2.91E+04 | 2.05E+04 | 5.90E+04 | 9.09E+04 | 3.98E+04 | 9.00E+00 |
| 1.71E+05 | 1.79E+05 | 1.40E+05 | 1.36E+05 | 1.61E+05 | 1.46E+05 | 1.61E+05 | 1.86E+05 | 1.62E+05 | 9.00E+00 |
| 7.78E+04 | 8.67E+04 | 7.28E+04 | 5.04E+04 | 7.23E+04 | 6.64E+04 | 8.28E+04 | 8.32E+04 | 9.65E+04 | 9.00E+00 |
| 4.51E+04 | 7.80E+04 | 4.90E+04 | 5.26E+04 | 3.98E+04 | 3.81E+04 | 2.82E+04 | 2.63E+04 | 4.03E+04 | 9.00E+00 |
| 9.77E+03 | 6.36E+03 | 1.27E+04 | 6.36E+03 | 1.87E+03 | 7.70E+03 | 1.95E+03 | 9.79E+03 | 3.44E+03 | 9.00E+00 |
| 4.86E+04 | 2.38E+04 | 4.72E+04 | 3.70E+04 | 2.36E+04 | 4.28E+04 | 3.99E+04 | 3.57E+04 | 3.67E+04 | 9.00E+00 |
| 9.00E+00 | 9.00E+00 | 9.00E+00 | 5.15E+02 | 9.00E+00 | 9.00E+00 | 9.00E+00 | 9.00E+00 | 9.00E+00 | 9.00E+00 |
| 9.00E+00 | 9.00E+00 | 9.00E+00 | 9.00E+00 | 9.91E+02 | 9.00E+00 | 9.00E+00 | 9.00E+00 | 9.00E+00 | 9.00E+00 |
| 9.00E+00 | 9.48E+02 | 9.00E+00 | 9.00E+00 |
| 3.33E+06 | 2.96E+06 | 3.04E+06 | 2.79E+06 | 2.94E+06 | 2.66E+06 | 3.11E+06 | 2.71E+06 | 3.09E+06 | 9.00E+00 |
| 6.83E+04 | 6.44E+04 | 9.20E+04 | 7.49E+04 | 7.26E+04 | 8.80E+04 | 6.72E+04 | 4.92E+04 | 7.87E+04 | 9.00E+00 |
| 1.21E+04 | 2.15E+04 | 2.13E+04 | 1.63E+04 | 9.76E+03 | 2.68E+04 | 2.36E+04 | 1.42E+04 | 3.58E+04 | 9.00E+00 |
| 9.00E+00 | 9.85E+02 | 9.00E+00 | 9.00E+00 | 9.00E+00 | 9.00E+00 | 9.00E+00 | 9.94E+02 | 9.00E+00 | 9.00E+00 |
| 1.31E+03 | 3.47E+03 | 8.62E+02 | 5.18E+03 | 9.00E+00 | 2.56E+03 | 8.43E+02 | 8.53E+02 | 2.21E+03 | 9.00E+00 |
| 1.98E+03 | 5.01E+02 | 9.95E+02 | 2.47E+03 | 5.01E+02 | 9.00E+00 | 9.00E+00 | 9.00E+00 | 9.00E+00 | 9.00E+00 |
| 9.00E+00 | 9.00E+00 | 4.19E+03 | 1.71E+03 | 9.00E+00 | 9.00E+00 | 8.85E+02 | 9.00E+00 | 9.00E+00 | 9.00E+00 |



|          |          |          |          |          |          |          |          |          |          |
|----------|----------|----------|----------|----------|----------|----------|----------|----------|----------|
| 1.05E+03 | 9.00E+00 | 5.15E+02 | 9.00E+00 |
| 3.24E+04 | 9.00E+00 |
| 1.21E+05 | 1.47E+05 | 1.92E+05 | 1.63E+05 | 1.58E+05 | 1.75E+05 | 1.50E+05 | 1.63E+05 | 1.25E+05 |          |
| 9.00E+00 | 2.56E+03 | 9.00E+00 |
| 9.09E+04 | 8.00E+04 | 1.09E+05 | 7.15E+04 | 1.04E+05 | 8.04E+04 | 1.02E+05 | 9.51E+04 | 8.29E+04 |          |
| 4.99E+04 | 2.93E+04 | 3.99E+04 | 3.50E+04 | 4.22E+04 | 3.83E+04 | 4.26E+04 | 1.41E+04 | 3.23E+04 |          |
| 9.00E+00 |
| 1.24E+03 | 8.46E+02 | 9.00E+00 | 9.00E+00 | 9.00E+00 | 9.00E+00 | 1.21E+03 | 9.00E+00 | 9.00E+00 |          |
| 4.08E+03 | 8.54E+03 | 9.00E+00 | 4.53E+03 | 3.13E+03 | 9.40E+03 | 4.05E+03 | 4.94E+03 | 9.00E+00 |          |
| 9.00E+00 |
| 6.41E+04 | 4.85E+04 | 7.52E+04 | 6.25E+04 | 6.42E+04 | 7.19E+04 | 6.17E+04 | 5.23E+04 | 6.47E+04 |          |
| 7.75E+06 | 6.82E+06 | 6.47E+06 | 6.99E+06 | 7.36E+06 | 7.12E+06 | 7.26E+06 | 8.00E+06 | 6.65E+06 |          |
| 1.61E+06 | 1.71E+06 | 1.68E+06 | 1.87E+06 | 1.58E+06 | 1.49E+06 | 1.81E+06 | 2.02E+06 | 2.01E+06 |          |
| 8.05E+04 | 8.55E+04 | 9.84E+04 | 8.93E+04 | 8.35E+04 | 8.05E+04 | 1.10E+05 | 1.18E+05 | 1.11E+05 |          |
| 5.77E+06 | 7.07E+06 | 6.39E+06 | 7.98E+06 | 5.92E+06 | 7.25E+06 | 6.98E+06 | 6.77E+06 | 7.87E+06 |          |
| 6.28E+04 | 6.24E+04 | 6.99E+04 | 6.65E+04 | 5.76E+04 | 5.82E+04 | 8.99E+04 | 1.00E+05 | 7.69E+04 |          |
| 3.83E+04 | 4.10E+04 | 6.15E+04 | 4.11E+04 | 4.26E+04 | 4.91E+04 | 5.53E+04 | 6.49E+04 | 7.15E+04 |          |
| 3.37E+05 | 3.05E+05 | 2.88E+05 | 3.06E+05 | 3.30E+05 | 2.89E+05 | 3.16E+05 | 2.74E+05 | 3.09E+05 |          |
| 2.67E+04 | 1.79E+04 | 3.96E+04 | 2.85E+04 | 3.07E+04 | 2.16E+04 | 4.49E+04 | 4.25E+04 | 2.48E+04 |          |
| 1.52E+04 | 2.33E+04 | 1.10E+04 | 2.57E+04 | 2.77E+04 | 1.88E+04 | 4.49E+04 | 3.06E+04 | 2.55E+04 |          |
| 9.00E+00 | 9.00E+00 | 4.03E+03 | 9.00E+00 | 4.01E+03 | 9.00E+00 | 9.00E+00 | 9.00E+00 | 9.00E+00 | 9.00E+00 |
| 2.74E+04 | 3.61E+04 | 6.80E+04 | 3.84E+04 | 6.12E+04 | 3.90E+04 | 4.96E+04 | 5.39E+04 | 5.35E+04 |          |
| 2.29E+04 | 2.37E+04 | 2.56E+04 | 3.23E+04 | 1.54E+04 | 8.91E+03 | 1.60E+04 | 2.69E+04 | 1.43E+04 |          |
| 9.00E+00 |
| 9.00E+00 | 9.00E+00 | 9.00E+00 | 9.00E+00 | 9.00E+00 | 9.00E+00 | 1.75E+04 | 1.84E+04 | 9.70E+03 |          |
| 9.00E+00 | 9.00E+00 | 9.00E+00 | 9.00E+00 | 3.21E+03 | 9.00E+00 | 9.00E+00 | 9.00E+00 | 9.00E+00 | 9.00E+00 |
| 3.41E+06 | 4.99E+06 | 6.03E+06 | 3.21E+06 | 4.99E+06 | 4.36E+06 | 7.22E+06 | 7.54E+06 | 6.10E+06 |          |
| 1.46E+05 | 1.04E+05 | 1.27E+05 | 9.14E+04 | 1.19E+05 | 1.42E+05 | 1.79E+05 | 2.01E+05 | 1.06E+05 |          |
| 1.43E+04 | 1.20E+04 | 7.49E+03 | 8.85E+03 | 1.12E+04 | 1.15E+04 | 1.72E+04 | 1.47E+04 | 1.31E+04 |          |
| 4.01E+06 | 4.02E+06 | 5.79E+06 | 4.54E+06 | 4.36E+06 | 4.33E+06 | 5.90E+06 | 4.80E+06 | 5.89E+06 |          |
| 3.22E+06 | 2.04E+06 | 3.06E+06 | 2.17E+06 | 2.09E+06 | 2.20E+06 | 4.63E+06 | 6.25E+06 | 3.75E+06 |          |
| 1.48E+05 | 1.99E+05 | 1.60E+05 | 1.86E+05 | 1.82E+05 | 2.78E+05 | 2.55E+05 | 2.28E+05 | 1.95E+05 |          |
| 9.00E+00 | 3.11E+03 | 9.00E+00 | 3.60E+03 | 9.00E+00 | 9.00E+00 | 1.11E+04 | 6.11E+03 | 4.71E+03 |          |
| 9.00E+00 | 9.00E+00 | 9.00E+00 | 9.00E+00 | 8.77E+03 | 9.00E+00 | 9.00E+00 | 1.76E+04 | 9.00E+00 |          |
| 2.09E+04 | 3.85E+04 | 4.26E+04 | 4.75E+04 | 3.41E+04 | 4.90E+04 | 3.91E+04 | 7.04E+04 | 4.18E+04 |          |
| 2.28E+05 | 2.22E+05 | 3.52E+05 | 1.50E+05 | 1.93E+05 | 2.02E+05 | 4.46E+05 | 5.82E+05 | 3.52E+05 |          |
| 4.16E+04 | 3.18E+04 | 4.16E+04 | 3.06E+04 | 4.25E+04 | 4.09E+04 | 4.10E+04 | 8.45E+04 | 4.94E+04 |          |
| 1.05E+05 | 9.07E+04 | 1.41E+05 | 6.83E+04 | 9.38E+04 | 1.01E+05 | 2.14E+05 | 3.01E+05 | 1.56E+05 |          |
| 3.79E+06 | 2.84E+06 | 4.12E+06 | 2.84E+06 | 2.30E+06 | 3.20E+06 | 5.23E+06 | 5.48E+06 | 3.84E+06 |          |
| 2.96E+04 | 1.21E+04 | 3.26E+04 | 2.08E+04 | 1.83E+04 | 2.82E+04 | 2.27E+04 | 2.71E+04 | 2.85E+04 |          |
| 5.02E+04 | 4.00E+04 | 3.34E+04 | 2.73E+04 | 2.97E+04 | 5.24E+04 | 4.48E+04 | 5.67E+04 | 3.72E+04 |          |
| 4.22E+06 | 3.29E+06 | 4.00E+06 | 3.23E+06 | 3.10E+06 | 3.41E+06 | 3.75E+06 | 3.87E+06 | 3.36E+06 |          |
| 1.40E+04 | 9.50E+03 | 1.01E+04 | 7.65E+03 | 8.20E+03 | 1.71E+04 | 1.43E+04 | 2.22E+04 | 1.44E+04 |          |
| 9.00E+00 | 9.00E+00 | 9.00E+00 | 6.78E+03 | 9.00E+00 | 9.00E+00 | 9.00E+00 | 9.00E+00 | 9.00E+00 | 9.00E+00 |
| 7.45E+04 | 2.31E+04 | 9.84E+04 | 8.34E+04 | 5.48E+04 | 6.69E+04 | 1.35E+05 | 1.28E+05 | 3.51E+04 |          |
| 8.42E+04 | 4.71E+04 | 9.60E+04 | 8.32E+04 | 5.85E+04 | 7.85E+04 | 1.34E+05 | 1.29E+05 | 1.03E+05 |          |
| 9.00E+00 |
| 6.00E+03 | 9.00E+00 | 7.71E+03 | 7.65E+03 | 3.66E+03 | 1.23E+03 | 9.00E+00 | 9.00E+00 | 6.46E+03 |          |
| 9.00E+00 | 3.45E+03 | 9.00E+00 |
| 2.17E+03 | 9.00E+00 | 1.19E+03 | 1.43E+03 | 2.35E+03 | 7.06E+02 | 9.00E+00 | 9.00E+00 | 9.00E+00 | 9.00E+00 |
| 3.14E+04 | 2.09E+04 | 2.00E+04 | 2.53E+04 | 3.43E+04 | 2.53E+04 | 2.70E+04 | 3.36E+04 | 2.86E+04 |          |
| 3.59E+05 | 2.74E+05 | 3.39E+05 | 2.58E+05 | 2.53E+05 | 3.00E+05 | 3.16E+05 | 3.52E+05 | 2.76E+05 |          |
| 7.25E+04 | 6.52E+04 | 8.15E+04 | 7.74E+04 | 8.49E+04 | 9.86E+04 | 6.67E+04 | 7.74E+04 | 7.01E+04 |          |
| 5.68E+03 | 8.08E+03 | 8.15E+03 | 4.02E+03 | 6.47E+03 | 9.69E+03 | 8.92E+03 | 2.83E+03 | 8.15E+03 |          |

|          |          |          |          |          |          |          |          |          |          |
|----------|----------|----------|----------|----------|----------|----------|----------|----------|----------|
| 9.00E+00 |
| 9.00E+00 | 9.00E+00 | 9.00E+00 | 1.10E+04 | 9.00E+00 | 9.00E+00 | 9.00E+00 | 9.00E+00 | 9.00E+00 | 9.00E+00 |
| 9.00E+00 |
| 9.00E+00 | 1.42E+03 | 9.00E+00 |
| 2.61E+06 | 2.70E+06 | 3.44E+06 | 2.96E+06 | 3.07E+06 | 3.23E+06 | 3.05E+06 | 3.26E+06 | 2.62E+06 |          |
| 3.32E+06 | 2.26E+06 | 4.25E+06 | 2.81E+06 | 3.45E+06 | 3.00E+06 | 5.68E+06 | 5.30E+06 | 3.52E+06 |          |
| 2.06E+05 | 2.24E+05 | 3.12E+05 | 2.42E+05 | 2.42E+05 | 2.71E+05 | 3.45E+05 | 3.92E+05 | 2.65E+05 |          |
| 3.16E+05 | 2.64E+05 | 6.20E+05 | 3.81E+05 | 3.89E+05 | 3.21E+05 | 5.29E+05 | 8.35E+05 | 4.70E+05 |          |
| 6.97E+04 | 7.64E+04 | 1.01E+05 | 8.42E+04 | 8.69E+04 | 8.70E+04 | 1.54E+05 | 1.65E+05 | 8.86E+04 |          |
| 1.57E+05 | 1.46E+05 | 2.23E+05 | 1.19E+05 | 1.45E+05 | 1.42E+05 | 3.93E+05 | 4.22E+05 | 2.20E+05 |          |
| 1.17E+07 | 7.95E+06 | 1.27E+07 | 9.16E+06 | 9.05E+06 | 9.83E+06 | 1.67E+07 | 1.94E+07 | 1.20E+07 |          |
| 2.24E+04 | 4.46E+04 | 6.93E+04 | 2.47E+04 | 2.75E+04 | 5.16E+04 | 2.84E+04 | 5.49E+04 | 2.00E+04 |          |
| 7.07E+05 | 4.88E+05 | 8.45E+05 | 5.53E+05 | 4.89E+05 | 4.94E+05 | 1.04E+06 | 1.21E+06 | 5.13E+05 |          |
| 9.00E+00 | 9.00E+00 | 9.00E+00 | 9.00E+00 | 9.00E+00 | 9.00E+00 | 4.51E+04 | 7.58E+04 | 3.66E+04 |          |
| 4.09E+06 | 3.16E+06 | 4.22E+06 | 3.84E+06 | 3.18E+06 | 3.71E+06 | 4.47E+06 | 5.45E+06 | 4.20E+06 |          |
| 1.54E+06 | 9.64E+05 | 1.60E+06 | 1.20E+06 | 9.91E+05 | 1.29E+06 | 2.57E+06 | 3.18E+06 | 1.98E+06 |          |
| 8.40E+04 | 1.09E+05 | 1.05E+05 | 1.00E+05 | 1.40E+05 | 1.59E+05 | 1.30E+05 | 1.02E+05 | 1.07E+05 |          |
| 4.89E+04 | 5.55E+04 | 1.40E+05 | 4.62E+04 | 8.75E+04 | 6.33E+04 | 1.17E+05 | 1.28E+05 | 6.71E+04 |          |
| 2.96E+05 | 1.79E+05 | 4.27E+05 | 2.52E+05 | 2.43E+05 | 1.88E+05 | 4.35E+05 | 7.56E+05 | 3.21E+05 |          |
| 1.41E+04 | 1.18E+04 | 1.86E+04 | 1.01E+04 | 6.43E+03 | 1.44E+04 | 2.94E+04 | 3.83E+04 | 8.28E+03 |          |
| 3.76E+04 | 3.27E+04 | 3.84E+04 | 1.69E+04 | 1.84E+04 | 2.48E+04 | 7.02E+04 | 8.50E+04 | 4.93E+04 |          |
| 2.66E+06 | 1.94E+06 | 2.63E+06 | 2.17E+06 | 2.13E+06 | 2.45E+06 | 2.86E+06 | 3.15E+06 | 2.43E+06 |          |
| 1.16E+04 | 1.15E+04 | 2.39E+04 | 1.38E+04 | 1.50E+04 | 1.00E+04 | 3.60E+03 | 1.73E+04 | 1.14E+04 |          |
| 7.85E+04 | 5.78E+04 | 1.44E+05 | 6.66E+04 | 5.69E+04 | 8.06E+04 | 1.82E+05 | 2.10E+05 | 9.39E+04 |          |
| 9.98E+04 | 4.98E+04 | 7.47E+04 | 6.28E+04 | 5.75E+04 | 6.20E+04 | 1.27E+05 | 1.51E+05 | 6.26E+04 |          |
| 1.17E+06 | 1.09E+06 | 1.22E+06 | 1.11E+06 | 1.03E+06 | 1.16E+06 | 1.09E+06 | 1.09E+06 | 1.15E+06 |          |
| 4.31E+04 | 2.43E+04 | 3.60E+04 | 4.80E+04 | 3.99E+04 | 2.97E+04 | 1.19E+05 | 2.16E+05 | 8.54E+04 |          |
| 5.69E+04 | 3.11E+04 | 7.89E+04 | 4.38E+04 | 2.74E+04 | 5.29E+04 | 1.38E+05 | 2.03E+05 | 9.66E+04 |          |
| 6.55E+04 | 6.45E+04 | 7.96E+04 | 1.01E+05 | 1.08E+05 | 1.06E+05 | 8.04E+04 | 4.45E+04 | 8.01E+04 |          |
| 1.46E+04 | 3.99E+03 | 3.21E+03 | 1.45E+04 | 1.60E+03 | 2.12E+04 | 5.64E+03 | 8.01E+02 | 7.25E+03 |          |
| 9.92E+02 | 9.00E+00 |          |
| 9.00E+00 | 9.00E+00 | 9.00E+00 | 9.00E+00 | 5.89E+03 | 8.15E+03 | 4.55E+03 | 1.43E+04 | 4.97E+03 |          |
| 2.50E+03 | 4.47E+03 | 1.61E+03 | 8.25E+02 | 2.52E+03 | 6.00E+03 | 9.00E+00 | 9.00E+00 | 9.00E+00 |          |
| 2.90E+03 | 9.00E+00 | 9.00E+00 | 9.00E+00 | 9.00E+00 | 4.00E+03 | 9.00E+00 | 9.00E+00 | 2.91E+03 |          |
| 2.41E+04 | 3.48E+04 | 1.63E+04 | 2.68E+04 | 1.66E+04 | 2.90E+04 | 1.42E+04 | 1.33E+04 | 2.31E+04 |          |
| 1.17E+03 | 9.00E+00 | 1.59E+03 | 9.00E+00 | 9.00E+00 | 9.00E+00 | 2.43E+03 | 2.00E+03 | 9.00E+00 |          |
| 9.00E+00 | 9.00E+00 | 3.82E+03 | 9.00E+00 | 9.00E+00 | 9.00E+00 | 9.00E+00 | 9.00E+00 | 9.00E+00 |          |
| 9.00E+00 |          |
| 1.04E+05 | 7.55E+04 | 9.08E+04 | 9.38E+04 | 1.08E+05 | 1.71E+05 | 5.36E+04 | 4.53E+04 | 6.49E+04 |          |
| 9.00E+00 |          |
| 8.90E+02 | 9.00E+00 |          |
| 9.00E+00 |          |
| 2.88E+04 | 2.10E+04 | 1.86E+04 | 3.86E+04 | 2.47E+04 | 3.08E+04 | 3.12E+04 | 3.16E+04 | 2.67E+04 |          |
| 2.14E+04 | 2.88E+04 | 1.91E+04 | 1.66E+04 | 1.75E+04 | 1.63E+04 | 2.52E+04 | 2.61E+04 | 2.17E+04 |          |
| 9.00E+00 | 1.39E+03 | 9.00E+00 |          |
| 4.51E+04 | 4.65E+04 | 4.23E+04 | 4.52E+04 | 3.03E+04 | 3.32E+04 | 3.54E+04 | 4.39E+04 | 2.93E+04 |          |
| 9.00E+00 | 9.00E+00 | 9.00E+00 | 9.00E+00 | 7.42E+03 | 5.75E+03 | 9.00E+00 | 9.00E+00 | 9.00E+00 |          |
| 3.13E+05 | 2.91E+05 | 2.62E+05 | 3.27E+05 | 2.74E+05 | 2.90E+05 | 2.84E+05 | 2.55E+05 | 2.76E+05 |          |
| 5.98E+04 | 3.75E+04 | 7.52E+04 | 1.59E+04 | 7.95E+04 | 7.40E+04 | 9.00E+00 | 9.00E+00 | 9.00E+00 |          |
| 2.21E+04 | 1.84E+04 | 2.69E+04 | 2.05E+04 | 1.11E+04 | 1.38E+04 | 2.16E+04 | 4.24E+04 | 1.88E+04 |          |
| 5.08E+04 | 3.46E+04 | 1.01E+05 | 4.52E+04 | 5.82E+04 | 6.73E+04 | 1.57E+05 | 2.21E+05 | 1.26E+05 |          |
| 1.57E+04 | 1.22E+04 | 1.87E+04 | 2.33E+04 | 1.63E+04 | 5.65E+03 | 5.22E+04 | 5.69E+04 | 4.57E+04 |          |
| 3.85E+04 | 2.44E+04 | 3.72E+04 | 3.77E+04 | 3.22E+04 | 3.60E+04 | 1.68E+05 | 1.85E+05 | 8.24E+04 |          |
| 2.79E+04 | 2.18E+04 | 4.26E+04 | 1.98E+04 | 3.57E+04 | 4.65E+04 | 3.53E+04 | 4.22E+04 | 4.05E+04 |          |

|          |          |          |          |          |          |          |          |          |          |
|----------|----------|----------|----------|----------|----------|----------|----------|----------|----------|
| 9.00E+00 |
| 3.86E+04 | 2.64E+04 | 4.97E+04 | 3.21E+04 | 4.39E+04 | 2.18E+04 | 4.55E+04 | 8.74E+04 | 4.06E+04 |          |
| 6.50E+04 | 6.72E+04 | 9.19E+04 | 7.50E+04 | 4.31E+04 | 7.64E+04 | 5.27E+04 | 3.94E+04 | 6.83E+04 |          |
| 1.68E+04 | 1.63E+04 | 5.11E+04 | 3.78E+04 | 2.27E+04 | 2.54E+04 | 5.94E+04 | 3.09E+04 | 3.87E+04 |          |
| 8.52E+03 | 1.91E+04 | 9.00E+00 | 1.92E+04 | 1.85E+04 | 1.65E+04 | 2.09E+04 | 1.35E+04 | 1.12E+04 |          |
| 2.05E+04 | 1.98E+04 | 4.04E+04 | 2.92E+04 | 2.87E+04 | 1.29E+04 | 4.63E+04 | 6.74E+04 | 3.46E+04 |          |
| 4.39E+06 | 5.47E+06 | 5.75E+06 | 4.96E+06 | 4.44E+06 | 4.45E+06 | 5.57E+06 | 5.04E+06 | 4.52E+06 |          |
| 3.04E+04 | 3.12E+04 | 6.48E+04 | 5.16E+04 | 4.62E+04 | 4.11E+04 | 8.47E+04 | 7.54E+04 | 4.36E+04 |          |
| 8.07E+05 | 7.91E+05 | 9.31E+05 | 1.06E+06 | 9.15E+05 | 7.71E+05 | 6.46E+05 | 7.43E+05 | 6.25E+05 |          |
| 2.01E+06 | 2.45E+06 | 2.76E+06 | 2.78E+06 | 1.52E+06 | 2.20E+06 | 2.34E+06 | 1.77E+06 | 2.22E+06 |          |
| 9.00E+00 |          |
| 9.00E+00 |          |
| 3.27E+06 | 2.46E+06 | 2.90E+06 | 2.77E+06 | 1.76E+06 | 2.83E+06 | 2.68E+06 | 2.21E+06 | 2.77E+06 |          |
| 2.80E+05 | 1.07E+05 | 2.93E+05 | 9.32E+04 | 2.91E+05 | 1.01E+05 | 3.10E+05 | 3.19E+05 | 3.11E+05 |          |
| 4.06E+05 | 4.18E+05 | 4.75E+05 | 4.09E+05 | 4.26E+05 | 4.06E+05 | 3.61E+05 | 4.06E+05 | 4.62E+05 |          |
| 3.13E+05 | 4.95E+05 | 3.46E+05 | 3.61E+05 | 3.53E+05 | 3.26E+05 | 4.81E+05 | 3.90E+05 | 3.69E+05 |          |
| 6.14E+06 | 8.36E+06 | 9.46E+06 | 7.13E+06 | 8.49E+06 | 1.09E+07 | 9.71E+06 | 1.00E+07 | 8.80E+06 |          |
| 1.38E+07 | 1.12E+07 | 1.50E+07 | 1.52E+07 | 1.23E+07 | 1.11E+07 | 1.34E+07 | 1.35E+07 | 1.29E+07 |          |
| 8.06E+05 | 9.10E+05 | 9.37E+05 | 8.17E+05 | 9.89E+05 | 1.04E+06 | 9.53E+05 | 8.33E+05 | 9.12E+05 |          |
| 9.00E+00 |          |
| 1.42E+06 | 1.57E+06 | 1.77E+06 | 1.62E+06 | 1.39E+06 | 2.06E+06 | 1.60E+06 | 1.98E+06 | 1.43E+06 |          |
| 9.00E+00 | 9.00E+00 | 3.15E+05 | 9.00E+00 | 9.00E+00 | 9.00E+00 | 9.00E+00 | 9.00E+00 | 2.93E+05 |          |
| 2.04E+06 | 1.83E+06 | 1.89E+06 | 1.97E+06 | 1.56E+06 | 1.88E+06 | 1.89E+06 | 1.85E+06 | 1.94E+06 |          |
| 1.42E+06 | 9.92E+05 | 1.38E+06 | 1.09E+06 | 1.38E+06 | 1.32E+06 | 1.22E+06 | 1.42E+06 | 1.43E+06 |          |
| 4.07E+05 | 4.05E+05 | 4.63E+05 | 4.46E+05 | 4.60E+05 | 4.88E+05 | 4.09E+05 | 4.61E+05 | 4.99E+05 |          |
| 2.77E+05 | 3.27E+05 | 2.94E+05 | 2.69E+05 | 2.10E+05 | 2.70E+05 | 2.00E+05 | 2.70E+05 | 2.54E+05 |          |
| 2.81E+07 | 2.73E+07 | 2.67E+07 | 2.57E+07 | 2.64E+07 | 2.84E+07 | 2.42E+07 | 2.79E+07 | 2.70E+07 |          |
| 4.84E+04 | 7.06E+04 | 9.32E+04 | 5.20E+04 | 6.97E+04 | 6.46E+04 | 5.95E+04 | 5.96E+04 | 4.89E+04 |          |
| 8.77E+05 | 9.76E+05 | 8.17E+05 | 1.19E+06 | 1.02E+06 | 1.12E+06 | 7.84E+05 | 9.92E+05 | 8.64E+05 |          |
| 4.35E+05 | 3.93E+05 | 4.37E+05 | 4.03E+05 | 4.23E+05 | 3.80E+05 | 4.25E+05 | 5.64E+05 | 4.90E+05 |          |
| 1.51E+05 | 3.79E+04 | 1.74E+05 | 1.44E+05 | 1.65E+05 | 1.85E+05 | 1.60E+05 | 1.91E+05 | 1.73E+05 |          |
| 4.20E+06 | 3.71E+06 | 4.25E+06 | 4.26E+06 | 3.84E+06 | 3.95E+06 | 4.44E+06 | 4.43E+06 | 3.96E+06 |          |
| 2.47E+05 | 3.11E+05 | 3.04E+05 | 2.31E+05 | 2.89E+05 | 2.73E+05 | 2.42E+05 | 2.72E+05 | 2.52E+05 |          |
| 5.84E+06 | 5.11E+06 | 5.97E+06 | 5.39E+06 | 5.97E+06 | 6.13E+06 | 4.73E+06 | 5.35E+06 | 5.29E+06 |          |
| 8.41E+05 | 6.74E+05 | 6.73E+05 | 6.86E+05 | 6.96E+05 | 5.56E+05 | 7.10E+05 | 6.89E+05 | 6.74E+05 |          |
| 4.92E+05 | 4.88E+05 | 5.14E+05 | 4.29E+05 | 4.11E+05 | 4.64E+05 | 4.55E+05 | 5.37E+05 | 4.83E+05 |          |
| 4.56E+05 | 4.67E+05 | 4.97E+05 | 4.39E+05 | 5.32E+05 | 4.78E+05 | 4.55E+05 | 5.33E+05 | 4.91E+05 |          |
| 9.00E+00 |          |
| 9.00E+00 |          |
| 9.00E+00 |          |
| 3.54E+04 | 9.13E+04 | 1.05E+05 | 7.48E+04 | 8.05E+04 | 1.09E+05 | 6.66E+04 | 1.27E+05 | 7.70E+04 |          |
| 2.73E+04 | 3.05E+04 | 3.53E+04 | 2.05E+04 | 2.12E+04 | 4.00E+04 | 2.49E+04 | 2.10E+04 | 4.26E+04 |          |
| 1.65E+05 | 1.47E+05 | 2.12E+05 | 1.61E+05 | 1.41E+05 | 1.79E+05 | 1.50E+05 | 2.55E+05 | 1.85E+05 |          |
| 3.34E+04 | 2.03E+04 | 3.07E+04 | 2.85E+04 | 2.02E+04 | 2.00E+04 | 2.07E+04 | 2.31E+04 | 1.72E+04 |          |
| 1.45E+04 | 1.77E+04 | 3.51E+04 | 1.70E+04 | 2.22E+04 | 1.88E+04 | 1.45E+04 | 3.09E+04 | 1.63E+04 |          |
| 8.06E+03 | 7.68E+03 | 2.25E+04 | 2.31E+03 | 6.67E+03 | 1.19E+04 | 1.41E+04 | 1.40E+04 | 1.49E+04 |          |
| 2.43E+04 | 1.72E+04 | 3.82E+04 | 2.80E+04 | 2.86E+04 | 2.16E+04 | 3.58E+04 | 6.51E+04 | 3.33E+04 |          |
| 6.43E+04 | 4.09E+04 | 7.97E+04 | 4.28E+04 | 4.40E+04 | 5.54E+04 | 1.14E+05 | 1.43E+05 | 7.36E+04 |          |
| 5.01E+03 | 6.59E+03 | 2.31E+03 | 9.25E+03 | 5.06E+03 | 3.87E+03 | 7.00E+03 | 1.08E+04 | 8.14E+03 |          |
| 9.00E+00 | 3.23E+03 | 1.17E+03 | 2.00E+03 | 7.99E+03 | 2.04E+03 | 1.24E+03 | 2.02E+03 | 3.20E+03 |          |
| 4.84E+04 | 5.52E+04 | 5.05E+04 | 4.68E+04 | 4.62E+04 | 5.77E+04 | 3.36E+04 | 3.49E+04 | 3.23E+04 |          |
| 1.42E+04 | 1.10E+04 | 1.04E+04 | 2.28E+04 | 1.28E+04 | 1.59E+04 | 1.57E+04 | 2.00E+04 | 1.75E+04 |          |
| 4.14E+05 | 4.25E+05 | 8.29E+05 | 4.30E+05 | 5.44E+05 | 5.27E+05 | 5.17E+05 | 9.40E+05 | 4.12E+05 |          |
| 3.17E+04 | 1.71E+04 | 3.61E+04 | 2.40E+04 | 3.10E+04 | 1.81E+04 | 4.61E+04 | 3.89E+04 | 1.08E+04 |          |

|          |          |          |          |          |          |          |          |          |
|----------|----------|----------|----------|----------|----------|----------|----------|----------|
| 5.52E+04 | 2.98E+04 | 1.18E+05 | 6.41E+04 | 5.14E+04 | 4.88E+04 | 8.79E+04 | 1.38E+05 | 7.65E+04 |
| 8.61E+06 | 6.22E+06 | 1.05E+07 | 7.25E+06 | 7.77E+06 | 7.59E+06 | 1.26E+07 | 1.95E+07 | 1.29E+07 |
| 4.26E+06 | 3.36E+06 | 4.69E+06 | 4.04E+06 | 4.11E+06 | 3.73E+06 | 4.74E+06 | 4.97E+06 | 4.15E+06 |
| 2.06E+06 | 1.42E+06 | 3.35E+06 | 2.03E+06 | 1.84E+06 | 1.49E+06 | 3.25E+06 | 5.80E+06 | 2.27E+06 |
| 1.42E+07 | 1.24E+07 | 1.44E+07 | 1.39E+07 | 1.38E+07 | 1.26E+07 | 1.01E+07 | 9.10E+06 | 8.28E+06 |
| 1.37E+04 | 8.82E+03 | 2.64E+04 | 9.43E+03 | 1.19E+04 | 9.44E+03 | 1.19E+04 | 3.03E+04 | 1.35E+04 |
| 3.47E+06 | 3.04E+06 | 5.35E+06 | 4.67E+06 | 3.39E+06 | 3.28E+06 | 6.85E+06 | 1.26E+07 | 6.63E+06 |
| 3.29E+07 | 3.12E+07 | 3.00E+07 | 3.05E+07 | 3.30E+07 | 3.07E+07 | 2.88E+07 | 3.20E+07 | 2.69E+07 |
| 4.99E+03 | 1.52E+04 | 8.66E+03 | 1.26E+04 | 5.60E+03 | 8.69E+03 | 9.41E+03 | 4.53E+03 | 5.80E+03 |
| 2.45E+06 | 2.02E+06 | 3.26E+06 | 2.52E+06 | 2.26E+06 | 2.31E+06 | 5.33E+06 | 7.89E+06 | 4.41E+06 |
| 6.22E+04 | 4.56E+04 | 6.04E+04 | 6.76E+04 | 6.29E+04 | 5.72E+04 | 4.39E+04 | 6.72E+04 | 4.75E+04 |
| 3.87E+06 | 2.90E+06 | 5.41E+06 | 4.22E+06 | 4.54E+06 | 4.41E+06 | 1.23E+07 | 2.13E+07 | 1.57E+07 |
| 1.82E+07 | 1.69E+07 | 1.50E+07 | 1.82E+07 | 1.69E+07 | 1.68E+07 | 1.86E+07 | 1.96E+07 | 1.84E+07 |
| 1.39E+05 | 1.37E+05 | 1.97E+05 | 1.46E+05 | 1.90E+05 | 1.28E+05 | 4.97E+05 | 7.13E+05 | 4.04E+05 |
| 4.83E+04 | 2.23E+04 | 4.34E+04 | 2.45E+04 | 3.66E+04 | 2.64E+04 | 2.81E+04 | 5.48E+04 | 6.43E+04 |
| 2.64E+04 | 1.57E+04 | 2.68E+04 | 1.58E+04 | 2.85E+04 | 1.63E+04 | 7.26E+04 | 1.11E+05 | 6.39E+04 |
| 9.00E+00 | 1.54E+03 | 2.92E+03 | 9.00E+00 | 9.00E+00 | 9.00E+00 | 9.00E+00 | 9.00E+00 | 9.00E+00 |
| 1.07E+06 | 8.78E+05 | 9.41E+05 | 9.27E+05 | 1.15E+06 | 8.79E+05 | 1.73E+06 | 1.67E+06 | 1.54E+06 |
| 3.20E+05 | 2.60E+05 | 4.44E+05 | 3.56E+05 | 3.97E+05 | 2.78E+05 | 4.25E+05 | 5.34E+05 | 3.58E+05 |
| 5.21E+05 | 3.50E+05 | 6.12E+05 | 4.90E+05 | 4.80E+05 | 4.32E+05 | 8.67E+05 | 1.27E+06 | 7.80E+05 |
| 3.18E+05 | 2.92E+05 | 3.71E+05 | 3.32E+05 | 2.91E+05 | 2.99E+05 | 8.72E+05 | 1.15E+06 | 8.06E+05 |
| 1.08E+06 | 8.43E+05 | 1.27E+06 | 1.05E+06 | 1.04E+06 | 9.47E+05 | 2.27E+06 | 3.41E+06 | 2.55E+06 |
| 9.68E+03 | 8.44E+03 | 1.20E+04 | 1.11E+04 | 1.25E+04 | 9.36E+03 | 1.20E+04 | 2.12E+04 | 1.19E+04 |
| 1.55E+04 | 1.51E+04 | 1.78E+04 | 9.24E+03 | 1.25E+04 | 8.42E+03 | 9.00E+00 | 1.21E+04 | 1.82E+04 |
| 1.49E+05 | 9.90E+04 | 1.33E+05 | 9.58E+04 | 8.67E+04 | 1.28E+05 | 1.14E+05 | 8.65E+04 | 8.78E+04 |
| 6.57E+03 | 5.32E+03 | 6.38E+03 | 8.50E+03 | 5.77E+03 | 7.67E+03 | 8.20E+03 | 5.92E+03 | 6.99E+03 |
| 6.43E+04 | 4.31E+04 | 5.03E+04 | 5.11E+04 | 4.24E+04 | 4.92E+04 | 4.06E+04 | 3.46E+04 | 4.95E+04 |
| 1.39E+06 | 1.02E+06 | 1.21E+06 | 1.09E+06 | 1.11E+06 | 1.14E+06 | 1.04E+06 | 7.21E+05 | 8.03E+05 |
| 7.07E+03 | 5.63E+03 | 5.77E+03 | 7.00E+03 | 5.39E+03 | 7.24E+03 | 1.06E+04 | 9.73E+03 | 9.91E+03 |
| 2.36E+05 | 1.73E+05 | 3.18E+05 | 2.63E+05 | 1.92E+05 | 2.05E+05 | 2.85E+05 | 6.00E+05 | 2.50E+05 |
| 1.92E+04 | 1.07E+04 | 9.56E+03 | 8.07E+03 | 6.60E+03 | 4.93E+03 | 9.00E+00 | 9.00E+00 | 9.00E+00 |
| 4.87E+03 | 1.50E+03 | 1.80E+03 | 1.89E+03 | 8.86E+02 | 5.52E+03 | 6.04E+03 | 9.00E+00 | 9.00E+00 |
| 9.00E+00 | 9.00E+00 | 3.09E+03 | 9.00E+00 | 9.00E+00 | 9.00E+00 | 9.00E+00 | 2.78E+03 | 9.00E+00 |
| 8.42E+04 | 7.49E+04 | 8.55E+04 | 7.81E+04 | 6.24E+04 | 9.05E+04 | 7.14E+04 | 5.76E+04 | 6.77E+04 |
| 1.16E+05 | 9.31E+04 | 1.02E+05 | 8.18E+04 | 8.70E+04 | 9.30E+04 | 7.49E+04 | 9.92E+04 | 1.83E+04 |
| 2.23E+06 | 1.59E+06 | 1.96E+06 | 1.81E+06 | 1.60E+06 | 1.96E+06 | 1.72E+06 | 1.25E+06 | 1.53E+06 |
| 3.50E+04 | 3.75E+04 | 4.11E+04 | 4.95E+04 | 4.09E+04 | 3.00E+04 | 3.52E+04 | 2.90E+04 | 3.74E+04 |
| 7.22E+05 | 8.90E+05 | 1.17E+06 | 6.04E+05 | 8.25E+05 | 7.86E+05 | 1.30E+06 | 2.23E+06 | 1.41E+06 |
| 1.68E+05 | 1.55E+05 | 1.60E+05 | 1.18E+05 | 1.45E+05 | 1.31E+05 | 1.40E+05 | 1.67E+05 | 1.44E+05 |
| 1.24E+05 | 1.50E+05 | 1.25E+05 | 1.01E+05 | 1.01E+05 | 1.25E+05 | 9.64E+04 | 5.45E+04 | 7.34E+04 |
| 9.69E+04 | 1.09E+05 | 1.03E+05 | 9.42E+04 | 6.32E+04 | 1.06E+05 | 9.66E+04 | 8.13E+04 | 6.68E+04 |
| 9.00E+00 |
| 9.00E+00 | 9.00E+00 | 5.73E+03 | 9.00E+00 | 9.00E+00 | 9.00E+00 | 9.00E+00 | 9.00E+00 | 9.00E+00 |
| 9.00E+00 | 8.96E+02 |
| 1.67E+04 | 1.61E+04 | 3.01E+04 | 1.98E+04 | 2.30E+04 | 1.65E+04 | 3.35E+04 | 5.83E+04 | 4.20E+04 |
| 5.18E+05 | 3.03E+05 | 4.41E+05 | 3.08E+05 | 2.11E+05 | 3.33E+05 | 3.10E+05 | 7.54E+05 | 4.77E+05 |
| 7.90E+06 | 7.62E+06 | 9.13E+06 | 7.23E+06 | 7.73E+06 | 8.00E+06 | 8.65E+06 | 1.45E+07 | 1.06E+07 |
| 2.56E+05 | 3.27E+05 | 3.80E+05 | 2.76E+05 | 3.21E+05 | 3.78E+05 | 4.68E+05 | 4.98E+05 | 5.00E+05 |
| 5.90E+05 | 4.90E+05 | 7.57E+05 | 7.10E+05 | 5.27E+05 | 5.38E+05 | 9.54E+05 | 1.16E+06 | 8.17E+05 |
| 6.21E+05 | 7.31E+05 | 7.73E+05 | 7.75E+05 | 7.64E+05 | 7.91E+05 | 6.28E+05 | 8.85E+05 | 6.62E+05 |
| 3.52E+04 | 3.89E+04 | 4.40E+04 | 5.36E+04 | 7.25E+04 | 8.46E+04 | 5.80E+04 | 7.15E+04 | 1.76E+04 |
| 2.20E+05 | 2.29E+05 | 2.85E+05 | 2.63E+05 | 2.76E+05 | 2.40E+05 | 2.54E+05 | 3.11E+05 | 2.06E+05 |
| 1.17E+05 | 2.01E+05 | 2.26E+05 | 2.39E+05 | 1.79E+05 | 2.23E+05 | 1.59E+05 | 2.44E+05 | 2.41E+05 |
| 3.24E+03 | 3.37E+03 | 4.53E+03 | 1.39E+03 | 7.92E+02 | 1.98E+03 | 1.19E+03 | 3.37E+03 | 2.58E+03 |

|          |          |          |          |          |          |          |          |          |
|----------|----------|----------|----------|----------|----------|----------|----------|----------|
| 5.87E+04 | 1.04E+05 | 1.29E+05 | 9.30E+04 | 7.87E+04 | 7.71E+04 | 8.72E+04 | 1.23E+05 | 5.96E+04 |
| 7.84E+02 | 2.37E+03 | 3.93E+03 | 1.98E+03 | 1.97E+03 | 2.76E+03 | 1.17E+03 | 1.97E+03 | 1.15E+03 |
| 5.37E+04 | 6.47E+04 | 3.50E+04 | 5.23E+04 | 6.00E+04 | 5.55E+04 | 5.84E+04 | 4.53E+04 | 6.13E+04 |
| 6.97E+04 | 6.43E+04 | 8.15E+04 | 1.00E+05 | 8.34E+04 | 9.27E+04 | 7.85E+04 | 9.09E+04 | 3.29E+04 |
| 6.81E+04 | 5.56E+04 | 8.49E+04 | 6.43E+04 | 6.06E+04 | 6.69E+04 | 7.00E+04 | 1.07E+05 | 8.20E+04 |
| 3.20E+04 | 6.09E+04 | 6.02E+04 | 2.42E+04 | 1.82E+04 | 2.75E+04 | 5.49E+04 | 3.44E+04 | 4.82E+04 |
| 1.29E+05 | 1.61E+05 | 1.91E+05 | 2.18E+05 | 1.56E+05 | 1.48E+05 | 1.62E+05 | 2.46E+05 | 1.58E+05 |
| 2.42E+04 | 3.59E+04 | 2.19E+04 | 3.60E+04 | 4.09E+04 | 3.68E+04 | 4.65E+04 | 8.33E+04 | 2.87E+04 |
| 9.00E+00 | 9.00E+00 | 1.84E+04 | 9.00E+00 | 9.00E+00 | 1.91E+04 | 1.32E+04 | 2.67E+04 | 1.39E+04 |
| 5.39E+03 | 1.05E+04 | 7.50E+03 | 2.66E+03 | 7.74E+03 | 6.33E+03 | 8.00E+03 | 7.12E+03 | 6.14E+03 |
| 9.00E+00 |
| 7.10E+03 | 9.72E+03 | 1.02E+04 | 5.84E+03 | 6.04E+03 | 8.93E+03 | 1.02E+04 | 1.87E+04 | 1.19E+04 |
| 9.00E+00 | 1.42E+04 | 1.02E+04 | 6.82E+03 | 7.21E+03 | 8.96E+03 | 1.02E+04 | 1.75E+04 | 1.08E+04 |
| 2.85E+03 | 2.60E+03 | 2.60E+03 | 1.75E+03 | 1.74E+03 | 3.46E+03 | 2.51E+03 | 3.46E+03 | 3.06E+03 |
| 2.01E+05 | 1.86E+05 | 2.97E+05 | 1.80E+05 | 1.82E+05 | 2.25E+05 | 1.82E+05 | 2.38E+05 | 2.52E+05 |
| 2.46E+06 | 2.89E+06 | 2.76E+06 | 2.21E+06 | 2.41E+06 | 2.69E+06 | 2.83E+06 | 3.67E+06 | 3.22E+06 |
| 1.09E+06 | 1.32E+06 | 1.98E+06 | 1.18E+06 | 1.03E+06 | 1.43E+06 | 1.23E+06 | 1.54E+06 | 1.37E+06 |
| 4.38E+04 | 4.87E+04 | 6.35E+04 | 3.79E+04 | 4.47E+04 | 4.71E+04 | 5.64E+04 | 7.28E+04 | 4.17E+04 |
| 2.36E+06 | 2.45E+06 | 2.48E+06 | 2.09E+06 | 2.30E+06 | 2.35E+06 | 2.85E+06 | 3.24E+06 | 3.08E+06 |
| 8.00E+04 | 1.15E+05 | 1.40E+05 | 9.61E+04 | 1.10E+05 | 1.36E+05 | 8.75E+04 | 1.05E+05 | 9.76E+04 |
| 2.66E+04 | 5.45E+04 | 5.44E+04 | 2.78E+04 | 3.04E+04 | 4.66E+04 | 3.81E+04 | 5.18E+04 | 3.16E+04 |
| 6.11E+04 | 7.16E+04 | 1.03E+05 | 4.86E+04 | 5.26E+04 | 5.81E+04 | 1.26E+05 | 2.13E+05 | 1.08E+05 |
| 1.52E+06 | 1.56E+06 | 1.95E+06 | 1.24E+06 | 1.34E+06 | 1.37E+06 | 2.37E+06 | 2.88E+06 | 2.49E+06 |
| 5.05E+05 | 5.66E+05 | 6.83E+05 | 5.45E+05 | 5.78E+05 | 6.24E+05 | 6.19E+05 | 7.16E+05 | 6.49E+05 |
| 5.54E+04 | 4.60E+04 | 7.10E+04 | 3.75E+04 | 5.15E+04 | 5.08E+04 | 1.15E+05 | 1.45E+05 | 1.09E+05 |
| 5.97E+06 | 5.40E+06 | 5.47E+06 | 4.62E+06 | 4.67E+06 | 5.24E+06 | 6.43E+06 | 6.87E+06 | 6.39E+06 |
| 3.55E+06 | 3.46E+06 | 3.85E+06 | 3.25E+06 | 3.16E+06 | 3.57E+06 | 4.05E+06 | 4.45E+06 | 4.43E+06 |
| 4.14E+05 | 5.10E+05 | 5.69E+05 | 4.07E+05 | 3.95E+05 | 8.84E+05 | 4.39E+05 | 4.85E+05 | 5.02E+05 |
| 1.98E+05 | 2.70E+05 | 4.51E+05 | 2.57E+05 | 2.35E+05 | 3.37E+05 | 2.18E+05 | 2.51E+05 | 2.85E+05 |
| 1.23E+06 | 1.46E+06 | 1.48E+06 | 1.32E+06 | 1.22E+06 | 1.27E+06 | 1.20E+06 | 1.42E+06 | 1.14E+06 |
| 4.50E+06 | 4.14E+06 | 3.65E+06 | 4.21E+06 | 3.61E+06 | 5.21E+06 | 4.52E+06 | 5.98E+06 | 5.91E+06 |
| 3.00E+04 | 4.70E+04 | 4.60E+04 | 3.87E+04 | 3.46E+04 | 5.16E+04 | 2.93E+04 | 4.42E+04 | 4.24E+04 |
| 3.23E+03 | 6.56E+03 | 8.48E+03 | 3.38E+03 | 4.75E+03 | 9.50E+03 | 5.33E+03 | 9.27E+03 | 1.09E+04 |
| 1.24E+06 | 1.43E+06 | 2.26E+06 | 1.46E+06 | 1.23E+06 | 1.63E+06 | 1.31E+06 | 1.79E+06 | 1.54E+06 |
| 2.19E+05 | 2.43E+05 | 3.53E+05 | 2.07E+05 | 2.20E+05 | 2.87E+05 | 2.95E+05 | 3.19E+05 | 3.25E+05 |
| 3.92E+05 | 5.13E+05 | 5.29E+05 | 4.57E+05 | 3.51E+05 | 4.44E+05 | 4.05E+05 | 5.34E+05 | 4.11E+05 |
| 4.24E+05 | 6.14E+05 | 6.55E+05 | 5.09E+05 | 2.60E+05 | 3.31E+05 | 6.74E+05 | 5.21E+05 | 5.64E+05 |
| 7.08E+04 | 1.15E+05 | 1.13E+05 | 8.24E+04 | 8.91E+04 | 1.26E+05 | 8.24E+04 | 1.00E+05 | 9.71E+04 |
| 1.61E+05 | 2.61E+05 | 3.56E+05 | 1.90E+05 | 1.86E+05 | 3.99E+05 | 1.98E+05 | 2.39E+05 | 2.55E+05 |
| 9.00E+00 | 9.00E+00 | 9.00E+00 | 9.00E+00 | 9.00E+00 | 9.02E+03 | 1.53E+03 | 3.05E+03 | 6.84E+03 |
| 1.19E+05 | 1.87E+05 | 1.98E+05 | 1.31E+05 | 1.16E+05 | 1.61E+05 | 1.54E+05 | 2.12E+05 | 1.24E+05 |
| 9.49E+04 | 9.65E+04 | 1.56E+05 | 1.05E+05 | 1.01E+05 | 1.22E+05 | 1.25E+05 | 1.50E+05 | 1.22E+05 |
| 1.05E+05 | 1.41E+05 | 2.13E+05 | 9.87E+04 | 8.50E+04 | 1.24E+05 | 1.92E+05 | 3.04E+05 | 1.38E+05 |
| 2.41E+06 | 2.52E+06 | 3.22E+06 | 2.27E+06 | 2.17E+06 | 2.59E+06 | 3.21E+06 | 3.82E+06 | 3.23E+06 |
| 7.00E+05 | 8.27E+05 | 1.01E+06 | 6.68E+05 | 7.28E+05 | 8.70E+05 | 7.25E+05 | 7.99E+05 | 8.19E+05 |
| 3.26E+06 | 3.09E+06 | 3.93E+06 | 2.28E+06 | 3.10E+06 | 3.14E+06 | 4.05E+06 | 4.61E+06 | 4.53E+06 |
| 2.76E+06 | 2.57E+06 | 2.59E+06 | 2.29E+06 | 2.33E+06 | 2.47E+06 | 3.18E+06 | 3.39E+06 | 3.11E+06 |
| 6.13E+05 | 9.67E+05 | 1.16E+06 | 5.55E+05 | 5.45E+05 | 1.07E+06 | 5.30E+05 | 7.86E+05 | 6.94E+05 |
| 2.67E+04 | 3.66E+04 | 6.33E+04 | 2.14E+04 | 2.55E+04 | 2.78E+04 | 5.25E+04 | 8.49E+04 | 4.92E+04 |
| 5.57E+04 | 5.06E+04 | 8.05E+04 | 4.96E+04 | 4.61E+04 | 5.76E+04 | 8.69E+04 | 1.18E+05 | 7.22E+04 |
| 1.29E+04 | 8.72E+03 | 4.14E+04 | 3.28E+04 | 5.20E+03 | 2.27E+04 | 2.92E+04 | 1.62E+04 | 3.34E+04 |
| 8.43E+05 | 6.88E+05 | 1.15E+06 | 5.78E+05 | 6.20E+05 | 6.52E+05 | 7.62E+05 | 8.17E+05 | 7.27E+05 |
| 4.32E+05 | 5.28E+05 | 4.84E+05 | 3.44E+05 | 4.20E+05 | 4.68E+05 | 5.03E+05 | 5.82E+05 | 5.44E+05 |
| 2.49E+07 | 2.40E+07 | 2.65E+07 | 2.17E+07 | 2.19E+07 | 2.48E+07 | 2.78E+07 | 3.18E+07 | 3.05E+07 |

|          |          |          |          |          |          |          |          |          |
|----------|----------|----------|----------|----------|----------|----------|----------|----------|
| 1.68E+04 | 9.74E+03 | 3.44E+04 | 1.01E+04 | 2.12E+04 | 3.56E+04 | 5.24E+04 | 1.10E+05 | 3.60E+04 |
| 2.30E+04 | 2.67E+04 | 4.75E+04 | 2.40E+04 | 1.97E+04 | 2.30E+04 | 4.01E+04 | 7.83E+04 | 5.06E+04 |
| 9.00E+00 | 9.00E+00 | 9.00E+00 | 2.20E+03 | 9.00E+00 | 9.00E+00 | 9.00E+00 | 5.23E+03 | 5.38E+03 |
| 1.02E+04 | 5.37E+03 | 8.86E+03 | 2.43E+03 | 6.05E+03 | 1.25E+04 | 3.84E+04 | 5.13E+04 | 2.55E+04 |
| 3.96E+03 | 1.05E+04 | 1.60E+04 | 6.31E+03 | 2.97E+03 | 1.48E+04 | 4.67E+03 | 5.73E+03 | 1.14E+04 |
| 9.00E+00 | 9.00E+00 | 4.80E+03 | 9.00E+00 | 9.00E+00 | 9.00E+00 | 9.00E+00 | 9.00E+00 | 9.00E+00 |
| 4.57E+05 | 8.97E+05 | 9.50E+05 | 4.40E+05 | 4.49E+05 | 9.73E+05 | 5.76E+05 | 7.59E+05 | 7.77E+05 |
| 2.76E+05 | 4.59E+05 | 3.86E+05 | 2.63E+05 | 2.79E+05 | 3.14E+05 | 3.73E+05 | 4.65E+05 | 3.95E+05 |
| 1.51E+05 | 2.39E+05 | 2.81E+05 | 1.32E+05 | 1.44E+05 | 2.71E+05 | 1.92E+05 | 2.63E+05 | 2.45E+05 |
| 3.14E+05 | 4.78E+05 | 5.71E+05 | 3.00E+05 | 2.89E+05 | 4.86E+05 | 4.22E+05 | 5.48E+05 | 5.37E+05 |
| 4.74E+03 | 1.12E+04 | 1.48E+04 | 3.41E+03 | 7.10E+03 | 1.13E+04 | 5.75E+03 | 6.90E+03 | 5.63E+03 |
| 9.16E+03 | 1.21E+04 | 1.57E+04 | 7.28E+03 | 8.11E+03 | 1.25E+04 | 1.41E+04 | 1.96E+04 | 1.76E+04 |
| 4.80E+03 | 8.84E+03 | 9.89E+03 | 4.66E+03 | 3.86E+03 | 9.69E+03 | 7.35E+03 | 7.21E+03 | 1.06E+04 |
| 9.00E+00 | 9.00E+00 | 4.41E+03 | 9.00E+00 | 1.55E+03 | 9.00E+00 | 9.00E+00 | 1.01E+03 | 9.00E+00 |
| 9.00E+00 | 9.00E+00 | 9.00E+00 | 9.00E+00 | 9.00E+00 | 3.69E+03 | 9.00E+00 | 9.00E+00 | 9.00E+00 |
| 1.03E+03 | 5.52E+03 | 4.20E+03 | 2.49E+03 | 2.05E+03 | 7.16E+03 | 5.01E+03 | 6.21E+03 | 7.75E+03 |
| 4.94E+03 | 5.51E+03 | 7.29E+03 | 4.75E+03 | 3.62E+03 | 4.69E+03 | 6.41E+03 | 1.08E+04 | 5.84E+03 |
| 9.00E+00 | 1.32E+03 | 1.45E+03 | 1.07E+03 | 6.61E+02 | 1.28E+03 | 9.00E+00 | 9.00E+00 | 1.20E+03 |
| 2.93E+03 | 1.95E+03 | 7.77E+03 | 1.46E+03 | 1.48E+03 | 7.77E+03 | 9.00E+00 | 1.47E+03 | 2.92E+03 |
| 1.23E+03 | 9.00E+00 | 3.20E+03 | 2.45E+03 | 7.39E+02 | 4.39E+03 | 1.26E+03 | 1.60E+03 | 9.00E+00 |
| 4.05E+05 | 5.69E+05 | 4.47E+05 | 3.38E+05 | 4.30E+05 | 4.46E+05 | 6.12E+05 | 7.21E+05 | 7.34E+05 |
| 6.06E+06 | 7.38E+06 | 8.13E+06 | 5.95E+06 | 5.07E+06 | 7.75E+06 | 6.61E+06 | 8.82E+06 | 7.45E+06 |
| 4.34E+06 | 4.47E+06 | 4.96E+06 | 3.97E+06 | 3.98E+06 | 4.03E+06 | 5.90E+06 | 6.77E+06 | 6.37E+06 |
| 1.65E+05 | 2.53E+05 | 3.29E+05 | 2.08E+05 | 2.04E+05 | 3.46E+05 | 2.16E+05 | 2.45E+05 | 2.67E+05 |
| 9.77E+05 | 1.14E+06 | 1.35E+06 | 9.77E+05 | 9.32E+05 | 1.09E+06 | 1.78E+06 | 1.94E+06 | 1.96E+06 |
| 5.11E+04 | 5.81E+04 | 6.56E+04 | 5.92E+04 | 5.22E+04 | 5.38E+04 | 8.74E+04 | 9.50E+04 | 1.04E+05 |
| 3.32E+05 | 3.68E+05 | 4.26E+05 | 3.05E+05 | 3.40E+05 | 3.53E+05 | 4.94E+05 | 5.66E+05 | 5.02E+05 |
| 3.71E+05 | 5.11E+05 | 4.72E+05 | 2.73E+05 | 3.11E+05 | 5.09E+05 | 4.79E+05 | 3.48E+05 | 5.87E+05 |
| 1.15E+06 | 1.36E+06 | 1.79E+06 | 1.03E+06 | 9.86E+05 | 1.49E+06 | 1.08E+06 | 1.67E+06 | 1.41E+06 |
| 1.71E+04 | 3.01E+04 | 2.94E+04 | 2.41E+04 | 2.30E+04 | 4.36E+04 | 1.74E+04 | 3.02E+04 | 3.53E+04 |
| 3.08E+04 | 2.72E+04 | 6.07E+04 | 3.30E+04 | 2.32E+04 | 4.54E+04 | 3.23E+04 | 4.79E+04 | 3.87E+04 |
| 2.42E+03 | 7.71E+03 | 1.20E+04 | 9.00E+00 | 2.38E+03 | 1.05E+04 | 9.00E+00 | 9.00E+00 | 9.00E+00 |
| 5.91E+06 | 7.13E+06 | 8.03E+06 | 6.01E+06 | 5.06E+06 | 7.73E+06 | 6.43E+06 | 8.66E+06 | 7.16E+06 |
| 1.13E+06 | 1.27E+06 | 2.08E+06 | 1.46E+06 | 1.37E+06 | 1.92E+06 | 1.45E+06 | 2.00E+06 | 1.89E+06 |
| 4.15E+04 | 5.13E+04 | 8.68E+04 | 4.93E+04 | 5.08E+04 | 1.01E+05 | 6.02E+04 | 5.63E+04 | 6.65E+04 |
| 6.13E+03 | 1.03E+04 | 1.37E+04 | 6.29E+03 | 5.42E+03 | 1.29E+04 | 9.00E+00 | 4.10E+03 | 9.00E+00 |
| 9.00E+00 |
| 7.44E+03 | 7.69E+03 | 1.20E+04 | 7.74E+03 | 7.41E+03 | 1.27E+04 | 1.02E+04 | 1.16E+04 | 9.04E+03 |
| 1.02E+05 | 1.39E+05 | 1.78E+05 | 3.98E+04 | 9.16E+04 | 1.65E+05 | 1.65E+05 | 1.99E+05 | 1.35E+05 |
| 6.82E+04 | 9.34E+04 | 1.15E+05 | 7.67E+04 | 6.87E+04 | 9.43E+04 | 1.21E+05 | 1.36E+05 | 1.26E+05 |
| 3.23E+05 | 3.49E+05 | 3.87E+05 | 2.87E+05 | 3.37E+05 | 3.70E+05 | 5.27E+05 | 5.87E+05 | 5.28E+05 |
| 7.09E+06 | 7.01E+06 | 7.80E+06 | 6.70E+06 | 6.68E+06 | 7.66E+06 | 9.61E+06 | 9.86E+06 | 9.31E+06 |
| 5.00E+04 | 8.27E+04 | 8.75E+04 | 4.38E+04 | 4.48E+04 | 9.77E+04 | 4.90E+04 | 6.27E+04 | 6.29E+04 |
| 1.85E+04 | 3.27E+04 | 3.23E+04 | 2.32E+04 | 2.36E+04 | 1.97E+04 | 3.29E+04 | 4.79E+04 | 3.62E+04 |
| 2.34E+04 | 3.05E+04 | 3.90E+04 | 2.38E+04 | 2.17E+04 | 3.00E+04 | 4.82E+04 | 5.56E+04 | 5.32E+04 |
| 4.05E+05 | 3.43E+05 | 3.87E+05 | 3.32E+05 | 3.16E+05 | 3.51E+05 | 4.19E+05 | 4.61E+05 | 4.48E+05 |
| 5.57E+06 | 5.58E+06 | 5.30E+06 | 4.83E+06 | 5.23E+06 | 5.07E+06 | 6.08E+06 | 6.69E+06 | 6.64E+06 |
| 4.59E+05 | 4.12E+05 | 4.10E+05 | 3.54E+05 | 3.92E+05 | 4.04E+05 | 4.93E+05 | 5.43E+05 | 5.53E+05 |
| 2.88E+07 | 2.89E+07 | 2.82E+07 | 2.62E+07 | 2.72E+07 | 2.46E+07 | 3.45E+07 | 3.76E+07 | 3.75E+07 |
| 2.75E+05 | 3.86E+05 | 3.89E+05 | 2.32E+05 | 2.36E+05 | 3.45E+05 | 3.17E+05 | 4.88E+05 | 3.77E+05 |
| 1.10E+04 | 1.33E+04 | 1.53E+04 | 8.39E+03 | 1.22E+04 | 1.56E+04 | 1.52E+04 | 2.07E+04 | 1.84E+04 |
| 5.14E+05 | 5.57E+05 | 7.26E+05 | 4.76E+05 | 4.69E+05 | 6.23E+05 | 7.18E+05 | 9.92E+05 | 7.61E+05 |
| 3.46E+05 | 3.33E+05 | 4.98E+05 | 3.51E+05 | 3.21E+05 | 3.74E+05 | 6.06E+05 | 8.64E+05 | 5.53E+05 |
| 1.21E+04 | 1.69E+04 | 2.06E+04 | 1.18E+04 | 1.02E+04 | 1.34E+04 | 1.60E+04 | 2.72E+04 | 1.87E+04 |

|          |          |          |          |          |          |          |          |          |
|----------|----------|----------|----------|----------|----------|----------|----------|----------|
| 2.72E+04 | 2.81E+04 | 2.69E+04 | 2.00E+04 | 1.96E+04 | 3.01E+04 | 2.39E+04 | 4.32E+04 | 3.27E+04 |
| 4.59E+03 | 7.78E+03 | 4.15E+03 | 5.84E+03 | 5.44E+03 | 9.24E+03 | 9.16E+03 | 1.37E+04 | 7.64E+03 |
| 1.17E+04 | 1.28E+04 | 1.35E+04 | 9.64E+03 | 8.80E+03 | 1.34E+04 | 1.33E+04 | 1.55E+04 | 1.35E+04 |
| 3.19E+04 | 3.31E+04 | 3.43E+04 | 2.39E+04 | 3.05E+04 | 3.56E+04 | 3.89E+04 | 3.69E+04 | 3.13E+04 |
| 1.94E+03 | 3.90E+03 | 2.61E+03 | 1.31E+04 | 1.48E+04 | 3.38E+03 | 9.00E+00 | 6.05E+03 | 3.87E+03 |
| 9.00E+00 | 9.00E+00 | 9.00E+00 | 9.00E+00 | 9.00E+00 | 9.00E+00 | 8.12E+02 | 1.29E+03 | 5.76E+02 |
| 1.27E+03 | 8.25E+02 | 1.83E+03 | 6.75E+02 | 9.20E+02 | 1.98E+03 | 2.80E+03 | 3.27E+03 | 9.45E+02 |
| 1.60E+03 | 2.93E+03 | 2.25E+03 | 3.44E+03 | 3.57E+03 | 2.63E+03 | 5.17E+03 | 5.07E+03 | 4.22E+03 |
| 4.02E+04 | 3.36E+04 | 5.15E+04 | 4.25E+04 | 4.23E+04 | 4.11E+04 | 4.63E+04 | 5.40E+04 | 4.56E+04 |
| 5.76E+03 | 7.31E+03 | 6.79E+03 | 6.69E+03 | 5.93E+03 | 5.67E+03 | 7.30E+03 | 8.29E+03 | 7.63E+03 |
| 9.00E+00 |
| 3.07E+04 | 3.88E+04 | 5.34E+04 | 3.21E+04 | 2.66E+04 | 4.15E+04 | 3.83E+04 | 5.88E+04 | 4.02E+04 |
| 1.30E+03 | 1.30E+03 | 2.13E+03 | 1.15E+03 | 1.42E+03 | 2.14E+03 | 1.59E+03 | 2.51E+03 | 1.86E+03 |
| 3.09E+05 | 3.38E+05 | 3.62E+05 | 2.53E+05 | 2.44E+05 | 3.03E+05 | 2.70E+05 | 3.51E+05 | 3.00E+05 |
| 2.53E+04 | 1.66E+04 | 2.45E+04 | 1.78E+04 | 1.39E+04 | 2.29E+04 | 2.21E+04 | 3.09E+04 | 2.59E+04 |
| 9.00E+00 | 1.37E+03 | 9.00E+00 | 1.51E+03 | 9.00E+00 | 9.00E+00 | 6.77E+02 | 1.45E+03 | 1.03E+03 |
| 9.00E+00 |
| 9.00E+00 | 9.00E+00 | 8.58E+02 | 9.00E+00 | 9.00E+00 | 9.00E+00 | 9.00E+00 | 9.00E+00 | 5.67E+02 |
| 9.00E+00 |
| 3.08E+04 | 1.82E+04 | 2.75E+04 | 2.48E+04 | 1.75E+04 | 2.24E+04 | 3.14E+04 | 4.07E+04 | 3.35E+04 |
| 5.19E+04 | 6.16E+04 | 6.09E+04 | 4.99E+04 | 5.02E+04 | 6.59E+04 | 4.58E+04 | 8.37E+04 | 5.11E+04 |
| 2.16E+04 | 1.88E+04 | 2.69E+04 | 2.03E+04 | 2.03E+04 | 1.96E+04 | 1.92E+04 | 3.01E+04 | 2.30E+04 |
| 9.00E+00 | 9.00E+00 | 9.00E+00 | 9.00E+00 | 6.64E+02 | 9.00E+00 | 9.00E+00 | 9.00E+00 | 9.00E+00 |
| 1.34E+03 | 9.00E+00 | 9.00E+00 | 9.00E+00 | 9.00E+00 | 9.00E+00 | 9.00E+00 | 2.73E+03 | 9.00E+00 |
| 1.10E+04 | 8.47E+03 | 1.52E+04 | 1.00E+04 | 8.44E+03 | 1.39E+04 | 1.22E+04 | 1.42E+04 | 1.01E+04 |
| 9.00E+00 | 9.00E+00 | 1.55E+03 | 9.00E+00 | 9.00E+00 | 9.00E+00 | 9.00E+00 | 7.42E+02 | 9.00E+00 |
| 1.46E+04 | 1.43E+04 | 1.18E+04 | 1.13E+04 | 1.11E+04 | 1.28E+04 | 1.42E+04 | 1.49E+04 | 1.41E+04 |
| 2.78E+05 | 2.83E+05 | 2.68E+05 | 2.41E+05 | 2.08E+05 | 2.41E+05 | 2.92E+05 | 3.34E+05 | 3.02E+05 |
| 5.28E+05 | 4.49E+05 | 5.33E+05 | 4.89E+05 | 4.86E+05 | 5.05E+05 | 4.65E+05 | 4.64E+05 | 4.60E+05 |
| 4.96E+05 | 4.23E+05 | 5.08E+05 | 4.37E+05 | 4.86E+05 | 4.93E+05 | 3.84E+05 | 5.13E+05 | 5.15E+05 |
| 1.02E+04 | 8.47E+03 | 1.05E+04 | 1.23E+04 | 8.93E+03 | 9.98E+03 | 9.91E+03 | 1.05E+04 | 7.39E+03 |
| 9.00E+00 |
| 9.05E+03 | 5.44E+03 | 7.18E+03 | 7.80E+03 | 9.94E+03 | 1.18E+04 | 7.00E+03 | 1.43E+04 | 6.93E+03 |
| 6.67E+04 | 8.16E+04 | 9.07E+04 | 9.04E+04 | 9.94E+04 | 5.81E+04 | 1.76E+05 | 2.39E+05 | 1.68E+05 |
| 3.65E+04 | 2.79E+04 | 4.36E+04 | 2.94E+04 | 3.48E+04 | 2.29E+04 | 9.65E+04 | 1.71E+05 | 7.48E+04 |
| 9.00E+00 | 1.21E+03 | 9.00E+00 | 9.00E+00 | 4.48E+03 | 9.00E+00 | 9.00E+00 | 5.67E+03 | 1.62E+03 |
| 9.07E+05 | 9.35E+05 | 1.11E+06 | 9.56E+05 | 7.54E+05 | 8.17E+05 | 2.03E+06 | 2.82E+06 | 1.55E+06 |
| 1.34E+05 | 1.09E+05 | 1.67E+05 | 1.40E+05 | 1.35E+05 | 9.10E+04 | 2.48E+05 | 3.94E+05 | 2.54E+05 |
| 3.52E+04 | 3.80E+04 | 3.30E+04 | 3.78E+04 | 4.58E+04 | 3.78E+04 | 3.58E+04 | 5.45E+04 | 4.22E+04 |
| 7.26E+05 | 5.94E+05 | 1.09E+06 | 3.86E+05 | 6.37E+05 | 3.92E+05 | 1.55E+06 | 1.90E+06 | 1.19E+06 |
| 8.20E+04 | 7.54E+04 | 9.71E+04 | 1.22E+05 | 7.62E+04 | 6.60E+04 | 1.66E+05 | 1.64E+05 | 1.33E+05 |
| 5.24E+04 | 5.38E+04 | 7.22E+04 | 6.27E+04 | 4.07E+04 | 7.76E+04 | 6.80E+04 | 6.92E+04 | 8.53E+04 |
| 1.01E+05 | 9.01E+04 | 1.57E+05 | 1.03E+05 | 9.62E+04 | 7.91E+04 | 1.90E+05 | 2.65E+05 | 2.10E+05 |
| 5.39E+03 | 5.42E+03 | 4.95E+03 | 4.53E+03 | 5.96E+03 | 3.26E+03 | 5.07E+03 | 6.31E+03 | 4.92E+03 |
| 5.64E+03 | 5.51E+03 | 6.50E+03 | 5.88E+03 | 6.34E+03 | 6.03E+03 | 5.31E+03 | 8.51E+03 | 6.76E+03 |
| 2.29E+05 | 2.37E+05 | 2.69E+05 | 2.12E+05 | 2.39E+05 | 2.00E+05 | 2.45E+05 | 2.72E+05 | 2.67E+05 |
| 6.43E+03 | 5.22E+03 | 7.85E+03 | 7.16E+03 | 4.23E+03 | 7.19E+03 | 6.59E+03 | 7.60E+03 | 6.28E+03 |
| 1.65E+04 | 1.86E+04 | 1.77E+04 | 1.61E+04 | 1.93E+04 | 1.64E+04 | 1.62E+04 | 2.06E+04 | 1.77E+04 |
| 2.12E+04 | 2.47E+04 | 2.18E+04 | 2.24E+04 | 1.86E+04 | 1.72E+04 | 2.41E+04 | 2.77E+04 | 2.22E+04 |
| 2.28E+05 | 1.59E+05 | 6.76E+04 | 1.92E+05 | 1.44E+05 | 3.54E+04 | 2.52E+05 | 2.98E+05 | 2.69E+05 |
| 3.28E+05 | 4.07E+05 | 4.07E+05 | 2.42E+05 | 3.45E+05 | 3.30E+05 | 4.35E+05 | 5.74E+05 | 4.59E+05 |
| 3.13E+05 | 7.17E+04 | 2.99E+05 | 2.52E+05 | 1.93E+05 | 2.23E+05 | 4.44E+05 | 6.45E+05 | 3.88E+05 |
| 2.45E+06 | 2.49E+06 | 3.11E+06 | 2.09E+06 | 2.61E+06 | 2.31E+06 | 4.33E+06 | 6.28E+06 | 4.24E+06 |
| 4.69E+05 | 3.37E+05 | 2.98E+05 | 3.45E+05 | 4.22E+05 | 4.33E+05 | 3.81E+05 | 4.75E+05 | 4.72E+05 |

|          |          |          |          |          |          |          |          |          |
|----------|----------|----------|----------|----------|----------|----------|----------|----------|
| 2.80E+05 | 1.80E+05 | 2.38E+05 | 1.65E+05 | 1.74E+05 | 2.04E+05 | 3.40E+05 | 4.63E+05 | 2.51E+05 |
| 4.14E+06 | 4.52E+06 | 4.28E+06 | 3.12E+06 | 3.94E+06 | 3.96E+06 | 4.20E+06 | 5.36E+06 | 4.85E+06 |
| 2.19E+04 | 3.91E+04 | 4.26E+04 | 1.73E+04 | 3.20E+04 | 3.05E+04 | 3.07E+04 | 4.69E+04 | 3.71E+04 |
| 8.56E+05 | 1.58E+05 | 2.52E+05 | 2.66E+05 | 2.59E+05 | 3.80E+05 | 5.47E+05 | 1.04E+06 | 6.43E+05 |
| 2.29E+05 | 2.60E+05 | 2.72E+05 | 2.54E+05 | 2.68E+05 | 2.33E+05 | 3.87E+05 | 5.76E+05 | 3.81E+05 |
| 2.21E+05 | 2.00E+05 | 4.05E+05 | 1.53E+05 | 1.97E+05 | 2.41E+05 | 1.09E+05 | 2.39E+05 | 2.40E+05 |
| 1.97E+06 | 1.83E+06 | 2.59E+06 | 1.80E+06 | 2.11E+06 | 1.68E+06 | 3.19E+06 | 4.97E+06 | 2.91E+06 |
| 4.72E+06 | 4.22E+06 | 4.93E+06 | 3.95E+06 | 3.94E+06 | 3.43E+06 | 4.84E+06 | 6.76E+06 | 4.74E+06 |
| 6.49E+05 | 7.13E+05 | 6.58E+05 | 5.61E+05 | 5.14E+05 | 6.95E+05 | 7.21E+05 | 8.31E+05 | 6.80E+05 |
| 1.57E+06 | 1.59E+06 | 2.12E+06 | 1.47E+06 | 1.61E+06 | 1.72E+06 | 1.80E+06 | 2.10E+06 | 1.94E+06 |
| 2.53E+03 | 2.54E+03 | 1.96E+03 | 1.85E+03 | 2.13E+03 | 2.40E+03 | 1.88E+03 | 1.93E+03 | 2.10E+03 |
| 3.46E+05 | 3.76E+05 | 3.92E+05 | 3.27E+05 | 2.78E+05 | 2.36E+05 | 5.18E+05 | 7.10E+05 | 4.14E+05 |
| 9.00E+00 | 5.77E+03 | 9.00E+00 | 9.00E+00 | 9.00E+00 | 1.15E+04 | 9.00E+00 | 9.00E+00 | 9.00E+00 |
| 2.32E+05 | 1.84E+05 | 2.57E+05 | 3.25E+05 | 2.49E+05 | 2.53E+05 | 3.39E+05 | 4.42E+05 | 3.29E+05 |
| 6.68E+04 | 1.37E+05 | 2.34E+05 | 1.34E+05 | 1.30E+05 | 7.59E+04 | 9.00E+00 | 9.00E+00 | 1.20E+05 |
| 9.99E+03 | 6.64E+03 | 1.37E+04 | 1.20E+04 | 1.10E+04 | 7.80E+03 | 1.90E+04 | 3.46E+04 | 2.33E+04 |
| 1.33E+03 | 7.13E+02 | 7.30E+03 | 9.00E+00 | 2.67E+03 | 4.06E+03 | 6.80E+02 | 2.68E+03 | 2.00E+03 |
| 2.38E+05 | 1.82E+05 | 3.40E+05 | 2.60E+05 | 2.37E+05 | 2.16E+05 | 3.62E+05 | 5.26E+05 | 3.80E+05 |
| 6.60E+06 | 6.19E+06 | 7.48E+06 | 5.93E+06 | 5.96E+06 | 5.79E+06 | 7.34E+06 | 9.76E+06 | 6.72E+06 |
| 1.83E+04 | 1.41E+04 | 2.23E+04 | 1.65E+04 | 1.67E+04 | 1.62E+04 | 9.00E+00 | 9.00E+00 | 9.00E+00 |
| 7.00E+06 | 6.86E+06 | 8.00E+06 | 6.94E+06 | 3.87E+06 | 6.23E+06 | 8.42E+06 | 4.74E+06 | 7.95E+06 |
| 4.04E+06 | 4.26E+06 | 5.49E+06 | 4.21E+06 | 4.58E+06 | 4.14E+06 | 5.31E+06 | 6.87E+06 | 6.13E+06 |
| 1.74E+05 | 1.34E+05 | 2.35E+05 | 2.62E+05 | 1.91E+05 | 2.08E+05 | 2.64E+05 | 3.41E+05 | 3.19E+05 |
| 3.40E+05 | 3.14E+05 | 4.58E+05 | 3.58E+05 | 3.08E+05 | 3.55E+05 | 6.90E+05 | 9.74E+05 | 5.29E+05 |
| 6.15E+06 | 5.72E+06 | 6.77E+06 | 6.32E+06 | 5.14E+06 | 5.42E+06 | 6.58E+06 | 8.48E+06 | 7.24E+06 |
| 5.30E+04 | 5.39E+04 | 5.71E+04 | 7.10E+04 | 6.77E+04 | 4.65E+04 | 5.98E+04 | 9.78E+04 | 6.11E+04 |
| 4.13E+06 | 3.51E+06 | 5.25E+06 | 3.48E+06 | 4.01E+06 | 3.34E+06 | 5.86E+06 | 8.75E+06 | 4.98E+06 |
| 2.04E+04 | 3.05E+04 | 3.45E+04 | 1.86E+04 | 2.66E+04 | 2.44E+04 | 9.00E+00 | 5.00E+04 | 9.00E+00 |
| 3.06E+04 | 1.58E+04 | 3.21E+04 | 3.38E+04 | 2.21E+04 | 2.53E+04 | 3.16E+04 | 9.28E+04 | 1.37E+04 |
| 2.25E+05 | 3.76E+05 | 4.78E+05 | 2.52E+05 | 2.89E+05 | 4.19E+05 | 3.27E+05 | 4.40E+05 | 2.94E+05 |
| 9.00E+00 | 2.93E+04 | 9.00E+00 | 1.29E+04 | 9.00E+00 | 9.00E+00 | 2.86E+04 | 5.45E+04 | 1.18E+04 |
| 5.67E+05 | 6.46E+05 | 5.73E+05 | 5.34E+05 | 6.25E+05 | 5.66E+05 | 6.25E+05 | 7.58E+05 | 6.56E+05 |
| 7.02E+03 | 7.59E+03 | 9.22E+03 | 7.05E+03 | 6.86E+03 | 5.45E+03 | 1.88E+04 | 2.51E+04 | 1.43E+04 |
| 1.36E+04 | 1.37E+04 | 1.74E+04 | 1.44E+04 | 1.76E+04 | 1.22E+04 | 2.74E+04 | 4.10E+04 | 2.22E+04 |
| 3.21E+03 | 3.41E+03 | 7.84E+03 | 5.48E+03 | 5.34E+03 | 4.64E+03 | 1.07E+04 | 1.16E+04 | 8.60E+03 |
| 6.15E+04 | 6.15E+04 | 7.73E+04 | 6.04E+04 | 4.79E+04 | 6.01E+04 | 7.70E+04 | 1.22E+05 | 7.28E+04 |
| 1.92E+04 | 1.31E+04 | 2.58E+04 | 1.41E+04 | 1.77E+04 | 1.54E+04 | 3.84E+04 | 5.35E+04 | 4.34E+04 |
| 7.60E+05 | 7.64E+05 | 7.70E+05 | 7.87E+05 | 6.82E+05 | 7.79E+05 | 6.97E+05 | 7.53E+05 | 7.54E+05 |
| 4.46E+03 | 5.69E+03 | 8.19E+03 | 4.87E+03 | 4.47E+03 | 5.24E+03 | 6.89E+03 | 8.02E+03 | 6.50E+03 |
| 8.53E+05 | 1.07E+06 | 1.26E+06 | 8.27E+05 | 1.28E+06 | 1.10E+06 | 1.17E+06 | 1.62E+06 | 1.18E+06 |
| 8.56E+03 | 7.82E+03 | 1.82E+04 | 9.00E+00 | 7.88E+03 | 1.10E+04 | 1.07E+04 | 1.03E+04 | 9.00E+00 |
| 9.85E+03 | 8.38E+03 | 8.37E+03 | 1.12E+04 | 8.83E+03 | 7.60E+03 | 1.06E+04 | 9.83E+03 | 9.41E+03 |
| 1.10E+05 | 1.22E+05 | 1.23E+05 | 1.06E+05 | 1.18E+05 | 1.14E+05 | 1.14E+05 | 1.22E+05 | 1.12E+05 |
| 1.25E+05 | 1.17E+05 | 1.58E+05 | 5.76E+04 | 8.06E+04 | 8.53E+04 | 7.11E+04 | 1.34E+05 | 6.79E+04 |
| 5.93E+03 | 8.36E+03 | 1.07E+04 | 5.01E+03 | 4.56E+03 | 6.80E+03 | 7.77E+03 | 7.29E+03 | 2.30E+03 |
| 1.10E+05 | 1.67E+05 | 1.94E+05 | 7.09E+04 | 1.47E+05 | 1.77E+05 | 8.58E+04 | 2.14E+05 | 9.78E+04 |
| 9.60E+04 | 1.07E+05 | 2.47E+05 | 1.04E+05 | 1.96E+05 | 1.64E+05 | 1.45E+05 | 2.75E+05 | 1.68E+05 |
| 2.30E+05 | 3.88E+05 | 4.12E+05 | 2.84E+05 | 2.84E+05 | 3.63E+05 | 4.55E+05 | 6.08E+05 | 4.43E+05 |
| 1.02E+04 | 8.73E+03 | 2.07E+04 | 1.19E+04 | 1.58E+04 | 8.42E+03 | 1.76E+04 | 2.06E+04 | 1.19E+04 |
| 4.78E+03 | 2.10E+04 | 1.80E+04 | 6.56E+03 | 1.65E+04 | 1.68E+04 | 2.88E+04 | 1.44E+04 | 2.43E+04 |
| 1.50E+04 | 7.70E+03 | 1.38E+04 | 1.20E+04 | 2.23E+04 | 1.14E+04 | 9.57E+03 | 1.57E+04 | 1.21E+04 |
| 1.18E+06 | 1.41E+06 | 1.56E+06 | 1.35E+06 | 1.27E+06 | 1.26E+06 | 1.25E+06 | 1.54E+06 | 1.43E+06 |
| 1.46E+05 | 2.74E+05 | 1.28E+05 | 1.74E+05 | 2.67E+05 | 2.35E+05 | 9.00E+00 | 9.00E+00 | 9.00E+00 |
| 1.84E+05 | 2.01E+05 | 2.88E+05 | 2.15E+05 | 2.63E+05 | 2.13E+05 | 2.24E+05 | 2.17E+05 | 2.49E+05 |



|          |          |          |          |          |          |          |          |          |
|----------|----------|----------|----------|----------|----------|----------|----------|----------|
| 1.16E+06 | 1.14E+06 | 1.51E+06 | 1.28E+06 | 1.28E+06 | 1.37E+06 | 1.22E+06 | 1.21E+06 | 1.30E+06 |
| 9.00E+00 | 9.00E+00 | 9.00E+00 | 9.00E+00 | 9.00E+00 | 9.00E+00 | 2.54E+04 | 3.32E+04 | 5.76E+04 |
| 1.61E+04 | 2.70E+04 | 3.14E+04 | 2.23E+04 | 2.20E+04 | 2.12E+04 | 2.58E+04 | 1.58E+04 | 2.39E+04 |
| 9.87E+03 | 9.83E+03 | 9.09E+03 | 1.38E+04 | 1.01E+04 | 7.70E+03 | 1.16E+04 | 1.49E+04 | 1.19E+04 |
| 9.46E+04 | 9.79E+04 | 1.28E+05 | 1.23E+05 | 1.23E+05 | 9.05E+04 | 1.11E+05 | 1.81E+05 | 1.52E+05 |
| 8.26E+03 | 7.02E+03 | 1.07E+04 | 3.95E+03 | 1.03E+04 | 9.00E+00 | 1.12E+04 | 9.00E+00 | 7.11E+03 |
| 9.21E+03 | 1.48E+04 | 1.43E+04 | 1.51E+04 | 1.05E+04 | 7.42E+03 | 1.27E+04 | 2.90E+04 | 2.39E+04 |
| 9.00E+00 | 9.00E+00 | 9.00E+00 | 9.00E+00 | 9.00E+00 | 2.65E+03 | 9.00E+00 | 9.00E+00 | 6.69E+02 |
| 1.55E+04 | 1.63E+04 | 1.87E+04 | 1.36E+04 | 1.28E+04 | 1.29E+04 | 1.68E+04 | 1.96E+04 | 1.75E+04 |
| 6.67E+03 | 1.20E+04 | 1.66E+04 | 1.06E+04 | 1.93E+03 | 1.26E+04 | 4.04E+03 | 1.33E+04 | 1.27E+04 |
| 4.39E+07 | 5.11E+07 | 6.90E+07 | 4.75E+07 | 4.86E+07 | 5.81E+07 | 4.64E+07 | 5.99E+07 | 5.01E+07 |
| 4.14E+05 | 5.31E+05 | 4.94E+05 | 5.40E+05 | 4.46E+05 | 4.68E+05 | 3.48E+05 | 4.94E+05 | 3.90E+05 |
| 6.55E+03 | 8.30E+03 | 2.41E+04 | 1.77E+04 | 7.85E+03 | 8.90E+03 | 9.45E+03 | 6.84E+03 | 1.35E+04 |
| 9.72E+05 | 9.75E+05 | 1.15E+06 | 9.47E+05 | 9.64E+05 | 9.78E+05 | 9.97E+05 | 1.61E+06 | 1.16E+06 |
| 7.31E+04 | 5.23E+04 | 1.27E+05 | 6.54E+04 | 6.50E+04 | 8.46E+04 | 6.53E+04 | 5.69E+04 | 7.23E+04 |
| 9.63E+05 | 1.02E+06 | 1.71E+06 | 1.20E+06 | 1.11E+06 | 1.20E+06 | 9.87E+05 | 1.26E+06 | 1.05E+06 |
| 9.00E+00 |
| 1.93E+05 | 2.07E+05 | 2.17E+05 | 2.19E+05 | 2.09E+05 | 2.15E+05 | 2.30E+05 | 3.27E+05 | 2.65E+05 |
| 1.93E+04 | 3.25E+04 | 2.77E+04 | 2.01E+04 | 4.48E+04 | 2.40E+04 | 2.17E+04 | 4.79E+04 | 2.47E+04 |
| 4.02E+06 | 2.93E+06 | 4.76E+06 | 2.88E+06 | 3.75E+06 | 2.80E+06 | 4.57E+06 | 6.39E+06 | 4.13E+06 |
| 2.44E+05 | 2.60E+05 | 3.39E+05 | 3.90E+05 | 2.95E+05 | 2.61E+05 | 1.83E+05 | 2.47E+05 | 2.76E+05 |
| 2.41E+05 | 2.49E+05 | 3.47E+05 | 1.05E+05 | 3.08E+05 | 2.61E+05 | 3.17E+05 | 3.91E+05 | 3.46E+05 |
| 3.88E+05 | 4.12E+05 | 4.74E+05 | 6.00E+05 | 4.51E+05 | 4.38E+05 | 4.60E+05 | 5.70E+05 | 4.64E+05 |
| 1.41E+06 | 1.15E+06 | 1.73E+06 | 1.42E+06 | 1.21E+06 | 1.20E+06 | 1.74E+06 | 2.32E+06 | 1.48E+06 |
| 8.54E+05 | 1.07E+06 | 1.57E+06 | 1.11E+06 | 1.13E+06 | 1.25E+06 | 8.79E+05 | 1.17E+06 | 1.07E+06 |
| 5.54E+05 | 5.82E+05 | 6.59E+05 | 5.95E+05 | 6.84E+05 | 6.97E+05 | 5.95E+05 | 7.50E+05 | 6.62E+05 |
| 7.57E+07 | 8.44E+07 | 8.13E+07 | 7.91E+07 | 8.56E+07 | 6.31E+07 | 8.01E+07 | 9.00E+07 | 8.03E+07 |
| 3.44E+06 | 3.56E+06 | 3.66E+06 | 3.49E+06 | 3.85E+06 | 3.44E+06 | 4.15E+06 | 4.10E+06 | 3.68E+06 |
| 6.04E+05 | 8.82E+05 | 1.19E+06 | 5.54E+05 | 9.20E+05 | 8.75E+05 | 9.03E+05 | 1.19E+06 | 1.09E+06 |
| 6.61E+06 | 5.32E+06 | 6.03E+06 | 7.68E+06 | 5.04E+06 | 4.94E+06 | 5.55E+06 | 9.41E+06 | 7.01E+06 |
| 4.68E+08 | 4.89E+08 | 4.74E+08 | 4.44E+08 | 4.52E+08 | 4.52E+08 | 4.34E+08 | 4.71E+08 | 4.68E+08 |
| 3.03E+07 | 2.97E+07 | 3.13E+07 | 2.66E+07 | 2.69E+07 | 2.73E+07 | 3.05E+07 | 3.23E+07 | 2.84E+07 |
| 2.78E+06 | 2.96E+06 | 2.81E+06 | 3.18E+06 | 3.30E+06 | 3.27E+06 | 2.96E+06 | 3.40E+06 | 2.59E+06 |
| 4.56E+06 | 6.00E+06 | 6.21E+06 | 6.34E+06 | 6.70E+06 | 7.91E+06 | 4.97E+06 | 6.34E+06 | 4.48E+06 |
| 3.29E+06 | 4.19E+06 | 5.28E+06 | 4.46E+06 | 1.22E+06 | 4.48E+06 | 4.48E+06 | 6.10E+06 | 4.75E+06 |
| 7.08E+05 | 6.83E+05 | 6.41E+05 | 7.56E+05 | 7.82E+05 | 6.89E+05 | 6.77E+05 | 6.41E+05 | 6.86E+05 |
| 2.36E+06 | 3.13E+06 | 2.68E+06 | 2.99E+06 | 3.24E+06 | 2.72E+06 | 2.64E+06 | 2.85E+06 | 2.84E+06 |
| 8.09E+06 | 8.02E+06 | 8.36E+06 | 1.26E+07 | 1.24E+07 | 1.08E+07 | 1.26E+07 | 1.39E+07 | 1.08E+07 |
| 1.66E+06 | 2.14E+06 | 2.27E+06 | 1.83E+06 | 1.77E+06 | 1.95E+06 | 6.17E+05 | 2.02E+06 | 6.24E+05 |
| 6.47E+04 | 4.76E+04 | 8.95E+04 | 5.41E+04 | 5.76E+04 | 6.05E+04 | 1.00E+05 | 1.74E+05 | 9.51E+04 |
| 1.39E+05 | 1.24E+05 | 1.65E+05 | 1.29E+05 | 1.35E+05 | 1.30E+05 | 1.86E+05 | 2.20E+05 | 1.78E+05 |
| 3.82E+06 | 3.53E+06 | 3.75E+06 | 3.45E+06 | 3.54E+06 | 3.65E+06 | 4.12E+06 | 4.15E+06 | 3.41E+06 |
| 8.52E+06 | 8.25E+06 | 1.08E+07 | 8.14E+06 | 9.79E+06 | 7.78E+06 | 7.80E+06 | 8.47E+06 | 8.11E+06 |
| 2.94E+05 | 2.70E+05 | 5.30E+05 | 3.46E+05 | 3.15E+05 | 3.89E+05 | 7.37E+05 | 1.20E+06 | 7.16E+05 |
| 2.11E+03 | 1.77E+03 | 2.89E+03 | 2.01E+03 | 2.40E+03 | 1.62E+03 | 7.00E+03 | 1.01E+04 | 5.96E+03 |
| 7.16E+04 | 8.90E+04 | 8.58E+04 | 8.30E+04 | 9.05E+04 | 8.27E+04 | 1.15E+05 | 7.39E+04 | 1.08E+05 |
| 1.32E+05 | 1.74E+05 | 1.25E+05 | 9.00E+04 | 1.40E+05 | 5.38E+04 | 1.96E+05 | 1.98E+05 | 8.44E+04 |
| 5.31E+05 | 5.33E+05 | 6.41E+05 | 5.00E+05 | 5.59E+05 | 5.77E+05 | 5.29E+05 | 5.50E+05 | 5.65E+05 |
| 2.26E+04 | 8.05E+04 | 5.71E+04 | 3.94E+04 | 5.92E+04 | 5.82E+04 | 4.61E+04 | 4.98E+04 | 5.22E+04 |
| 9.00E+00 | 9.00E+00 | 9.00E+00 | 9.00E+00 | 1.36E+03 | 9.00E+00 | 1.12E+03 | 9.00E+00 | 9.00E+00 |
| 9.00E+00 | 9.00E+00 | 7.25E+03 | 9.00E+00 | 9.00E+00 | 9.00E+00 | 3.73E+03 | 1.74E+03 | 3.65E+03 |
| 6.87E+06 | 6.66E+06 | 8.79E+06 | 8.83E+06 | 8.23E+06 | 7.02E+06 | 7.94E+06 | 8.93E+06 | 7.71E+06 |
| 2.57E+05 | 2.78E+05 | 5.00E+05 | 3.13E+05 | 3.26E+05 | 2.81E+05 | 3.65E+05 | 4.56E+05 | 3.69E+05 |
| 1.22E+05 | 1.42E+05 | 1.41E+05 | 9.72E+04 | 1.30E+05 | 1.33E+05 | 3.27E+04 | 1.29E+05 | 1.50E+05 |

|          |          |          |          |          |          |          |          |          |
|----------|----------|----------|----------|----------|----------|----------|----------|----------|
| 9.13E+05 | 1.11E+06 | 1.67E+06 | 1.19E+06 | 1.14E+06 | 1.07E+06 | 1.34E+06 | 1.38E+06 | 1.31E+06 |
| 5.12E+04 | 1.12E+05 | 1.56E+05 | 1.15E+05 | 1.36E+05 | 1.22E+05 | 5.33E+04 | 6.62E+04 | 5.84E+04 |
| 9.00E+00 | 8.18E+04 | 8.71E+04 | 9.00E+00 | 9.00E+00 | 9.00E+00 | 7.38E+04 | 9.00E+00 | 9.00E+00 |
| 2.30E+03 | 5.87E+03 | 7.70E+03 | 3.56E+03 | 2.25E+03 | 6.47E+03 | 9.00E+00 | 6.67E+03 | 9.00E+00 |
| 9.00E+00 |
| 1.76E+05 | 2.42E+05 | 5.06E+05 | 3.34E+05 | 3.61E+05 | 1.91E+05 | 1.14E+05 | 8.95E+04 | 3.07E+05 |
| 1.09E+06 | 1.04E+06 | 1.38E+06 | 1.16E+06 | 1.25E+06 | 1.14E+06 | 1.41E+06 | 1.61E+06 | 1.55E+06 |
| 9.90E+04 | 1.47E+05 | 1.19E+05 | 9.30E+04 | 9.99E+04 | 8.91E+04 | 1.45E+05 | 1.17E+05 | 9.62E+04 |
| 1.02E+08 | 9.31E+07 | 1.09E+08 | 9.67E+07 | 1.05E+08 | 8.80E+07 | 1.00E+08 | 1.21E+08 | 1.13E+08 |
| 4.68E+05 | 4.78E+05 | 4.83E+05 | 4.40E+05 | 4.57E+05 | 3.98E+05 | 4.29E+05 | 5.14E+05 | 4.72E+05 |
| 1.72E+07 | 1.82E+07 | 1.84E+07 | 1.53E+07 | 1.62E+07 | 1.38E+07 | 1.98E+07 | 1.92E+07 | 1.99E+07 |
| 1.32E+06 | 7.64E+05 | 1.60E+06 | 8.96E+05 | 1.23E+06 | 1.66E+06 | 1.76E+06 | 1.52E+06 | 1.40E+06 |
| 4.45E+06 | 5.91E+06 | 7.09E+06 | 3.72E+06 | 4.74E+06 | 4.83E+06 | 4.44E+06 | 7.92E+06 | 5.43E+06 |
| 7.40E+05 | 8.83E+05 | 8.94E+05 | 6.34E+05 | 8.71E+05 | 8.25E+05 | 9.52E+05 | 1.06E+06 | 9.96E+05 |
| 9.59E+06 | 1.04E+07 | 1.12E+07 | 8.98E+06 | 9.34E+06 | 9.44E+06 | 1.07E+07 | 1.05E+07 | 9.79E+06 |
| 2.26E+04 | 2.44E+04 | 3.46E+04 | 2.06E+04 | 2.42E+04 | 1.98E+04 | 3.56E+04 | 5.55E+04 | 3.45E+04 |
| 1.42E+06 | 1.63E+06 | 1.62E+06 | 1.50E+06 | 1.55E+06 | 1.39E+06 | 1.53E+06 | 1.65E+06 | 1.68E+06 |
| 9.44E+04 | 8.51E+04 | 1.12E+05 | 3.13E+04 | 8.30E+04 | 2.70E+04 | 8.94E+04 | 3.80E+04 | 6.71E+04 |
| 4.05E+06 | 3.96E+06 | 4.19E+06 | 4.00E+06 | 4.27E+06 | 3.84E+06 | 4.14E+06 | 3.98E+06 | 3.54E+06 |
| 2.60E+05 | 2.79E+05 | 4.31E+05 | 2.70E+05 | 2.79E+05 | 2.70E+05 | 7.21E+05 | 1.02E+06 | 6.41E+05 |
| 7.57E+04 | 7.44E+04 | 7.78E+04 | 6.88E+04 | 7.45E+04 | 5.63E+04 | 7.12E+04 | 7.62E+04 | 6.41E+04 |
| 1.00E+07 | 9.48E+06 | 1.22E+07 | 1.09E+07 | 1.13E+07 | 9.02E+06 | 1.18E+07 | 1.23E+07 | 1.14E+07 |
| 1.65E+05 | 3.85E+05 | 4.12E+05 | 4.47E+05 | 5.44E+05 | 2.96E+05 | 2.00E+05 | 4.36E+05 | 2.35E+05 |
| 3.74E+05 | 4.19E+05 | 4.56E+05 | 4.10E+05 | 3.95E+05 | 3.83E+05 | 4.71E+05 | 4.63E+05 | 4.27E+05 |
| 3.32E+04 | 5.80E+04 | 4.16E+04 | 5.89E+04 | 4.99E+04 | 9.01E+03 | 9.00E+00 | 9.00E+00 | 6.15E+04 |
| 1.33E+05 | 1.14E+05 | 1.87E+05 | 1.32E+05 | 1.36E+05 | 9.97E+04 | 2.01E+05 | 2.59E+05 | 1.71E+05 |
| 9.51E+05 | 9.98E+05 | 1.35E+06 | 9.87E+05 | 1.02E+06 | 9.50E+05 | 1.17E+06 | 1.37E+06 | 1.19E+06 |
| 3.53E+06 | 3.55E+06 | 2.86E+06 | 3.91E+06 | 3.61E+06 | 2.82E+06 | 3.66E+06 | 3.38E+06 | 3.05E+06 |
| 1.01E+04 | 3.04E+04 | 1.87E+04 | 3.06E+04 | 1.26E+04 | 2.69E+04 | 2.42E+04 | 2.73E+04 | 2.11E+04 |
| 3.01E+05 | 2.57E+05 | 5.04E+05 | 3.46E+05 | 3.18E+05 | 3.48E+05 | 8.95E+05 | 1.08E+06 | 7.17E+05 |
| 2.94E+05 | 2.22E+05 | 3.83E+05 | 2.81E+05 | 2.69E+05 | 2.30E+05 | 4.30E+05 | 4.54E+05 | 3.01E+05 |
| 4.90E+04 | 1.11E+05 | 1.29E+05 | 1.21E+05 | 9.25E+04 | 8.50E+04 | 8.12E+04 | 1.20E+05 | 8.49E+04 |
| 1.30E+06 | 1.83E+06 | 1.71E+06 | 1.66E+06 | 1.55E+06 | 1.66E+06 | 1.43E+06 | 1.60E+06 | 1.72E+06 |
| 1.48E+05 | 1.93E+05 | 1.89E+05 | 1.41E+05 | 1.64E+05 | 9.80E+04 | 3.56E+05 | 4.75E+05 | 3.31E+05 |
| 7.89E+04 | 1.62E+05 | 1.28E+05 | 1.09E+05 | 1.41E+05 | 1.32E+05 | 1.06E+05 | 1.06E+05 | 7.97E+04 |
| 1.60E+03 | 4.40E+03 | 4.80E+03 | 5.17E+03 | 2.80E+03 | 6.81E+03 | 4.38E+03 | 9.00E+00 | 9.00E+00 |
| 3.19E+03 | 1.14E+04 | 1.08E+04 | 9.96E+03 | 1.33E+04 | 1.50E+04 | 9.52E+03 | 9.00E+00 | 9.00E+00 |
| 2.46E+04 | 4.64E+04 | 6.73E+04 | 2.62E+04 | 2.95E+04 | 5.57E+04 | 3.69E+04 | 4.62E+04 | 3.88E+04 |
| 6.88E+03 | 1.36E+04 | 9.87E+03 | 8.83E+03 | 1.39E+04 | 1.89E+04 | 9.00E+00 | 9.00E+00 | 9.00E+00 |
| 3.61E+05 | 4.30E+05 | 3.70E+05 | 4.64E+05 | 5.63E+05 | 4.75E+05 | 3.27E+05 | 3.33E+05 | 3.28E+05 |
| 1.24E+03 | 3.42E+03 | 7.81E+03 | 9.87E+02 | 2.91E+03 | 4.85E+03 | 9.00E+00 | 9.00E+00 | 9.00E+00 |
| 2.73E+03 | 1.03E+04 | 1.51E+04 | 4.46E+03 | 1.03E+04 | 1.25E+04 | 1.27E+04 | 1.39E+04 | 9.06E+03 |
| 2.84E+03 | 1.77E+04 | 6.05E+03 | 1.41E+04 | 1.01E+04 | 1.24E+04 | 9.00E+00 | 2.00E+03 | 1.12E+04 |
| 1.20E+05 | 1.63E+05 | 1.85E+05 | 1.75E+05 | 2.06E+05 | 1.81E+05 | 1.39E+05 | 1.45E+05 | 1.13E+05 |
| 9.00E+00 | 5.93E+03 | 9.00E+00 | 9.00E+00 | 9.00E+00 | 9.00E+00 | 8.51E+03 | 8.34E+03 | 1.97E+04 |
| 6.51E+06 | 5.89E+06 | 9.68E+06 | 7.07E+06 | 6.76E+06 | 6.24E+06 | 9.88E+06 | 1.24E+07 | 7.94E+06 |
| 5.19E+05 | 8.70E+05 | 1.03E+06 | 8.66E+05 | 8.09E+05 | 8.39E+05 | 8.13E+05 | 1.19E+06 | 8.80E+05 |
| 2.56E+06 | 3.15E+06 | 3.81E+06 | 2.82E+06 | 2.70E+06 | 2.88E+06 | 3.33E+06 | 3.42E+06 | 2.97E+06 |
| 3.51E+04 | 3.86E+04 | 4.03E+04 | 3.65E+04 | 3.08E+04 | 3.32E+04 | 2.58E+04 | 2.55E+04 | 3.71E+04 |
| 1.12E+06 | 1.59E+06 | 2.27E+06 | 1.24E+06 | 1.22E+06 | 1.89E+06 | 1.41E+06 | 1.76E+06 | 1.42E+06 |
| 1.91E+04 | 3.65E+04 | 4.38E+04 | 3.06E+04 | 4.35E+04 | 3.20E+04 | 2.98E+04 | 3.08E+04 | 2.63E+04 |
| 9.00E+00 | 9.00E+00 | 1.69E+04 | 9.00E+00 | 9.00E+00 | 9.00E+00 | 1.33E+04 | 1.92E+04 | 1.29E+04 |
| 1.50E+05 | 1.59E+05 | 1.45E+05 | 1.59E+05 | 1.29E+05 | 1.09E+05 | 1.61E+05 | 1.77E+05 | 1.42E+05 |
| 6.69E+06 | 6.48E+06 | 8.00E+06 | 6.93E+06 | 7.35E+06 | 6.80E+06 | 7.79E+06 | 7.35E+06 | 7.29E+06 |

|          |          |          |          |          |          |          |          |          |
|----------|----------|----------|----------|----------|----------|----------|----------|----------|
| 8.57E+04 | 7.98E+04 | 8.72E+04 | 7.93E+04 | 2.30E+04 | 7.04E+04 | 7.13E+04 | 3.52E+04 | 7.70E+04 |
| 1.00E+05 | 4.19E+04 | 4.91E+04 | 1.02E+05 | 5.06E+04 | 1.07E+05 | 4.35E+04 | 4.19E+04 | 6.56E+04 |
| 6.78E+06 | 7.09E+06 | 2.10E+06 | 7.10E+06 | 1.75E+06 | 6.34E+06 | 6.10E+06 | 6.34E+06 | 5.74E+06 |
| 1.16E+05 | 1.17E+05 | 2.07E+05 | 1.98E+05 | 1.99E+05 | 1.22E+05 | 1.94E+05 | 1.90E+05 | 2.02E+05 |
| 3.38E+04 | 4.53E+04 | 3.29E+04 | 6.01E+04 | 3.27E+04 | 4.40E+04 | 4.58E+04 | 4.68E+04 | 4.08E+04 |
| 6.08E+06 | 5.03E+06 | 6.71E+06 | 5.06E+06 | 4.93E+06 | 4.58E+06 | 6.37E+06 | 7.28E+06 | 5.58E+06 |
| 1.45E+05 | 3.43E+05 | 3.14E+05 | 1.43E+05 | 3.84E+05 | 2.76E+05 | 2.89E+05 | 3.96E+05 | 3.66E+05 |
| 2.11E+07 | 2.13E+07 | 3.02E+07 | 2.25E+07 | 2.20E+07 | 2.18E+07 | 2.41E+07 | 2.54E+07 | 2.59E+07 |
| 2.91E+05 | 3.56E+05 | 3.47E+05 | 4.24E+05 | 2.89E+05 | 2.90E+05 | 3.15E+05 | 3.78E+05 | 2.90E+05 |
| 9.00E+00 | 9.00E+00 | 9.00E+00 | 8.80E+03 | 1.04E+04 | 9.00E+00 | 1.19E+04 | 1.37E+04 | 1.81E+04 |
| 9.07E+05 | 1.02E+06 | 8.60E+05 | 1.17E+06 | 8.79E+05 | 8.59E+05 | 8.75E+05 | 8.67E+05 | 9.68E+05 |
| 3.34E+04 | 7.04E+04 | 6.66E+04 | 3.37E+04 | 2.25E+04 | 5.85E+04 | 4.17E+04 | 4.24E+04 | 3.70E+04 |
| 1.93E+06 | 2.19E+06 | 1.92E+06 | 1.80E+06 | 1.82E+06 | 1.76E+06 | 1.89E+06 | 2.02E+06 | 1.72E+06 |
| 1.41E+05 | 1.57E+05 | 1.48E+05 | 1.26E+05 | 1.43E+05 | 1.51E+05 | 1.66E+05 | 1.36E+05 | 1.27E+05 |
| 1.19E+07 | 1.30E+07 | 2.16E+07 | 1.54E+07 | 1.40E+07 | 1.40E+07 | 1.63E+07 | 1.41E+07 | 1.46E+07 |
| 1.97E+04 | 1.85E+04 | 2.62E+04 | 3.32E+04 | 2.06E+04 | 2.08E+04 | 9.51E+04 | 1.13E+05 | 1.02E+05 |
| 1.67E+05 | 1.65E+05 | 2.45E+05 | 1.97E+05 | 1.59E+05 | 1.69E+05 | 6.11E+05 | 8.25E+05 | 6.12E+05 |
| 1.53E+04 | 1.97E+04 | 2.44E+04 | 1.81E+04 | 1.54E+04 | 1.43E+04 | 3.71E+04 | 3.91E+04 | 3.83E+04 |
| 3.75E+05 | 3.76E+05 | 5.19E+05 | 4.68E+05 | 4.03E+05 | 3.46E+05 | 1.12E+06 | 1.56E+06 | 9.66E+05 |
| 1.16E+05 | 1.97E+05 | 2.58E+05 | 1.41E+05 | 1.51E+05 | 1.22E+05 | 2.29E+05 | 2.14E+05 | 2.59E+05 |
| 2.66E+05 | 3.41E+05 | 3.43E+05 | 2.59E+05 | 3.06E+05 | 3.28E+05 | 2.98E+05 | 4.96E+05 | 3.24E+05 |
| 1.33E+05 | 2.46E+05 | 2.52E+05 | 1.22E+05 | 1.04E+05 | 1.87E+05 | 1.07E+05 | 1.39E+05 | 1.16E+05 |
| 8.45E+06 | 1.05E+07 | 9.71E+06 | 8.25E+06 | 8.45E+06 | 8.76E+06 | 9.39E+06 | 1.23E+07 | 1.08E+07 |
| 2.62E+06 | 3.28E+06 | 3.66E+06 | 2.41E+06 | 2.61E+06 | 2.82E+06 | 2.90E+06 | 3.92E+06 | 3.42E+06 |
| 2.79E+06 | 2.85E+06 | 3.33E+06 | 2.94E+06 | 2.96E+06 | 3.04E+06 | 3.68E+06 | 4.25E+06 | 3.53E+06 |
| 1.34E+07 | 1.51E+07 | 1.87E+07 | 1.57E+07 | 1.47E+07 | 1.31E+07 | 1.69E+07 | 1.98E+07 | 1.78E+07 |
| 3.31E+05 | 3.18E+05 | 4.46E+05 | 3.55E+05 | 3.67E+05 | 3.02E+05 | 5.90E+05 | 9.51E+05 | 5.53E+05 |
| 6.13E+04 | 7.79E+04 | 3.78E+04 | 2.48E+04 | 7.74E+04 | 8.52E+04 | 1.05E+05 | 1.53E+05 | 4.23E+04 |
| 1.26E+06 | 1.27E+06 | 1.27E+06 | 9.07E+05 | 1.57E+06 | 1.08E+06 | 1.29E+06 | 2.13E+06 | 1.40E+06 |
| 1.15E+07 | 1.93E+07 | 1.42E+07 | 1.15E+07 | 1.24E+07 | 1.19E+07 | 1.22E+07 | 1.33E+07 | 1.29E+07 |
| 2.24E+05 | 3.81E+05 | 4.19E+05 | 2.37E+05 | 2.78E+05 | 3.45E+05 | 2.92E+05 | 3.13E+05 | 3.02E+05 |
| 1.57E+07 | 1.61E+07 | 1.48E+07 | 1.42E+07 | 1.40E+07 | 1.25E+07 | 1.39E+07 | 1.56E+07 | 1.54E+07 |
| 1.50E+07 | 1.68E+07 | 1.66E+07 | 1.42E+07 | 1.53E+07 | 1.35E+07 | 1.64E+07 | 2.42E+07 | 1.93E+07 |
| 3.75E+04 | 9.00E+00 | 1.02E+05 | 2.79E+04 | 9.58E+04 | 3.86E+04 | 9.00E+00 | 9.00E+00 | 4.92E+04 |
| 3.73E+06 | 4.10E+06 | 4.95E+06 | 3.71E+06 | 3.64E+06 | 3.61E+06 | 5.55E+06 | 7.06E+06 | 6.01E+06 |
| 1.45E+08 | 1.59E+08 | 1.62E+08 | 1.59E+08 | 1.43E+08 | 1.46E+08 | 1.90E+08 | 2.17E+08 | 1.86E+08 |
| 2.54E+05 | 3.44E+05 | 4.41E+05 | 3.28E+05 | 3.37E+05 | 2.70E+05 | 3.15E+05 | 5.75E+05 | 3.04E+05 |
| 4.63E+06 | 6.49E+06 | 7.46E+06 | 6.16E+06 | 6.30E+06 | 5.54E+06 | 5.85E+06 | 6.28E+06 | 7.17E+06 |
| 2.76E+05 | 2.53E+05 | 3.21E+05 | 2.76E+05 | 2.35E+05 | 2.60E+05 | 6.15E+05 | 8.53E+05 | 5.11E+05 |
| 1.16E+05 | 1.44E+05 | 1.83E+05 | 1.18E+05 | 4.65E+05 | 2.00E+05 | 2.25E+05 | 3.84E+05 | 1.55E+05 |
| 6.45E+06 | 7.00E+06 | 6.27E+06 | 6.75E+06 | 7.07E+06 | 6.01E+06 | 8.17E+06 | 7.72E+06 | 6.89E+06 |
| 6.93E+04 | 8.71E+04 | 1.32E+05 | 6.74E+04 | 8.36E+04 | 7.67E+04 | 2.76E+05 | 3.37E+05 | 2.50E+05 |
| 2.74E+07 | 2.93E+07 | 2.83E+07 | 3.03E+07 | 2.62E+07 | 2.44E+07 | 3.43E+07 | 3.48E+07 | 3.07E+07 |
| 1.45E+06 | 1.38E+06 | 1.59E+06 | 1.31E+06 | 1.32E+06 | 1.12E+06 | 1.61E+06 | 1.99E+06 | 1.54E+06 |
| 1.72E+05 | 1.76E+05 | 2.26E+05 | 1.98E+05 | 1.01E+05 | 1.68E+05 | 3.17E+05 | 1.68E+05 | 2.51E+05 |
| 5.15E+05 | 5.29E+05 | 6.27E+05 | 4.37E+05 | 2.65E+05 | 2.57E+05 | 7.11E+05 | 1.02E+06 | 8.65E+05 |
| 1.05E+05 | 9.00E+00 | 9.00E+00 | 9.00E+00 | 9.00E+00 | 8.55E+04 | 9.00E+04 | 1.64E+05 | 6.16E+04 |
| 9.00E+00 | 9.00E+00 | 9.00E+00 | 1.99E+04 | 9.00E+00 | 9.00E+00 | 4.05E+04 | 2.22E+04 | 4.31E+04 |
| 9.62E+02 | 1.74E+03 | 1.66E+03 | 8.49E+02 | 7.64E+02 | 1.94E+03 | 1.50E+03 | 4.24E+03 | 1.61E+03 |
| 3.82E+03 | 4.53E+03 | 4.33E+03 | 4.42E+03 | 4.03E+03 | 4.78E+03 | 4.57E+03 | 7.24E+03 | 5.28E+03 |
| 3.42E+03 | 2.76E+03 | 5.19E+03 | 3.62E+03 | 5.57E+03 | 3.55E+03 | 6.46E+03 | 6.00E+03 | 4.89E+03 |
| 1.03E+05 | 1.03E+05 | 1.19E+05 | 1.23E+05 | 1.08E+05 | 1.01E+05 | 1.16E+05 | 1.56E+05 | 1.16E+05 |
| 7.39E+03 | 6.83E+03 | 7.42E+03 | 6.02E+03 | 6.39E+03 | 6.33E+03 | 7.31E+03 | 8.43E+03 | 7.79E+03 |
| 1.81E+03 | 2.17E+03 | 1.95E+03 | 1.43E+03 | 2.64E+03 | 1.73E+03 | 1.78E+03 | 1.68E+03 | 1.85E+03 |

|          |          |          |          |          |          |          |          |          |
|----------|----------|----------|----------|----------|----------|----------|----------|----------|
| 1.94E+06 | 1.45E+06 | 1.95E+06 | 1.77E+06 | 1.85E+06 | 1.52E+06 | 1.89E+06 | 2.19E+06 | 1.39E+06 |
| 1.23E+04 | 1.57E+04 | 1.80E+04 | 1.50E+04 | 1.71E+04 | 1.34E+04 | 1.36E+04 | 1.59E+04 | 1.39E+04 |
| 1.40E+05 | 1.46E+05 | 1.56E+05 | 1.38E+05 | 1.44E+05 | 1.37E+05 | 1.38E+05 | 1.60E+05 | 1.47E+05 |
| 2.86E+06 | 3.16E+06 | 3.37E+06 | 2.91E+06 | 3.39E+06 | 3.14E+06 | 2.89E+06 | 3.34E+06 | 3.23E+06 |
| 5.68E+03 | 4.06E+03 | 4.89E+03 | 5.69E+03 | 9.01E+03 | 4.87E+03 | 2.85E+03 | 6.44E+03 | 3.30E+03 |
| 2.62E+04 | 2.24E+04 | 1.70E+04 | 1.69E+04 | 9.47E+03 | 1.32E+04 | 1.44E+04 | 1.54E+04 | 1.63E+04 |
| 1.57E+04 | 9.33E+03 | 2.00E+04 | 1.37E+04 | 1.59E+04 | 9.65E+03 | 1.93E+04 | 2.11E+04 | 1.55E+04 |
| 4.85E+04 | 2.10E+04 | 2.11E+04 | 1.80E+04 | 5.52E+04 | 2.68E+04 | 6.74E+04 | 8.73E+04 | 6.28E+04 |
| 1.66E+04 | 1.07E+04 | 2.07E+04 | 1.56E+04 | 1.52E+04 | 9.00E+00 | 1.25E+04 | 3.32E+04 | 1.93E+04 |
| 9.00E+00 | 9.00E+00 | 1.73E+04 | 9.00E+00 | 9.00E+00 | 7.03E+03 | 9.00E+00 | 1.02E+04 | 1.91E+04 |
| 6.38E+03 | 5.07E+03 | 1.46E+04 | 2.15E+04 | 4.20E+03 | 1.26E+04 | 1.46E+04 | 1.26E+04 | 5.72E+03 |
| 9.00E+00 | 9.00E+00 | 9.00E+00 | 5.83E+03 | 9.00E+00 | 9.00E+00 | 9.00E+00 | 1.59E+04 | 9.00E+00 |
| 4.58E+04 | 5.03E+04 | 4.98E+04 | 3.35E+04 | 3.42E+04 | 3.44E+04 | 6.13E+04 | 9.66E+04 | 5.68E+04 |
| 4.12E+05 | 9.03E+05 | 1.03E+06 | 8.49E+05 | 7.95E+05 | 6.91E+05 | 9.24E+05 | 1.48E+06 | 8.60E+05 |
| 2.64E+07 | 2.61E+07 | 2.82E+07 | 2.40E+07 | 2.33E+07 | 2.24E+07 | 2.89E+07 | 4.89E+07 | 2.84E+07 |
| 1.68E+06 | 2.38E+06 | 1.79E+06 | 1.43E+06 | 1.86E+06 | 1.77E+06 | 1.85E+06 | 2.57E+06 | 2.06E+06 |
| 3.15E+06 | 3.02E+06 | 3.61E+06 | 2.88E+06 | 9.55E+05 | 3.20E+06 | 3.59E+06 | 4.79E+06 | 4.14E+06 |
| 1.15E+07 | 1.10E+07 | 1.54E+07 | 1.03E+07 | 1.15E+07 | 1.07E+07 | 1.49E+07 | 2.03E+07 | 1.56E+07 |
| 1.37E+04 | 1.37E+04 | 1.06E+04 | 2.68E+03 | 5.53E+03 | 2.20E+04 | 6.18E+03 | 1.63E+04 | 2.29E+04 |
| 1.95E+05 | 2.80E+05 | 1.92E+05 | 2.88E+05 | 2.67E+05 | 1.91E+05 | 3.23E+05 | 3.73E+05 | 3.04E+05 |
| 9.00E+00 | 9.00E+00 | 2.21E+05 | 9.00E+00 | 9.00E+00 | 9.00E+00 | 2.31E+05 | 4.67E+05 | 2.75E+05 |
| 2.38E+07 | 2.56E+07 | 2.74E+07 | 2.69E+07 | 2.45E+07 | 2.68E+07 | 2.39E+07 | 3.11E+07 | 2.94E+07 |
| 1.48E+05 | 1.96E+05 | 1.41E+05 | 7.20E+04 | 1.52E+05 | 1.83E+05 | 1.40E+05 | 1.11E+05 | 1.16E+05 |
| 1.19E+07 | 9.04E+06 | 1.06E+07 | 6.53E+06 | 8.57E+06 | 7.97E+06 | 1.01E+07 | 1.22E+07 | 9.26E+06 |
| 5.88E+05 | 7.82E+05 | 7.72E+05 | 5.26E+05 | 6.15E+05 | 5.94E+05 | 6.52E+05 | 8.29E+05 | 7.57E+05 |
| 4.29E+05 | 4.11E+05 | 4.91E+05 | 3.74E+05 | 4.44E+05 | 4.78E+05 | 6.01E+05 | 6.65E+05 | 6.06E+05 |
| 1.20E+05 | 1.16E+05 | 1.63E+05 | 1.10E+05 | 1.15E+05 | 1.07E+05 | 2.01E+05 | 2.63E+05 | 1.80E+05 |
| 2.52E+04 | 3.24E+04 | 4.53E+04 | 4.92E+04 | 3.73E+04 | 3.36E+04 | 2.17E+04 | 4.08E+04 | 4.20E+04 |
| 4.59E+05 | 5.59E+05 | 6.24E+05 | 4.52E+05 | 5.08E+05 | 4.98E+05 | 5.00E+05 | 7.20E+05 | 6.06E+05 |
| 1.60E+05 | 2.03E+05 | 1.33E+05 | 2.06E+05 | 1.13E+05 | 1.42E+05 | 2.23E+05 | 1.64E+05 | 1.72E+05 |
| 2.00E+05 | 2.27E+05 | 2.85E+05 | 2.30E+05 | 2.26E+05 | 1.98E+05 | 2.14E+05 | 2.96E+05 | 2.53E+05 |
| 5.18E+05 | 5.79E+05 | 6.74E+05 | 6.32E+05 | 5.49E+05 | 1.68E+05 | 9.00E+00 | 1.23E+06 | 1.53E+05 |
| 7.03E+03 | 1.15E+04 | 1.21E+04 | 7.04E+03 | 8.23E+03 | 8.32E+03 | 1.14E+04 | 1.07E+04 | 6.93E+03 |
| 9.00E+00 | 9.00E+00 | 9.00E+00 | 2.89E+04 | 1.05E+04 | 9.00E+00 | 9.00E+00 | 5.93E+04 | 9.00E+00 |
| 1.31E+06 | 1.26E+06 | 1.67E+06 | 1.32E+06 | 1.24E+06 | 1.21E+06 | 1.52E+06 | 1.93E+06 | 1.76E+06 |
| 9.00E+00 | 9.00E+00 | 9.00E+00 | 1.06E+03 | 9.00E+00 | 9.00E+00 | 2.06E+03 | 2.12E+03 | 3.04E+03 |
| 9.00E+00 | 2.72E+04 | 9.00E+00 |
| 5.09E+05 | 5.21E+05 | 8.14E+05 | 5.66E+05 | 6.02E+05 | 5.88E+05 | 6.45E+05 | 7.47E+05 | 6.43E+05 |
| 1.64E+05 | 1.58E+05 | 1.96E+05 | 1.47E+05 | 1.31E+05 | 1.21E+05 | 1.83E+05 | 2.30E+05 | 1.70E+05 |
| 4.20E+03 | 9.00E+00 | 5.11E+03 | 4.18E+03 | 1.47E+04 | 1.14E+04 | 9.00E+00 | 9.00E+00 | 9.00E+00 |
| 9.00E+00 | 2.65E+04 | 9.00E+00 | 9.00E+00 | 3.16E+04 | 9.00E+00 | 3.28E+04 | 5.24E+04 | 3.61E+04 |
| 1.66E+06 | 1.27E+06 | 2.14E+06 | 1.44E+06 | 1.75E+06 | 1.33E+06 | 3.11E+06 | 4.83E+06 | 2.90E+06 |
| 1.36E+04 | 1.09E+04 | 1.04E+04 | 1.12E+04 | 8.29E+03 | 1.44E+04 | 1.82E+04 | 2.06E+04 | 1.67E+04 |
| 1.26E+06 | 1.48E+06 | 2.04E+06 | 1.29E+06 | 1.29E+06 | 1.50E+06 | 1.57E+06 | 2.57E+06 | 1.43E+06 |
| 3.26E+04 | 4.01E+04 | 3.73E+04 | 2.74E+04 | 2.24E+04 | 3.21E+04 | 2.41E+04 | 3.51E+04 | 1.99E+04 |
| 1.62E+05 | 2.85E+05 | 3.24E+05 | 1.50E+05 | 1.93E+05 | 3.73E+05 | 1.84E+05 | 2.65E+05 | 2.00E+05 |
| 9.47E+04 | 7.40E+04 | 1.47E+05 | 8.28E+04 | 9.09E+04 | 8.14E+04 | 2.25E+05 | 3.62E+05 | 1.69E+05 |
| 2.26E+07 | 2.01E+07 | 2.77E+07 | 2.10E+07 | 1.96E+07 | 1.92E+07 | 2.42E+07 | 3.01E+07 | 2.28E+07 |
| 5.03E+05 | 7.26E+05 | 7.59E+05 | 4.32E+05 | 6.91E+05 | 4.92E+05 | 6.76E+05 | 9.70E+05 | 7.20E+05 |
| 4.46E+04 | 4.25E+04 | 4.86E+04 | 3.79E+04 | 3.24E+04 | 2.94E+04 | 5.26E+04 | 2.84E+04 | 2.12E+04 |
| 5.06E+05 | 6.82E+05 | 6.90E+05 | 5.23E+05 | 5.26E+05 | 5.74E+05 | 8.17E+05 | 7.71E+05 | 8.09E+05 |
| 7.46E+04 | 2.97E+04 | 1.22E+05 | 5.56E+04 | 7.23E+04 | 6.19E+04 | 5.60E+04 | 1.19E+05 | 8.93E+04 |
| 2.36E+07 | 2.01E+07 | 2.83E+07 | 2.39E+07 | 2.29E+07 | 2.11E+07 | 3.42E+07 | 5.28E+07 | 2.86E+07 |
| 1.86E+07 | 2.16E+07 | 2.54E+07 | 1.83E+07 | 2.11E+07 | 1.88E+07 | 1.97E+07 | 3.09E+07 | 2.38E+07 |

|          |          |          |          |          |          |          |          |          |
|----------|----------|----------|----------|----------|----------|----------|----------|----------|
| 1.01E+06 | 1.38E+06 | 1.54E+06 | 1.61E+06 | 1.61E+06 | 1.50E+06 | 1.39E+06 | 1.75E+06 | 1.28E+06 |
| 7.03E+02 | 1.20E+03 | 7.18E+02 | 1.44E+03 | 1.91E+03 | 1.71E+03 | 9.00E+00 | 9.00E+00 | 9.00E+00 |
| 2.17E+05 | 9.75E+05 | 1.06E+06 | 9.23E+05 | 1.10E+06 | 8.83E+05 | 1.08E+06 | 1.63E+06 | 9.98E+05 |
| 3.25E+06 | 3.41E+06 | 3.70E+06 | 3.55E+06 | 3.75E+06 | 3.30E+06 | 3.03E+06 | 3.98E+06 | 3.55E+06 |
| 9.43E+04 | 7.70E+04 | 1.62E+05 | 9.31E+04 | 9.37E+04 | 8.25E+04 | 1.71E+05 | 2.82E+05 | 1.25E+05 |
| 3.36E+05 | 3.79E+05 | 3.48E+05 | 3.15E+05 | 3.39E+05 | 1.82E+05 | 2.86E+05 | 4.23E+05 | 3.71E+05 |
| 4.57E+04 | 3.41E+04 | 5.51E+04 | 3.30E+04 | 3.69E+04 | 3.44E+04 | 8.57E+04 | 1.53E+05 | 7.94E+04 |
| 8.96E+05 | 1.06E+06 | 1.31E+06 | 9.72E+05 | 1.25E+06 | 1.06E+06 | 1.18E+06 | 1.24E+06 | 1.00E+06 |
| 6.26E+04 | 7.57E+04 | 8.88E+04 | 7.46E+04 | 9.12E+04 | 8.49E+04 | 5.40E+04 | 7.47E+04 | 4.42E+04 |
| 3.26E+03 | 1.04E+03 | 5.32E+03 | 1.05E+03 | 4.97E+03 | 4.97E+03 | 1.77E+03 | 1.52E+03 | 3.58E+03 |
| 9.00E+00 | 9.00E+00 | 9.00E+00 | 9.00E+00 | 9.00E+00 | 1.63E+04 | 8.40E+03 | 9.00E+00 | 9.00E+00 |
| 6.66E+03 | 1.08E+04 | 6.88E+03 | 8.59E+03 | 1.55E+04 | 2.88E+04 | 9.00E+00 | 9.00E+00 | 9.00E+00 |
| 6.82E+03 | 1.51E+04 | 2.26E+04 | 1.42E+04 | 2.29E+04 | 1.80E+04 | 6.56E+03 | 2.28E+04 | 2.10E+04 |
| 9.00E+00 | 9.00E+00 | 9.00E+00 | 9.00E+00 | 1.23E+03 | 9.00E+00 | 9.00E+00 | 9.00E+00 | 1.59E+03 |
| 8.87E+03 | 2.76E+04 | 2.85E+04 | 3.07E+04 | 2.69E+04 | 2.78E+04 | 6.83E+03 | 1.89E+04 | 1.68E+04 |
| 5.58E+02 | 9.00E+00 | 9.00E+00 | 1.18E+03 | 9.00E+00 | 9.00E+00 | 9.00E+00 | 5.80E+02 | 9.00E+00 |
| 1.45E+04 | 1.97E+04 | 2.15E+04 | 1.81E+04 | 1.57E+04 | 1.76E+04 | 9.00E+00 | 9.00E+00 | 9.00E+00 |
| 1.93E+05 | 1.82E+05 | 2.52E+05 | 2.14E+05 | 1.84E+05 | 2.13E+05 | 2.24E+05 | 3.41E+05 | 2.03E+05 |
| 9.86E+04 | 9.14E+04 | 1.36E+05 | 1.13E+05 | 1.03E+05 | 1.08E+05 | 1.24E+05 | 1.82E+05 | 1.41E+05 |
| 2.09E+04 | 1.54E+04 | 2.68E+04 | 2.54E+04 | 1.48E+04 | 3.00E+04 | 3.00E+04 | 1.43E+04 | 1.32E+04 |
| 3.22E+05 | 2.88E+05 | 4.71E+05 | 2.41E+05 | 2.89E+05 | 2.47E+05 | 7.78E+05 | 1.28E+06 | 7.16E+05 |
| 7.86E+05 | 6.02E+05 | 1.29E+06 | 6.77E+05 | 6.84E+05 | 5.54E+05 | 2.12E+06 | 4.22E+06 | 1.79E+06 |
| 9.48E+05 | 8.24E+05 | 1.55E+06 | 8.49E+05 | 9.66E+05 | 7.58E+05 | 2.47E+06 | 3.74E+06 | 1.93E+06 |
| 2.56E+04 | 2.78E+04 | 3.74E+04 | 1.14E+04 | 3.92E+04 | 3.53E+04 | 3.91E+04 | 6.41E+04 | 3.91E+04 |
| 1.96E+05 | 1.80E+05 | 2.47E+05 | 2.03E+05 | 1.79E+05 | 1.76E+05 | 2.31E+05 | 3.62E+05 | 2.12E+05 |
| 8.93E+03 | 1.59E+04 | 2.52E+04 | 2.50E+04 | 1.18E+04 | 1.32E+04 | 1.26E+04 | 1.32E+04 | 1.65E+04 |
| 1.10E+05 | 3.64E+04 | 4.00E+04 | 1.05E+05 | 1.37E+05 | 1.21E+05 | 4.38E+04 | 7.30E+04 | 6.13E+04 |
| 9.00E+00 |
| 9.00E+00 | 9.00E+00 | 9.00E+00 | 9.00E+00 | 9.00E+00 | 2.20E+03 | 5.73E+03 | 9.00E+00 | 9.00E+00 |
| 1.11E+06 | 1.12E+06 | 9.41E+05 | 1.03E+06 | 1.06E+06 | 9.46E+05 | 8.39E+05 | 9.94E+05 | 8.99E+05 |
| 9.00E+00 |
| 4.41E+04 | 8.19E+04 | 7.30E+04 | 6.96E+04 | 5.77E+04 | 7.11E+04 | 7.53E+04 | 6.95E+04 | 8.11E+04 |
| 1.42E+06 | 1.48E+06 | 1.43E+06 | 7.94E+05 | 1.51E+06 | 9.23E+05 | 1.41E+06 | 1.44E+06 | 6.49E+05 |
| 5.66E+05 | 5.71E+05 | 7.18E+05 | 4.21E+05 | 5.75E+05 | 4.96E+05 | 8.47E+05 | 1.14E+06 | 8.12E+05 |
| 7.79E+04 | 5.94E+04 | 5.62E+04 | 6.25E+04 | 6.31E+04 | 6.75E+04 | 7.41E+04 | 9.00E+04 | 5.17E+04 |
| 9.00E+00 | 9.00E+00 | 9.00E+00 | 9.15E+03 | 1.28E+04 | 3.11E+03 | 8.03E+03 | 1.56E+04 | 1.11E+04 |
| 5.11E+07 | 4.80E+07 | 5.65E+07 | 5.53E+07 | 5.05E+07 | 4.55E+07 | 5.68E+07 | 7.93E+07 | 6.30E+07 |
| 2.22E+05 | 3.36E+05 | 3.07E+05 | 3.36E+05 | 2.84E+05 | 2.37E+05 | 3.18E+05 | 3.91E+05 | 3.00E+05 |
| 1.74E+06 | 1.68E+06 | 1.80E+06 | 1.65E+06 | 1.62E+06 | 1.65E+06 | 1.60E+06 | 1.79E+06 | 1.66E+06 |
| 1.21E+06 | 1.22E+06 | 1.50E+06 | 1.53E+06 | 1.23E+06 | 1.30E+06 | 1.53E+06 | 1.93E+06 | 1.32E+06 |
| 9.60E+03 | 9.42E+03 | 7.14E+03 | 1.02E+04 | 7.95E+03 | 1.20E+04 | 8.14E+03 | 1.40E+04 | 9.17E+03 |
| 3.20E+05 | 3.71E+05 | 4.30E+05 | 2.80E+05 | 3.80E+05 | 3.50E+05 | 1.88E+05 | 3.34E+05 | 2.79E+05 |
| 5.36E+03 | 8.57E+03 | 9.94E+03 | 5.00E+03 | 7.71E+03 | 8.10E+03 | 3.19E+03 | 7.10E+03 | 5.45E+03 |
| 1.07E+04 | 8.77E+03 | 1.38E+04 | 1.14E+04 | 9.93E+03 | 6.76E+03 | 2.59E+04 | 4.07E+04 | 2.04E+04 |
| 9.00E+00 | 9.00E+00 | 4.30E+03 | 9.00E+00 | 9.00E+00 | 9.00E+00 | 2.54E+03 | 4.57E+03 | 3.16E+03 |
| 5.79E+04 | 5.02E+04 | 8.62E+04 | 4.93E+04 | 5.04E+04 | 5.04E+04 | 1.26E+05 | 2.13E+05 | 1.07E+05 |
| 5.92E+04 | 2.02E+04 | 4.86E+04 | 5.88E+04 | 5.99E+04 | 1.38E+04 | 5.29E+04 | 7.12E+04 | 3.76E+04 |
| 1.28E+06 | 1.27E+06 | 1.45E+06 | 1.42E+06 | 1.35E+06 | 1.13E+06 | 1.46E+06 | 1.42E+06 | 1.25E+06 |
| 1.81E+07 | 2.10E+07 | 1.31E+07 | 1.69E+07 | 1.97E+07 | 1.08E+07 | 1.93E+07 | 1.77E+07 | 1.26E+07 |
| 1.22E+08 | 1.22E+08 | 1.32E+08 | 1.10E+08 | 1.15E+08 | 1.12E+08 | 1.21E+08 | 1.48E+08 | 1.21E+08 |
| 4.83E+06 | 5.19E+06 | 5.49E+06 | 5.15E+06 | 5.16E+06 | 4.15E+06 | 4.13E+06 | 6.18E+06 | 5.11E+06 |
| 2.63E+05 | 2.55E+05 | 3.38E+05 | 3.39E+05 | 3.12E+05 | 3.30E+05 | 2.50E+05 | 3.29E+05 | 2.67E+05 |
| 9.25E+04 | 9.08E+04 | 1.40E+05 | 1.04E+05 | 9.67E+04 | 1.04E+05 | 1.18E+05 | 1.70E+05 | 1.21E+05 |
| 1.93E+05 | 2.09E+05 | 2.92E+05 | 2.63E+05 | 2.19E+05 | 2.48E+05 | 1.99E+05 | 2.72E+05 | 2.45E+05 |

|          |          |          |          |          |          |          |          |          |
|----------|----------|----------|----------|----------|----------|----------|----------|----------|
| 1.56E+04 | 2.49E+04 | 4.25E+04 | 2.10E+04 | 2.14E+04 | 1.60E+04 | 6.00E+04 | 1.02E+05 | 6.28E+04 |
| 2.14E+03 | 3.57E+03 | 3.70E+03 | 2.31E+03 | 3.04E+03 | 3.11E+03 | 5.01E+03 | 7.86E+03 | 7.27E+03 |
| 2.95E+05 | 3.57E+05 | 3.95E+05 | 2.43E+05 | 3.27E+05 | 3.04E+05 | 4.60E+05 | 5.94E+05 | 4.95E+05 |
| 6.78E+04 | 7.90E+04 | 1.18E+05 | 8.21E+04 | 4.38E+04 | 6.84E+04 | 7.30E+04 | 1.18E+05 | 6.72E+04 |
| 1.62E+06 | 1.26E+06 | 2.08E+06 | 1.65E+06 | 1.50E+06 | 1.32E+06 | 2.70E+06 | 3.90E+06 | 2.27E+06 |
| 4.01E+04 | 4.52E+04 | 4.12E+04 | 4.98E+04 | 4.70E+04 | 7.76E+04 | 3.84E+04 | 6.18E+04 | 3.86E+04 |
| 1.77E+04 | 1.32E+04 | 2.48E+04 | 1.08E+04 | 1.33E+04 | 1.18E+04 | 3.71E+04 | 6.59E+04 | 3.93E+04 |
| 5.06E+04 | 2.01E+04 | 5.84E+04 | 4.42E+04 | 3.48E+04 | 3.75E+04 | 9.00E+00 | 9.00E+00 | 9.00E+00 |
| 3.80E+06 | 4.37E+06 | 4.66E+06 | 4.33E+06 | 3.61E+06 | 3.96E+06 | 4.15E+06 | 5.67E+06 | 4.16E+06 |
| 5.04E+04 | 2.96E+04 | 4.13E+04 | 4.29E+04 | 2.15E+04 | 5.56E+04 | 2.28E+04 | 3.33E+04 | 2.87E+04 |
| 9.00E+00 | 9.00E+00 | 9.00E+00 | 3.14E+04 | 9.00E+00 | 3.68E+04 | 4.47E+04 | 8.94E+04 | 4.93E+04 |
| 3.11E+06 | 2.79E+06 | 2.93E+06 | 2.47E+06 | 2.43E+06 | 2.46E+06 | 3.42E+06 | 5.16E+06 | 3.27E+06 |
| 4.26E+06 | 5.64E+06 | 5.85E+06 | 5.31E+06 | 6.07E+06 | 4.45E+06 | 5.88E+06 | 7.80E+06 | 6.04E+06 |
| 1.70E+06 | 2.03E+06 | 2.06E+06 | 1.34E+06 | 1.82E+06 | 1.80E+06 | 2.17E+06 | 3.54E+06 | 2.43E+06 |
| 6.16E+05 | 5.87E+05 | 8.06E+05 | 7.25E+05 | 7.00E+05 | 5.78E+05 | 1.12E+06 | 1.40E+06 | 9.42E+05 |
| 1.12E+07 | 1.04E+07 | 1.69E+07 | 1.17E+07 | 1.03E+07 | 1.06E+07 | 2.03E+07 | 3.60E+07 | 1.90E+07 |
| 4.23E+06 | 3.25E+06 | 6.33E+06 | 4.09E+06 | 3.56E+06 | 3.27E+06 | 7.78E+06 | 1.31E+07 | 7.15E+06 |
| 1.33E+06 | 1.56E+06 | 1.67E+06 | 1.19E+06 | 1.30E+06 | 1.24E+06 | 2.38E+06 | 3.09E+06 | 1.87E+06 |
| 3.17E+07 | 3.27E+07 | 3.21E+07 | 2.62E+07 | 2.73E+07 | 2.71E+07 | 2.67E+07 | 4.19E+07 | 2.81E+07 |
| 6.91E+04 | 9.77E+04 | 1.04E+05 | 1.17E+04 | 4.50E+04 | 6.04E+04 | 2.65E+04 | 9.38E+04 | 5.39E+04 |
| 2.53E+04 | 1.81E+04 | 4.08E+04 | 2.07E+04 | 2.15E+04 | 1.92E+04 | 5.80E+04 | 1.03E+05 | 4.32E+04 |
| 2.60E+05 | 2.09E+05 | 4.12E+05 | 2.35E+05 | 2.34E+05 | 2.19E+05 | 6.19E+05 | 1.22E+06 | 5.76E+05 |
| 2.63E+06 | 3.41E+06 | 3.31E+06 | 2.10E+06 | 3.00E+06 | 2.58E+06 | 2.70E+06 | 3.40E+06 | 2.88E+06 |
| 3.61E+07 | 3.61E+07 | 4.43E+07 | 3.97E+07 | 4.01E+07 | 3.46E+07 | 4.10E+07 | 5.03E+07 | 4.23E+07 |
| 1.34E+06 | 1.14E+06 | 1.33E+06 | 1.16E+06 | 1.05E+06 | 1.02E+06 | 1.26E+06 | 1.86E+06 | 1.25E+06 |
| 3.12E+04 | 4.33E+04 | 3.82E+04 | 4.71E+04 | 5.96E+04 | 5.85E+04 | 8.28E+04 | 6.87E+04 | 5.35E+04 |
| 6.32E+05 | 5.04E+05 | 9.53E+05 | 6.91E+05 | 6.30E+05 | 5.58E+05 | 1.25E+06 | 1.83E+06 | 1.24E+06 |
| 9.00E+00 | 1.27E+04 | 9.00E+00 | 9.00E+00 | 1.83E+04 | 9.00E+00 | 3.60E+04 | 4.07E+04 | 2.67E+04 |
| 6.65E+05 | 7.44E+05 | 9.58E+05 | 7.01E+05 | 6.33E+05 | 6.96E+05 | 1.01E+06 | 1.36E+06 | 8.86E+05 |
| 1.39E+06 | 1.07E+06 | 1.75E+06 | 1.29E+06 | 1.29E+06 | 1.05E+06 | 1.82E+06 | 2.57E+06 | 1.73E+06 |
| 1.72E+06 | 1.96E+06 | 2.41E+06 | 2.61E+06 | 2.25E+06 | 1.82E+06 | 1.97E+06 | 2.59E+06 | 2.46E+06 |
| 8.59E+04 | 6.63E+04 | 1.34E+05 | 9.32E+04 | 8.66E+04 | 7.73E+04 | 2.25E+05 | 3.17E+05 | 1.82E+05 |
| 7.38E+04 | 6.30E+04 | 1.25E+05 | 9.45E+04 | 8.11E+04 | 8.56E+04 | 1.65E+05 | 1.70E+05 | 1.13E+05 |
| 3.64E+05 | 4.35E+05 | 4.28E+05 | 2.61E+05 | 3.93E+05 | 3.49E+05 | 4.80E+05 | 7.87E+05 | 6.62E+05 |
| 4.48E+05 | 3.96E+05 | 3.76E+05 | 4.00E+05 | 3.69E+05 | 3.38E+05 | 1.06E+06 | 1.59E+06 | 7.96E+05 |
| 4.38E+06 | 4.53E+06 | 5.62E+06 | 4.45E+06 | 4.26E+06 | 4.01E+06 | 4.97E+06 | 7.80E+06 | 5.34E+06 |
| 2.13E+06 | 1.99E+06 | 2.23E+06 | 1.86E+06 | 1.61E+06 | 1.68E+06 | 2.47E+06 | 3.28E+06 | 2.57E+06 |
| 1.66E+06 | 1.65E+06 | 1.89E+06 | 1.77E+06 | 1.64E+06 | 1.56E+06 | 2.41E+06 | 2.99E+06 | 2.39E+06 |
| 8.68E+04 | 8.60E+04 | 1.17E+05 | 6.86E+04 | 9.86E+04 | 7.74E+04 | 1.32E+05 | 2.30E+05 | 1.45E+05 |
| 1.92E+07 | 1.67E+07 | 2.82E+07 | 2.19E+07 | 1.95E+07 | 1.90E+07 | 3.84E+07 | 5.38E+07 | 3.51E+07 |
| 9.00E+05 | 9.27E+05 | 1.23E+06 | 1.18E+06 | 1.02E+06 | 1.09E+06 | 1.79E+06 | 2.32E+06 | 1.57E+06 |
| 7.69E+06 | 6.15E+06 | 1.20E+07 | 7.89E+06 | 7.60E+06 | 6.92E+06 | 1.71E+07 | 2.84E+07 | 1.52E+07 |
| 1.29E+06 | 1.28E+06 | 1.60E+06 | 1.28E+06 | 1.27E+06 | 1.18E+06 | 1.43E+06 | 2.17E+06 | 1.58E+06 |
| 3.57E+07 | 5.67E+07 | 3.60E+07 | 5.87E+07 | 2.31E+07 | 4.47E+07 | 5.56E+07 | 3.51E+07 | 6.35E+07 |
| 4.86E+04 | 5.86E+04 | 5.28E+04 | 3.50E+04 | 5.44E+04 | 5.49E+04 | 7.51E+04 | 1.11E+05 | 5.86E+04 |
| 7.37E+04 | 5.18E+04 | 1.15E+05 | 7.39E+04 | 6.19E+04 | 5.71E+04 | 1.47E+05 | 2.25E+05 | 1.11E+05 |
| 5.93E+05 | 4.52E+05 | 9.29E+05 | 5.80E+05 | 5.40E+05 | 4.71E+05 | 1.46E+06 | 2.39E+06 | 1.27E+06 |
| 2.11E+05 | 1.54E+05 | 3.44E+05 | 1.96E+05 | 1.89E+05 | 1.66E+05 | 5.77E+05 | 8.14E+05 | 3.66E+05 |
| 3.09E+07 | 2.69E+07 | 3.37E+07 | 3.06E+07 | 2.80E+07 | 2.68E+07 | 3.38E+07 | 5.15E+07 | 3.19E+07 |
| 2.34E+06 | 2.09E+06 | 2.65E+06 | 1.84E+06 | 2.14E+06 | 2.01E+06 | 2.33E+06 | 2.88E+06 | 2.36E+06 |
| 5.81E+07 | 5.78E+07 | 7.70E+07 | 6.19E+07 | 6.52E+07 | 5.39E+07 | 7.19E+07 | 1.02E+08 | 7.38E+07 |
| 1.91E+06 | 1.59E+06 | 2.07E+06 | 1.89E+06 | 1.73E+06 | 6.95E+05 | 8.80E+05 | 2.78E+06 | 1.87E+06 |
| 5.65E+05 | 4.28E+05 | 4.75E+05 | 3.92E+05 | 3.78E+05 | 4.01E+05 | 5.39E+05 | 8.04E+05 | 5.48E+05 |
| 3.42E+07 | 2.99E+07 | 4.97E+07 | 3.69E+07 | 3.86E+07 | 3.13E+07 | 6.50E+07 | 9.04E+07 | 5.23E+07 |

|          |          |          |          |          |          |          |          |          |
|----------|----------|----------|----------|----------|----------|----------|----------|----------|
| 7.95E+05 | 6.46E+05 | 1.00E+06 | 9.05E+05 | 7.57E+05 | 7.87E+05 | 1.46E+06 | 2.02E+06 | 1.67E+06 |
| 2.10E+05 | 1.60E+05 | 3.25E+05 | 2.07E+05 | 1.96E+05 | 1.81E+05 | 4.45E+05 | 7.05E+05 | 3.92E+05 |
| 1.08E+07 | 7.81E+06 | 1.59E+07 | 9.97E+06 | 9.76E+06 | 8.22E+06 | 2.07E+07 | 3.02E+07 | 1.77E+07 |
| 2.03E+06 | 1.44E+06 | 2.98E+06 | 2.06E+06 | 2.12E+06 | 1.52E+06 | 3.98E+06 | 5.99E+06 | 3.42E+06 |
| 4.63E+07 | 4.49E+07 | 5.24E+07 | 4.85E+07 | 5.04E+07 | 4.73E+07 | 5.72E+07 | 7.57E+07 | 5.49E+07 |
| 1.89E+05 | 2.24E+05 | 2.40E+05 | 1.88E+05 | 1.50E+05 | 2.15E+05 | 1.80E+05 | 5.92E+04 | 1.82E+05 |
| 1.22E+06 | 9.56E+05 | 2.01E+06 | 1.12E+06 | 1.12E+06 | 9.22E+05 | 3.58E+06 | 6.06E+06 | 2.84E+06 |
| 1.76E+06 | 1.85E+06 | 2.55E+06 | 1.49E+06 | 2.18E+06 | 1.92E+06 | 2.61E+06 | 3.61E+06 | 2.84E+06 |
| 1.62E+07 | 1.59E+07 | 2.11E+07 | 1.80E+07 | 1.71E+07 | 1.82E+07 | 2.32E+07 | 2.55E+07 | 2.02E+07 |
| 5.72E+04 | 4.55E+04 | 8.54E+04 | 6.70E+04 | 5.36E+04 | 4.74E+04 | 2.76E+05 | 4.88E+05 | 2.64E+05 |
| 4.68E+04 | 3.87E+04 | 7.11E+04 | 4.29E+04 | 4.89E+04 | 3.91E+04 | 1.60E+05 | 2.77E+05 | 1.28E+05 |
| 8.54E+05 | 6.54E+05 | 1.22E+06 | 9.66E+05 | 8.30E+05 | 7.91E+05 | 1.29E+06 | 1.87E+06 | 1.48E+06 |
| 3.28E+05 | 3.61E+05 | 4.76E+05 | 4.53E+05 | 3.84E+05 | 3.95E+05 | 3.96E+05 | 4.35E+05 | 4.43E+05 |
| 1.82E+05 | 1.78E+05 | 2.28E+05 | 2.13E+05 | 2.10E+05 | 1.62E+05 | 2.53E+05 | 3.28E+05 | 2.48E+05 |
| 5.67E+04 | 6.68E+04 | 7.03E+04 | 3.75E+04 | 5.49E+04 | 5.39E+04 | 7.93E+04 | 1.00E+05 | 7.72E+04 |
| 9.51E+04 | 7.98E+04 | 1.19E+05 | 1.08E+05 | 9.61E+04 | 8.12E+04 | 1.44E+05 | 2.26E+05 | 1.37E+05 |
| 9.00E+00 |
| 9.00E+00 | 9.00E+00 | 9.00E+00 | 4.23E+04 | 9.00E+00 | 9.00E+00 | 6.54E+04 | 1.03E+05 | 7.09E+04 |
| 5.93E+04 | 6.29E+04 | 7.69E+04 | 6.56E+04 | 5.86E+04 | 5.26E+04 | 8.03E+04 | 1.19E+05 | 7.41E+04 |
| 9.00E+00 | 9.00E+00 | 9.00E+00 | 2.93E+04 | 2.66E+04 | 9.00E+00 | 3.42E+04 | 4.78E+04 | 3.83E+04 |
| 7.27E+05 | 6.01E+05 | 1.03E+06 | 7.93E+05 | 7.53E+05 | 6.86E+05 | 1.37E+06 | 1.88E+06 | 1.12E+06 |
| 1.57E+04 | 1.71E+04 | 1.98E+04 | 1.65E+04 | 1.55E+04 | 1.43E+04 | 2.48E+04 | 4.48E+04 | 2.57E+04 |
| 2.29E+05 | 1.75E+05 | 3.55E+05 | 2.23E+05 | 2.22E+05 | 1.91E+05 | 4.19E+05 | 5.76E+05 | 3.59E+05 |
| 1.80E+03 | 8.29E+03 | 6.38E+03 | 3.90E+03 | 4.23E+03 | 6.46E+03 | 4.03E+03 | 6.41E+03 | 5.10E+03 |
| 4.33E+05 | 4.22E+05 | 6.24E+05 | 4.80E+05 | 4.30E+05 | 3.91E+05 | 6.03E+05 | 8.17E+05 | 5.29E+05 |
| 1.54E+04 | 1.61E+04 | 2.16E+04 | 1.39E+04 | 1.53E+04 | 1.31E+04 | 1.91E+04 | 3.24E+04 | 1.90E+04 |
| 3.51E+05 | 3.58E+05 | 4.78E+05 | 3.94E+05 | 3.79E+05 | 3.71E+05 | 4.32E+05 | 6.25E+05 | 4.83E+05 |
| 2.06E+05 | 1.87E+05 | 2.61E+05 | 2.14E+05 | 2.15E+05 | 2.02E+05 | 2.92E+05 | 3.76E+05 | 2.69E+05 |
| 1.42E+05 | 1.87E+05 | 2.32E+05 | 1.65E+05 | 1.34E+05 | 1.65E+05 | 1.74E+05 | 2.21E+05 | 1.69E+05 |
| 1.02E+06 | 1.14E+06 | 1.23E+06 | 7.09E+05 | 1.05E+06 | 1.09E+06 | 1.11E+06 | 1.53E+06 | 1.25E+06 |
| 7.60E+02 | 9.00E+00 |
| 9.00E+00 |
| 3.33E+04 | 1.64E+04 | 3.78E+04 | 3.54E+04 | 3.21E+04 | 3.02E+04 | 5.72E+04 | 7.56E+04 | 5.41E+04 |
| 9.00E+00 | 9.00E+00 | 9.00E+00 | 9.00E+00 | 9.00E+00 | 9.00E+00 | 2.02E+03 | 3.15E+03 | 1.69E+03 |
| 2.54E+04 | 3.07E+04 | 3.94E+04 | 2.36E+04 | 2.92E+04 | 1.67E+04 | 3.66E+04 | 4.72E+04 | 3.89E+04 |
| 5.58E+04 | 5.43E+04 | 7.64E+04 | 6.63E+04 | 7.05E+04 | 5.01E+04 | 7.40E+04 | 9.12E+04 | 5.97E+04 |
| 4.48E+04 | 3.56E+04 | 6.25E+04 | 4.67E+04 | 3.95E+04 | 3.98E+04 | 7.78E+04 | 1.15E+05 | 8.16E+04 |
| 1.26E+04 | 3.60E+04 | 6.76E+04 | 1.75E+04 | 2.39E+04 | 4.15E+04 | 2.06E+04 | 6.26E+04 | 8.08E+03 |
| 1.90E+04 | 4.80E+04 | 3.62E+04 | 2.07E+04 | 2.39E+04 | 3.03E+04 | 2.78E+04 | 3.94E+04 | 2.91E+04 |
| 4.12E+04 | 1.35E+05 | 1.26E+05 | 4.68E+04 | 6.54E+04 | 1.02E+05 | 4.20E+04 | 7.75E+04 | 3.86E+04 |
| 4.99E+06 | 5.93E+06 | 6.34E+06 | 3.75E+06 | 5.00E+06 | 4.66E+06 | 7.22E+06 | 1.11E+07 | 8.10E+06 |
| 6.83E+05 | 6.49E+05 | 9.39E+05 | 7.42E+05 | 5.91E+05 | 7.17E+05 | 1.13E+06 | 1.49E+06 | 1.19E+06 |
| 3.86E+04 | 6.82E+04 | 1.06E+05 | 8.60E+04 | 9.28E+04 | 7.22E+04 | 1.31E+05 | 2.11E+05 | 1.46E+05 |
| 3.44E+07 | 2.95E+07 | 5.52E+07 | 3.47E+07 | 3.24E+07 | 3.09E+07 | 6.04E+07 | 9.31E+07 | 6.13E+07 |
| 4.95E+05 | 4.65E+05 | 5.64E+05 | 5.14E+05 | 4.16E+05 | 5.24E+05 | 6.81E+05 | 9.36E+05 | 4.76E+05 |
| 7.07E+04 | 2.03E+04 | 8.97E+04 | 7.77E+04 | 4.87E+04 | 6.88E+04 | 8.77E+04 | 1.32E+05 | 9.58E+04 |
| 7.38E+06 | 8.07E+06 | 1.62E+07 | 8.61E+06 | 8.63E+06 | 7.80E+06 | 2.30E+07 | 4.09E+07 | 1.84E+07 |
| 2.30E+06 | 1.70E+06 | 1.55E+06 | 8.64E+05 | 1.04E+06 | 1.87E+06 | 1.48E+06 | 2.70E+06 | 1.62E+06 |
| 3.98E+06 | 4.26E+06 | 6.15E+06 | 4.38E+06 | 4.04E+06 | 4.27E+06 | 7.04E+06 | 9.63E+06 | 6.43E+06 |
| 4.28E+07 | 4.30E+07 | 4.72E+07 | 4.01E+07 | 3.50E+07 | 3.93E+07 | 4.00E+07 | 5.95E+07 | 4.37E+07 |
| 4.01E+05 | 8.47E+05 | 6.52E+05 | 2.76E+05 | 3.87E+05 | 6.85E+05 | 3.82E+05 | 5.23E+05 | 3.65E+05 |
| 2.29E+04 | 1.76E+04 | 3.41E+04 | 1.69E+04 | 1.80E+04 | 3.23E+03 | 1.54E+04 | 7.70E+04 | 5.03E+04 |
| 5.13E+05 | 3.73E+05 | 8.82E+05 | 4.84E+05 | 4.46E+05 | 3.90E+05 | 1.28E+06 | 2.39E+06 | 1.01E+06 |
| 3.58E+05 | 3.16E+05 | 5.56E+05 | 3.58E+05 | 3.13E+05 | 3.35E+05 | 7.11E+05 | 1.36E+06 | 7.38E+05 |

9.99E+07 8.52E+07 9.22E+07 8.50E+07 8.09E+07 8.23E+07 9.15E+07 1.39E+08 9.86E+07  
3.07E+06 3.74E+06 3.34E+06 3.01E+06 2.68E+06 3.03E+06 3.49E+06 4.23E+06 3.63E+06  
2.96E+08 2.95E+08 3.19E+08 2.85E+08 2.99E+08 2.71E+08 3.09E+08 3.45E+08 3.06E+08  
3.62E+04 1.94E+04 5.48E+04 3.24E+04 1.78E+04 1.92E+04 9.95E+04 1.67E+05 6.77E+04  
4.74E+04 4.12E+04 5.67E+04 3.21E+04 4.07E+04 1.26E+04 7.02E+04 1.29E+05 5.76E+04  
3.54E+06 3.02E+06 4.27E+06 3.19E+06 2.80E+06 2.61E+06 4.23E+06 7.31E+06 4.14E+06  
2.41E+05 2.50E+05 2.40E+05 2.06E+05 2.64E+05 2.01E+05 2.55E+05 3.46E+05 2.84E+05  
2.08E+06 2.08E+06 2.41E+06 2.15E+06 2.23E+06 2.06E+06 2.83E+06 3.49E+06 2.58E+06  
2.06E+05 2.06E+05 2.24E+05 1.92E+05 1.90E+05 2.00E+05 2.21E+05 3.13E+05 1.76E+05  
6.54E+06 6.66E+06 7.64E+06 6.52E+06 5.65E+06 6.30E+06 7.41E+06 8.81E+06 7.49E+06  
1.19E+06 1.05E+06 2.16E+06 1.34E+06 1.15E+06 1.17E+06 3.01E+06 4.66E+06 2.82E+06  
2.44E+04 2.53E+04 3.89E+04 3.28E+04 2.97E+04 2.67E+04 6.74E+04 1.09E+05 6.01E+04  
1.73E+05 1.60E+05 2.74E+05 1.89E+05 1.66E+05 1.58E+05 3.69E+05 5.59E+05 3.70E+05  
2.06E+05 2.43E+05 2.94E+05 2.67E+05 2.12E+05 2.30E+05 2.82E+05 4.22E+05 2.57E+05  
2.53E+06 2.43E+06 3.70E+06 2.83E+06 2.37E+06 2.44E+06 3.63E+06 5.23E+06 3.42E+06  
1.66E+05 1.36E+05 2.53E+05 1.45E+05 1.65E+05 1.58E+05 2.41E+05 2.90E+05 2.14E+05  
8.41E+05 8.30E+05 1.02E+06 8.71E+05 9.18E+05 8.81E+05 1.11E+06 1.33E+06 9.59E+05  
1.49E+06 1.11E+06 2.52E+06 1.54E+06 1.36E+06 1.27E+06 3.43E+06 6.20E+06 3.21E+06  
3.89E+07 2.84E+07 5.91E+07 3.94E+07 3.64E+07 3.28E+07 8.72E+07 1.46E+08 8.08E+07  
1.54E+06 1.38E+06 2.18E+06 1.77E+06 1.65E+06 1.69E+06 2.47E+06 3.79E+06 2.71E+06  
5.54E+05 4.39E+05 8.49E+05 5.27E+05 4.95E+05 4.61E+05 1.40E+06 2.08E+06 1.11E+06  
1.07E+07 8.50E+06 1.72E+07 1.02E+07 1.02E+07 9.29E+06 2.64E+07 4.08E+07 2.18E+07  
6.00E+06 5.83E+06 7.20E+06 5.70E+06 5.46E+06 5.66E+06 7.01E+06 8.90E+06 7.02E+06  
1.25E+08 1.19E+08 1.45E+08 1.20E+08 1.16E+08 1.21E+08 1.23E+08 1.77E+08 1.45E+08  
1.59E+06 1.95E+06 2.17E+06 1.52E+06 1.85E+06 1.75E+06 1.57E+06 2.18E+06 1.49E+06  
2.14E+04 1.38E+04 2.41E+04 1.03E+04 1.30E+04 1.65E+04 5.01E+04 7.81E+04 5.31E+04  
6.99E+05 4.68E+05 1.32E+06 7.18E+05 5.68E+05 5.18E+05 2.04E+06 3.62E+06 1.68E+06  
7.65E+05 6.78E+05 1.02E+06 6.39E+05 5.92E+05 5.98E+05 1.01E+06 2.01E+06 8.07E+05  
9.64E+07 7.52E+07 1.04E+08 7.77E+07 7.21E+07 7.04E+07 1.15E+08 1.79E+08 9.75E+07  
7.12E+06 7.11E+06 7.63E+06 6.00E+06 6.68E+06 7.54E+06 9.07E+06 1.01E+07 8.43E+06  
3.44E+08 3.41E+08 3.76E+08 3.51E+08 3.29E+08 3.41E+08 2.70E+08 4.13E+08 3.78E+08  
3.75E+04 2.78E+04 6.94E+04 4.25E+04 2.57E+04 4.03E+04 1.28E+05 2.36E+05 7.40E+04  
1.09E+05 7.84E+04 1.22E+05 8.38E+04 8.08E+04 8.99E+04 1.95E+05 2.92E+05 1.41E+05  
7.35E+04 7.07E+04 8.10E+04 6.06E+04 4.99E+04 5.97E+04 9.38E+04 1.88E+05 8.72E+04  
1.49E+06 1.10E+06 1.66E+06 1.02E+06 1.08E+06 1.16E+06 2.03E+06 3.61E+06 1.95E+06  
2.06E+06 1.96E+06 2.78E+06 2.10E+06 2.08E+06 2.06E+06 2.77E+06 5.00E+06 2.84E+06  
2.49E+05 2.48E+05 4.09E+05 3.30E+05 2.74E+05 2.95E+05 5.51E+05 7.27E+05 4.54E+05  
1.75E+06 1.37E+06 2.02E+06 1.88E+06 1.78E+06 1.73E+06 2.95E+06 4.18E+06 2.86E+06  
2.48E+05 2.02E+05 3.45E+05 2.74E+05 2.28E+05 2.24E+05 5.44E+05 6.50E+05 4.07E+05  
8.88E+07 7.94E+07 1.36E+08 9.06E+07 8.97E+07 7.69E+07 1.79E+08 2.21E+08 1.58E+08  
7.47E+05 5.84E+05 8.86E+05 9.28E+05 7.18E+05 7.59E+05 1.46E+06 1.88E+06 1.17E+06  
4.50E+05 3.22E+05 8.50E+05 4.09E+05 4.16E+05 3.56E+05 1.22E+06 2.33E+06 8.75E+05  
1.59E+06 1.29E+06 2.93E+06 1.59E+06 1.45E+06 1.17E+06 5.85E+06 1.15E+07 5.77E+06  
2.14E+07 1.54E+07 3.33E+07 1.93E+07 1.84E+07 1.73E+07 5.25E+07 8.35E+07 4.20E+07  
1.87E+06 2.73E+06 2.22E+06 3.56E+06 3.56E+06 1.30E+06 2.77E+06 1.01E+07 5.84E+06  
5.30E+06 3.22E+06 7.57E+06 5.31E+06 5.31E+06 5.09E+06 9.38E+06 1.42E+07 9.21E+06  
4.95E+07 4.37E+07 5.60E+07 4.99E+07 4.42E+07 4.47E+07 6.29E+07 8.62E+07 5.88E+07  
1.04E+06 1.25E+06 1.42E+06 9.41E+05 1.01E+06 1.22E+06 1.18E+06 1.64E+06 1.27E+06  
3.82E+04 3.60E+04 5.54E+04 2.41E+04 3.26E+04 2.09E+04 1.28E+05 2.76E+05 1.24E+05  
1.79E+06 1.29E+06 3.21E+06 1.74E+06 1.77E+06 1.34E+06 6.07E+06 1.05E+07 5.17E+06  
1.30E+06 8.70E+05 2.10E+06 9.49E+05 1.02E+06 8.82E+05 2.12E+06 4.19E+06 1.30E+06  
7.37E+07 6.01E+07 9.49E+07 6.63E+07 6.26E+07 5.74E+07 9.54E+07 1.28E+08 7.60E+07  
1.87E+06 1.57E+06 2.36E+06 1.73E+06 1.87E+06 2.02E+06 2.92E+06 3.83E+06 2.30E+06  
1.47E+08 1.36E+08 1.64E+08 1.41E+08 1.37E+08 1.32E+08 1.65E+08 2.04E+08 1.59E+08



|          |          |          |          |          |          |          |          |          |
|----------|----------|----------|----------|----------|----------|----------|----------|----------|
| 1.02E+05 | 4.85E+04 | 1.42E+05 | 7.71E+04 | 8.86E+04 | 8.90E+04 | 3.54E+05 | 6.59E+05 | 2.63E+05 |
| 1.77E+06 | 1.24E+06 | 2.49E+06 | 1.70E+06 | 1.62E+06 | 1.26E+06 | 2.76E+06 | 4.68E+06 | 2.32E+06 |
| 8.11E+05 | 5.94E+05 | 8.94E+05 | 6.15E+05 | 6.43E+05 | 5.94E+05 | 1.02E+06 | 1.37E+06 | 9.98E+05 |
| 1.64E+04 | 2.12E+04 | 1.78E+04 | 1.62E+04 | 3.19E+04 | 2.39E+04 | 9.12E+04 | 4.70E+04 | 6.84E+04 |
| 8.34E+05 | 6.68E+05 | 1.20E+06 | 9.39E+05 | 7.95E+05 | 7.51E+05 | 1.43E+06 | 2.09E+06 | 1.26E+06 |
| 6.73E+04 | 6.55E+04 | 9.42E+04 | 8.89E+04 | 6.39E+04 | 7.43E+04 | 8.36E+04 | 1.42E+05 | 1.08E+05 |
| 1.67E+05 | 1.89E+05 | 1.87E+05 | 1.31E+05 | 1.88E+05 | 1.38E+05 | 2.61E+05 | 2.81E+05 | 1.50E+05 |
| 9.24E+05 | 8.19E+05 | 1.05E+06 | 1.04E+06 | 7.96E+05 | 9.45E+05 | 1.23E+06 | 1.48E+06 | 1.10E+06 |
| 1.98E+04 | 2.89E+04 | 4.41E+04 | 3.69E+04 | 3.08E+04 | 3.13E+04 | 1.36E+04 | 2.51E+04 | 2.07E+04 |
| 1.27E+05 | 9.53E+04 | 1.18E+05 | 1.40E+05 | 1.36E+05 | 9.98E+04 | 1.55E+05 | 1.75E+05 | 1.13E+05 |
| 2.35E+06 | 2.26E+06 | 2.79E+06 | 2.97E+06 | 2.67E+06 | 2.31E+06 | 3.39E+06 | 4.14E+06 | 2.87E+06 |
| 9.00E+00 | 3.99E+04 | 5.73E+04 | 3.64E+04 | 5.29E+04 | 2.87E+04 | 8.59E+04 | 1.34E+05 | 8.08E+04 |
| 6.61E+04 | 1.33E+05 | 1.12E+05 | 1.39E+05 | 1.24E+05 | 1.04E+05 | 1.14E+05 | 1.64E+05 | 1.17E+05 |
| 3.34E+04 | 3.88E+04 | 5.04E+04 | 3.08E+04 | 4.20E+04 | 3.00E+04 | 3.53E+04 | 5.42E+04 | 4.91E+04 |
| 4.26E+04 | 2.62E+04 | 4.93E+04 | 4.78E+04 | 2.68E+04 | 3.99E+04 | 1.36E+05 | 1.79E+05 | 6.11E+04 |
| 1.74E+05 | 1.66E+05 | 2.67E+05 | 1.91E+05 | 1.75E+05 | 1.65E+05 | 2.82E+05 | 4.53E+05 | 2.54E+05 |
| 9.42E+05 | 7.98E+05 | 1.65E+06 | 1.11E+06 | 9.91E+05 | 8.71E+05 | 1.98E+06 | 2.80E+06 | 1.88E+06 |
| 4.58E+04 | 3.33E+04 | 8.06E+04 | 5.42E+04 | 6.12E+04 | 4.21E+04 | 8.50E+04 | 1.59E+05 | 7.81E+04 |
| 7.46E+04 | 6.31E+04 | 7.77E+04 | 7.93E+04 | 6.44E+04 | 7.07E+04 | 9.75E+04 | 1.55E+05 | 8.96E+04 |
| 2.60E+04 | 1.81E+04 | 4.27E+04 | 3.35E+04 | 2.87E+04 | 2.41E+04 | 4.84E+04 | 5.97E+04 | 4.18E+04 |
| 6.36E+04 | 3.11E+04 | 1.01E+05 | 6.36E+04 | 5.22E+04 | 5.35E+04 | 1.29E+05 | 2.36E+05 | 1.30E+05 |
| 1.51E+06 | 1.60E+06 | 2.11E+06 | 1.73E+06 | 1.54E+06 | 1.61E+06 | 2.01E+06 | 2.75E+06 | 2.33E+06 |
| 1.41E+05 | 1.24E+05 | 1.93E+05 | 1.51E+05 | 1.17E+05 | 1.07E+05 | 2.39E+05 | 3.19E+05 | 2.00E+05 |
| 4.56E+05 | 4.56E+05 | 5.82E+05 | 5.91E+05 | 5.55E+05 | 4.61E+05 | 6.90E+05 | 8.09E+05 | 6.75E+05 |
| 5.82E+04 | 5.14E+04 | 8.48E+04 | 6.12E+04 | 6.62E+04 | 3.75E+04 | 9.89E+04 | 1.51E+05 | 9.47E+04 |
| 2.45E+05 | 3.16E+05 | 2.69E+05 | 2.91E+05 | 1.80E+05 | 2.44E+05 | 2.90E+05 | 4.34E+05 | 3.12E+05 |
| 1.03E+05 | 1.11E+05 | 1.68E+05 | 1.32E+05 | 1.14E+05 | 1.24E+05 | 1.39E+05 | 2.54E+05 | 1.49E+05 |
| 1.98E+04 | 8.49E+03 | 1.89E+04 | 1.18E+04 | 8.99E+03 | 1.10E+04 | 2.41E+04 | 4.65E+04 | 2.14E+04 |
| 9.00E+00 | 1.33E+04 | 9.00E+00 |
| 1.64E+05 | 1.29E+05 | 7.81E+04 | 1.43E+05 | 1.47E+05 | 8.86E+04 | 2.80E+05 | 4.58E+05 | 2.64E+05 |
| 1.35E+05 | 1.17E+05 | 2.15E+05 | 1.70E+05 | 1.54E+05 | 1.36E+05 | 2.20E+05 | 3.50E+05 | 2.24E+05 |
| 3.83E+04 | 1.78E+04 | 2.36E+04 | 1.50E+04 | 2.22E+04 | 2.54E+04 | 2.96E+04 | 1.95E+04 | 3.46E+04 |
| 5.66E+04 | 5.07E+04 | 9.74E+04 | 5.74E+04 | 5.89E+04 | 4.36E+04 | 1.21E+05 | 1.61E+05 | 8.14E+04 |
| 1.26E+05 | 1.16E+05 | 1.20E+05 | 1.18E+05 | 1.23E+05 | 1.20E+05 | 1.28E+05 | 1.56E+05 | 1.24E+05 |
| 2.01E+04 | 1.82E+04 | 2.19E+04 | 1.53E+04 | 2.15E+04 | 2.04E+04 | 1.96E+04 | 2.47E+04 | 2.02E+04 |
| 6.36E+03 | 6.67E+03 | 6.19E+03 | 5.76E+03 | 6.42E+03 | 6.58E+03 | 6.81E+03 | 6.73E+03 | 6.52E+03 |
| 2.30E+04 | 2.05E+04 | 2.25E+04 | 2.35E+04 | 1.99E+04 | 1.81E+04 | 2.28E+04 | 3.64E+04 | 2.30E+04 |
| 3.54E+05 | 2.96E+05 | 3.58E+05 | 2.88E+05 | 2.95E+05 | 3.21E+05 | 3.27E+05 | 4.18E+05 | 3.61E+05 |
| 1.77E+04 | 2.13E+04 | 1.99E+04 | 1.70E+04 | 2.01E+04 | 1.82E+04 | 1.80E+04 | 2.56E+04 | 2.41E+04 |
| 7.10E+03 | 6.31E+03 | 8.62E+03 | 1.03E+04 | 1.05E+04 | 7.79E+03 | 7.90E+03 | 1.15E+04 | 7.45E+03 |
| 3.98E+05 | 3.93E+05 | 4.09E+05 | 3.59E+05 | 3.15E+05 | 4.05E+05 | 4.24E+05 | 5.27E+05 | 3.19E+05 |
| 1.08E+04 | 9.96E+03 | 9.44E+03 | 5.58E+03 | 7.29E+03 | 1.28E+04 | 1.20E+04 | 1.24E+04 | 1.35E+04 |
| 6.76E+04 | 5.84E+04 | 8.09E+04 | 5.52E+04 | 7.80E+04 | 5.65E+04 | 7.30E+04 | 9.09E+04 | 1.08E+05 |
| 2.69E+06 | 3.11E+06 | 2.80E+06 | 1.78E+06 | 2.83E+06 | 2.35E+06 | 2.93E+06 | 3.47E+06 | 3.46E+06 |
| 1.08E+05 | 1.04E+05 | 1.39E+05 | 2.49E+04 | 9.66E+04 | 8.72E+04 | 1.52E+05 | 1.60E+05 | 9.78E+04 |
| 4.92E+05 | 3.83E+05 | 5.60E+05 | 4.54E+05 | 4.95E+05 | 5.81E+05 | 5.62E+05 | 8.69E+05 | 4.20E+05 |
| 3.98E+06 | 4.41E+06 | 4.31E+06 | 3.59E+06 | 3.59E+06 | 3.95E+06 | 3.89E+06 | 4.77E+06 | 4.52E+06 |
| 3.58E+05 | 2.38E+05 | 5.74E+05 | 5.34E+05 | 7.81E+05 | 6.67E+05 | 4.28E+05 | 5.01E+05 | 1.36E+05 |
| 5.65E+05 | 7.49E+05 | 7.40E+05 | 6.19E+05 | 7.68E+05 | 7.38E+05 | 8.38E+05 | 8.86E+05 | 7.91E+05 |
| 2.42E+05 | 1.79E+05 | 2.83E+05 | 2.21E+05 | 1.78E+05 | 2.11E+05 | 4.71E+05 | 5.86E+05 | 4.04E+05 |
| 1.20E+05 | 1.42E+05 | 1.52E+05 | 9.00E+04 | 1.06E+05 | 1.31E+05 | 1.07E+05 | 1.21E+05 | 1.29E+05 |
| 4.22E+05 | 3.90E+05 | 4.01E+05 | 3.76E+05 | 3.95E+05 | 3.91E+05 | 3.68E+05 | 4.68E+05 | 4.51E+05 |
| 1.80E+06 | 2.00E+06 | 1.29E+06 | 1.79E+06 | 1.58E+06 | 1.41E+06 | 1.38E+06 | 2.59E+06 | 2.23E+06 |
| 1.67E+07 | 1.59E+07 | 1.60E+07 | 1.58E+07 | 1.78E+07 | 1.53E+07 | 1.67E+07 | 1.62E+07 | 1.85E+07 |

4.76E+05 5.87E+05 5.49E+05 6.05E+05 6.87E+05 6.10E+05 5.01E+05 4.74E+05 4.88E+05  
8.80E+04 7.87E+04 7.47E+04 8.05E+04 6.78E+04 8.64E+04 8.86E+04 6.85E+04 8.28E+04  
1.68E+04 2.91E+04 1.84E+04 1.51E+04 2.20E+04 2.82E+04 1.24E+04 2.20E+04 3.00E+04  
9.10E+04 1.09E+05 1.58E+05 9.30E+04 9.67E+04 8.99E+04 8.71E+04 1.01E+05 1.04E+05  
4.19E+05 5.08E+05 1.32E+05 5.49E+04 3.98E+04 5.34E+05 2.78E+05 3.03E+05 3.47E+05  
1.55E+04 1.39E+04 2.37E+04 2.85E+04 1.06E+04 1.94E+04 5.46E+03 1.59E+04 1.50E+04  
8.89E+03 1.57E+04 1.66E+04 8.04E+03 4.62E+04 2.05E+04 4.94E+03 2.07E+04 2.04E+03  
3.13E+05 2.54E+05 1.64E+05 2.90E+05 2.74E+05 3.31E+05 2.13E+05 2.77E+05 3.18E+05  
4.84E+04 5.20E+04 5.98E+04 2.55E+04 3.86E+04 4.02E+04 5.22E+04 6.02E+04 6.03E+04  
4.51E+04 4.42E+04 3.98E+04 4.60E+04 4.39E+04 4.09E+04 4.84E+04 4.75E+04 2.24E+04  
1.15E+04 7.81E+03 7.62E+03 6.79E+03 4.38E+03 9.07E+03 7.59E+03 2.48E+04 8.37E+03  
3.01E+06 3.06E+06 3.73E+06 2.93E+06 3.22E+06 2.79E+06 2.95E+06 3.85E+06 3.40E+06  
1.03E+05 1.11E+05 2.27E+05 1.44E+05 1.38E+05 1.54E+05 1.69E+05 1.88E+05 1.49E+05  
9.00E+00 9.00E+00 9.00E+00 9.00E+00 9.00E+00 9.00E+00 3.36E+03 3.36E+03 1.08E+03  
3.17E+04 5.73E+04 5.07E+04 3.22E+04 3.14E+04 3.07E+04 3.63E+04 5.63E+04 5.23E+04  
1.39E+05 1.72E+05 1.96E+05 1.16E+05 1.59E+05 1.44E+05 1.88E+05 2.51E+05 2.09E+05  
6.49E+06 6.54E+06 8.14E+06 7.28E+06 6.58E+06 6.52E+06 6.84E+06 9.02E+06 8.46E+06  
5.67E+05 5.97E+05 6.70E+05 4.35E+05 4.51E+05 4.68E+05 6.68E+05 7.03E+05 7.67E+05  
4.69E+03 1.25E+04 2.93E+04 1.55E+04 3.31E+04 2.73E+04 2.21E+04 3.17E+04 2.83E+04  
4.22E+07 3.91E+07 4.90E+07 4.15E+07 4.22E+07 4.13E+07 4.06E+07 5.21E+07 4.42E+07  
3.21E+04 4.62E+04 6.45E+04 6.54E+04 4.53E+04 5.76E+04 5.69E+04 5.72E+04 4.75E+04  
1.78E+06 1.86E+06 2.18E+06 2.09E+06 1.63E+06 1.96E+06 2.11E+06 2.02E+06 2.02E+06  
3.52E+06 3.95E+06 3.62E+06 3.74E+06 3.39E+06 3.81E+06 3.54E+06 4.31E+06 4.51E+06  
1.29E+05 1.13E+05 2.28E+05 1.45E+05 1.24E+05 1.94E+05 1.25E+05 1.36E+05 1.13E+05  
1.23E+06 1.27E+06 1.10E+06 1.32E+06 1.36E+06 1.24E+06 1.00E+06 1.22E+06 1.18E+06  
9.00E+00 9.00E+00 4.45E+04 9.00E+00 9.00E+00 9.00E+00 2.98E+04 4.40E+04 5.32E+04  
4.47E+04 3.94E+04 5.36E+04 4.83E+04 3.41E+04 3.10E+04 5.72E+04 7.03E+04 4.73E+04  
2.32E+03 9.00E+00 6.82E+03 9.00E+00 9.00E+00 9.00E+00 2.89E+03 3.34E+03 2.57E+03  
3.17E+04 2.94E+04 3.13E+04 4.25E+04 3.37E+04 2.33E+04 3.93E+04 3.22E+04 3.20E+04  
2.98E+04 4.27E+04 5.18E+04 1.29E+04 3.41E+04 4.69E+04 3.08E+04 4.32E+04 3.84E+04  
1.34E+04 1.48E+04 1.29E+04 1.12E+04 1.18E+04 1.29E+04 1.31E+04 1.47E+04 1.21E+04  
2.19E+04 1.91E+04 2.54E+04 1.69E+04 4.66E+04 3.79E+04 2.82E+04 3.54E+04 2.95E+04  
2.01E+04 4.10E+04 4.82E+04 2.15E+04 2.51E+04 5.31E+04 1.87E+04 4.08E+04 1.13E+04  
6.18E+02 1.98E+03 1.67E+03 1.36E+03 3.00E+03 4.05E+03 7.20E+02 1.21E+03 9.00E+00  
6.87E+03 9.15E+03 1.22E+04 1.04E+04 1.02E+04 1.26E+04 1.11E+04 1.30E+04 4.06E+03  
1.63E+04 2.53E+04 3.33E+04 3.71E+04 2.17E+04 3.87E+04 2.54E+04 2.53E+04 2.61E+04  
8.04E+03 1.33E+04 1.23E+04 1.20E+04 1.70E+04 2.25E+04 1.33E+04 1.80E+04 1.39E+04  
1.81E+05 1.83E+05 3.21E+05 1.87E+05 1.72E+05 1.84E+05 2.33E+05 2.76E+05 2.30E+05  
6.10E+04 5.21E+04 8.95E+04 8.64E+04 5.87E+04 8.23E+04 9.21E+04 1.04E+05 7.32E+04  
5.37E+05 6.86E+05 4.35E+05 3.72E+05 3.35E+05 3.68E+05 3.13E+05 5.83E+05 3.99E+05  
7.78E+04 1.63E+05 1.23E+05 8.90E+04 1.18E+05 1.03E+05 1.18E+05 1.11E+05 1.05E+05  
4.16E+04 2.58E+04 4.28E+04 3.95E+04 4.16E+04 3.40E+04 2.82E+04 4.87E+04 3.88E+04  
4.33E+05 4.04E+05 3.89E+05 2.94E+05 2.60E+05 4.19E+05 2.97E+05 2.65E+05 4.37E+05  
1.58E+04 2.22E+04 2.03E+04 3.65E+04 3.24E+04 2.77E+04 2.33E+04 2.41E+04 2.69E+04  
1.25E+04 1.64E+04 1.02E+04 1.24E+04 4.41E+03 1.51E+04 1.30E+04 2.06E+04 2.27E+04  
1.75E+05 2.27E+05 1.52E+05 1.61E+05 1.99E+05 1.74E+05 1.88E+05 1.46E+05 2.14E+05  
4.28E+03 5.58E+03 6.50E+03 4.26E+03 5.58E+03 4.67E+03 4.52E+03 5.27E+03 1.58E+03  
6.47E+03 9.00E+00 6.38E+03 9.91E+03 5.94E+03 9.00E+00 1.06E+04 1.42E+04 7.29E+03  
1.01E+05 1.23E+05 1.18E+05 1.15E+05 1.07E+05 1.54E+05 1.62E+05 1.90E+05 1.59E+05  
5.28E+05 6.28E+05 7.36E+05 7.61E+05 5.49E+05 1.17E+06 8.32E+05 1.09E+06 6.90E+05  
2.27E+06 2.41E+06 2.40E+06 2.31E+06 2.39E+06 2.31E+06 2.68E+06 2.87E+06 2.64E+06  
2.18E+04 6.09E+04 4.21E+04 4.37E+04 4.86E+04 4.06E+04 5.61E+04 6.24E+04 5.17E+04  
1.31E+06 1.39E+06 1.50E+06 1.35E+06 1.42E+06 1.33E+06 1.31E+06 1.23E+06 1.36E+06  
4.24E+03 1.26E+04 8.36E+03 5.88E+03 7.99E+02 3.19E+03 4.22E+03 7.66E+03 4.02E+03

|          |          |          |          |          |          |          |          |          |
|----------|----------|----------|----------|----------|----------|----------|----------|----------|
| 3.27E+04 | 3.39E+04 | 4.08E+04 | 2.76E+04 | 3.75E+04 | 3.22E+04 | 3.00E+04 | 3.17E+04 | 2.42E+04 |
| 2.63E+05 | 3.65E+05 | 2.93E+05 | 3.18E+05 | 1.99E+05 | 2.53E+05 | 2.33E+05 | 2.68E+05 | 3.33E+05 |
| 1.05E+04 | 2.44E+04 | 1.92E+04 | 1.39E+04 | 1.52E+04 | 2.23E+04 | 1.79E+04 | 1.86E+04 | 1.22E+04 |
| 8.04E+03 | 8.18E+03 | 5.70E+03 | 8.17E+02 | 4.09E+03 | 8.11E+03 | 4.09E+03 | 4.90E+03 | 4.83E+03 |
| 2.22E+05 | 2.36E+05 | 3.42E+05 | 2.52E+05 | 2.03E+05 | 4.25E+05 | 3.42E+05 | 4.03E+05 | 2.79E+05 |
| 6.17E+06 | 7.60E+06 | 8.69E+06 | 7.82E+06 | 6.86E+06 | 1.12E+07 | 9.30E+06 | 1.10E+07 | 7.98E+06 |
| 7.09E+04 | 9.86E+04 | 1.05E+05 | 7.23E+04 | 6.98E+04 | 7.88E+04 | 9.20E+04 | 9.48E+04 | 1.03E+05 |
| 5.45E+03 | 6.82E+03 | 5.88E+03 | 5.80E+03 | 4.77E+03 | 4.21E+03 | 4.30E+03 | 6.88E+03 | 5.40E+03 |
| 9.00E+00 | 9.00E+00 | 9.00E+00 | 9.00E+00 | 9.00E+00 | 2.75E+03 | 1.90E+03 | 2.88E+03 | 2.58E+03 |
| 7.28E+03 | 1.11E+04 | 1.17E+04 | 7.99E+03 | 1.16E+04 | 1.19E+04 | 1.05E+04 | 9.30E+03 | 1.10E+04 |
| 2.42E+03 | 2.78E+03 | 3.46E+03 | 3.49E+03 | 2.52E+03 | 3.18E+03 | 2.04E+03 | 2.60E+03 | 2.29E+03 |
| 1.54E+04 | 2.51E+04 | 2.51E+04 | 1.56E+04 | 1.88E+04 | 2.51E+04 | 1.81E+04 | 2.16E+04 | 2.21E+04 |
| 8.05E+03 | 8.68E+03 | 9.54E+03 | 8.60E+03 | 1.00E+04 | 9.23E+03 | 7.65E+03 | 9.25E+03 | 7.45E+03 |
| 5.13E+03 | 4.20E+03 | 5.47E+03 | 3.81E+03 | 4.18E+03 | 4.27E+03 | 3.94E+03 | 4.67E+03 | 5.55E+03 |
| 2.36E+03 | 1.88E+03 | 3.17E+03 | 2.24E+03 | 1.95E+03 | 2.42E+03 | 2.67E+03 | 2.64E+03 | 2.49E+03 |
| 6.93E+02 | 5.75E+02 | 6.21E+02 | 9.00E+00 | 5.55E+02 | 7.68E+02 | 9.00E+00 | 1.31E+03 | 9.00E+00 |
| 1.25E+04 | 8.58E+03 | 1.49E+04 | 9.96E+03 | 9.64E+03 | 1.13E+04 | 9.77E+03 | 9.33E+03 | 1.09E+04 |
| 1.68E+05 | 2.25E+05 | 1.88E+05 | 2.51E+05 | 2.27E+05 | 2.19E+05 | 1.84E+05 | 2.82E+05 | 1.85E+05 |
| 2.35E+04 | 2.35E+04 | 2.77E+04 | 2.52E+04 | 2.36E+04 | 2.36E+04 | 2.28E+04 | 2.76E+04 | 2.37E+04 |
| 1.14E+04 | 2.45E+04 | 1.40E+04 | 1.87E+04 | 1.92E+04 | 1.61E+04 | 1.60E+04 | 2.34E+03 | 1.03E+04 |
| 1.26E+04 | 1.60E+04 | 1.17E+04 | 9.72E+03 | 8.50E+03 | 1.31E+04 | 6.68E+03 | 2.31E+04 | 1.55E+04 |
| 2.57E+04 | 1.87E+04 | 3.78E+04 | 6.36E+04 | 3.67E+04 | 5.52E+04 | 6.95E+04 | 4.44E+04 | 2.90E+04 |
| 5.68E+03 | 1.09E+03 | 5.69E+03 | 8.48E+03 | 2.16E+03 | 5.01E+03 | 7.07E+03 | 3.22E+03 | 3.61E+03 |
| 9.00E+00 | 1.25E+04 | 9.00E+00 | 9.00E+00 | 9.00E+00 | 2.04E+04 | 9.00E+00 | 9.00E+00 | 9.00E+00 |
| 4.37E+04 | 3.74E+04 | 5.75E+04 | 2.47E+04 | 4.45E+04 | 4.25E+04 | 4.62E+04 | 5.87E+04 | 3.54E+04 |
| 9.00E+00 | 1.99E+03 | 9.00E+00 | 2.92E+03 | 9.00E+00 | 9.00E+00 | 3.04E+03 | 4.16E+03 | 8.42E+02 |
| 9.00E+00 | 9.00E+00 | 9.00E+00 | 9.00E+00 | 4.28E+03 | 9.00E+00 | 7.18E+03 | 9.49E+03 | 8.10E+03 |
| 3.75E+04 | 1.31E+05 | 1.82E+05 | 5.41E+04 | 6.59E+04 | 1.01E+05 | 1.77E+05 | 1.62E+05 | 1.36E+05 |
| 2.67E+04 | 1.95E+04 | 2.64E+04 | 2.65E+04 | 2.03E+04 | 1.29E+04 | 2.65E+04 | 3.00E+04 | 1.94E+04 |
| 2.20E+04 | 3.08E+04 | 3.20E+04 | 3.20E+04 | 2.57E+04 | 5.22E+04 | 3.38E+04 | 4.96E+04 | 2.90E+04 |
| 1.67E+05 | 1.97E+05 | 1.99E+05 | 1.78E+05 | 1.53E+05 | 1.86E+05 | 2.20E+05 | 2.28E+05 | 2.14E+05 |
| 2.63E+03 | 6.18E+03 | 5.53E+03 | 5.56E+03 | 6.59E+03 | 7.51E+03 | 4.87E+03 | 4.26E+03 | 4.00E+03 |
| 1.50E+05 | 1.91E+05 | 1.50E+05 | 2.11E+05 | 8.60E+04 | 2.34E+05 | 2.16E+05 | 3.01E+05 | 2.32E+05 |
| 2.08E+04 | 2.34E+04 | 2.39E+04 | 1.95E+04 | 2.49E+04 | 2.40E+04 | 2.58E+04 | 2.93E+04 | 2.55E+04 |
| 1.52E+05 | 1.67E+05 | 1.86E+05 | 1.86E+05 | 1.75E+05 | 1.71E+05 | 1.57E+05 | 1.78E+05 | 1.90E+05 |
| 2.13E+05 | 2.18E+05 | 2.30E+05 | 2.01E+05 | 2.40E+05 | 2.68E+05 | 1.87E+05 | 1.49E+05 | 2.21E+05 |
| 9.00E+00 | 1.45E+04 | 9.00E+00 | 9.00E+00 | 1.77E+04 | 9.00E+00 | 2.00E+04 | 2.76E+04 | 2.09E+04 |
| 2.59E+05 | 1.79E+05 | 3.27E+05 | 1.88E+05 | 2.89E+05 | 2.23E+05 | 2.25E+05 | 3.83E+05 | 2.79E+05 |
| 9.39E+04 | 1.25E+05 | 9.40E+04 | 8.37E+04 | 5.98E+04 | 9.76E+04 | 7.35E+04 | 9.92E+04 | 1.21E+05 |
| 1.39E+06 | 1.35E+06 | 1.85E+06 | 1.68E+06 | 1.71E+06 | 1.38E+06 | 1.43E+06 | 1.61E+06 | 1.51E+06 |
| 9.00E+00 | 9.00E+00 | 9.00E+00 | 9.00E+00 | 9.00E+00 | 9.00E+00 | 1.23E+04 | 9.00E+00 | 9.00E+00 |
| 7.61E+05 | 7.10E+05 | 7.97E+05 | 7.22E+05 | 8.27E+05 | 7.26E+05 | 7.13E+05 | 1.05E+06 | 8.06E+05 |
| 5.72E+03 | 2.40E+03 | 3.32E+03 | 3.60E+03 | 4.61E+03 | 1.68E+03 | 1.72E+03 | 4.32E+03 | 1.64E+03 |
| 2.67E+04 | 1.57E+04 | 3.65E+04 | 2.50E+04 | 1.67E+04 | 4.59E+03 | 6.42E+03 | 4.07E+04 | 1.66E+04 |
| 2.73E+04 | 2.32E+04 | 2.41E+04 | 2.25E+04 | 2.76E+04 | 2.67E+04 | 2.44E+04 | 3.07E+04 | 2.34E+04 |
| 3.19E+05 | 2.65E+05 | 3.16E+05 | 3.23E+05 | 2.68E+05 | 3.02E+05 | 3.39E+05 | 3.93E+05 | 3.47E+05 |
| 2.73E+04 | 2.23E+04 | 3.53E+04 | 2.58E+04 | 2.94E+04 | 1.52E+04 | 2.27E+04 | 4.15E+04 | 2.13E+04 |
| 1.55E+05 | 1.68E+05 | 2.37E+05 | 2.59E+05 | 1.94E+05 | 1.59E+05 | 2.38E+05 | 1.86E+05 | 1.82E+05 |
| 3.62E+05 | 3.29E+05 | 3.96E+05 | 3.89E+05 | 3.51E+05 | 4.31E+05 | 3.37E+05 | 2.82E+05 | 4.03E+05 |
| 8.60E+02 | 1.84E+03 | 2.81E+03 | 9.00E+03 | 8.91E+03 | 4.53E+03 | 2.73E+03 | 6.18E+03 | 2.63E+03 |
| 3.96E+04 | 4.58E+04 | 5.72E+04 | 2.47E+04 | 3.73E+04 | 5.12E+04 | 4.64E+04 | 6.29E+04 | 4.60E+04 |
| 6.11E+03 | 4.55E+03 | 6.15E+03 | 4.73E+03 | 4.81E+03 | 5.89E+03 | 6.77E+03 | 6.37E+03 | 6.11E+03 |
| 1.45E+04 | 1.06E+04 | 1.51E+04 | 1.26E+04 | 1.11E+04 | 1.10E+04 | 8.50E+03 | 1.12E+04 | 1.07E+04 |
| 7.70E+04 | 9.60E+04 | 8.71E+04 | 5.86E+04 | 9.88E+04 | 7.88E+04 | 9.00E+00 | 1.09E+05 | 9.00E+00 |

|          |          |          |          |          |          |          |          |          |
|----------|----------|----------|----------|----------|----------|----------|----------|----------|
| 3.90E+05 | 3.02E+05 | 4.48E+05 | 3.98E+05 | 3.19E+05 | 2.89E+05 | 4.29E+05 | 5.38E+05 | 4.06E+05 |
| 6.43E+04 | 9.25E+04 | 1.18E+05 | 7.73E+04 | 9.15E+04 | 1.20E+05 | 9.80E+04 | 1.42E+05 | 7.88E+04 |
| 8.84E+05 | 1.18E+06 | 1.46E+06 | 1.08E+06 | 1.01E+06 | 1.38E+06 | 1.17E+06 | 1.18E+06 | 1.02E+06 |
| 5.21E+05 | 6.59E+05 | 5.37E+05 | 3.24E+05 | 7.11E+05 | 8.03E+05 | 6.01E+05 | 3.63E+05 | 5.31E+05 |
| 6.22E+04 | 6.51E+04 | 7.23E+04 | 6.22E+04 | 6.71E+04 | 6.22E+04 | 5.72E+04 | 6.06E+04 | 6.03E+04 |
| 1.60E+04 | 1.82E+04 | 4.78E+03 | 1.94E+04 | 1.84E+04 | 1.92E+04 | 2.56E+04 | 4.04E+04 | 1.97E+04 |
| 2.53E+06 | 2.07E+06 | 2.50E+06 | 2.46E+06 | 2.18E+06 | 2.31E+06 | 2.13E+06 | 2.59E+06 | 2.41E+06 |
| 1.49E+07 | 1.40E+07 | 1.55E+07 | 1.27E+07 | 1.26E+07 | 1.42E+07 | 1.45E+07 | 1.62E+07 | 1.48E+07 |
| 9.33E+03 | 1.87E+04 | 2.04E+04 | 3.44E+03 | 6.73E+03 | 1.27E+04 | 6.78E+03 | 1.79E+04 | 4.24E+03 |
| 8.34E+04 | 6.43E+04 | 8.67E+04 | 3.91E+04 | 7.00E+04 | 5.40E+04 | 7.77E+04 | 3.39E+04 | 8.40E+04 |
| 6.00E+03 | 8.99E+03 | 1.19E+04 | 8.07E+03 | 4.95E+03 | 5.97E+03 | 3.09E+03 | 1.10E+04 | 3.01E+03 |
| 3.07E+04 | 4.51E+04 | 6.22E+04 | 4.94E+04 | 6.16E+04 | 5.31E+04 | 3.26E+04 | 6.32E+04 | 4.79E+04 |
| 1.10E+05 | 9.69E+04 | 1.43E+05 | 8.15E+04 | 4.11E+04 | 1.05E+05 | 1.24E+05 | 1.83E+05 | 1.40E+05 |
| 9.00E+00 | 9.00E+00 | 9.00E+00 | 7.40E+03 | 7.37E+03 | 9.00E+00 | 9.00E+00 | 9.00E+00 | 9.00E+00 |
| 1.43E+06 | 1.36E+06 | 1.50E+06 | 1.70E+06 | 1.34E+06 | 1.31E+06 | 1.49E+06 | 1.97E+06 | 1.43E+06 |
| 5.88E+03 | 7.43E+03 | 4.86E+03 | 3.10E+03 | 6.64E+03 | 5.61E+03 | 4.08E+03 | 8.49E+03 | 3.06E+03 |
| 1.79E+04 | 1.14E+04 | 2.34E+04 | 1.69E+04 | 2.63E+04 | 2.38E+04 | 2.45E+04 | 2.38E+04 | 2.30E+04 |
| 8.60E+03 | 4.51E+03 | 1.71E+04 | 5.18E+03 | 1.34E+04 | 6.58E+03 | 5.91E+03 | 8.65E+03 | 6.58E+03 |
| 4.45E+03 | 8.19E+03 | 1.41E+04 | 1.18E+04 | 1.35E+04 | 1.16E+04 | 1.09E+04 | 1.45E+04 | 6.64E+03 |
| 9.00E+00 |
| 4.02E+03 | 9.50E+03 | 1.79E+03 | 1.24E+04 | 9.66E+03 | 1.08E+04 | 5.93E+03 | 5.83E+03 | 2.67E+03 |
| 2.38E+04 | 2.57E+04 | 2.27E+04 | 2.59E+04 | 4.82E+04 | 3.75E+04 | 2.72E+04 | 3.24E+04 | 2.95E+04 |
| 2.37E+04 | 5.32E+04 | 2.16E+04 | 5.24E+04 | 5.15E+04 | 4.20E+04 | 4.59E+04 | 3.77E+04 | 5.85E+04 |
| 7.87E+03 | 2.95E+03 | 9.81E+03 | 2.97E+03 | 3.93E+03 | 3.91E+03 | 1.10E+04 | 7.82E+03 | 7.86E+03 |
| 2.97E+05 | 2.08E+05 | 3.92E+05 | 3.04E+05 | 2.53E+05 | 3.00E+05 | 3.17E+05 | 3.13E+05 | 3.18E+05 |
| 4.11E+04 | 9.00E+00 | 5.71E+04 | 9.00E+00 | 4.84E+04 | 9.00E+00 | 2.85E+04 | 9.00E+00 | 4.90E+04 |
| 9.00E+00 | 6.22E+03 | 9.00E+00 |
| 4.21E+04 | 4.61E+04 | 5.34E+04 | 7.02E+04 | 4.66E+04 | 5.20E+04 | 5.28E+04 | 6.25E+04 | 5.32E+04 |
| 6.85E+05 | 5.45E+05 | 6.60E+05 | 6.16E+05 | 6.32E+05 | 5.63E+05 | 6.87E+05 | 8.98E+05 | 6.12E+05 |
| 1.81E+04 | 1.92E+04 | 3.61E+04 | 1.94E+04 | 4.04E+04 | 3.62E+04 | 3.07E+04 | 6.45E+04 | 3.53E+04 |
| 3.47E+04 | 3.86E+04 | 4.62E+04 | 5.65E+04 | 3.77E+04 | 3.50E+04 | 3.23E+04 | 5.42E+04 | 3.60E+04 |
| 2.87E+04 | 1.91E+04 | 3.53E+04 | 2.94E+04 | 1.92E+04 | 2.75E+04 | 2.56E+04 | 4.26E+04 | 3.16E+04 |
| 1.70E+05 | 1.08E+05 | 1.91E+05 | 1.48E+05 | 1.65E+05 | 1.55E+05 | 5.68E+05 | 2.61E+05 | 9.78E+04 |
| 7.34E+04 | 4.56E+04 | 8.92E+04 | 5.10E+04 | 1.20E+05 | 1.00E+05 | 3.63E+05 | 1.48E+05 | 6.79E+04 |
| 9.00E+00 | 9.00E+00 | 9.00E+00 | 9.00E+00 | 9.00E+00 | 3.60E+04 | 9.00E+00 | 9.00E+00 | 9.00E+00 |
| 4.00E+04 | 1.17E+04 | 5.60E+04 | 6.38E+04 | 7.06E+04 | 5.36E+04 | 1.72E+05 | 7.47E+04 | 5.02E+04 |
| 1.11E+04 | 5.88E+03 | 1.96E+04 | 1.84E+04 | 5.52E+03 | 1.48E+04 | 1.42E+04 | 1.80E+04 | 1.21E+04 |
| 1.60E+03 | 2.72E+03 | 4.10E+03 | 2.06E+03 | 1.58E+03 | 3.73E+03 | 2.50E+03 | 4.73E+03 | 2.43E+03 |
| 4.62E+03 | 3.45E+03 | 4.13E+03 | 5.00E+03 | 3.92E+03 | 3.86E+03 | 4.29E+03 | 6.04E+03 | 3.94E+03 |
| 7.56E+04 | 6.75E+04 | 8.87E+04 | 7.28E+04 | 7.57E+04 | 7.29E+04 | 7.24E+04 | 9.52E+04 | 8.72E+04 |
| 7.80E+03 | 1.01E+04 | 9.27E+03 | 8.03E+03 | 1.03E+04 | 8.90E+03 | 1.04E+04 | 1.03E+04 | 8.45E+03 |
| 6.57E+03 | 1.41E+04 | 1.38E+04 | 1.28E+04 | 1.21E+04 | 7.53E+03 | 1.46E+04 | 1.41E+04 | 2.09E+04 |
| 1.42E+04 | 1.74E+04 | 1.66E+04 | 1.90E+04 | 1.74E+04 | 7.07E+03 | 2.24E+04 | 2.67E+04 | 2.17E+04 |
| 3.79E+04 | 4.21E+04 | 4.67E+04 | 4.90E+04 | 2.34E+04 | 2.74E+04 | 6.23E+04 | 4.97E+04 | 6.58E+04 |
| 8.06E+04 | 6.00E+04 | 8.86E+04 | 4.93E+04 | 7.22E+04 | 7.63E+04 | 8.75E+04 | 1.28E+05 | 6.67E+04 |
| 2.28E+03 | 9.20E+03 | 1.55E+04 | 1.51E+04 | 1.14E+04 | 1.15E+04 | 6.19E+03 | 9.02E+03 | 8.36E+03 |
| 6.06E+04 | 7.65E+04 | 4.24E+04 | 8.11E+04 | 8.52E+04 | 7.46E+04 | 8.10E+04 | 8.41E+04 | 8.18E+04 |
| 4.49E+04 | 4.20E+04 | 5.54E+04 | 2.93E+04 | 4.70E+04 | 5.82E+04 | 3.76E+04 | 6.08E+04 | 2.53E+04 |
| 1.48E+05 | 2.97E+05 | 2.06E+05 | 1.92E+05 | 2.51E+05 | 2.52E+05 | 2.76E+05 | 1.67E+05 | 1.76E+05 |
| 2.34E+05 | 2.07E+05 | 4.90E+04 | 1.89E+05 | 2.41E+05 | 1.87E+05 | 2.24E+05 | 2.09E+05 | 2.00E+05 |
| 4.03E+04 | 2.85E+04 | 5.27E+04 | 1.14E+04 | 4.54E+04 | 1.84E+04 | 3.86E+04 | 4.57E+04 | 4.68E+04 |
| 8.06E+04 | 8.77E+04 | 1.09E+05 | 1.11E+05 | 1.07E+05 | 6.78E+04 | 9.29E+04 | 1.26E+05 | 1.25E+05 |
| 2.06E+04 | 3.00E+04 | 2.26E+04 | 9.00E+00 | 9.00E+00 | 7.15E+04 | 5.10E+04 | 3.87E+04 | 9.00E+00 |
| 2.22E+06 | 2.35E+06 | 2.56E+06 | 2.08E+06 | 2.27E+06 | 2.28E+06 | 2.36E+06 | 2.67E+06 | 2.43E+06 |



|          |          |          |          |          |          |          |          |          |
|----------|----------|----------|----------|----------|----------|----------|----------|----------|
| 1.01E+05 | 8.58E+04 | 9.03E+04 | 9.00E+04 | 8.20E+04 | 8.83E+04 | 7.24E+04 | 1.04E+05 | 7.06E+04 |
| 9.63E+04 | 9.52E+04 | 7.51E+04 | 7.50E+04 | 7.16E+04 | 5.21E+04 | 6.77E+04 | 6.33E+04 | 8.41E+04 |
| 1.59E+06 | 1.43E+06 | 1.66E+06 | 1.55E+06 | 1.56E+06 | 1.28E+06 | 1.52E+06 | 1.95E+06 | 1.48E+06 |
| 5.22E+04 | 3.19E+04 | 4.36E+04 | 3.40E+04 | 4.44E+04 | 4.58E+04 | 3.55E+04 | 4.38E+04 | 4.37E+04 |
| 6.16E+05 | 6.63E+05 | 5.85E+05 | 7.22E+05 | 5.86E+05 | 6.46E+05 | 5.91E+05 | 6.19E+05 | 6.50E+05 |
| 1.12E+04 | 1.97E+04 | 1.87E+04 | 1.77E+04 | 6.58E+03 | 1.68E+04 | 7.53E+03 | 1.42E+04 | 9.38E+03 |
| 1.09E+05 | 1.14E+05 | 1.23E+05 | 1.03E+05 | 1.19E+05 | 1.52E+05 | 1.18E+05 | 1.35E+05 | 1.36E+05 |
| 1.67E+04 | 2.46E+04 | 3.30E+04 | 2.26E+04 | 4.02E+04 | 2.33E+04 | 2.06E+04 | 2.44E+04 | 2.54E+04 |
| 4.45E+04 | 4.32E+04 | 2.16E+04 | 4.58E+04 | 4.51E+04 | 5.33E+04 | 1.95E+04 | 5.72E+04 | 5.28E+04 |
| 9.00E+00 | 9.00E+00 | 9.00E+00 | 9.00E+00 | 9.00E+00 | 1.91E+04 | 1.19E+04 | 8.32E+03 | 7.50E+03 |
| 1.28E+04 | 8.52E+03 | 1.17E+04 | 1.06E+04 | 2.12E+03 | 5.37E+03 | 2.15E+03 | 6.29E+03 | 8.51E+03 |
| 7.68E+05 | 9.15E+05 | 6.92E+05 | 8.21E+05 | 1.80E+05 | 8.35E+05 | 7.61E+05 | 5.99E+05 | 7.09E+05 |
| 6.60E+03 | 1.01E+04 | 2.87E+04 | 9.13E+03 | 8.04E+03 | 2.21E+04 | 6.27E+03 | 2.33E+04 | 5.61E+03 |
| 5.17E+05 | 5.86E+05 | 5.72E+05 | 5.68E+05 | 5.75E+05 | 6.20E+05 | 5.17E+05 | 4.90E+05 | 5.51E+05 |
| 2.83E+05 | 2.99E+05 | 2.45E+05 | 3.12E+05 | 2.42E+05 | 2.69E+05 | 2.75E+05 | 3.17E+05 | 3.00E+05 |
| 1.04E+06 | 9.00E+05 | 9.88E+05 | 9.50E+05 | 7.04E+05 | 6.79E+05 | 1.24E+06 | 1.37E+06 | 8.70E+05 |
| 9.00E+00 |
| 9.00E+00 | 9.00E+00 | 3.55E+03 | 9.00E+00 | 9.00E+00 | 9.00E+00 | 9.00E+00 | 9.00E+00 | 9.00E+00 |
| 9.00E+00 | 9.00E+00 | 9.00E+00 | 9.00E+00 | 9.00E+00 | 9.00E+00 | 4.19E+03 | 9.00E+00 | 9.00E+00 |
| 1.38E+07 | 1.32E+07 | 1.06E+07 | 1.13E+07 | 1.27E+07 | 1.28E+07 | 1.09E+07 | 1.05E+07 | 1.08E+07 |
| 4.18E+06 | 3.35E+06 | 5.64E+06 | 4.40E+06 | 4.06E+06 | 3.70E+06 | 7.66E+06 | 1.24E+07 | 7.90E+06 |
| 6.51E+04 | 1.04E+05 | 1.20E+05 | 6.70E+04 | 4.41E+04 | 9.31E+04 | 3.57E+04 | 7.05E+04 | 5.35E+04 |
| 1.17E+05 | 2.05E+05 | 1.50E+05 | 8.44E+04 | 1.22E+05 | 1.23E+05 | 6.83E+04 | 1.25E+05 | 9.73E+04 |
| 2.53E+07 | 2.48E+07 | 2.81E+07 | 2.52E+07 | 2.56E+07 | 2.57E+07 | 2.58E+07 | 3.14E+07 | 2.94E+07 |
| 1.07E+06 | 1.16E+06 | 1.34E+06 | 9.22E+05 | 1.11E+06 | 9.99E+05 | 9.00E+00 | 9.00E+00 | 1.40E+06 |
| 4.11E+05 | 5.07E+05 | 7.85E+05 | 5.35E+05 | 4.92E+05 | 5.36E+05 | 7.55E+05 | 1.04E+06 | 5.55E+05 |
| 6.05E+03 | 1.32E+04 | 1.65E+04 | 6.50E+03 | 1.20E+04 | 1.53E+04 | 1.80E+04 | 2.66E+04 | 1.63E+04 |
| 2.68E+03 | 1.81E+04 | 9.27E+03 | 4.90E+03 | 1.23E+04 | 8.86E+03 | 7.97E+03 | 1.15E+04 | 8.86E+03 |
| 3.71E+05 | 9.41E+05 | 1.03E+06 | 4.14E+05 | 4.31E+05 | 6.18E+05 | 2.87E+05 | 4.89E+05 | 3.79E+05 |
| 6.79E+05 | 9.59E+05 | 9.99E+05 | 6.23E+05 | 6.87E+05 | 6.26E+05 | 6.45E+05 | 9.11E+05 | 6.85E+05 |
| 6.17E+03 | 1.27E+04 | 1.93E+04 | 1.05E+04 | 3.55E+03 | 2.11E+04 | 1.75E+03 | 2.24E+04 | 9.67E+03 |
| 7.65E+06 | 8.72E+06 | 1.08E+07 | 8.26E+06 | 7.65E+06 | 7.85E+06 | 9.24E+06 | 1.15E+07 | 9.49E+06 |
| 6.59E+04 | 3.34E+04 | 9.68E+04 | 3.09E+04 | 3.02E+04 | 6.80E+04 | 7.62E+04 | 4.94E+04 | 3.78E+04 |
| 6.17E+06 | 7.06E+06 | 6.99E+06 | 5.72E+06 | 6.67E+06 | 6.26E+06 | 7.04E+06 | 8.02E+06 | 6.78E+06 |
| 7.21E+05 | 6.71E+05 | 6.65E+05 | 6.25E+05 | 5.89E+05 | 7.05E+05 | 9.03E+05 | 1.10E+06 | 7.20E+05 |
| 1.28E+07 | 1.20E+07 | 1.54E+07 | 1.21E+07 | 1.21E+07 | 1.16E+07 | 1.58E+07 | 2.03E+07 | 1.55E+07 |
| 3.20E+04 | 5.93E+04 | 5.12E+04 | 4.45E+04 | 4.09E+04 | 5.68E+04 | 8.33E+04 | 6.73E+04 | 6.86E+04 |
| 7.46E+05 | 8.82E+05 | 6.07E+05 | 6.78E+05 | 7.64E+05 | 8.20E+05 | 7.30E+05 | 9.50E+05 | 8.16E+05 |
| 1.31E+06 | 4.72E+06 | 6.12E+06 | 1.23E+06 | 1.37E+06 | 5.72E+06 | 1.46E+06 | 4.61E+06 | 1.94E+06 |
| 3.20E+06 | 3.22E+06 | 4.73E+06 | 3.36E+06 | 3.01E+06 | 3.27E+06 | 5.10E+06 | 7.20E+06 | 4.51E+06 |
| 3.01E+06 | 2.89E+06 | 4.03E+06 | 3.28E+06 | 2.87E+06 | 2.90E+06 | 5.35E+06 | 6.70E+06 | 4.76E+06 |
| 8.04E+04 | 2.02E+05 | 2.24E+05 | 7.44E+04 | 8.72E+04 | 9.93E+04 | 8.74E+04 | 9.34E+04 | 1.04E+05 |
| 5.45E+05 | 4.74E+06 | 7.04E+06 | 6.06E+05 | 5.88E+05 | 6.47E+06 | 8.90E+05 | 6.31E+06 | 9.40E+05 |
| 1.27E+06 | 1.80E+06 | 1.83E+06 | 1.33E+06 | 1.31E+06 | 1.48E+06 | 2.30E+06 | 3.18E+06 | 2.25E+06 |
| 1.64E+05 | 2.95E+05 | 4.01E+05 | 1.68E+05 | 1.59E+05 | 3.24E+05 | 3.12E+05 | 5.37E+05 | 3.14E+05 |
| 2.88E+04 | 6.07E+04 | 4.32E+04 | 2.50E+04 | 3.18E+04 | 3.89E+04 | 3.48E+04 | 6.64E+04 | 4.97E+04 |
| 3.24E+05 | 4.06E+05 | 5.37E+05 | 3.51E+05 | 3.91E+05 | 3.12E+05 | 6.49E+05 | 1.10E+06 | 5.16E+05 |
| 9.60E+04 | 7.49E+04 | 1.23E+05 | 3.83E+04 | 5.38E+04 | 7.89E+04 | 1.40E+05 | 2.96E+05 | 1.68E+05 |
| 3.43E+05 | 3.53E+05 | 6.27E+05 | 2.32E+05 | 4.83E+05 | 2.12E+05 | 6.99E+05 | 1.09E+06 | 6.10E+05 |
| 9.00E+00 | 4.42E+04 | 3.20E+04 | 1.60E+04 | 1.20E+04 | 1.56E+04 | 1.46E+04 | 4.89E+04 | 1.03E+04 |
| 9.33E+04 | 2.09E+05 | 1.52E+05 | 1.07E+05 | 1.22E+05 | 1.35E+05 | 2.21E+05 | 3.41E+05 | 2.44E+05 |
| 1.82E+04 | 3.05E+04 | 2.68E+04 | 1.07E+04 | 1.66E+04 | 1.76E+04 | 2.39E+04 | 2.58E+04 | 2.55E+04 |
| 8.86E+04 | 1.04E+05 | 6.30E+04 | 6.86E+04 | 5.33E+04 | 1.01E+05 | 6.56E+04 | 3.94E+04 | 5.07E+04 |
| 1.39E+05 | 1.54E+05 | 1.50E+05 | 6.22E+04 | 3.03E+04 | 5.64E+04 | 1.19E+05 | 1.77E+05 | 1.41E+05 |

|          |          |          |          |          |          |          |          |          |
|----------|----------|----------|----------|----------|----------|----------|----------|----------|
| 9.00E+00 | 2.34E+05 | 9.00E+00 | 9.14E+05 | 9.00E+00 | 9.00E+00 | 8.83E+05 | 9.00E+00 | 4.29E+05 |
| 1.05E+06 | 1.13E+06 | 1.47E+06 | 1.13E+06 | 1.04E+06 | 8.99E+05 | 1.66E+06 | 2.00E+06 | 1.88E+06 |
| 3.87E+04 | 1.01E+05 | 5.51E+04 | 4.06E+04 | 5.70E+04 | 4.21E+04 | 5.24E+04 | 6.34E+04 | 4.55E+04 |
| 4.27E+05 | 8.19E+05 | 5.54E+05 | 4.57E+05 | 4.87E+05 | 4.89E+05 | 9.00E+00 | 9.00E+00 | 9.00E+00 |
| 3.22E+07 | 3.50E+07 | 4.27E+07 | 3.51E+07 | 4.10E+07 | 3.38E+07 | 3.49E+07 | 3.84E+07 | 3.96E+07 |
| 9.00E+00 | 9.00E+00 | 8.77E+04 | 5.48E+04 | 9.00E+00 | 9.00E+00 | 2.03E+05 | 2.73E+05 | 1.26E+05 |
| 9.00E+00 |
| 1.92E+04 | 3.89E+04 | 3.14E+04 | 1.96E+04 | 2.28E+04 | 1.74E+04 | 3.48E+04 | 3.35E+04 | 3.53E+04 |
| 4.90E+06 | 3.84E+06 | 4.84E+06 | 3.97E+06 | 3.90E+06 | 3.76E+06 | 3.80E+06 | 3.62E+06 | 3.73E+06 |
| 7.44E+04 | 5.85E+04 | 6.30E+04 | 1.10E+05 | 6.14E+04 | 8.23E+04 | 1.03E+05 | 1.06E+05 | 7.33E+04 |
| 4.62E+05 | 4.55E+05 | 4.99E+05 | 2.72E+05 | 4.70E+05 | 4.09E+05 | 4.42E+05 | 6.56E+05 | 5.79E+05 |
| 6.30E+06 | 6.01E+06 | 7.62E+06 | 6.08E+06 | 6.13E+06 | 5.76E+06 | 8.19E+06 | 1.08E+07 | 8.66E+06 |
| 9.24E+05 | 1.16E+06 | 1.14E+06 | 1.20E+06 | 9.77E+05 | 9.76E+05 | 1.13E+06 | 1.69E+06 | 1.21E+06 |
| 2.74E+04 | 1.11E+04 | 4.99E+04 | 5.89E+04 | 4.47E+04 | 5.12E+04 | 4.37E+04 | 4.06E+04 | 4.34E+04 |
| 5.07E+04 | 4.67E+04 | 6.70E+04 | 2.45E+04 | 4.60E+04 | 4.92E+04 | 5.25E+04 | 6.48E+04 | 3.03E+04 |
| 9.00E+00 | 9.00E+00 | 9.00E+00 | 1.07E+04 | 9.00E+00 | 2.68E+04 | 9.00E+00 | 9.00E+00 | 9.00E+00 |
| 8.27E+04 | 7.81E+04 | 7.39E+04 | 1.01E+05 | 7.04E+04 | 1.16E+05 | 9.01E+04 | 1.08E+05 | 7.65E+04 |
| 9.00E+00 | 9.00E+00 | 9.00E+00 | 1.08E+04 | 5.15E+03 | 9.00E+00 | 9.96E+03 | 4.17E+03 | 1.20E+04 |
| 2.02E+04 | 9.39E+03 | 1.79E+04 | 4.45E+03 | 9.87E+03 | 9.28E+03 | 2.07E+04 | 1.14E+04 | 7.03E+03 |
| 9.00E+00 | 9.00E+00 | 1.12E+04 | 9.00E+00 | 9.00E+00 | 4.81E+03 | 1.02E+04 | 4.38E+03 | 8.94E+03 |
| 9.00E+00 | 9.00E+00 | 9.00E+00 | 9.00E+00 | 1.82E+03 | 2.70E+03 | 9.00E+00 | 9.00E+00 | 9.00E+00 |
| 1.24E+03 | 9.00E+00 | 9.00E+00 | 9.00E+00 | 9.00E+00 | 9.00E+00 | 3.01E+03 | 2.01E+03 | 4.14E+03 |
| 9.00E+00 | 9.00E+00 | 2.44E+03 | 9.00E+00 | 9.00E+00 | 9.00E+00 | 6.94E+03 | 4.41E+03 | 1.63E+04 |
| 6.95E+04 | 7.06E+04 | 7.92E+04 | 5.21E+04 | 6.06E+04 | 7.08E+04 | 7.35E+04 | 5.54E+04 | 1.58E+04 |
| 9.00E+00 | 1.25E+04 | 9.00E+00 | 2.47E+04 | 9.00E+00 | 9.00E+00 | 2.33E+04 | 4.55E+04 | 2.36E+04 |
| 8.98E+04 | 1.19E+05 | 6.36E+04 | 9.59E+04 | 5.52E+04 | 1.11E+05 | 8.58E+04 | 8.98E+04 | 1.03E+05 |
| 2.00E+04 | 2.21E+04 | 1.67E+04 | 1.59E+04 | 2.55E+04 | 1.77E+04 | 1.81E+04 | 2.22E+04 | 1.63E+04 |
| 4.27E+04 | 6.01E+04 | 8.64E+04 | 6.07E+04 | 8.90E+04 | 4.18E+04 | 8.13E+04 | 6.30E+04 | 4.23E+04 |
| 9.00E+00 | 9.00E+00 | 9.00E+00 | 9.00E+00 | 9.00E+00 | 9.00E+00 | 3.17E+03 | 8.81E+03 | 7.03E+03 |
| 3.98E+04 | 4.04E+04 | 3.52E+04 | 3.53E+04 | 3.12E+04 | 9.10E+03 | 4.10E+04 | 3.41E+04 | 4.67E+04 |
| 5.86E+04 | 6.31E+04 | 8.76E+04 | 1.04E+05 | 8.62E+04 | 1.52E+05 | 1.25E+05 | 1.28E+05 | 1.24E+05 |
| 6.36E+04 | 2.49E+04 | 5.73E+04 | 3.85E+04 | 4.58E+04 | 1.02E+04 | 4.05E+04 | 2.33E+04 | 5.47E+04 |
| 2.42E+04 | 8.87E+03 | 2.26E+04 | 1.99E+04 | 1.77E+04 | 6.91E+03 | 1.64E+04 | 1.31E+04 | 2.00E+03 |
| 9.00E+00 |
| 9.00E+00 | 2.49E+03 | 3.48E+03 | 6.09E+03 | 9.00E+00 | 8.39E+03 | 9.00E+00 | 9.00E+00 | 2.49E+03 |
| 3.95E+03 | 9.90E+03 | 7.21E+03 | 8.70E+03 | 1.96E+03 | 2.45E+03 | 4.89E+03 | 3.90E+03 | 6.60E+03 |
| 9.00E+00 | 9.00E+00 | 9.00E+00 | 4.44E+03 | 1.02E+03 | 3.53E+03 | 9.00E+00 | 1.90E+03 | 1.53E+03 |
| 2.43E+03 | 4.07E+03 | 4.45E+03 | 9.00E+00 | 9.00E+00 | 5.12E+03 | 4.00E+03 | 1.98E+03 | 1.01E+04 |
| 3.45E+03 | 2.44E+03 | 3.96E+03 | 9.00E+00 | 9.64E+02 | 2.40E+03 | 9.00E+00 | 9.00E+00 | 9.00E+00 |
| 9.00E+00 | 9.00E+00 | 1.35E+03 | 9.00E+00 | 2.74E+03 | 9.00E+00 | 9.00E+00 | 1.35E+03 | 9.00E+00 |
| 1.28E+05 | 1.09E+05 | 9.59E+04 | 1.25E+05 | 5.23E+04 | 1.13E+05 | 8.97E+04 | 1.35E+05 | 1.17E+05 |
| 5.07E+02 | 2.05E+03 | 1.04E+03 | 9.00E+00 | 4.60E+03 | 5.08E+02 | 9.00E+00 | 9.00E+00 | 1.49E+03 |
| 9.00E+00 |
| 1.53E+03 | 9.00E+00 | 1.54E+03 | 9.00E+00 | 9.00E+00 | 9.00E+00 | 4.89E+03 | 2.05E+03 | 3.45E+03 |
| 9.00E+00 | 9.00E+00 | 1.02E+03 | 9.00E+00 | 9.00E+00 | 9.00E+00 | 1.02E+03 | 9.00E+00 | 9.00E+00 |
| 1.34E+05 | 1.34E+05 | 1.38E+05 | 1.43E+05 | 1.33E+05 | 2.01E+05 | 1.35E+05 | 1.64E+05 | 1.82E+05 |
| 1.03E+05 | 7.47E+04 | 8.46E+04 | 9.65E+04 | 8.43E+04 | 1.54E+05 | 1.10E+05 | 1.10E+05 | 1.38E+05 |
| 1.14E+04 | 2.41E+04 | 3.33E+04 | 2.83E+04 | 3.63E+04 | 1.99E+04 | 2.22E+04 | 2.41E+04 | 3.02E+04 |
| 2.33E+04 | 7.90E+03 | 2.52E+04 | 1.24E+04 | 4.20E+04 | 2.11E+04 | 3.01E+04 | 1.83E+04 | 6.41E+03 |
| 1.65E+05 | 1.83E+05 | 1.53E+05 | 4.44E+04 | 2.05E+05 | 2.28E+05 | 2.01E+05 | 4.39E+04 | 1.58E+05 |
| 6.07E+04 | 6.12E+04 | 5.54E+04 | 2.85E+04 | 2.36E+04 | 7.70E+04 | 1.64E+04 | 7.46E+04 | 4.69E+04 |
| 2.96E+05 | 2.10E+05 | 2.44E+05 | 2.38E+05 | 1.91E+05 | 2.37E+05 | 2.06E+05 | 2.41E+05 | 2.51E+05 |
| 1.11E+04 | 4.40E+04 | 1.59E+04 | 3.26E+04 | 2.95E+04 | 1.97E+04 | 4.53E+04 | 1.20E+04 | 4.76E+04 |
| 8.71E+03 | 5.43E+03 | 1.88E+04 | 5.43E+03 | 1.26E+04 | 3.80E+03 | 7.68E+03 | 5.37E+03 | 1.60E+04 |

|          |          |          |          |          |          |          |          |          |
|----------|----------|----------|----------|----------|----------|----------|----------|----------|
| 4.47E+05 | 3.84E+05 | 3.34E+05 | 3.73E+05 | 4.08E+05 | 3.79E+05 | 3.98E+05 | 3.99E+05 | 3.80E+05 |
| 4.10E+04 | 1.37E+05 | 1.18E+05 | 1.53E+05 | 1.27E+05 | 1.71E+05 | 2.40E+05 | 1.33E+05 | 1.77E+05 |
| 5.55E+04 | 6.44E+04 | 7.49E+04 | 7.49E+04 | 3.67E+04 | 5.41E+04 | 8.05E+04 | 4.93E+04 | 5.22E+04 |
| 1.08E+05 | 1.31E+05 | 1.01E+05 | 1.28E+05 | 1.46E+05 | 1.60E+05 | 1.54E+05 | 1.24E+05 | 1.53E+05 |
| 4.24E+04 | 4.67E+04 | 3.31E+04 | 2.93E+04 | 4.87E+04 | 5.57E+04 | 7.90E+04 | 4.08E+04 | 6.86E+04 |
| 1.63E+03 | 5.43E+03 | 6.40E+03 | 9.14E+03 | 9.60E+03 | 1.03E+03 | 6.34E+03 | 7.48E+03 | 1.07E+04 |
| 9.00E+00 | 9.00E+00 | 2.02E+04 | 2.17E+04 | 9.00E+00 | 9.00E+00 | 9.00E+00 | 9.00E+00 | 1.16E+04 |
| 1.04E+04 | 1.53E+04 | 2.25E+04 | 1.27E+04 | 5.95E+03 | 1.63E+04 | 3.10E+04 | 2.24E+04 | 1.90E+04 |
| 5.40E+04 | 8.18E+04 | 6.99E+04 | 6.74E+04 | 9.63E+04 | 4.45E+04 | 9.56E+04 | 6.86E+04 | 1.14E+05 |
| 1.53E+04 | 5.42E+03 | 1.08E+04 | 9.21E+03 | 2.04E+04 | 1.69E+04 | 1.72E+04 | 1.42E+04 | 2.21E+04 |
| 2.48E+03 | 6.88E+03 | 3.97E+03 | 3.98E+03 | 5.99E+03 | 1.14E+04 | 1.34E+04 | 9.65E+02 | 1.34E+04 |
| 5.12E+02 | 3.61E+03 | 2.50E+03 | 6.59E+03 | 3.05E+03 | 1.04E+03 | 5.01E+03 | 9.64E+03 | 2.58E+03 |
| 9.00E+00 | 1.35E+03 | 9.00E+00 | 1.44E+03 | 9.22E+02 | 9.00E+00 | 9.00E+00 | 9.00E+00 | 9.00E+00 |
| 9.00E+00 | 9.00E+00 | 9.00E+00 | 9.00E+00 | 1.10E+03 | 9.00E+00 | 4.92E+03 | 2.18E+03 | 1.10E+03 |
| 5.07E+02 | 1.04E+03 | 5.59E+03 | 3.43E+03 | 9.00E+00 | 3.09E+03 | 9.00E+00 | 9.00E+00 | 5.62E+03 |
| 1.90E+04 | 1.68E+04 | 2.30E+04 | 1.19E+04 | 1.01E+04 | 1.17E+04 | 4.00E+04 | 1.79E+04 | 2.65E+04 |
| 1.30E+04 | 5.40E+03 | 1.89E+04 | 1.06E+04 | 1.79E+04 | 5.87E+03 | 2.50E+04 | 9.75E+03 | 1.12E+04 |
| 1.82E+04 | 2.63E+04 | 2.61E+04 | 1.90E+04 | 1.85E+04 | 2.17E+04 | 2.88E+04 | 2.69E+04 | 2.50E+04 |
| 9.00E+00 | 5.02E+03 | 3.09E+03 | 9.00E+00 | 9.00E+00 | 9.00E+00 | 3.08E+03 | 9.00E+00 | 9.00E+00 |
| 9.91E+02 | 1.93E+03 | 9.53E+02 | 9.00E+00 | 1.93E+03 | 2.48E+03 | 9.77E+02 | 7.18E+03 | 1.95E+03 |
| 2.23E+04 | 1.87E+04 | 2.03E+04 | 7.04E+03 | 3.35E+04 | 1.03E+04 | 2.42E+04 | 1.41E+04 | 2.16E+04 |
| 9.00E+00 | 9.00E+00 | 9.00E+00 | 2.54E+03 | 5.95E+03 | 9.00E+00 | 2.58E+03 | 3.07E+03 | 2.01E+03 |
| 9.00E+00 |
| 1.80E+03 | 1.85E+03 | 1.37E+03 | 1.82E+03 | 9.00E+00 | 9.00E+00 | 8.90E+02 | 9.00E+00 | 9.00E+00 |
| 2.41E+05 | 2.33E+05 | 2.79E+05 | 1.87E+05 | 2.16E+05 | 3.02E+05 | 1.38E+05 | 1.37E+05 | 1.91E+05 |
| 9.74E+02 | 9.00E+00 | 8.17E+03 | 3.91E+03 | 1.47E+03 | 9.00E+00 | 8.85E+03 | 2.90E+03 | 2.97E+03 |
| 1.39E+03 | 9.00E+00 | 1.69E+03 | 9.00E+00 | 9.00E+00 | 9.00E+00 | 9.00E+00 | 9.00E+00 | 9.00E+00 |
| 1.15E+04 | 1.35E+04 | 1.00E+04 | 1.49E+04 | 2.17E+04 | 2.17E+04 | 1.73E+04 | 1.76E+04 | 1.44E+04 |
| 4.09E+04 | 2.34E+04 | 5.48E+04 | 1.83E+04 | 4.21E+04 | 2.20E+04 | 2.00E+04 | 4.40E+04 | 2.70E+04 |
| 1.89E+04 | 1.47E+04 | 1.39E+04 | 2.08E+04 | 2.93E+04 | 1.95E+04 | 3.51E+04 | 9.00E+00 | 9.00E+00 |
| 1.63E+05 | 1.33E+05 | 3.86E+04 | 1.26E+05 | 1.23E+05 | 5.08E+04 | 2.07E+05 | 3.14E+04 | 2.03E+05 |
| 9.00E+00 |
| 1.80E+03 | 9.00E+00 | 2.72E+03 | 9.00E+00 | 9.00E+00 | 9.00E+00 | 9.00E+00 | 9.00E+00 | 9.03E+02 |
| 9.00E+00 | 9.00E+00 | 1.44E+03 | 9.00E+00 | 9.00E+00 | 9.00E+00 | 5.52E+03 | 2.97E+03 | 1.52E+03 |
| 2.24E+03 | 9.80E+02 | 9.00E+00 | 4.14E+03 | 9.00E+00 | 2.66E+03 | 7.22E+03 | 9.00E+00 | 3.60E+03 |
| 9.00E+00 |
| 2.79E+05 | 3.21E+05 | 3.12E+05 | 2.62E+05 | 2.44E+05 | 2.43E+05 | 5.56E+04 | 2.99E+05 | 2.52E+05 |
| 1.38E+05 | 8.15E+04 | 9.86E+04 | 8.41E+04 | 9.68E+04 | 1.10E+05 | 6.44E+04 | 8.74E+04 | 9.50E+04 |
| 9.00E+00 | 9.00E+00 | 1.83E+04 | 9.00E+00 | 9.00E+00 | 9.00E+00 | 1.99E+04 | 2.37E+04 | 1.41E+04 |
| 6.39E+04 | 9.00E+00 | 9.00E+00 | 9.00E+00 | 9.00E+00 | 9.00E+00 | 5.27E+04 | 6.92E+04 | 6.17E+04 |
| 2.73E+04 | 9.00E+00 | 1.94E+04 | 1.20E+04 | 2.70E+04 | 2.85E+04 | 9.00E+00 | 2.59E+04 | 9.00E+00 |
| 9.00E+00 |
| 5.07E+04 | 1.92E+04 | 3.55E+04 | 3.65E+04 | 1.27E+04 | 4.40E+04 | 4.13E+04 | 1.55E+04 | 4.18E+04 |
| 1.73E+04 | 2.38E+04 | 3.93E+04 | 2.86E+04 | 3.17E+04 | 1.97E+04 | 4.14E+04 | 2.38E+04 | 2.56E+04 |
| 8.78E+03 | 7.05E+03 | 9.00E+00 | 8.04E+03 | 1.47E+04 | 1.14E+04 | 2.70E+04 | 2.22E+04 | 3.71E+03 |
| 9.00E+00 | 9.00E+00 | 9.00E+00 | 9.00E+00 | 9.00E+00 | 1.48E+03 | 9.00E+00 | 5.46E+03 | 5.48E+02 |
| 9.00E+00 |
| 2.63E+04 | 8.07E+03 | 5.52E+03 | 1.99E+03 | 6.05E+03 | 1.86E+04 | 9.00E+00 | 4.01E+03 | 9.00E+00 |
| 9.00E+00 |
| 5.86E+03 | 5.44E+03 | 5.21E+03 | 7.07E+03 | 5.52E+03 | 1.01E+04 | 8.53E+03 | 5.57E+03 | 7.98E+03 |
| 3.02E+03 | 4.09E+03 | 9.77E+03 | 9.00E+00 | 1.58E+03 | 5.69E+03 | 8.91E+03 | 7.35E+03 | 9.00E+00 |
| 9.00E+00 | 9.00E+00 | 9.00E+00 | 9.00E+00 | 9.00E+00 | 1.59E+03 | 9.00E+00 | 9.00E+00 | 9.00E+00 |
| 9.00E+00 | 9.00E+00 | 9.00E+00 | 1.61E+03 | 9.00E+00 | 9.00E+00 | 9.00E+00 | 9.00E+00 | 9.00E+00 |
| 6.40E+03 | 1.07E+04 | 1.62E+04 | 8.32E+03 | 8.98E+03 | 1.60E+04 | 3.65E+03 | 4.55E+03 | 7.79E+03 |



|          |          |          |          |          |          |          |          |          |
|----------|----------|----------|----------|----------|----------|----------|----------|----------|
| 1.10E+04 | 9.22E+03 | 5.67E+03 | 4.85E+03 | 2.09E+04 | 9.77E+03 | 4.31E+03 | 3.04E+03 | 3.26E+03 |
| 9.00E+00 | 1.02E+03 | 9.00E+00 | 9.00E+00 | 9.00E+00 | 9.00E+00 | 9.00E+00 | 9.00E+00 | 2.07E+03 |
| 9.00E+00 | 9.00E+00 | 2.07E+03 | 9.00E+00 | 1.06E+03 | 9.00E+00 | 1.59E+03 | 2.01E+03 | 1.62E+03 |
| 9.78E+02 | 9.00E+00 |
| 9.00E+00 | 3.11E+03 | 2.55E+03 | 9.00E+00 | 9.00E+00 | 9.00E+00 | 9.00E+00 | 9.00E+00 | 9.00E+00 |
| 9.14E+03 | 1.65E+03 | 1.45E+04 | 5.84E+03 | 1.67E+04 | 9.64E+03 | 7.08E+03 | 7.69E+03 | 1.19E+04 |
| 2.06E+03 | 1.54E+03 | 9.00E+00 | 1.04E+03 | 9.00E+00 | 4.89E+03 | 9.00E+00 | 3.11E+03 | 3.04E+03 |
| 9.00E+00 | 9.00E+00 | 9.00E+00 | 1.49E+03 | 2.19E+03 | 9.00E+00 | 4.36E+03 | 2.15E+03 | 2.57E+03 |
| 1.53E+04 | 1.66E+04 | 9.00E+00 | 1.79E+04 | 1.54E+04 | 2.63E+04 | 3.10E+04 | 3.80E+04 | 4.26E+04 |
| 9.00E+00 | 3.28E+03 | 9.00E+00 |
| 3.71E+06 | 2.82E+06 | 2.43E+06 | 2.64E+06 | 2.21E+06 | 2.68E+06 | 2.72E+06 | 3.07E+06 | 3.01E+06 |
| 5.32E+05 | 4.18E+05 | 2.24E+05 | 3.40E+05 | 4.24E+05 | 4.73E+05 | 6.14E+05 | 4.49E+05 | 5.24E+05 |
| 7.07E+04 | 9.26E+04 | 9.00E+00 | 9.00E+00 | 9.00E+00 | 9.00E+00 | 9.00E+00 | 9.00E+00 | 9.99E+04 |
| 3.18E+06 | 2.96E+06 | 2.77E+06 | 2.61E+06 | 2.40E+06 | 2.65E+06 | 2.97E+06 | 2.97E+06 | 2.72E+06 |
| 3.51E+05 | 2.43E+05 | 1.96E+05 | 2.45E+05 | 2.55E+05 | 2.37E+05 | 3.34E+05 | 3.30E+05 | 2.95E+05 |
| 3.32E+04 | 1.77E+04 | 6.23E+03 | 9.26E+03 | 1.39E+04 | 2.42E+04 | 1.98E+04 | 2.87E+04 | 2.44E+04 |
| 2.61E+05 | 2.93E+05 | 2.40E+05 | 2.63E+05 | 1.49E+05 | 2.44E+05 | 2.68E+05 | 2.80E+05 | 2.73E+05 |
| 1.48E+06 | 1.18E+06 | 1.30E+06 | 1.34E+06 | 1.16E+06 | 1.10E+06 | 1.45E+06 | 1.50E+06 | 1.37E+06 |
| 9.00E+00 |
| 1.40E+05 | 1.26E+05 | 9.85E+04 | 8.24E+04 | 9.87E+04 | 1.01E+05 | 2.43E+05 | 1.38E+05 | 1.48E+05 |
| 3.69E+04 | 2.46E+04 | 1.36E+04 | 2.33E+04 | 1.38E+04 | 5.12E+04 | 9.00E+00 | 9.00E+00 | 3.17E+04 |
| 7.13E+04 | 5.27E+04 | 4.99E+04 | 6.11E+04 | 5.10E+04 | 8.31E+04 | 1.37E+05 | 1.10E+05 | 4.74E+04 |
| 1.35E+05 | 1.14E+05 | 1.33E+05 | 6.79E+04 | 1.81E+05 | 1.32E+05 | 1.83E+05 | 9.24E+04 | 2.00E+05 |
| 1.43E+04 | 1.09E+04 | 9.15E+03 | 9.69E+03 | 1.72E+04 | 1.94E+03 | 2.14E+04 | 1.46E+03 | 1.09E+04 |
| 9.00E+00 | 1.53E+03 | 9.00E+00 | 1.55E+03 | 2.04E+03 | 9.00E+00 | 9.00E+00 | 9.00E+00 | 1.03E+03 |
| 4.30E+03 | 5.21E+03 | 9.00E+00 | 9.00E+00 | 9.00E+00 | 9.00E+00 | 9.00E+00 | 4.56E+03 | 5.89E+03 |
| 1.18E+05 | 1.01E+05 | 1.32E+05 | 1.21E+05 | 1.49E+05 | 1.71E+05 | 2.30E+05 | 1.21E+05 | 1.49E+05 |
| 2.94E+04 | 1.32E+04 | 3.75E+04 | 3.31E+04 | 3.43E+04 | 2.24E+04 | 4.01E+04 | 5.14E+04 | 4.61E+04 |
| 4.03E+03 | 1.58E+04 | 2.06E+03 | 1.03E+03 | 3.95E+03 | 8.19E+03 | 9.00E+00 | 9.00E+00 | 6.98E+03 |
| 9.00E+00 | 9.00E+00 | 9.00E+00 | 1.44E+03 | 9.00E+00 | 9.16E+02 | 9.00E+00 | 9.00E+00 | 9.92E+02 |
| 4.61E+03 | 4.27E+03 | 4.23E+03 | 1.47E+04 | 4.88E+03 | 1.34E+04 | 7.78E+03 | 9.00E+00 | 5.86E+03 |
| 1.09E+05 | 1.20E+05 | 1.06E+05 | 1.06E+05 | 1.27E+05 | 1.47E+05 | 1.37E+05 | 1.34E+05 | 1.67E+05 |
| 7.34E+03 | 1.49E+03 | 1.49E+03 | 3.05E+03 | 9.98E+02 | 1.03E+03 | 5.64E+03 | 1.52E+03 | 8.52E+03 |
| 2.18E+04 | 1.78E+04 | 3.33E+04 | 1.48E+04 | 3.09E+04 | 2.45E+04 | 1.02E+04 | 3.45E+04 | 3.84E+04 |
| 3.45E+04 | 2.76E+04 | 4.38E+04 | 1.95E+04 | 2.15E+04 | 1.88E+04 | 9.00E+00 | 2.91E+04 | 9.00E+00 |
| 1.97E+03 | 9.77E+02 | 9.00E+00 | 9.00E+00 | 9.00E+00 | 9.53E+02 | 6.34E+03 | 9.00E+00 | 9.00E+00 |
| 3.72E+03 | 9.00E+00 | 3.18E+03 | 1.04E+03 | 2.06E+03 | 3.12E+03 | 9.00E+00 | 3.63E+03 | 2.65E+03 |
| 5.60E+04 | 2.95E+04 | 3.12E+04 | 4.87E+04 | 6.76E+04 | 4.42E+04 | 4.92E+04 | 5.40E+04 | 6.64E+04 |
| 5.28E+03 | 1.01E+04 | 1.63E+04 | 9.00E+00 | 1.64E+04 | 5.50E+03 | 4.97E+03 | 7.41E+03 | 7.76E+03 |
| 1.55E+03 | 1.59E+03 | 9.00E+00 | 9.00E+00 | 1.03E+03 | 1.03E+03 | 2.08E+03 | 9.00E+00 | 9.00E+00 |
| 8.20E+03 | 7.84E+03 | 2.62E+03 | 3.17E+03 | 9.34E+03 | 1.03E+04 | 2.09E+03 | 2.03E+03 | 6.45E+03 |
| 9.00E+00 | 9.00E+00 | 1.97E+03 | 1.54E+03 | 9.00E+00 | 9.00E+00 | 2.73E+03 | 9.00E+00 | 5.43E+02 |
| 7.85E+05 | 7.70E+05 | 8.14E+05 | 7.27E+05 | 6.96E+05 | 7.51E+05 | 8.32E+05 | 8.04E+05 | 7.82E+05 |
| 8.76E+05 | 6.48E+05 | 5.71E+05 | 7.15E+05 | 5.54E+05 | 6.06E+05 | 8.41E+05 | 7.60E+05 | 6.93E+05 |
| 9.86E+04 | 1.01E+05 | 1.01E+05 | 9.46E+04 | 1.63E+05 | 1.16E+05 | 1.74E+05 | 1.07E+05 | 1.51E+05 |
| 1.53E+04 | 1.26E+04 | 1.39E+04 | 1.20E+04 | 1.22E+04 | 1.06E+04 | 1.47E+04 | 1.92E+04 | 1.64E+04 |
| 6.28E+04 | 4.71E+04 | 4.27E+04 | 4.71E+04 | 3.77E+04 | 3.60E+04 | 6.19E+04 | 5.92E+04 | 4.49E+04 |
| 9.00E+00 | 9.00E+00 | 9.00E+00 | 6.62E+03 | 9.38E+03 | 9.99E+03 | 1.91E+03 | 3.24E+03 | 9.00E+00 |
| 5.90E+03 | 6.99E+03 | 8.30E+03 | 8.06E+03 | 6.97E+03 | 7.29E+03 | 6.19E+03 | 8.72E+03 | 7.09E+03 |
| 9.00E+00 | 9.00E+00 | 9.00E+00 | 9.00E+00 | 9.00E+00 | 1.21E+05 | 9.00E+00 | 9.00E+00 | 9.00E+00 |
| 2.90E+05 | 2.85E+05 | 2.14E+05 | 2.33E+05 | 2.59E+05 | 3.39E+05 | 4.23E+05 | 3.13E+05 | 3.72E+05 |
| 2.63E+05 | 2.76E+05 | 3.65E+05 | 3.06E+05 | 4.92E+05 | 4.62E+05 | 4.22E+05 | 2.45E+05 | 3.97E+05 |
| 9.00E+00 | 9.00E+00 | 9.00E+00 | 5.12E+03 | 9.00E+00 | 9.00E+00 | 9.00E+00 | 3.99E+03 | 9.00E+00 |
| 4.03E+04 | 6.50E+04 | 5.04E+04 | 6.18E+04 | 4.72E+04 | 3.75E+04 | 6.90E+04 | 5.63E+04 | 4.03E+04 |

|          |          |          |          |          |          |          |          |          |
|----------|----------|----------|----------|----------|----------|----------|----------|----------|
| 1.24E+04 | 1.34E+04 | 2.38E+04 | 2.11E+04 | 2.79E+04 | 2.81E+04 | 3.56E+04 | 1.22E+04 | 2.62E+04 |
| 3.65E+05 | 4.44E+05 | 3.80E+05 | 3.65E+05 | 2.87E+05 | 5.10E+05 | 4.70E+05 | 4.50E+05 | 5.02E+05 |
| 9.00E+00 | 9.00E+00 | 9.00E+00 | 9.00E+00 | 9.00E+00 | 9.00E+00 | 7.36E+03 | 6.37E+03 | 8.22E+03 |
| 9.00E+00 | 9.00E+00 | 5.57E+03 | 9.00E+00 | 9.00E+00 | 9.00E+00 | 9.00E+00 | 8.62E+03 | 9.00E+00 |
| 9.00E+00 | 7.74E+03 | 3.03E+03 | 6.34E+03 | 5.31E+03 | 4.50E+03 | 9.00E+00 | 9.00E+00 | 9.00E+00 |
| 1.69E+04 | 3.20E+04 | 2.15E+04 | 2.20E+04 | 2.88E+04 | 3.36E+04 | 2.40E+04 | 1.42E+04 | 2.34E+04 |
| 1.14E+04 | 9.00E+00 | 2.16E+04 | 1.38E+04 | 1.43E+04 | 9.00E+00 | 2.18E+04 | 1.63E+04 | 1.33E+04 |
| 1.35E+06 | 1.36E+06 | 1.40E+06 | 1.58E+06 | 1.38E+06 | 1.33E+06 | 1.28E+06 | 1.44E+06 | 1.52E+06 |
| 9.00E+00 |
| 9.00E+00 | 1.45E+03 | 9.00E+00 |
| 9.00E+00 | 9.00E+00 | 9.00E+00 | 9.00E+00 | 9.00E+00 | 5.18E+02 | 9.00E+00 | 9.00E+00 | 9.00E+00 |
| 1.33E+05 | 1.28E+05 | 1.15E+05 | 1.52E+05 | 1.77E+05 | 1.92E+05 | 1.68E+05 | 1.15E+05 | 1.00E+05 |
| 4.30E+04 | 2.61E+04 | 4.80E+04 | 5.96E+04 | 4.71E+04 | 6.52E+04 | 2.35E+04 | 4.60E+04 | 4.33E+04 |
| 5.19E+02 | 2.98E+03 | 9.00E+00 | 3.09E+03 | 4.49E+03 | 1.00E+03 | 2.50E+03 | 1.55E+03 | 9.00E+00 |
| 9.40E+04 | 7.95E+04 | 6.65E+04 | 8.00E+04 | 4.44E+04 | 8.85E+04 | 7.17E+04 | 5.16E+04 | 8.77E+04 |
| 2.42E+04 | 3.22E+04 | 3.07E+04 | 2.36E+04 | 1.93E+04 | 2.33E+04 | 6.40E+03 | 2.10E+04 | 1.11E+04 |
| 2.83E+05 | 3.20E+05 | 3.17E+05 | 2.57E+05 | 2.03E+05 | 3.52E+05 | 1.69E+05 | 1.48E+05 | 1.15E+05 |
| 9.00E+00 |
| 9.00E+00 | 2.91E+03 | 9.00E+00 |
| 9.00E+00 |
| 1.35E+04 | 5.12E+03 | 8.45E+03 | 5.78E+03 | 1.07E+04 | 8.19E+03 | 2.31E+04 | 2.27E+04 | 1.28E+04 |
| 9.00E+00 | 7.87E+02 | 9.00E+00 |
| 7.24E+04 | 7.94E+04 | 7.55E+04 | 6.76E+04 | 1.36E+05 | 9.55E+04 | 9.49E+04 | 7.75E+04 | 8.40E+04 |
| 9.00E+00 | 9.00E+00 | 9.12E+03 | 9.00E+00 | 1.36E+04 | 9.00E+00 | 9.00E+00 | 9.00E+00 | 9.00E+00 |
| 1.43E+05 | 1.29E+05 | 1.52E+05 | 1.31E+05 | 1.33E+05 | 1.76E+05 | 1.44E+05 | 1.39E+05 | 1.93E+05 |
| 9.00E+00 |
| 9.00E+00 | 9.00E+00 | 9.00E+00 | 1.54E+04 | 9.00E+00 | 1.52E+04 | 1.43E+04 | 1.55E+04 | 9.00E+00 |
| 5.46E+04 | 4.54E+04 | 4.34E+04 | 4.90E+04 | 4.32E+04 | 5.30E+04 | 5.38E+04 | 4.61E+04 | 3.44E+04 |
| 1.65E+04 | 9.42E+03 | 1.08E+04 | 6.78E+03 | 6.11E+03 | 1.25E+04 | 5.10E+03 | 9.14E+03 | 7.76E+03 |
| 9.00E+00 | 9.00E+00 | 8.11E+03 | 6.53E+03 | 9.00E+00 | 9.00E+00 | 8.48E+03 | 9.00E+00 | 9.00E+00 |
| 1.97E+04 | 9.00E+00 | 9.00E+00 | 9.00E+00 | 7.22E+03 | 4.13E+03 | 9.00E+00 | 9.00E+00 | 9.00E+00 |
| 4.99E+05 | 4.61E+05 | 5.73E+05 | 7.18E+05 | 4.58E+05 | 5.88E+05 | 4.68E+05 | 5.61E+05 | 4.77E+05 |
| 9.00E+00 | 9.00E+00 | 9.00E+00 | 9.00E+00 | 9.00E+00 | 9.00E+00 | 9.04E+03 | 9.00E+00 | 9.00E+00 |
| 9.00E+00 | 9.00E+00 | 9.00E+00 | 9.00E+00 | 9.00E+00 | 9.00E+00 | 3.56E+03 | 9.00E+00 | 9.00E+00 |
| 3.04E+04 | 4.16E+04 | 5.08E+04 | 1.99E+04 | 3.97E+04 | 4.27E+04 | 5.31E+04 | 9.77E+03 | 5.26E+04 |
| 1.18E+05 | 5.94E+04 | 1.05E+05 | 4.39E+04 | 9.72E+04 | 1.06E+05 | 2.14E+05 | 1.07E+05 | 1.61E+05 |
| 8.41E+04 | 4.88E+04 | 4.86E+04 | 4.41E+04 | 6.25E+04 | 4.88E+04 | 5.57E+04 | 3.20E+04 | 9.86E+04 |
| 3.96E+03 | 2.97E+03 | 5.09E+03 | 9.00E+00 | 3.00E+03 | 3.87E+03 | 6.54E+03 | 5.08E+02 | 7.45E+03 |
| 1.94E+03 | 4.45E+03 | 1.47E+03 | 3.51E+03 | 3.89E+03 | 9.00E+00 | 1.92E+03 | 1.92E+03 | 2.54E+03 |
| 6.50E+03 | 1.01E+04 | 4.04E+03 | 1.01E+04 | 7.18E+03 | 1.11E+04 | 6.99E+03 | 2.96E+03 | 1.71E+04 |
| 9.00E+00 | 9.00E+00 | 9.00E+00 | 9.00E+00 | 2.16E+03 | 9.00E+00 | 9.00E+00 | 9.00E+00 | 9.00E+00 |
| 4.03E+04 | 6.11E+04 | 4.57E+04 | 3.88E+04 | 5.03E+04 | 6.13E+04 | 2.35E+04 | 3.52E+04 | 4.54E+04 |
| 3.36E+03 | 9.00E+00 | 5.01E+02 | 9.00E+00 | 1.02E+03 | 9.00E+00 | 9.00E+00 | 9.00E+00 | 9.00E+00 |
| 9.00E+00 | 9.00E+00 | 9.00E+00 | 9.00E+00 | 3.68E+03 | 9.00E+00 | 9.00E+00 | 9.00E+00 | 9.00E+00 |
| 1.07E+04 | 3.34E+04 | 2.08E+04 | 3.22E+04 | 1.05E+04 | 2.05E+04 | 9.00E+00 | 9.00E+00 | 9.00E+00 |
| 2.72E+03 | 3.28E+03 | 6.45E+03 | 6.36E+03 | 1.54E+03 | 9.00E+00 | 2.61E+03 | 2.69E+03 | 7.02E+03 |
| 1.03E+03 | 1.55E+03 | 5.10E+02 | 2.07E+03 | 2.47E+03 | 5.05E+02 | 9.00E+00 | 9.00E+00 | 5.09E+02 |
| 5.07E+02 | 3.50E+03 | 4.44E+03 | 2.94E+03 | 9.00E+00 | 4.43E+03 | 5.94E+03 | 9.00E+00 | 9.97E+02 |
| 8.12E+04 | 7.50E+04 | 5.59E+04 | 6.12E+04 | 5.45E+04 | 8.88E+04 | 7.96E+04 | 8.75E+04 | 7.11E+04 |
| 4.04E+03 | 3.05E+03 | 9.00E+00 | 2.48E+03 | 9.80E+02 | 5.07E+02 | 9.00E+00 | 9.00E+00 | 2.99E+03 |
| 9.00E+00 | 1.94E+03 | 9.71E+02 | 9.00E+00 | 9.00E+00 | 9.00E+00 | 9.00E+00 | 9.00E+00 | 9.00E+00 |
| 1.34E+05 | 1.09E+05 | 1.02E+05 | 8.50E+04 | 1.68E+05 | 1.60E+05 | 2.58E+05 | 1.38E+05 | 2.59E+05 |
| 6.34E+04 | 7.30E+04 | 6.22E+04 | 1.06E+05 | 9.01E+04 | 8.92E+04 | 8.07E+04 | 4.22E+04 | 1.16E+04 |
| 6.24E+04 | 5.91E+04 | 3.56E+04 | 6.49E+04 | 4.77E+04 | 7.16E+04 | 6.26E+04 | 4.53E+04 | 4.86E+04 |

|          |          |          |          |          |          |          |          |          |
|----------|----------|----------|----------|----------|----------|----------|----------|----------|
| 7.74E+03 | 9.00E+00 | 9.00E+00 | 9.00E+00 | 9.00E+00 | 9.00E+00 | 7.66E+03 | 9.00E+00 | 9.00E+00 |
| 2.35E+04 | 3.07E+04 | 1.70E+04 | 3.11E+04 | 1.41E+04 | 1.89E+04 | 4.62E+04 | 1.21E+04 | 4.77E+04 |
| 9.00E+00 | 9.00E+00 | 2.25E+03 | 9.00E+00 | 9.00E+00 | 9.00E+00 | 9.00E+00 | 9.00E+00 | 9.00E+00 |
| 9.00E+00 | 9.00E+00 | 3.39E+03 | 1.09E+03 | 9.00E+00 | 9.00E+00 | 1.46E+03 | 9.00E+00 | 9.00E+00 |
| 4.37E+03 | 2.65E+03 | 3.36E+04 | 1.59E+03 | 4.93E+03 | 5.30E+03 | 1.57E+04 | 1.16E+04 | 7.00E+03 |
| 9.81E+04 | 1.06E+05 | 1.01E+05 | 3.67E+04 | 1.32E+05 | 1.32E+05 | 1.11E+05 | 3.65E+04 | 1.15E+05 |
| 5.63E+03 | 5.58E+03 | 9.00E+00 | 4.67E+03 | 6.22E+03 | 1.48E+04 | 9.00E+00 | 9.00E+00 | 9.00E+00 |
| 3.68E+04 | 9.00E+00 | 1.21E+04 | 1.91E+04 | 9.00E+00 | 3.30E+04 | 1.06E+04 | 9.00E+00 | 1.86E+04 |
| 9.00E+00 | 9.00E+00 | 2.98E+03 | 9.00E+00 | 9.00E+00 | 9.00E+00 | 9.98E+02 | 9.00E+00 | 9.00E+00 |
| 9.00E+00 | 5.90E+03 | 9.00E+00 | 9.00E+00 | 2.76E+03 | 9.00E+00 | 9.00E+00 | 9.00E+00 | 9.00E+00 |
| 1.46E+03 | 9.00E+00 | 2.44E+03 | 2.24E+03 | 9.00E+00 | 1.35E+03 | 9.00E+00 | 4.24E+03 | 1.37E+03 |
| 2.15E+03 | 9.00E+00 |
| 5.48E+04 | 8.08E+04 | 7.40E+04 | 8.04E+04 | 6.72E+04 | 6.97E+04 | 5.28E+04 | 9.07E+04 | 6.95E+04 |
| 9.00E+00 |
| 5.81E+03 | 4.47E+03 | 1.24E+04 | 1.30E+04 | 2.51E+03 | 5.41E+03 | 9.00E+00 | 1.41E+04 | 9.00E+00 |
| 9.00E+00 | 1.17E+03 | 3.62E+03 | 4.42E+03 | 7.63E+03 | 1.54E+04 | 3.24E+03 | 4.88E+03 | 6.41E+03 |
| 9.00E+00 | 1.51E+03 | 9.00E+00 |
| 9.00E+00 | 9.00E+00 | 9.00E+00 | 4.31E+03 | 9.00E+00 | 9.00E+00 | 9.00E+00 | 9.00E+00 | 1.73E+03 |
| 9.00E+00 | 9.00E+00 | 9.00E+00 | 3.43E+03 | 9.00E+00 | 9.00E+00 | 2.94E+03 | 1.47E+03 | 9.00E+00 |
| 1.28E+04 | 1.07E+04 | 8.83E+03 | 5.39E+03 | 9.00E+00 | 8.80E+03 | 8.27E+03 | 2.87E+03 | 9.00E+00 |
| 5.10E+02 | 1.03E+03 | 5.09E+02 | 4.77E+03 | 4.54E+03 | 1.59E+03 | 5.15E+02 | 9.00E+00 | 2.59E+03 |
| 1.07E+03 | 8.53E+03 | 5.15E+03 | 2.08E+03 | 2.67E+03 | 5.18E+02 | 1.55E+03 | 9.00E+00 | 1.08E+03 |
| 2.53E+03 | 9.00E+00 | 9.00E+00 | 2.04E+03 | 9.00E+00 | 2.48E+03 | 9.00E+00 | 1.99E+03 | 9.00E+00 |
| 9.00E+00 |
| 1.81E+04 | 1.08E+04 | 2.64E+04 | 1.35E+04 | 3.08E+03 | 9.00E+00 | 9.00E+00 | 9.00E+00 | 9.00E+00 |
| 1.76E+04 | 1.49E+04 | 6.75E+03 | 1.47E+04 | 2.40E+04 | 2.23E+04 | 1.82E+04 | 2.19E+04 | 8.63E+03 |
| 1.49E+04 | 1.31E+04 | 1.47E+04 | 4.24E+03 | 4.03E+03 | 9.00E+03 | 8.60E+03 | 2.98E+03 | 9.69E+03 |
| 9.00E+00 | 9.00E+00 | 9.00E+00 | 9.00E+00 | 9.00E+00 | 1.02E+03 | 9.00E+00 | 2.07E+03 | 9.00E+00 |
| 9.00E+00 | 9.00E+00 | 9.00E+00 | 9.00E+00 | 6.35E+03 | 9.00E+00 | 2.41E+03 | 9.00E+00 | 6.74E+03 |
| 9.00E+00 | 1.03E+03 | 1.05E+03 | 3.64E+03 | 9.00E+00 | 3.12E+03 | 1.01E+03 | 1.06E+03 | 1.57E+03 |
| 1.46E+04 | 1.25E+04 | 4.70E+03 | 8.91E+03 | 5.38E+03 | 1.13E+04 | 9.00E+00 | 9.00E+00 | 9.00E+00 |
| 4.52E+03 | 9.00E+00 | 1.97E+03 | 9.00E+00 | 1.99E+03 | 9.86E+02 | 9.92E+02 | 9.00E+00 | 9.00E+00 |
| 5.07E+02 | 9.00E+00 | 1.49E+03 | 9.00E+00 | 2.96E+03 | 9.00E+00 | 5.11E+02 | 9.00E+00 | 1.49E+03 |
| 9.00E+00 | 1.48E+03 | 9.00E+00 | 9.00E+00 | 9.00E+00 | 1.47E+03 | 9.00E+00 | 9.00E+00 | 9.00E+00 |
| 2.72E+03 | 9.00E+00 | 3.28E+03 | 9.00E+00 | 1.48E+03 | 9.00E+00 | 9.00E+00 | 9.00E+00 | 5.11E+02 |
| 9.76E+04 | 2.14E+05 | 1.54E+05 | 1.54E+05 | 1.76E+05 | 1.35E+05 | 2.61E+05 | 1.28E+05 | 1.67E+05 |
| 3.41E+04 | 9.43E+03 | 1.81E+04 | 2.10E+04 | 5.57E+03 | 2.26E+04 | 1.11E+04 | 8.58E+03 | 1.47E+04 |
| 2.47E+03 | 8.44E+03 | 6.15E+03 | 9.90E+03 | 1.33E+04 | 1.57E+04 | 4.31E+03 | 9.00E+00 | 9.00E+00 |
| 1.76E+04 | 2.40E+04 | 1.63E+04 | 2.76E+04 | 2.42E+04 | 3.58E+04 | 1.94E+04 | 3.48E+04 | 1.68E+04 |
| 4.51E+05 | 4.64E+05 | 5.13E+05 | 4.72E+05 | 4.21E+05 | 4.92E+05 | 4.23E+05 | 4.88E+05 | 4.73E+05 |
| 1.90E+05 | 1.97E+05 | 1.72E+05 | 1.71E+05 | 1.59E+05 | 1.71E+05 | 2.29E+05 | 2.06E+05 | 1.98E+05 |
| 3.14E+04 | 5.83E+03 | 1.10E+04 | 1.89E+04 | 1.26E+04 | 2.38E+04 | 3.33E+04 | 1.47E+04 | 2.11E+04 |
| 1.27E+05 | 1.70E+05 | 1.19E+05 | 1.34E+05 | 1.21E+05 | 1.32E+05 | 1.95E+05 | 1.21E+05 | 1.27E+05 |
| 7.69E+04 | 8.16E+04 | 4.34E+04 | 6.55E+04 | 1.33E+05 | 6.31E+04 | 1.24E+05 | 8.04E+04 | 8.33E+04 |
| 9.00E+00 | 9.00E+00 | 2.78E+03 | 9.00E+00 | 9.00E+00 | 9.00E+00 | 9.00E+00 | 9.00E+00 | 9.00E+00 |
| 3.25E+03 | 6.32E+03 | 7.07E+03 | 4.77E+03 | 2.39E+03 | 7.25E+03 | 8.00E+03 | 8.13E+03 | 5.12E+03 |
| 4.76E+03 | 1.25E+04 | 7.93E+03 | 1.04E+04 | 1.17E+04 | 4.74E+03 | 1.62E+04 | 1.26E+04 | 6.52E+03 |
| 9.00E+00 | 9.00E+00 | 9.00E+00 | 9.00E+00 | 9.00E+00 | 9.00E+00 | 1.03E+04 | 9.00E+00 | 9.00E+00 |
| 1.94E+05 | 1.52E+05 | 1.29E+05 | 1.76E+05 | 1.30E+05 | 1.74E+05 | 2.04E+05 | 2.04E+05 | 2.04E+05 |
| 9.00E+00 | 3.88E+03 | 9.00E+00 | 9.00E+00 | 7.14E+03 | 9.00E+00 | 4.00E+03 | 9.00E+00 | 9.00E+00 |
| 9.00E+00 |
| 1.78E+05 | 1.53E+05 | 1.14E+05 | 1.36E+05 | 1.36E+05 | 1.78E+05 | 1.54E+05 | 1.71E+05 | 1.23E+05 |
| 9.00E+00 | 9.00E+00 | 9.00E+00 | 9.00E+00 | 9.00E+00 | 9.00E+00 | 7.29E+03 | 9.00E+00 | 4.24E+03 |
| 7.72E+03 | 2.93E+03 | 4.07E+03 | 5.85E+03 | 3.08E+03 | 2.00E+03 | 9.00E+00 | 9.00E+00 | 9.00E+00 |



|          |          |          |          |          |          |          |          |          |
|----------|----------|----------|----------|----------|----------|----------|----------|----------|
| 9.00E+00 | 4.37E+03 | 6.53E+03 | 9.00E+00 | 9.00E+00 | 2.20E+03 | 9.00E+00 | 9.00E+00 | 1.06E+03 |
| 9.00E+00 |
| 4.17E+04 | 5.21E+04 | 9.18E+03 | 7.97E+04 | 6.97E+04 | 4.78E+04 | 3.93E+04 | 1.80E+04 | 2.95E+04 |
| 5.24E+03 | 1.99E+03 | 1.57E+03 | 8.76E+03 | 7.63E+03 | 1.10E+04 | 9.00E+00 | 9.00E+00 | 9.00E+00 |
| 9.00E+00 | 9.00E+00 | 9.00E+00 | 9.00E+00 | 9.00E+00 | 1.68E+04 | 9.00E+00 | 9.00E+00 | 9.00E+00 |
| 9.00E+00 |
| 9.00E+00 | 9.00E+00 | 9.00E+00 | 9.00E+00 | 3.17E+03 | 9.00E+00 | 2.07E+03 | 9.00E+00 | 9.00E+00 |
| 7.34E+04 | 6.91E+04 | 2.60E+04 | 7.69E+04 | 4.52E+04 | 6.61E+04 | 2.08E+04 | 8.13E+03 | 9.00E+00 |
| 9.00E+00 | 9.00E+00 | 9.00E+00 | 9.00E+00 | 9.00E+00 | 2.00E+03 | 9.00E+00 | 9.00E+00 | 9.00E+00 |
| 5.75E+03 | 2.32E+03 | 3.42E+03 | 9.64E+02 | 2.97E+03 | 3.36E+03 | 2.93E+03 | 3.77E+03 | 4.16E+03 |
| 2.27E+03 | 1.77E+03 | 1.35E+03 | 4.94E+03 | 9.00E+00 | 1.36E+03 | 9.00E+00 | 9.00E+00 | 4.49E+03 |
| 1.05E+04 | 5.61E+03 | 9.00E+00 | 5.58E+03 | 5.55E+03 | 5.94E+03 | 2.02E+03 | 4.68E+03 | 9.80E+02 |
| 9.12E+02 | 9.00E+00 | 9.00E+00 | 9.00E+00 | 1.35E+03 | 9.00E+00 | 5.51E+03 | 9.00E+00 | 9.00E+00 |
| 1.26E+04 | 1.05E+04 | 9.00E+00 | 4.81E+03 | 9.37E+03 | 1.50E+04 | 3.75E+03 | 4.82E+03 | 2.73E+03 |
| 9.00E+00 | 5.10E+02 | 9.00E+00 | 1.49E+03 | 9.00E+00 | 9.00E+00 | 9.00E+00 | 9.79E+02 | 9.00E+00 |
| 8.63E+04 | 7.99E+04 | 5.57E+04 | 1.05E+05 | 2.97E+04 | 6.06E+04 | 8.96E+04 | 6.84E+04 | 1.09E+05 |
| 3.59E+03 | 9.00E+00 |
| 1.35E+04 | 1.69E+04 | 2.45E+03 | 2.83E+04 | 1.43E+04 | 1.69E+04 | 6.64E+03 | 5.13E+03 | 2.55E+03 |
| 4.09E+03 | 7.61E+03 | 3.02E+03 | 7.74E+03 | 1.53E+03 | 1.98E+03 | 2.03E+03 | 2.53E+03 | 3.61E+03 |
| 9.00E+00 | 9.00E+00 | 9.11E+02 | 9.00E+00 | 3.60E+03 | 9.00E+00 | 9.00E+00 | 3.10E+03 | 2.25E+03 |
| 2.35E+04 | 2.59E+04 | 4.68E+04 | 3.13E+04 | 2.25E+04 | 2.89E+04 | 2.99E+04 | 1.41E+04 | 3.16E+04 |
| 5.30E+04 | 6.80E+04 | 6.49E+04 | 6.37E+04 | 5.97E+04 | 5.05E+04 | 6.59E+04 | 3.15E+04 | 6.42E+04 |
| 2.32E+03 | 3.75E+03 | 2.78E+03 | 1.88E+03 | 9.00E+00 | 4.88E+03 | 9.00E+00 | 9.00E+00 | 5.00E+02 |
| 9.00E+00 | 9.00E+00 | 9.00E+00 | 4.41E+03 | 9.00E+00 | 1.98E+03 | 9.00E+00 | 9.00E+00 | 8.71E+02 |
| 9.00E+00 | 1.96E+03 | 9.00E+00 | 9.00E+00 | 9.00E+00 | 9.00E+00 | 3.58E+03 | 2.01E+03 | 9.00E+00 |
| 2.48E+03 | 9.00E+00 | 9.00E+00 | 1.48E+03 | 1.96E+03 | 1.01E+03 | 2.93E+03 | 9.96E+02 | 9.00E+00 |
| 5.03E+03 | 2.24E+03 | 2.80E+03 | 3.93E+03 | 2.53E+03 | 6.13E+03 | 2.27E+03 | 7.30E+03 | 2.29E+03 |
| 9.00E+00 | 9.00E+00 | 9.00E+00 | 9.00E+00 | 2.15E+04 | 9.00E+00 | 9.00E+00 | 9.00E+00 | 1.56E+04 |
| 9.00E+00 | 9.00E+00 | 9.00E+00 | 9.00E+00 | 9.00E+00 | 4.16E+03 | 9.00E+00 | 9.00E+00 | 9.00E+00 |
| 2.02E+04 | 9.00E+00 | 8.71E+03 | 1.80E+04 | 1.31E+04 | 9.00E+00 | 1.80E+04 | 9.00E+00 | 9.00E+00 |
| 9.00E+00 |
| 9.00E+00 |
| 3.11E+04 | 2.11E+04 | 1.06E+04 | 1.75E+04 | 1.42E+04 | 1.06E+04 | 1.85E+04 | 2.08E+04 | 2.11E+04 |
| 1.63E+03 | 9.00E+00 | 9.00E+00 | 9.00E+00 | 3.70E+03 | 1.09E+03 | 9.00E+00 | 2.15E+03 | 9.00E+00 |
| 9.00E+00 | 9.00E+00 | 1.25E+03 | 9.00E+00 | 9.00E+00 | 9.00E+00 | 9.00E+00 | 9.00E+00 | 9.00E+00 |
| 9.00E+00 |
| 9.00E+00 |
| 9.00E+00 | 9.00E+00 | 9.00E+00 | 9.00E+00 | 9.00E+00 | 1.36E+03 | 9.00E+00 | 9.00E+00 | 9.00E+00 |
| 1.05E+05 | 1.30E+05 | 1.02E+05 | 1.19E+05 | 1.01E+05 | 1.15E+05 | 1.01E+05 | 1.08E+05 | 1.22E+05 |
| 2.14E+04 | 2.01E+04 | 2.18E+04 | 1.64E+04 | 1.52E+04 | 2.44E+04 | 1.28E+04 | 2.71E+04 | 1.87E+04 |
| 1.94E+04 | 1.07E+04 | 1.30E+04 | 9.00E+00 | 3.04E+04 | 9.71E+03 | 1.02E+04 | 1.35E+04 | 9.66E+03 |
| 2.43E+03 | 2.10E+03 | 9.00E+00 | 9.00E+00 | 9.00E+00 | 9.00E+00 | 1.12E+03 | 9.00E+00 | 9.00E+00 |
| 5.52E+04 | 4.43E+04 | 4.76E+04 | 6.23E+04 | 3.28E+04 | 4.46E+04 | 5.36E+04 | 4.25E+04 | 6.53E+04 |
| 1.29E+04 | 2.75E+03 | 1.25E+04 | 7.96E+03 | 1.33E+04 | 8.85E+03 | 2.13E+04 | 1.10E+04 | 1.16E+04 |
| 2.94E+04 | 2.84E+04 | 7.60E+03 | 1.64E+04 | 1.19E+04 | 2.47E+04 | 1.51E+04 | 2.67E+04 | 2.38E+04 |
| 9.00E+00 | 2.19E+03 | 9.00E+00 | 9.00E+00 | 9.00E+00 | 9.00E+00 | 1.78E+03 | 9.00E+00 | 9.00E+00 |
| 9.00E+00 | 9.00E+00 | 1.82E+03 | 9.00E+00 | 9.00E+00 | 9.83E+03 | 9.00E+00 | 9.00E+00 | 9.00E+00 |
| 7.19E+03 | 3.94E+03 | 8.59E+03 | 1.36E+03 | 9.00E+00 | 1.77E+03 | 8.89E+02 | 3.23E+03 | 3.65E+03 |
| 9.00E+00 | 4.09E+03 | 9.00E+00 | 2.28E+03 | 4.11E+03 | 2.25E+03 | 3.65E+03 | 9.00E+00 | 9.00E+00 |
| 9.00E+00 | 9.00E+00 | 9.00E+00 | 2.31E+03 | 3.70E+03 | 9.00E+00 | 9.00E+00 | 1.85E+03 | 9.00E+00 |
| 9.00E+00 |
| 7.21E+03 | 1.09E+04 | 1.20E+04 | 6.48E+03 | 1.07E+04 | 9.41E+03 | 6.48E+03 | 6.08E+03 | 5.77E+03 |
| 5.77E+04 | 1.50E+05 | 1.13E+05 | 4.47E+04 | 2.66E+04 | 2.77E+05 | 3.72E+04 | 3.22E+05 | 1.55E+05 |
| 1.89E+04 | 3.06E+04 | 4.42E+04 | 3.05E+04 | 2.60E+04 | 9.02E+04 | 1.94E+04 | 4.91E+04 | 2.41E+04 |

|          |          |          |          |          |          |          |          |          |
|----------|----------|----------|----------|----------|----------|----------|----------|----------|
| 9.00E+00 | 6.79E+02 | 9.00E+00 |
| 9.00E+00 |
| 9.00E+00 |
| 9.00E+00 | 8.88E+04 | 3.88E+04 | 7.39E+04 | 7.30E+04 | 9.98E+04 | 6.48E+04 | 9.54E+04 | 7.54E+04 |

| /mpj     | MRL/lpr  |          |          |          |          |          |          |          |    |
|----------|----------|----------|----------|----------|----------|----------|----------|----------|----|
|          | C4       | C5       | C6       | S1       | S2       | S3       | S4       | S5       | S6 |
| 1.45E+03 | 2.11E+03 | 1.09E+03 | 3.19E+04 | 8.01E+03 | 9.45E+04 | 1.55E+04 | 2.03E+04 | 3.92E+04 |    |
| 9.61E+04 | 4.68E+04 | 3.34E+04 | 8.93E+04 | 4.00E+04 | 3.16E+05 | 9.51E+04 | 8.71E+04 | 1.93E+05 |    |
| 1.35E+04 | 1.05E+04 | 1.08E+04 | 2.26E+04 | 1.66E+04 | 2.53E+04 | 2.12E+04 | 1.60E+04 | 2.17E+04 |    |
| 1.85E+03 | 1.98E+03 | 1.83E+03 | 3.80E+03 | 3.07E+03 | 5.10E+03 | 2.91E+03 | 2.83E+03 | 3.52E+03 |    |
| 4.50E+04 | 4.10E+04 | 4.32E+04 | 6.24E+04 | 4.88E+04 | 6.86E+04 | 5.70E+04 | 4.13E+04 | 5.68E+04 |    |
| 3.79E+03 | 2.63E+03 | 3.12E+03 | 1.53E+05 | 9.37E+04 | 1.54E+05 | 1.55E+05 | 1.24E+05 | 1.34E+05 |    |
| 9.00E+00 | 9.00E+00 | 9.00E+00 | 3.60E+05 | 1.98E+05 | 2.80E+05 | 1.63E+05 | 2.03E+05 | 1.90E+05 |    |
| 3.35E+03 | 1.36E+03 | 1.13E+03 | 1.44E+04 | 8.85E+03 | 5.10E+04 | 1.07E+04 | 1.09E+04 | 2.17E+04 |    |
| 9.00E+00 | 9.00E+00 | 9.00E+00 | 3.83E+04 | 2.77E+04 | 3.10E+04 | 2.13E+04 | 5.22E+04 | 2.38E+04 |    |
| 9.00E+00 | 9.00E+00 | 9.00E+00 | 9.00E+00 | 9.00E+00 | 1.96E+05 | 9.00E+00 | 1.77E+05 | 9.00E+00 |    |
| 9.00E+00 | 9.00E+00 | 9.00E+00 | 1.82E+04 | 1.62E+04 | 2.35E+04 | 1.93E+04 | 1.53E+04 | 1.79E+04 |    |
| 2.38E+03 | 1.79E+03 | 2.25E+03 | 1.40E+05 | 8.38E+04 | 1.20E+05 | 1.49E+05 | 1.06E+05 | 1.13E+05 |    |
| 4.70E+03 | 4.32E+03 | 7.36E+03 | 1.03E+04 | 1.47E+04 | 1.36E+04 | 1.97E+03 | 1.96E+04 | 1.62E+04 |    |
| 2.33E+04 | 1.58E+04 | 3.00E+04 | 7.43E+04 | 1.20E+05 | 6.24E+04 | 1.75E+05 | 1.61E+05 | 1.61E+05 |    |
| 2.60E+03 | 3.05E+03 | 1.30E+03 | 5.77E+04 | 8.22E+04 | 6.59E+04 | 9.09E+04 | 9.54E+04 | 8.91E+04 |    |
| 5.04E+04 | 4.61E+04 | 6.02E+04 | 2.57E+05 | 2.40E+05 | 4.09E+05 | 2.31E+05 | 4.40E+05 | 2.92E+05 |    |
| 9.98E+02 | 9.33E+03 | 9.00E+00 | 4.21E+04 | 8.01E+04 | 3.87E+04 | 1.37E+05 | 7.98E+04 | 5.47E+04 |    |
| 9.00E+00 | 9.00E+00 | 9.00E+00 | 2.32E+04 | 1.86E+04 | 9.44E+03 | 2.29E+04 | 2.36E+04 | 1.50E+04 |    |
| 9.00E+00 | 9.00E+00 | 9.00E+00 | 2.16E+04 | 4.42E+04 | 3.55E+04 | 4.35E+04 | 4.32E+04 | 1.73E+04 |    |
| 1.59E+04 | 2.68E+04 | 1.57E+04 | 2.06E+05 | 2.01E+05 | 2.13E+05 | 3.34E+05 | 3.74E+05 | 2.87E+05 |    |
| 2.18E+03 | 9.60E+02 | 2.43E+03 | 1.36E+04 | 1.65E+04 | 8.32E+03 | 1.57E+04 | 1.88E+04 | 1.12E+04 |    |
| 2.02E+04 | 2.99E+04 | 2.82E+04 | 1.98E+04 | 3.42E+04 | 9.67E+03 | 4.39E+04 | 4.08E+04 | 2.78E+04 |    |
| 8.55E+04 | 1.05E+05 | 9.25E+04 | 8.20E+04 | 6.57E+04 | 9.09E+04 | 1.56E+05 | 6.71E+04 | 6.25E+04 |    |
| 2.50E+03 | 6.08E+03 | 4.06E+03 | 2.18E+04 | 2.61E+04 | 2.30E+04 | 1.31E+04 | 2.13E+04 | 1.41E+04 |    |
| 5.92E+04 | 9.24E+04 | 1.08E+05 | 6.49E+04 | 1.48E+05 | 2.54E+05 | 1.47E+05 | 5.11E+04 | 3.38E+04 |    |
| 1.57E+06 | 2.05E+06 | 2.13E+06 | 2.27E+06 | 1.82E+06 | 2.19E+06 | 1.15E+06 | 1.53E+06 | 1.36E+06 |    |
| 8.10E+03 | 5.44E+03 | 6.42E+03 | 1.41E+05 | 1.36E+05 | 1.18E+05 | 1.32E+05 | 2.10E+05 | 1.52E+05 |    |
| 9.00E+00 | 2.63E+03 | 9.00E+00 | 1.04E+05 | 1.13E+05 | 7.97E+04 | 1.69E+04 | 1.73E+05 | 1.00E+05 |    |
| 9.00E+00 | 9.00E+00 | 9.00E+00 | 1.48E+04 | 1.78E+04 | 1.94E+04 | 7.24E+03 | 2.89E+04 | 1.50E+04 |    |
| 4.96E+03 | 3.32E+03 | 5.77E+03 | 5.26E+04 | 5.95E+04 | 4.78E+04 | 7.29E+04 | 7.53E+04 | 7.81E+04 |    |
| 1.11E+04 | 7.79E+03 | 1.23E+04 | 6.95E+05 | 7.40E+05 | 5.35E+05 | 4.14E+05 | 1.15E+06 | 9.79E+05 |    |
| 1.47E+04 | 1.95E+04 | 1.08E+04 | 9.47E+05 | 1.03E+06 | 6.00E+05 | 1.10E+06 | 1.34E+06 | 1.27E+06 |    |
| 9.00E+00 | 9.00E+00 | 9.00E+00 | 6.01E+04 | 5.27E+04 | 2.57E+04 | 6.14E+04 | 5.32E+04 | 5.91E+04 |    |
| 9.00E+00 | 9.00E+00 | 9.00E+00 | 7.57E+03 | 6.79E+03 | 4.81E+03 | 5.16E+03 | 1.12E+04 | 6.41E+03 |    |
| 9.00E+00 | 9.00E+00 | 9.00E+00 | 2.67E+04 | 2.06E+04 | 1.89E+04 | 2.79E+04 | 2.25E+04 | 4.42E+04 |    |
| 4.19E+03 | 8.73E+03 | 3.32E+03 | 9.68E+04 | 1.30E+05 | 1.15E+05 | 1.20E+05 | 1.04E+05 | 1.42E+05 |    |
| 6.08E+04 | 7.50E+04 | 6.45E+04 | 4.47E+05 | 4.05E+05 | 3.14E+05 | 9.10E+05 | 3.66E+05 | 5.45E+05 |    |
| 4.53E+03 | 6.39E+03 | 1.92E+03 | 1.55E+05 | 1.60E+05 | 1.63E+05 | 1.68E+05 | 1.18E+05 | 1.90E+05 |    |
| 8.00E+03 | 1.50E+03 | 6.41E+03 | 1.08E+04 | 1.26E+04 | 1.44E+04 | 2.30E+04 | 1.59E+04 | 1.69E+04 |    |
| 5.38E+04 | 2.47E+04 | 6.28E+04 | 1.15E+06 | 1.06E+06 | 1.14E+06 | 1.18E+06 | 1.49E+06 | 1.15E+06 |    |
| 9.00E+00 | 9.00E+00 | 9.00E+00 | 2.41E+03 | 2.14E+03 | 1.80E+03 | 3.04E+03 | 1.94E+03 | 3.59E+03 |    |
| 1.08E+04 | 3.19E+04 | 1.62E+04 | 1.69E+04 | 9.00E+00 | 1.92E+04 | 2.61E+04 | 1.01E+04 | 2.24E+04 |    |
| 9.00E+00 | 8.64E+03 | 4.26E+03 | 2.24E+04 | 1.53E+04 | 3.49E+04 | 1.56E+04 | 2.50E+04 | 2.52E+04 |    |
| 9.00E+00 | 1.07E+05 | 1.81E+04 | 3.69E+05 | 2.41E+05 | 3.27E+05 | 2.70E+05 | 2.99E+05 | 1.80E+05 |    |
| 5.92E+04 | 6.03E+04 | 4.51E+04 | 1.02E+04 | 9.00E+00 | 1.32E+04 | 9.00E+00 | 9.00E+00 | 9.00E+00 |    |
| 1.04E+04 | 1.79E+04 | 9.00E+00 | 2.33E+04 | 1.50E+04 | 2.21E+04 | 2.52E+04 | 9.00E+00 | 1.61E+04 |    |
| 3.41E+05 | 3.55E+05 | 3.22E+05 | 3.81E+05 | 3.28E+05 | 3.97E+05 | 3.63E+05 | 3.60E+05 | 3.46E+05 |    |
| 2.06E+04 | 2.54E+04 | 1.90E+04 | 9.00E+00 | 9.00E+00 | 9.00E+00 | 9.00E+00 | 9.00E+00 | 9.00E+00 |    |
| 3.93E+04 | 4.21E+04 | 4.92E+04 | 8.33E+03 | 3.09E+03 | 2.71E+04 | 4.20E+03 | 4.76E+03 | 1.15E+04 |    |
| 1.91E+06 | 2.14E+06 | 1.54E+06 | 5.39E+04 | 2.07E+04 | 2.38E+05 | 3.09E+04 | 3.38E+04 | 4.00E+04 |    |

|          |          |          |          |          |          |          |          |          |
|----------|----------|----------|----------|----------|----------|----------|----------|----------|
| 8.92E+04 | 9.36E+04 | 8.19E+04 | 2.37E+04 | 1.25E+04 | 2.31E+04 | 1.84E+04 | 1.60E+04 | 1.42E+04 |
| 2.15E+04 | 2.69E+04 | 2.03E+04 | 7.07E+03 | 1.04E+04 | 2.67E+04 | 5.44E+03 | 7.27E+03 | 1.03E+04 |
| 5.98E+04 | 6.45E+04 | 5.21E+04 | 1.62E+04 | 7.90E+03 | 3.85E+04 | 1.23E+04 | 7.60E+03 | 1.38E+04 |
| 8.66E+03 | 1.26E+04 | 8.78E+03 | 9.00E+00 | 7.18E+03 | 9.00E+00 | 9.00E+00 | 9.00E+00 | 9.00E+00 |
| 2.58E+05 | 2.88E+05 | 2.79E+05 | 3.53E+05 | 1.48E+05 | 5.52E+05 | 2.95E+05 | 1.14E+05 | 2.35E+05 |
| 6.37E+06 | 7.03E+06 | 5.36E+06 | 1.15E+06 | 5.98E+05 | 4.76E+06 | 7.52E+05 | 5.57E+05 | 9.56E+05 |
| 6.52E+05 | 7.30E+05 | 5.40E+05 | 1.90E+05 | 6.54E+04 | 3.20E+05 | 4.03E+04 | 5.58E+04 | 7.27E+04 |
| 1.13E+05 | 1.09E+05 | 1.16E+05 | 4.82E+04 | 3.80E+04 | 1.24E+05 | 2.38E+04 | 3.39E+04 | 5.44E+04 |
| 1.69E+04 | 1.79E+04 | 2.15E+04 | 9.00E+00 | 9.00E+00 | 1.95E+04 | 9.00E+00 | 4.87E+03 | 9.00E+00 |
| 8.22E+04 | 8.55E+04 | 6.28E+04 | 1.96E+04 | 1.53E+04 | 9.11E+04 | 3.32E+04 | 1.56E+04 | 2.30E+04 |
| 5.57E+04 | 6.09E+04 | 4.79E+04 | 9.00E+00 | 9.00E+00 | 9.00E+00 | 9.00E+00 | 9.00E+00 | 9.00E+00 |
| 1.11E+05 | 1.06E+05 | 9.49E+04 | 2.03E+05 | 1.10E+05 | 2.95E+05 | 3.47E+05 | 9.93E+04 | 1.88E+05 |
| 3.05E+06 | 2.94E+06 | 1.99E+06 | 5.93E+05 | 5.04E+05 | 3.72E+06 | 8.79E+05 | 5.28E+05 | 5.51E+05 |
| 4.27E+06 | 4.23E+06 | 3.34E+06 | 1.00E+06 | 3.92E+05 | 1.76E+06 | 4.56E+05 | 3.19E+05 | 5.05E+05 |
| 3.25E+05 | 3.54E+05 | 3.54E+05 | 3.22E+05 | 1.41E+05 | 4.54E+05 | 2.13E+05 | 1.02E+05 | 2.02E+05 |
| 2.15E+05 | 2.95E+05 | 1.93E+05 | 1.08E+06 | 5.24E+05 | 8.40E+05 | 8.33E+05 | 4.20E+05 | 6.77E+05 |
| 3.79E+04 | 6.03E+04 | 6.09E+04 | 5.24E+05 | 2.53E+05 | 3.75E+05 | 5.19E+05 | 2.10E+05 | 4.44E+05 |
| 2.70E+04 | 1.79E+04 | 2.56E+04 | 1.36E+04 | 9.00E+00 | 1.01E+04 | 4.99E+03 | 9.00E+00 | 5.04E+03 |
| 9.00E+00 | 9.00E+00 | 9.00E+00 | 2.62E+04 | 4.37E+04 | 5.52E+04 | 4.20E+04 | 2.82E+04 | 5.92E+04 |
| 1.40E+05 | 8.19E+04 | 5.58E+04 | 1.34E+05 | 9.26E+04 | 6.19E+05 | 4.30E+05 | 2.26E+05 | 2.04E+05 |
| 6.96E+04 | 6.43E+04 | 5.20E+04 | 2.69E+04 | 1.35E+04 | 2.15E+05 | 3.20E+04 | 1.51E+04 | 2.35E+04 |
| 5.06E+04 | 4.72E+04 | 2.63E+04 | 5.83E+04 | 4.42E+04 | 5.34E+04 | 2.14E+04 | 3.05E+04 | 2.56E+04 |
| 1.34E+06 | 1.45E+06 | 1.18E+06 | 7.96E+05 | 5.37E+05 | 7.14E+05 | 8.98E+05 | 4.19E+05 | 5.02E+05 |
| 5.87E+04 | 5.81E+04 | 6.21E+04 | 6.24E+04 | 3.18E+04 | 3.72E+04 | 5.88E+04 | 1.21E+04 | 3.74E+04 |
| 9.00E+00 | 9.00E+00 | 9.00E+00 | 1.01E+05 | 8.96E+04 | 1.12E+05 | 1.34E+05 | 1.76E+05 | 9.98E+04 |
| 9.00E+00 | 9.00E+00 | 9.00E+00 | 1.38E+05 | 1.23E+05 | 1.29E+05 | 2.23E+05 | 1.66E+05 | 2.15E+05 |
| 9.00E+00 | 9.00E+00 | 9.00E+00 | 2.88E+04 | 3.17E+04 | 6.37E+04 | 7.02E+04 | 5.62E+04 | 4.90E+04 |
| 7.85E+04 | 9.08E+04 | 7.71E+04 | 2.63E+05 | 2.71E+05 | 5.36E+05 | 1.85E+05 | 3.83E+05 | 2.37E+05 |
| 6.73E+03 | 6.66E+03 | 5.94E+03 | 3.03E+04 | 2.78E+04 | 1.56E+05 | 1.24E+05 | 2.19E+04 | 7.04E+04 |
| 1.12E+04 | 5.59E+03 | 4.22E+03 | 9.00E+00 | 9.00E+00 | 1.53E+04 | 9.00E+00 | 9.00E+00 | 9.00E+00 |
| 7.65E+04 | 4.41E+04 | 3.20E+04 | 9.00E+00 | 9.00E+00 | 3.95E+04 | 9.00E+00 | 9.00E+00 | 7.45E+03 |
| 1.94E+04 | 1.75E+04 | 1.43E+04 | 9.00E+00 | 9.00E+00 | 1.69E+04 | 1.21E+04 | 9.00E+00 | 9.00E+00 |
| 1.01E+05 | 1.13E+05 | 9.46E+04 | 1.19E+05 | 8.38E+04 | 7.12E+04 | 1.35E+05 | 4.54E+04 | 7.48E+04 |
| 7.06E+05 | 1.33E+06 | 1.02E+06 | 2.40E+05 | 1.23E+05 | 4.53E+05 | 8.01E+05 | 1.70E+05 | 2.59E+05 |
| 1.05E+05 | 1.41E+05 | 1.14E+05 | 2.46E+05 | 1.05E+05 | 2.08E+05 | 2.25E+05 | 1.13E+05 | 1.63E+05 |
| 3.90E+04 | 6.75E+04 | 5.18E+04 | 2.93E+05 | 2.76E+05 | 2.76E+05 | 2.40E+05 | 2.09E+05 | 1.80E+05 |
| 4.82E+04 | 8.46E+04 | 6.14E+04 | 3.27E+05 | 3.06E+05 | 3.02E+05 | 2.90E+05 | 2.34E+05 | 2.14E+05 |
| 5.78E+04 | 4.45E+05 | 1.17E+05 | 8.36E+04 | 6.16E+04 | 1.29E+05 | 3.01E+05 | 5.67E+04 | 5.59E+04 |
| 5.16E+04 | 6.69E+04 | 6.25E+04 | 1.52E+05 | 1.29E+05 | 1.59E+05 | 1.49E+05 | 1.29E+05 | 1.04E+05 |
| 5.89E+04 | 8.20E+04 | 6.59E+04 | 1.46E+05 | 1.06E+05 | 1.41E+05 | 1.29E+05 | 1.13E+05 | 8.17E+04 |
| 1.90E+06 | 1.85E+06 | 1.95E+06 | 1.99E+06 | 1.71E+06 | 2.19E+06 | 1.98E+06 | 1.92E+06 | 1.96E+06 |
| 1.21E+04 | 7.60E+04 | 2.07E+04 | 6.84E+04 | 5.70E+04 | 6.82E+04 | 6.59E+04 | 5.90E+04 | 5.32E+04 |
| 8.09E+06 | 8.11E+06 | 8.25E+06 | 8.64E+06 | 7.68E+06 | 8.68E+06 | 8.65E+06 | 7.84E+06 | 8.03E+06 |
| 5.17E+05 | 4.95E+05 | 5.07E+05 | 5.07E+05 | 4.68E+05 | 5.62E+05 | 5.10E+05 | 4.88E+05 | 4.86E+05 |
| 9.00E+00 | 2.23E+04 | 9.00E+00 | 6.41E+04 | 4.28E+04 | 1.02E+05 | 4.88E+04 | 6.84E+04 | 4.92E+04 |
| 1.97E+04 | 3.37E+04 | 1.54E+04 | 2.96E+04 | 1.81E+04 | 2.17E+04 | 2.74E+04 | 3.31E+04 | 1.46E+04 |
| 8.07E+03 | 1.89E+04 | 6.18E+03 | 1.84E+04 | 1.14E+04 | 1.98E+04 | 1.91E+04 | 1.87E+04 | 1.09E+04 |
| 1.55E+04 | 6.91E+04 | 2.38E+04 | 3.05E+04 | 2.18E+04 | 1.43E+04 | 4.63E+04 | 4.67E+04 | 2.09E+04 |
| 9.00E+00 | 5.87E+04 | 9.00E+00 | 2.04E+04 | 1.20E+04 | 1.55E+04 | 3.93E+04 | 1.07E+04 | 1.39E+04 |
| 5.82E+04 | 5.47E+04 | 5.10E+04 | 4.40E+04 | 3.15E+04 | 4.54E+04 | 2.83E+04 | 5.01E+04 | 3.36E+04 |
| 6.98E+03 | 9.00E+00 | 9.00E+00 | 5.35E+04 | 4.71E+04 | 5.70E+04 | 3.14E+04 | 6.10E+04 | 2.47E+04 |
| 4.32E+04 | 6.15E+04 | 5.94E+04 | 2.51E+05 | 2.69E+05 | 3.66E+05 | 3.38E+05 | 3.57E+05 | 3.21E+05 |
| 4.44E+03 | 4.49E+03 | 1.03E+04 | 3.41E+04 | 3.25E+04 | 3.16E+04 | 3.15E+04 | 4.09E+04 | 3.45E+04 |
| 8.70E+04 | 9.40E+04 | 1.14E+05 | 5.79E+03 | 6.54E+03 | 1.52E+04 | 9.63E+03 | 1.37E+04 | 6.57E+03 |



|          |          |          |          |          |          |          |          |          |
|----------|----------|----------|----------|----------|----------|----------|----------|----------|
| 7.39E+04 | 1.24E+05 | 7.77E+04 | 1.36E+04 | 5.97E+03 | 2.77E+04 | 2.73E+03 | 1.46E+04 | 9.09E+03 |
| 1.28E+04 | 2.08E+04 | 8.10E+03 | 6.04E+04 | 4.30E+04 | 5.91E+04 | 2.50E+04 | 4.43E+04 | 3.60E+04 |
| 6.92E+03 | 5.15E+03 | 6.78E+02 | 5.48E+04 | 5.50E+04 | 3.69E+04 | 4.03E+04 | 5.06E+04 | 4.54E+04 |
| 5.87E+03 | 2.05E+03 | 9.00E+00 | 8.81E+04 | 6.51E+04 | 5.08E+04 | 4.14E+04 | 7.14E+04 | 5.79E+04 |
| 1.65E+04 | 1.38E+04 | 7.36E+03 | 1.62E+05 | 1.50E+05 | 1.34E+05 | 4.34E+04 | 8.64E+04 | 1.45E+05 |
| 7.20E+02 | 9.00E+00 | 9.00E+00 | 3.26E+04 | 2.69E+04 | 2.55E+04 | 2.37E+04 | 3.09E+04 | 5.07E+04 |
| 6.45E+03 | 1.42E+04 | 1.63E+04 | 2.41E+04 | 3.30E+04 | 2.47E+04 | 8.10E+03 | 2.74E+04 | 2.89E+04 |
| 5.44E+03 | 8.87E+03 | 1.95E+04 | 3.70E+04 | 2.85E+04 | 2.78E+04 | 2.69E+04 | 4.64E+04 | 4.17E+04 |
| 1.94E+04 | 1.87E+04 | 1.55E+04 | 5.03E+03 | 4.60E+03 | 9.88E+03 | 1.92E+04 | 1.09E+04 | 9.18E+03 |
| 8.90E+02 | 1.78E+03 | 3.92E+03 | 1.67E+04 | 1.98E+04 | 1.45E+04 | 5.23E+03 | 2.19E+04 | 5.73E+03 |
| 9.50E+04 | 1.05E+05 | 8.13E+04 | 1.59E+06 | 1.86E+06 | 1.51E+06 | 2.43E+06 | 2.43E+06 | 2.05E+06 |
| 8.25E+05 | 1.06E+06 | 1.05E+06 | 1.96E+05 | 1.92E+05 | 2.60E+05 | 1.85E+05 | 3.33E+05 | 1.58E+05 |
| 2.53E+04 | 2.31E+04 | 1.43E+04 | 1.27E+05 | 8.85E+04 | 1.47E+05 | 7.40E+04 | 1.61E+05 | 7.19E+04 |
| 9.00E+00 | 9.00E+00 | 5.11E+03 | 3.67E+04 | 3.68E+04 | 2.68E+04 | 3.29E+04 | 3.92E+04 | 2.53E+04 |
| 4.31E+04 | 5.42E+04 | 4.26E+04 | 9.00E+00 | 1.21E+04 | 1.46E+04 | 1.17E+04 | 1.06E+04 | 9.00E+00 |
| 1.36E+05 | 1.82E+05 | 9.24E+04 | 1.71E+05 | 1.83E+05 | 3.47E+05 | 2.70E+05 | 2.18E+05 | 1.80E+05 |
| 9.00E+00 | 9.00E+00 | 9.00E+00 | 1.55E+05 | 1.09E+05 | 1.17E+05 | 6.49E+04 | 1.23E+05 | 1.24E+05 |
| 6.18E+04 | 6.75E+04 | 4.46E+04 | 3.26E+06 | 2.87E+06 | 2.76E+06 | 2.56E+06 | 3.03E+06 | 2.98E+06 |
| 1.03E+05 | 1.21E+05 | 8.72E+04 | 3.48E+05 | 3.36E+05 | 7.04E+05 | 4.98E+05 | 3.79E+05 | 2.99E+05 |
| 9.00E+00 | 9.00E+00 | 9.00E+00 | 4.65E+03 | 1.28E+04 | 2.36E+04 | 3.57E+03 | 3.48E+04 | 7.16E+03 |
| 5.30E+04 | 5.45E+04 | 3.80E+04 | 4.21E+05 | 4.94E+05 | 5.58E+05 | 2.54E+05 | 6.20E+05 | 2.65E+05 |
| 1.11E+05 | 7.58E+04 | 7.42E+04 | 9.00E+00 | 9.00E+00 | 2.59E+03 | 9.00E+00 | 9.00E+00 | 9.00E+00 |
| 4.40E+05 | 6.54E+05 | 4.82E+05 | 7.94E+04 | 7.65E+04 | 9.64E+04 | 3.75E+04 | 1.73E+05 | 2.11E+04 |
| 5.52E+06 | 6.93E+06 | 5.64E+06 | 1.66E+05 | 1.19E+05 | 2.58E+05 | 1.10E+05 | 2.34E+05 | 8.87E+04 |
| 1.80E+06 | 1.75E+06 | 1.77E+06 | 4.37E+03 | 2.74E+03 | 1.56E+04 | 7.73E+03 | 5.75E+03 | 4.06E+03 |
| 2.61E+04 | 3.63E+04 | 3.21E+04 | 5.08E+04 | 4.52E+04 | 4.99E+04 | 4.72E+04 | 3.88E+04 | 5.10E+04 |
| 9.00E+00 | 1.99E+04 | 9.00E+00 | 4.92E+04 | 4.57E+04 | 3.95E+04 | 9.55E+03 | 8.03E+04 | 1.68E+04 |
| 1.84E+05 | 1.84E+05 | 1.58E+05 | 9.00E+00 | 9.00E+00 | 9.00E+00 | 9.00E+00 | 9.00E+00 | 9.00E+00 |
| 1.04E+04 | 2.38E+04 | 8.62E+03 | 3.46E+05 | 2.61E+05 | 2.58E+05 | 1.48E+05 | 3.97E+05 | 1.61E+05 |
| 9.00E+00 | 9.00E+00 | 9.00E+00 | 2.91E+04 | 2.13E+04 | 9.21E+04 | 1.23E+04 | 5.07E+04 | 3.22E+04 |
| 7.08E+03 | 1.55E+04 | 9.00E+00 | 1.18E+05 | 7.27E+04 | 1.08E+05 | 6.75E+04 | 1.34E+05 | 1.15E+05 |
| 1.17E+04 | 1.61E+04 | 1.37E+04 | 4.79E+05 | 3.53E+05 | 3.54E+05 | 2.20E+05 | 4.25E+05 | 2.65E+05 |
| 1.36E+05 | 2.07E+05 | 1.22E+05 | 1.11E+06 | 9.77E+05 | 9.59E+05 | 3.34E+05 | 1.28E+06 | 6.00E+05 |
| 9.41E+04 | 8.20E+04 | 7.32E+04 | 6.21E+04 | 1.02E+05 | 6.84E+04 | 3.01E+04 | 5.36E+04 | 6.57E+04 |
| 5.82E+04 | 4.05E+04 | 4.09E+04 | 1.25E+05 | 1.08E+05 | 1.34E+05 | 2.35E+05 | 1.59E+05 | 1.66E+05 |
| 2.39E+04 | 3.68E+04 | 2.10E+04 | 9.64E+04 | 1.09E+05 | 1.50E+05 | 8.96E+04 | 1.51E+05 | 3.39E+05 |
| 3.24E+04 | 2.13E+04 | 3.23E+04 | 4.91E+04 | 4.88E+04 | 2.03E+05 | 3.63E+04 | 5.27E+04 | 4.71E+04 |
| 1.41E+06 | 1.62E+06 | 1.47E+06 | 7.50E+06 | 7.01E+06 | 9.35E+06 | 9.27E+06 | 8.97E+06 | 7.69E+06 |
| 2.53E+04 | 4.44E+04 | 2.10E+04 | 1.13E+04 | 8.97E+03 | 1.66E+04 | 3.53E+04 | 1.38E+04 | 2.24E+04 |
| 1.36E+05 | 1.28E+05 | 1.20E+05 | 2.48E+05 | 2.32E+05 | 1.18E+06 | 2.16E+05 | 2.39E+05 | 1.84E+05 |
| 3.50E+05 | 3.62E+05 | 3.64E+05 | 2.04E+05 | 2.08E+05 | 2.50E+05 | 3.66E+05 | 3.02E+05 | 2.93E+05 |
| 9.35E+04 | 1.11E+05 | 9.10E+04 | 1.72E+04 | 2.08E+04 | 4.77E+04 | 2.74E+04 | 2.33E+04 | 1.70E+04 |
| 9.80E+07 | 1.39E+08 | 1.07E+08 | 3.15E+06 | 2.69E+06 | 5.47E+06 | 2.79E+06 | 5.23E+06 | 2.39E+06 |
| 1.36E+06 | 1.50E+06 | 1.12E+06 | 1.06E+04 | 2.17E+04 | 2.00E+04 | 3.86E+04 | 1.18E+04 | 1.42E+04 |
| 3.56E+05 | 5.31E+05 | 3.53E+05 | 1.96E+05 | 1.84E+05 | 1.72E+05 | 1.46E+05 | 3.12E+05 | 1.49E+05 |
| 1.01E+06 | 1.06E+06 | 1.20E+06 | 1.70E+06 | 1.17E+06 | 3.11E+06 | 1.00E+06 | 2.17E+06 | 1.11E+06 |
| 2.87E+06 | 3.35E+06 | 3.17E+06 | 1.15E+05 | 7.49E+04 | 1.04E+05 | 5.16E+04 | 1.69E+05 | 7.43E+04 |
| 6.71E+04 | 1.21E+05 | 5.49E+04 | 9.68E+05 | 6.97E+05 | 8.94E+05 | 6.32E+05 | 1.01E+06 | 6.60E+05 |
| 2.69E+05 | 4.32E+05 | 3.14E+05 | 4.26E+05 | 3.49E+05 | 3.77E+05 | 4.10E+05 | 5.77E+05 | 3.16E+05 |
| 5.19E+04 | 7.45E+04 | 4.81E+04 | 9.00E+00 | 9.00E+00 | 9.00E+00 | 9.00E+00 | 9.00E+00 | 9.00E+00 |
| 8.04E+05 | 1.58E+06 | 7.93E+05 | 1.25E+07 | 8.00E+06 | 1.13E+07 | 8.17E+06 | 1.41E+07 | 7.67E+06 |
| 1.07E+07 | 1.03E+07 | 1.12E+07 | 1.42E+06 | 9.22E+05 | 1.10E+06 | 6.22E+05 | 1.88E+06 | 8.79E+05 |
| 1.77E+05 | 1.98E+05 | 1.20E+05 | 5.36E+05 | 5.07E+05 | 5.50E+05 | 5.15E+05 | 7.57E+05 | 5.98E+05 |
| 3.61E+05 | 3.87E+05 | 4.37E+05 | 9.00E+00 | 9.00E+00 | 8.71E+03 | 9.00E+00 | 1.36E+04 | 9.00E+00 |

|          |          |          |          |          |          |          |          |          |
|----------|----------|----------|----------|----------|----------|----------|----------|----------|
| 5.25E+05 | 7.99E+05 | 5.34E+05 | 8.28E+06 | 7.33E+06 | 7.93E+06 | 8.00E+06 | 6.96E+06 | 8.21E+06 |
| 1.71E+06 | 1.89E+06 | 1.88E+06 | 1.59E+06 | 1.67E+06 | 1.29E+06 | 1.03E+06 | 1.80E+06 | 1.41E+06 |
| 4.37E+04 | 4.31E+04 | 2.19E+04 | 2.91E+04 | 2.01E+04 | 2.60E+05 | 1.98E+05 | 4.70E+04 | 4.28E+04 |
| 5.22E+05 | 9.57E+05 | 7.05E+05 | 1.59E+07 | 1.80E+07 | 1.57E+07 | 1.34E+07 | 1.65E+07 | 1.45E+07 |
| 1.66E+07 | 1.70E+07 | 1.61E+07 | 2.94E+07 | 2.68E+07 | 2.97E+07 | 2.55E+07 | 3.76E+07 | 3.23E+07 |
| 1.16E+06 | 1.73E+06 | 1.34E+06 | 9.79E+06 | 9.78E+06 | 1.03E+07 | 1.16E+07 | 1.20E+07 | 1.38E+07 |
| 3.93E+04 | 2.57E+04 | 1.68E+04 | 6.21E+04 | 6.29E+04 | 4.65E+04 | 6.18E+04 | 7.58E+04 | 6.49E+04 |
| 3.00E+04 | 4.73E+04 | 4.54E+04 | 2.50E+06 | 2.24E+06 | 1.89E+06 | 1.39E+06 | 2.13E+06 | 1.59E+06 |
| 5.68E+05 | 8.05E+05 | 6.21E+05 | 1.73E+06 | 2.05E+06 | 1.55E+06 | 1.64E+06 | 2.17E+06 | 1.80E+06 |
| 1.41E+04 | 1.93E+04 | 1.47E+04 | 1.64E+05 | 2.00E+05 | 1.97E+05 | 9.40E+04 | 2.38E+05 | 1.52E+05 |
| 1.62E+04 | 9.00E+00 | 1.28E+04 | 3.62E+04 | 2.82E+04 | 5.80E+04 | 2.02E+04 | 4.62E+04 | 2.85E+04 |
| 1.75E+04 | 1.15E+04 | 3.63E+03 | 1.29E+05 | 1.37E+05 | 2.79E+05 | 9.90E+04 | 1.26E+05 | 1.73E+05 |
| 3.30E+03 | 9.00E+00 | 9.00E+00 | 1.78E+05 | 1.52E+05 | 2.03E+05 | 5.35E+04 | 2.06E+05 | 1.14E+05 |
| 1.71E+04 | 2.28E+04 | 1.80E+04 | 1.72E+04 | 1.89E+04 | 1.27E+04 | 1.06E+04 | 1.45E+04 | 8.35E+03 |
| 4.84E+05 | 4.43E+05 | 3.84E+05 | 1.31E+05 | 1.87E+05 | 3.74E+05 | 1.95E+05 | 2.01E+05 | 1.96E+05 |
| 7.63E+04 | 8.11E+04 | 7.38E+04 | 1.10E+04 | 1.03E+04 | 9.49E+03 | 1.04E+04 | 7.98E+03 | 9.00E+00 |
| 3.94E+07 | 4.37E+07 | 3.81E+07 | 1.17E+05 | 1.17E+05 | 2.50E+05 | 1.44E+05 | 1.32E+05 | 1.15E+05 |
| 3.67E+05 | 4.00E+05 | 3.79E+05 | 3.59E+04 | 4.84E+04 | 7.05E+04 | 6.08E+04 | 5.96E+04 | 2.72E+04 |
| 1.75E+06 | 2.33E+06 | 1.36E+06 | 1.51E+05 | 1.18E+05 | 5.25E+05 | 1.23E+05 | 1.81E+05 | 9.28E+04 |
| 2.68E+05 | 3.17E+05 | 2.61E+05 | 3.87E+04 | 3.49E+04 | 8.61E+04 | 4.54E+04 | 5.08E+04 | 3.71E+04 |
| 2.07E+04 | 3.16E+04 | 3.07E+04 | 6.27E+04 | 5.65E+04 | 6.31E+04 | 8.48E+04 | 4.24E+04 | 4.19E+04 |
| 6.62E+05 | 9.81E+05 | 4.63E+05 | 8.46E+05 | 7.51E+05 | 1.39E+06 | 1.08E+06 | 9.61E+05 | 7.04E+05 |
| 5.71E+05 | 7.84E+05 | 4.38E+05 | 1.28E+05 | 1.04E+05 | 1.11E+05 | 8.15E+04 | 1.51E+05 | 1.12E+05 |
| 3.52E+05 | 4.04E+05 | 3.07E+05 | 9.08E+05 | 1.06E+06 | 9.67E+05 | 1.36E+06 | 8.94E+05 | 7.64E+05 |
| 1.51E+05 | 1.70E+05 | 1.07E+05 | 1.43E+05 | 1.15E+05 | 8.35E+04 | 1.56E+05 | 1.39E+05 | 7.96E+04 |
| 3.25E+05 | 4.69E+05 | 3.24E+05 | 1.26E+06 | 1.33E+06 | 2.58E+06 | 1.91E+06 | 1.38E+06 | 1.17E+06 |
| 2.31E+06 | 2.59E+06 | 1.83E+06 | 1.78E+06 | 1.70E+06 | 2.73E+06 | 2.34E+06 | 1.95E+06 | 2.13E+06 |
| 1.16E+05 | 1.19E+05 | 8.81E+04 | 5.25E+05 | 4.19E+05 | 7.67E+05 | 7.26E+05 | 5.14E+05 | 6.92E+05 |
| 3.06E+04 | 3.46E+04 | 2.27E+04 | 2.49E+05 | 2.77E+05 | 3.29E+05 | 3.38E+05 | 2.47E+05 | 2.28E+05 |
| 9.18E+04 | 1.42E+05 | 1.08E+05 | 8.92E+04 | 1.14E+05 | 1.07E+05 | 1.28E+05 | 1.02E+05 | 1.05E+05 |
| 1.28E+04 | 2.92E+04 | 1.89E+04 | 3.86E+04 | 7.01E+04 | 1.20E+05 | 4.70E+04 | 3.51E+04 | 4.73E+04 |
| 9.39E+03 | 4.98E+03 | 1.25E+04 | 2.71E+04 | 2.43E+04 | 4.44E+04 | 3.28E+04 | 3.27E+04 | 1.78E+04 |
| 2.84E+05 | 4.63E+05 | 2.97E+05 | 9.00E+00 | 9.00E+00 | 9.00E+00 | 1.60E+04 | 9.00E+00 | 9.00E+00 |
| 9.57E+03 | 9.03E+03 | 8.87E+03 | 1.28E+05 | 1.20E+05 | 1.36E+05 | 1.58E+05 | 1.58E+05 | 1.04E+05 |
| 9.00E+00 | 9.00E+00 | 9.00E+00 | 1.31E+05 | 9.96E+04 | 7.59E+04 | 1.27E+05 | 1.28E+05 | 7.91E+04 |
| 2.66E+04 | 3.67E+04 | 2.38E+04 | 3.28E+05 | 3.17E+05 | 3.04E+05 | 3.69E+05 | 4.72E+05 | 4.56E+05 |
| 7.84E+04 | 8.98E+04 | 6.71E+04 | 7.16E+03 | 3.92E+03 | 2.63E+04 | 7.47E+03 | 1.11E+04 | 7.51E+03 |
| 3.49E+04 | 2.57E+04 | 2.94E+04 | 1.31E+04 | 1.02E+04 | 1.82E+04 | 7.36E+03 | 2.16E+04 | 3.88E+03 |
| 2.86E+04 | 2.33E+04 | 2.00E+04 | 8.58E+02 | 8.11E+03 | 1.33E+04 | 6.98E+03 | 9.00E+00 | 3.22E+03 |
| 3.33E+04 | 3.82E+04 | 4.49E+04 | 2.89E+04 | 2.63E+04 | 1.15E+05 | 1.60E+04 | 3.55E+04 | 3.82E+04 |
| 1.05E+05 | 1.46E+05 | 1.13E+05 | 9.00E+00 | 9.00E+00 | 9.00E+00 | 7.13E+02 | 9.00E+00 | 9.00E+00 |
| 1.41E+05 | 1.70E+05 | 1.47E+05 | 1.44E+05 | 1.36E+05 | 4.37E+05 | 1.12E+05 | 1.58E+05 | 1.46E+05 |
| 1.18E+04 | 8.25E+03 | 2.58E+03 | 9.20E+03 | 1.59E+04 | 3.45E+04 | 1.72E+04 | 1.25E+04 | 1.47E+04 |
| 8.12E+03 | 4.46E+03 | 1.40E+04 | 5.71E+04 | 5.07E+04 | 2.62E+04 | 1.38E+04 | 3.68E+04 | 4.87E+04 |
| 4.97E+04 | 1.00E+05 | 6.86E+04 | 4.21E+04 | 4.02E+04 | 4.50E+04 | 3.70E+04 | 8.23E+04 | 1.06E+05 |
| 1.93E+03 | 9.00E+00 | 1.93E+03 | 2.11E+04 | 2.44E+04 | 3.12E+04 | 6.26E+03 | 4.74E+04 | 1.93E+04 |
| 1.07E+05 | 1.15E+05 | 8.45E+04 | 2.19E+04 | 2.39E+04 | 2.76E+04 | 2.04E+04 | 2.72E+04 | 1.53E+04 |
| 4.00E+04 | 2.78E+04 | 3.11E+04 | 7.81E+03 | 5.81E+03 | 2.94E+04 | 2.53E+03 | 6.91E+03 | 2.76E+03 |
| 7.98E+04 | 1.35E+05 | 6.87E+04 | 2.41E+04 | 3.40E+04 | 3.19E+04 | 4.12E+04 | 4.03E+04 | 1.92E+04 |
| 8.14E+03 | 8.49E+03 | 9.00E+00 | 8.51E+04 | 8.24E+04 | 1.02E+05 | 9.31E+04 | 9.87E+04 | 7.54E+04 |
| 7.49E+05 | 1.07E+06 | 1.10E+06 | 9.24E+05 | 1.03E+06 | 6.65E+05 | 8.52E+05 | 6.05E+05 | 6.49E+05 |
| 5.70E+03 | 9.00E+00 | 9.00E+00 | 2.31E+04 | 4.10E+04 | 2.25E+04 | 1.85E+04 | 5.07E+04 | 1.78E+04 |
| 9.00E+00 | 1.56E+03 | 9.00E+00 | 2.21E+04 | 1.86E+04 | 2.91E+04 | 1.75E+04 | 4.91E+04 | 1.85E+04 |
| 9.00E+00 | 9.00E+00 | 9.00E+00 | 1.90E+04 | 1.13E+04 | 7.22E+03 | 7.72E+03 | 3.55E+04 | 8.10E+03 |

|          |          |          |          |          |          |          |          |          |
|----------|----------|----------|----------|----------|----------|----------|----------|----------|
| 9.00E+00 | 5.10E+02 | 9.00E+00 | 3.43E+04 | 1.94E+04 | 3.78E+04 | 1.23E+04 | 3.63E+04 | 2.20E+04 |
| 2.61E+03 | 9.00E+00 | 2.59E+03 | 9.84E+03 | 1.13E+04 | 2.05E+04 | 8.72E+03 | 2.46E+04 | 7.55E+03 |
| 9.00E+00 | 9.00E+00 | 9.00E+00 | 2.66E+04 | 2.41E+04 | 3.98E+04 | 9.80E+03 | 4.76E+04 | 1.12E+04 |
| 9.00E+00 | 9.00E+00 | 9.00E+00 | 6.18E+03 | 1.22E+04 | 1.12E+04 | 5.67E+03 | 2.90E+04 | 2.61E+04 |
| 9.00E+00 | 9.00E+00 | 9.00E+00 | 1.18E+04 | 1.07E+04 | 3.17E+04 | 8.16E+03 | 4.62E+04 | 1.13E+04 |
| 9.00E+00 | 9.00E+00 | 9.00E+00 | 7.66E+03 | 1.43E+04 | 1.32E+04 | 4.60E+03 | 1.69E+04 | 1.11E+04 |
| 1.03E+03 | 9.00E+00 | 9.00E+00 | 2.86E+04 | 4.79E+04 | 2.82E+04 | 1.18E+04 | 8.39E+04 | 2.61E+04 |
| 9.00E+00 | 9.00E+00 | 9.00E+00 | 1.49E+04 | 9.72E+03 | 1.77E+04 | 3.01E+03 | 3.84E+04 | 1.73E+04 |
| 9.00E+00 | 9.00E+00 | 9.00E+00 | 1.74E+04 | 2.53E+04 | 2.96E+04 | 9.80E+03 | 2.97E+04 | 2.05E+04 |
| 9.00E+00 | 9.00E+00 | 9.00E+00 | 1.49E+04 | 2.77E+04 | 2.15E+04 | 1.18E+04 | 7.90E+04 | 1.62E+04 |
| 1.61E+05 | 1.05E+05 | 1.09E+05 | 9.38E+04 | 6.08E+04 | 1.14E+05 | 6.88E+04 | 8.10E+04 | 7.79E+04 |
| 3.67E+03 | 2.39E+03 | 8.16E+02 | 5.22E+04 | 4.33E+04 | 5.10E+04 | 3.21E+04 | 4.25E+04 | 1.48E+04 |
| 2.87E+06 | 3.40E+06 | 3.49E+06 | 3.76E+06 | 3.10E+06 | 3.72E+06 | 2.75E+06 | 6.13E+06 | 4.18E+06 |
| 1.12E+05 | 7.02E+04 | 9.11E+04 | 5.67E+04 | 6.64E+04 | 3.94E+04 | 5.69E+04 | 9.40E+04 | 5.27E+04 |
| 3.87E+04 | 2.93E+04 | 2.28E+04 | 2.54E+04 | 1.59E+04 | 2.46E+04 | 3.30E+04 | 2.56E+04 | 2.66E+04 |
| 3.22E+04 | 4.90E+04 | 3.29E+04 | 9.00E+00 | 9.00E+00 | 9.00E+00 | 9.00E+00 | 9.00E+00 | 9.00E+00 |
| 9.00E+00 | 9.00E+00 | 1.54E+03 | 3.03E+04 | 2.99E+04 | 4.50E+04 | 4.13E+04 | 5.15E+04 | 3.23E+04 |
| 4.46E+04 | 4.34E+04 | 5.31E+04 | 1.03E+04 | 5.70E+03 | 1.89E+04 | 4.81E+03 | 1.08E+04 | 1.09E+04 |
| 8.39E+04 | 1.21E+05 | 7.44E+04 | 3.71E+03 | 7.58E+03 | 1.04E+04 | 2.13E+03 | 8.83E+03 | 7.25E+03 |
| 1.10E+05 | 9.83E+04 | 8.65E+04 | 1.52E+04 | 9.10E+03 | 2.58E+04 | 1.33E+04 | 9.18E+03 | 1.71E+04 |
| 3.62E+03 | 6.83E+03 | 1.23E+03 | 3.40E+04 | 5.52E+04 | 3.39E+04 | 4.36E+04 | 5.83E+04 | 7.12E+04 |
| 3.83E+04 | 3.06E+04 | 1.51E+04 | 7.82E+04 | 7.26E+04 | 7.13E+04 | 3.76E+04 | 5.60E+04 | 1.19E+05 |
| 1.16E+06 | 1.06E+06 | 7.23E+05 | 1.47E+04 | 1.45E+04 | 2.98E+04 | 5.37E+03 | 9.82E+03 | 1.81E+04 |
| 1.93E+05 | 2.09E+05 | 1.15E+05 | 9.77E+02 | 9.00E+00 | 9.00E+00 | 9.00E+00 | 9.00E+00 | 9.00E+00 |
| 1.02E+05 | 1.11E+05 | 1.15E+05 | 9.00E+00 | 9.00E+00 | 9.00E+00 | 9.00E+00 | 9.00E+00 | 9.00E+00 |
| 1.08E+06 | 1.13E+06 | 4.87E+05 | 1.18E+05 | 7.25E+04 | 5.98E+04 | 8.09E+04 | 8.69E+04 | 7.13E+04 |
| 9.00E+00 | 9.00E+00 | 9.00E+00 | 2.49E+04 | 3.02E+04 | 3.12E+04 | 3.63E+04 | 3.73E+04 | 3.47E+04 |
| 9.00E+00 | 9.00E+00 | 9.00E+00 | 1.64E+05 | 1.34E+05 | 1.48E+05 | 1.19E+05 | 3.29E+05 | 2.76E+05 |
| 1.08E+07 | 1.03E+07 | 7.84E+06 | 5.21E+04 | 7.91E+04 | 9.00E+00 | 1.50E+05 | 2.48E+05 | 9.00E+00 |
| 2.67E+07 | 3.15E+07 | 2.01E+07 | 9.00E+00 | 9.00E+00 | 9.00E+00 | 9.00E+00 | 9.00E+00 | 9.00E+00 |
| 2.96E+04 | 3.24E+04 | 1.63E+04 | 9.00E+00 | 9.00E+00 | 9.00E+00 | 9.00E+00 | 9.00E+00 | 9.00E+00 |
| 6.60E+03 | 1.55E+03 | 3.87E+03 | 6.72E+04 | 5.03E+04 | 8.52E+04 | 3.11E+04 | 6.75E+04 | 5.44E+04 |
| 3.08E+04 | 3.74E+04 | 2.35E+04 | 3.97E+04 | 3.25E+04 | 3.36E+04 | 3.37E+04 | 4.66E+04 | 4.40E+04 |
| 9.00E+00 | 9.00E+00 | 9.00E+00 | 2.73E+04 | 2.49E+04 | 3.57E+04 | 6.09E+03 | 3.49E+04 | 2.32E+04 |
| 9.00E+00 | 9.80E+03 | 9.00E+00 |
| 3.66E+04 | 3.02E+04 | 3.14E+04 | 4.55E+04 | 3.44E+04 | 6.04E+04 | 4.95E+04 | 2.90E+04 | 3.05E+04 |
| 4.64E+04 | 7.06E+04 | 4.55E+04 | 9.00E+00 | 9.00E+00 | 1.64E+04 | 9.00E+00 | 9.00E+00 | 9.00E+00 |
| 9.47E+05 | 1.33E+06 | 6.61E+05 | 8.93E+04 | 1.55E+05 | 8.49E+04 | 1.02E+05 | 1.53E+05 | 1.75E+05 |
| 5.22E+04 | 7.73E+04 | 3.53E+04 | 9.00E+00 | 9.00E+00 | 9.00E+00 | 9.00E+00 | 9.00E+00 | 9.00E+00 |
| 1.36E+05 | 1.97E+05 | 1.56E+05 | 1.69E+05 | 1.34E+05 | 1.47E+05 | 3.19E+04 | 1.22E+05 | 8.35E+04 |
| 8.24E+04 | 8.87E+04 | 8.61E+04 | 1.45E+05 | 1.25E+05 | 2.42E+05 | 1.44E+05 | 1.11E+05 | 1.45E+05 |
| 2.91E+04 | 3.56E+04 | 2.86E+04 | 7.31E+04 | 5.53E+04 | 2.56E+05 | 3.42E+04 | 5.90E+04 | 1.35E+05 |
| 9.00E+00 | 5.90E+03 | 3.92E+03 | 6.15E+04 | 5.33E+04 | 6.86E+04 | 7.49E+04 | 4.73E+04 | 4.37E+04 |
| 3.47E+04 | 2.77E+04 | 2.12E+04 | 2.29E+04 | 1.78E+04 | 3.34E+04 | 1.02E+04 | 1.49E+04 | 2.22E+04 |
| 9.00E+00 | 9.00E+00 | 9.00E+00 | 7.09E+04 | 5.92E+04 | 1.20E+05 | 1.08E+04 | 1.67E+05 | 7.13E+04 |
| 9.00E+00 | 9.00E+00 | 9.00E+00 | 9.84E+03 | 4.92E+03 | 3.43E+03 | 1.50E+03 | 2.28E+04 | 1.68E+04 |
| 9.00E+00 | 9.42E+02 | 9.00E+00 | 1.56E+04 | 1.70E+04 | 6.63E+03 | 6.54E+03 | 3.69E+04 | 7.03E+03 |
| 2.97E+06 | 3.32E+06 | 3.23E+06 | 1.26E+06 | 1.39E+06 | 1.42E+06 | 1.42E+06 | 1.17E+06 | 1.28E+06 |
| 6.88E+04 | 5.43E+04 | 6.65E+04 | 4.06E+04 | 3.29E+04 | 5.28E+04 | 4.83E+04 | 4.52E+04 | 3.98E+04 |
| 2.50E+04 | 1.43E+04 | 2.88E+04 | 1.07E+04 | 2.03E+04 | 2.32E+04 | 2.15E+04 | 2.40E+04 | 1.93E+04 |
| 5.89E+03 | 9.00E+00 | 9.00E+00 | 7.87E+03 | 1.17E+04 | 2.21E+04 | 3.93E+03 | 2.21E+04 | 1.71E+04 |
| 8.71E+02 | 5.67E+03 | 8.71E+02 | 1.69E+04 | 5.58E+03 | 1.39E+04 | 9.43E+03 | 1.40E+04 | 1.37E+04 |
| 3.95E+03 | 9.00E+00 | 2.47E+03 | 6.11E+04 | 4.84E+04 | 5.65E+04 | 3.64E+04 | 1.41E+05 | 4.39E+04 |
| 2.56E+03 | 8.70E+02 | 8.71E+02 | 2.83E+04 | 2.03E+04 | 1.65E+04 | 1.12E+04 | 4.44E+04 | 3.68E+04 |

|          |          |          |          |          |          |          |          |          |
|----------|----------|----------|----------|----------|----------|----------|----------|----------|
| 9.00E+00 | 9.00E+00 | 9.00E+00 | 4.60E+04 | 4.07E+04 | 5.75E+04 | 1.34E+04 | 1.20E+05 | 4.93E+04 |
| 5.19E+04 | 9.00E+00 | 9.00E+00 | 1.12E+05 | 1.14E+05 | 8.51E+04 | 6.32E+04 | 1.56E+05 | 1.06E+05 |
| 1.76E+05 | 1.55E+05 | 1.63E+05 | 1.73E+05 | 1.28E+05 | 2.11E+05 | 9.86E+04 | 2.07E+05 | 1.86E+05 |
| 2.58E+03 | 9.00E+00 | 9.00E+00 | 2.15E+04 | 6.68E+03 | 1.87E+04 | 1.47E+04 | 3.44E+04 | 2.32E+04 |
| 5.40E+04 | 9.26E+04 | 9.46E+04 | 6.60E+04 | 8.61E+04 | 9.05E+04 | 1.09E+05 | 1.06E+05 | 5.98E+04 |
| 2.04E+04 | 3.62E+04 | 2.81E+04 | 2.61E+04 | 1.42E+04 | 3.27E+04 | 2.38E+04 | 2.01E+04 | 2.94E+04 |
| 9.00E+00 | 9.00E+00 | 9.00E+00 | 1.33E+04 | 2.46E+04 | 1.59E+04 | 1.14E+04 | 4.35E+04 | 1.22E+04 |
| 3.18E+03 | 9.00E+00 | 9.00E+00 | 4.73E+03 | 2.00E+03 | 1.57E+03 | 9.00E+00 | 7.01E+03 | 2.06E+03 |
| 8.07E+03 | 6.33E+03 | 9.00E+00 | 6.73E+04 | 4.71E+04 | 7.36E+04 | 6.74E+04 | 5.70E+04 | 5.81E+04 |
| 9.00E+00 | 9.00E+00 | 9.00E+00 | 3.03E+04 | 2.85E+04 | 3.69E+04 | 2.67E+04 | 2.44E+04 | 2.79E+04 |
| 6.43E+04 | 6.31E+04 | 7.25E+04 | 2.14E+05 | 2.12E+05 | 2.17E+05 | 1.43E+05 | 2.10E+05 | 1.74E+05 |
| 7.88E+06 | 7.10E+06 | 7.70E+06 | 1.66E+06 | 1.63E+06 | 1.49E+06 | 1.68E+06 | 1.50E+06 | 1.65E+06 |
| 1.70E+06 | 1.69E+06 | 1.72E+06 | 5.25E+05 | 4.13E+05 | 7.01E+05 | 6.16E+05 | 3.98E+05 | 4.07E+05 |
| 1.17E+05 | 7.36E+04 | 8.62E+04 | 5.24E+06 | 4.51E+06 | 4.09E+06 | 3.05E+06 | 3.65E+06 | 3.82E+06 |
| 7.20E+06 | 5.60E+06 | 6.72E+06 | 2.45E+07 | 2.12E+07 | 2.09E+07 | 2.42E+07 | 1.70E+07 | 1.77E+07 |
| 7.84E+04 | 7.05E+04 | 6.20E+04 | 5.56E+04 | 6.09E+04 | 2.07E+05 | 5.27E+04 | 5.36E+04 | 5.07E+04 |
| 5.97E+04 | 6.11E+04 | 4.99E+04 | 7.25E+04 | 6.68E+04 | 7.49E+05 | 4.30E+04 | 7.79E+04 | 4.91E+04 |
| 2.91E+05 | 2.56E+05 | 3.14E+05 | 2.24E+05 | 2.04E+05 | 2.33E+05 | 2.51E+05 | 2.54E+05 | 2.49E+05 |
| 3.77E+04 | 3.39E+04 | 2.63E+04 | 1.89E+04 | 2.62E+04 | 9.31E+04 | 1.67E+04 | 2.62E+04 | 2.16E+04 |
| 3.67E+04 | 3.40E+04 | 3.06E+04 | 1.48E+05 | 1.03E+05 | 1.87E+06 | 4.77E+04 | 1.50E+05 | 1.17E+05 |
| 9.00E+00 | 9.00E+00 | 9.00E+00 | 2.22E+05 | 2.21E+05 | 1.45E+06 | 1.04E+05 | 2.46E+05 | 1.75E+05 |
| 5.40E+04 | 5.20E+04 | 5.26E+04 | 4.46E+04 | 4.65E+04 | 6.15E+04 | 4.84E+04 | 3.67E+04 | 3.67E+04 |
| 2.45E+04 | 1.11E+04 | 2.18E+04 | 4.41E+04 | 3.38E+04 | 3.05E+04 | 1.38E+04 | 2.59E+04 | 3.03E+04 |
| 9.00E+00 | 9.00E+00 | 9.00E+00 | 6.36E+04 | 4.00E+04 | 2.25E+05 | 1.99E+04 | 7.11E+04 | 4.45E+04 |
| 1.57E+04 | 2.12E+04 | 1.31E+04 | 3.88E+04 | 2.58E+04 | 9.45E+04 | 1.17E+04 | 3.41E+04 | 3.93E+04 |
| 9.00E+00 | 9.00E+00 | 5.12E+03 | 1.78E+05 | 1.57E+05 | 2.48E+05 | 9.94E+04 | 1.88E+05 | 1.75E+05 |
| 4.13E+06 | 3.91E+06 | 2.19E+06 | 2.87E+06 | 2.80E+06 | 9.41E+06 | 2.67E+06 | 5.08E+06 | 2.83E+06 |
| 1.98E+05 | 1.51E+05 | 1.88E+05 | 3.28E+05 | 3.46E+05 | 4.83E+06 | 4.13E+04 | 4.04E+05 | 1.85E+05 |
| 1.53E+04 | 1.13E+04 | 1.24E+04 | 2.72E+04 | 2.36E+04 | 1.15E+05 | 3.19E+03 | 2.20E+04 | 1.95E+04 |
| 5.01E+06 | 4.52E+06 | 4.26E+06 | 4.74E+06 | 5.16E+06 | 6.08E+06 | 4.08E+06 | 4.46E+06 | 3.73E+06 |
| 5.26E+06 | 4.84E+06 | 3.45E+06 | 4.92E+06 | 3.42E+06 | 3.07E+07 | 1.24E+06 | 5.46E+06 | 3.25E+06 |
| 2.90E+05 | 2.13E+05 | 2.22E+05 | 1.53E+07 | 1.35E+07 | 3.71E+07 | 7.82E+06 | 1.99E+07 | 1.30E+07 |
| 2.09E+03 | 5.65E+03 | 1.39E+03 | 2.91E+05 | 1.95E+05 | 1.09E+06 | 1.26E+05 | 2.79E+05 | 2.22E+05 |
| 9.00E+00 | 9.00E+00 | 9.00E+00 | 1.53E+04 | 1.31E+04 | 7.27E+04 | 7.49E+03 | 2.12E+04 | 1.21E+04 |
| 5.57E+04 | 5.24E+04 | 4.35E+04 | 4.26E+04 | 4.27E+04 | 6.64E+04 | 1.79E+04 | 3.51E+04 | 3.88E+04 |
| 5.09E+05 | 5.17E+05 | 5.06E+05 | 3.45E+04 | 3.55E+04 | 1.72E+05 | 2.12E+04 | 6.20E+04 | 3.94E+04 |
| 8.60E+04 | 7.55E+04 | 3.16E+04 | 1.62E+05 | 1.29E+05 | 1.71E+05 | 1.22E+05 | 1.32E+05 | 1.32E+05 |
| 2.19E+05 | 2.23E+05 | 1.87E+05 | 4.03E+05 | 4.18E+05 | 2.74E+05 | 1.04E+05 | 3.47E+05 | 2.09E+05 |
| 4.66E+06 | 4.32E+06 | 4.08E+06 | 5.78E+06 | 5.36E+06 | 4.26E+06 | 3.20E+06 | 5.58E+06 | 4.10E+06 |
| 2.59E+04 | 2.18E+04 | 2.70E+04 | 3.81E+05 | 2.67E+05 | 3.58E+05 | 6.60E+04 | 2.29E+05 | 1.45E+05 |
| 4.27E+04 | 4.36E+04 | 3.63E+04 | 2.07E+05 | 1.34E+05 | 2.99E+05 | 1.19E+05 | 1.73E+05 | 1.25E+05 |
| 3.98E+06 | 3.75E+06 | 4.05E+06 | 1.12E+07 | 7.79E+06 | 6.41E+06 | 6.38E+06 | 7.63E+06 | 6.94E+06 |
| 2.12E+04 | 1.72E+04 | 1.30E+04 | 9.00E+00 | 9.00E+00 | 9.00E+00 | 9.00E+00 | 9.00E+00 | 9.00E+00 |
| 9.00E+00 | 9.00E+00 | 9.00E+00 | 7.00E+04 | 7.12E+04 | 2.05E+06 | 5.12E+03 | 8.55E+04 | 3.63E+04 |
| 1.40E+05 | 1.24E+05 | 1.01E+05 | 3.67E+04 | 4.20E+04 | 6.89E+05 | 8.79E+03 | 6.06E+04 | 2.83E+04 |
| 1.36E+05 | 8.64E+04 | 1.23E+05 | 1.12E+06 | 8.76E+05 | 1.26E+07 | 9.25E+04 | 1.38E+06 | 7.35E+05 |
| 9.00E+00 | 9.00E+00 | 9.00E+00 | 6.64E+05 | 7.20E+05 | 4.60E+06 | 7.54E+04 | 1.14E+06 | 7.21E+05 |
| 4.89E+03 | 9.00E+00 | 9.00E+00 | 1.04E+05 | 9.38E+04 | 5.99E+05 | 2.25E+04 | 1.14E+05 | 6.40E+04 |
| 9.00E+00 | 9.00E+00 | 9.00E+00 | 8.10E+04 | 6.05E+04 | 3.15E+05 | 2.63E+04 | 1.36E+05 | 6.66E+04 |
| 9.00E+00 | 4.79E+03 | 9.00E+00 | 4.47E+04 | 5.29E+04 | 1.11E+05 | 2.02E+04 | 1.95E+04 | 4.46E+04 |
| 3.44E+04 | 1.31E+04 | 3.61E+04 | 3.06E+05 | 2.68E+05 | 5.48E+05 | 6.75E+04 | 2.17E+05 | 2.26E+05 |
| 3.03E+05 | 2.74E+05 | 3.19E+05 | 1.07E+06 | 6.84E+05 | 5.83E+05 | 6.38E+05 | 7.23E+05 | 6.78E+05 |
| 9.39E+04 | 8.82E+04 | 8.62E+04 | 8.30E+05 | 6.37E+05 | 1.69E+06 | 9.53E+04 | 6.33E+05 | 3.97E+05 |
| 4.08E+03 | 8.61E+03 | 2.83E+03 | 8.51E+04 | 3.34E+04 | 1.50E+05 | 5.44E+04 | 1.23E+05 | 5.55E+04 |

|          |          |          |          |          |          |          |          |          |
|----------|----------|----------|----------|----------|----------|----------|----------|----------|
| 8.93E+04 | 9.00E+00 | 9.00E+00 | 8.65E+04 | 9.00E+00 | 1.95E+05 | 9.00E+00 | 9.00E+00 | 9.00E+00 |
| 9.00E+00 | 9.00E+00 | 9.00E+00 | 1.70E+05 | 1.62E+05 | 2.04E+05 | 1.90E+05 | 1.34E+05 | 1.34E+05 |
| 9.00E+00 | 9.00E+00 | 9.00E+00 | 1.87E+05 | 1.26E+05 | 3.87E+05 | 6.92E+04 | 2.27E+05 | 1.53E+05 |
| 8.80E+03 | 8.33E+03 | 9.00E+00 | 4.09E+04 | 2.71E+04 | 4.19E+04 | 2.42E+04 | 2.73E+04 | 4.54E+04 |
| 2.99E+06 | 3.45E+06 | 3.66E+06 | 3.29E+06 | 4.31E+06 | 4.59E+06 | 3.83E+06 | 4.21E+06 | 4.01E+06 |
| 5.73E+06 | 4.69E+06 | 3.78E+06 | 8.47E+05 | 8.99E+05 | 4.41E+06 | 5.95E+05 | 1.51E+06 | 5.74E+05 |
| 4.06E+05 | 3.41E+05 | 3.18E+05 | 3.83E+06 | 3.14E+06 | 5.07E+06 | 2.37E+06 | 5.56E+06 | 2.56E+06 |
| 8.69E+05 | 7.57E+05 | 6.89E+05 | 2.00E+04 | 2.02E+04 | 3.59E+04 | 1.57E+04 | 3.04E+04 | 1.52E+04 |
| 1.32E+05 | 1.41E+05 | 1.06E+05 | 7.66E+04 | 7.01E+04 | 7.05E+04 | 3.87E+04 | 1.02E+05 | 5.97E+04 |
| 4.09E+05 | 4.22E+05 | 2.99E+05 | 3.45E+05 | 3.50E+05 | 2.01E+05 | 9.41E+04 | 3.88E+05 | 1.88E+05 |
| 1.63E+07 | 1.58E+07 | 1.39E+07 | 7.08E+06 | 5.58E+06 | 4.65E+06 | 3.55E+06 | 6.85E+06 | 5.08E+06 |
| 4.06E+04 | 4.24E+04 | 2.83E+04 | 2.31E+05 | 1.75E+05 | 1.46E+05 | 4.62E+04 | 2.02E+05 | 9.88E+04 |
| 9.51E+05 | 9.27E+05 | 8.15E+05 | 6.42E+04 | 2.48E+04 | 5.82E+04 | 3.33E+04 | 5.18E+04 | 3.70E+04 |
| 6.25E+04 | 5.27E+04 | 4.25E+04 | 7.78E+04 | 1.66E+04 | 6.81E+04 | 1.68E+04 | 8.55E+04 | 4.68E+04 |
| 3.65E+06 | 4.10E+06 | 3.79E+06 | 2.62E+06 | 2.12E+06 | 1.39E+06 | 1.46E+06 | 2.60E+06 | 1.55E+06 |
| 2.78E+06 | 2.15E+06 | 2.07E+06 | 8.17E+06 | 6.25E+06 | 6.96E+07 | 1.54E+06 | 1.22E+07 | 6.00E+06 |
| 1.29E+05 | 9.21E+04 | 1.07E+05 | 1.39E+07 | 1.03E+07 | 4.94E+07 | 5.01E+06 | 1.99E+07 | 1.10E+07 |
| 1.45E+05 | 1.48E+05 | 9.06E+04 | 1.20E+04 | 9.25E+03 | 1.08E+05 | 2.59E+04 | 2.49E+04 | 1.20E+04 |
| 6.63E+05 | 4.78E+05 | 4.07E+05 | 3.39E+05 | 1.88E+05 | 1.47E+06 | 7.85E+04 | 3.50E+05 | 2.14E+05 |
| 4.09E+04 | 2.06E+04 | 2.64E+04 | 2.07E+05 | 1.32E+05 | 4.37E+05 | 5.85E+04 | 2.06E+05 | 1.30E+05 |
| 5.61E+04 | 4.52E+04 | 4.80E+04 | 2.29E+05 | 2.13E+05 | 3.32E+05 | 6.06E+04 | 2.57E+05 | 1.36E+05 |
| 2.85E+06 | 2.63E+06 | 3.07E+06 | 4.26E+06 | 2.88E+06 | 9.23E+06 | 1.87E+06 | 3.89E+06 | 3.29E+06 |
| 3.10E+04 | 1.24E+04 | 1.48E+04 | 4.63E+05 | 2.44E+05 | 1.61E+06 | 8.90E+04 | 3.20E+05 | 2.36E+05 |
| 2.05E+05 | 1.32E+05 | 1.56E+05 | 1.83E+04 | 8.05E+03 | 7.35E+04 | 1.25E+04 | 1.51E+04 | 6.26E+03 |
| 9.91E+04 | 8.76E+04 | 9.70E+04 | 1.50E+05 | 7.13E+04 | 2.53E+05 | 4.68E+04 | 1.10E+05 | 9.74E+04 |
| 1.14E+06 | 1.02E+06 | 1.05E+06 | 1.20E+07 | 7.82E+06 | 2.09E+07 | 2.51E+06 | 8.37E+06 | 6.28E+06 |
| 1.60E+05 | 1.35E+05 | 1.27E+05 | 1.61E+04 | 9.09E+03 | 2.79E+04 | 7.88E+03 | 1.32E+04 | 2.93E+03 |
| 1.21E+05 | 1.11E+05 | 1.55E+05 | 2.01E+04 | 2.35E+03 | 5.85E+04 | 1.55E+04 | 1.69E+04 | 8.17E+03 |
| 7.82E+04 | 4.46E+04 | 4.64E+04 | 6.37E+06 | 5.08E+06 | 1.41E+07 | 4.50E+06 | 1.03E+07 | 5.51E+06 |
| 3.66E+03 | 4.07E+03 | 5.58E+03 | 1.10E+06 | 7.82E+05 | 2.19E+06 | 6.37E+05 | 1.56E+06 | 8.04E+05 |
| 9.00E+00 | 9.00E+00 | 9.00E+00 | 2.70E+04 | 1.25E+04 | 3.19E+04 | 9.81E+03 | 2.66E+04 | 1.13E+04 |
| 8.97E+03 | 3.73E+03 | 9.00E+00 | 3.07E+05 | 1.73E+05 | 7.77E+05 | 1.08E+05 | 3.49E+05 | 1.75E+05 |
| 9.00E+00 | 9.00E+00 | 9.00E+00 | 2.10E+05 | 1.76E+05 | 3.58E+05 | 1.40E+05 | 2.81E+05 | 2.05E+05 |
| 9.00E+00 | 9.03E+03 | 9.00E+00 | 3.96E+05 | 3.44E+05 | 4.51E+05 | 1.69E+05 | 6.00E+05 | 3.32E+05 |
| 1.64E+04 | 1.45E+04 | 1.88E+04 | 2.79E+06 | 2.42E+06 | 5.31E+06 | 2.43E+06 | 3.01E+06 | 2.46E+06 |
| 9.00E+00 | 9.00E+00 | 9.00E+00 | 1.19E+05 | 6.84E+04 | 4.86E+05 | 2.58E+04 | 1.02E+05 | 6.32E+04 |
| 9.00E+00 | 9.00E+00 | 4.44E+03 | 1.44E+05 | 9.89E+04 | 2.45E+05 | 6.84E+04 | 1.19E+05 | 1.03E+05 |
| 9.00E+00 | 9.00E+00 | 9.00E+00 | 1.83E+05 | 1.13E+05 | 2.60E+05 | 6.98E+04 | 1.36E+05 | 7.84E+04 |
| 7.23E+04 | 6.62E+04 | 7.07E+04 | 1.35E+07 | 9.81E+06 | 1.94E+07 | 3.05E+06 | 1.04E+07 | 6.53E+06 |
| 9.00E+00 | 1.22E+03 | 9.00E+00 | 9.29E+04 | 7.47E+04 | 1.79E+05 | 2.53E+04 | 7.53E+04 | 7.53E+04 |
| 9.00E+00 | 9.00E+00 | 9.43E+02 | 1.48E+04 | 2.53E+04 | 8.34E+04 | 1.27E+04 | 4.11E+04 | 9.27E+03 |
| 9.00E+00 | 9.00E+00 | 9.00E+00 | 1.71E+04 | 1.68E+04 | 3.10E+04 | 6.20E+03 | 2.27E+04 | 9.94E+03 |
| 5.06E+04 | 2.06E+04 | 3.92E+04 | 2.97E+04 | 3.27E+04 | 1.74E+05 | 2.83E+04 | 4.76E+04 | 2.93E+04 |
| 2.44E+04 | 4.02E+04 | 2.40E+04 | 3.69E+03 | 1.04E+04 | 2.28E+04 | 6.76E+03 | 1.16E+04 | 1.89E+04 |
| 9.00E+00 | 9.00E+00 | 9.00E+00 | 1.43E+04 | 5.30E+04 | 1.65E+05 | 2.84E+04 | 8.32E+04 | 4.68E+04 |
| 4.14E+04 | 4.66E+04 | 2.70E+04 | 4.08E+04 | 4.19E+04 | 3.17E+04 | 2.84E+04 | 4.28E+04 | 2.84E+04 |
| 2.12E+04 | 9.00E+00 | 1.53E+04 | 4.10E+04 | 3.41E+04 | 1.22E+05 | 3.74E+04 | 3.48E+04 | 3.88E+04 |
| 3.73E+05 | 2.55E+05 | 2.73E+05 | 7.27E+05 | 6.36E+05 | 1.65E+06 | 6.72E+05 | 5.56E+05 | 7.73E+05 |
| 9.00E+00 | 9.00E+00 | 8.20E+04 | 1.15E+05 | 5.94E+04 | 6.12E+06 | 9.34E+04 | 7.98E+04 | 1.86E+04 |
| 3.08E+04 | 3.04E+04 | 3.20E+04 | 9.00E+00 | 9.00E+00 | 1.86E+04 | 9.00E+00 | 2.72E+03 | 9.00E+00 |
| 1.85E+05 | 1.65E+05 | 1.95E+05 | 9.88E+03 | 5.38E+03 | 3.34E+04 | 9.26E+03 | 1.14E+04 | 4.26E+03 |
| 6.14E+04 | 5.24E+04 | 5.37E+04 | 9.00E+00 | 9.00E+00 | 9.00E+00 | 9.00E+00 | 9.00E+00 | 2.03E+03 |
| 1.57E+05 | 1.36E+05 | 1.30E+05 | 1.11E+04 | 8.54E+03 | 1.27E+04 | 1.18E+04 | 2.47E+03 | 3.91E+03 |
| 3.96E+04 | 2.96E+04 | 3.01E+04 | 2.96E+04 | 3.87E+04 | 4.13E+04 | 1.83E+04 | 2.73E+04 | 2.77E+04 |

|          |          |          |          |          |          |          |          |          |
|----------|----------|----------|----------|----------|----------|----------|----------|----------|
| 9.00E+00 | 9.00E+00 | 9.00E+00 | 6.42E+03 | 1.17E+04 | 2.40E+03 | 9.00E+00 | 5.55E+03 | 9.00E+00 |
| 5.84E+04 | 4.91E+04 | 5.37E+04 | 3.99E+03 | 1.11E+04 | 1.69E+04 | 4.42E+03 | 1.21E+04 | 5.61E+03 |
| 5.19E+04 | 7.40E+04 | 4.39E+04 | 7.16E+04 | 6.94E+04 | 7.72E+04 | 2.50E+04 | 5.76E+04 | 7.73E+04 |
| 3.94E+04 | 5.65E+04 | 3.65E+04 | 9.75E+03 | 1.35E+04 | 1.70E+04 | 2.74E+03 | 3.64E+03 | 5.09E+03 |
| 1.83E+04 | 2.41E+04 | 2.32E+04 | 2.43E+04 | 2.54E+04 | 3.47E+04 | 2.92E+04 | 2.41E+04 | 9.00E+00 |
| 6.70E+04 | 4.70E+04 | 2.54E+04 | 9.00E+00 | 9.00E+00 | 9.00E+00 | 1.36E+03 | 9.00E+00 | 9.00E+00 |
| 4.55E+06 | 5.03E+06 | 4.35E+06 | 4.47E+06 | 4.10E+06 | 6.14E+06 | 4.53E+06 | 4.64E+06 | 4.09E+06 |
| 4.13E+04 | 8.28E+04 | 5.71E+04 | 3.97E+04 | 6.87E+04 | 8.39E+04 | 5.24E+04 | 7.49E+04 | 4.10E+04 |
| 5.79E+05 | 8.03E+05 | 7.14E+05 | 2.70E+06 | 2.16E+06 | 2.15E+06 | 2.57E+06 | 1.93E+06 | 1.95E+06 |
| 1.90E+06 | 1.55E+06 | 2.41E+06 | 2.91E+06 | 2.53E+06 | 2.75E+06 | 2.30E+06 | 2.74E+06 | 3.03E+06 |
| 9.00E+00 | 9.00E+00 | 9.00E+00 | 6.42E+05 | 6.45E+05 | 2.60E+06 | 5.14E+05 | 6.01E+05 | 6.22E+05 |
| 9.00E+00 | 9.00E+00 | 9.00E+00 | 7.15E+05 | 6.64E+05 | 9.55E+05 | 8.27E+05 | 6.37E+05 | 6.84E+05 |
| 3.13E+06 | 3.13E+06 | 2.59E+06 | 6.78E+06 | 6.23E+06 | 1.82E+07 | 4.75E+06 | 7.15E+06 | 6.10E+06 |
| 3.01E+05 | 2.91E+05 | 2.96E+05 | 7.44E+05 | 8.16E+05 | 4.54E+06 | 2.54E+05 | 9.40E+05 | 6.30E+05 |
| 4.32E+05 | 4.74E+05 | 4.25E+05 | 8.63E+05 | 8.40E+05 | 1.54E+06 | 7.16E+05 | 7.95E+05 | 7.97E+05 |
| 3.70E+05 | 3.92E+05 | 4.68E+05 | 7.49E+05 | 7.08E+05 | 1.88E+06 | 4.12E+05 | 8.69E+05 | 5.97E+05 |
| 6.96E+06 | 9.72E+06 | 8.42E+06 | 7.19E+06 | 7.58E+06 | 1.31E+07 | 6.27E+06 | 9.71E+06 | 7.99E+06 |
| 1.60E+07 | 1.34E+07 | 1.44E+07 | 1.87E+07 | 1.73E+07 | 8.47E+07 | 9.94E+06 | 2.65E+07 | 1.59E+07 |
| 9.51E+05 | 8.54E+05 | 9.11E+05 | 2.15E+07 | 2.25E+07 | 4.27E+07 | 1.38E+07 | 2.88E+07 | 1.83E+07 |
| 9.00E+00 | 9.00E+00 | 9.00E+00 | 5.63E+05 | 5.16E+05 | 1.57E+06 | 3.92E+05 | 7.29E+05 | 4.97E+05 |
| 1.40E+06 | 1.51E+06 | 1.81E+06 | 1.63E+06 | 1.47E+06 | 1.91E+06 | 1.38E+06 | 2.29E+06 | 1.54E+06 |
| 9.00E+00 | 9.00E+00 | 9.00E+00 | 5.16E+05 | 4.62E+05 | 1.08E+06 | 3.60E+05 | 4.58E+05 | 4.41E+05 |
| 1.91E+06 | 1.87E+06 | 1.67E+06 | 6.29E+06 | 2.45E+06 | 2.94E+06 | 4.50E+06 | 2.26E+06 | 2.33E+06 |
| 1.45E+06 | 1.22E+06 | 1.78E+06 | 9.51E+05 | 7.60E+05 | 2.56E+06 | 7.36E+05 | 1.50E+06 | 9.81E+05 |
| 4.32E+05 | 4.50E+05 | 4.60E+05 | 1.16E+06 | 9.92E+05 | 2.84E+06 | 5.82E+05 | 1.14E+06 | 9.24E+05 |
| 2.50E+05 | 2.37E+05 | 2.49E+05 | 4.25E+05 | 3.22E+05 | 1.02E+06 | 1.38E+05 | 4.26E+05 | 3.28E+05 |
| 2.77E+07 | 2.43E+07 | 2.57E+07 | 1.99E+07 | 2.10E+07 | 3.18E+07 | 1.09E+07 | 2.24E+07 | 1.79E+07 |
| 5.62E+04 | 5.11E+04 | 5.92E+04 | 1.61E+06 | 1.45E+06 | 1.97E+06 | 3.34E+05 | 1.35E+06 | 8.78E+05 |
| 6.69E+05 | 6.33E+05 | 9.14E+05 | 1.55E+05 | 2.43E+05 | 2.10E+05 | 2.47E+05 | 2.85E+05 | 1.76E+05 |
| 4.84E+05 | 5.21E+05 | 4.78E+05 | 2.65E+05 | 3.37E+05 | 4.34E+05 | 3.72E+05 | 2.67E+05 | 3.57E+05 |
| 1.72E+05 | 1.92E+05 | 4.21E+04 | 1.60E+05 | 1.68E+05 | 3.29E+05 | 1.57E+05 | 2.52E+05 | 2.03E+05 |
| 3.96E+06 | 4.04E+06 | 3.87E+06 | 1.61E+06 | 1.48E+06 | 4.87E+06 | 1.04E+06 | 1.71E+06 | 1.67E+06 |
| 2.66E+05 | 2.75E+05 | 2.58E+05 | 2.51E+06 | 2.32E+06 | 6.80E+06 | 1.16E+06 | 3.23E+06 | 1.74E+06 |
| 5.06E+06 | 5.24E+06 | 5.01E+06 | 1.59E+07 | 1.46E+07 | 2.66E+07 | 6.21E+06 | 1.33E+07 | 1.00E+07 |
| 7.67E+05 | 6.84E+05 | 5.79E+05 | 4.58E+05 | 4.47E+05 | 8.49E+05 | 3.26E+05 | 4.30E+05 | 4.52E+05 |
| 5.20E+05 | 4.50E+05 | 4.62E+05 | 1.83E+06 | 1.37E+06 | 5.09E+06 | 6.04E+05 | 1.55E+06 | 1.09E+06 |
| 4.56E+05 | 4.90E+05 | 4.93E+05 | 2.19E+06 | 1.72E+06 | 5.00E+06 | 4.58E+05 | 1.53E+06 | 1.62E+06 |
| 9.00E+00 | 9.00E+00 | 9.00E+00 | 6.01E+05 | 5.60E+05 | 4.47E+05 | 6.32E+05 | 6.05E+05 | 5.28E+05 |
| 9.00E+00 | 4.43E+04 | 9.00E+00 | 2.23E+05 | 2.04E+05 | 2.32E+05 | 2.33E+05 | 1.88E+05 | 1.89E+05 |
| 9.00E+00 | 9.00E+00 | 9.00E+00 | 2.23E+05 | 2.22E+05 | 2.72E+05 | 2.27E+05 | 2.21E+05 | 2.09E+05 |
| 1.01E+05 | 7.33E+04 | 6.17E+04 | 9.80E+04 | 1.04E+05 | 1.32E+05 | 1.24E+05 | 1.59E+05 | 1.18E+05 |
| 2.64E+04 | 1.32E+04 | 7.84E+03 | 1.58E+05 | 1.04E+05 | 1.57E+05 | 1.49E+05 | 1.80E+05 | 4.13E+05 |
| 1.90E+05 | 1.72E+05 | 1.81E+05 | 1.45E+04 | 3.13E+04 | 2.13E+04 | 2.60E+04 | 1.47E+04 | 1.63E+04 |
| 1.53E+04 | 2.34E+04 | 1.50E+04 | 4.08E+04 | 4.10E+04 | 6.11E+04 | 3.75E+04 | 4.72E+04 | 4.43E+04 |
| 1.94E+04 | 2.27E+04 | 1.35E+04 | 5.71E+04 | 6.28E+04 | 8.33E+04 | 8.01E+04 | 8.07E+04 | 1.06E+05 |
| 1.39E+04 | 1.40E+04 | 9.04E+03 | 6.22E+04 | 5.34E+04 | 8.13E+04 | 5.64E+04 | 1.02E+05 | 1.16E+05 |
| 2.68E+04 | 5.43E+04 | 1.97E+04 | 8.98E+04 | 8.85E+04 | 1.98E+05 | 1.03E+05 | 1.12E+05 | 1.73E+05 |
| 1.18E+05 | 1.21E+05 | 7.06E+04 | 9.00E+00 | 9.00E+00 | 9.00E+00 | 9.00E+00 | 9.00E+00 | 9.00E+00 |
| 9.65E+03 | 1.94E+03 | 1.57E+03 | 2.75E+04 | 1.89E+04 | 1.74E+04 | 1.47E+04 | 3.20E+04 | 2.63E+04 |
| 2.45E+03 | 1.23E+03 | 2.00E+03 | 4.29E+04 | 4.33E+04 | 4.01E+04 | 5.10E+04 | 7.65E+04 | 4.94E+04 |
| 2.97E+04 | 3.42E+04 | 4.03E+04 | 5.25E+03 | 1.32E+04 | 1.04E+04 | 9.39E+03 | 1.18E+04 | 8.52E+03 |
| 2.23E+04 | 1.31E+04 | 1.35E+04 | 9.00E+00 | 9.00E+00 | 9.00E+00 | 9.00E+00 | 9.00E+00 | 9.00E+00 |
| 6.81E+05 | 6.95E+05 | 5.59E+05 | 1.07E+06 | 9.09E+05 | 8.40E+05 | 1.17E+06 | 1.30E+06 | 9.85E+05 |
| 2.36E+04 | 2.95E+04 | 3.00E+04 | 6.40E+04 | 3.14E+04 | 1.51E+05 | 7.14E+04 | 3.15E+04 | 3.12E+04 |

|          |          |          |          |          |          |          |          |          |
|----------|----------|----------|----------|----------|----------|----------|----------|----------|
| 1.04E+05 | 1.09E+05 | 8.32E+04 | 4.38E+04 | 3.82E+04 | 4.03E+04 | 6.88E+04 | 8.02E+04 | 5.24E+04 |
| 1.35E+07 | 1.45E+07 | 1.07E+07 | 1.80E+05 | 1.47E+05 | 2.50E+05 | 6.22E+04 | 2.44E+05 | 1.33E+05 |
| 4.45E+06 | 4.66E+06 | 4.80E+06 | 3.15E+04 | 1.74E+04 | 3.36E+04 | 3.16E+04 | 2.22E+04 | 1.60E+04 |
| 3.23E+06 | 4.25E+06 | 2.25E+06 | 2.53E+05 | 2.14E+05 | 3.01E+05 | 1.74E+05 | 2.69E+05 | 1.46E+05 |
| 8.88E+06 | 9.54E+06 | 8.39E+06 | 5.33E+04 | 1.67E+04 | 7.27E+04 | 5.31E+04 | 3.72E+04 | 2.17E+04 |
| 1.44E+04 | 2.08E+04 | 1.39E+04 | 9.00E+00 | 9.00E+00 | 9.00E+00 | 9.00E+00 | 9.00E+00 | 9.00E+00 |
| 7.29E+06 | 9.61E+06 | 5.91E+06 | 1.01E+06 | 9.26E+05 | 1.06E+06 | 1.11E+06 | 1.34E+06 | 9.20E+05 |
| 2.80E+07 | 3.01E+07 | 2.94E+07 | 1.53E+05 | 6.55E+04 | 1.75E+05 | 1.57E+05 | 1.25E+05 | 5.10E+04 |
| 8.51E+03 | 1.14E+04 | 5.95E+03 | 3.14E+04 | 2.96E+04 | 3.37E+04 | 3.42E+04 | 3.62E+04 | 2.89E+04 |
| 5.24E+06 | 5.82E+06 | 3.97E+06 | 6.40E+05 | 1.01E+06 | 8.38E+05 | 7.81E+05 | 1.18E+06 | 6.15E+05 |
| 4.23E+04 | 7.39E+04 | 4.65E+04 | 9.05E+04 | 9.50E+04 | 9.25E+04 | 6.50E+04 | 1.09E+05 | 8.16E+04 |
| 1.30E+07 | 1.35E+07 | 9.87E+06 | 8.88E+05 | 1.06E+06 | 1.30E+06 | 1.08E+06 | 1.48E+06 | 1.13E+06 |
| 1.81E+07 | 1.80E+07 | 2.11E+07 | 1.65E+05 | 7.79E+04 | 1.91E+05 | 1.33E+05 | 1.47E+05 | 6.05E+04 |
| 6.44E+05 | 5.52E+05 | 3.87E+05 | 1.08E+05 | 1.45E+05 | 1.12E+05 | 7.31E+04 | 1.38E+05 | 9.59E+04 |
| 2.88E+04 | 3.95E+04 | 3.33E+04 | 1.72E+05 | 1.18E+05 | 1.20E+05 | 1.67E+05 | 1.39E+05 | 1.44E+05 |
| 9.08E+04 | 6.98E+04 | 7.82E+04 | 2.72E+03 | 1.51E+04 | 8.53E+03 | 7.39E+03 | 6.73E+03 | 1.13E+04 |
| 9.00E+00 | 4.60E+03 | 1.61E+03 | 2.44E+04 | 1.62E+04 | 1.97E+04 | 9.03E+03 | 1.14E+04 | 1.79E+04 |
| 1.66E+06 | 1.62E+06 | 1.55E+06 | 3.72E+03 | 1.17E+03 | 5.64E+03 | 2.03E+03 | 2.72E+03 | 3.25E+03 |
| 3.77E+05 | 5.16E+05 | 3.63E+05 | 3.56E+03 | 8.62E+03 | 2.02E+04 | 9.55E+03 | 5.56E+03 | 5.11E+03 |
| 8.76E+05 | 1.10E+06 | 6.40E+05 | 1.62E+04 | 1.65E+04 | 1.49E+04 | 1.45E+04 | 1.38E+04 | 1.32E+04 |
| 9.26E+05 | 1.05E+06 | 7.82E+05 | 1.32E+04 | 1.01E+04 | 1.95E+04 | 2.92E+04 | 1.35E+04 | 4.64E+03 |
| 2.45E+06 | 2.85E+06 | 1.89E+06 | 2.60E+03 | 2.24E+03 | 9.00E+00 | 3.87E+03 | 5.67E+03 | 9.00E+00 |
| 1.91E+04 | 1.07E+04 | 4.89E+03 | 9.69E+03 | 6.63E+03 | 3.20E+04 | 9.33E+03 | 6.66E+03 | 1.78E+04 |
| 1.81E+04 | 9.25E+03 | 1.01E+04 | 9.33E+03 | 9.25E+03 | 3.93E+04 | 1.25E+04 | 1.69E+04 | 1.29E+04 |
| 1.04E+05 | 7.97E+04 | 7.57E+04 | 6.96E+04 | 4.90E+04 | 9.68E+04 | 3.63E+04 | 6.48E+04 | 5.65E+04 |
| 1.10E+04 | 7.23E+03 | 6.71E+03 | 9.15E+03 | 7.36E+03 | 7.08E+03 | 6.41E+03 | 5.34E+03 | 9.33E+03 |
| 5.07E+04 | 4.19E+04 | 2.90E+04 | 1.63E+04 | 1.59E+04 | 1.93E+04 | 1.81E+04 | 2.58E+04 | 3.02E+04 |
| 1.05E+06 | 8.31E+05 | 7.96E+05 | 6.49E+05 | 5.12E+05 | 8.46E+05 | 5.67E+05 | 6.91E+05 | 6.05E+05 |
| 8.96E+03 | 1.23E+04 | 8.17E+03 | 3.74E+03 | 4.91E+03 | 1.21E+04 | 2.85E+03 | 5.36E+03 | 3.49E+03 |
| 4.42E+05 | 3.14E+05 | 3.49E+05 | 9.00E+00 | 9.00E+00 | 5.37E+03 | 7.86E+03 | 3.15E+03 | 9.00E+00 |
| 9.00E+00 | 9.00E+00 | 9.00E+00 | 2.82E+04 | 8.12E+03 | 5.44E+04 | 1.19E+04 | 4.58E+04 | 3.03E+03 |
| 9.00E+00 | 3.35E+03 | 9.00E+00 | 7.34E+04 | 8.10E+04 | 6.94E+04 | 4.34E+04 | 6.96E+04 | 4.33E+04 |
| 9.00E+00 | 9.00E+00 | 9.00E+00 | 3.37E+04 | 2.68E+04 | 2.10E+04 | 2.24E+04 | 4.21E+04 | 2.90E+04 |
| 6.20E+04 | 6.12E+04 | 4.24E+04 | 3.59E+04 | 3.98E+04 | 3.70E+04 | 3.99E+04 | 4.01E+04 | 3.70E+04 |
| 9.42E+04 | 8.86E+04 | 1.53E+04 | 2.70E+04 | 2.23E+04 | 3.18E+04 | 2.65E+04 | 2.66E+04 | 2.06E+04 |
| 1.75E+06 | 1.43E+06 | 1.56E+06 | 1.00E+06 | 8.69E+05 | 1.33E+06 | 1.04E+06 | 1.16E+06 | 1.13E+06 |
| 4.91E+04 | 3.94E+04 | 3.66E+04 | 3.11E+04 | 1.37E+04 | 3.15E+04 | 2.90E+04 | 2.42E+04 | 2.01E+04 |
| 1.11E+06 | 1.74E+06 | 1.07E+06 | 9.00E+00 | 9.00E+00 | 4.35E+04 | 2.22E+03 | 9.00E+00 | 9.00E+00 |
| 1.44E+05 | 1.68E+05 | 1.27E+05 | 9.00E+00 | 9.00E+00 | 9.00E+00 | 9.00E+00 | 9.00E+00 | 9.00E+00 |
| 9.18E+04 | 9.28E+04 | 8.11E+04 | 4.16E+04 | 5.52E+04 | 8.13E+04 | 7.86E+04 | 4.68E+04 | 5.16E+04 |
| 6.12E+04 | 7.36E+04 | 7.57E+04 | 4.99E+04 | 4.99E+04 | 8.35E+04 | 4.02E+04 | 4.67E+04 | 5.57E+04 |
| 9.00E+00 | 2.61E+03 | 9.00E+00 | 9.09E+04 | 6.35E+04 | 8.17E+04 | 9.95E+04 | 4.20E+04 | 2.26E+04 |
| 9.00E+00 | 9.00E+00 | 1.23E+03 | 1.26E+05 | 7.70E+04 | 8.27E+04 | 1.01E+05 | 8.35E+04 | 4.72E+04 |
| 9.00E+00 | 3.59E+03 | 9.00E+00 | 2.12E+04 | 1.87E+04 | 1.65E+04 | 1.60E+04 | 1.16E+04 | 8.98E+03 |
| 2.89E+04 | 3.21E+04 | 2.21E+04 | 9.00E+00 | 5.31E+02 | 9.00E+00 | 9.00E+00 | 9.00E+00 | 9.00E+00 |
| 4.61E+05 | 3.92E+05 | 3.36E+05 | 9.58E+04 | 2.06E+04 | 1.10E+05 | 5.18E+04 | 1.03E+05 | 1.73E+05 |
| 9.06E+06 | 1.23E+07 | 8.03E+06 | 5.80E+06 | 4.99E+06 | 7.72E+06 | 2.89E+06 | 6.10E+06 | 4.52E+06 |
| 4.64E+05 | 4.55E+05 | 3.80E+05 | 3.36E+05 | 3.32E+05 | 4.07E+05 | 4.22E+04 | 3.15E+05 | 1.98E+05 |
| 1.05E+06 | 2.64E+05 | 7.52E+05 | 3.45E+05 | 3.10E+05 | 4.05E+05 | 4.09E+05 | 3.42E+05 | 2.95E+05 |
| 6.82E+05 | 7.92E+05 | 6.56E+05 | 6.95E+06 | 6.80E+06 | 6.14E+06 | 5.69E+06 | 9.01E+06 | 7.43E+06 |
| 5.48E+04 | 7.71E+04 | 2.95E+04 | 5.60E+06 | 5.87E+06 | 4.51E+06 | 9.10E+06 | 9.76E+06 | 6.25E+06 |
| 1.91E+05 | 2.72E+05 | 2.10E+05 | 1.49E+06 | 1.59E+06 | 1.30E+06 | 2.15E+06 | 2.22E+06 | 1.73E+06 |
| 2.08E+05 | 2.13E+05 | 1.78E+05 | 9.00E+00 | 9.00E+00 | 1.49E+04 | 9.00E+00 | 9.00E+00 | 9.00E+00 |
| 3.93E+03 | 1.59E+03 | 1.19E+03 | 3.28E+04 | 3.92E+04 | 3.86E+04 | 2.60E+03 | 3.38E+04 | 1.44E+04 |

|          |          |          |          |          |          |          |          |          |
|----------|----------|----------|----------|----------|----------|----------|----------|----------|
| 5.67E+04 | 9.01E+04 | 5.45E+04 | 1.01E+06 | 9.01E+05 | 1.16E+06 | 3.44E+05 | 9.51E+05 | 6.31E+05 |
| 9.00E+00 | 7.84E+02 | 7.75E+02 | 5.77E+04 | 6.43E+04 | 6.50E+04 | 3.36E+04 | 5.76E+04 | 4.11E+04 |
| 2.93E+04 | 4.83E+04 | 6.64E+04 | 5.75E+04 | 8.87E+04 | 1.85E+05 | 5.85E+04 | 2.00E+05 | 8.44E+04 |
| 7.74E+04 | 8.15E+04 | 3.53E+04 | 3.17E+05 | 3.40E+05 | 2.33E+05 | 5.26E+05 | 4.37E+05 | 3.72E+05 |
| 8.58E+04 | 1.04E+05 | 7.37E+04 | 2.05E+05 | 1.70E+05 | 1.72E+05 | 1.29E+05 | 1.91E+05 | 1.85E+05 |
| 4.65E+04 | 4.51E+04 | 5.16E+04 | 3.09E+04 | 2.66E+04 | 2.15E+04 | 1.54E+04 | 2.51E+04 | 2.04E+04 |
| 1.33E+05 | 1.49E+05 | 1.32E+05 | 8.69E+04 | 6.94E+04 | 6.36E+04 | 8.17E+04 | 9.77E+04 | 6.20E+04 |
| 2.72E+04 | 3.11E+04 | 3.09E+04 | 7.44E+04 | 1.33E+05 | 1.69E+05 | 3.70E+04 | 1.67E+05 | 5.93E+04 |
| 1.90E+04 | 9.00E+00 | 1.29E+04 | 3.08E+04 | 3.00E+04 | 1.98E+04 | 2.73E+04 | 3.12E+04 | 3.16E+04 |
| 6.63E+03 | 4.47E+03 | 4.97E+03 | 6.00E+03 | 9.33E+03 | 4.40E+04 | 2.82E+03 | 4.47E+03 | 5.11E+03 |
| 9.00E+00 | 9.00E+00 | 9.00E+00 | 9.13E+03 | 1.44E+04 | 3.25E+04 | 8.13E+03 | 1.61E+04 | 1.84E+04 |
| 1.36E+04 | 8.79E+03 | 1.04E+04 | 1.44E+04 | 1.28E+04 | 3.21E+04 | 1.20E+04 | 1.58E+04 | 1.38E+04 |
| 8.84E+03 | 9.14E+03 | 9.71E+03 | 1.22E+04 | 1.22E+04 | 3.21E+04 | 1.28E+04 | 1.08E+04 | 1.08E+04 |
| 7.19E+03 | 2.56E+03 | 2.65E+03 | 1.02E+04 | 7.78E+03 | 2.46E+04 | 4.86E+03 | 8.71E+03 | 7.74E+03 |
| 1.99E+05 | 2.12E+05 | 1.99E+05 | 3.48E+05 | 3.82E+05 | 4.92E+05 | 2.42E+05 | 3.11E+05 | 3.98E+05 |
| 2.85E+06 | 2.97E+06 | 2.88E+06 | 1.33E+06 | 1.47E+06 | 1.74E+06 | 9.31E+05 | 1.21E+06 | 1.52E+06 |
| 1.23E+06 | 1.39E+06 | 1.08E+06 | 2.00E+07 | 1.88E+07 | 1.80E+07 | 2.38E+07 | 1.85E+07 | 2.16E+07 |
| 5.20E+04 | 6.05E+04 | 5.02E+04 | 2.47E+05 | 2.64E+05 | 3.33E+05 | 2.86E+05 | 2.35E+05 | 3.06E+05 |
| 2.95E+06 | 2.70E+06 | 3.03E+06 | 3.32E+06 | 3.36E+06 | 4.16E+06 | 1.39E+06 | 2.74E+06 | 3.23E+06 |
| 1.01E+05 | 1.16E+05 | 9.08E+04 | 1.17E+07 | 1.24E+07 | 1.47E+07 | 7.71E+06 | 1.16E+07 | 1.24E+07 |
| 3.36E+04 | 4.52E+04 | 2.84E+04 | 7.54E+05 | 1.90E+06 | 1.33E+06 | 1.58E+06 | 1.22E+06 | 1.67E+06 |
| 1.54E+05 | 1.34E+05 | 1.02E+05 | 2.97E+05 | 3.30E+05 | 2.58E+05 | 2.25E+05 | 2.22E+05 | 3.75E+05 |
| 2.62E+06 | 2.56E+06 | 2.22E+06 | 2.11E+06 | 1.95E+06 | 2.62E+06 | 7.23E+05 | 1.59E+06 | 1.65E+06 |
| 6.28E+05 | 6.96E+05 | 6.72E+05 | 1.49E+07 | 1.31E+07 | 1.84E+07 | 7.46E+06 | 1.02E+07 | 1.18E+07 |
| 1.19E+05 | 1.06E+05 | 9.97E+04 | 7.02E+04 | 9.37E+04 | 1.02E+05 | 4.28E+04 | 7.11E+04 | 8.27E+04 |
| 6.15E+06 | 5.63E+06 | 6.32E+06 | 4.33E+06 | 3.79E+06 | 7.14E+06 | 2.84E+06 | 3.26E+06 | 3.93E+06 |
| 4.12E+06 | 3.66E+06 | 4.16E+06 | 2.10E+07 | 2.01E+07 | 1.79E+07 | 1.47E+07 | 1.60E+07 | 1.77E+07 |
| 4.58E+05 | 8.93E+05 | 4.27E+05 | 2.92E+06 | 2.70E+06 | 2.90E+06 | 1.42E+06 | 1.69E+06 | 2.59E+06 |
| 2.18E+05 | 2.54E+05 | 2.14E+05 | 4.81E+06 | 4.64E+06 | 4.39E+06 | 3.99E+06 | 3.51E+06 | 5.64E+06 |
| 1.13E+06 | 1.26E+06 | 1.10E+06 | 5.33E+06 | 5.13E+06 | 5.54E+06 | 3.97E+06 | 5.10E+06 | 4.63E+06 |
| 5.35E+06 | 5.12E+06 | 4.43E+06 | 1.47E+07 | 1.58E+07 | 1.34E+07 | 5.32E+06 | 1.22E+07 | 1.38E+07 |
| 3.18E+04 | 1.51E+04 | 3.44E+04 | 2.89E+05 | 1.46E+05 | 2.38E+05 | 2.24E+05 | 2.68E+05 | 2.72E+05 |
| 6.67E+03 | 7.42E+03 | 3.69E+03 | 3.20E+04 | 3.19E+04 | 3.01E+04 | 2.23E+04 | 2.16E+04 | 2.54E+04 |
| 1.43E+06 | 1.60E+06 | 1.26E+06 | 2.00E+07 | 1.99E+07 | 1.76E+07 | 2.57E+07 | 1.96E+07 | 2.33E+07 |
| 2.76E+05 | 2.73E+05 | 2.67E+05 | 3.93E+06 | 3.59E+06 | 3.04E+06 | 2.24E+06 | 3.01E+06 | 3.77E+06 |
| 4.09E+05 | 4.60E+05 | 3.87E+05 | 3.73E+06 | 3.77E+06 | 4.09E+06 | 3.45E+06 | 4.47E+06 | 3.83E+06 |
| 3.05E+05 | 3.19E+05 | 6.77E+05 | 8.69E+05 | 8.10E+05 | 1.39E+06 | 7.99E+05 | 1.08E+06 | 8.15E+05 |
| 9.96E+04 | 1.09E+05 | 8.29E+04 | 1.11E+07 | 1.19E+07 | 1.44E+07 | 7.72E+06 | 1.12E+07 | 1.21E+07 |
| 2.18E+05 | 2.92E+05 | 2.03E+05 | 1.62E+07 | 1.39E+07 | 1.42E+07 | 1.18E+07 | 1.17E+07 | 1.46E+07 |
| 5.19E+03 | 8.77E+03 | 2.83E+03 | 2.98E+05 | 2.11E+05 | 2.29E+05 | 1.49E+05 | 1.26E+05 | 1.86E+05 |
| 1.51E+05 | 1.80E+05 | 1.14E+05 | 6.90E+06 | 7.29E+06 | 5.09E+06 | 7.06E+06 | 6.08E+06 | 7.16E+06 |
| 1.13E+05 | 1.27E+05 | 1.12E+05 | 2.10E+06 | 2.04E+06 | 2.09E+06 | 1.23E+06 | 1.85E+06 | 2.44E+06 |
| 1.93E+05 | 2.46E+05 | 1.43E+05 | 8.22E+05 | 6.45E+05 | 9.22E+05 | 6.15E+05 | 6.53E+05 | 7.66E+05 |
| 2.98E+06 | 3.53E+06 | 2.79E+06 | 6.46E+06 | 6.09E+06 | 8.18E+06 | 3.20E+06 | 5.88E+06 | 6.99E+06 |
| 8.07E+05 | 8.37E+05 | 7.54E+05 | 6.79E+06 | 6.30E+06 | 6.28E+06 | 5.87E+06 | 5.93E+06 | 8.36E+06 |
| 4.30E+06 | 3.98E+06 | 4.12E+06 | 1.12E+08 | 1.15E+08 | 1.28E+08 | 3.91E+07 | 7.74E+07 | 9.14E+07 |
| 2.87E+06 | 2.75E+06 | 2.99E+06 | 8.99E+06 | 9.51E+06 | 8.31E+06 | 6.67E+06 | 7.10E+06 | 8.49E+06 |
| 6.49E+05 | 8.71E+05 | 5.09E+05 | 5.81E+07 | 4.88E+07 | 4.23E+07 | 1.58E+07 | 2.97E+07 | 3.40E+07 |
| 6.68E+04 | 6.12E+04 | 5.19E+04 | 1.30E+05 | 1.29E+05 | 1.69E+05 | 1.61E+05 | 8.77E+04 | 1.14E+05 |
| 8.33E+04 | 1.10E+05 | 7.41E+04 | 1.22E+05 | 1.08E+05 | 2.17E+05 | 1.00E+05 | 1.23E+05 | 9.88E+04 |
| 1.03E+04 | 2.70E+04 | 1.53E+04 | 1.19E+05 | 1.26E+05 | 2.54E+05 | 1.17E+05 | 1.36E+05 | 1.44E+05 |
| 6.72E+05 | 7.09E+05 | 7.01E+05 | 5.68E+05 | 4.52E+05 | 9.33E+05 | 6.91E+05 | 4.39E+05 | 4.92E+05 |
| 5.54E+05 | 5.15E+05 | 5.43E+05 | 7.61E+06 | 6.90E+06 | 7.75E+06 | 4.53E+06 | 5.58E+06 | 4.77E+06 |
| 2.80E+07 | 2.41E+07 | 2.81E+07 | 1.56E+08 | 1.50E+08 | 1.34E+08 | 1.11E+08 | 1.20E+08 | 1.31E+08 |



|          |          |          |          |          |          |          |          |          |
|----------|----------|----------|----------|----------|----------|----------|----------|----------|
| 1.15E+04 | 6.17E+04 | 2.58E+04 | 1.70E+05 | 1.27E+05 | 2.68E+05 | 1.24E+05 | 1.12E+05 | 2.32E+05 |
| 4.19E+04 | 6.32E+04 | 4.29E+04 | 1.09E+05 | 8.60E+04 | 1.75E+05 | 1.17E+05 | 7.83E+04 | 1.13E+05 |
| 1.89E+03 | 5.31E+03 | 2.58E+03 | 2.71E+04 | 2.26E+04 | 9.03E+04 | 3.59E+04 | 2.76E+04 | 3.37E+04 |
| 3.96E+04 | 5.24E+04 | 4.03E+04 | 1.82E+04 | 8.55E+03 | 1.55E+04 | 1.73E+04 | 1.94E+04 | 1.85E+04 |
| 7.12E+03 | 9.85E+03 | 5.85E+03 | 1.08E+05 | 1.19E+05 | 1.56E+05 | 9.44E+04 | 1.16E+05 | 9.38E+04 |
| 9.00E+00 | 9.00E+00 | 9.00E+00 | 1.80E+04 | 1.92E+04 | 3.17E+04 | 2.18E+04 | 1.55E+04 | 1.32E+04 |
| 6.55E+05 | 8.08E+05 | 5.55E+05 | 1.18E+07 | 1.17E+07 | 1.39E+07 | 1.18E+07 | 1.38E+07 | 1.11E+07 |
| 3.90E+05 | 4.26E+05 | 3.29E+05 | 3.29E+05 | 3.48E+05 | 3.46E+06 | 2.75E+05 | 3.50E+05 | 2.70E+05 |
| 1.95E+05 | 2.30E+05 | 1.81E+05 | 3.08E+06 | 3.09E+06 | 3.74E+06 | 3.16E+06 | 3.31E+06 | 2.70E+06 |
| 4.66E+05 | 5.11E+05 | 4.11E+05 | 9.01E+06 | 7.94E+06 | 1.08E+07 | 1.13E+07 | 1.17E+07 | 1.00E+07 |
| 5.34E+03 | 6.05E+03 | 5.36E+03 | 7.02E+05 | 7.93E+05 | 9.49E+05 | 1.39E+06 | 8.46E+05 | 8.15E+05 |
| 1.25E+04 | 1.58E+04 | 1.00E+04 | 2.90E+05 | 2.06E+05 | 2.85E+05 | 1.63E+05 | 2.46E+05 | 1.70E+05 |
| 7.36E+03 | 8.05E+03 | 6.79E+03 | 1.70E+05 | 1.49E+05 | 1.93E+05 | 1.51E+05 | 1.74E+05 | 1.19E+05 |
| 9.00E+00 | 9.00E+00 | 9.00E+00 | 1.69E+05 | 2.02E+05 | 2.30E+05 | 3.40E+05 | 2.23E+05 | 2.22E+05 |
| 9.00E+00 | 9.00E+00 | 9.00E+00 | 4.05E+04 | 4.85E+04 | 4.79E+04 | 6.46E+04 | 5.14E+04 | 4.00E+04 |
| 4.78E+03 | 3.85E+03 | 9.00E+00 | 6.69E+04 | 7.45E+04 | 9.07E+04 | 5.31E+04 | 7.46E+04 | 7.50E+04 |
| 7.00E+03 | 6.71E+03 | 6.53E+03 | 1.31E+04 | 2.08E+04 | 1.44E+04 | 1.64E+04 | 1.40E+04 | 1.12E+04 |
| 9.00E+00 | 9.00E+00 | 9.00E+00 | 3.27E+04 | 6.35E+04 | 3.69E+04 | 6.84E+04 | 3.68E+04 | 4.00E+04 |
| 3.42E+03 | 3.42E+03 | 9.00E+00 | 1.78E+04 | 1.68E+04 | 3.34E+04 | 2.34E+04 | 2.73E+04 | 1.88E+04 |
| 2.88E+03 | 3.66E+03 | 3.73E+03 | 3.03E+04 | 4.02E+04 | 3.34E+04 | 3.30E+04 | 2.79E+04 | 3.71E+04 |
| 5.90E+05 | 5.96E+05 | 6.28E+05 | 1.37E+05 | 1.58E+05 | 3.92E+05 | 9.00E+00 | 1.72E+05 | 1.20E+05 |
| 6.65E+06 | 7.67E+06 | 5.91E+06 | 2.08E+07 | 2.10E+07 | 3.60E+07 | 1.47E+07 | 2.92E+07 | 1.87E+07 |
| 6.32E+06 | 6.18E+06 | 6.31E+06 | 1.69E+06 | 9.88E+05 | 4.41E+06 | 1.03E+06 | 1.67E+06 | 8.78E+05 |
| 2.16E+05 | 2.68E+05 | 2.26E+05 | 7.51E+06 | 7.24E+06 | 1.40E+07 | 4.80E+06 | 9.08E+06 | 6.23E+06 |
| 2.19E+06 | 1.64E+06 | 1.80E+06 | 1.32E+05 | 1.07E+05 | 2.96E+05 | 1.22E+05 | 1.32E+05 | 1.02E+05 |
| 1.09E+05 | 1.03E+05 | 9.83E+04 | 2.63E+05 | 2.40E+05 | 7.10E+05 | 1.14E+05 | 2.18E+05 | 2.14E+05 |
| 5.22E+05 | 4.92E+05 | 5.48E+05 | 1.54E+06 | 1.71E+06 | 2.19E+06 | 5.26E+05 | 1.63E+06 | 1.18E+06 |
| 5.04E+05 | 4.24E+05 | 5.25E+05 | 1.54E+06 | 1.64E+06 | 2.92E+06 | 8.57E+05 | 1.55E+06 | 1.02E+06 |
| 1.32E+06 | 1.61E+06 | 1.13E+06 | 1.48E+07 | 1.35E+07 | 2.23E+07 | 9.07E+06 | 1.51E+07 | 1.07E+07 |
| 2.72E+04 | 3.01E+04 | 3.18E+04 | 2.76E+05 | 3.09E+05 | 5.04E+05 | 6.85E+04 | 2.91E+05 | 2.09E+05 |
| 3.05E+04 | 3.76E+04 | 2.90E+04 | 5.96E+05 | 5.85E+05 | 1.02E+06 | 6.01E+05 | 7.79E+05 | 6.38E+05 |
| 9.00E+00 | 3.80E+03 | 9.00E+00 | 9.69E+04 | 5.66E+04 | 1.14E+05 | 4.56E+04 | 8.38E+04 | 8.11E+04 |
| 6.37E+06 | 7.29E+06 | 5.53E+06 | 2.10E+07 | 2.02E+07 | 3.79E+07 | 1.37E+07 | 2.95E+07 | 1.75E+07 |
| 1.52E+06 | 1.77E+06 | 1.71E+06 | 9.95E+06 | 1.01E+07 | 1.44E+07 | 6.12E+06 | 1.21E+07 | 9.59E+06 |
| 4.56E+04 | 7.47E+04 | 4.37E+04 | 1.14E+06 | 1.20E+06 | 1.93E+06 | 9.69E+05 | 1.44E+06 | 9.34E+05 |
| 9.00E+00 | 9.00E+00 | 9.00E+00 | 1.01E+05 | 8.54E+04 | 2.63E+05 | 8.73E+04 | 1.13E+05 | 6.96E+04 |
| 9.00E+00 | 9.00E+00 | 9.00E+00 | 9.82E+03 | 1.11E+04 | 1.31E+04 | 1.02E+04 | 1.24E+04 | 1.82E+04 |
| 9.87E+03 | 1.37E+04 | 7.49E+03 | 3.13E+04 | 2.69E+04 | 7.83E+04 | 1.24E+04 | 2.63E+04 | 2.00E+04 |
| 1.01E+05 | 3.32E+05 | 1.86E+05 | 4.65E+05 | 3.72E+05 | 8.77E+05 | 1.64E+05 | 4.87E+05 | 3.40E+05 |
| 1.47E+05 | 1.19E+05 | 1.22E+05 | 1.56E+05 | 1.67E+05 | 2.32E+05 | 1.22E+05 | 1.85E+05 | 1.75E+05 |
| 5.04E+05 | 5.22E+05 | 5.77E+05 | 1.61E+06 | 1.84E+06 | 2.41E+06 | 4.93E+05 | 1.76E+06 | 1.19E+06 |
| 8.39E+06 | 7.94E+06 | 8.38E+06 | 1.03E+07 | 1.14E+07 | 1.42E+07 | 7.68E+06 | 1.24E+07 | 1.05E+07 |
| 5.82E+04 | 6.25E+04 | 4.06E+04 | 1.03E+06 | 1.03E+06 | 1.24E+06 | 2.46E+05 | 9.56E+05 | 6.10E+05 |
| 3.96E+04 | 3.38E+04 | 3.52E+04 | 5.18E+03 | 7.21E+03 | 3.21E+04 | 6.87E+03 | 7.95E+03 | 5.33E+03 |
| 5.06E+04 | 5.03E+04 | 5.16E+04 | 8.74E+03 | 1.26E+04 | 3.97E+04 | 1.04E+04 | 9.71E+03 | 1.13E+04 |
| 4.15E+05 | 3.89E+05 | 4.15E+05 | 4.30E+04 | 4.47E+04 | 8.65E+04 | 5.19E+04 | 4.03E+04 | 3.77E+04 |
| 6.20E+06 | 5.45E+06 | 6.03E+06 | 6.15E+05 | 6.11E+05 | 1.54E+06 | 5.94E+05 | 6.39E+05 | 6.01E+05 |
| 4.81E+05 | 4.38E+05 | 4.89E+05 | 3.75E+05 | 2.73E+05 | 1.19E+06 | 1.80E+05 | 2.88E+05 | 2.73E+05 |
| 3.35E+07 | 3.10E+07 | 3.38E+07 | 2.57E+07 | 2.39E+07 | 3.29E+07 | 1.43E+07 | 2.44E+07 | 1.95E+07 |
| 3.75E+05 | 3.70E+05 | 2.82E+05 | 2.61E+05 | 2.27E+05 | 5.28E+06 | 2.14E+05 | 3.22E+05 | 2.35E+05 |
| 1.46E+04 | 2.16E+04 | 1.26E+04 | 7.82E+03 | 8.53E+03 | 1.26E+05 | 1.03E+04 | 1.34E+04 | 7.44E+03 |
| 6.85E+05 | 8.63E+05 | 6.01E+05 | 1.31E+05 | 1.16E+05 | 1.77E+06 | 1.72E+05 | 1.76E+05 | 9.09E+04 |
| 6.33E+05 | 6.55E+05 | 4.95E+05 | 6.82E+04 | 5.21E+04 | 2.58E+06 | 6.76E+04 | 8.86E+04 | 6.20E+04 |
| 1.98E+04 | 1.91E+04 | 1.20E+04 | 1.42E+04 | 1.56E+04 | 6.53E+04 | 1.35E+04 | 2.49E+04 | 7.94E+03 |

|          |          |          |          |          |          |          |          |          |
|----------|----------|----------|----------|----------|----------|----------|----------|----------|
| 3.70E+04 | 2.55E+04 | 2.49E+04 | 9.07E+04 | 7.29E+04 | 2.31E+05 | 4.86E+04 | 8.52E+04 | 6.72E+04 |
| 1.04E+04 | 8.32E+03 | 7.14E+03 | 6.09E+03 | 7.08E+03 | 7.79E+03 | 2.31E+03 | 4.10E+03 | 7.59E+03 |
| 1.40E+04 | 1.21E+04 | 1.11E+04 | 3.87E+04 | 4.18E+04 | 1.07E+05 | 3.33E+04 | 5.78E+04 | 3.90E+04 |
| 3.09E+04 | 2.63E+04 | 3.00E+04 | 4.94E+04 | 5.60E+04 | 7.50E+04 | 4.44E+04 | 6.41E+04 | 4.39E+04 |
| 9.00E+00 | 9.00E+00 | 9.00E+00 | 9.61E+04 | 2.27E+05 | 2.88E+05 | 3.17E+04 | 2.40E+05 | 6.46E+04 |
| 7.29E+02 | 6.41E+02 | 5.88E+02 | 7.30E+02 | 2.24E+03 | 2.09E+03 | 4.28E+03 | 1.51E+03 | 2.38E+03 |
| 1.25E+03 | 2.04E+03 | 2.08E+03 | 1.67E+04 | 1.37E+04 | 2.10E+04 | 2.33E+04 | 1.67E+04 | 1.85E+04 |
| 5.01E+03 | 3.44E+03 | 5.13E+03 | 1.06E+04 | 1.21E+04 | 1.31E+04 | 1.21E+04 | 1.22E+04 | 1.32E+04 |
| 4.94E+04 | 4.34E+04 | 4.77E+04 | 2.26E+04 | 2.25E+04 | 2.58E+04 | 3.93E+04 | 1.89E+04 | 2.98E+04 |
| 6.63E+03 | 8.44E+03 | 6.25E+03 | 2.67E+04 | 2.59E+04 | 2.11E+04 | 5.41E+04 | 2.01E+04 | 3.92E+04 |
| 9.00E+00 | 9.00E+00 | 9.00E+00 | 6.22E+03 | 2.86E+03 | 4.84E+03 | 3.15E+03 | 3.21E+03 | 3.05E+03 |
| 4.80E+04 | 3.18E+04 | 3.80E+04 | 1.24E+05 | 1.30E+05 | 1.89E+05 | 6.11E+04 | 1.33E+05 | 1.51E+05 |
| 2.35E+03 | 1.73E+03 | 1.48E+03 | 3.09E+04 | 2.93E+04 | 3.83E+04 | 2.49E+04 | 2.79E+04 | 3.76E+04 |
| 3.40E+05 | 2.73E+05 | 2.76E+05 | 1.60E+06 | 1.60E+06 | 2.20E+06 | 1.13E+06 | 1.81E+06 | 1.70E+06 |
| 2.88E+04 | 1.93E+04 | 2.27E+04 | 6.60E+04 | 7.26E+04 | 8.59E+04 | 3.29E+04 | 5.09E+04 | 8.24E+04 |
| 1.89E+03 | 5.87E+02 | 9.00E+00 | 1.28E+04 | 1.27E+04 | 2.16E+04 | 7.71E+03 | 1.66E+04 | 2.29E+04 |
| 9.00E+00 | 9.00E+00 | 9.00E+00 | 3.37E+04 | 3.98E+04 | 3.75E+04 | 2.48E+04 | 3.36E+04 | 4.36E+04 |
| 9.73E+02 | 9.00E+00 | 9.00E+00 | 2.81E+03 | 2.14E+03 | 3.78E+03 | 1.42E+03 | 3.03E+03 | 4.14E+03 |
| 9.00E+00 | 9.00E+00 | 9.00E+00 | 2.65E+04 | 2.43E+04 | 3.34E+04 | 5.58E+03 | 2.29E+04 | 1.90E+04 |
| 3.12E+04 | 2.97E+04 | 2.97E+04 | 1.19E+05 | 1.21E+05 | 1.32E+05 | 6.83E+04 | 1.18E+05 | 1.08E+05 |
| 6.36E+04 | 4.48E+04 | 4.64E+04 | 8.58E+04 | 9.12E+04 | 6.01E+05 | 5.52E+04 | 1.33E+05 | 9.79E+04 |
| 2.84E+04 | 1.81E+04 | 2.42E+04 | 1.44E+03 | 2.43E+03 | 1.80E+04 | 3.79E+03 | 5.29E+03 | 2.08E+03 |
| 9.00E+00 | 9.00E+00 | 9.00E+00 | 3.32E+03 | 4.80E+03 | 1.57E+04 | 3.22E+03 | 3.49E+03 | 7.56E+03 |
| 9.00E+00 | 9.00E+00 | 1.75E+03 | 6.18E+03 | 4.55E+03 | 8.02E+03 | 2.81E+03 | 5.31E+03 | 5.90E+03 |
| 1.47E+04 | 3.92E+03 | 1.01E+04 | 6.23E+04 | 7.84E+04 | 7.78E+04 | 3.85E+04 | 7.35E+04 | 8.53E+04 |
| 9.00E+00 | 9.00E+00 | 9.00E+00 | 3.28E+03 | 4.20E+03 | 5.13E+03 | 7.44E+02 | 4.47E+03 | 2.05E+03 |
| 1.41E+04 | 1.46E+04 | 1.33E+04 | 4.64E+03 | 9.07E+03 | 6.57E+03 | 8.95E+03 | 3.30E+03 | 4.07E+03 |
| 3.01E+05 | 2.49E+05 | 2.81E+05 | 9.84E+04 | 1.07E+05 | 1.59E+05 | 9.65E+04 | 1.10E+05 | 1.20E+05 |
| 3.92E+05 | 4.44E+05 | 4.46E+05 | 4.97E+05 | 4.70E+05 | 6.17E+05 | 4.97E+05 | 4.94E+05 | 5.07E+05 |
| 3.99E+05 | 4.77E+05 | 4.12E+05 | 4.39E+05 | 4.24E+05 | 5.21E+05 | 4.38E+05 | 4.92E+05 | 4.38E+05 |
| 1.15E+04 | 1.12E+04 | 9.71E+03 | 1.76E+04 | 1.27E+04 | 3.59E+05 | 7.11E+03 | 4.38E+04 | 1.63E+04 |
| 9.00E+00 | 9.00E+00 | 9.00E+00 | 2.19E+04 | 1.01E+04 | 7.10E+05 | 1.07E+04 | 2.08E+04 | 1.77E+04 |
| 7.69E+03 | 8.67E+03 | 9.74E+03 | 4.77E+03 | 5.38E+03 | 4.89E+04 | 3.34E+03 | 3.62E+03 | 4.75E+03 |
| 2.36E+05 | 2.39E+05 | 2.16E+05 | 9.00E+00 | 9.00E+00 | 9.00E+00 | 9.00E+00 | 9.00E+00 | 9.00E+00 |
| 1.12E+05 | 1.02E+05 | 5.87E+04 | 9.00E+00 | 9.00E+00 | 9.00E+00 | 9.00E+00 | 9.00E+00 | 9.00E+00 |
| 1.09E+04 | 2.42E+03 | 1.20E+03 | 5.58E+04 | 4.07E+04 | 4.57E+04 | 4.59E+04 | 6.80E+04 | 3.28E+04 |
| 2.16E+06 | 2.12E+06 | 1.64E+06 | 4.50E+03 | 2.08E+03 | 8.42E+03 | 8.69E+03 | 5.18E+03 | 3.48E+03 |
| 2.72E+05 | 2.93E+05 | 2.76E+05 | 9.00E+00 | 9.00E+00 | 9.00E+00 | 9.00E+00 | 9.00E+00 | 9.00E+00 |
| 4.06E+04 | 6.38E+04 | 3.62E+04 | 1.77E+04 | 3.40E+04 | 3.94E+04 | 1.87E+04 | 5.04E+04 | 2.54E+04 |
| 1.69E+06 | 1.38E+06 | 1.36E+06 | 9.00E+00 | 4.02E+03 | 9.00E+00 | 9.00E+00 | 9.00E+00 | 9.00E+00 |
| 1.80E+05 | 1.81E+05 | 1.54E+05 | 9.00E+00 | 2.23E+03 | 9.00E+00 | 9.00E+00 | 9.00E+00 | 9.00E+00 |
| 4.91E+04 | 5.65E+04 | 4.84E+04 | 3.07E+04 | 2.74E+04 | 4.00E+04 | 3.42E+04 | 2.29E+04 | 2.43E+04 |
| 1.97E+05 | 2.49E+05 | 1.94E+05 | 9.00E+00 | 9.00E+00 | 9.00E+00 | 9.00E+00 | 9.00E+00 | 9.00E+00 |
| 4.55E+03 | 5.06E+03 | 5.12E+03 | 1.18E+04 | 1.11E+04 | 3.59E+04 | 6.93E+03 | 1.75E+04 | 9.75E+03 |
| 5.70E+03 | 6.34E+03 | 5.28E+03 | 7.58E+03 | 7.25E+03 | 1.65E+04 | 9.65E+03 | 1.01E+04 | 8.45E+03 |
| 2.74E+05 | 2.51E+05 | 2.35E+05 | 5.56E+05 | 4.93E+05 | 1.94E+06 | 3.45E+05 | 7.50E+05 | 4.71E+05 |
| 5.13E+03 | 8.91E+03 | 6.56E+03 | 1.18E+04 | 1.24E+04 | 1.86E+04 | 1.19E+04 | 1.46E+04 | 1.06E+04 |
| 1.93E+04 | 1.85E+04 | 1.69E+04 | 3.42E+04 | 2.93E+04 | 6.55E+04 | 2.27E+04 | 4.46E+04 | 3.55E+04 |
| 1.89E+04 | 2.78E+04 | 1.68E+04 | 3.17E+04 | 3.00E+04 | 4.54E+04 | 3.42E+04 | 3.97E+04 | 2.84E+04 |
| 2.57E+05 | 2.21E+05 | 2.66E+05 | 1.79E+04 | 9.36E+04 | 2.58E+04 | 7.98E+04 | 4.05E+04 | 3.00E+04 |
| 3.95E+05 | 4.40E+05 | 3.52E+05 | 9.00E+00 | 5.18E+04 | 1.15E+05 | 9.00E+00 | 9.00E+00 | 9.00E+00 |
| 4.85E+05 | 3.85E+05 | 3.99E+05 | 9.20E+04 | 9.99E+04 | 1.65E+05 | 1.01E+05 | 1.14E+05 | 1.63E+05 |
| 3.73E+06 | 4.70E+06 | 3.32E+06 | 5.17E+04 | 4.13E+04 | 2.60E+05 | 3.50E+04 | 5.55E+04 | 5.01E+04 |
| 3.68E+05 | 4.26E+05 | 3.15E+05 | 1.03E+05 | 7.98E+04 | 1.61E+05 | 1.06E+05 | 8.02E+04 | 3.65E+04 |

|          |          |          |          |          |          |          |          |          |
|----------|----------|----------|----------|----------|----------|----------|----------|----------|
| 3.32E+05 | 2.82E+05 | 2.82E+05 | 3.67E+05 | 4.08E+05 | 4.74E+05 | 3.76E+05 | 5.28E+05 | 5.50E+05 |
| 4.61E+06 | 4.47E+06 | 4.42E+06 | 1.83E+05 | 1.36E+05 | 3.04E+05 | 7.72E+04 | 2.26E+05 | 1.54E+05 |
| 1.94E+04 | 3.50E+04 | 3.10E+04 | 1.00E+05 | 6.61E+04 | 1.37E+05 | 6.29E+03 | 6.99E+04 | 8.61E+04 |
| 2.49E+05 | 8.21E+05 | 7.07E+05 | 1.67E+04 | 9.00E+00 | 9.00E+00 | 9.00E+00 | 9.00E+00 | 2.71E+04 |
| 3.82E+05 | 4.44E+05 | 3.21E+05 | 7.47E+04 | 8.54E+04 | 8.62E+04 | 6.72E+04 | 9.80E+04 | 7.16E+04 |
| 3.55E+05 | 4.42E+05 | 2.98E+05 | 7.12E+04 | 1.34E+05 | 9.52E+04 | 7.53E+04 | 6.87E+04 | 1.09E+05 |
| 2.85E+06 | 3.77E+06 | 2.59E+06 | 4.15E+05 | 3.95E+05 | 7.58E+05 | 3.72E+05 | 5.15E+05 | 3.69E+05 |
| 3.91E+06 | 4.99E+06 | 3.99E+06 | 3.51E+05 | 2.85E+05 | 6.72E+05 | 2.84E+05 | 4.18E+05 | 3.99E+05 |
| 7.89E+05 | 5.80E+05 | 3.59E+05 | 1.50E+05 | 1.95E+05 | 2.81E+05 | 1.22E+05 | 1.61E+05 | 1.42E+05 |
| 1.94E+06 | 1.89E+06 | 1.66E+06 | 9.50E+04 | 4.74E+04 | 2.14E+05 | 7.40E+04 | 7.95E+04 | 8.94E+04 |
| 3.03E+03 | 2.32E+03 | 2.16E+03 | 4.74E+03 | 3.75E+03 | 1.21E+04 | 1.22E+03 | 6.47E+03 | 1.93E+03 |
| 6.32E+05 | 3.71E+05 | 4.31E+05 | 1.32E+05 | 1.51E+05 | 1.54E+05 | 1.54E+05 | 1.46E+05 | 2.04E+05 |
| 9.00E+00 | 9.00E+00 | 9.00E+00 | 8.96E+04 | 8.94E+04 | 6.68E+04 | 1.37E+05 | 7.61E+04 | 5.68E+04 |
| 4.19E+05 | 4.01E+05 | 3.25E+05 | 9.00E+00 | 9.00E+00 | 1.15E+05 | 9.00E+00 | 9.00E+00 | 9.00E+00 |
| 9.00E+00 | 7.97E+04 | 9.00E+00 |
| 2.32E+04 | 3.90E+04 | 1.84E+04 | 1.46E+04 | 1.60E+04 | 1.59E+04 | 1.05E+04 | 1.94E+04 | 1.09E+04 |
| 3.41E+03 | 1.43E+03 | 1.33E+03 | 8.33E+04 | 6.24E+04 | 6.46E+04 | 1.84E+05 | 1.16E+05 | 1.74E+05 |
| 3.79E+05 | 4.99E+05 | 3.16E+05 | 9.95E+04 | 9.65E+04 | 3.23E+05 | 9.44E+04 | 1.27E+05 | 7.81E+04 |
| 5.95E+06 | 7.33E+06 | 5.16E+06 | 5.71E+05 | 5.60E+05 | 1.65E+06 | 7.33E+05 | 6.71E+05 | 4.55E+05 |
| 4.04E+04 | 9.00E+00 |
| 7.01E+06 | 9.38E+06 | 6.38E+06 | 1.65E+05 | 1.53E+05 | 3.64E+05 | 2.07E+05 | 1.47E+05 | 1.22E+05 |
| 5.05E+06 | 5.86E+06 | 4.61E+06 | 1.20E+05 | 1.17E+05 | 2.44E+05 | 1.09E+05 | 1.22E+05 | 9.47E+04 |
| 3.61E+05 | 3.72E+05 | 2.84E+05 | 3.39E+04 | 4.52E+04 | 7.17E+05 | 2.99E+04 | 3.12E+04 | 3.17E+04 |
| 6.66E+05 | 7.18E+05 | 4.66E+05 | 9.00E+00 | 9.00E+00 | 9.00E+00 | 9.00E+00 | 9.00E+00 | 9.00E+00 |
| 6.22E+06 | 8.48E+06 | 5.47E+06 | 7.38E+05 | 6.43E+05 | 1.90E+06 | 6.66E+05 | 6.58E+05 | 6.29E+05 |
| 6.93E+04 | 6.20E+04 | 4.59E+04 | 9.00E+00 | 8.23E+02 | 9.00E+00 | 1.63E+03 | 9.00E+00 | 9.00E+00 |
| 5.93E+06 | 6.83E+06 | 4.34E+06 | 1.37E+05 | 1.22E+05 | 2.32E+05 | 1.41E+05 | 1.87E+05 | 1.37E+05 |
| 9.00E+00 | 9.00E+00 | 9.00E+00 | 5.43E+04 | 4.91E+04 | 1.09E+05 | 6.59E+04 | 5.89E+04 | 7.54E+04 |
| 3.05E+04 | 4.32E+04 | 4.91E+04 | 3.21E+04 | 2.94E+04 | 8.07E+04 | 2.91E+04 | 3.35E+04 | 1.27E+04 |
| 4.39E+05 | 3.59E+05 | 3.04E+05 | 7.67E+05 | 5.82E+05 | 9.21E+05 | 1.50E+06 | 7.79E+05 | 7.34E+05 |
| 2.62E+04 | 1.64E+04 | 2.41E+04 | 1.84E+05 | 1.33E+05 | 1.99E+05 | 1.30E+05 | 1.22E+05 | 1.29E+05 |
| 6.26E+05 | 6.14E+05 | 5.77E+05 | 2.24E+05 | 1.85E+05 | 2.59E+05 | 1.23E+05 | 1.50E+05 | 2.02E+05 |
| 1.62E+04 | 2.13E+04 | 1.40E+04 | 2.91E+03 | 2.24E+03 | 6.10E+03 | 1.98E+03 | 2.06E+03 | 1.46E+03 |
| 3.43E+04 | 2.62E+04 | 1.91E+04 | 2.50E+03 | 1.23E+03 | 6.79E+03 | 1.50E+03 | 3.41E+03 | 1.94E+03 |
| 7.68E+03 | 1.58E+04 | 5.86E+03 | 9.00E+00 | 9.00E+00 | 9.00E+00 | 9.00E+00 | 9.00E+00 | 9.00E+00 |
| 6.78E+04 | 8.28E+04 | 6.75E+04 | 1.69E+04 | 1.74E+04 | 4.65E+04 | 1.66E+04 | 2.27E+04 | 1.39E+04 |
| 6.48E+04 | 5.40E+04 | 3.26E+04 | 1.07E+04 | 8.88E+03 | 6.75E+03 | 1.22E+04 | 1.95E+04 | 8.11E+03 |
| 6.46E+05 | 5.90E+05 | 6.70E+05 | 8.72E+05 | 7.17E+05 | 9.21E+05 | 6.74E+05 | 6.31E+05 | 6.54E+05 |
| 5.73E+03 | 6.50E+03 | 4.47E+03 | 1.36E+04 | 1.33E+04 | 3.55E+04 | 5.50E+03 | 1.60E+04 | 1.12E+04 |
| 1.18E+06 | 1.07E+06 | 1.10E+06 | 3.76E+04 | 4.15E+04 | 9.14E+04 | 2.21E+04 | 5.56E+04 | 6.43E+04 |
| 4.53E+03 | 1.34E+04 | 5.37E+03 | 1.55E+04 | 1.43E+04 | 2.93E+04 | 1.71E+04 | 1.80E+04 | 1.66E+04 |
| 8.95E+03 | 1.32E+04 | 1.08E+04 | 1.27E+04 | 1.29E+04 | 1.83E+04 | 1.26E+04 | 1.50E+04 | 1.16E+04 |
| 9.76E+04 | 1.21E+05 | 1.09E+05 | 1.61E+05 | 1.44E+05 | 1.62E+05 | 1.52E+05 | 1.71E+05 | 1.55E+05 |
| 6.60E+04 | 9.98E+04 | 7.12E+04 | 2.68E+06 | 2.27E+06 | 2.84E+06 | 7.27E+05 | 2.30E+06 | 1.25E+06 |
| 5.01E+03 | 6.56E+03 | 6.77E+03 | 9.93E+04 | 1.00E+05 | 1.16E+05 | 7.48E+03 | 9.03E+04 | 5.69E+04 |
| 9.95E+04 | 1.39E+05 | 9.76E+04 | 3.16E+06 | 2.66E+06 | 3.14E+06 | 1.16E+06 | 3.08E+06 | 1.72E+06 |
| 1.33E+05 | 2.24E+05 | 1.33E+05 | 1.17E+06 | 1.18E+06 | 2.56E+06 | 6.14E+05 | 2.10E+06 | 1.51E+06 |
| 4.24E+05 | 5.45E+05 | 4.22E+05 | 3.07E+05 | 2.43E+05 | 2.86E+05 | 1.92E+05 | 2.00E+05 | 2.52E+05 |
| 1.71E+04 | 1.21E+04 | 7.39E+03 | 3.46E+04 | 2.74E+04 | 2.88E+04 | 2.62E+04 | 1.75E+04 | 3.44E+04 |
| 3.19E+04 | 1.55E+04 | 1.16E+04 | 8.63E+03 | 1.81E+04 | 2.07E+04 | 2.36E+03 | 1.27E+04 | 9.02E+03 |
| 1.23E+04 | 2.14E+04 | 1.58E+04 | 6.72E+04 | 6.13E+04 | 6.77E+04 | 3.09E+04 | 3.69E+04 | 5.07E+04 |
| 1.44E+06 | 1.42E+06 | 1.17E+06 | 9.33E+05 | 8.54E+05 | 1.25E+06 | 1.01E+06 | 1.19E+06 | 9.87E+05 |
| 1.57E+05 | 9.00E+00 | 2.64E+05 | 2.75E+06 | 2.99E+06 | 2.75E+06 | 1.65E+06 | 2.17E+06 | 2.93E+06 |
| 2.02E+05 | 2.18E+05 | 1.75E+05 | 1.36E+05 | 1.18E+05 | 3.16E+05 | 2.11E+05 | 1.35E+05 | 2.21E+05 |

|          |          |          |          |          |          |          |          |          |
|----------|----------|----------|----------|----------|----------|----------|----------|----------|
| 1.02E+06 | 1.40E+06 | 1.16E+06 | 1.14E+07 | 8.41E+06 | 8.64E+06 | 6.30E+06 | 6.81E+06 | 1.05E+07 |
| 3.77E+04 | 4.45E+04 | 1.79E+04 | 8.63E+05 | 6.71E+05 | 6.35E+05 | 4.62E+05 | 4.58E+05 | 6.50E+05 |
| 2.76E+04 | 2.13E+04 | 1.27E+04 | 1.26E+05 | 9.20E+04 | 8.75E+04 | 7.58E+04 | 4.82E+04 | 1.09E+05 |
| 6.47E+03 | 1.25E+04 | 9.29E+03 | 1.22E+04 | 1.49E+04 | 1.27E+04 | 9.81E+03 | 3.10E+04 | 1.22E+04 |
| 1.60E+05 | 2.31E+05 | 1.57E+05 | 9.28E+05 | 1.11E+06 | 8.00E+05 | 1.28E+06 | 1.43E+06 | 1.21E+06 |
| 9.00E+00 | 9.00E+00 | 9.00E+00 | 2.32E+05 | 2.85E+05 | 9.37E+04 | 3.68E+05 | 4.47E+05 | 2.33E+05 |
| 9.47E+03 | 2.11E+04 | 1.39E+04 | 5.97E+04 | 9.60E+04 | 5.35E+04 | 1.31E+05 | 1.17E+05 | 9.43E+04 |
| 9.00E+00 | 2.66E+03 | 9.00E+00 | 9.00E+04 | 6.76E+04 | 6.49E+04 | 7.64E+04 | 1.17E+05 | 8.64E+04 |
| 1.35E+04 | 1.03E+04 | 1.41E+04 | 7.35E+04 | 8.40E+04 | 9.32E+04 | 7.00E+04 | 1.16E+05 | 7.51E+04 |
| 1.27E+04 | 1.23E+04 | 1.27E+04 | 2.59E+05 | 2.30E+05 | 1.90E+05 | 3.43E+05 | 2.37E+05 | 3.13E+05 |
| 4.58E+07 | 5.44E+07 | 4.30E+07 | 1.48E+07 | 1.50E+07 | 1.88E+07 | 1.48E+07 | 1.31E+07 | 1.71E+07 |
| 5.62E+05 | 5.93E+05 | 4.63E+05 | 1.34E+06 | 1.51E+06 | 1.42E+06 | 3.68E+05 | 1.08E+06 | 1.24E+06 |
| 5.07E+03 | 5.42E+03 | 7.85E+03 | 5.06E+04 | 9.98E+04 | 7.18E+04 | 9.06E+04 | 4.28E+04 | 1.23E+05 |
| 9.77E+05 | 1.19E+06 | 8.08E+05 | 3.72E+05 | 2.93E+05 | 5.42E+05 | 2.94E+05 | 4.40E+05 | 2.56E+05 |
| 9.65E+04 | 9.93E+04 | 7.63E+04 | 7.41E+04 | 5.59E+04 | 6.13E+04 | 4.33E+04 | 5.23E+04 | 9.97E+04 |
| 9.92E+05 | 8.91E+05 | 8.66E+05 | 1.51E+07 | 1.28E+07 | 1.16E+07 | 1.29E+07 | 1.04E+07 | 1.95E+07 |
| 9.00E+00 | 9.00E+00 | 9.00E+00 | 1.15E+06 | 8.02E+05 | 7.95E+05 | 4.65E+05 | 4.26E+05 | 8.65E+05 |
| 2.16E+05 | 2.59E+05 | 1.95E+05 | 1.51E+06 | 1.46E+06 | 1.48E+06 | 4.82E+05 | 1.48E+06 | 1.24E+06 |
| 2.08E+04 | 3.25E+04 | 2.09E+04 | 3.23E+05 | 2.71E+05 | 2.54E+05 | 2.15E+05 | 2.55E+05 | 2.64E+05 |
| 5.34E+06 | 5.08E+06 | 3.98E+06 | 9.00E+00 | 9.00E+00 | 6.65E+05 | 9.00E+00 | 9.00E+00 | 9.00E+00 |
| 2.48E+05 | 3.20E+05 | 2.38E+05 | 1.61E+06 | 8.76E+05 | 1.56E+06 | 2.38E+06 | 1.74E+06 | 8.09E+05 |
| 3.24E+05 | 3.92E+05 | 2.41E+05 | 5.81E+05 | 5.63E+05 | 7.44E+05 | 2.98E+05 | 5.56E+05 | 5.61E+05 |
| 3.87E+05 | 3.82E+05 | 3.81E+05 | 3.90E+05 | 4.66E+05 | 4.70E+05 | 4.54E+05 | 4.67E+05 | 3.92E+05 |
| 1.72E+06 | 1.61E+06 | 1.53E+06 | 7.81E+04 | 5.30E+04 | 1.86E+05 | 8.72E+04 | 9.21E+04 | 6.73E+04 |
| 9.14E+05 | 1.00E+06 | 9.19E+05 | 1.52E+07 | 1.22E+07 | 9.35E+06 | 1.67E+07 | 9.32E+06 | 1.48E+07 |
| 6.61E+05 | 7.23E+05 | 4.77E+05 | 2.13E+05 | 2.14E+05 | 3.73E+05 | 1.36E+05 | 1.95E+05 | 2.87E+05 |
| 7.65E+07 | 7.73E+07 | 6.74E+07 | 1.36E+07 | 1.42E+07 | 1.78E+07 | 1.15E+07 | 1.46E+07 | 1.59E+07 |
| 3.87E+06 | 4.16E+06 | 3.38E+06 | 1.08E+06 | 1.31E+06 | 1.36E+06 | 2.89E+05 | 1.19E+06 | 9.97E+05 |
| 5.71E+05 | 7.01E+05 | 8.59E+05 | 3.55E+05 | 3.40E+05 | 3.38E+05 | 3.80E+05 | 3.10E+05 | 2.01E+05 |
| 6.67E+06 | 8.30E+06 | 5.48E+06 | 1.16E+07 | 1.18E+07 | 8.60E+06 | 5.75E+06 | 8.41E+06 | 8.18E+06 |
| 4.35E+08 | 4.78E+08 | 4.35E+08 | 1.05E+08 | 9.88E+07 | 1.15E+08 | 9.35E+07 | 1.10E+08 | 1.06E+08 |
| 2.89E+07 | 3.24E+07 | 2.85E+07 | 1.18E+07 | 1.06E+07 | 1.30E+07 | 6.82E+06 | 1.26E+07 | 1.15E+07 |
| 3.13E+06 | 3.37E+06 | 2.86E+06 | 2.09E+07 | 1.78E+07 | 1.99E+07 | 1.82E+07 | 2.21E+07 | 2.07E+07 |
| 5.30E+06 | 6.40E+06 | 4.88E+06 | 8.02E+07 | 6.18E+07 | 6.45E+07 | 3.26E+07 | 7.09E+07 | 6.92E+07 |
| 4.53E+06 | 5.62E+06 | 5.14E+06 | 4.52E+05 | 4.25E+05 | 6.20E+05 | 3.66E+05 | 2.14E+05 | 3.77E+05 |
| 6.39E+05 | 8.19E+05 | 6.72E+05 | 6.39E+05 | 5.57E+05 | 8.57E+05 | 5.47E+05 | 5.32E+05 | 5.27E+05 |
| 2.91E+06 | 2.84E+06 | 2.80E+06 | 3.22E+06 | 3.30E+06 | 4.19E+06 | 1.58E+06 | 2.39E+06 | 2.06E+06 |
| 1.07E+07 | 1.19E+07 | 1.15E+07 | 1.69E+07 | 1.83E+07 | 1.62E+07 | 1.62E+07 | 1.50E+07 | 1.81E+07 |
| 6.40E+05 | 1.66E+06 | 4.31E+05 | 1.95E+07 | 1.83E+07 | 2.03E+07 | 6.58E+06 | 1.35E+07 | 1.38E+07 |
| 9.45E+04 | 1.19E+05 | 8.85E+04 | 2.44E+04 | 2.22E+04 | 2.79E+04 | 1.72E+04 | 2.47E+04 | 1.18E+04 |
| 1.96E+05 | 2.26E+05 | 1.57E+05 | 5.98E+04 | 4.73E+04 | 6.10E+04 | 4.75E+04 | 7.34E+04 | 3.20E+04 |
| 3.38E+06 | 3.79E+06 | 3.53E+06 | 3.44E+06 | 3.62E+06 | 3.10E+06 | 3.91E+06 | 3.23E+06 | 3.94E+06 |
| 7.60E+06 | 8.26E+06 | 7.93E+06 | 1.25E+07 | 1.15E+07 | 1.20E+07 | 1.33E+07 | 1.21E+07 | 1.07E+07 |
| 8.68E+05 | 1.03E+06 | 6.37E+05 | 2.52E+05 | 2.80E+05 | 3.47E+05 | 2.27E+05 | 2.38E+05 | 1.93E+05 |
| 7.64E+03 | 6.30E+03 | 6.37E+03 | 3.74E+03 | 3.48E+03 | 5.30E+03 | 2.97E+03 | 4.39E+03 | 3.15E+03 |
| 1.03E+05 | 5.96E+04 | 9.07E+04 | 1.84E+05 | 2.45E+05 | 1.98E+05 | 1.20E+04 | 1.84E+05 | 1.88E+05 |
| 1.44E+05 | 1.78E+05 | 1.28E+05 | 5.40E+05 | 2.59E+05 | 3.20E+05 | 2.20E+05 | 3.62E+05 | 3.16E+05 |
| 5.48E+05 | 6.00E+05 | 6.22E+05 | 8.20E+05 | 8.04E+05 | 7.45E+05 | 2.17E+05 | 7.34E+05 | 8.83E+05 |
| 4.55E+04 | 5.42E+04 | 2.82E+04 | 4.32E+06 | 4.17E+06 | 3.09E+06 | 1.76E+06 | 4.39E+06 | 4.67E+06 |
| 9.00E+00 | 1.94E+03 | 9.00E+00 | 1.00E+05 | 8.78E+04 | 7.63E+04 | 2.62E+04 | 8.28E+04 | 8.58E+04 |
| 7.50E+03 | 1.10E+04 | 4.24E+03 | 8.77E+04 | 9.87E+04 | 4.97E+04 | 3.05E+04 | 7.96E+04 | 9.82E+04 |
| 8.17E+06 | 6.99E+06 | 6.44E+06 | 5.70E+07 | 4.96E+07 | 3.64E+07 | 9.28E+06 | 3.71E+07 | 4.60E+07 |
| 3.51E+05 | 3.80E+05 | 3.61E+05 | 6.65E+05 | 5.67E+05 | 5.37E+05 | 1.00E+06 | 6.42E+05 | 7.00E+05 |
| 1.54E+05 | 1.34E+05 | 1.29E+05 | 4.68E+04 | 7.29E+04 | 6.51E+04 | 1.44E+04 | 4.96E+04 | 4.28E+04 |

|          |          |          |          |          |          |          |          |          |
|----------|----------|----------|----------|----------|----------|----------|----------|----------|
| 1.43E+06 | 1.35E+06 | 1.23E+06 | 1.06E+06 | 1.09E+06 | 8.41E+05 | 7.98E+05 | 7.46E+05 | 8.77E+05 |
| 6.44E+04 | 1.01E+05 | 6.64E+04 | 2.44E+06 | 2.11E+06 | 2.39E+06 | 1.32E+06 | 2.72E+06 | 2.73E+06 |
| 9.00E+00 | 8.59E+04 | 9.00E+00 | 3.14E+05 | 3.28E+05 | 3.87E+05 | 2.68E+04 | 2.85E+05 | 2.41E+05 |
| 9.00E+00 | 6.74E+03 | 9.00E+00 | 1.49E+05 | 1.04E+05 | 1.25E+05 | 4.22E+04 | 5.83E+04 | 8.72E+04 |
| 1.24E+05 | 9.00E+00 | 9.00E+00 | 9.00E+00 | 9.00E+00 | 9.00E+00 | 9.00E+00 | 1.92E+05 | 2.99E+05 |
| 2.66E+05 | 3.02E+05 | 3.06E+05 | 1.44E+07 | 1.43E+07 | 1.12E+07 | 1.08E+07 | 1.42E+07 | 1.78E+07 |
| 1.21E+06 | 1.34E+06 | 1.26E+06 | 1.11E+07 | 1.13E+07 | 8.64E+06 | 8.53E+06 | 8.65E+06 | 1.12E+07 |
| 1.25E+05 | 1.27E+05 | 1.02E+05 | 3.33E+04 | 3.34E+04 | 4.61E+04 | 2.55E+04 | 3.83E+04 | 3.85E+04 |
| 1.05E+08 | 1.13E+08 | 9.09E+07 | 6.00E+07 | 5.69E+07 | 6.12E+07 | 5.11E+07 | 6.83E+07 | 4.27E+07 |
| 4.16E+05 | 4.78E+05 | 3.92E+05 | 4.88E+05 | 4.89E+05 | 4.62E+05 | 5.45E+05 | 5.92E+05 | 6.36E+05 |
| 1.71E+07 | 1.96E+07 | 1.82E+07 | 4.25E+06 | 3.64E+06 | 4.95E+06 | 2.70E+06 | 5.39E+06 | 4.08E+06 |
| 1.68E+06 | 1.22E+06 | 8.70E+05 | 1.44E+07 | 1.76E+07 | 1.20E+07 | 1.51E+07 | 1.81E+07 | 1.98E+07 |
| 6.43E+06 | 7.08E+06 | 5.27E+06 | 4.92E+07 | 4.78E+07 | 5.90E+07 | 3.70E+07 | 4.83E+07 | 4.23E+07 |
| 1.12E+06 | 9.93E+05 | 8.75E+05 | 1.21E+07 | 1.12E+07 | 1.15E+07 | 6.99E+06 | 1.14E+07 | 8.68E+06 |
| 1.01E+07 | 1.02E+07 | 9.91E+06 | 1.35E+07 | 1.32E+07 | 1.26E+07 | 1.47E+07 | 1.39E+07 | 1.36E+07 |
| 4.42E+04 | 5.03E+04 | 3.11E+04 | 9.91E+03 | 7.95E+03 | 1.06E+04 | 7.45E+03 | 1.09E+04 | 7.58E+03 |
| 1.41E+06 | 1.71E+06 | 1.45E+06 | 5.11E+05 | 4.13E+05 | 6.89E+05 | 5.68E+05 | 4.48E+05 | 4.54E+05 |
| 1.11E+05 | 1.18E+05 | 3.72E+04 | 8.84E+05 | 7.75E+05 | 3.66E+05 | 6.76E+05 | 8.66E+05 | 5.96E+05 |
| 4.14E+06 | 4.58E+06 | 3.40E+06 | 1.38E+07 | 1.35E+07 | 1.20E+07 | 1.71E+07 | 1.43E+07 | 1.43E+07 |
| 7.34E+05 | 7.87E+05 | 5.95E+05 | 5.60E+05 | 5.05E+05 | 1.12E+06 | 4.27E+05 | 4.58E+05 | 5.31E+05 |
| 7.06E+04 | 7.46E+04 | 6.51E+04 | 9.00E+00 | 1.36E+04 | 2.17E+04 | 9.00E+00 | 9.00E+00 | 9.00E+00 |
| 1.16E+07 | 1.18E+07 | 1.24E+07 | 4.56E+06 | 3.76E+06 | 5.54E+06 | 2.88E+06 | 5.14E+06 | 5.62E+06 |
| 1.86E+05 | 2.43E+05 | 1.97E+05 | 8.85E+06 | 9.35E+06 | 6.64E+06 | 6.89E+06 | 1.27E+07 | 1.17E+07 |
| 5.49E+05 | 4.34E+05 | 4.24E+05 | 1.87E+05 | 1.64E+05 | 2.46E+05 | 1.05E+05 | 2.02E+05 | 2.23E+05 |
| 9.00E+00 | 9.00E+00 | 9.00E+00 | 2.13E+05 | 2.17E+05 | 1.48E+05 | 1.76E+05 | 1.81E+05 | 2.07E+05 |
| 2.41E+05 | 2.24E+05 | 1.72E+05 | 1.21E+04 | 9.16E+03 | 1.58E+04 | 8.89E+03 | 8.96E+03 | 1.04E+04 |
| 1.30E+06 | 1.29E+06 | 1.14E+06 | 2.38E+05 | 2.01E+05 | 2.94E+05 | 1.24E+05 | 2.20E+05 | 2.49E+05 |
| 3.17E+06 | 3.11E+06 | 3.38E+06 | 3.64E+06 | 3.80E+06 | 2.85E+06 | 3.97E+06 | 3.38E+06 | 4.38E+06 |
| 1.48E+04 | 4.11E+04 | 1.29E+04 | 5.14E+05 | 4.30E+05 | 3.83E+05 | 1.88E+05 | 2.97E+05 | 3.73E+05 |
| 9.46E+05 | 9.06E+05 | 7.29E+05 | 1.89E+04 | 1.34E+04 | 2.39E+04 | 1.31E+04 | 1.67E+04 | 7.64E+03 |
| 4.50E+05 | 4.54E+05 | 3.49E+05 | 3.21E+04 | 2.52E+04 | 9.00E+00 | 9.00E+00 | 9.00E+00 | 9.00E+00 |
| 1.27E+05 | 5.58E+04 | 1.08E+05 | 1.57E+05 | 1.05E+05 | 8.35E+04 | 2.25E+05 | 1.30E+05 | 1.30E+05 |
| 1.53E+06 | 1.33E+06 | 1.51E+06 | 2.68E+06 | 2.26E+06 | 1.55E+06 | 2.62E+06 | 2.12E+06 | 2.02E+06 |
| 2.77E+05 | 3.45E+05 | 2.41E+05 | 3.95E+05 | 2.40E+05 | 1.27E+06 | 3.37E+05 | 3.08E+05 | 2.42E+05 |
| 1.02E+05 | 1.10E+05 | 7.71E+04 | 7.91E+06 | 7.78E+06 | 6.76E+06 | 1.27E+07 | 1.01E+07 | 9.03E+06 |
| 9.00E+00 | 9.00E+00 | 9.00E+00 | 6.51E+05 | 4.27E+05 | 3.16E+05 | 9.28E+05 | 4.75E+05 | 5.94E+05 |
| 9.00E+00 | 8.86E+03 | 9.00E+00 | 4.87E+05 | 4.23E+05 | 3.10E+05 | 5.85E+05 | 5.28E+05 | 4.83E+05 |
| 4.91E+04 | 4.17E+04 | 3.29E+04 | 3.66E+05 | 2.69E+05 | 2.89E+05 | 2.40E+05 | 3.21E+05 | 3.26E+05 |
| 1.39E+04 | 1.19E+04 | 9.00E+00 | 4.69E+05 | 4.15E+05 | 4.02E+05 | 3.21E+05 | 4.04E+05 | 3.67E+05 |
| 2.87E+05 | 3.69E+05 | 3.34E+05 | 3.07E+06 | 3.06E+06 | 2.62E+06 | 3.83E+06 | 2.94E+06 | 2.97E+06 |
| 5.38E+03 | 9.00E+00 | 1.00E+03 | 3.41E+05 | 2.57E+05 | 2.51E+05 | 1.26E+05 | 2.30E+05 | 2.09E+05 |
| 2.20E+04 | 8.16E+03 | 1.03E+04 | 6.68E+04 | 5.08E+04 | 7.56E+04 | 6.63E+04 | 7.09E+04 | 1.93E+04 |
| 9.00E+00 | 9.00E+00 | 9.00E+00 | 2.06E+05 | 8.95E+04 | 1.67E+05 | 7.48E+04 | 8.78E+04 | 1.61E+05 |
| 1.38E+05 | 1.36E+05 | 1.22E+05 | 2.14E+06 | 2.37E+06 | 1.65E+06 | 2.11E+06 | 2.11E+06 | 1.68E+06 |
| 7.64E+03 | 1.11E+04 | 1.10E+04 | 3.07E+05 | 2.37E+05 | 1.91E+05 | 2.43E+05 | 2.60E+05 | 3.16E+05 |
| 9.69E+06 | 1.06E+07 | 7.59E+06 | 7.04E+06 | 6.41E+06 | 5.86E+06 | 5.13E+06 | 6.63E+06 | 6.69E+06 |
| 8.66E+05 | 9.47E+05 | 6.69E+05 | 3.35E+07 | 3.54E+07 | 2.38E+07 | 3.45E+07 | 3.41E+07 | 3.25E+07 |
| 2.94E+06 | 3.11E+06 | 2.78E+06 | 2.26E+07 | 2.06E+07 | 1.26E+07 | 2.94E+07 | 2.03E+07 | 2.27E+07 |
| 3.92E+04 | 2.78E+04 | 3.12E+04 | 8.68E+04 | 8.49E+04 | 7.36E+04 | 1.03E+05 | 5.87E+04 | 1.03E+05 |
| 1.53E+06 | 1.74E+06 | 1.27E+06 | 3.14E+06 | 2.13E+06 | 2.43E+06 | 1.58E+06 | 2.20E+06 | 2.23E+06 |
| 4.24E+04 | 3.44E+04 | 3.21E+04 | 8.55E+05 | 7.95E+05 | 7.46E+05 | 4.39E+05 | 8.43E+05 | 1.11E+06 |
| 1.62E+04 | 1.82E+04 | 1.40E+04 | 8.60E+04 | 8.77E+04 | 9.09E+04 | 1.49E+04 | 7.35E+04 | 1.07E+05 |
| 1.40E+05 | 1.50E+05 | 1.17E+05 | 1.74E+05 | 1.34E+05 | 1.30E+05 | 8.35E+04 | 1.33E+05 | 1.90E+05 |
| 6.82E+06 | 7.31E+06 | 6.72E+06 | 1.16E+07 | 1.11E+07 | 8.83E+06 | 6.63E+06 | 8.87E+06 | 1.10E+07 |

|          |          |          |          |          |          |          |          |          |
|----------|----------|----------|----------|----------|----------|----------|----------|----------|
| 7.86E+04 | 8.13E+04 | 9.81E+04 | 3.65E+05 | 3.98E+05 | 4.21E+05 | 2.93E+05 | 3.38E+05 | 4.27E+05 |
| 7.57E+04 | 3.99E+04 | 9.39E+04 | 1.26E+05 | 1.23E+05 | 9.90E+04 | 1.31E+05 | 1.12E+05 | 1.40E+05 |
| 5.44E+06 | 6.13E+06 | 5.36E+06 | 9.07E+06 | 8.34E+06 | 7.28E+06 | 9.93E+06 | 8.17E+06 | 1.22E+07 |
| 1.91E+05 | 1.91E+05 | 1.87E+05 | 1.63E+06 | 1.64E+06 | 1.36E+06 | 2.32E+05 | 1.48E+06 | 1.54E+06 |
| 5.60E+04 | 4.76E+04 | 5.23E+04 | 1.02E+05 | 1.02E+05 | 9.24E+04 | 5.70E+04 | 8.57E+04 | 8.95E+04 |
| 5.39E+06 | 6.05E+06 | 5.17E+06 | 7.27E+05 | 6.92E+05 | 1.11E+06 | 7.67E+05 | 9.29E+05 | 8.44E+05 |
| 1.26E+05 | 3.39E+05 | 3.49E+05 | 1.03E+06 | 1.37E+06 | 8.64E+05 | 3.73E+05 | 9.65E+05 | 1.37E+06 |
| 2.21E+07 | 2.13E+07 | 2.20E+07 | 8.09E+07 | 8.19E+07 | 5.91E+07 | 1.06E+08 | 7.29E+07 | 9.06E+07 |
| 2.77E+05 | 3.02E+05 | 3.03E+05 | 6.14E+05 | 5.45E+05 | 4.31E+05 | 4.75E+05 | 5.25E+05 | 4.77E+05 |
| 1.12E+04 | 1.30E+04 | 1.49E+04 | 8.16E+04 | 5.68E+04 | 5.08E+04 | 8.46E+04 | 5.85E+04 | 5.79E+04 |
| 8.14E+05 | 8.97E+05 | 7.85E+05 | 6.83E+05 | 5.97E+05 | 5.47E+05 | 5.47E+05 | 5.06E+05 | 5.43E+05 |
| 1.18E+04 | 5.51E+04 | 2.46E+04 | 8.19E+05 | 6.19E+05 | 7.50E+05 | 3.47E+05 | 6.90E+05 | 5.82E+05 |
| 1.63E+06 | 1.84E+06 | 1.63E+06 | 4.14E+05 | 3.00E+05 | 6.54E+05 | 3.54E+05 | 3.36E+05 | 3.85E+05 |
| 1.51E+05 | 1.46E+05 | 1.42E+05 | 6.89E+04 | 7.67E+04 | 9.23E+04 | 6.53E+04 | 6.04E+04 | 7.82E+04 |
| 1.43E+07 | 1.69E+07 | 1.48E+07 | 3.94E+07 | 3.64E+07 | 2.69E+07 | 7.12E+07 | 3.31E+07 | 3.65E+07 |
| 1.03E+05 | 9.54E+04 | 8.94E+04 | 3.51E+03 | 3.77E+03 | 6.24E+03 | 1.57E+03 | 3.59E+03 | 1.26E+03 |
| 6.60E+05 | 6.63E+05 | 5.08E+05 | 1.76E+04 | 1.21E+04 | 4.04E+04 | 1.11E+04 | 1.42E+04 | 7.43E+03 |
| 3.83E+04 | 3.70E+04 | 3.10E+04 | 4.02E+04 | 4.40E+04 | 1.10E+05 | 3.79E+04 | 3.95E+04 | 3.35E+04 |
| 1.15E+06 | 1.19E+06 | 8.61E+05 | 2.71E+05 | 3.81E+05 | 9.60E+05 | 3.81E+05 | 4.23E+05 | 4.77E+05 |
| 2.02E+05 | 2.45E+05 | 1.63E+05 | 6.88E+05 | 8.58E+05 | 6.99E+05 | 6.11E+05 | 5.83E+05 | 5.80E+05 |
| 3.09E+05 | 4.33E+05 | 2.57E+05 | 2.68E+05 | 3.29E+05 | 3.15E+05 | 1.94E+05 | 2.12E+05 | 1.66E+05 |
| 1.20E+05 | 9.60E+04 | 1.03E+05 | 4.89E+06 | 5.32E+06 | 4.45E+06 | 6.65E+06 | 4.74E+06 | 4.56E+06 |
| 8.74E+06 | 1.03E+07 | 8.85E+06 | 3.85E+06 | 4.63E+06 | 4.11E+06 | 2.59E+06 | 3.69E+06 | 3.28E+06 |
| 3.08E+06 | 2.94E+06 | 2.63E+06 | 2.65E+06 | 2.59E+06 | 2.91E+06 | 6.12E+06 | 3.00E+06 | 2.42E+06 |
| 3.60E+06 | 3.68E+06 | 3.25E+06 | 7.31E+06 | 9.47E+06 | 8.41E+06 | 7.90E+06 | 8.18E+06 | 1.30E+06 |
| 1.77E+07 | 1.73E+07 | 1.54E+07 | 2.36E+07 | 3.30E+07 | 2.70E+07 | 2.81E+07 | 3.05E+07 | 2.46E+07 |
| 5.72E+05 | 7.28E+05 | 5.18E+05 | 8.43E+05 | 8.58E+05 | 7.66E+05 | 9.89E+05 | 8.08E+05 | 7.04E+05 |
| 6.48E+04 | 9.09E+04 | 7.79E+04 | 2.06E+05 | 2.69E+05 | 1.97E+05 | 1.43E+05 | 1.53E+05 | 1.87E+05 |
| 1.97E+06 | 1.29E+06 | 1.17E+06 | 1.65E+06 | 2.15E+06 | 9.70E+06 | 1.69E+06 | 1.57E+06 | 1.38E+06 |
| 1.38E+07 | 1.30E+07 | 1.31E+07 | 1.08E+07 | 1.18E+07 | 4.04E+07 | 1.15E+07 | 1.02E+07 | 1.23E+07 |
| 2.54E+05 | 3.50E+05 | 2.04E+05 | 5.12E+05 | 5.74E+05 | 1.78E+06 | 3.99E+05 | 5.17E+05 | 5.48E+05 |
| 1.67E+07 | 1.51E+07 | 1.44E+07 | 3.55E+06 | 4.43E+06 | 6.69E+06 | 4.04E+06 | 3.38E+06 | 3.63E+06 |
| 1.56E+07 | 2.06E+07 | 1.54E+07 | 3.22E+06 | 3.43E+06 | 3.23E+06 | 2.54E+06 | 3.24E+06 | 2.26E+06 |
| 9.00E+00 | 6.47E+04 | 9.19E+04 | 3.90E+05 | 3.19E+05 | 2.91E+05 | 2.24E+05 | 3.19E+05 | 2.29E+05 |
| 5.72E+06 | 6.42E+06 | 5.38E+06 | 7.16E+06 | 7.93E+06 | 6.87E+06 | 7.74E+06 | 7.02E+06 | 5.65E+06 |
| 1.84E+08 | 1.93E+08 | 1.77E+08 | 3.32E+07 | 3.71E+07 | 3.66E+07 | 3.01E+07 | 3.88E+07 | 3.62E+07 |
| 3.89E+05 | 4.07E+05 | 2.37E+05 | 4.42E+06 | 4.57E+06 | 3.85E+06 | 3.93E+06 | 4.06E+06 | 4.18E+06 |
| 6.46E+06 | 6.18E+06 | 5.56E+06 | 2.43E+07 | 3.08E+07 | 2.51E+07 | 3.25E+07 | 3.20E+07 | 2.92E+07 |
| 5.89E+05 | 5.83E+05 | 5.05E+05 | 2.57E+06 | 2.63E+06 | 2.32E+06 | 2.37E+06 | 2.96E+06 | 2.24E+06 |
| 2.72E+05 | 9.00E+00 | 1.64E+05 | 1.01E+06 | 1.20E+06 | 8.51E+05 | 1.09E+06 | 9.98E+05 | 9.34E+05 |
| 6.62E+06 | 6.98E+06 | 6.49E+06 | 8.34E+06 | 9.79E+06 | 8.07E+06 | 1.07E+07 | 1.03E+07 | 8.76E+06 |
| 2.68E+05 | 2.91E+05 | 1.90E+05 | 6.72E+04 | 5.83E+04 | 1.68E+04 | 4.12E+04 | 5.97E+04 | 3.72E+04 |
| 3.50E+07 | 2.99E+07 | 2.96E+07 | 1.30E+07 | 1.36E+07 | 2.07E+07 | 1.27E+07 | 1.36E+07 | 1.10E+07 |
| 1.35E+06 | 1.75E+06 | 1.33E+06 | 5.23E+05 | 5.67E+05 | 7.95E+05 | 4.17E+05 | 6.37E+05 | 6.85E+05 |
| 2.91E+05 | 2.62E+05 | 2.41E+05 | 1.57E+05 | 1.49E+05 | 1.33E+05 | 1.61E+05 | 1.39E+05 | 1.12E+05 |
| 5.95E+05 | 6.41E+05 | 6.23E+05 | 9.68E+05 | 1.01E+06 | 9.31E+05 | 6.72E+05 | 1.10E+06 | 7.96E+05 |
| 1.76E+05 | 1.43E+05 | 5.32E+04 | 4.33E+05 | 3.68E+05 | 3.65E+05 | 1.90E+05 | 2.07E+05 | 2.34E+05 |
| 3.58E+04 | 1.47E+04 | 4.46E+04 | 1.06E+05 | 3.64E+04 | 9.16E+04 | 6.11E+04 | 6.95E+04 | 8.22E+04 |
| 2.17E+03 | 1.04E+03 | 1.04E+03 | 3.19E+03 | 3.47E+03 | 2.71E+04 | 2.01E+03 | 4.18E+03 | 2.26E+03 |
| 3.54E+03 | 3.75E+03 | 3.96E+03 | 1.09E+04 | 1.12E+04 | 3.78E+04 | 5.72E+03 | 1.59E+04 | 1.05E+04 |
| 4.26E+03 | 5.52E+03 | 3.57E+03 | 5.78E+03 | 5.21E+03 | 1.10E+04 | 5.24E+03 | 6.60E+03 | 5.94E+03 |
| 1.18E+05 | 1.45E+05 | 1.07E+05 | 1.58E+05 | 1.58E+05 | 2.32E+05 | 1.63E+05 | 1.76E+05 | 1.39E+05 |
| 9.01E+03 | 9.36E+03 | 6.08E+03 | 8.92E+03 | 7.73E+03 | 1.09E+04 | 9.59E+03 | 9.52E+03 | 1.09E+04 |
| 1.98E+03 | 1.68E+03 | 1.78E+03 | 2.30E+03 | 3.32E+03 | 4.54E+03 | 2.18E+03 | 3.45E+03 | 2.14E+03 |

|          |          |          |          |          |          |          |          |          |
|----------|----------|----------|----------|----------|----------|----------|----------|----------|
| 1.64E+06 | 1.69E+06 | 1.83E+06 | 2.82E+06 | 2.14E+06 | 2.67E+06 | 2.44E+06 | 2.41E+06 | 2.13E+06 |
| 1.50E+04 | 1.72E+04 | 1.48E+04 | 1.90E+04 | 2.20E+04 | 2.14E+04 | 2.07E+04 | 2.14E+04 | 2.09E+04 |
| 1.35E+05 | 1.58E+05 | 1.27E+05 | 1.93E+05 | 1.74E+05 | 1.97E+05 | 1.98E+05 | 2.12E+05 | 1.89E+05 |
| 2.81E+06 | 3.55E+06 | 2.87E+06 | 4.25E+06 | 3.97E+06 | 4.42E+06 | 4.51E+06 | 4.62E+06 | 4.27E+06 |
| 4.45E+03 | 9.33E+03 | 8.21E+03 | 2.48E+05 | 1.28E+05 | 2.17E+05 | 1.39E+05 | 1.43E+05 | 2.37E+05 |
| 2.23E+04 | 1.71E+04 | 9.74E+03 | 7.10E+04 | 5.34E+04 | 9.90E+04 | 4.06E+04 | 3.35E+04 | 1.07E+05 |
| 1.30E+04 | 2.26E+04 | 1.68E+04 | 4.37E+04 | 3.53E+04 | 3.39E+04 | 2.39E+04 | 2.26E+04 | 3.10E+04 |
| 8.00E+04 | 7.24E+04 | 7.22E+04 | 7.35E+04 | 5.72E+04 | 5.72E+04 | 3.11E+04 | 5.37E+04 | 3.67E+04 |
| 1.84E+04 | 2.28E+04 | 2.05E+04 | 2.57E+04 | 2.02E+04 | 1.48E+05 | 1.86E+04 | 3.67E+04 | 2.70E+04 |
| 9.00E+00 | 9.00E+00 | 9.00E+00 | 1.90E+05 | 1.70E+05 | 2.26E+05 | 2.07E+05 | 1.59E+05 | 2.46E+05 |
| 1.19E+04 | 1.04E+04 | 4.20E+03 | 9.68E+04 | 6.84E+04 | 5.65E+04 | 6.09E+04 | 4.51E+04 | 9.21E+04 |
| 1.54E+04 | 2.13E+04 | 9.00E+00 | 2.81E+05 | 2.39E+05 | 2.49E+05 | 3.93E+05 | 2.10E+05 | 3.08E+05 |
| 5.85E+04 | 6.40E+04 | 6.08E+04 | 1.22E+04 | 9.00E+00 | 9.00E+00 | 9.00E+00 | 9.00E+00 | 9.00E+00 |
| 8.97E+05 | 1.01E+06 | 7.20E+05 | 6.97E+04 | 4.04E+04 | 1.26E+05 | 6.74E+04 | 8.43E+04 | 7.79E+04 |
| 2.55E+07 | 3.11E+07 | 2.32E+07 | 1.96E+06 | 1.75E+06 | 4.08E+06 | 1.88E+06 | 2.62E+06 | 2.51E+06 |
| 1.91E+06 | 2.54E+06 | 1.60E+06 | 9.38E+05 | 8.07E+05 | 1.33E+06 | 5.72E+05 | 7.49E+05 | 8.79E+05 |
| 2.96E+06 | 4.16E+06 | 2.87E+06 | 5.04E+05 | 1.74E+05 | 7.36E+05 | 3.29E+05 | 7.44E+05 | 5.19E+05 |
| 1.25E+07 | 1.63E+07 | 1.33E+07 | 8.25E+06 | 7.73E+06 | 1.05E+07 | 5.77E+06 | 8.68E+06 | 8.17E+06 |
| 3.57E+03 | 2.65E+04 | 9.06E+03 | 6.88E+05 | 5.40E+05 | 5.61E+05 | 3.87E+05 | 6.99E+05 | 4.53E+05 |
| 3.18E+05 | 3.35E+05 | 3.04E+05 | 9.00E+00 | 9.00E+00 | 9.00E+00 | 9.00E+00 | 9.00E+00 | 9.00E+00 |
| 2.07E+05 | 3.85E+05 | 1.94E+05 | 1.50E+06 | 1.23E+06 | 1.53E+06 | 6.37E+05 | 1.58E+06 | 9.32E+05 |
| 2.36E+07 | 2.67E+07 | 2.30E+07 | 3.74E+07 | 3.27E+07 | 3.44E+07 | 2.91E+07 | 3.87E+07 | 3.18E+07 |
| 9.17E+04 | 2.02E+05 | 1.02E+05 | 2.18E+06 | 4.10E+06 | 4.73E+06 | 1.48E+06 | 3.34E+06 | 2.08E+06 |
| 8.98E+06 | 1.12E+07 | 8.74E+06 | 9.02E+05 | 7.76E+05 | 1.76E+06 | 8.90E+05 | 8.81E+05 | 1.07E+06 |
| 6.47E+05 | 6.80E+05 | 5.79E+05 | 2.83E+06 | 2.41E+06 | 3.29E+06 | 2.93E+06 | 1.72E+06 | 1.16E+06 |
| 5.58E+05 | 7.20E+05 | 5.05E+05 | 3.87E+05 | 4.65E+05 | 6.01E+05 | 3.63E+04 | 4.44E+05 | 2.78E+05 |
| 1.64E+05 | 1.97E+05 | 1.30E+05 | 1.36E+05 | 1.29E+05 | 1.66E+05 | 2.98E+04 | 1.78E+05 | 7.92E+04 |
| 2.80E+04 | 4.90E+04 | 3.48E+04 | 1.44E+06 | 1.87E+06 | 1.66E+06 | 1.44E+05 | 1.83E+06 | 1.12E+06 |
| 4.70E+05 | 6.26E+05 | 4.88E+05 | 2.31E+06 | 2.57E+06 | 2.08E+06 | 3.42E+05 | 2.67E+06 | 1.99E+06 |
| 1.32E+05 | 1.17E+05 | 1.47E+05 | 4.72E+05 | 6.19E+05 | 3.56E+05 | 1.75E+05 | 3.69E+05 | 7.67E+05 |
| 2.32E+05 | 2.58E+05 | 1.85E+05 | 1.44E+06 | 1.57E+06 | 1.50E+06 | 4.57E+05 | 1.52E+06 | 1.24E+06 |
| 9.00E+00 | 9.00E+00 | 9.00E+00 | 3.24E+05 | 2.57E+05 | 3.86E+05 | 4.29E+05 | 3.51E+05 | 3.02E+05 |
| 4.53E+03 | 6.41E+03 | 6.42E+03 | 8.01E+05 | 6.68E+05 | 8.07E+05 | 1.23E+06 | 1.20E+06 | 8.09E+05 |
| 9.00E+00 | 2.74E+04 | 9.00E+00 | 2.75E+05 | 3.28E+05 | 2.67E+05 | 2.11E+05 | 2.94E+05 | 2.45E+05 |
| 1.42E+06 | 1.71E+06 | 1.37E+06 | 4.88E+06 | 3.51E+06 | 3.22E+06 | 5.15E+06 | 5.27E+06 | 4.72E+06 |
| 2.01E+03 | 8.21E+03 | 2.05E+03 | 1.17E+05 | 1.13E+05 | 8.98E+04 | 5.85E+04 | 9.26E+04 | 6.01E+04 |
| 9.00E+00 | 9.00E+00 | 9.00E+00 | 1.58E+05 | 2.11E+05 | 1.97E+05 | 2.77E+05 | 2.40E+05 | 1.70E+05 |
| 6.65E+05 | 7.14E+05 | 5.30E+05 | 8.25E+05 | 8.00E+05 | 9.00E+05 | 1.50E+06 | 9.16E+05 | 9.04E+05 |
| 2.02E+05 | 2.44E+05 | 1.88E+05 | 1.00E+05 | 1.41E+05 | 1.42E+05 | 1.24E+04 | 1.13E+05 | 2.65E+04 |
| 3.10E+03 | 9.00E+00 | 9.00E+00 | 2.96E+05 | 2.59E+05 | 2.97E+05 | 6.55E+04 | 3.15E+05 | 2.79E+05 |
| 4.36E+04 | 4.89E+04 | 4.02E+04 | 3.00E+05 | 2.77E+05 | 2.63E+05 | 2.94E+05 | 3.12E+05 | 3.31E+05 |
| 3.33E+06 | 3.40E+06 | 2.25E+06 | 1.60E+05 | 1.33E+05 | 3.65E+05 | 1.03E+05 | 1.88E+05 | 1.28E+05 |
| 8.98E+03 | 1.66E+04 | 5.16E+03 | 1.31E+04 | 8.54E+03 | 2.10E+04 | 3.19E+03 | 9.34E+03 | 1.87E+03 |
| 1.53E+06 | 2.14E+06 | 1.15E+06 | 4.92E+07 | 4.13E+07 | 5.42E+07 | 4.50E+07 | 5.96E+07 | 4.10E+07 |
| 3.21E+04 | 4.01E+04 | 3.01E+04 | 7.66E+05 | 5.96E+05 | 7.51E+05 | 6.44E+05 | 1.01E+06 | 6.11E+05 |
| 2.03E+05 | 2.39E+05 | 1.41E+05 | 4.25E+06 | 4.18E+06 | 5.57E+06 | 1.92E+06 | 5.67E+06 | 2.98E+06 |
| 2.18E+05 | 2.70E+05 | 1.76E+05 | 1.70E+04 | 1.68E+04 | 2.11E+04 | 1.72E+03 | 2.45E+04 | 1.62E+04 |
| 2.36E+07 | 2.30E+07 | 1.86E+07 | 1.13E+06 | 1.07E+06 | 2.57E+06 | 1.23E+06 | 1.48E+06 | 1.04E+06 |
| 6.43E+05 | 7.27E+05 | 5.60E+05 | 3.36E+06 | 3.20E+06 | 3.88E+06 | 2.66E+06 | 4.40E+06 | 2.44E+06 |
| 2.44E+04 | 5.75E+04 | 9.00E+00 | 1.21E+05 | 1.23E+05 | 1.25E+05 | 5.22E+04 | 1.68E+05 | 8.64E+04 |
| 7.41E+05 | 8.68E+05 | 7.43E+05 | 2.93E+05 | 3.07E+05 | 3.43E+05 | 6.87E+04 | 2.33E+05 | 2.34E+05 |
| 1.15E+05 | 1.24E+05 | 6.33E+04 | 1.79E+04 | 1.87E+04 | 8.10E+04 | 1.81E+04 | 1.13E+04 | 1.01E+04 |
| 3.39E+07 | 4.03E+07 | 2.77E+07 | 4.40E+06 | 3.58E+06 | 7.84E+06 | 3.52E+06 | 5.48E+06 | 3.59E+06 |
| 2.25E+07 | 2.42E+07 | 1.94E+07 | 5.40E+06 | 5.02E+06 | 7.17E+06 | 4.98E+06 | 6.18E+06 | 5.25E+06 |

|          |          |          |          |          |          |          |          |          |
|----------|----------|----------|----------|----------|----------|----------|----------|----------|
| 1.56E+06 | 1.68E+06 | 1.13E+06 | 2.15E+07 | 2.17E+07 | 1.71E+07 | 1.63E+07 | 2.92E+07 | 2.42E+07 |
| 9.00E+00 | 1.45E+03 | 9.00E+00 | 8.07E+04 | 8.75E+04 | 8.08E+04 | 1.48E+04 | 8.33E+04 | 1.20E+05 |
| 9.00E+05 | 1.26E+06 | 7.87E+05 | 3.84E+06 | 3.76E+06 | 3.48E+06 | 2.02E+06 | 4.70E+06 | 3.59E+06 |
| 3.58E+06 | 2.59E+06 | 2.59E+06 | 2.20E+06 | 2.53E+06 | 2.04E+06 | 1.81E+06 | 2.81E+06 | 2.60E+06 |
| 1.56E+05 | 2.17E+05 | 1.26E+05 | 4.24E+04 | 3.81E+04 | 2.41E+04 | 2.47E+04 | 5.57E+04 | 1.76E+04 |
| 3.81E+05 | 3.57E+05 | 2.61E+05 | 8.05E+05 | 4.77E+05 | 7.50E+05 | 4.06E+05 | 6.53E+05 | 7.54E+05 |
| 9.45E+04 | 1.12E+05 | 6.84E+04 | 8.98E+03 | 1.01E+04 | 3.39E+04 | 7.05E+03 | 1.18E+04 | 1.12E+04 |
| 1.27E+06 | 1.30E+06 | 9.32E+05 | 3.98E+07 | 3.59E+07 | 2.97E+07 | 2.54E+07 | 4.17E+07 | 2.65E+07 |
| 6.69E+04 | 7.96E+04 | 3.74E+04 | 7.78E+06 | 6.91E+06 | 5.28E+06 | 1.55E+07 | 1.02E+07 | 7.26E+06 |
| 1.45E+03 | 2.40E+03 | 4.68E+03 | 7.29E+05 | 6.14E+05 | 4.88E+05 | 1.20E+06 | 6.81E+05 | 6.64E+05 |
| 3.25E+03 | 9.00E+00 | 9.00E+00 | 2.67E+05 | 3.08E+05 | 2.45E+05 | 2.67E+05 | 4.12E+05 | 3.38E+05 |
| 9.00E+00 | 9.00E+00 | 1.63E+04 | 7.70E+05 | 6.25E+05 | 5.33E+05 | 8.12E+05 | 6.35E+05 | 8.93E+05 |
| 2.46E+04 | 2.28E+04 | 1.49E+04 | 1.56E+06 | 1.28E+06 | 1.26E+06 | 8.96E+05 | 1.62E+06 | 3.08E+05 |
| 9.00E+00 | 9.00E+00 | 8.21E+02 | 5.49E+04 | 5.16E+04 | 5.72E+04 | 8.83E+03 | 5.30E+04 | 3.53E+04 |
| 9.88E+03 | 2.98E+04 | 1.67E+04 | 7.24E+05 | 5.21E+05 | 5.50E+05 | 5.68E+05 | 7.67E+05 | 5.69E+05 |
| 1.71E+03 | 9.00E+00 | 9.00E+00 | 1.88E+04 | 9.00E+00 | 9.00E+00 | 9.00E+00 | 1.17E+04 | 9.00E+00 |
| 9.00E+00 | 9.00E+00 | 1.36E+04 | 5.50E+05 | 5.52E+05 | 5.03E+05 | 4.70E+05 | 5.30E+05 | 5.11E+05 |
| 5.79E+04 | 2.41E+05 | 1.82E+05 | 1.01E+06 | 1.62E+06 | 9.64E+05 | 1.09E+06 | 1.22E+06 | 1.03E+06 |
| 1.23E+05 | 1.40E+05 | 9.27E+04 | 3.99E+05 | 4.34E+05 | 3.00E+05 | 3.44E+05 | 4.18E+05 | 3.35E+05 |
| 2.92E+04 | 4.54E+04 | 2.16E+04 | 1.84E+05 | 1.21E+05 | 1.22E+05 | 1.10E+05 | 1.84E+05 | 1.88E+05 |
| 8.58E+05 | 9.72E+05 | 5.92E+05 | 2.98E+05 | 2.00E+05 | 4.06E+05 | 1.27E+05 | 2.17E+05 | 2.23E+05 |
| 2.23E+06 | 2.86E+06 | 1.62E+06 | 3.17E+05 | 2.63E+05 | 4.90E+05 | 1.38E+05 | 3.80E+05 | 2.31E+05 |
| 2.43E+06 | 2.75E+06 | 1.70E+06 | 3.64E+05 | 2.63E+05 | 5.19E+05 | 1.32E+05 | 3.43E+05 | 3.24E+05 |
| 3.61E+04 | 5.71E+04 | 2.65E+04 | 6.68E+05 | 6.18E+05 | 7.32E+05 | 3.72E+05 | 7.16E+05 | 7.57E+05 |
| 2.38E+05 | 2.61E+05 | 1.77E+05 | 5.01E+05 | 4.00E+05 | 4.38E+05 | 2.66E+05 | 5.30E+05 | 5.41E+05 |
| 8.54E+03 | 1.12E+04 | 1.58E+04 | 4.62E+05 | 3.43E+05 | 3.16E+05 | 2.29E+05 | 3.73E+05 | 6.29E+05 |
| 2.02E+05 | 9.65E+04 | 3.01E+04 | 1.11E+06 | 9.88E+05 | 1.48E+06 | 1.24E+06 | 9.66E+05 | 1.03E+06 |
| 9.00E+00 | 9.84E+04 | 9.00E+00 | 4.95E+05 | 7.95E+05 | 7.63E+05 | 3.41E+05 | 9.10E+05 | 7.42E+05 |
| 9.00E+00 | 3.29E+03 | 9.00E+00 | 4.94E+05 | 3.62E+05 | 1.98E+05 | 6.25E+05 | 5.49E+05 | 3.16E+05 |
| 8.62E+05 | 7.80E+05 | 1.06E+06 | 6.19E+05 | 7.99E+05 | 1.79E+06 | 9.05E+05 | 9.83E+05 | 9.72E+05 |
| 9.00E+00 | 9.00E+00 | 9.00E+00 | 5.35E+04 | 5.37E+04 | 3.83E+04 | 1.28E+04 | 2.74E+04 | 3.54E+04 |
| 8.60E+04 | 7.18E+04 | 7.73E+04 | 1.22E+05 | 1.86E+05 | 2.62E+05 | 9.14E+04 | 1.67E+05 | 1.81E+05 |
| 1.50E+06 | 5.52E+05 | 1.38E+06 | 1.36E+05 | 1.63E+05 | 2.40E+05 | 5.71E+04 | 1.36E+05 | 1.36E+05 |
| 8.32E+05 | 1.10E+06 | 7.71E+05 | 2.15E+06 | 2.26E+06 | 2.90E+06 | 1.24E+06 | 2.70E+06 | 1.67E+06 |
| 8.27E+04 | 9.59E+04 | 5.11E+04 | 1.65E+05 | 1.85E+05 | 2.59E+05 | 1.11E+05 | 2.24E+05 | 1.59E+05 |
| 6.87E+03 | 6.34E+03 | 9.00E+00 | 3.52E+04 | 3.05E+04 | 2.96E+04 | 1.02E+04 | 2.06E+04 | 3.22E+04 |
| 5.00E+07 | 6.40E+07 | 4.81E+07 | 4.73E+07 | 4.40E+07 | 5.83E+07 | 4.50E+07 | 6.14E+07 | 4.32E+07 |
| 2.86E+05 | 3.05E+05 | 2.60E+05 | 9.99E+05 | 1.04E+06 | 8.81E+05 | 9.31E+05 | 1.24E+06 | 7.64E+05 |
| 1.53E+06 | 1.56E+06 | 1.61E+06 | 2.65E+05 | 2.37E+05 | 7.10E+05 | 3.25E+05 | 3.14E+05 | 1.97E+05 |
| 1.40E+06 | 1.52E+06 | 1.35E+06 | 5.38E+05 | 4.90E+05 | 9.13E+05 | 5.33E+05 | 7.74E+05 | 6.36E+05 |
| 6.62E+03 | 7.78E+03 | 3.06E+03 | 1.35E+05 | 1.37E+05 | 1.55E+05 | 1.04E+04 | 1.25E+05 | 7.57E+04 |
| 2.20E+05 | 3.17E+05 | 1.38E+05 | 3.91E+06 | 3.11E+06 | 4.39E+06 | 1.61E+06 | 3.62E+06 | 2.97E+06 |
| 3.13E+03 | 3.42E+03 | 2.13E+03 | 2.59E+05 | 2.54E+05 | 2.25E+05 | 1.31E+05 | 2.41E+05 | 1.44E+05 |
| 2.49E+04 | 2.89E+04 | 1.76E+04 | 1.42E+03 | 4.00E+03 | 7.57E+03 | 2.03E+03 | 1.42E+03 | 1.48E+03 |
| 2.03E+03 | 4.66E+03 | 2.84E+03 | 4.42E+03 | 3.71E+03 | 1.24E+04 | 2.13E+03 | 3.32E+03 | 1.85E+03 |
| 1.36E+05 | 1.69E+05 | 9.76E+04 | 1.04E+04 | 1.21E+04 | 1.67E+04 | 1.48E+03 | 9.19E+03 | 7.73E+03 |
| 4.58E+04 | 7.77E+04 | 2.58E+04 | 9.00E+00 | 9.00E+00 | 1.12E+04 | 9.00E+00 | 9.00E+00 | 9.00E+00 |
| 1.48E+06 | 1.55E+06 | 1.31E+06 | 2.49E+05 | 2.49E+05 | 6.54E+05 | 3.20E+05 | 2.73E+05 | 2.25E+05 |
| 1.83E+07 | 2.04E+07 | 1.57E+07 | 2.43E+07 | 5.42E+07 | 2.49E+07 | 2.21E+07 | 3.05E+07 | 3.08E+07 |
| 1.24E+08 | 1.33E+08 | 1.03E+08 | 6.57E+07 | 6.30E+07 | 6.46E+07 | 6.13E+07 | 7.74E+07 | 6.23E+07 |
| 4.80E+06 | 4.83E+06 | 3.90E+06 | 1.58E+07 | 1.52E+07 | 1.52E+07 | 1.31E+07 | 1.51E+07 | 1.29E+07 |
| 2.35E+05 | 2.94E+05 | 2.25E+05 | 1.58E+06 | 1.48E+06 | 1.28E+06 | 2.27E+06 | 1.81E+06 | 1.38E+06 |
| 1.21E+05 | 1.55E+05 | 8.93E+04 | 9.00E+00 | 9.00E+00 | 9.00E+00 | 9.00E+00 | 9.00E+00 | 9.00E+00 |
| 2.11E+05 | 2.42E+05 | 2.13E+05 | 5.21E+05 | 4.19E+05 | 4.37E+05 | 2.58E+05 | 4.06E+05 | 4.48E+05 |



|          |          |          |          |          |          |          |          |          |
|----------|----------|----------|----------|----------|----------|----------|----------|----------|
| 6.71E+04 | 7.53E+04 | 4.86E+04 | 1.45E+04 | 1.15E+04 | 3.88E+04 | 5.99E+03 | 1.67E+04 | 9.78E+03 |
| 5.53E+03 | 7.97E+03 | 6.20E+03 | 5.15E+03 | 6.58E+03 | 2.80E+04 | 4.15E+03 | 5.74E+03 | 5.48E+03 |
| 3.16E+05 | 5.50E+05 | 3.81E+05 | 2.48E+04 | 3.04E+04 | 9.00E+00 | 9.00E+00 | 9.00E+00 | 9.00E+00 |
| 7.82E+04 | 1.17E+05 | 6.46E+04 | 9.00E+00 | 9.00E+00 | 9.00E+00 | 9.00E+00 | 9.00E+00 | 9.00E+00 |
| 2.60E+06 | 2.83E+06 | 2.05E+06 | 5.06E+04 | 6.19E+04 | 2.68E+05 | 4.11E+04 | 6.23E+04 | 4.92E+04 |
| 5.80E+04 | 5.92E+04 | 3.06E+04 | 1.72E+05 | 1.74E+05 | 1.37E+05 | 8.79E+04 | 1.31E+05 | 9.46E+04 |
| 4.49E+04 | 4.84E+04 | 3.62E+04 | 9.00E+00 | 9.00E+00 | 9.00E+00 | 9.00E+00 | 9.00E+00 | 9.00E+00 |
| 9.00E+00 | 9.00E+00 | 4.43E+04 | 9.00E+00 | 9.00E+00 | 9.00E+00 | 9.00E+00 | 9.00E+00 | 9.00E+00 |
| 4.31E+06 | 4.22E+06 | 3.34E+06 | 9.16E+05 | 1.08E+06 | 1.30E+06 | 2.57E+05 | 1.07E+06 | 5.11E+05 |
| 3.23E+04 | 3.95E+04 | 2.09E+04 | 1.16E+04 | 1.19E+04 | 3.05E+04 | 9.00E+00 | 9.00E+00 | 1.55E+04 |
| 6.08E+04 | 6.28E+04 | 4.07E+04 | 9.00E+00 | 9.00E+00 | 9.00E+00 | 9.00E+00 | 9.00E+00 | 9.00E+00 |
| 2.93E+06 | 3.78E+06 | 2.66E+06 | 2.49E+05 | 2.63E+05 | 5.01E+05 | 2.38E+05 | 2.42E+05 | 3.01E+05 |
| 5.98E+06 | 6.34E+06 | 5.35E+06 | 5.77E+04 | 2.91E+05 | 5.75E+05 | 2.23E+05 | 3.09E+05 | 2.52E+05 |
| 1.89E+06 | 2.54E+06 | 1.86E+06 | 6.97E+04 | 7.21E+04 | 3.63E+05 | 4.00E+04 | 7.78E+04 | 6.03E+04 |
| 1.02E+06 | 1.04E+06 | 7.80E+05 | 3.89E+04 | 6.42E+04 | 2.47E+05 | 2.06E+04 | 7.56E+04 | 4.42E+04 |
| 2.16E+07 | 2.44E+07 | 1.67E+07 | 4.01E+05 | 3.97E+05 | 3.20E+06 | 3.19E+05 | 4.57E+05 | 3.90E+05 |
| 8.51E+06 | 9.37E+06 | 6.50E+06 | 6.36E+04 | 5.09E+04 | 2.04E+05 | 4.63E+04 | 8.20E+04 | 4.56E+04 |
| 2.29E+06 | 2.17E+06 | 1.54E+06 | 3.81E+05 | 3.99E+05 | 1.31E+06 | 3.62E+05 | 4.38E+05 | 4.97E+05 |
| 2.50E+07 | 2.86E+07 | 2.72E+07 | 1.34E+07 | 1.49E+07 | 4.09E+07 | 1.54E+07 | 1.58E+07 | 1.70E+07 |
| 5.74E+04 | 2.93E+04 | 5.11E+04 | 1.81E+05 | 2.42E+05 | 6.84E+05 | 9.65E+04 | 1.94E+05 | 3.00E+05 |
| 5.57E+04 | 6.91E+04 | 3.83E+04 | 6.06E+02 | 9.00E+00 | 9.00E+00 | 9.00E+00 | 9.00E+00 | 9.00E+00 |
| 6.81E+05 | 8.07E+05 | 4.82E+05 | 9.55E+03 | 7.78E+03 | 1.74E+04 | 4.56E+03 | 5.60E+03 | 8.68E+03 |
| 2.69E+06 | 3.27E+06 | 2.49E+06 | 3.17E+06 | 3.67E+06 | 6.21E+06 | 2.02E+06 | 3.71E+06 | 3.46E+06 |
| 3.92E+07 | 4.94E+07 | 3.78E+07 | 2.24E+06 | 2.06E+06 | 5.73E+06 | 1.55E+06 | 2.23E+06 | 2.46E+06 |
| 1.14E+06 | 1.35E+06 | 9.09E+05 | 5.44E+04 | 5.00E+04 | 1.71E+05 | 4.33E+04 | 6.89E+04 | 1.07E+05 |
| 5.06E+04 | 6.56E+04 | 4.10E+04 | 1.41E+04 | 9.00E+00 | 1.25E+04 | 2.32E+04 | 1.92E+04 | 1.51E+04 |
| 1.26E+06 | 1.56E+06 | 9.96E+05 | 1.94E+04 | 1.75E+04 | 7.02E+04 | 1.73E+04 | 1.99E+04 | 1.52E+04 |
| 2.31E+04 | 2.80E+04 | 1.57E+04 | 9.00E+00 | 9.00E+00 | 7.05E+04 | 1.95E+04 | 9.00E+00 | 9.00E+00 |
| 9.17E+05 | 1.12E+06 | 7.37E+05 | 2.06E+05 | 1.56E+05 | 1.41E+06 | 1.08E+06 | 9.22E+05 | 8.38E+05 |
| 1.68E+06 | 2.26E+06 | 1.30E+06 | 6.40E+04 | 5.60E+04 | 1.24E+05 | 9.22E+04 | 9.56E+04 | 6.43E+04 |
| 2.06E+06 | 2.39E+06 | 1.73E+06 | 1.57E+05 | 2.09E+05 | 5.41E+05 | 2.14E+05 | 2.13E+05 | 2.30E+05 |
| 2.31E+05 | 2.51E+05 | 1.67E+05 | 9.00E+00 | 9.00E+00 | 1.52E+04 | 9.00E+00 | 9.00E+00 | 9.00E+00 |
| 1.38E+05 | 1.86E+05 | 1.09E+05 | 2.28E+04 | 1.73E+04 | 4.94E+04 | 1.91E+04 | 2.47E+04 | 2.02E+04 |
| 4.90E+05 | 6.45E+05 | 4.42E+05 | 3.29E+04 | 3.71E+04 | 4.54E+04 | 1.74E+04 | 2.89E+04 | 2.48E+04 |
| 1.24E+06 | 1.37E+06 | 7.46E+05 | 2.80E+04 | 1.77E+04 | 3.34E+04 | 1.29E+04 | 2.60E+04 | 9.79E+03 |
| 4.91E+06 | 4.21E+06 | 3.20E+06 | 3.83E+05 | 4.19E+05 | 8.43E+05 | 3.96E+05 | 4.47E+05 | 2.63E+05 |
| 2.12E+06 | 2.73E+06 | 2.06E+06 | 1.27E+05 | 1.11E+05 | 2.20E+05 | 1.33E+05 | 1.20E+05 | 8.73E+04 |
| 2.49E+06 | 2.98E+06 | 1.88E+06 | 1.96E+05 | 2.15E+05 | 2.99E+05 | 1.44E+05 | 2.71E+05 | 1.29E+05 |
| 1.52E+05 | 1.90E+05 | 1.16E+05 | 8.21E+03 | 9.93E+03 | 2.26E+04 | 7.90E+03 | 2.19E+03 | 5.42E+03 |
| 3.85E+07 | 4.41E+07 | 2.79E+07 | 2.60E+05 | 2.06E+05 | 1.01E+06 | 2.28E+05 | 2.79E+05 | 1.57E+05 |
| 1.79E+06 | 2.30E+06 | 1.48E+06 | 4.42E+05 | 4.43E+05 | 1.26E+06 | 4.16E+05 | 5.23E+05 | 3.22E+05 |
| 1.85E+07 | 2.16E+07 | 1.25E+07 | 7.92E+04 | 3.98E+04 | 1.51E+05 | 4.46E+04 | 8.47E+04 | 2.45E+04 |
| 1.12E+06 | 1.54E+06 | 1.23E+06 | 1.12E+05 | 1.08E+05 | 3.53E+05 | 1.54E+05 | 1.49E+05 | 8.81E+04 |
| 5.18E+07 | 6.78E+07 | 3.96E+07 | 3.52E+06 | 3.28E+06 | 1.12E+07 | 3.54E+06 | 5.58E+06 | 3.36E+06 |
| 6.84E+04 | 8.14E+04 | 6.78E+04 | 7.15E+03 | 9.00E+00 | 9.00E+00 | 9.00E+00 | 9.00E+00 | 9.00E+00 |
| 1.51E+05 | 1.87E+05 | 1.00E+05 | 9.00E+00 | 9.00E+00 | 9.00E+00 | 9.00E+00 | 9.00E+00 | 9.00E+00 |
| 1.60E+06 | 1.71E+06 | 1.07E+06 | 9.39E+03 | 6.26E+03 | 1.58E+04 | 5.74E+03 | 1.17E+04 | 3.82E+03 |
| 5.32E+05 | 6.08E+05 | 3.74E+05 | 9.37E+03 | 5.99E+03 | 1.78E+04 | 5.93E+03 | 1.24E+04 | 3.92E+03 |
| 3.10E+07 | 4.13E+07 | 2.89E+07 | 7.40E+05 | 5.92E+05 | 1.48E+06 | 8.92E+05 | 8.94E+05 | 5.51E+05 |
| 2.03E+06 | 2.86E+06 | 1.97E+06 | 6.15E+05 | 6.94E+05 | 1.45E+06 | 5.24E+05 | 8.04E+05 | 4.72E+05 |
| 6.86E+07 | 7.71E+07 | 6.21E+07 | 1.68E+06 | 1.50E+06 | 3.18E+06 | 1.47E+06 | 2.09E+06 | 1.26E+06 |
| 6.04E+05 | 1.41E+06 | 1.46E+06 | 3.84E+04 | 1.60E+04 | 9.53E+04 | 3.80E+04 | 5.44E+04 | 3.16E+04 |
| 4.23E+05 | 5.32E+05 | 3.98E+05 | 1.55E+04 | 1.78E+04 | 3.54E+04 | 1.37E+04 | 1.84E+04 | 1.15E+04 |
| 6.51E+07 | 7.33E+07 | 4.49E+07 | 2.67E+05 | 2.12E+05 | 1.57E+06 | 2.20E+05 | 2.78E+05 | 1.86E+05 |

|          |          |          |          |          |          |          |          |          |
|----------|----------|----------|----------|----------|----------|----------|----------|----------|
| 1.65E+06 | 1.86E+06 | 1.51E+06 | 2.79E+05 | 3.27E+05 | 1.92E+06 | 3.17E+05 | 3.21E+05 | 2.66E+05 |
| 4.52E+05 | 5.40E+05 | 3.10E+05 | 9.00E+00 | 9.00E+00 | 9.00E+00 | 9.00E+00 | 2.62E+03 | 9.00E+00 |
| 2.12E+07 | 2.43E+07 | 1.54E+07 | 6.32E+04 | 3.34E+04 | 1.57E+05 | 4.49E+04 | 6.56E+04 | 2.44E+04 |
| 9.12E+05 | 4.67E+06 | 3.12E+06 | 2.53E+04 | 1.81E+04 | 7.44E+04 | 2.49E+04 | 1.09E+04 | 5.13E+03 |
| 5.32E+07 | 6.16E+07 | 5.80E+07 | 6.53E+06 | 4.22E+06 | 1.64E+07 | 6.09E+06 | 6.43E+06 | 5.90E+06 |
| 4.24E+04 | 2.00E+05 | 1.54E+05 | 7.55E+04 | 8.41E+04 | 2.47E+05 | 5.61E+04 | 8.84E+04 | 7.92E+04 |
| 3.94E+06 | 4.25E+06 | 2.54E+06 | 1.58E+04 | 7.30E+03 | 2.29E+04 | 8.86E+03 | 1.77E+04 | 6.59E+03 |
| 2.68E+06 | 2.69E+06 | 1.73E+06 | 9.43E+05 | 9.99E+05 | 1.52E+06 | 6.95E+05 | 1.27E+06 | 9.59E+05 |
| 2.12E+07 | 2.44E+07 | 1.95E+07 | 7.37E+05 | 8.23E+05 | 1.56E+06 | 7.86E+05 | 1.02E+06 | 8.62E+05 |
| 3.08E+05 | 3.22E+05 | 1.92E+05 | 9.00E+00 | 9.00E+00 | 1.03E+03 | 9.00E+00 | 1.10E+03 | 9.00E+00 |
| 1.64E+05 | 1.98E+05 | 1.14E+05 | 1.28E+03 | 8.69E+02 | 2.51E+03 | 1.11E+03 | 2.24E+03 | 1.07E+03 |
| 1.63E+06 | 1.72E+06 | 1.28E+06 | 5.07E+04 | 3.82E+04 | 3.77E+05 | 6.48E+04 | 4.54E+04 | 4.82E+04 |
| 4.34E+05 | 5.37E+05 | 4.38E+05 | 2.89E+05 | 2.59E+05 | 1.35E+06 | 4.66E+05 | 3.06E+05 | 3.64E+05 |
| 2.41E+05 | 2.69E+05 | 2.07E+05 | 9.00E+00 | 9.00E+00 | 9.00E+00 | 9.00E+00 | 9.00E+00 | 9.00E+00 |
| 6.53E+04 | 8.31E+04 | 7.15E+04 | 2.24E+04 | 1.82E+04 | 2.64E+04 | 1.15E+04 | 2.38E+04 | 1.81E+04 |
| 1.63E+05 | 1.70E+05 | 1.13E+05 | 3.75E+04 | 3.10E+04 | 5.37E+04 | 2.91E+04 | 3.02E+04 | 2.99E+04 |
| 9.00E+00 | 9.00E+00 | 9.00E+00 | 1.00E+05 | 6.70E+04 | 9.98E+04 | 8.41E+04 | 9.84E+04 | 6.21E+04 |
| 5.72E+04 | 6.85E+04 | 5.36E+04 | 9.32E+04 | 8.01E+04 | 1.30E+05 | 7.03E+04 | 1.04E+05 | 7.40E+04 |
| 7.18E+04 | 9.74E+04 | 5.89E+04 | 1.05E+04 | 6.38E+03 | 1.69E+04 | 7.85E+03 | 1.12E+04 | 7.61E+03 |
| 2.76E+04 | 4.06E+04 | 3.01E+04 | 8.29E+04 | 5.65E+04 | 1.08E+05 | 4.83E+04 | 9.12E+04 | 4.95E+04 |
| 1.22E+06 | 1.37E+06 | 9.77E+05 | 3.48E+04 | 1.74E+04 | 7.95E+04 | 2.25E+04 | 3.75E+04 | 1.98E+04 |
| 2.48E+04 | 3.07E+04 | 1.83E+04 | 6.16E+04 | 5.44E+04 | 1.12E+05 | 4.88E+04 | 7.55E+04 | 3.06E+04 |
| 4.30E+05 | 4.77E+05 | 3.14E+05 | 4.82E+03 | 2.48E+03 | 7.07E+03 | 1.99E+03 | 5.42E+03 | 2.08E+03 |
| 5.08E+03 | 1.37E+03 | 3.64E+03 | 1.56E+04 | 1.62E+04 | 3.74E+04 | 9.06E+03 | 1.82E+04 | 1.13E+04 |
| 5.19E+05 | 6.29E+05 | 4.51E+05 | 2.27E+04 | 1.32E+04 | 4.11E+04 | 2.03E+04 | 2.45E+04 | 1.17E+04 |
| 2.04E+04 | 2.14E+04 | 1.86E+04 | 1.92E+04 | 1.57E+04 | 3.28E+04 | 1.69E+04 | 2.19E+04 | 8.52E+03 |
| 3.94E+05 | 5.46E+05 | 3.93E+05 | 2.30E+05 | 1.80E+05 | 2.65E+05 | 1.70E+05 | 2.86E+05 | 1.46E+05 |
| 2.60E+05 | 3.22E+05 | 2.28E+05 | 4.38E+04 | 4.00E+04 | 5.60E+04 | 3.11E+04 | 4.99E+04 | 3.13E+04 |
| 1.52E+05 | 1.91E+05 | 1.35E+05 | 2.38E+05 | 2.01E+05 | 7.86E+05 | 2.93E+05 | 2.12E+05 | 3.43E+05 |
| 1.30E+06 | 1.43E+06 | 1.02E+06 | 4.23E+04 | 2.63E+04 | 8.27E+04 | 2.11E+04 | 5.03E+04 | 5.37E+04 |
| 9.00E+00 | 1.31E+03 | 9.00E+00 | 3.62E+04 | 9.00E+00 | 2.52E+04 | 9.00E+00 | 9.00E+00 | 9.00E+00 |
| 9.00E+00 | 9.00E+00 | 9.00E+00 | 1.42E+04 | 1.18E+04 | 1.43E+04 | 1.04E+04 | 1.29E+04 | 1.02E+04 |
| 5.77E+04 | 6.20E+04 | 3.96E+04 | 5.69E+03 | 7.46E+03 | 1.15E+04 | 4.70E+03 | 8.62E+03 | 6.39E+03 |
| 2.56E+03 | 2.79E+03 | 1.44E+03 | 9.00E+00 | 9.00E+00 | 4.11E+04 | 2.63E+04 | 9.00E+00 | 9.00E+00 |
| 3.51E+04 | 3.84E+04 | 3.11E+04 | 5.85E+04 | 5.56E+04 | 9.32E+04 | 4.53E+04 | 6.82E+04 | 5.12E+04 |
| 5.76E+04 | 7.25E+04 | 5.62E+04 | 9.00E+00 | 9.00E+00 | 4.02E+03 | 2.23E+03 | 9.00E+00 | 9.00E+00 |
| 8.98E+04 | 9.27E+04 | 6.29E+04 | 9.00E+00 | 9.00E+00 | 9.00E+00 | 9.00E+00 | 9.00E+00 | 9.00E+00 |
| 2.06E+04 | 3.59E+04 | 2.76E+04 | 6.14E+04 | 5.32E+04 | 2.05E+05 | 6.48E+04 | 3.78E+04 | 2.29E+04 |
| 2.68E+04 | 2.78E+04 | 3.39E+04 | 7.18E+04 | 1.13E+05 | 2.13E+05 | 6.77E+04 | 1.01E+05 | 6.63E+04 |
| 7.28E+04 | 1.01E+05 | 6.83E+04 | 1.02E+05 | 1.06E+05 | 3.78E+05 | 1.15E+05 | 7.76E+04 | 1.00E+05 |
| 5.69E+06 | 8.09E+06 | 5.68E+06 | 1.05E+05 | 1.37E+05 | 8.44E+05 | 8.38E+04 | 1.65E+05 | 1.14E+05 |
| 1.26E+06 | 1.42E+06 | 8.94E+05 | 6.49E+04 | 7.24E+04 | 4.07E+05 | 1.68E+04 | 4.84E+04 | 6.00E+04 |
| 1.39E+05 | 1.64E+05 | 1.36E+05 | 8.54E+03 | 9.00E+00 | 3.69E+04 | 9.00E+00 | 9.00E+00 | 9.00E+00 |
| 6.74E+07 | 7.30E+07 | 5.31E+07 | 9.76E+05 | 9.09E+05 | 8.29E+06 | 7.24E+05 | 1.12E+06 | 8.75E+05 |
| 6.32E+05 | 6.72E+05 | 5.42E+05 | 9.96E+05 | 1.26E+06 | 5.14E+06 | 8.76E+05 | 9.31E+05 | 1.09E+06 |
| 1.02E+05 | 1.15E+05 | 1.07E+05 | 3.34E+04 | 2.56E+04 | 1.00E+05 | 2.26E+04 | 2.90E+04 | 1.22E+04 |
| 2.25E+07 | 2.77E+07 | 1.45E+07 | 1.33E+05 | 4.15E+04 | 3.10E+05 | 1.20E+05 | 1.76E+05 | 9.82E+04 |
| 1.34E+06 | 1.42E+06 | 1.81E+06 | 4.63E+04 | 3.05E+04 | 1.03E+05 | 2.83E+04 | 2.54E+04 | 9.00E+00 |
| 6.94E+06 | 7.85E+06 | 5.74E+06 | 2.81E+05 | 6.65E+05 | 6.78E+05 | 1.27E+05 | 2.58E+05 | 6.22E+05 |
| 3.63E+07 | 4.31E+07 | 3.87E+07 | 1.98E+07 | 2.01E+07 | 6.94E+07 | 2.23E+07 | 2.21E+07 | 2.45E+07 |
| 3.97E+05 | 5.39E+05 | 3.43E+05 | 5.28E+05 | 7.09E+05 | 2.05E+06 | 3.35E+05 | 6.54E+05 | 9.19E+05 |
| 5.57E+04 | 9.02E+04 | 4.31E+04 | 9.00E+00 | 9.00E+00 | 4.21E+03 | 9.00E+00 | 9.00E+00 | 9.00E+00 |
| 1.44E+06 | 1.45E+06 | 9.69E+05 | 1.76E+04 | 1.51E+04 | 3.64E+04 | 5.64E+03 | 2.73E+04 | 1.59E+04 |
| 7.66E+05 | 8.52E+05 | 5.31E+05 | 1.73E+04 | 1.57E+04 | 5.20E+04 | 2.06E+04 | 5.01E+04 | 3.95E+04 |

|          |          |          |          |          |          |          |          |          |
|----------|----------|----------|----------|----------|----------|----------|----------|----------|
| 8.73E+07 | 1.06E+08 | 8.39E+07 | 7.06E+06 | 6.52E+06 | 1.38E+07 | 7.04E+06 | 7.85E+06 | 7.88E+06 |
| 3.82E+06 | 3.70E+06 | 3.23E+06 | 4.53E+06 | 5.80E+06 | 1.20E+07 | 3.51E+06 | 5.95E+06 | 6.14E+06 |
| 3.05E+08 | 3.16E+08 | 2.79E+08 | 2.24E+07 | 2.04E+07 | 5.19E+07 | 2.11E+07 | 2.48E+07 | 2.53E+07 |
| 8.00E+04 | 1.02E+05 | 6.96E+04 | 9.00E+00 | 9.00E+00 | 7.46E+03 | 3.85E+03 | 9.00E+00 | 9.00E+00 |
| 8.86E+04 | 8.52E+04 | 4.35E+04 | 9.00E+00 | 9.00E+00 | 2.04E+04 | 9.00E+00 | 9.00E+00 | 9.00E+00 |
| 3.62E+06 | 4.77E+06 | 2.76E+06 | 1.27E+05 | 1.07E+05 | 3.21E+05 | 8.21E+04 | 1.38E+05 | 1.98E+05 |
| 2.25E+05 | 3.34E+05 | 1.93E+05 | 1.49E+04 | 2.12E+04 | 8.04E+04 | 1.44E+04 | 3.59E+04 | 6.61E+04 |
| 2.43E+06 | 2.79E+06 | 2.04E+06 | 5.69E+04 | 8.12E+04 | 2.60E+05 | 3.96E+04 | 5.67E+04 | 6.95E+04 |
| 1.88E+05 | 2.06E+05 | 1.83E+05 | 4.34E+04 | 5.31E+04 | 7.67E+04 | 8.93E+04 | 6.16E+04 | 2.51E+04 |
| 6.36E+06 | 8.57E+06 | 6.54E+06 | 5.27E+05 | 4.69E+05 | 1.89E+06 | 6.17E+05 | 6.34E+05 | 3.95E+05 |
| 3.56E+06 | 3.99E+06 | 2.05E+06 | 1.71E+04 | 2.86E+04 | 9.71E+04 | 2.62E+04 | 2.69E+04 | 2.24E+04 |
| 7.03E+04 | 4.52E+04 | 4.19E+04 | 9.00E+00 | 9.00E+00 | 9.00E+00 | 9.00E+00 | 9.00E+00 | 9.00E+00 |
| 3.57E+05 | 4.31E+05 | 2.99E+05 | 9.00E+00 | 9.00E+00 | 9.00E+00 | 9.00E+00 | 9.00E+00 | 9.00E+00 |
| 2.65E+05 | 2.76E+05 | 2.21E+05 | 5.41E+05 | 4.59E+05 | 8.84E+05 | 5.90E+05 | 4.39E+05 | 4.00E+05 |
| 2.95E+06 | 3.97E+06 | 2.67E+06 | 2.46E+05 | 1.73E+05 | 4.28E+05 | 2.93E+05 | 3.45E+05 | 2.08E+05 |
| 2.07E+05 | 2.90E+05 | 1.97E+05 | 3.00E+05 | 2.81E+05 | 4.59E+05 | 2.80E+05 | 3.96E+05 | 2.33E+05 |
| 1.08E+06 | 1.09E+06 | 1.07E+06 | 3.28E+05 | 4.10E+05 | 5.18E+05 | 3.42E+05 | 4.07E+05 | 2.81E+05 |
| 3.86E+06 | 4.56E+06 | 2.73E+06 | 1.22E+04 | 7.80E+03 | 7.70E+04 | 1.69E+04 | 1.85E+04 | 7.06E+03 |
| 9.50E+07 | 1.11E+08 | 6.32E+07 | 3.96E+05 | 3.03E+05 | 2.49E+06 | 4.67E+05 | 5.64E+05 | 2.64E+05 |
| 2.88E+06 | 3.47E+06 | 2.34E+06 | 1.16E+06 | 1.24E+06 | 3.76E+06 | 1.01E+06 | 1.42E+06 | 9.14E+05 |
| 1.43E+06 | 1.75E+06 | 9.17E+05 | 1.74E+03 | 2.45E+03 | 7.75E+03 | 9.99E+03 | 3.67E+03 | 3.01E+03 |
| 2.48E+07 | 3.09E+07 | 1.86E+07 | 9.38E+04 | 4.57E+04 | 1.60E+05 | 1.18E+05 | 1.34E+05 | 2.81E+04 |
| 6.31E+06 | 7.29E+06 | 6.18E+06 | 4.53E+05 | 3.83E+05 | 1.76E+06 | 5.13E+05 | 5.10E+05 | 3.13E+05 |
| 1.26E+08 | 1.46E+08 | 1.23E+08 | 1.16E+07 | 9.99E+06 | 3.59E+07 | 1.23E+07 | 1.28E+07 | 7.84E+06 |
| 1.44E+06 | 1.90E+06 | 1.27E+06 | 5.10E+05 | 5.27E+05 | 1.42E+06 | 2.54E+05 | 4.27E+05 | 3.48E+05 |
| 5.62E+04 | 6.71E+04 | 6.17E+04 | 9.00E+00 | 9.00E+00 | 2.74E+03 | 9.00E+00 | 9.00E+00 | 9.00E+00 |
| 1.94E+06 | 2.42E+06 | 1.44E+06 | 1.45E+04 | 1.27E+04 | 2.69E+04 | 1.06E+04 | 2.55E+04 | 1.73E+04 |
| 1.04E+06 | 1.31E+06 | 8.04E+05 | 2.39E+04 | 2.59E+04 | 4.92E+04 | 2.45E+04 | 5.06E+04 | 2.34E+04 |
| 8.79E+07 | 1.32E+08 | 7.91E+07 | 1.48E+06 | 1.20E+06 | 2.73E+06 | 1.81E+06 | 1.73E+06 | 8.42E+05 |
| 8.14E+06 | 9.11E+06 | 7.41E+06 | 2.29E+06 | 2.56E+06 | 5.32E+06 | 1.83E+06 | 2.86E+06 | 1.71E+06 |
| 3.53E+08 | 3.89E+08 | 2.53E+08 | 1.15E+07 | 9.64E+06 | 2.21E+07 | 9.35E+06 | 1.23E+07 | 7.48E+06 |
| 1.41E+05 | 1.47E+05 | 9.00E+04 | 1.79E+03 | 9.00E+00 | 7.97E+03 | 9.00E+00 | 9.00E+00 | 9.00E+00 |
| 1.18E+05 | 1.83E+05 | 1.17E+05 | 1.12E+04 | 3.48E+03 | 1.21E+04 | 2.33E+03 | 1.09E+04 | 3.97E+03 |
| 8.41E+04 | 1.04E+05 | 7.56E+04 | 9.00E+00 | 9.00E+00 | 9.00E+00 | 9.00E+00 | 9.00E+00 | 9.00E+00 |
| 1.72E+06 | 2.23E+06 | 1.47E+06 | 3.80E+04 | 2.52E+04 | 1.30E+05 | 3.24E+04 | 4.23E+04 | 2.72E+04 |
| 2.54E+06 | 3.23E+06 | 2.07E+06 | 2.36E+04 | 2.05E+04 | 8.70E+04 | 1.91E+04 | 3.93E+04 | 2.67E+04 |
| 5.40E+05 | 6.22E+05 | 4.57E+05 | 9.00E+00 | 9.00E+00 | 1.45E+04 | 9.00E+00 | 9.00E+00 | 9.00E+00 |
| 3.00E+06 | 3.23E+06 | 2.52E+06 | 1.77E+04 | 1.07E+04 | 1.65E+05 | 1.15E+04 | 3.67E+04 | 1.72E+04 |
| 4.26E+05 | 5.24E+05 | 3.68E+05 | 9.00E+00 | 9.00E+00 | 9.00E+00 | 9.00E+00 | 9.00E+00 | 9.00E+00 |
| 1.72E+08 | 1.95E+08 | 1.38E+08 | 5.38E+05 | 4.24E+05 | 3.45E+06 | 6.73E+05 | 7.32E+05 | 3.55E+05 |
| 1.62E+06 | 1.68E+06 | 1.22E+06 | 2.84E+05 | 3.08E+05 | 2.25E+06 | 2.99E+05 | 3.26E+05 | 2.85E+05 |
| 1.22E+06 | 1.51E+06 | 7.66E+05 | 9.00E+00 | 9.00E+00 | 9.00E+00 | 9.00E+00 | 9.00E+00 | 9.00E+00 |
| 7.32E+06 | 8.31E+06 | 4.67E+06 | 1.55E+04 | 2.03E+04 | 6.10E+03 | 1.41E+04 | 2.31E+04 | 6.08E+03 |
| 5.38E+07 | 6.50E+07 | 3.40E+07 | 9.11E+04 | 7.63E+04 | 2.68E+05 | 1.31E+05 | 1.28E+05 | 3.69E+04 |
| 2.83E+06 | 2.73E+06 | 2.45E+06 | 9.01E+03 | 9.00E+00 | 9.00E+00 | 1.07E+04 | 7.24E+03 | 1.61E+04 |
| 1.08E+07 | 1.20E+07 | 7.56E+06 | 2.88E+05 | 1.19E+05 | 3.37E+05 | 2.52E+05 | 1.49E+05 | 1.96E+05 |
| 6.19E+07 | 7.18E+07 | 5.50E+07 | 6.56E+06 | 6.72E+06 | 2.42E+07 | 8.84E+06 | 8.48E+06 | 7.99E+06 |
| 1.17E+06 | 1.40E+06 | 1.06E+06 | 1.94E+05 | 1.95E+05 | 7.42E+05 | 1.05E+05 | 1.94E+05 | 2.15E+05 |
| 1.31E+05 | 1.83E+05 | 1.04E+05 | 9.00E+00 | 9.00E+00 | 1.21E+03 | 9.00E+00 | 9.00E+00 | 9.00E+00 |
| 5.71E+06 | 7.52E+06 | 4.30E+06 | 2.45E+04 | 5.36E+03 | 2.23E+04 | 1.57E+04 | 3.61E+04 | 1.24E+04 |
| 2.05E+06 | 2.65E+06 | 1.33E+06 | 2.16E+04 | 1.35E+04 | 5.02E+04 | 1.49E+04 | 4.56E+04 | 2.28E+04 |
| 8.94E+07 | 1.06E+08 | 7.85E+07 | 2.19E+06 | 1.86E+06 | 3.63E+06 | 1.86E+06 | 2.90E+06 | 2.18E+06 |
| 2.90E+06 | 3.19E+06 | 2.43E+06 | 1.29E+06 | 1.65E+06 | 2.44E+06 | 1.22E+06 | 2.03E+06 | 1.42E+06 |
| 1.52E+08 | 1.78E+08 | 1.47E+08 | 8.03E+06 | 7.29E+06 | 1.74E+07 | 7.57E+06 | 8.86E+06 | 8.44E+06 |

|          |          |          |          |          |          |          |          |          |
|----------|----------|----------|----------|----------|----------|----------|----------|----------|
| 3.09E+05 | 4.06E+05 | 2.63E+05 | 5.85E+03 | 2.07E+03 | 9.91E+03 | 6.88E+02 | 2.47E+03 | 1.08E+03 |
| 2.29E+06 | 3.28E+06 | 1.85E+06 | 4.15E+04 | 3.43E+04 | 8.22E+04 | 3.09E+04 | 6.51E+04 | 4.64E+04 |
| 8.71E+05 | 1.13E+06 | 8.78E+05 | 3.91E+04 | 1.55E+04 | 8.30E+04 | 2.78E+04 | 3.95E+04 | 3.12E+04 |
| 4.82E+04 | 4.47E+04 | 2.71E+04 | 9.00E+00 | 9.00E+00 | 1.06E+04 | 9.00E+00 | 4.60E+03 | 9.00E+00 |
| 1.69E+06 | 1.80E+06 | 1.27E+06 | 3.87E+04 | 5.06E+04 | 3.23E+05 | 5.77E+04 | 6.35E+04 | 3.76E+04 |
| 1.03E+05 | 1.20E+05 | 9.05E+04 | 3.40E+04 | 3.20E+04 | 5.26E+05 | 4.53E+04 | 3.77E+04 | 4.28E+04 |
| 2.10E+05 | 2.26E+05 | 2.67E+05 | 9.00E+00 | 9.00E+00 | 8.59E+04 | 2.79E+04 | 9.00E+00 | 9.00E+00 |
| 1.05E+06 | 1.41E+06 | 1.03E+06 | 4.64E+05 | 4.56E+05 | 2.39E+06 | 7.50E+05 | 4.62E+05 | 5.44E+05 |
| 1.31E+04 | 2.63E+04 | 1.22E+04 | 4.86E+04 | 5.88E+04 | 2.62E+05 | 4.33E+04 | 5.15E+04 | 8.82E+04 |
| 1.09E+05 | 1.24E+05 | 1.17E+05 | 2.15E+04 | 4.09E+04 | 6.81E+04 | 6.00E+04 | 2.80E+04 | 6.27E+04 |
| 3.51E+06 | 3.35E+06 | 2.42E+06 | 4.68E+05 | 6.11E+05 | 2.00E+06 | 6.06E+05 | 5.40E+05 | 6.32E+05 |
| 1.30E+05 | 1.14E+05 | 7.02E+04 | 9.00E+00 | 9.00E+00 | 2.43E+04 | 3.65E+03 | 9.00E+00 | 9.00E+00 |
| 1.43E+05 | 1.26E+05 | 8.91E+04 | 8.50E+03 | 3.34E+04 | 7.49E+04 | 3.20E+04 | 1.99E+04 | 1.66E+04 |
| 4.83E+04 | 5.73E+04 | 4.25E+04 | 6.65E+03 | 1.04E+04 | 6.88E+04 | 2.70E+04 | 8.43E+03 | 3.62E+04 |
| 8.33E+04 | 9.77E+04 | 6.01E+04 | 9.00E+00 | 9.00E+00 | 9.00E+00 | 9.00E+00 | 3.61E+03 | 9.00E+00 |
| 2.62E+05 | 3.23E+05 | 1.99E+05 | 8.24E+04 | 7.53E+04 | 1.70E+05 | 9.67E+04 | 7.47E+04 | 4.98E+04 |
| 2.11E+06 | 2.50E+06 | 1.60E+06 | 3.78E+04 | 2.80E+04 | 1.11E+05 | 3.59E+04 | 3.42E+04 | 1.93E+04 |
| 9.50E+04 | 1.18E+05 | 6.76E+04 | 9.00E+00 | 9.00E+00 | 1.13E+04 | 9.57E+03 | 9.00E+00 | 9.00E+00 |
| 9.75E+04 | 1.19E+05 | 9.58E+04 | 3.45E+04 | 3.45E+04 | 4.04E+04 | 3.51E+04 | 4.18E+04 | 2.72E+04 |
| 4.67E+04 | 4.83E+04 | 4.11E+04 | 3.12E+04 | 2.60E+04 | 8.43E+04 | 2.55E+04 | 3.68E+04 | 1.81E+04 |
| 9.50E+04 | 9.08E+04 | 4.55E+04 | 9.00E+00 | 9.00E+00 | 9.00E+00 | 9.00E+00 | 9.00E+00 | 9.00E+00 |
| 1.98E+06 | 2.36E+06 | 1.84E+06 | 2.72E+05 | 2.41E+05 | 4.60E+05 | 1.89E+05 | 3.49E+05 | 1.85E+05 |
| 2.30E+05 | 2.30E+05 | 1.53E+05 | 3.28E+04 | 2.90E+04 | 6.14E+04 | 2.84E+04 | 2.77E+04 | 2.67E+04 |
| 5.67E+05 | 6.66E+05 | 5.17E+05 | 1.80E+05 | 1.87E+05 | 4.80E+05 | 2.02E+05 | 2.25E+05 | 1.86E+05 |
| 1.25E+05 | 1.30E+05 | 9.75E+04 | 9.00E+00 | 9.00E+00 | 8.06E+03 | 9.00E+00 | 9.00E+00 | 9.00E+00 |
| 2.92E+05 | 3.95E+05 | 2.67E+05 | 2.62E+04 | 2.88E+04 | 1.37E+05 | 5.49E+04 | 5.89E+04 | 6.17E+04 |
| 1.25E+05 | 1.55E+05 | 1.30E+05 | 1.17E+04 | 2.65E+04 | 5.15E+04 | 1.55E+04 | 1.46E+04 | 1.77E+04 |
| 2.71E+04 | 2.85E+04 | 6.08E+03 | 9.00E+00 | 9.00E+00 | 9.00E+00 | 9.00E+00 | 9.00E+00 | 9.00E+00 |
| 9.00E+00 | 9.00E+00 | 9.00E+00 | 4.01E+04 | 2.49E+04 | 5.34E+04 | 1.69E+04 | 3.57E+04 | 1.44E+04 |
| 2.36E+05 | 3.31E+05 | 1.81E+05 | 8.74E+04 | 1.07E+05 | 4.51E+05 | 8.20E+04 | 1.26E+05 | 6.39E+04 |
| 2.05E+05 | 2.72E+05 | 1.60E+05 | 1.29E+05 | 9.02E+04 | 1.64E+05 | 7.35E+04 | 1.54E+05 | 6.71E+04 |
| 2.10E+04 | 2.02E+04 | 1.14E+04 | 1.04E+05 | 6.40E+04 | 1.25E+05 | 5.54E+04 | 8.44E+04 | 4.85E+04 |
| 1.05E+05 | 1.31E+05 | 8.13E+04 | 9.00E+00 | 9.00E+00 | 9.00E+00 | 9.00E+00 | 9.00E+00 | 9.00E+00 |
| 1.24E+05 | 1.36E+05 | 1.14E+05 | 2.72E+05 | 2.51E+05 | 9.31E+05 | 1.67E+05 | 4.03E+05 | 2.32E+05 |
| 2.46E+04 | 2.45E+04 | 2.09E+04 | 4.59E+04 | 4.54E+04 | 1.56E+05 | 2.62E+04 | 6.91E+04 | 3.62E+04 |
| 6.17E+03 | 6.92E+03 | 6.25E+03 | 1.15E+04 | 1.04E+04 | 2.55E+04 | 1.09E+04 | 1.32E+04 | 9.46E+03 |
| 2.33E+04 | 3.11E+04 | 1.94E+04 | 3.29E+04 | 3.05E+04 | 4.66E+04 | 3.82E+04 | 4.17E+04 | 3.44E+04 |
| 3.62E+05 | 3.29E+05 | 3.14E+05 | 7.96E+05 | 7.06E+05 | 2.25E+06 | 3.54E+05 | 9.93E+05 | 6.45E+05 |
| 2.18E+04 | 2.31E+04 | 1.98E+04 | 5.63E+04 | 4.66E+04 | 1.24E+05 | 2.22E+04 | 5.12E+04 | 3.96E+04 |
| 8.30E+03 | 9.49E+03 | 7.60E+03 | 1.49E+04 | 1.34E+04 | 2.43E+04 | 1.57E+04 | 2.03E+04 | 1.44E+04 |
| 3.38E+05 | 5.44E+05 | 3.39E+05 | 5.17E+05 | 4.86E+05 | 4.48E+05 | 5.07E+05 | 4.76E+05 | 4.17E+05 |
| 1.14E+04 | 8.95E+03 | 9.01E+03 | 1.71E+04 | 6.80E+03 | 1.06E+04 | 3.33E+03 | 4.67E+03 | 3.01E+03 |
| 6.61E+04 | 9.82E+04 | 4.11E+04 | 1.68E+04 | 1.16E+04 | 3.84E+04 | 4.16E+03 | 6.35E+03 | 3.19E+04 |
| 3.04E+06 | 3.14E+06 | 2.71E+06 | 1.17E+05 | 1.06E+05 | 2.47E+05 | 6.91E+04 | 1.31E+05 | 1.64E+05 |
| 1.09E+05 | 1.31E+05 | 1.00E+05 | 1.86E+05 | 1.60E+05 | 1.57E+05 | 1.56E+05 | 4.30E+04 | 2.36E+05 |
| 6.07E+05 | 3.38E+05 | 5.02E+05 | 1.01E+05 | 1.24E+05 | 2.09E+05 | 4.67E+04 | 1.41E+05 | 1.27E+05 |
| 4.60E+06 | 4.40E+06 | 3.95E+06 | 1.11E+06 | 9.57E+05 | 1.90E+06 | 1.14E+06 | 1.28E+06 | 1.13E+06 |
| 3.86E+05 | 5.64E+05 | 3.74E+05 | 3.18E+06 | 3.62E+06 | 2.23E+06 | 3.46E+06 | 4.03E+06 | 3.73E+06 |
| 6.70E+05 | 7.65E+05 | 7.89E+05 | 1.97E+05 | 2.23E+05 | 2.86E+05 | 8.88E+04 | 2.14E+05 | 2.25E+05 |
| 4.23E+05 | 4.70E+05 | 4.09E+05 | 9.00E+00 | 9.00E+00 | 9.00E+00 | 9.00E+00 | 9.00E+00 | 9.00E+00 |
| 1.15E+05 | 1.40E+05 | 1.14E+05 | 1.47E+05 | 1.16E+05 | 2.26E+05 | 2.87E+05 | 1.64E+05 | 1.63E+05 |
| 4.54E+05 | 4.94E+05 | 3.38E+05 | 1.13E+05 | 7.83E+04 | 1.47E+05 | 7.28E+04 | 1.22E+05 | 1.39E+05 |
| 9.21E+05 | 1.50E+06 | 1.82E+06 | 2.13E+06 | 1.81E+06 | 2.97E+06 | 1.32E+06 | 1.69E+06 | 1.79E+06 |
| 1.72E+07 | 1.67E+07 | 1.47E+07 | 4.25E+06 | 3.70E+06 | 3.46E+06 | 2.21E+06 | 3.56E+06 | 3.11E+06 |

|          |          |          |          |          |          |          |          |          |
|----------|----------|----------|----------|----------|----------|----------|----------|----------|
| 4.52E+05 | 7.16E+05 | 4.08E+05 | 4.96E+06 | 4.57E+06 | 4.62E+06 | 3.57E+06 | 5.04E+06 | 4.71E+06 |
| 9.36E+04 | 8.09E+04 | 7.75E+04 | 4.00E+04 | 2.27E+04 | 5.19E+04 | 1.33E+04 | 2.49E+04 | 3.16E+04 |
| 8.79E+03 | 2.12E+04 | 2.32E+04 | 4.32E+04 | 4.92E+04 | 6.60E+04 | 1.73E+05 | 2.10E+04 | 1.78E+05 |
| 9.49E+04 | 8.76E+04 | 8.78E+04 | 9.11E+04 | 7.56E+04 | 6.48E+04 | 7.02E+04 | 6.33E+04 | 7.86E+04 |
| 2.56E+05 | 1.59E+05 | 1.62E+05 | 2.01E+05 | 1.32E+05 | 1.74E+05 | 2.99E+04 | 2.75E+04 | 7.41E+04 |
| 3.57E+04 | 6.13E+03 | 2.30E+04 | 3.36E+04 | 1.78E+04 | 3.82E+04 | 1.75E+03 | 3.59E+04 | 2.90E+04 |
| 9.87E+03 | 7.08E+03 | 5.92E+03 | 1.57E+05 | 1.94E+05 | 2.73E+05 | 1.07E+05 | 2.99E+05 | 2.27E+05 |
| 1.84E+05 | 4.70E+05 | 2.30E+05 | 2.10E+06 | 1.37E+06 | 1.71E+06 | 5.41E+05 | 4.32E+05 | 1.22E+06 |
| 4.37E+04 | 4.46E+04 | 3.73E+04 | 5.00E+03 | 1.07E+04 | 1.08E+04 | 7.17E+03 | 1.23E+04 | 9.67E+03 |
| 4.17E+04 | 4.76E+04 | 4.95E+04 | 1.31E+05 | 1.30E+05 | 4.57E+04 | 5.01E+04 | 1.13E+05 | 9.79E+04 |
| 6.20E+03 | 1.34E+04 | 1.04E+04 | 1.55E+04 | 1.56E+04 | 2.03E+04 | 7.04E+03 | 6.28E+04 | 1.63E+04 |
| 3.04E+06 | 3.37E+06 | 2.53E+06 | 9.97E+06 | 9.60E+06 | 9.48E+06 | 7.42E+06 | 9.89E+06 | 7.54E+06 |
| 1.22E+05 | 1.77E+05 | 1.22E+05 | 2.79E+05 | 2.36E+05 | 2.18E+05 | 4.50E+05 | 2.35E+05 | 2.19E+05 |
| 2.26E+03 | 1.12E+03 | 1.12E+03 | 1.94E+05 | 2.02E+05 | 1.22E+05 | 2.66E+05 | 1.85E+05 | 1.92E+05 |
| 3.19E+04 | 5.38E+04 | 3.69E+04 | 8.70E+04 | 1.83E+04 | 8.22E+04 | 1.20E+05 | 5.16E+04 | 5.92E+04 |
| 1.87E+05 | 2.29E+05 | 1.56E+05 | 2.65E+04 | 1.52E+04 | 4.12E+04 | 2.73E+04 | 2.67E+04 | 3.03E+04 |
| 6.43E+06 | 7.99E+06 | 7.82E+06 | 3.12E+05 | 3.01E+05 | 8.72E+05 | 2.05E+05 | 2.41E+05 | 3.48E+05 |
| 6.15E+05 | 7.32E+05 | 5.47E+05 | 4.22E+05 | 3.57E+05 | 6.81E+05 | 5.41E+05 | 6.10E+05 | 4.32E+05 |
| 2.51E+04 | 3.39E+04 | 2.48E+04 | 1.35E+06 | 1.28E+06 | 1.12E+06 | 1.85E+06 | 2.40E+06 | 1.43E+06 |
| 3.99E+07 | 4.31E+07 | 3.39E+07 | 1.98E+07 | 1.95E+07 | 2.18E+07 | 2.05E+07 | 2.75E+07 | 1.82E+07 |
| 3.36E+04 | 5.19E+04 | 2.86E+04 | 2.31E+05 | 2.19E+05 | 1.74E+05 | 2.98E+05 | 2.59E+05 | 2.23E+05 |
| 2.03E+06 | 2.08E+06 | 2.02E+06 | 1.15E+05 | 1.31E+05 | 1.14E+05 | 9.91E+04 | 1.24E+05 | 1.27E+05 |
| 3.99E+06 | 2.04E+06 | 3.82E+06 | 1.13E+05 | 1.84E+05 | 2.99E+05 | 2.83E+05 | 3.06E+05 | 3.82E+05 |
| 1.66E+04 | 8.24E+04 | 1.07E+05 | 9.18E+05 | 9.53E+05 | 1.14E+06 | 1.15E+06 | 1.17E+06 | 1.37E+06 |
| 1.01E+06 | 9.43E+05 | 1.14E+06 | 9.00E+00 | 9.00E+00 | 9.00E+00 | 9.00E+00 | 1.71E+04 | 9.00E+00 |
| 4.52E+04 | 4.40E+04 | 2.78E+04 | 9.00E+00 | 1.14E+04 | 9.00E+00 | 9.00E+00 | 9.00E+00 | 9.00E+00 |
| 5.10E+04 | 5.02E+04 | 4.12E+04 | 1.73E+05 | 2.86E+05 | 1.62E+05 | 3.80E+05 | 2.82E+05 | 2.81E+05 |
| 3.84E+03 | 3.58E+03 | 2.09E+03 | 1.01E+05 | 1.21E+05 | 9.86E+04 | 7.99E+04 | 1.67E+05 | 8.87E+04 |
| 2.97E+04 | 2.79E+04 | 2.21E+04 | 1.85E+05 | 1.60E+05 | 1.83E+05 | 1.41E+05 | 2.30E+05 | 1.58E+05 |
| 5.03E+04 | 4.01E+04 | 2.65E+04 | 3.50E+06 | 2.73E+06 | 3.09E+06 | 3.71E+06 | 3.39E+06 | 3.50E+06 |
| 7.38E+03 | 1.31E+04 | 1.25E+04 | 1.50E+05 | 1.33E+05 | 1.61E+05 | 1.53E+05 | 1.67E+05 | 1.85E+05 |
| 3.00E+04 | 3.68E+04 | 2.01E+04 | 7.64E+05 | 1.05E+06 | 5.99E+05 | 1.79E+06 | 1.38E+06 | 1.01E+06 |
| 2.40E+04 | 3.56E+04 | 1.82E+04 | 9.77E+05 | 1.20E+06 | 1.02E+06 | 1.46E+06 | 1.30E+06 | 9.65E+05 |
| 1.44E+03 | 2.32E+03 | 1.87E+03 | 4.27E+04 | 5.35E+04 | 4.65E+04 | 1.13E+05 | 1.75E+05 | 7.06E+04 |
| 1.48E+04 | 1.09E+04 | 3.89E+03 | 4.94E+05 | 4.45E+05 | 5.46E+05 | 4.56E+05 | 5.91E+05 | 4.24E+05 |
| 2.26E+04 | 2.81E+04 | 1.27E+04 | 3.72E+05 | 4.13E+05 | 2.82E+05 | 3.55E+05 | 1.18E+05 | 5.73E+05 |
| 1.36E+04 | 1.30E+04 | 1.31E+04 | 1.80E+05 | 1.86E+05 | 1.78E+05 | 2.82E+05 | 4.22E+05 | 2.13E+05 |
| 2.39E+05 | 2.43E+05 | 2.11E+05 | 7.22E+03 | 4.52E+03 | 2.51E+04 | 9.92E+03 | 1.35E+04 | 8.12E+03 |
| 7.17E+04 | 9.21E+04 | 8.30E+04 | 1.61E+05 | 1.56E+05 | 6.75E+04 | 1.02E+05 | 1.15E+05 | 1.54E+05 |
| 4.87E+05 | 3.92E+05 | 2.87E+05 | 2.65E+05 | 2.68E+05 | 6.96E+05 | 2.68E+05 | 2.34E+05 | 3.66E+05 |
| 1.08E+05 | 9.93E+04 | 7.53E+04 | 3.45E+05 | 3.71E+05 | 3.02E+05 | 9.84E+04 | 1.68E+05 | 4.70E+05 |
| 2.84E+04 | 4.15E+04 | 3.59E+04 | 2.05E+05 | 1.87E+05 | 1.33E+05 | 8.12E+04 | 1.23E+05 | 1.84E+05 |
| 2.89E+05 | 4.43E+05 | 4.25E+05 | 1.88E+05 | 1.76E+05 | 2.44E+05 | 1.45E+05 | 1.39E+05 | 1.45E+05 |
| 2.87E+04 | 2.97E+04 | 2.52E+04 | 3.79E+05 | 8.97E+05 | 6.40E+05 | 3.53E+05 | 3.12E+05 | 5.90E+05 |
| 1.46E+04 | 2.54E+04 | 7.59E+03 | 8.54E+04 | 8.38E+04 | 9.74E+04 | 9.31E+03 | 9.80E+04 | 4.71E+04 |
| 1.61E+05 | 1.85E+05 | 1.71E+05 | 1.77E+05 | 2.24E+05 | 1.97E+05 | 1.72E+05 | 2.52E+05 | 2.16E+05 |
| 1.85E+03 | 2.76E+03 | 6.46E+03 | 4.83E+04 | 3.90E+04 | 5.36E+04 | 5.57E+04 | 4.68E+04 | 4.60E+04 |
| 1.02E+04 | 1.52E+04 | 9.00E+00 | 2.21E+04 | 2.96E+04 | 3.21E+04 | 1.52E+04 | 4.28E+04 | 2.59E+04 |
| 1.60E+05 | 1.43E+05 | 1.36E+05 | 1.23E+05 | 1.10E+05 | 1.59E+05 | 3.38E+05 | 2.41E+05 | 1.96E+05 |
| 5.55E+05 | 6.38E+05 | 7.10E+05 | 5.27E+05 | 6.31E+05 | 8.54E+05 | 9.18E+05 | 1.19E+06 | 7.91E+05 |
| 2.62E+06 | 2.63E+06 | 2.62E+06 | 1.07E+06 | 9.93E+05 | 1.11E+06 | 6.56E+05 | 1.16E+06 | 1.11E+06 |
| 4.07E+04 | 4.21E+04 | 3.66E+04 | 3.93E+05 | 3.63E+05 | 3.64E+05 | 1.91E+05 | 3.03E+05 | 3.83E+05 |
| 1.27E+06 | 1.33E+06 | 1.33E+06 | 1.42E+06 | 1.30E+06 | 9.38E+05 | 1.55E+06 | 1.30E+06 | 1.90E+06 |
| 4.79E+03 | 4.23E+03 | 3.44E+03 | 1.82E+05 | 1.53E+05 | 1.46E+05 | 8.31E+04 | 1.01E+05 | 1.14E+05 |

|          |          |          |          |          |          |          |          |          |
|----------|----------|----------|----------|----------|----------|----------|----------|----------|
| 3.92E+04 | 2.53E+04 | 3.05E+04 | 1.72E+04 | 1.50E+04 | 1.22E+04 | 1.89E+04 | 1.26E+04 | 1.79E+04 |
| 2.70E+05 | 1.25E+05 | 2.62E+05 | 8.94E+05 | 8.77E+05 | 7.54E+05 | 8.14E+05 | 7.33E+05 | 7.77E+05 |
| 1.79E+04 | 2.22E+04 | 2.08E+04 | 8.71E+05 | 7.32E+05 | 1.11E+06 | 6.40E+05 | 1.08E+06 | 6.07E+05 |
| 6.50E+03 | 7.36E+03 | 1.64E+03 | 8.27E+04 | 7.14E+04 | 9.40E+04 | 3.57E+04 | 1.01E+05 | 5.67E+04 |
| 2.30E+05 | 2.50E+05 | 2.94E+05 | 5.63E+05 | 5.17E+05 | 8.80E+05 | 5.14E+05 | 7.49E+05 | 4.85E+05 |
| 6.11E+06 | 7.73E+06 | 8.22E+06 | 8.39E+06 | 8.32E+06 | 1.15E+07 | 6.82E+06 | 1.21E+07 | 7.02E+06 |
| 8.98E+04 | 7.99E+04 | 7.40E+04 | 9.84E+04 | 6.54E+04 | 6.96E+04 | 5.72E+04 | 7.36E+04 | 1.07E+05 |
| 5.47E+03 | 6.76E+03 | 5.25E+03 | 5.08E+04 | 5.97E+04 | 5.77E+04 | 5.16E+04 | 7.12E+04 | 5.40E+04 |
| 2.12E+03 | 2.00E+03 | 1.24E+03 | 1.19E+04 | 9.18E+03 | 9.82E+03 | 1.10E+04 | 7.27E+03 | 9.66E+03 |
| 9.45E+03 | 9.51E+03 | 8.68E+03 | 6.41E+03 | 2.52E+03 | 5.32E+03 | 6.35E+03 | 3.49E+03 | 3.70E+03 |
| 2.87E+03 | 2.49E+03 | 2.20E+03 | 1.34E+04 | 8.45E+03 | 1.03E+04 | 7.57E+03 | 8.71E+03 | 9.78E+03 |
| 2.01E+04 | 1.91E+04 | 1.50E+04 | 3.61E+04 | 9.00E+00 | 2.71E+04 | 2.71E+04 | 1.43E+04 | 2.55E+04 |
| 7.59E+03 | 7.48E+03 | 7.18E+03 | 2.36E+04 | 1.29E+04 | 1.63E+04 | 1.78E+04 | 1.08E+04 | 1.49E+04 |
| 4.49E+03 | 4.30E+03 | 5.06E+03 | 8.70E+03 | 8.91E+03 | 1.45E+04 | 6.50E+03 | 9.94E+03 | 6.99E+03 |
| 1.99E+03 | 1.96E+03 | 1.97E+03 | 2.93E+03 | 2.17E+03 | 4.11E+03 | 3.14E+03 | 3.94E+03 | 2.84E+03 |
| 9.00E+00 | 9.00E+00 | 9.00E+00 | 1.22E+03 | 1.33E+03 | 2.21E+03 | 6.45E+02 | 1.68E+03 | 8.97E+02 |
| 6.51E+03 | 9.44E+03 | 8.67E+03 | 1.09E+04 | 9.42E+03 | 1.69E+04 | 8.48E+03 | 1.05E+04 | 9.55E+03 |
| 2.19E+05 | 1.95E+05 | 1.84E+05 | 1.40E+05 | 1.92E+05 | 1.71E+05 | 1.53E+05 | 1.49E+05 | 1.47E+05 |
| 2.33E+04 | 2.31E+04 | 2.23E+04 | 3.95E+04 | 3.42E+04 | 5.32E+04 | 4.05E+04 | 4.29E+04 | 4.09E+04 |
| 7.69E+03 | 1.95E+04 | 1.35E+04 | 1.89E+05 | 1.22E+05 | 1.11E+05 | 1.75E+05 | 1.05E+05 | 2.72E+05 |
| 7.51E+03 | 9.00E+00 | 1.33E+04 | 2.39E+04 | 2.03E+04 | 1.92E+04 | 1.54E+04 | 9.90E+03 | 1.19E+04 |
| 6.78E+04 | 2.74E+04 | 2.19E+04 | 8.92E+04 | 1.27E+05 | 1.50E+05 | 1.00E+05 | 1.43E+05 | 1.34E+05 |
| 3.99E+03 | 6.78E+03 | 5.67E+03 | 2.27E+04 | 1.95E+04 | 2.16E+04 | 1.74E+04 | 1.39E+04 | 2.37E+04 |
| 2.75E+04 | 9.00E+00 | 9.00E+00 | 1.82E+05 | 2.17E+05 | 1.46E+05 | 1.11E+05 | 2.09E+05 | 1.81E+05 |
| 5.36E+04 | 3.44E+04 | 6.37E+04 | 3.25E+04 | 2.83E+04 | 4.77E+04 | 2.94E+04 | 2.54E+04 | 8.18E+03 |
| 1.42E+03 | 2.29E+03 | 2.43E+03 | 7.19E+03 | 1.08E+04 | 1.70E+04 | 3.15E+03 | 1.94E+04 | 3.50E+03 |
| 8.73E+03 | 2.91E+03 | 1.16E+04 | 2.63E+05 | 1.98E+05 | 2.70E+05 | 1.93E+05 | 2.30E+05 | 2.88E+05 |
| 1.67E+05 | 1.44E+05 | 1.30E+05 | 2.83E+04 | 3.25E+04 | 1.21E+05 | 2.95E+04 | 3.98E+04 | 5.38E+04 |
| 1.95E+04 | 3.00E+04 | 2.68E+04 | 1.14E+05 | 9.86E+04 | 1.22E+05 | 2.03E+05 | 1.19E+05 | 1.81E+05 |
| 3.22E+04 | 2.70E+04 | 3.29E+04 | 5.77E+04 | 8.25E+04 | 1.05E+05 | 2.39E+04 | 2.44E+05 | 6.71E+04 |
| 2.01E+05 | 1.78E+05 | 1.71E+05 | 1.05E+06 | 1.09E+06 | 1.00E+06 | 8.31E+05 | 1.41E+06 | 9.38E+05 |
| 4.09E+03 | 4.70E+03 | 1.46E+03 | 3.62E+04 | 3.69E+04 | 5.09E+04 | 3.83E+04 | 6.27E+04 | 3.59E+04 |
| 1.76E+05 | 1.56E+05 | 2.21E+05 | 1.22E+05 | 1.75E+05 | 2.28E+05 | 2.13E+05 | 3.48E+05 | 1.99E+05 |
| 2.10E+04 | 2.25E+04 | 2.02E+04 | 6.49E+04 | 5.43E+04 | 9.77E+04 | 1.00E+05 | 7.11E+04 | 6.84E+04 |
| 1.56E+05 | 1.31E+05 | 1.50E+05 | 1.89E+05 | 1.44E+05 | 1.94E+05 | 1.45E+05 | 1.79E+05 | 1.82E+05 |
| 1.76E+05 | 1.76E+05 | 1.93E+05 | 1.05E+05 | 1.11E+05 | 9.64E+04 | 1.29E+05 | 8.35E+04 | 8.98E+04 |
| 1.18E+04 | 1.09E+04 | 1.11E+04 | 4.83E+04 | 8.16E+04 | 1.10E+05 | 4.53E+04 | 5.87E+04 | 4.29E+04 |
| 2.91E+05 | 3.31E+05 | 3.19E+05 | 1.66E+04 | 5.25E+04 | 1.36E+05 | 2.99E+04 | 4.56E+04 | 7.54E+04 |
| 1.01E+05 | 1.04E+05 | 9.05E+04 | 1.43E+05 | 1.23E+05 | 1.57E+05 | 9.57E+04 | 7.44E+04 | 1.16E+05 |
| 1.52E+06 | 1.58E+06 | 1.28E+06 | 2.57E+06 | 2.24E+06 | 1.89E+06 | 2.87E+06 | 1.98E+06 | 1.87E+06 |
| 9.00E+00 | 9.00E+00 | 9.00E+00 | 2.41E+05 | 2.28E+05 | 2.08E+05 | 7.19E+04 | 2.10E+05 | 1.69E+05 |
| 7.88E+05 | 8.06E+05 | 7.01E+05 | 1.57E+06 | 1.23E+06 | 2.02E+06 | 6.78E+05 | 1.42E+06 | 1.38E+06 |
| 4.30E+03 | 2.45E+03 | 2.87E+03 | 2.21E+04 | 1.80E+04 | 3.04E+04 | 2.63E+03 | 1.38E+04 | 1.14E+04 |
| 3.51E+04 | 2.63E+04 | 2.74E+04 | 3.32E+04 | 3.24E+04 | 4.84E+04 | 1.74E+04 | 2.98E+04 | 4.44E+04 |
| 2.09E+04 | 2.83E+04 | 2.26E+04 | 2.87E+04 | 2.34E+04 | 5.43E+04 | 3.17E+04 | 2.59E+04 | 3.70E+04 |
| 3.73E+05 | 3.45E+05 | 3.16E+05 | 4.00E+04 | 4.83E+04 | 5.59E+04 | 3.78E+04 | 5.88E+04 | 6.91E+04 |
| 1.51E+04 | 2.43E+04 | 1.95E+04 | 3.44E+04 | 8.14E+03 | 1.22E+04 | 1.14E+04 | 1.01E+04 | 8.04E+03 |
| 1.95E+05 | 1.44E+05 | 1.36E+05 | 4.33E+05 | 4.48E+05 | 3.49E+05 | 2.71E+05 | 3.56E+05 | 3.70E+05 |
| 3.70E+05 | 3.52E+05 | 3.76E+05 | 1.41E+05 | 1.29E+05 | 9.52E+04 | 1.48E+05 | 1.19E+05 | 2.13E+05 |
| 3.58E+03 | 6.18E+03 | 2.71E+03 | 4.20E+04 | 5.65E+04 | 4.51E+04 | 6.16E+04 | 5.74E+04 | 3.92E+04 |
| 3.99E+04 | 5.12E+04 | 5.11E+04 | 2.02E+05 | 2.53E+05 | 2.77E+05 | 3.65E+05 | 2.54E+05 | 3.89E+05 |
| 3.76E+03 | 6.34E+03 | 7.42E+03 | 5.00E+03 | 5.78E+03 | 9.83E+03 | 6.60E+03 | 5.91E+03 | 5.92E+03 |
| 1.02E+04 | 1.14E+04 | 1.04E+04 | 1.24E+04 | 1.03E+04 | 1.55E+04 | 7.85E+03 | 9.92E+03 | 9.99E+03 |
| 9.00E+00 | 5.55E+04 | 9.00E+00 | 2.27E+04 | 9.15E+04 | 1.15E+05 | 4.59E+04 | 9.82E+04 | 5.58E+04 |

|          |          |          |          |          |          |          |          |          |
|----------|----------|----------|----------|----------|----------|----------|----------|----------|
| 3.96E+05 | 4.34E+05 | 3.50E+05 | 9.45E+04 | 1.04E+05 | 3.13E+05 | 8.55E+04 | 1.10E+05 | 1.15E+05 |
| 1.41E+05 | 8.86E+04 | 8.92E+04 | 7.69E+05 | 7.97E+05 | 1.19E+06 | 6.15E+05 | 9.60E+05 | 1.12E+06 |
| 1.22E+06 | 1.34E+06 | 1.06E+06 | 4.27E+06 | 2.88E+06 | 4.18E+06 | 4.60E+06 | 3.78E+06 | 4.05E+06 |
| 6.58E+05 | 6.06E+05 | 5.19E+05 | 5.08E+05 | 6.05E+05 | 6.24E+05 | 4.83E+05 | 7.08E+05 | 1.75E+05 |
| 5.15E+04 | 6.55E+04 | 4.52E+04 | 1.87E+05 | 1.74E+05 | 1.75E+05 | 2.43E+05 | 2.06E+05 | 1.60E+05 |
| 3.34E+04 | 3.40E+04 | 2.26E+04 | 9.00E+00 | 9.00E+00 | 3.93E+03 | 1.04E+03 | 9.00E+00 | 9.00E+00 |
| 3.02E+06 | 2.59E+06 | 2.37E+06 | 1.64E+06 | 1.40E+06 | 1.72E+06 | 4.75E+05 | 1.32E+06 | 1.30E+06 |
| 1.45E+07 | 1.52E+07 | 1.48E+07 | 9.84E+06 | 8.52E+06 | 1.08E+07 | 8.96E+06 | 1.05E+07 | 8.60E+06 |
| 1.10E+04 | 1.36E+04 | 3.43E+03 | 1.39E+05 | 1.34E+05 | 1.93E+05 | 4.90E+04 | 7.84E+04 | 9.45E+04 |
| 6.64E+04 | 8.57E+04 | 4.61E+04 | 1.30E+05 | 1.07E+05 | 2.71E+05 | 8.33E+04 | 1.68E+05 | 1.02E+05 |
| 2.99E+03 | 1.40E+04 | 6.04E+03 | 3.98E+04 | 4.00E+04 | 7.99E+04 | 3.19E+04 | 5.89E+04 | 2.81E+04 |
| 3.80E+04 | 6.81E+04 | 3.47E+04 | 1.16E+05 | 1.16E+05 | 1.46E+05 | 8.16E+04 | 9.71E+04 | 1.21E+05 |
| 1.88E+05 | 1.67E+05 | 1.20E+05 | 1.14E+05 | 7.59E+04 | 2.06E+05 | 9.79E+04 | 9.47E+04 | 1.37E+05 |
| 9.00E+00 | 9.00E+00 | 9.00E+00 | 4.88E+05 | 3.93E+05 | 5.24E+05 | 4.33E+05 | 5.62E+05 | 6.37E+05 |
| 1.34E+06 | 1.59E+06 | 1.43E+06 | 1.82E+06 | 1.66E+06 | 1.66E+06 | 1.25E+06 | 1.84E+06 | 2.17E+06 |
| 6.18E+03 | 6.75E+03 | 4.07E+03 | 5.06E+04 | 4.13E+04 | 6.01E+04 | 2.37E+04 | 4.40E+04 | 4.60E+04 |
| 2.03E+04 | 2.88E+04 | 1.53E+04 | 5.84E+04 | 5.22E+04 | 6.23E+04 | 5.60E+04 | 5.14E+04 | 7.40E+04 |
| 1.24E+04 | 5.86E+03 | 7.22E+03 | 5.58E+05 | 4.27E+05 | 5.46E+05 | 3.64E+05 | 6.39E+05 | 6.66E+05 |
| 7.11E+03 | 9.29E+03 | 1.25E+04 | 1.92E+04 | 2.35E+04 | 2.55E+04 | 1.34E+04 | 2.39E+04 | 3.27E+04 |
| 9.00E+00 | 9.00E+00 | 9.00E+00 | 4.84E+04 | 4.76E+04 | 4.93E+04 | 1.47E+05 | 6.30E+04 | 4.42E+04 |
| 4.88E+03 | 3.11E+03 | 5.51E+03 | 4.38E+04 | 3.28E+04 | 2.53E+04 | 6.30E+04 | 4.17E+04 | 3.09E+04 |
| 2.56E+04 | 3.00E+04 | 2.53E+04 | 6.13E+04 | 5.44E+04 | 7.00E+04 | 6.96E+04 | 4.23E+04 | 6.21E+04 |
| 5.10E+04 | 5.45E+04 | 1.59E+04 | 1.94E+05 | 1.76E+05 | 1.08E+05 | 6.54E+04 | 9.93E+04 | 1.49E+05 |
| 1.48E+04 | 1.18E+04 | 3.98E+03 | 2.62E+04 | 4.52E+04 | 7.07E+04 | 4.80E+04 | 8.35E+04 | 6.53E+04 |
| 3.72E+05 | 3.55E+05 | 3.16E+05 | 5.47E+05 | 5.15E+05 | 2.49E+05 | 5.83E+05 | 4.39E+05 | 4.42E+05 |
| 9.00E+00 | 5.48E+04 | 4.01E+04 | 9.34E+05 | 6.97E+05 | 6.52E+05 | 4.13E+05 | 1.04E+06 | 7.42E+05 |
| 9.00E+00 | 9.00E+00 | 9.00E+00 | 7.41E+04 | 6.53E+04 | 2.44E+04 | 1.36E+04 | 9.14E+04 | 9.39E+04 |
| 5.06E+04 | 5.19E+04 | 4.29E+04 | 1.58E+04 | 1.31E+04 | 1.49E+04 | 5.26E+03 | 1.27E+04 | 1.69E+04 |
| 5.79E+05 | 6.81E+05 | 5.57E+05 | 7.88E+05 | 7.56E+05 | 8.48E+05 | 4.71E+05 | 7.93E+05 | 9.22E+05 |
| 4.03E+04 | 4.03E+04 | 3.68E+04 | 1.62E+04 | 9.16E+03 | 2.53E+04 | 9.09E+03 | 3.02E+03 | 2.75E+04 |
| 3.54E+04 | 3.61E+04 | 3.56E+04 | 2.48E+04 | 2.50E+04 | 3.50E+04 | 2.07E+04 | 3.37E+04 | 2.33E+04 |
| 3.89E+04 | 2.04E+04 | 2.34E+04 | 2.34E+04 | 2.89E+04 | 3.26E+04 | 2.45E+04 | 3.28E+04 | 2.28E+04 |
| 1.40E+05 | 3.67E+05 | 2.57E+05 | 9.00E+00 | 9.00E+00 | 9.00E+00 | 9.00E+00 | 1.47E+03 | 9.00E+00 |
| 1.95E+05 | 2.03E+05 | 1.56E+05 | 9.00E+00 | 9.00E+00 | 9.00E+00 | 9.00E+00 | 9.00E+00 | 9.00E+00 |
| 3.01E+04 | 9.00E+00 | 9.00E+00 | 7.72E+05 | 8.44E+05 | 1.04E+06 | 3.34E+05 | 9.03E+05 | 4.81E+05 |
| 6.38E+04 | 1.11E+05 | 9.37E+04 | 9.00E+00 | 9.00E+00 | 9.00E+00 | 9.00E+00 | 1.88E+03 | 9.00E+00 |
| 1.83E+04 | 1.33E+04 | 9.99E+03 | 7.55E+03 | 6.78E+03 | 1.65E+04 | 1.10E+04 | 1.40E+04 | 1.59E+04 |
| 3.18E+03 | 3.59E+03 | 3.33E+03 | 6.12E+03 | 6.65E+03 | 1.82E+04 | 2.12E+03 | 9.41E+03 | 5.95E+03 |
| 2.95E+03 | 5.10E+03 | 4.34E+03 | 8.10E+03 | 6.59E+03 | 8.77E+03 | 6.04E+03 | 6.03E+03 | 7.28E+03 |
| 7.52E+04 | 8.44E+04 | 8.41E+04 | 1.85E+05 | 1.78E+05 | 5.93E+05 | 8.78E+04 | 2.39E+05 | 1.47E+05 |
| 7.63E+03 | 6.63E+03 | 7.52E+03 | 1.27E+04 | 1.31E+04 | 1.39E+04 | 1.01E+04 | 1.37E+04 | 1.28E+04 |
| 1.20E+04 | 9.61E+03 | 1.24E+04 | 3.14E+04 | 1.77E+04 | 2.12E+04 | 2.16E+04 | 1.33E+04 | 2.44E+04 |
| 2.68E+04 | 1.58E+04 | 1.63E+04 | 1.37E+04 | 1.74E+04 | 2.03E+04 | 2.73E+03 | 8.63E+03 | 1.03E+04 |
| 5.50E+04 | 7.50E+04 | 6.22E+04 | 3.28E+04 | 2.71E+04 | 5.16E+04 | 1.64E+04 | 2.99E+04 | 3.03E+04 |
| 9.27E+04 | 8.02E+04 | 5.96E+04 | 4.20E+04 | 8.84E+04 | 1.19E+05 | 1.12E+05 | 9.16E+04 | 1.26E+05 |
| 1.23E+04 | 4.64E+03 | 6.09E+03 | 2.67E+05 | 1.96E+05 | 2.16E+05 | 3.56E+05 | 1.78E+05 | 2.76E+05 |
| 3.60E+04 | 1.07E+05 | 5.55E+04 | 1.25E+06 | 1.60E+06 | 1.85E+06 | 1.11E+06 | 2.33E+06 | 1.10E+06 |
| 4.11E+04 | 3.19E+04 | 3.89E+04 | 1.64E+05 | 1.25E+05 | 1.54E+05 | 1.38E+05 | 1.74E+05 | 1.10E+05 |
| 2.62E+05 | 3.66E+04 | 2.23E+05 | 2.74E+05 | 4.79E+05 | 8.77E+04 | 2.43E+05 | 8.15E+04 | 2.28E+05 |
| 2.43E+05 | 2.13E+05 | 1.77E+05 | 9.90E+04 | 2.20E+04 | 1.06E+05 | 1.20E+05 | 1.14E+05 | 2.01E+04 |
| 6.29E+04 | 5.86E+04 | 4.11E+04 | 6.05E+04 | 1.10E+05 | 9.13E+04 | 1.52E+05 | 8.57E+04 | 7.26E+04 |
| 1.16E+05 | 1.04E+05 | 1.10E+05 | 4.32E+03 | 9.00E+00 | 9.00E+00 | 9.00E+00 | 8.58E+03 | 9.00E+00 |
| 9.00E+00 | 9.00E+00 | 9.00E+00 | 1.74E+05 | 3.23E+05 | 5.05E+04 | 2.31E+05 | 2.63E+05 | 1.39E+05 |
| 2.68E+06 | 2.54E+06 | 2.26E+06 | 8.47E+05 | 6.40E+05 | 8.80E+05 | 6.94E+05 | 8.55E+05 | 6.60E+05 |

|          |          |          |          |          |          |          |          |          |
|----------|----------|----------|----------|----------|----------|----------|----------|----------|
| 2.01E+06 | 1.79E+06 | 1.72E+06 | 3.72E+04 | 1.50E+04 | 7.46E+04 | 1.80E+04 | 2.00E+04 | 3.13E+04 |
| 3.03E+06 | 2.04E+06 | 2.86E+06 | 7.08E+05 | 6.71E+05 | 8.87E+05 | 1.52E+05 | 5.98E+05 | 6.20E+05 |
| 4.28E+05 | 4.66E+05 | 3.73E+05 | 9.00E+00 | 9.00E+00 | 9.00E+00 | 9.00E+00 | 9.00E+00 | 9.00E+00 |
| 2.97E+04 | 2.55E+04 | 3.77E+04 | 5.59E+04 | 3.82E+04 | 7.55E+04 | 2.80E+04 | 7.90E+04 | 7.00E+04 |
| 5.55E+03 | 7.00E+03 | 4.11E+03 | 3.99E+04 | 2.65E+04 | 4.02E+04 | 9.00E+00 | 4.04E+04 | 1.84E+04 |
| 2.06E+06 | 1.95E+06 | 2.13E+06 | 1.77E+07 | 1.69E+07 | 1.61E+07 | 1.58E+07 | 1.83E+07 | 1.80E+07 |
| 6.31E+05 | 6.59E+05 | 6.29E+05 | 7.09E+05 | 5.77E+05 | 7.70E+05 | 6.32E+05 | 6.99E+05 | 6.44E+05 |
| 1.38E+04 | 1.91E+04 | 1.67E+04 | 7.81E+04 | 9.71E+04 | 7.05E+04 | 1.20E+04 | 8.57E+04 | 5.16E+04 |
| 3.77E+05 | 5.02E+05 | 3.74E+05 | 7.49E+05 | 7.84E+05 | 6.92E+05 | 1.29E+06 | 6.72E+05 | 7.60E+05 |
| 1.19E+06 | 9.94E+05 | 1.08E+06 | 9.00E+00 | 9.00E+00 | 1.24E+05 | 9.00E+00 | 8.17E+04 | 9.00E+00 |
| 4.86E+05 | 5.24E+05 | 4.17E+05 | 2.92E+05 | 2.71E+05 | 2.48E+05 | 3.23E+05 | 2.56E+05 | 3.21E+05 |
| 1.52E+04 | 1.24E+04 | 6.47E+03 | 9.30E+05 | 9.40E+05 | 8.39E+05 | 1.30E+06 | 1.01E+06 | 1.11E+06 |
| 1.72E+04 | 9.00E+00 | 9.00E+00 | 2.41E+05 | 3.43E+05 | 2.32E+05 | 5.57E+05 | 4.48E+05 | 3.46E+05 |
| 5.61E+03 | 4.96E+03 | 5.25E+03 | 6.20E+04 | 6.90E+04 | 7.57E+04 | 1.11E+05 | 1.65E+05 | 9.57E+04 |
| 5.17E+04 | 2.10E+05 | 1.81E+05 | 5.53E+06 | 6.44E+06 | 4.63E+06 | 6.33E+06 | 6.11E+06 | 7.71E+06 |
| 1.03E+07 | 1.04E+07 | 8.18E+06 | 3.30E+05 | 5.03E+05 | 9.03E+05 | 3.22E+05 | 4.24E+05 | 4.30E+05 |
| 1.10E+05 | 8.77E+04 | 8.79E+04 | 9.00E+00 | 9.00E+00 | 9.00E+00 | 9.00E+00 | 9.00E+00 | 9.00E+00 |
| 6.11E+05 | 6.84E+05 | 9.63E+04 | 1.81E+05 | 2.05E+05 | 1.89E+05 | 1.22E+05 | 2.73E+05 | 1.73E+05 |
| 1.12E+08 | 1.34E+08 | 1.03E+08 | 7.30E+07 | 5.50E+07 | 6.74E+07 | 6.22E+07 | 9.27E+07 | 5.01E+07 |
| 8.75E+06 | 5.99E+06 | 6.87E+06 | 1.53E+05 | 2.09E+05 | 8.24E+05 | 1.11E+05 | 3.13E+05 | 1.85E+05 |
| 2.13E+05 | 1.73E+05 | 1.37E+05 | 2.05E+05 | 2.26E+05 | 5.00E+05 | 3.28E+05 | 2.34E+05 | 3.26E+05 |
| 7.73E+04 | 9.60E+04 | 8.03E+04 | 9.23E+04 | 9.17E+04 | 1.07E+05 | 9.49E+04 | 1.36E+05 | 8.63E+04 |
| 1.00E+05 | 1.24E+05 | 7.93E+04 | 6.21E+04 | 4.72E+04 | 5.90E+04 | 3.75E+04 | 5.29E+04 | 4.45E+04 |
| 1.90E+05 | 1.19E+05 | 7.39E+04 | 1.68E+05 | 1.88E+05 | 2.10E+05 | 1.35E+05 | 2.08E+05 | 1.93E+05 |
| 4.38E+05 | 5.21E+05 | 4.76E+05 | 9.00E+00 | 3.27E+04 | 5.76E+04 | 9.00E+00 | 9.00E+00 | 9.00E+00 |
| 6.73E+05 | 6.72E+05 | 5.18E+05 | 1.62E+05 | 1.70E+05 | 3.75E+05 | 1.64E+05 | 2.05E+05 | 1.64E+05 |
| 2.41E+06 | 2.15E+06 | 2.11E+06 | 8.87E+05 | 7.37E+05 | 1.27E+06 | 7.19E+05 | 1.06E+06 | 9.78E+05 |
| 9.00E+00 | 9.00E+00 | 9.00E+00 | 1.41E+05 | 1.67E+05 | 1.69E+05 | 5.48E+04 | 1.38E+05 | 8.48E+04 |
| 2.97E+07 | 3.80E+07 | 5.27E+07 | 5.49E+06 | 4.00E+06 | 7.95E+06 | 7.26E+06 | 5.74E+06 | 5.12E+06 |
| 7.47E+06 | 7.05E+06 | 7.22E+06 | 2.80E+04 | 2.30E+04 | 1.27E+05 | 2.20E+04 | 2.22E+04 | 2.32E+04 |
| 7.66E+04 | 5.85E+04 | 6.29E+04 | 1.52E+04 | 9.00E+00 | 1.97E+04 | 9.00E+00 | 9.00E+00 | 9.00E+00 |
| 3.14E+05 | 2.93E+05 | 2.39E+05 | 9.70E+04 | 1.25E+05 | 9.50E+04 | 1.03E+05 | 1.08E+05 | 1.07E+05 |
| 4.20E+05 | 4.07E+05 | 3.42E+05 | 9.00E+00 | 9.00E+00 | 9.00E+00 | 9.00E+00 | 9.00E+00 | 9.00E+00 |
| 8.27E+05 | 9.12E+05 | 9.79E+05 | 5.56E+05 | 5.57E+05 | 5.99E+05 | 4.81E+05 | 5.39E+05 | 6.21E+05 |
| 1.37E+04 | 5.28E+04 | 1.55E+04 | 3.66E+05 | 3.57E+05 | 2.72E+05 | 3.24E+05 | 3.77E+05 | 3.78E+05 |
| 1.50E+05 | 1.68E+05 | 1.27E+05 | 9.00E+00 | 9.00E+00 | 9.00E+00 | 1.07E+04 | 9.00E+00 | 9.00E+00 |
| 1.52E+05 | 2.14E+05 | 1.82E+05 | 9.00E+00 | 9.00E+00 | 6.02E+04 | 9.00E+00 | 9.00E+00 | 4.54E+04 |
| 9.00E+00 | 9.00E+00 | 9.00E+00 | 1.06E+05 | 1.09E+05 | 1.20E+05 | 1.20E+05 | 1.86E+05 | 1.37E+05 |
| 1.19E+06 | 1.13E+06 | 1.02E+06 | 1.13E+05 | 1.02E+05 | 1.72E+05 | 1.37E+05 | 1.18E+05 | 1.65E+05 |
| 7.16E+04 | 6.81E+04 | 6.46E+04 | 8.17E+03 | 1.09E+04 | 4.88E+04 | 8.48E+03 | 1.60E+04 | 1.61E+04 |
| 3.05E+04 | 2.50E+04 | 1.87E+04 | 1.32E+06 | 1.35E+06 | 1.07E+06 | 1.11E+06 | 1.36E+06 | 1.16E+06 |
| 2.05E+03 | 1.02E+03 | 2.02E+03 | 5.44E+04 | 3.55E+04 | 5.22E+04 | 3.55E+04 | 3.69E+04 | 3.98E+04 |
| 1.14E+04 | 4.23E+04 | 4.51E+04 | 9.31E+05 | 8.42E+05 | 6.99E+05 | 8.64E+05 | 1.03E+06 | 9.71E+05 |
| 9.00E+00 | 3.62E+03 | 9.00E+00 | 2.86E+05 | 3.44E+05 | 3.64E+05 | 8.76E+05 | 8.32E+05 | 4.42E+05 |
| 4.51E+03 | 8.11E+03 | 4.59E+03 | 1.44E+05 | 1.40E+05 | 2.12E+05 | 4.96E+04 | 1.35E+05 | 9.64E+04 |
| 3.00E+05 | 2.79E+05 | 2.37E+05 | 2.35E+05 | 4.41E+05 | 4.53E+05 | 1.63E+05 | 2.68E+05 | 2.08E+05 |
| 4.01E+04 | 4.52E+04 | 3.83E+04 | 1.29E+05 | 1.60E+05 | 1.14E+05 | 3.93E+04 | 1.61E+05 | 9.87E+04 |
| 6.81E+04 | 7.27E+04 | 8.97E+04 | 1.53E+05 | 1.84E+05 | 2.07E+05 | 7.23E+03 | 1.57E+05 | 1.73E+05 |
| 3.70E+05 | 2.86E+05 | 6.76E+05 | 9.42E+05 | 8.12E+05 | 8.65E+05 | 3.17E+05 | 8.78E+05 | 1.01E+06 |
| 1.62E+04 | 1.35E+04 | 8.21E+03 | 2.47E+05 | 3.39E+05 | 2.52E+05 | 2.88E+05 | 3.12E+05 | 2.50E+05 |
| 9.00E+00 | 9.00E+00 | 9.00E+00 | 1.25E+05 | 8.88E+04 | 6.44E+04 | 3.61E+04 | 1.09E+05 | 9.32E+04 |
| 2.01E+05 | 2.28E+05 | 2.41E+05 | 8.08E+04 | 1.10E+05 | 1.05E+05 | 1.31E+05 | 4.93E+04 | 1.28E+05 |
| 9.00E+00 | 9.00E+00 | 9.00E+00 | 8.17E+04 | 7.97E+04 | 6.80E+04 | 1.23E+04 | 4.44E+04 | 5.34E+04 |
| 9.00E+00 | 9.00E+00 | 9.00E+00 | 1.16E+05 | 9.76E+04 | 8.50E+04 | 7.17E+04 | 4.31E+04 | 6.17E+04 |



|          |          |          |          |          |          |          |          |          |          |
|----------|----------|----------|----------|----------|----------|----------|----------|----------|----------|
| 7.34E+04 | 8.01E+04 | 9.56E+04 | 9.00E+00 | 9.00E+00 | 9.00E+00 | 9.00E+00 | 9.00E+00 | 9.00E+00 | 5.75E+04 |
| 4.12E+04 | 5.51E+04 | 5.80E+04 | 9.00E+00 | 9.00E+00 | 9.00E+00 | 9.08E+04 | 9.00E+00 | 9.00E+00 | 9.00E+00 |
| 1.37E+06 | 1.73E+06 | 1.51E+06 | 1.73E+05 | 1.52E+05 | 3.30E+05 | 1.70E+05 | 1.98E+05 | 1.59E+05 | 1.59E+05 |
| 4.23E+04 | 5.43E+04 | 2.89E+04 | 1.75E+05 | 2.24E+05 | 1.90E+05 | 9.70E+04 | 1.70E+05 | 1.83E+05 | 1.83E+05 |
| 6.44E+05 | 6.77E+05 | 5.64E+05 | 4.80E+05 | 4.54E+05 | 4.53E+05 | 4.98E+05 | 5.78E+05 | 5.63E+05 | 5.63E+05 |
| 1.22E+04 | 1.03E+04 | 7.56E+03 | 9.80E+04 | 1.14E+05 | 1.38E+05 | 3.76E+04 | 1.39E+05 | 6.39E+04 | 6.39E+04 |
| 1.17E+05 | 1.28E+05 | 1.32E+05 | 8.99E+04 | 9.09E+04 | 8.98E+04 | 1.30E+05 | 9.92E+04 | 1.26E+05 | 1.26E+05 |
| 9.57E+03 | 3.36E+04 | 1.89E+04 | 1.66E+05 | 1.75E+05 | 1.55E+05 | 2.57E+05 | 2.67E+05 | 2.24E+05 | 2.24E+05 |
| 5.72E+04 | 5.72E+04 | 5.55E+04 | 1.23E+05 | 9.98E+04 | 8.33E+04 | 6.25E+04 | 9.82E+04 | 1.18E+05 | 1.18E+05 |
| 1.64E+04 | 1.15E+04 | 1.38E+04 | 6.94E+05 | 6.07E+05 | 7.81E+05 | 5.95E+05 | 1.05E+06 | 7.18E+05 | 7.18E+05 |
| 2.12E+03 | 2.12E+03 | 2.09E+03 | 1.91E+05 | 1.92E+05 | 1.55E+05 | 1.71E+05 | 1.86E+05 | 2.79E+05 | 2.79E+05 |
| 7.23E+05 | 6.99E+05 | 7.83E+05 | 9.69E+05 | 9.39E+05 | 8.15E+05 | 7.96E+05 | 7.92E+05 | 8.47E+05 | 8.47E+05 |
| 8.30E+03 | 1.30E+04 | 1.03E+04 | 4.28E+05 | 3.94E+05 | 4.03E+05 | 1.42E+05 | 3.31E+05 | 3.11E+05 | 3.11E+05 |
| 5.99E+05 | 4.96E+05 | 5.78E+05 | 1.75E+06 | 1.45E+06 | 1.15E+06 | 1.30E+06 | 1.34E+06 | 1.32E+06 | 1.32E+06 |
| 2.42E+05 | 3.34E+05 | 2.62E+05 | 2.57E+05 | 2.87E+05 | 2.57E+05 | 2.22E+05 | 3.06E+05 | 2.49E+05 | 2.49E+05 |
| 1.15E+06 | 1.03E+06 | 8.35E+05 | 3.81E+04 | 4.22E+04 | 9.12E+04 | 7.03E+04 | 5.16E+04 | 4.13E+04 | 4.13E+04 |
| 9.00E+00 | 9.00E+00 | 9.00E+00 | 2.74E+04 | 3.47E+04 | 2.55E+04 | 1.69E+04 | 4.74E+04 | 3.12E+04 | 3.12E+04 |
| 9.00E+00 | 9.00E+00 | 9.00E+00 | 5.45E+04 | 5.05E+04 | 3.72E+04 | 4.26E+04 | 4.71E+04 | 5.20E+04 | 5.20E+04 |
| 9.00E+00 | 9.00E+00 | 9.00E+00 | 2.15E+04 | 3.35E+04 | 7.56E+03 | 2.44E+04 | 1.90E+04 | 2.39E+04 | 2.39E+04 |
| 9.28E+06 | 1.05E+07 | 1.22E+07 | 9.21E+04 | 3.14E+04 | 8.83E+04 | 8.64E+04 | 7.95E+04 | 1.70E+04 | 1.70E+04 |
| 7.96E+06 | 9.17E+06 | 6.78E+06 | 1.54E+06 | 1.66E+06 | 1.64E+06 | 1.49E+06 | 2.00E+06 | 1.24E+06 | 1.24E+06 |
| 3.87E+04 | 6.85E+04 | 3.83E+04 | 1.13E+05 | 1.26E+05 | 1.05E+05 | 6.45E+04 | 1.40E+05 | 5.66E+04 | 5.66E+04 |
| 1.16E+05 | 9.49E+04 | 1.02E+05 | 3.96E+05 | 5.62E+05 | 6.11E+05 | 3.58E+05 | 5.00E+05 | 2.38E+05 | 2.38E+05 |
| 2.43E+07 | 3.08E+07 | 2.43E+07 | 5.69E+06 | 5.14E+06 | 7.70E+06 | 4.77E+06 | 7.43E+06 | 1.66E+06 | 1.66E+06 |
| 9.00E+00 | 9.00E+00 | 9.00E+00 | 9.95E+05 | 9.18E+05 | 1.24E+06 | 6.10E+05 | 1.08E+06 | 3.67E+05 | 3.67E+05 |
| 7.14E+05 | 7.78E+05 | 5.99E+05 | 2.54E+06 | 2.35E+06 | 2.92E+06 | 1.35E+06 | 2.57E+06 | 1.22E+06 | 1.22E+06 |
| 1.72E+04 | 2.21E+04 | 1.79E+04 | 4.90E+04 | 3.68E+04 | 4.06E+04 | 2.52E+04 | 2.62E+04 | 2.84E+04 | 2.84E+04 |
| 5.72E+03 | 1.15E+04 | 9.32E+03 | 3.75E+04 | 6.89E+04 | 1.64E+04 | 3.19E+04 | 3.69E+04 | 4.08E+04 | 4.08E+04 |
| 3.33E+05 | 4.71E+05 | 3.08E+05 | 1.63E+07 | 1.75E+07 | 1.51E+07 | 2.19E+07 | 1.58E+07 | 1.51E+07 | 1.51E+07 |
| 7.33E+05 | 8.71E+05 | 5.71E+05 | 4.99E+06 | 4.46E+06 | 5.94E+06 | 7.37E+06 | 6.25E+06 | 6.19E+06 | 6.19E+06 |
| 9.15E+03 | 1.45E+04 | 1.10E+04 | 7.01E+04 | 9.48E+04 | 1.16E+05 | 1.26E+05 | 8.89E+04 | 7.60E+04 | 7.60E+04 |
| 9.67E+06 | 1.02E+07 | 8.22E+06 | 8.67E+06 | 8.51E+06 | 1.01E+07 | 2.08E+07 | 1.04E+07 | 7.84E+06 | 7.84E+06 |
| 5.87E+04 | 6.81E+04 | 4.52E+04 | 1.71E+05 | 1.26E+05 | 2.73E+05 | 4.00E+05 | 1.65E+05 | 1.68E+05 | 1.68E+05 |
| 6.16E+06 | 6.90E+06 | 5.61E+06 | 7.41E+05 | 6.68E+05 | 1.18E+06 | 9.13E+05 | 7.94E+05 | 5.30E+05 | 5.30E+05 |
| 7.59E+05 | 9.32E+05 | 7.77E+05 | 3.74E+04 | 2.46E+04 | 5.43E+04 | 3.12E+04 | 3.61E+04 | 1.82E+04 | 1.82E+04 |
| 1.67E+07 | 1.89E+07 | 1.43E+07 | 6.95E+06 | 5.90E+06 | 8.96E+06 | 7.75E+06 | 8.46E+06 | 4.83E+06 | 4.83E+06 |
| 7.18E+04 | 7.47E+04 | 5.63E+04 | 2.00E+05 | 2.41E+05 | 2.37E+05 | 1.75E+05 | 1.85E+05 | 1.83E+05 | 1.83E+05 |
| 7.60E+05 | 9.32E+05 | 6.87E+05 | 5.11E+05 | 4.39E+05 | 8.92E+05 | 4.09E+05 | 5.97E+05 | 3.07E+05 | 3.07E+05 |
| 3.53E+06 | 4.00E+06 | 1.91E+06 | 9.85E+05 | 1.02E+06 | 2.41E+06 | 1.15E+06 | 8.87E+05 | 7.84E+05 | 7.84E+05 |
| 5.06E+06 | 6.13E+06 | 4.24E+06 | 8.47E+06 | 3.14E+06 | 3.58E+06 | 8.66E+06 | 8.81E+06 | 5.36E+06 | 5.36E+06 |
| 6.63E+06 | 6.28E+06 | 5.05E+06 | 5.74E+05 | 7.40E+05 | 1.04E+06 | 3.73E+05 | 7.55E+05 | 5.96E+05 | 5.96E+05 |
| 7.12E+04 | 9.73E+04 | 8.05E+04 | 1.55E+06 | 1.33E+06 | 1.65E+06 | 1.44E+06 | 1.65E+06 | 9.42E+05 | 9.42E+05 |
| 3.09E+06 | 5.25E+06 | 1.37E+06 | 3.44E+06 | 3.32E+06 | 5.13E+06 | 4.54E+06 | 2.75E+06 | 2.33E+06 | 2.33E+06 |
| 2.23E+06 | 2.65E+06 | 1.94E+06 | 4.16E+07 | 3.81E+07 | 3.51E+07 | 4.39E+07 | 4.03E+07 | 2.91E+07 | 2.91E+07 |
| 3.51E+05 | 3.84E+05 | 2.60E+05 | 2.81E+06 | 2.79E+06 | 3.02E+06 | 3.68E+06 | 2.28E+06 | 1.87E+06 | 1.87E+06 |
| 5.30E+04 | 7.32E+04 | 4.69E+04 | 1.03E+06 | 8.47E+05 | 1.14E+06 | 1.04E+06 | 1.17E+06 | 6.64E+05 | 6.64E+05 |
| 6.95E+05 | 7.66E+05 | 4.71E+05 | 3.74E+06 | 3.39E+06 | 3.76E+06 | 3.35E+06 | 4.05E+06 | 3.76E+06 | 3.76E+06 |
| 1.53E+05 | 1.81E+05 | 1.45E+05 | 4.93E+06 | 4.28E+06 | 3.35E+06 | 4.89E+06 | 3.28E+06 | 3.90E+06 | 3.90E+06 |
| 7.81E+05 | 8.57E+05 | 6.23E+05 | 2.42E+06 | 3.01E+06 | 1.71E+06 | 2.49E+06 | 1.98E+06 | 1.64E+06 | 1.64E+06 |
| 4.80E+04 | 3.57E+04 | 2.75E+04 | 3.84E+05 | 3.00E+05 | 4.46E+05 | 3.22E+05 | 3.42E+05 | 2.06E+05 | 2.06E+05 |
| 2.01E+05 | 2.68E+05 | 1.97E+05 | 6.62E+05 | 7.20E+05 | 7.85E+05 | 7.28E+05 | 7.17E+05 | 5.34E+05 | 5.34E+05 |
| 2.61E+04 | 2.90E+04 | 2.11E+04 | 5.63E+04 | 6.91E+04 | 5.22E+04 | 5.89E+04 | 4.67E+04 | 4.75E+04 | 4.75E+04 |
| 9.60E+04 | 8.22E+04 | 6.18E+04 | 1.58E+05 | 1.89E+05 | 2.21E+05 | 1.48E+05 | 2.79E+05 | 1.61E+05 | 1.61E+05 |
| 1.33E+05 | 1.84E+05 | 1.18E+05 | 2.03E+05 | 1.67E+05 | 2.39E+05 | 2.34E+05 | 2.06E+05 | 1.72E+05 | 1.72E+05 |

|          |          |          |          |          |          |          |          |          |
|----------|----------|----------|----------|----------|----------|----------|----------|----------|
| 9.00E+00 | 9.00E+00 | 9.00E+00 | 2.85E+06 | 3.03E+06 | 2.91E+06 | 3.62E+06 | 3.41E+06 | 2.82E+06 |
| 1.55E+06 | 1.71E+06 | 1.58E+06 | 2.33E+06 | 2.70E+06 | 2.37E+06 | 2.26E+06 | 2.21E+06 | 1.61E+06 |
| 4.30E+04 | 7.16E+04 | 4.25E+04 | 6.52E+05 | 6.85E+05 | 8.84E+05 | 8.28E+05 | 7.40E+05 | 9.03E+05 |
| 5.15E+05 | 9.00E+00 | 9.00E+00 | 6.16E+05 | 8.82E+05 | 8.66E+05 | 1.18E+06 | 7.76E+05 | 8.47E+05 |
| 3.27E+07 | 3.56E+07 | 3.32E+07 | 5.94E+07 | 4.67E+07 | 4.82E+07 | 6.22E+07 | 4.90E+07 | 4.97E+07 |
| 2.03E+05 | 1.15E+05 | 1.16E+05 | 1.76E+05 | 1.94E+05 | 2.38E+05 | 9.00E+00 | 1.63E+05 | 1.33E+05 |
| 9.00E+00 | 9.00E+00 | 9.00E+00 | 2.42E+05 | 2.57E+05 | 3.80E+05 | 2.99E+05 | 2.71E+05 | 2.89E+05 |
| 4.78E+04 | 3.50E+04 | 2.05E+04 | 3.97E+05 | 3.97E+05 | 4.24E+05 | 4.36E+05 | 4.27E+05 | 2.89E+05 |
| 3.73E+06 | 4.07E+06 | 3.58E+06 | 3.36E+06 | 3.26E+06 | 3.99E+06 | 3.68E+06 | 3.88E+06 | 3.37E+06 |
| 6.39E+04 | 9.28E+04 | 8.93E+04 | 1.69E+05 | 1.59E+05 | 1.71E+05 | 1.35E+05 | 2.02E+05 | 1.35E+05 |
| 4.54E+05 | 5.09E+05 | 4.22E+05 | 3.02E+05 | 2.89E+05 | 3.71E+05 | 1.75E+05 | 5.34E+05 | 1.07E+05 |
| 7.62E+06 | 9.02E+06 | 6.51E+06 | 3.91E+06 | 3.67E+06 | 4.67E+06 | 2.77E+06 | 5.78E+06 | 3.84E+06 |
| 9.93E+05 | 1.39E+06 | 9.25E+05 | 3.09E+05 | 3.81E+05 | 4.22E+05 | 3.17E+05 | 4.26E+05 | 2.65E+05 |
| 5.42E+04 | 5.44E+04 | 4.99E+04 | 3.92E+04 | 3.72E+04 | 2.39E+04 | 2.82E+04 | 4.98E+04 | 4.30E+04 |
| 3.50E+04 | 4.89E+04 | 6.30E+04 | 5.83E+04 | 6.72E+04 | 2.42E+05 | 7.57E+04 | 6.11E+04 | 3.60E+04 |
| 2.77E+04 | 1.40E+04 | 9.00E+00 | 1.89E+04 | 1.46E+04 | 7.95E+04 | 1.67E+04 | 1.94E+04 | 1.52E+04 |
| 8.01E+04 | 9.65E+04 | 9.62E+04 | 1.18E+05 | 1.13E+05 | 1.49E+05 | 1.44E+05 | 8.24E+04 | 8.53E+04 |
| 4.90E+03 | 1.06E+04 | 4.18E+03 | 2.89E+04 | 4.63E+04 | 8.00E+05 | 1.71E+04 | 4.88E+04 | 3.46E+04 |
| 5.42E+03 | 1.50E+04 | 5.97E+03 | 1.06E+05 | 1.17E+05 | 1.64E+06 | 7.06E+04 | 1.45E+05 | 1.57E+05 |
| 5.83E+03 | 6.28E+03 | 5.80E+03 | 2.76E+05 | 2.68E+05 | 1.29E+06 | 3.39E+05 | 3.81E+05 | 4.21E+05 |
| 9.00E+00 | 9.00E+00 | 9.00E+00 | 8.35E+04 | 7.74E+04 | 2.92E+05 | 7.50E+04 | 1.43E+05 | 1.09E+05 |
| 9.00E+00 | 4.51E+03 | 8.16E+02 | 2.93E+04 | 5.20E+04 | 1.05E+05 | 1.67E+05 | 6.76E+04 | 7.94E+04 |
| 9.00E+00 | 4.27E+03 | 3.32E+03 | 4.93E+04 | 5.34E+04 | 6.01E+05 | 8.80E+04 | 1.22E+05 | 1.07E+05 |
| 8.38E+04 | 6.60E+04 | 5.17E+04 | 7.61E+04 | 1.00E+05 | 1.60E+06 | 9.76E+04 | 9.19E+04 | 9.24E+04 |
| 1.55E+04 | 3.38E+04 | 2.57E+04 | 4.01E+04 | 4.28E+04 | 4.27E+05 | 3.96E+04 | 7.21E+04 | 3.53E+04 |
| 8.72E+04 | 1.18E+05 | 8.43E+04 | 1.09E+05 | 1.46E+05 | 2.76E+06 | 1.15E+05 | 1.51E+05 | 1.39E+05 |
| 1.34E+04 | 2.40E+04 | 1.73E+04 | 5.18E+04 | 4.19E+04 | 5.24E+05 | 2.90E+04 | 6.07E+04 | 4.97E+04 |
| 3.81E+04 | 5.75E+04 | 6.47E+04 | 9.00E+00 | 9.00E+00 | 1.45E+05 | 9.00E+00 | 7.14E+04 | 9.00E+00 |
| 8.19E+03 | 8.63E+03 | 1.07E+04 | 4.54E+04 | 3.70E+04 | 1.16E+05 | 1.80E+04 | 5.08E+04 | 6.14E+04 |
| 2.09E+04 | 3.28E+04 | 4.76E+04 | 7.20E+04 | 6.52E+04 | 1.28E+06 | 4.00E+04 | 4.02E+04 | 6.27E+04 |
| 1.06E+05 | 6.04E+04 | 7.50E+04 | 1.39E+05 | 9.54E+04 | 1.61E+06 | 1.11E+05 | 1.50E+05 | 1.17E+05 |
| 3.81E+04 | 3.02E+04 | 5.16E+04 | 1.59E+05 | 1.60E+05 | 4.31E+06 | 8.41E+04 | 2.10E+05 | 1.70E+05 |
| 5.95E+03 | 7.31E+03 | 2.73E+04 | 1.95E+05 | 2.18E+05 | 3.22E+06 | 1.31E+05 | 4.24E+05 | 2.34E+05 |
| 9.00E+00 | 9.00E+00 | 9.00E+00 | 1.05E+05 | 8.31E+04 | 3.55E+05 | 2.55E+04 | 3.09E+05 | 7.52E+04 |
| 9.00E+00 | 9.00E+00 | 9.00E+00 | 2.02E+05 | 1.85E+05 | 1.28E+05 | 1.41E+05 | 2.34E+05 | 1.70E+05 |
| 1.49E+04 | 7.12E+03 | 9.64E+02 | 2.19E+05 | 1.67E+05 | 1.00E+06 | 1.07E+05 | 2.86E+05 | 1.63E+05 |
| 9.00E+00 | 9.00E+00 | 9.00E+00 | 6.97E+04 | 4.17E+04 | 2.18E+05 | 2.47E+04 | 9.88E+04 | 4.85E+04 |
| 7.10E+03 | 3.94E+03 | 1.48E+03 | 3.81E+05 | 3.13E+05 | 2.83E+05 | 7.05E+04 | 4.68E+05 | 2.40E+05 |
| 4.81E+03 | 9.00E+00 | 2.41E+03 | 9.24E+04 | 8.72E+04 | 5.12E+05 | 7.01E+04 | 2.54E+05 | 1.12E+05 |
| 9.00E+00 | 9.00E+00 | 1.37E+03 | 4.52E+04 | 3.57E+04 | 1.15E+05 | 7.59E+04 | 7.21E+04 | 5.31E+04 |
| 1.08E+05 | 1.05E+05 | 3.16E+04 | 1.26E+05 | 1.59E+05 | 2.03E+05 | 3.63E+04 | 1.61E+05 | 1.65E+05 |
| 1.04E+03 | 9.00E+00 | 9.00E+00 | 6.80E+04 | 6.79E+04 | 4.05E+04 | 3.03E+04 | 7.24E+04 | 6.18E+04 |
| 9.00E+00 | 9.00E+00 | 9.00E+00 | 6.00E+04 | 3.71E+04 | 8.80E+04 | 9.00E+00 | 8.18E+04 | 5.69E+04 |
| 2.58E+03 | 9.00E+00 | 1.47E+03 | 8.63E+04 | 8.08E+04 | 5.56E+04 | 2.74E+04 | 9.24E+04 | 5.79E+04 |
| 9.00E+00 | 9.00E+00 | 9.00E+00 | 1.01E+05 | 6.35E+04 | 5.57E+04 | 3.00E+04 | 1.45E+05 | 9.50E+04 |
| 1.75E+05 | 1.58E+05 | 1.95E+05 | 2.57E+05 | 3.34E+05 | 5.82E+06 | 2.38E+05 | 1.92E+05 | 1.78E+05 |
| 1.06E+05 | 8.09E+04 | 1.08E+05 | 1.20E+05 | 1.39E+05 | 2.92E+06 | 1.05E+05 | 1.51E+05 | 1.37E+05 |
| 3.17E+04 | 1.59E+04 | 4.41E+04 | 6.31E+04 | 3.00E+04 | 2.59E+05 | 4.80E+04 | 4.44E+04 | 2.00E+04 |
| 2.61E+04 | 1.02E+04 | 3.11E+04 | 1.17E+05 | 8.37E+04 | 1.80E+06 | 8.42E+04 | 1.69E+05 | 1.21E+05 |
| 4.59E+04 | 4.89E+04 | 2.03E+05 | 2.87E+05 | 2.17E+05 | 5.76E+05 | 2.63E+05 | 2.41E+05 | 2.82E+05 |
| 5.68E+04 | 6.02E+04 | 7.57E+04 | 5.39E+04 | 7.50E+04 | 2.06E+05 | 8.13E+04 | 9.36E+04 | 5.18E+04 |
| 1.79E+05 | 2.48E+05 | 1.46E+05 | 3.96E+05 | 4.19E+05 | 1.37E+07 | 3.46E+05 | 4.20E+05 | 3.66E+05 |
| 5.54E+04 | 3.02E+04 | 5.53E+04 | 1.19E+05 | 8.09E+04 | 4.51E+05 | 6.00E+04 | 1.16E+05 | 8.02E+04 |
| 1.58E+04 | 9.00E+00 | 1.02E+04 | 1.18E+05 | 9.26E+04 | 3.45E+05 | 5.49E+04 | 1.44E+05 | 1.09E+05 |

|          |          |          |          |          |          |          |          |          |
|----------|----------|----------|----------|----------|----------|----------|----------|----------|
| 4.29E+05 | 3.77E+05 | 4.74E+05 | 8.21E+05 | 7.83E+05 | 3.08E+07 | 6.98E+05 | 7.53E+05 | 6.64E+05 |
| 1.77E+05 | 1.31E+05 | 1.75E+05 | 3.44E+05 | 3.90E+05 | 2.07E+07 | 1.91E+05 | 4.14E+05 | 3.01E+05 |
| 9.38E+04 | 5.78E+04 | 8.09E+04 | 1.41E+05 | 1.20E+05 | 3.11E+06 | 1.36E+05 | 1.25E+05 | 1.12E+05 |
| 1.44E+05 | 1.21E+05 | 1.28E+05 | 1.32E+06 | 1.26E+06 | 2.40E+07 | 3.51E+05 | 2.02E+06 | 1.07E+06 |
| 6.01E+04 | 2.44E+04 | 5.18E+04 | 1.81E+06 | 1.34E+06 | 2.51E+07 | 6.16E+05 | 2.62E+06 | 1.56E+06 |
| 2.34E+04 | 6.94E+03 | 6.41E+03 | 2.28E+05 | 2.76E+05 | 3.68E+05 | 1.13E+05 | 3.13E+05 | 2.36E+05 |
| 9.00E+00 | 9.00E+00 | 2.71E+04 | 2.33E+05 | 1.62E+05 | 2.12E+05 | 1.23E+05 | 5.77E+05 | 2.11E+05 |
| 7.60E+03 | 1.15E+04 | 2.75E+04 | 4.29E+04 | 5.47E+04 | 3.88E+05 | 1.64E+04 | 7.33E+04 | 4.76E+04 |
| 8.67E+04 | 8.01E+04 | 1.01E+05 | 8.77E+05 | 7.02E+05 | 1.56E+07 | 1.83E+05 | 1.44E+06 | 7.29E+05 |
| 3.66E+04 | 8.71E+03 | 2.40E+04 | 4.46E+05 | 5.07E+05 | 8.16E+06 | 7.36E+04 | 1.07E+06 | 4.93E+05 |
| 1.11E+04 | 9.00E+00 | 3.74E+03 | 5.13E+04 | 9.51E+04 | 9.16E+05 | 1.79E+04 | 1.37E+05 | 7.46E+04 |
| 9.00E+00 | 1.98E+03 | 5.06E+02 | 1.72E+05 | 1.31E+05 | 2.06E+05 | 5.64E+04 | 2.16E+05 | 1.41E+05 |
| 9.00E+00 | 9.00E+00 | 9.00E+00 | 7.50E+03 | 1.07E+04 | 8.03E+04 | 3.23E+03 | 4.27E+04 | 2.70E+03 |
| 9.00E+00 | 5.43E+02 | 3.22E+03 | 4.48E+04 | 4.27E+04 | 2.87E+05 | 1.08E+04 | 6.93E+04 | 5.08E+04 |
| 9.00E+00 | 9.00E+00 | 9.00E+00 | 6.28E+04 | 4.63E+04 | 1.22E+05 | 1.13E+04 | 1.41E+05 | 1.01E+05 |
| 5.49E+03 | 2.22E+04 | 1.56E+04 | 2.57E+05 | 2.17E+05 | 4.79E+06 | 1.06E+05 | 2.60E+05 | 1.95E+05 |
| 1.17E+04 | 1.93E+03 | 6.87E+03 | 6.13E+05 | 5.86E+05 | 5.35E+06 | 9.31E+04 | 1.01E+06 | 7.34E+05 |
| 2.38E+04 | 2.64E+04 | 2.80E+04 | 3.74E+04 | 3.85E+04 | 2.94E+05 | 3.60E+04 | 3.97E+04 | 3.49E+04 |
| 9.00E+00 | 9.00E+00 | 5.29E+03 | 7.25E+04 | 8.42E+04 | 6.88E+05 | 5.80E+03 | 1.06E+05 | 1.07E+05 |
| 3.40E+03 | 1.45E+03 | 4.18E+03 | 2.27E+05 | 1.90E+05 | 7.77E+05 | 5.97E+04 | 2.11E+05 | 2.02E+05 |
| 1.53E+04 | 1.02E+04 | 7.71E+03 | 1.99E+06 | 1.86E+06 | 7.50E+06 | 1.09E+06 | 5.25E+06 | 2.57E+06 |
| 1.53E+03 | 9.00E+00 | 9.00E+00 | 3.10E+05 | 3.50E+05 | 1.22E+06 | 1.43E+05 | 1.09E+06 | 9.71E+04 |
| 9.00E+00 | 9.00E+00 | 1.35E+03 | 2.83E+04 | 2.50E+04 | 7.50E+04 | 7.90E+03 | 5.16E+04 | 2.95E+04 |
| 9.00E+00 | 9.00E+00 | 9.00E+00 | 8.84E+04 | 7.25E+04 | 1.66E+05 | 3.86E+04 | 1.88E+05 | 7.01E+04 |
| 2.35E+05 | 1.91E+05 | 1.44E+05 | 6.62E+07 | 5.44E+07 | 2.99E+07 | 1.30E+07 | 7.09E+07 | 4.41E+07 |
| 3.37E+03 | 5.34E+03 | 6.16E+03 | 8.75E+04 | 6.40E+04 | 6.73E+04 | 6.76E+04 | 1.07E+05 | 7.98E+04 |
| 1.84E+03 | 9.00E+00 | 9.00E+00 | 1.52E+04 | 3.16E+04 | 2.79E+04 | 1.72E+04 | 7.28E+04 | 9.00E+00 |
| 8.08E+03 | 2.18E+04 | 1.90E+04 | 1.26E+05 | 8.83E+04 | 8.68E+04 | 4.69E+04 | 6.65E+04 | 1.75E+05 |
| 1.11E+04 | 2.68E+04 | 1.71E+04 | 2.63E+05 | 2.38E+05 | 3.64E+06 | 1.62E+05 | 4.81E+05 | 2.86E+05 |
| 3.81E+04 | 9.00E+00 | 9.00E+00 | 6.33E+04 | 3.68E+04 | 5.34E+05 | 4.30E+04 | 7.41E+04 | 4.81E+04 |
| 1.09E+05 | 1.59E+05 | 1.53E+05 | 7.32E+05 | 6.27E+05 | 1.45E+07 | 1.08E+05 | 1.50E+06 | 5.54E+05 |
| 9.00E+00 | 1.35E+03 | 9.00E+00 | 6.75E+04 | 4.55E+04 | 6.45E+05 | 2.01E+04 | 1.89E+05 | 4.40E+04 |
| 9.00E+00 | 9.00E+00 | 9.00E+00 | 1.46E+05 | 9.35E+04 | 6.30E+04 | 2.26E+04 | 1.83E+05 | 1.16E+05 |
| 1.47E+03 | 9.00E+00 | 9.00E+00 | 1.16E+05 | 1.03E+05 | 4.47E+05 | 6.95E+04 | 4.76E+05 | 1.27E+05 |
| 9.00E+00 | 2.77E+03 | 1.39E+03 | 5.88E+04 | 2.92E+04 | 8.94E+04 | 2.14E+04 | 8.16E+04 | 3.20E+04 |
| 9.00E+00 | 9.00E+00 | 9.00E+00 | 1.32E+05 | 9.32E+04 | 6.08E+04 | 3.50E+04 | 1.59E+05 | 1.06E+05 |
| 2.89E+05 | 2.57E+05 | 3.15E+05 | 4.67E+05 | 4.04E+05 | 2.28E+06 | 4.38E+05 | 5.17E+05 | 4.14E+05 |
| 3.57E+04 | 1.06E+05 | 1.11E+05 | 2.00E+05 | 1.54E+05 | 1.57E+06 | 1.36E+05 | 2.13E+05 | 1.72E+05 |
| 2.38E+04 | 2.11E+04 | 2.10E+04 | 9.00E+00 | 9.00E+00 | 1.40E+05 | 9.00E+00 | 1.71E+04 | 9.00E+00 |
| 6.10E+04 | 6.73E+04 | 6.72E+04 | 2.87E+05 | 2.60E+05 | 2.64E+06 | 1.86E+05 | 5.07E+05 | 3.33E+05 |
| 9.00E+00 | 9.00E+00 | 1.46E+04 | 3.35E+05 | 2.69E+05 | 2.29E+06 | 1.72E+05 | 5.95E+05 | 3.72E+05 |
| 4.12E+03 | 9.00E+00 | 9.00E+00 | 9.11E+03 | 8.22E+03 | 3.26E+03 | 7.10E+03 | 7.09E+03 | 8.55E+03 |
| 3.38E+04 | 1.19E+04 | 3.73E+04 | 7.64E+04 | 7.75E+04 | 4.20E+05 | 8.63E+04 | 8.31E+04 | 6.39E+04 |
| 2.98E+04 | 8.50E+03 | 2.76E+04 | 4.94E+05 | 4.84E+05 | 3.19E+06 | 1.65E+05 | 8.90E+05 | 4.53E+05 |
| 1.26E+04 | 1.48E+04 | 1.61E+04 | 2.22E+05 | 2.10E+05 | 1.00E+06 | 5.91E+04 | 3.86E+05 | 2.42E+05 |
| 4.11E+03 | 9.00E+00 | 2.44E+03 | 4.56E+04 | 2.93E+04 | 4.11E+04 | 1.08E+04 | 5.17E+04 | 4.27E+04 |
| 9.00E+00 | 1.03E+03 | 2.96E+03 | 9.24E+04 | 5.72E+04 | 5.20E+04 | 1.71E+04 | 2.90E+04 | 8.28E+04 |
| 9.00E+00 | 1.57E+04 | 9.00E+00 | 7.28E+05 | 5.94E+05 | 1.97E+06 | 1.95E+05 | 1.40E+06 | 6.85E+05 |
| 9.00E+00 | 9.00E+00 | 9.00E+00 | 8.15E+04 | 8.86E+04 | 1.73E+05 | 2.49E+04 | 1.09E+05 | 7.24E+04 |
| 4.99E+03 | 6.43E+03 | 9.00E+00 | 1.66E+06 | 1.42E+06 | 2.19E+06 | 6.31E+05 | 3.06E+06 | 2.00E+06 |
| 9.00E+00 | 4.20E+03 | 4.63E+03 | 3.72E+05 | 3.66E+05 | 1.74E+05 | 1.79E+05 | 4.06E+05 | 4.91E+05 |
| 1.54E+03 | 1.02E+03 | 9.00E+00 | 1.45E+04 | 9.00E+00 | 9.00E+00 | 3.08E+03 | 1.60E+04 | 5.64E+03 |
| 9.00E+00 | 9.00E+00 | 9.00E+00 | 1.38E+05 | 1.34E+05 | 9.86E+05 | 8.60E+04 | 2.46E+05 | 1.17E+05 |
| 1.56E+04 | 4.70E+03 | 5.56E+03 | 9.66E+05 | 8.06E+05 | 5.36E+05 | 1.56E+05 | 9.96E+05 | 6.68E+05 |

|          |          |          |          |          |          |          |          |          |
|----------|----------|----------|----------|----------|----------|----------|----------|----------|
| 3.76E+03 | 5.34E+03 | 4.61E+03 | 1.13E+06 | 1.24E+06 | 1.80E+06 | 8.35E+05 | 3.64E+06 | 1.67E+06 |
| 9.00E+00 | 9.00E+00 | 9.00E+00 | 1.03E+05 | 1.01E+05 | 1.24E+05 | 5.58E+04 | 2.50E+05 | 9.96E+04 |
| 4.14E+03 | 9.00E+00 | 1.09E+03 | 8.03E+04 | 1.29E+05 | 4.95E+04 | 2.65E+04 | 6.48E+04 | 5.85E+04 |
| 1.96E+03 | 9.00E+00 | 9.00E+00 | 1.44E+05 | 9.40E+04 | 1.77E+05 | 3.50E+04 | 3.39E+05 | 1.27E+05 |
| 9.00E+00 | 9.00E+00 | 9.00E+00 | 2.77E+04 | 4.15E+04 | 1.59E+05 | 4.56E+03 | 7.39E+04 | 1.55E+04 |
| 1.62E+04 | 9.10E+03 | 1.23E+04 | 9.54E+04 | 7.31E+04 | 3.54E+05 | 9.60E+04 | 1.95E+05 | 1.26E+05 |
| 9.00E+00 | 3.75E+03 | 4.63E+03 | 1.02E+05 | 7.35E+04 | 1.96E+05 | 6.39E+04 | 1.92E+05 | 9.00E+00 |
| 9.00E+00 | 9.00E+00 | 5.50E+02 | 6.39E+04 | 5.57E+04 | 2.24E+04 | 2.94E+04 | 8.37E+04 | 4.67E+04 |
| 3.54E+04 | 2.88E+04 | 1.93E+04 | 5.12E+05 | 3.82E+05 | 3.44E+06 | 1.25E+05 | 1.23E+06 | 5.61E+05 |
| 2.73E+03 | 9.00E+00 | 9.00E+00 | 6.92E+04 | 6.27E+04 | 3.67E+05 | 1.15E+04 | 1.40E+05 | 5.88E+04 |
| 2.49E+06 | 3.01E+06 | 3.07E+06 | 6.31E+06 | 4.76E+06 | 1.12E+08 | 3.21E+06 | 5.97E+06 | 4.64E+06 |
| 5.59E+05 | 4.40E+05 | 5.75E+05 | 3.72E+06 | 3.60E+06 | 1.27E+08 | 7.93E+05 | 5.95E+06 | 2.44E+06 |
| 9.00E+00 | 9.00E+00 | 9.90E+04 | 1.77E+05 | 8.08E+04 | 1.05E+06 | 1.44E+05 | 1.48E+05 | 2.20E+05 |
| 2.39E+06 | 3.18E+06 | 2.74E+06 | 4.44E+06 | 3.53E+06 | 3.44E+07 | 3.22E+06 | 4.06E+06 | 3.55E+06 |
| 2.57E+05 | 2.91E+05 | 3.33E+05 | 2.92E+06 | 2.96E+06 | 4.18E+07 | 8.39E+05 | 4.76E+06 | 2.54E+06 |
| 2.63E+04 | 2.45E+04 | 1.65E+04 | 2.47E+05 | 1.85E+05 | 7.77E+05 | 1.22E+05 | 3.30E+05 | 2.22E+05 |
| 2.05E+05 | 2.66E+05 | 2.35E+05 | 1.80E+06 | 1.61E+06 | 2.66E+06 | 9.74E+05 | 2.73E+06 | 1.93E+06 |
| 1.39E+06 | 1.28E+06 | 1.84E+06 | 4.32E+06 | 2.40E+06 | 3.63E+06 | 1.12E+06 | 4.24E+06 | 2.38E+06 |
| 9.00E+00 | 9.00E+00 | 9.00E+00 | 7.08E+03 | 7.84E+03 | 7.97E+03 | 3.08E+03 | 6.54E+03 | 7.87E+03 |
| 1.90E+05 | 1.77E+04 | 1.93E+05 | 2.47E+06 | 2.49E+06 | 5.11E+07 | 6.00E+05 | 4.20E+06 | 2.20E+06 |
| 1.67E+04 | 9.00E+00 | 9.00E+00 | 1.81E+05 | 1.65E+05 | 1.32E+06 | 5.69E+04 | 2.41E+05 | 1.89E+05 |
| 1.02E+05 | 3.35E+04 | 1.09E+05 | 3.03E+06 | 2.98E+06 | 2.81E+07 | 3.27E+05 | 6.61E+06 | 2.33E+06 |
| 1.57E+05 | 1.14E+05 | 9.42E+04 | 1.14E+07 | 1.36E+07 | 7.00E+07 | 1.50E+06 | 3.02E+07 | 1.22E+07 |
| 9.71E+03 | 7.49E+03 | 1.50E+04 | 9.42E+05 | 1.05E+06 | 6.19E+06 | 1.67E+05 | 2.32E+06 | 8.64E+05 |
| 9.00E+00 | 9.00E+00 | 9.00E+00 | 5.00E+04 | 3.74E+04 | 2.54E+05 | 6.02E+03 | 1.16E+05 | 1.42E+04 |
| 9.00E+00 | 9.00E+00 | 9.00E+00 | 1.45E+04 | 1.25E+04 | 4.92E+05 | 8.73E+03 | 7.10E+03 | 7.03E+03 |
| 1.97E+05 | 9.35E+04 | 1.41E+05 | 1.77E+07 | 1.54E+07 | 4.41E+07 | 3.00E+06 | 3.43E+07 | 1.79E+07 |
| 3.27E+04 | 4.12E+04 | 3.92E+04 | 1.77E+06 | 1.58E+06 | 1.97E+06 | 4.49E+05 | 3.38E+06 | 1.66E+06 |
| 9.00E+00 | 9.00E+00 | 2.49E+03 | 4.68E+05 | 4.56E+05 | 5.48E+05 | 5.34E+04 | 8.75E+05 | 3.55E+05 |
| 1.91E+03 | 2.65E+03 | 1.21E+03 | 1.33E+04 | 1.02E+04 | 1.51E+05 | 4.84E+03 | 1.09E+04 | 4.89E+03 |
| 9.00E+00 | 4.18E+03 | 7.20E+03 | 1.06E+06 | 9.19E+05 | 5.02E+05 | 1.14E+05 | 8.47E+05 | 1.09E+06 |
| 1.78E+05 | 1.55E+05 | 1.31E+05 | 6.08E+06 | 5.77E+06 | 4.39E+06 | 4.52E+05 | 6.39E+06 | 3.29E+06 |
| 2.03E+03 | 9.00E+00 | 1.03E+03 | 3.77E+05 | 3.52E+05 | 1.27E+06 | 1.23E+05 | 7.40E+05 | 3.39E+05 |
| 3.45E+04 | 3.53E+04 | 4.44E+04 | 5.05E+04 | 6.95E+04 | 1.72E+05 | 5.88E+04 | 2.75E+04 | 6.33E+04 |
| 9.00E+00 | 9.00E+00 | 2.24E+04 | 3.94E+05 | 2.91E+05 | 3.13E+06 | 1.82E+05 | 6.62E+05 | 2.55E+05 |
| 1.46E+03 | 9.00E+00 | 9.00E+00 | 9.91E+04 | 1.28E+04 | 1.82E+04 | 9.05E+03 | 5.49E+04 | 9.81E+04 |
| 1.59E+03 | 1.04E+03 | 9.00E+00 | 3.03E+05 | 2.62E+05 | 1.93E+05 | 4.18E+04 | 3.67E+05 | 2.73E+05 |
| 5.89E+04 | 5.99E+04 | 5.08E+04 | 2.00E+06 | 1.67E+06 | 7.58E+06 | 3.51E+05 | 4.19E+06 | 2.03E+06 |
| 1.06E+04 | 4.69E+03 | 2.48E+03 | 1.09E+06 | 1.15E+06 | 3.24E+06 | 2.10E+05 | 2.98E+06 | 1.10E+06 |
| 9.00E+00 | 9.00E+00 | 9.00E+00 | 8.79E+04 | 8.14E+04 | 1.07E+05 | 4.64E+03 | 1.17E+05 | 6.67E+04 |
| 1.10E+04 | 6.79E+03 | 2.54E+03 | 8.28E+05 | 6.72E+05 | 4.71E+05 | 1.74E+05 | 7.95E+05 | 6.07E+05 |
| 9.00E+00 | 9.00E+00 | 5.50E+02 | 3.04E+05 | 2.93E+05 | 1.44E+05 | 3.48E+05 | 5.02E+05 | 4.49E+05 |
| 7.10E+05 | 7.61E+05 | 6.91E+05 | 1.44E+06 | 1.30E+06 | 3.16E+06 | 1.19E+06 | 1.66E+06 | 1.27E+06 |
| 6.76E+05 | 8.09E+05 | 8.57E+05 | 4.53E+06 | 3.85E+06 | 6.54E+07 | 2.80E+06 | 7.64E+06 | 3.81E+06 |
| 1.30E+05 | 1.08E+05 | 1.47E+05 | 6.49E+06 | 4.66E+06 | 5.12E+07 | 5.08E+06 | 1.18E+07 | 4.79E+06 |
| 2.18E+04 | 1.91E+04 | 1.66E+04 | 1.82E+04 | 1.30E+04 | 3.68E+04 | 1.99E+04 | 1.55E+04 | 1.81E+04 |
| 6.52E+04 | 6.18E+04 | 7.66E+04 | 6.90E+04 | 6.50E+04 | 3.67E+05 | 5.39E+04 | 8.15E+04 | 5.92E+04 |
| 9.00E+00 | 9.00E+00 | 1.29E+03 | 7.07E+05 | 6.16E+05 | 1.69E+06 | 7.18E+05 | 2.21E+06 | 7.34E+05 |
| 8.39E+03 | 6.00E+03 | 7.11E+03 | 1.15E+04 | 1.31E+04 | 1.14E+04 | 1.44E+04 | 1.35E+04 | 8.52E+03 |
| 1.35E+05 | 1.26E+05 | 9.00E+00 | 5.00E+06 | 3.32E+06 | 3.14E+06 | 5.74E+05 | 4.95E+06 | 2.79E+06 |
| 3.44E+05 | 2.40E+05 | 2.91E+05 | 2.99E+07 | 2.44E+07 | 8.04E+07 | 4.70E+06 | 4.91E+07 | 2.51E+07 |
| 3.65E+05 | 2.61E+05 | 2.61E+05 | 8.34E+07 | 5.85E+07 | 1.13E+08 | 2.94E+07 | 1.47E+08 | 6.75E+07 |
| 9.00E+00 | 9.00E+00 | 7.20E+03 | 5.59E+05 | 3.98E+05 | 2.08E+06 | 8.17E+04 | 7.61E+05 | 4.83E+05 |
| 7.08E+04 | 4.91E+04 | 3.92E+04 | 2.44E+06 | 1.62E+06 | 1.05E+07 | 5.92E+05 | 3.15E+06 | 1.94E+06 |

|          |          |          |          |          |          |          |          |          |
|----------|----------|----------|----------|----------|----------|----------|----------|----------|
| 3.21E+04 | 1.07E+04 | 2.75E+04 | 2.88E+06 | 2.03E+06 | 3.00E+06 | 6.70E+05 | 3.46E+06 | 2.61E+06 |
| 4.87E+05 | 4.01E+05 | 4.12E+05 | 1.57E+07 | 1.29E+07 | 1.18E+07 | 6.82E+06 | 2.77E+07 | 1.54E+07 |
| 7.35E+03 | 1.12E+04 | 1.01E+04 | 1.10E+04 | 1.32E+04 | 1.30E+05 | 3.83E+04 | 2.08E+04 | 2.77E+04 |
| 9.00E+00 | 5.59E+03 | 9.00E+00 | 6.39E+04 | 6.42E+04 | 2.99E+05 | 3.29E+04 | 5.95E+04 | 6.85E+04 |
| 9.00E+00 | 9.00E+00 | 9.00E+00 | 4.55E+04 | 1.59E+05 | 1.91E+05 | 5.16E+04 | 2.98E+05 | 2.60E+05 |
| 5.33E+04 | 2.94E+04 | 1.88E+04 | 1.04E+06 | 7.66E+05 | 1.03E+06 | 3.66E+05 | 1.77E+06 | 1.06E+06 |
| 2.37E+04 | 9.00E+00 | 2.16E+04 | 3.41E+06 | 2.66E+06 | 1.96E+06 | 6.50E+05 | 5.57E+06 | 2.53E+06 |
| 1.44E+06 | 1.26E+06 | 1.32E+06 | 5.04E+07 | 4.05E+07 | 2.53E+07 | 6.06E+06 | 4.10E+07 | 2.70E+07 |
| 9.00E+00 | 9.00E+00 | 2.29E+03 | 3.02E+04 | 2.59E+04 | 1.25E+05 | 2.44E+04 | 2.46E+04 | 3.26E+04 |
| 9.00E+00 | 9.00E+00 | 9.00E+00 | 2.84E+04 | 2.81E+04 | 2.49E+04 | 7.73E+03 | 2.29E+04 | 3.12E+04 |
| 9.00E+00 | 6.16E+03 | 1.90E+03 | 4.51E+04 | 3.16E+04 | 1.78E+05 | 3.72E+04 | 9.69E+04 | 6.24E+04 |
| 1.43E+05 | 8.27E+04 | 6.62E+04 | 3.13E+07 | 3.06E+07 | 3.94E+07 | 1.80E+07 | 8.25E+07 | 3.91E+07 |
| 4.17E+04 | 2.35E+04 | 2.74E+04 | 7.13E+06 | 5.88E+06 | 1.08E+07 | 3.37E+06 | 2.00E+07 | 7.11E+06 |
| 6.70E+03 | 2.50E+03 | 3.58E+03 | 5.24E+05 | 4.46E+05 | 7.37E+05 | 1.62E+05 | 1.32E+06 | 4.81E+05 |
| 6.40E+04 | 4.06E+04 | 5.45E+04 | 2.80E+07 | 2.52E+07 | 1.38E+07 | 1.87E+07 | 3.96E+07 | 2.81E+07 |
| 2.84E+04 | 1.90E+04 | 1.74E+04 | 7.99E+06 | 6.97E+06 | 4.67E+06 | 2.08E+06 | 1.36E+07 | 5.15E+06 |
| 2.34E+05 | 2.07E+05 | 1.89E+05 | 6.58E+07 | 5.74E+07 | 3.44E+07 | 1.57E+07 | 8.72E+07 | 3.61E+07 |
| 9.00E+00 | 9.00E+00 | 9.00E+00 | 9.00E+00 | 1.04E+04 | 1.14E+05 | 9.00E+00 | 9.00E+00 | 9.00E+00 |
| 9.00E+00 | 9.00E+00 | 2.72E+03 | 2.00E+04 | 4.03E+03 | 2.97E+04 | 9.44E+03 | 3.40E+04 | 2.93E+04 |
| 9.00E+00 | 9.00E+00 | 9.00E+00 | 6.29E+05 | 5.77E+05 | 3.27E+05 | 7.81E+05 | 9.41E+05 | 8.63E+05 |
| 2.27E+04 | 1.30E+04 | 1.86E+04 | 1.29E+05 | 9.69E+04 | 1.36E+06 | 8.11E+04 | 1.35E+05 | 1.14E+05 |
| 9.00E+00 | 9.00E+00 | 9.00E+00 | 2.56E+05 | 1.42E+05 | 1.84E+05 | 8.34E+04 | 3.14E+05 | 2.60E+05 |
| 8.05E+04 | 6.53E+04 | 7.47E+04 | 1.20E+07 | 9.58E+06 | 4.02E+07 | 8.83E+06 | 2.89E+07 | 1.09E+07 |
| 3.34E+03 | 2.51E+03 | 9.00E+00 | 8.68E+05 | 6.08E+05 | 3.81E+05 | 1.75E+05 | 1.85E+05 | 6.12E+05 |
| 1.62E+05 | 1.29E+05 | 1.25E+05 | 2.08E+07 | 1.52E+07 | 1.13E+07 | 5.03E+06 | 2.49E+07 | 1.31E+07 |
| 9.00E+00 | 9.00E+00 | 9.00E+00 | 2.78E+05 | 2.07E+05 | 6.95E+04 | 1.00E+05 | 4.52E+05 | 2.12E+05 |
| 1.26E+04 | 1.45E+04 | 1.33E+04 | 1.50E+06 | 5.34E+05 | 4.07E+05 | 8.84E+05 | 1.58E+06 | 3.15E+05 |
| 4.59E+04 | 4.77E+04 | 5.85E+04 | 7.92E+05 | 8.62E+05 | 3.32E+05 | 6.49E+05 | 1.05E+06 | 1.06E+06 |
| 9.32E+03 | 7.19E+03 | 6.21E+03 | 3.47E+04 | 5.33E+04 | 2.51E+04 | 3.09E+04 | 6.84E+04 | 6.12E+04 |
| 9.00E+00 | 9.00E+00 | 9.00E+00 | 9.00E+00 | 2.36E+05 | 9.00E+00 | 9.00E+00 | 4.53E+05 | 9.00E+00 |
| 9.00E+00 | 9.00E+00 | 1.53E+04 | 3.79E+05 | 2.11E+05 | 9.35E+04 | 1.25E+05 | 4.02E+05 | 2.41E+05 |
| 5.07E+05 | 4.97E+05 | 5.38E+05 | 3.29E+06 | 2.23E+06 | 2.10E+06 | 1.27E+06 | 3.26E+06 | 2.29E+06 |
| 9.00E+00 | 9.00E+00 | 9.00E+00 | 1.44E+04 | 1.06E+04 | 4.03E+04 | 1.68E+04 | 1.26E+04 | 1.52E+04 |
| 9.00E+00 | 9.00E+00 | 3.46E+03 | 1.70E+04 | 4.21E+04 | 1.34E+05 | 2.85E+03 | 6.13E+04 | 2.27E+04 |
| 2.59E+04 | 3.79E+04 | 9.31E+03 | 1.92E+05 | 1.65E+05 | 1.09E+06 | 8.18E+04 | 4.14E+05 | 2.01E+05 |
| 1.72E+05 | 7.04E+04 | 1.51E+05 | 5.16E+06 | 5.58E+06 | 4.33E+07 | 1.35E+06 | 1.12E+07 | 6.11E+06 |
| 9.46E+04 | 3.54E+04 | 6.04E+04 | 2.34E+06 | 2.79E+06 | 1.97E+07 | 1.40E+05 | 7.13E+06 | 1.99E+06 |
| 5.18E+03 | 9.00E+00 | 9.00E+00 | 1.44E+05 | 1.72E+05 | 1.14E+06 | 1.97E+04 | 5.18E+05 | 1.34E+05 |
| 4.39E+03 | 1.43E+03 | 9.00E+00 | 3.24E+05 | 2.21E+05 | 2.81E+05 | 6.81E+04 | 3.63E+05 | 1.97E+05 |
| 7.62E+03 | 9.12E+03 | 1.52E+04 | 2.31E+06 | 2.14E+06 | 1.48E+06 | 3.57E+05 | 2.44E+06 | 1.17E+06 |
| 9.00E+00 | 9.00E+00 | 9.00E+00 | 3.73E+05 | 3.34E+05 | 2.49E+05 | 4.21E+04 | 6.58E+05 | 3.27E+05 |
| 4.30E+04 | 2.68E+04 | 4.09E+04 | 1.06E+07 | 1.01E+07 | 6.20E+06 | 3.62E+06 | 1.66E+07 | 8.13E+06 |
| 9.00E+00 | 1.98E+03 | 3.27E+03 | 8.44E+04 | 7.29E+04 | 2.02E+05 | 2.47E+04 | 2.93E+05 | 1.15E+05 |
| 9.00E+00 | 9.00E+00 | 9.00E+00 | 2.43E+05 | 1.41E+05 | 1.06E+05 | 3.80E+04 | 2.93E+05 | 1.16E+05 |
| 2.64E+04 | 9.00E+00 | 9.00E+00 | 3.44E+05 | 3.49E+05 | 2.16E+06 | 5.79E+04 | 7.25E+05 | 3.95E+05 |
| 6.59E+03 | 4.29E+03 | 2.69E+03 | 1.83E+05 | 1.87E+05 | 6.87E+05 | 2.01E+04 | 5.04E+05 | 1.82E+05 |
| 9.00E+00 | 9.00E+00 | 9.00E+00 | 1.04E+05 | 7.27E+04 | 1.73E+05 | 6.43E+04 | 2.54E+05 | 1.19E+05 |
| 5.07E+02 | 9.00E+00 | 9.00E+00 | 6.42E+05 | 5.01E+05 | 3.29E+05 | 1.86E+05 | 6.64E+05 | 5.54E+05 |
| 8.49E+04 | 7.22E+04 | 7.98E+04 | 2.36E+06 | 1.80E+06 | 1.10E+07 | 5.30E+05 | 3.42E+06 | 1.89E+06 |
| 9.00E+00 | 9.00E+00 | 9.00E+00 | 2.21E+05 | 1.65E+05 | 3.67E+05 | 5.15E+04 | 5.15E+05 | 2.35E+05 |
| 9.00E+00 | 9.00E+00 | 9.00E+00 | 4.86E+04 | 4.03E+04 | 2.06E+05 | 3.56E+04 | 8.80E+04 | 4.04E+04 |
| 2.35E+05 | 1.05E+05 | 1.57E+05 | 1.12E+07 | 1.03E+07 | 5.67E+07 | 1.32E+06 | 2.60E+07 | 1.09E+07 |
| 7.42E+04 | 4.46E+04 | 3.81E+04 | 1.67E+07 | 1.67E+07 | 2.47E+07 | 8.83E+06 | 4.27E+07 | 1.99E+07 |
| 5.99E+04 | 2.65E+04 | 3.62E+04 | 9.11E+06 | 7.95E+06 | 1.52E+07 | 4.25E+06 | 2.51E+07 | 9.63E+06 |

|          |          |          |          |          |          |          |          |          |
|----------|----------|----------|----------|----------|----------|----------|----------|----------|
| 9.00E+00 | 9.00E+00 | 9.00E+00 | 6.62E+05 | 6.12E+05 | 1.03E+06 | 1.54E+05 | 1.25E+06 | 7.90E+05 |
| 2.57E+04 | 1.18E+04 | 2.55E+04 | 6.53E+05 | 4.38E+05 | 3.85E+05 | 5.22E+04 | 6.94E+05 | 3.03E+05 |
| 9.00E+00 | 9.00E+00 | 9.00E+00 | 1.12E+05 | 1.02E+05 | 5.17E+05 | 1.04E+05 | 1.61E+05 | 1.54E+05 |
| 9.00E+00 | 2.07E+03 | 9.00E+00 | 2.72E+04 | 4.67E+04 | 1.12E+05 | 5.71E+03 | 5.91E+04 | 1.12E+04 |
| 1.45E+04 | 8.69E+03 | 9.00E+00 | 1.17E+06 | 9.83E+05 | 8.34E+05 | 5.16E+04 | 1.48E+06 | 7.42E+05 |
| 1.18E+05 | 5.78E+04 | 7.39E+04 | 1.48E+07 | 1.41E+07 | 2.78E+07 | 2.14E+06 | 4.61E+07 | 1.69E+07 |
| 9.00E+00 | 1.01E+03 | 9.00E+00 | 2.20E+05 | 1.98E+05 | 2.29E+05 | 1.17E+05 | 4.13E+05 | 3.25E+05 |
| 1.97E+04 | 8.95E+03 | 1.47E+04 | 6.44E+06 | 6.32E+06 | 3.29E+06 | 1.04E+06 | 9.50E+06 | 4.24E+06 |
| 9.00E+00 | 9.00E+00 | 9.00E+00 | 3.57E+05 | 2.51E+05 | 9.47E+04 | 1.87E+05 | 4.07E+05 | 2.41E+05 |
| 1.38E+03 | 9.00E+00 | 9.00E+00 | 4.55E+05 | 3.06E+05 | 1.43E+05 | 2.46E+05 | 6.02E+05 | 2.65E+05 |
| 5.63E+03 | 9.79E+02 | 1.93E+03 | 5.83E+04 | 2.85E+04 | 2.83E+04 | 2.24E+04 | 1.03E+05 | 3.24E+04 |
| 9.00E+00 | 9.00E+00 | 9.00E+00 | 1.57E+04 | 1.18E+04 | 9.22E+04 | 2.91E+03 | 1.61E+04 | 8.97E+03 |
| 5.36E+04 | 6.65E+04 | 5.89E+04 | 1.19E+05 | 1.24E+05 | 7.40E+04 | 1.10E+05 | 1.18E+05 | 1.07E+05 |
| 9.00E+00 | 9.00E+00 | 9.00E+00 | 8.71E+04 | 5.71E+04 | 4.51E+05 | 1.35E+04 | 1.02E+05 | 8.46E+04 |
| 9.00E+00 | 9.00E+00 | 9.00E+00 | 6.48E+05 | 5.77E+05 | 1.62E+06 | 4.15E+05 | 1.16E+06 | 8.28E+05 |
| 6.92E+03 | 8.02E+03 | 5.36E+03 | 1.42E+06 | 1.36E+06 | 3.41E+06 | 1.28E+06 | 3.83E+06 | 2.15E+06 |
| 9.00E+00 | 9.00E+00 | 9.00E+00 | 2.87E+04 | 1.10E+04 | 4.99E+04 | 7.83E+03 | 1.54E+04 | 1.23E+04 |
| 9.00E+00 | 9.00E+00 | 1.16E+03 | 1.02E+04 | 5.53E+04 | 1.34E+04 | 2.80E+03 | 9.67E+03 | 3.15E+04 |
| 9.00E+00 | 9.00E+00 | 9.00E+00 | 9.39E+04 | 3.85E+04 | 2.41E+05 | 3.19E+04 | 3.68E+05 | 1.29E+05 |
| 4.93E+03 | 7.87E+03 | 9.88E+03 | 6.70E+05 | 5.62E+05 | 3.88E+05 | 2.12E+05 | 6.32E+05 | 5.54E+05 |
| 9.00E+00 | 2.68E+03 | 9.00E+00 | 2.34E+05 | 1.56E+05 | 2.63E+05 | 1.82E+05 | 5.26E+05 | 2.75E+05 |
| 2.05E+03 | 2.12E+03 | 3.04E+03 | 1.48E+06 | 1.20E+06 | 7.23E+05 | 5.93E+05 | 1.47E+06 | 1.13E+06 |
| 9.00E+00 | 9.00E+00 | 9.99E+02 | 7.66E+04 | 7.62E+04 | 1.06E+05 | 3.63E+04 | 2.35E+05 | 9.48E+04 |
| 9.00E+00 | 9.00E+00 | 9.00E+00 | 3.80E+04 | 2.98E+04 | 1.01E+05 | 9.18E+03 | 1.30E+05 | 4.41E+04 |
| 9.00E+00 | 2.56E+03 | 9.00E+00 | 7.40E+05 | 6.55E+05 | 3.28E+05 | 1.68E+05 | 5.60E+05 | 6.35E+05 |
| 2.77E+04 | 1.21E+04 | 1.95E+04 | 2.52E+06 | 2.12E+06 | 7.11E+06 | 1.14E+06 | 5.79E+06 | 2.78E+06 |
| 1.26E+04 | 1.07E+03 | 1.32E+04 | 1.28E+06 | 1.18E+06 | 2.36E+06 | 4.96E+05 | 4.19E+06 | 1.78E+06 |
| 9.00E+00 | 9.00E+00 | 9.00E+00 | 1.13E+04 | 1.23E+04 | 1.12E+05 | 5.61E+03 | 5.76E+04 | 2.63E+04 |
| 9.00E+00 | 9.00E+00 | 9.00E+00 | 4.95E+05 | 3.70E+05 | 1.63E+06 | 1.65E+05 | 1.37E+06 | 4.89E+05 |
| 2.60E+03 | 5.19E+02 | 9.00E+00 | 2.70E+05 | 1.90E+05 | 1.98E+05 | 7.92E+04 | 2.86E+05 | 1.64E+05 |
| 9.00E+00 | 9.00E+00 | 1.03E+03 | 9.02E+05 | 9.08E+05 | 1.04E+06 | 6.04E+05 | 3.00E+06 | 1.26E+06 |
| 9.00E+00 | 9.00E+00 | 9.00E+00 | 1.75E+05 | 1.52E+05 | 1.52E+05 | 7.67E+04 | 3.73E+05 | 1.58E+05 |
| 9.00E+00 | 9.00E+00 | 1.48E+03 | 4.95E+05 | 3.52E+05 | 2.30E+05 | 9.76E+04 | 6.30E+05 | 3.36E+05 |
| 9.00E+00 | 9.00E+00 | 2.48E+03 | 4.37E+04 | 2.68E+04 | 5.35E+04 | 6.49E+03 | 9.95E+04 | 9.89E+04 |
| 1.10E+03 | 2.12E+03 | 9.00E+00 | 2.38E+04 | 3.31E+04 | 1.15E+04 | 1.36E+04 | 5.25E+04 | 1.79E+04 |
| 1.71E+05 | 1.38E+05 | 1.56E+05 | 5.51E+06 | 4.21E+06 | 4.01E+07 | 3.89E+06 | 1.18E+07 | 4.89E+06 |
| 2.13E+04 | 1.15E+04 | 2.29E+04 | 5.29E+05 | 2.55E+05 | 3.28E+05 | 1.36E+05 | 5.35E+05 | 3.88E+05 |
| 2.22E+04 | 9.00E+00 | 9.00E+00 | 2.44E+06 | 2.02E+06 | 3.02E+06 | 1.40E+06 | 4.51E+06 | 2.76E+06 |
| 1.10E+04 | 1.99E+04 | 2.32E+04 | 1.40E+06 | 1.26E+06 | 5.13E+06 | 6.35E+05 | 2.44E+06 | 1.63E+06 |
| 4.75E+05 | 4.48E+05 | 4.19E+05 | 6.16E+05 | 5.74E+05 | 5.33E+05 | 6.52E+05 | 6.35E+05 | 5.44E+05 |
| 2.12E+05 | 1.98E+05 | 2.29E+05 | 1.13E+06 | 8.82E+05 | 9.09E+06 | 1.05E+06 | 1.39E+06 | 8.77E+05 |
| 1.28E+04 | 6.82E+03 | 1.91E+04 | 1.91E+05 | 1.83E+05 | 1.61E+05 | 7.60E+04 | 3.72E+05 | 1.55E+05 |
| 1.62E+05 | 9.97E+04 | 1.30E+05 | 4.70E+06 | 3.47E+06 | 3.07E+07 | 3.35E+06 | 9.21E+06 | 3.58E+06 |
| 7.98E+04 | 7.26E+04 | 5.19E+04 | 1.11E+07 | 9.30E+06 | 3.51E+07 | 9.36E+06 | 2.50E+07 | 1.10E+07 |
| 9.00E+00 | 9.00E+00 | 9.00E+00 | 2.74E+04 | 1.71E+04 | 1.74E+05 | 1.75E+04 | 4.73E+04 | 1.92E+04 |
| 7.51E+03 | 7.15E+03 | 6.42E+03 | 1.52E+04 | 1.68E+04 | 9.89E+04 | 1.91E+04 | 1.16E+04 | 1.88E+04 |
| 2.04E+04 | 1.08E+04 | 5.00E+03 | 8.55E+04 | 6.32E+04 | 6.31E+05 | 9.78E+04 | 2.00E+05 | 1.20E+05 |
| 9.00E+00 | 9.00E+00 | 9.00E+00 | 4.04E+05 | 4.45E+05 | 5.23E+05 | 3.04E+05 | 8.46E+05 | 3.91E+05 |
| 1.83E+05 | 2.20E+05 | 1.78E+05 | 3.37E+06 | 3.22E+06 | 1.98E+06 | 2.09E+06 | 6.11E+06 | 4.05E+06 |
| 9.00E+00 | 9.00E+00 | 9.00E+00 | 5.94E+04 | 3.20E+04 | 4.80E+04 | 5.70E+04 | 6.70E+04 | 5.52E+04 |
| 9.00E+00 | 9.00E+00 | 9.00E+00 | 2.42E+05 | 3.78E+04 | 1.72E+05 | 1.68E+05 | 3.48E+05 | 2.13E+05 |
| 1.87E+05 | 1.48E+05 | 1.24E+05 | 2.27E+06 | 1.76E+06 | 1.67E+06 | 7.64E+05 | 3.16E+06 | 1.45E+06 |
| 9.00E+00 | 9.00E+00 | 9.00E+00 | 1.09E+05 | 6.03E+04 | 5.99E+05 | 7.32E+04 | 1.00E+05 | 7.78E+04 |
| 8.35E+03 | 8.81E+02 | 9.00E+00 | 1.14E+06 | 9.00E+05 | 1.34E+06 | 2.47E+05 | 2.44E+06 | 1.26E+06 |

|          |          |          |          |          |          |          |          |          |
|----------|----------|----------|----------|----------|----------|----------|----------|----------|
| 1.04E+05 | 8.36E+04 | 7.38E+04 | 1.05E+07 | 2.60E+06 | 5.57E+06 | 1.30E+06 | 1.94E+07 | 1.41E+07 |
| 1.88E+04 | 5.03E+03 | 5.98E+03 | 1.80E+04 | 3.18E+04 | 1.54E+04 | 1.84E+04 | 2.51E+04 | 1.21E+04 |
| 1.10E+05 | 6.49E+04 | 1.12E+05 | 2.15E+07 | 1.46E+07 | 1.17E+07 | 5.44E+06 | 2.48E+07 | 1.23E+07 |
| 9.00E+00 | 9.00E+00 | 9.00E+00 | 1.74E+06 | 1.34E+06 | 1.63E+06 | 1.25E+06 | 3.80E+06 | 2.16E+06 |
| 9.00E+00 | 9.00E+00 | 9.00E+00 | 9.00E+00 | 9.00E+00 | 1.29E+03 | 9.00E+00 | 9.00E+00 | 9.00E+00 |
| 9.00E+00 | 9.00E+00 | 9.00E+00 | 3.65E+03 | 1.31E+03 | 6.71E+03 | 5.46E+03 | 3.29E+03 | 4.71E+03 |
| 3.98E+04 | 4.61E+04 | 3.93E+04 | 7.31E+05 | 7.09E+05 | 5.04E+05 | 5.21E+05 | 1.87E+06 | 9.19E+05 |
| 9.00E+00 | 9.00E+00 | 9.00E+00 | 4.67E+04 | 5.31E+04 | 2.12E+04 | 1.43E+04 | 4.27E+04 | 2.06E+04 |
| 1.46E+03 | 9.00E+00 | 9.85E+02 | 6.15E+04 | 5.23E+04 | 6.14E+04 | 4.08E+04 | 1.48E+05 | 9.00E+04 |
| 2.31E+04 | 1.97E+04 | 1.51E+04 | 1.25E+06 | 6.82E+05 | 3.52E+05 | 2.65E+05 | 1.39E+06 | 6.78E+05 |
| 9.00E+00 | 9.00E+00 | 9.00E+00 | 1.45E+04 | 7.97E+03 | 4.20E+04 | 1.79E+04 | 9.27E+03 | 1.23E+04 |
| 2.41E+03 | 9.00E+00 | 9.52E+02 | 1.04E+06 | 8.07E+05 | 4.98E+05 | 2.14E+05 | 1.59E+06 | 5.88E+05 |
| 1.59E+03 | 9.00E+00 | 9.00E+00 | 1.55E+05 | 1.56E+05 | 1.79E+05 | 5.25E+04 | 4.43E+05 | 2.03E+05 |
| 1.20E+05 | 1.07E+05 | 9.80E+04 | 5.22E+06 | 7.24E+06 | 5.78E+06 | 2.26E+06 | 1.81E+07 | 7.87E+06 |
| 9.88E+04 | 3.18E+04 | 1.05E+05 | 8.55E+06 | 7.85E+06 | 3.84E+07 | 2.54E+06 | 2.61E+07 | 9.09E+06 |
| 8.40E+04 | 3.19E+04 | 3.92E+04 | 1.15E+07 | 8.82E+06 | 2.74E+07 | 4.90E+06 | 2.88E+07 | 1.23E+07 |
| 9.00E+00 | 9.00E+00 | 9.00E+00 | 4.23E+05 | 3.59E+05 | 2.55E+06 | 1.02E+05 | 1.15E+06 | 3.79E+05 |
| 1.55E+04 | 1.41E+04 | 1.17E+04 | 1.14E+06 | 8.24E+05 | 5.95E+06 | 1.45E+05 | 2.48E+06 | 6.30E+05 |
| 9.00E+00 | 9.00E+00 | 9.00E+00 | 1.25E+04 | 1.16E+04 | 5.12E+04 | 3.95E+04 | 2.16E+04 | 3.07E+04 |
| 9.00E+00 | 9.00E+00 | 9.00E+00 | 2.19E+05 | 1.40E+05 | 5.73E+05 | 1.62E+05 | 3.17E+05 | 2.35E+05 |
| 2.00E+03 | 1.71E+03 | 2.67E+03 | 3.45E+05 | 2.53E+05 | 2.58E+05 | 7.25E+04 | 4.67E+05 | 3.96E+05 |
| 4.40E+04 | 2.76E+04 | 3.25E+04 | 4.38E+06 | 2.85E+06 | 2.51E+06 | 8.07E+05 | 4.85E+06 | 2.87E+06 |
| 9.00E+00 | 9.00E+00 | 9.00E+00 | 2.03E+04 | 2.89E+04 | 1.58E+04 | 1.30E+04 | 4.08E+04 | 2.34E+04 |
| 2.42E+04 | 1.70E+04 | 3.38E+04 | 5.55E+06 | 5.28E+06 | 1.06E+07 | 5.21E+06 | 1.64E+07 | 8.14E+06 |
| 4.46E+04 | 1.85E+04 | 3.10E+04 | 5.85E+06 | 4.97E+06 | 6.09E+06 | 3.77E+06 | 1.54E+07 | 6.26E+06 |
| 9.00E+00 | 9.67E+02 | 9.00E+00 | 5.66E+05 | 3.53E+05 | 4.23E+05 | 2.24E+05 | 1.45E+06 | 4.17E+05 |
| 9.00E+00 | 9.00E+00 | 9.94E+02 | 3.75E+04 | 5.57E+04 | 7.60E+04 | 2.53E+04 | 1.96E+05 | 8.49E+04 |
| 9.00E+00 | 9.00E+00 | 9.00E+00 | 4.46E+05 | 3.46E+05 | 2.34E+06 | 4.68E+05 | 6.62E+05 | 4.50E+05 |
| 1.15E+04 | 9.00E+00 | 9.00E+00 | 2.35E+06 | 1.77E+06 | 4.72E+06 | 1.11E+06 | 4.86E+06 | 2.20E+06 |
| 1.66E+04 | 9.04E+03 | 1.60E+04 | 3.34E+06 | 2.36E+06 | 3.53E+06 | 2.37E+06 | 6.60E+06 | 3.29E+06 |
| 4.63E+04 | 2.86E+04 | 3.46E+04 | 1.05E+07 | 1.14E+07 | 5.48E+06 | 1.22E+07 | 2.21E+07 | 1.60E+07 |
| 9.00E+00 | 9.00E+00 | 9.00E+00 | 8.30E+04 | 6.57E+04 | 6.74E+04 | 9.83E+04 | 7.81E+04 | 1.14E+05 |
| 9.00E+00 | 9.00E+00 | 9.00E+00 | 4.49E+04 | 2.37E+04 | 3.71E+04 | 2.71E+04 | 8.13E+04 | 6.83E+04 |
| 6.87E+03 | 4.59E+03 | 8.51E+03 | 5.98E+05 | 4.00E+05 | 5.06E+05 | 1.99E+05 | 9.79E+05 | 5.41E+05 |
| 1.98E+03 | 9.00E+00 | 9.00E+00 | 5.23E+05 | 3.40E+05 | 2.91E+05 | 3.23E+05 | 1.09E+06 | 6.32E+05 |
| 9.00E+00 | 9.00E+00 | 9.00E+00 | 2.09E+06 | 1.43E+06 | 6.84E+05 | 5.56E+05 | 3.94E+06 | 1.19E+06 |
| 9.72E+04 | 1.45E+05 | 8.68E+04 | 2.86E+07 | 2.09E+07 | 1.25E+07 | 7.18E+06 | 3.79E+07 | 1.62E+07 |
| 9.00E+00 | 9.00E+00 | 9.00E+00 | 1.84E+04 | 1.76E+04 | 1.48E+04 | 1.50E+04 | 2.43E+04 | 1.75E+04 |
| 3.91E+03 | 2.48E+03 | 1.43E+03 | 1.93E+06 | 1.41E+06 | 8.93E+05 | 1.63E+06 | 4.48E+06 | 1.68E+06 |
| 9.00E+00 | 9.00E+00 | 9.85E+02 | 7.89E+04 | 2.78E+04 | 2.26E+04 | 1.92E+04 | 2.15E+04 | 3.36E+04 |
| 9.00E+00 | 9.00E+00 | 9.00E+00 | 4.82E+04 | 3.86E+04 | 9.63E+04 | 1.82E+04 | 1.05E+05 | 6.85E+04 |
| 9.00E+00 | 9.00E+00 | 9.96E+02 | 2.32E+05 | 2.05E+05 | 7.96E+04 | 1.49E+04 | 2.52E+05 | 6.66E+04 |
| 9.03E+02 | 1.28E+03 | 7.65E+02 | 2.65E+04 | 1.88E+04 | 8.78E+04 | 1.03E+04 | 3.41E+04 | 1.31E+04 |
| 9.00E+00 | 9.00E+00 | 9.00E+00 | 3.47E+04 | 1.35E+04 | 5.71E+04 | 9.72E+03 | 4.81E+04 | 2.74E+04 |
| 9.00E+00 | 3.50E+03 | 9.00E+00 | 2.72E+04 | 1.89E+04 | 1.12E+05 | 2.61E+04 | 2.26E+04 | 3.12E+04 |
| 2.47E+03 | 3.18E+03 | 4.54E+03 | 4.45E+05 | 2.80E+05 | 3.07E+05 | 1.23E+05 | 4.44E+05 | 2.79E+05 |
| 6.21E+04 | 1.69E+04 | 3.65E+04 | 3.75E+06 | 2.58E+06 | 2.78E+06 | 1.59E+06 | 1.23E+07 | 3.90E+06 |
| 9.00E+00 | 9.00E+00 | 9.00E+00 | 1.47E+05 | 1.19E+05 | 8.79E+04 | 8.54E+04 | 3.43E+05 | 1.37E+05 |
| 5.33E+02 | 9.00E+00 | 9.00E+00 | 4.47E+05 | 2.71E+05 | 2.24E+05 | 1.16E+05 | 6.46E+05 | 3.48E+05 |
| 9.00E+00 | 9.00E+00 | 9.00E+00 | 1.67E+05 | 1.28E+05 | 7.37E+04 | 3.86E+04 | 1.77E+05 | 1.29E+05 |
| 3.07E+03 | 1.06E+04 | 8.63E+03 | 4.31E+04 | 3.88E+04 | 2.74E+04 | 2.15E+04 | 4.14E+04 | 3.71E+04 |
| 4.53E+04 | 6.05E+04 | 5.66E+04 | 9.35E+05 | 8.60E+05 | 5.91E+05 | 7.03E+05 | 1.35E+06 | 1.07E+06 |
| 1.68E+04 | 1.22E+04 | 7.33E+03 | 2.67E+05 | 2.48E+05 | 1.35E+05 | 1.56E+05 | 2.87E+05 | 3.10E+05 |
| 9.00E+00 | 9.00E+00 | 1.10E+03 | 9.07E+04 | 6.09E+04 | 3.42E+05 | 6.09E+04 | 1.15E+05 | 1.21E+05 |

|          |          |          |          |          |          |          |          |          |
|----------|----------|----------|----------|----------|----------|----------|----------|----------|
| 3.28E+03 | 9.00E+00 | 9.00E+00 | 9.94E+04 | 9.00E+00 | 4.71E+04 | 9.00E+00 | 6.33E+04 | 4.22E+04 |
| 9.00E+00 | 9.00E+00 | 9.00E+00 | 4.11E+04 | 2.90E+04 | 1.21E+05 | 3.89E+04 | 4.75E+04 | 5.72E+04 |
| 2.37E+04 | 4.83E+04 | 3.08E+04 | 2.75E+06 | 2.45E+06 | 2.74E+06 | 2.93E+06 | 8.85E+06 | 3.70E+06 |
| 9.00E+00 | 9.00E+00 | 3.80E+03 | 9.80E+05 | 6.63E+05 | 1.54E+06 | 6.13E+05 | 2.58E+06 | 1.13E+06 |
| 9.00E+00 | 9.00E+00 | 9.00E+00 | 2.94E+06 | 2.01E+06 | 2.26E+06 | 1.82E+06 | 6.65E+06 | 4.14E+06 |
| 9.00E+00 | 9.00E+00 | 9.00E+00 | 1.29E+05 | 1.04E+05 | 2.01E+05 | 1.44E+05 | 2.35E+05 | 1.67E+05 |
| 9.00E+00 | 9.00E+00 | 9.00E+00 | 2.73E+05 | 1.77E+05 | 1.08E+05 | 3.00E+05 | 5.67E+05 | 3.27E+05 |
| 1.99E+04 | 2.14E+04 | 8.67E+03 | 9.45E+06 | 7.28E+06 | 4.12E+06 | 4.50E+06 | 1.84E+07 | 7.72E+06 |
| 9.00E+00 | 1.51E+03 | 3.04E+03 | 8.14E+04 | 7.00E+04 | 2.27E+04 | 6.51E+04 | 2.08E+05 | 1.25E+05 |
| 9.00E+00 | 1.41E+03 | 1.39E+03 | 7.39E+05 | 6.08E+05 | 2.31E+05 | 3.58E+05 | 1.32E+06 | 5.85E+05 |
| 9.00E+00 | 9.00E+00 | 9.00E+00 | 4.84E+04 | 5.40E+04 | 8.05E+03 | 2.32E+04 | 8.29E+04 | 1.79E+04 |
| 1.52E+04 | 3.37E+03 | 7.71E+03 | 8.38E+05 | 9.29E+05 | 3.61E+05 | 1.26E+06 | 1.64E+06 | 9.87E+05 |
| 9.00E+00 | 9.00E+00 | 9.00E+00 | 1.76E+05 | 1.30E+05 | 5.16E+04 | 1.12E+05 | 2.16E+05 | 1.00E+05 |
| 1.06E+04 | 6.60E+03 | 2.35E+03 | 2.46E+06 | 1.87E+06 | 7.59E+05 | 8.58E+05 | 2.23E+06 | 1.38E+06 |
| 9.00E+00 | 9.00E+00 | 9.00E+00 | 3.32E+05 | 1.60E+05 | 1.23E+05 | 1.19E+05 | 4.00E+05 | 2.23E+05 |
| 6.32E+04 | 6.78E+04 | 4.45E+04 | 1.92E+06 | 2.35E+06 | 7.65E+05 | 2.04E+06 | 2.76E+06 | 2.70E+06 |
| 9.00E+00 | 9.00E+00 | 9.00E+00 | 4.54E+04 | 2.45E+04 | 2.40E+04 | 2.61E+04 | 3.39E+04 | 3.62E+04 |
| 1.73E+04 | 4.63E+03 | 2.57E+03 | 3.16E+06 | 2.38E+06 | 1.21E+06 | 1.56E+06 | 5.62E+06 | 2.33E+06 |
| 5.11E+03 | 1.55E+03 | 6.20E+03 | 4.35E+05 | 2.75E+05 | 2.00E+05 | 1.25E+05 | 4.31E+05 | 2.11E+05 |
| 3.65E+03 | 8.94E+02 | 6.86E+03 | 3.08E+05 | 2.23E+05 | 8.88E+04 | 9.49E+04 | 2.30E+05 | 1.46E+05 |
| 2.75E+04 | 3.03E+04 | 2.09E+04 | 1.55E+06 | 1.22E+06 | 7.76E+05 | 4.00E+05 | 1.07E+06 | 6.30E+05 |
| 5.37E+04 | 5.05E+04 | 4.41E+04 | 3.74E+06 | 1.74E+06 | 1.68E+06 | 5.05E+05 | 1.68E+06 | 1.07E+06 |
| 9.00E+00 | 9.00E+00 | 9.00E+00 | 4.41E+05 | 4.23E+05 | 1.47E+05 | 1.66E+05 | 5.20E+05 | 3.03E+05 |
| 9.00E+00 | 1.77E+03 | 9.00E+00 | 9.12E+04 | 3.82E+04 | 3.64E+04 | 3.06E+04 | 9.03E+04 | 4.92E+04 |
| 3.23E+03 | 2.77E+03 | 4.58E+03 | 5.40E+05 | 4.87E+05 | 1.52E+06 | 1.90E+05 | 1.45E+06 | 6.82E+05 |
| 4.88E+03 | 5.09E+02 | 3.04E+03 | 3.87E+05 | 2.83E+05 | 6.64E+05 | 3.30E+05 | 1.35E+06 | 4.38E+05 |
| 6.46E+03 | 1.09E+03 | 3.68E+03 | 6.13E+04 | 4.95E+04 | 3.73E+04 | 5.00E+04 | 4.26E+04 | 5.62E+04 |
| 9.00E+00 | 9.00E+00 | 9.00E+00 | 2.35E+06 | 1.42E+06 | 9.00E+00 | 9.00E+00 | 9.00E+00 | 9.00E+00 |
| 9.00E+00 | 9.00E+00 | 9.00E+00 | 4.23E+05 | 2.69E+05 | 3.12E+05 | 1.65E+05 | 9.10E+05 | 4.09E+05 |
| 4.86E+03 | 9.00E+00 | 9.00E+00 | 1.21E+05 | 5.80E+04 | 4.19E+04 | 1.79E+04 | 1.31E+05 | 7.98E+04 |
| 9.00E+00 | 9.00E+00 | 9.00E+00 | 4.81E+05 | 3.79E+05 | 1.65E+06 | 3.97E+05 | 7.80E+05 | 4.27E+05 |
| 2.12E+03 | 9.00E+00 | 9.00E+00 | 1.71E+05 | 1.20E+05 | 1.36E+05 | 7.60E+04 | 3.19E+05 | 1.72E+05 |
| 1.51E+04 | 1.75E+04 | 2.22E+04 | 1.56E+06 | 9.86E+05 | 8.79E+05 | 3.53E+05 | 1.71E+06 | 9.29E+05 |
| 3.84E+03 | 9.00E+00 | 9.00E+00 | 3.83E+05 | 3.33E+05 | 1.66E+05 | 2.33E+05 | 8.88E+05 | 4.51E+05 |
| 9.00E+00 | 2.99E+03 | 9.00E+00 | 7.38E+03 | 6.59E+03 | 3.38E+04 | 1.24E+04 | 7.63E+03 | 8.37E+03 |
| 9.00E+00 | 9.00E+00 | 9.00E+00 | 3.56E+04 | 1.94E+04 | 1.01E+04 | 1.99E+04 | 3.55E+04 | 1.61E+04 |
| 9.00E+00 | 9.00E+00 | 9.00E+00 | 5.42E+03 | 8.12E+03 | 2.58E+04 | 1.22E+04 | 5.43E+03 | 1.08E+04 |
| 9.00E+00 | 9.00E+00 | 9.00E+00 | 2.13E+04 | 2.41E+04 | 8.03E+04 | 4.87E+04 | 2.37E+04 | 3.87E+04 |
| 1.16E+05 | 9.35E+04 | 1.04E+05 | 5.92E+04 | 7.61E+04 | 7.63E+04 | 7.51E+04 | 8.81E+04 | 9.66E+04 |
| 3.10E+04 | 2.67E+04 | 2.04E+04 | 1.95E+04 | 1.95E+04 | 1.35E+05 | 3.13E+04 | 3.37E+04 | 2.45E+04 |
| 1.41E+04 | 1.30E+04 | 5.83E+03 | 2.73E+04 | 3.02E+04 | 5.00E+05 | 3.75E+04 | 2.89E+04 | 1.80E+04 |
| 9.00E+00 | 9.00E+00 | 9.00E+00 | 6.11E+04 | 5.72E+04 | 3.07E+05 | 6.88E+04 | 1.26E+05 | 6.69E+04 |
| 4.62E+04 | 3.61E+04 | 6.66E+04 | 9.82E+04 | 7.91E+04 | 1.28E+06 | 7.89E+04 | 1.03E+05 | 4.76E+04 |
| 1.06E+04 | 8.43E+03 | 2.78E+04 | 5.75E+04 | 5.67E+04 | 5.46E+06 | 2.73E+04 | 5.12E+04 | 3.93E+04 |
| 2.02E+04 | 9.10E+03 | 1.07E+04 | 1.64E+05 | 1.74E+05 | 1.39E+06 | 1.52E+05 | 1.47E+05 | 1.38E+05 |
| 9.00E+00 | 9.00E+00 | 9.00E+00 | 2.33E+05 | 1.99E+05 | 8.91E+05 | 3.41E+05 | 3.08E+05 | 3.23E+05 |
| 5.76E+03 | 9.00E+00 | 3.99E+03 | 1.85E+04 | 2.81E+04 | 1.70E+06 | 6.22E+03 | 5.43E+04 | 1.38E+04 |
| 1.33E+03 | 3.13E+03 | 1.33E+03 | 8.37E+04 | 9.82E+04 | 4.49E+05 | 1.03E+05 | 1.91E+05 | 8.75E+04 |
| 2.31E+03 | 2.25E+03 | 4.28E+03 | 2.33E+05 | 2.85E+05 | 1.79E+05 | 2.99E+05 | 3.61E+05 | 4.25E+05 |
| 9.00E+00 | 3.60E+03 | 9.00E+00 | 8.65E+04 | 9.91E+04 | 2.59E+04 | 4.92E+04 | 4.87E+04 | 1.59E+05 |
| 9.00E+00 | 9.00E+00 | 9.00E+00 | 2.09E+04 | 9.44E+03 | 7.89E+03 | 4.41E+03 | 1.20E+04 | 1.32E+04 |
| 5.50E+03 | 5.60E+03 | 5.47E+03 | 4.27E+04 | 2.39E+04 | 4.30E+04 | 3.35E+04 | 2.52E+04 | 4.46E+04 |
| 1.41E+05 | 5.43E+04 | 9.00E+00 | 7.57E+06 | 2.94E+06 | 1.42E+06 | 1.88E+06 | 2.02E+06 | 2.89E+06 |
| 3.02E+04 | 2.01E+04 | 1.69E+04 | 2.15E+06 | 1.06E+06 | 1.86E+06 | 2.75E+06 | 2.13E+05 | 6.36E+05 |



|          |          |          |          |          |          |          |          |          |
|----------|----------|----------|----------|----------|----------|----------|----------|----------|
| 9.00E+00 | 9.00E+00 | 9.00E+00 | 4.98E+03 | 6.05E+03 | 8.02E+03 | 5.87E+03 | 5.15E+03 | 5.38E+03 |
| 9.00E+00 | 9.00E+00 | 9.00E+00 | 6.45E+06 | 3.51E+06 | 5.06E+06 | 1.26E+06 | 2.89E+06 | 2.11E+06 |
| 9.00E+00 | 9.00E+00 | 9.00E+00 | 5.76E+04 | 7.90E+04 | 1.08E+05 | 4.42E+04 | 7.40E+04 | 5.93E+04 |
| 8.54E+04 | 7.61E+04 | 1.36E+04 | 4.98E+04 | 4.44E+04 | 4.81E+04 | 3.97E+04 | 7.23E+04 | 5.52E+04 |

er

| MRL/mpj  |          |          |          |          |          |          |          |          |
|----------|----------|----------|----------|----------|----------|----------|----------|----------|
| C1       | C2       | C3       | C4       | C5       | C6       | QC01     | QC02     | QC03     |
| 1.39E+04 | 1.02E+04 | 2.06E+04 | 2.82E+04 | 2.04E+04 | 9.24E+03 | 1.58E+04 | 1.27E+04 | 1.17E+04 |
| 3.82E+04 | 3.55E+04 | 9.13E+04 | 9.13E+04 | 6.37E+04 | 5.12E+04 | 8.48E+04 | 8.42E+04 | 7.96E+04 |
| 6.23E+03 | 6.94E+03 | 9.62E+03 | 8.03E+03 | 7.51E+03 | 7.79E+03 | 1.58E+04 | 1.57E+04 | 1.26E+04 |
| 4.26E+03 | 4.09E+03 | 3.21E+03 | 5.25E+03 | 3.57E+03 | 4.79E+03 | 3.05E+03 | 3.74E+03 | 3.24E+03 |
| 1.06E+04 | 1.51E+04 | 1.93E+04 | 1.93E+04 | 1.87E+04 | 1.68E+04 | 4.50E+04 | 4.32E+04 | 4.44E+04 |
| 3.39E+04 | 3.71E+04 | 8.16E+04 | 5.98E+04 | 3.42E+04 | 5.97E+04 | 4.76E+04 | 5.22E+04 | 5.10E+04 |
| 2.15E+05 | 1.92E+05 | 2.07E+05 | 1.98E+05 | 1.81E+05 | 3.04E+05 | 1.50E+05 | 1.55E+05 | 1.64E+05 |
| 4.76E+03 | 4.32E+03 | 1.15E+04 | 8.58E+03 | 7.57E+03 | 7.15E+03 | 9.21E+03 | 7.91E+03 | 8.29E+03 |
| 3.10E+04 | 3.09E+04 | 3.48E+04 | 4.34E+04 | 3.93E+04 | 3.55E+04 | 2.37E+04 | 2.34E+04 | 2.04E+04 |
| 1.35E+05 | 1.77E+05 | 1.75E+05 | 1.49E+05 | 1.56E+05 | 1.34E+05 | 1.55E+05 | 1.63E+05 | 1.50E+05 |
| 2.58E+04 | 1.89E+04 | 2.45E+04 | 2.46E+04 | 1.76E+04 | 2.45E+04 | 9.66E+03 | 1.07E+04 | 1.15E+04 |
| 2.79E+04 | 3.12E+04 | 5.06E+04 | 4.95E+04 | 2.71E+04 | 3.55E+04 | 4.21E+04 | 4.10E+04 | 4.23E+04 |
| 1.77E+04 | 1.60E+04 | 2.90E+04 | 2.66E+04 | 2.66E+04 | 1.05E+04 | 1.54E+04 | 1.54E+04 | 1.70E+04 |
| 5.32E+04 | 5.32E+04 | 7.67E+04 | 6.03E+04 | 4.48E+04 | 5.20E+04 | 9.89E+04 | 7.73E+04 | 6.18E+04 |
| 3.24E+04 | 3.25E+04 | 2.12E+04 | 4.64E+04 | 4.06E+04 | 2.12E+04 | 3.93E+04 | 3.68E+04 | 5.14E+04 |
| 3.00E+05 | 3.88E+05 | 2.49E+05 | 2.94E+05 | 2.84E+05 | 1.91E+05 | 2.91E+05 | 2.25E+05 | 2.26E+05 |
| 3.24E+04 | 3.93E+04 | 4.59E+04 | 2.90E+04 | 2.37E+04 | 3.14E+04 | 3.71E+04 | 3.19E+04 | 3.79E+04 |
| 1.41E+04 | 8.42E+03 | 8.42E+03 | 1.17E+04 | 1.59E+04 | 8.65E+03 | 1.30E+04 | 8.20E+03 | 1.17E+04 |
| 1.17E+04 | 1.06E+04 | 1.54E+04 | 1.66E+04 | 1.06E+04 | 2.30E+04 | 2.34E+04 | 1.71E+04 | 1.31E+04 |
| 1.26E+05 | 1.60E+05 | 1.96E+05 | 1.35E+05 | 2.24E+05 | 2.10E+05 | 1.37E+05 | 2.07E+05 | 1.41E+05 |
| 1.36E+04 | 1.11E+04 | 1.71E+04 | 1.33E+04 | 1.21E+04 | 2.01E+04 | 1.45E+04 | 1.34E+04 | 1.38E+04 |
| 8.10E+03 | 1.72E+04 | 2.63E+04 | 1.30E+04 | 2.05E+04 | 1.20E+04 | 3.31E+04 | 3.60E+04 | 5.81E+04 |
| 5.76E+04 | 4.78E+04 | 6.75E+04 | 5.01E+04 | 8.78E+04 | 7.02E+04 | 1.36E+05 | 1.73E+05 | 1.34E+05 |
| 1.99E+04 | 1.33E+04 | 1.62E+04 | 1.28E+04 | 2.80E+04 | 1.06E+04 | 1.66E+04 | 1.74E+04 | 1.13E+04 |
| 3.66E+04 | 3.12E+04 | 6.41E+04 | 2.65E+04 | 1.00E+05 | 1.49E+05 | 1.52E+05 | 6.79E+04 | 1.10E+05 |
| 1.14E+06 | 1.07E+06 | 1.24E+06 | 1.01E+06 | 2.23E+06 | 1.95E+06 | 2.07E+06 | 2.34E+06 | 2.44E+06 |
| 4.88E+05 | 5.07E+05 | 6.14E+05 | 6.40E+05 | 5.48E+05 | 7.48E+05 | 2.63E+05 | 2.12E+05 | 1.61E+05 |
| 3.46E+05 | 2.90E+05 | 3.47E+05 | 4.57E+05 | 3.93E+05 | 4.65E+05 | 2.15E+05 | 2.05E+05 | 1.89E+05 |
| 7.00E+04 | 8.20E+04 | 7.59E+04 | 1.26E+05 | 8.29E+04 | 1.61E+05 | 2.54E+04 | 2.06E+04 | 1.84E+04 |
| 2.23E+05 | 2.09E+05 | 2.94E+05 | 3.84E+05 | 4.42E+05 | 4.15E+05 | 1.03E+05 | 7.65E+04 | 8.08E+04 |
| 1.38E+06 | 1.46E+06 | 1.51E+06 | 1.86E+06 | 1.67E+06 | 2.04E+06 | 9.69E+05 | 9.34E+05 | 8.69E+05 |
| 9.11E+05 | 9.75E+05 | 1.04E+06 | 1.05E+06 | 1.11E+06 | 1.43E+06 | 7.96E+05 | 9.10E+05 | 8.40E+05 |
| 3.31E+04 | 3.19E+04 | 6.76E+04 | 4.29E+04 | 5.10E+04 | 6.26E+04 | 3.52E+04 | 3.52E+04 | 3.11E+04 |
| 2.40E+04 | 2.05E+04 | 2.59E+04 | 4.43E+04 | 2.99E+04 | 3.90E+04 | 7.03E+03 | 8.01E+03 | 8.84E+03 |
| 3.41E+04 | 3.91E+04 | 3.90E+04 | 6.03E+04 | 4.30E+04 | 6.89E+04 | 2.01E+04 | 2.29E+04 | 2.63E+04 |
| 1.63E+05 | 1.48E+05 | 1.64E+05 | 2.48E+05 | 2.11E+05 | 2.88E+05 | 1.26E+05 | 1.09E+05 | 9.34E+04 |
| 4.27E+05 | 3.59E+05 | 4.54E+05 | 3.27E+05 | 4.11E+05 | 6.48E+05 | 4.61E+05 | 3.73E+05 | 3.78E+05 |
| 1.52E+05 | 1.48E+05 | 1.30E+05 | 1.18E+05 | 1.63E+05 | 1.99E+05 | 1.20E+05 | 8.42E+04 | 1.18E+05 |
| 2.59E+04 | 2.18E+04 | 3.16E+04 | 4.68E+04 | 3.00E+04 | 4.14E+04 | 1.48E+04 | 1.86E+04 | 2.13E+04 |
| 2.41E+06 | 2.81E+06 | 3.63E+06 | 3.56E+06 | 3.12E+06 | 2.99E+06 | 1.39E+06 | 1.17E+06 | 1.25E+06 |
| 3.41E+03 | 3.91E+03 | 3.62E+03 | 4.44E+03 | 3.87E+03 | 3.75E+03 | 1.62E+03 | 1.62E+03 | 1.98E+03 |
| 9.00E+00 | 9.00E+00 | 9.04E+03 | 9.00E+00 | 9.00E+00 | 9.00E+00 | 1.87E+04 | 1.52E+04 | 1.62E+04 |
| 7.63E+04 | 7.72E+04 | 3.50E+04 | 5.09E+04 | 6.14E+04 | 4.77E+04 | 1.85E+04 | 1.89E+04 | 2.05E+04 |
| 3.71E+05 | 3.54E+05 | 2.65E+05 | 2.36E+05 | 3.39E+05 | 3.53E+05 | 3.17E+05 | 3.23E+05 | 3.23E+05 |
| 9.00E+00 | 9.00E+00 | 9.00E+00 | 9.00E+00 | 9.00E+00 | 9.00E+00 | 4.89E+04 | 4.55E+04 | 4.65E+04 |
| 9.00E+00 | 9.00E+00 | 9.00E+00 | 9.00E+00 | 1.54E+04 | 9.00E+00 | 2.34E+04 | 2.84E+04 | 1.98E+04 |
| 3.09E+05 | 3.64E+05 | 3.35E+05 | 3.28E+05 | 3.56E+05 | 3.86E+05 | 4.82E+05 | 4.81E+05 | 4.32E+05 |
| 9.00E+00 | 9.00E+00 | 9.00E+00 | 9.00E+00 | 9.00E+00 | 9.00E+00 | 3.19E+04 | 3.89E+04 | 3.29E+04 |
| 9.00E+00 | 9.00E+00 | 1.29E+04 | 1.01E+04 | 9.00E+00 | 9.00E+00 | 3.94E+04 | 4.37E+04 | 4.11E+04 |
| 2.19E+04 | 2.23E+04 | 3.33E+04 | 3.02E+04 | 2.87E+04 | 2.14E+04 | 1.55E+06 | 1.57E+06 | 1.46E+06 |

|          |          |          |          |          |          |          |          |          |
|----------|----------|----------|----------|----------|----------|----------|----------|----------|
| 7.04E+03 | 9.05E+03 | 7.91E+03 | 4.54E+03 | 9.75E+03 | 7.70E+03 | 7.85E+04 | 7.67E+04 | 7.69E+04 |
| 9.00E+00 | 7.13E+03 | 9.00E+00 | 1.01E+04 | 9.00E+00 | 9.00E+00 | 2.46E+04 | 2.28E+04 | 2.72E+04 |
| 9.00E+00 | 9.00E+00 | 9.00E+00 | 9.00E+00 | 9.00E+00 | 9.00E+00 | 4.91E+04 | 5.33E+04 | 5.50E+04 |
| 9.00E+00 | 9.00E+00 | 9.00E+00 | 9.00E+00 | 9.00E+00 | 9.00E+00 | 1.35E+04 | 1.64E+04 | 1.59E+04 |
| 6.77E+04 | 9.82E+04 | 1.99E+05 | 2.06E+05 | 8.16E+04 | 5.10E+04 | 3.85E+05 | 3.86E+05 | 3.65E+05 |
| 3.94E+05 | 4.06E+05 | 6.52E+05 | 7.18E+05 | 5.38E+05 | 3.49E+05 | 6.39E+06 | 6.32E+06 | 5.90E+06 |
| 4.32E+04 | 4.54E+04 | 6.83E+04 | 7.47E+04 | 3.57E+04 | 3.75E+04 | 5.28E+05 | 5.44E+05 | 5.30E+05 |
| 2.59E+04 | 3.28E+04 | 5.69E+04 | 5.92E+04 | 1.49E+04 | 3.19E+04 | 1.14E+05 | 1.14E+05 | 1.19E+05 |
| 9.00E+00 | 9.00E+00 | 1.26E+04 | 1.07E+04 | 9.00E+00 | 9.00E+00 | 2.62E+04 | 1.85E+04 | 2.00E+04 |
| 9.50E+03 | 9.42E+03 | 1.15E+04 | 1.16E+04 | 1.13E+04 | 9.15E+03 | 7.67E+04 | 7.59E+04 | 7.20E+04 |
| 9.00E+00 | 9.00E+00 | 9.00E+00 | 9.00E+00 | 9.00E+00 | 9.00E+00 | 6.33E+04 | 6.63E+04 | 6.47E+04 |
| 2.35E+04 | 3.13E+04 | 6.81E+04 | 4.68E+04 | 4.54E+04 | 2.38E+04 | 1.94E+05 | 1.80E+05 | 1.71E+05 |
| 3.15E+05 | 2.66E+05 | 4.28E+05 | 4.28E+05 | 4.53E+05 | 3.11E+05 | 3.25E+06 | 3.24E+06 | 3.18E+06 |
| 2.15E+05 | 2.58E+05 | 4.49E+05 | 4.53E+05 | 2.37E+05 | 2.06E+05 | 3.66E+06 | 3.47E+06 | 3.25E+06 |
| 3.85E+04 | 6.64E+04 | 1.21E+05 | 1.19E+05 | 3.98E+04 | 3.53E+04 | 3.98E+05 | 3.87E+05 | 3.63E+05 |
| 1.58E+05 | 1.81E+05 | 2.42E+05 | 2.75E+05 | 2.42E+05 | 1.74E+05 | 5.25E+05 | 5.25E+05 | 5.06E+05 |
| 4.23E+04 | 6.00E+04 | 9.95E+04 | 1.05E+05 | 6.72E+04 | 5.04E+04 | 2.08E+05 | 2.07E+05 | 2.03E+05 |
| 9.00E+00 | 9.00E+00 | 9.00E+00 | 9.00E+00 | 9.00E+00 | 9.00E+00 | 1.88E+04 | 1.97E+04 | 1.58E+04 |
| 9.00E+00 | 9.00E+00 | 9.00E+00 | 9.00E+00 | 9.00E+00 | 9.00E+00 | 3.51E+04 | 2.98E+04 | 2.88E+04 |
| 3.17E+04 | 2.64E+04 | 4.93E+04 | 4.56E+04 | 4.15E+04 | 3.94E+04 | 1.92E+05 | 1.86E+05 | 1.82E+05 |
| 9.00E+00 | 9.00E+00 | 9.00E+00 | 9.00E+00 | 9.00E+00 | 9.00E+00 | 7.89E+04 | 8.01E+04 | 7.48E+04 |
| 1.99E+04 | 3.07E+04 | 3.36E+04 | 3.74E+04 | 2.58E+04 | 2.41E+04 | 5.71E+04 | 5.91E+04 | 5.37E+04 |
| 2.65E+05 | 2.68E+05 | 3.93E+05 | 3.74E+05 | 3.27E+05 | 2.96E+05 | 1.58E+06 | 1.60E+06 | 1.60E+06 |
| 1.30E+04 | 2.13E+04 | 4.78E+04 | 3.99E+04 | 3.77E+04 | 1.88E+04 | 6.58E+04 | 7.00E+04 | 5.74E+04 |
| 1.66E+05 | 1.14E+05 | 1.93E+05 | 2.21E+05 | 1.51E+05 | 1.39E+05 | 8.68E+04 | 9.05E+04 | 8.92E+04 |
| 2.32E+04 | 3.37E+04 | 3.69E+04 | 4.83E+04 | 3.09E+04 | 3.40E+04 | 6.71E+04 | 6.34E+04 | 6.24E+04 |
| 1.48E+04 | 1.84E+04 | 3.05E+04 | 2.42E+04 | 2.76E+04 | 2.09E+04 | 3.14E+04 | 3.17E+04 | 3.11E+04 |
| 8.21E+05 | 6.91E+05 | 4.99E+05 | 6.50E+05 | 8.24E+05 | 9.41E+05 | 4.69E+05 | 5.04E+05 | 4.76E+05 |
| 9.00E+00 | 9.00E+00 | 9.00E+00 | 9.00E+00 | 8.57E+03 | 9.00E+00 | 2.83E+04 | 3.02E+04 | 3.10E+04 |
| 9.00E+00 | 9.00E+00 | 9.00E+00 | 3.87E+03 | 9.00E+00 | 9.00E+00 | 6.92E+03 | 8.35E+03 | 7.71E+03 |
| 9.00E+00 | 9.00E+00 | 9.00E+00 | 9.00E+00 | 9.00E+00 | 9.00E+00 | 6.86E+04 | 5.98E+04 | 6.00E+04 |
| 9.00E+00 | 9.00E+00 | 9.00E+00 | 9.00E+00 | 9.00E+00 | 9.00E+00 | 1.86E+04 | 1.92E+04 | 2.31E+04 |
| 3.25E+04 | 3.06E+04 | 4.74E+04 | 5.05E+04 | 3.47E+04 | 2.80E+04 | 1.18E+05 | 1.19E+05 | 1.20E+05 |
| 1.18E+05 | 1.10E+05 | 1.58E+05 | 1.31E+05 | 8.25E+04 | 9.61E+04 | 1.50E+06 | 1.53E+06 | 1.45E+06 |
| 2.00E+05 | 2.30E+05 | 2.77E+05 | 3.05E+05 | 1.52E+05 | 1.91E+05 | 2.08E+05 | 2.06E+05 | 1.89E+05 |
| 8.41E+04 | 6.98E+04 | 1.46E+05 | 1.05E+05 | 7.73E+04 | 6.52E+04 | 1.69E+05 | 1.68E+05 | 1.64E+05 |
| 1.01E+05 | 7.53E+04 | 1.68E+05 | 1.20E+05 | 7.78E+04 | 6.36E+04 | 1.91E+05 | 1.89E+05 | 1.85E+05 |
| 6.86E+04 | 6.93E+04 | 7.93E+04 | 5.59E+04 | 5.83E+04 | 6.15E+04 | 7.51E+04 | 8.47E+04 | 7.37E+04 |
| 1.27E+05 | 1.28E+05 | 1.03E+05 | 1.18E+05 | 1.43E+05 | 1.20E+05 | 1.70E+05 | 1.71E+05 | 1.60E+05 |
| 1.15E+05 | 1.15E+05 | 9.11E+04 | 1.05E+05 | 1.21E+05 | 1.03E+05 | 1.59E+05 | 1.42E+05 | 1.45E+05 |
| 1.56E+06 | 1.80E+06 | 1.68E+06 | 1.66E+06 | 1.76E+06 | 2.04E+06 | 2.42E+06 | 2.33E+06 | 2.18E+06 |
| 4.57E+04 | 1.79E+04 | 5.71E+04 | 2.85E+04 | 1.94E+04 | 2.29E+04 | 2.48E+04 | 2.48E+04 | 2.20E+04 |
| 7.35E+06 | 7.26E+06 | 7.02E+06 | 7.47E+06 | 7.79E+06 | 8.22E+06 | 9.27E+06 | 9.18E+06 | 9.00E+06 |
| 4.15E+05 | 4.40E+05 | 4.86E+05 | 4.28E+05 | 4.84E+05 | 5.44E+05 | 5.81E+05 | 6.00E+05 | 5.45E+05 |
| 6.37E+04 | 5.40E+04 | 4.52E+04 | 4.67E+04 | 6.27E+04 | 6.55E+04 | 4.82E+04 | 5.06E+04 | 4.73E+04 |
| 2.39E+04 | 1.76E+04 | 1.79E+04 | 1.71E+04 | 1.57E+04 | 1.89E+04 | 2.79E+04 | 2.75E+04 | 2.62E+04 |
| 1.14E+04 | 1.19E+04 | 1.64E+04 | 1.63E+04 | 1.16E+04 | 9.07E+03 | 8.98E+03 | 1.51E+04 | 1.33E+04 |
| 2.31E+04 | 2.73E+04 | 2.42E+04 | 2.20E+04 | 2.10E+04 | 1.93E+04 | 2.76E+04 | 2.61E+04 | 2.55E+04 |
| 9.63E+03 | 1.62E+04 | 1.84E+04 | 1.06E+04 | 1.12E+04 | 1.26E+04 | 1.42E+04 | 1.57E+04 | 1.37E+04 |
| 3.58E+04 | 2.99E+04 | 3.97E+04 | 4.11E+04 | 6.58E+04 | 3.97E+04 | 6.91E+04 | 7.82E+04 | 7.13E+04 |
| 4.03E+04 | 3.19E+04 | 4.16E+04 | 5.70E+04 | 2.96E+04 | 4.09E+04 | 2.11E+04 | 1.95E+04 | 2.07E+04 |
| 1.30E+05 | 1.52E+05 | 2.34E+05 | 1.88E+05 | 2.09E+05 | 2.11E+05 | 1.29E+05 | 1.33E+05 | 1.34E+05 |
| 2.37E+04 | 2.66E+04 | 2.04E+04 | 3.15E+04 | 2.27E+04 | 3.94E+04 | 1.15E+04 | 2.16E+04 | 1.42E+04 |
| 1.54E+04 | 8.54E+03 | 2.67E+03 | 6.38E+03 | 1.46E+04 | 1.51E+04 | 6.03E+04 | 6.24E+04 | 6.35E+04 |

|          |          |          |          |          |          |          |          |          |
|----------|----------|----------|----------|----------|----------|----------|----------|----------|
| 1.45E+04 | 7.06E+03 | 1.56E+04 | 1.54E+04 | 1.11E+04 | 2.28E+04 | 8.46E+04 | 9.81E+04 | 7.20E+04 |
| 5.98E+04 | 4.26E+04 | 4.83E+04 | 4.75E+04 | 5.03E+04 | 5.23E+04 | 4.43E+04 | 5.97E+04 | 4.88E+04 |
| 4.95E+04 | 5.22E+04 | 3.75E+04 | 4.36E+04 | 6.22E+04 | 3.06E+04 | 1.84E+04 | 1.63E+04 | 3.31E+04 |
| 5.30E+04 | 6.16E+04 | 5.20E+04 | 6.91E+04 | 5.82E+04 | 6.61E+04 | 4.83E+04 | 5.44E+04 | 3.81E+04 |
| 9.45E+04 | 8.18E+04 | 9.95E+04 | 1.05E+05 | 1.07E+05 | 1.29E+05 | 1.10E+05 | 1.30E+05 | 7.80E+04 |
| 1.01E+04 | 4.60E+03 | 9.63E+03 | 1.01E+04 | 1.17E+04 | 1.41E+04 | 1.17E+04 | 1.84E+04 | 1.44E+04 |
| 3.60E+04 | 1.45E+04 | 2.80E+04 | 3.15E+04 | 2.84E+04 | 2.84E+04 | 1.46E+04 | 3.92E+04 | 2.26E+04 |
| 2.19E+04 | 8.08E+03 | 2.89E+04 | 1.51E+04 | 3.03E+04 | 2.94E+04 | 2.65E+04 | 2.39E+04 | 1.68E+04 |
| 5.23E+03 | 5.28E+03 | 1.09E+04 | 3.93E+03 | 5.27E+03 | 8.14E+03 | 8.42E+03 | 1.36E+04 | 8.93E+03 |
| 1.62E+04 | 9.00E+03 | 2.12E+04 | 2.70E+03 | 9.23E+03 | 1.18E+04 | 9.69E+03 | 1.15E+04 | 1.50E+04 |
| 1.06E+06 | 8.90E+05 | 1.20E+06 | 1.06E+06 | 1.03E+06 | 1.51E+06 | 9.68E+05 | 1.09E+06 | 1.10E+06 |
| 2.54E+05 | 1.96E+05 | 2.81E+05 | 2.35E+05 | 3.04E+05 | 2.60E+05 | 8.00E+05 | 8.93E+05 | 8.76E+05 |
| 1.14E+05 | 9.52E+04 | 1.38E+05 | 1.37E+05 | 1.28E+05 | 1.59E+05 | 9.64E+04 | 9.17E+04 | 9.48E+04 |
| 3.03E+04 | 2.88E+04 | 4.14E+04 | 2.96E+04 | 2.94E+04 | 4.73E+04 | 3.13E+04 | 3.30E+04 | 2.41E+04 |
| 6.87E+03 | 7.57E+03 | 1.12E+04 | 9.00E+00 | 1.21E+04 | 1.75E+04 | 3.79E+04 | 4.02E+04 | 2.71E+04 |
| 2.13E+05 | 1.94E+05 | 2.23E+05 | 2.22E+05 | 2.45E+05 | 2.40E+05 | 2.28E+05 | 2.32E+05 | 1.81E+05 |
| 6.96E+04 | 5.38E+04 | 6.94E+04 | 4.04E+04 | 7.31E+04 | 6.26E+04 | 4.63E+04 | 6.72E+04 | 4.26E+04 |
| 1.48E+06 | 1.51E+06 | 1.70E+06 | 1.46E+06 | 1.65E+06 | 2.01E+06 | 1.50E+06 | 1.47E+06 | 1.38E+06 |
| 3.76E+05 | 3.72E+05 | 3.87E+05 | 4.25E+05 | 4.08E+05 | 3.37E+05 | 2.72E+05 | 3.11E+05 | 2.74E+05 |
| 2.47E+04 | 8.34E+04 | 2.58E+04 | 5.22E+04 | 3.89E+04 | 4.24E+04 | 1.76E+04 | 1.90E+04 | 1.13E+04 |
| 3.76E+05 | 3.00E+05 | 4.41E+05 | 5.07E+05 | 3.45E+05 | 4.02E+05 | 2.08E+05 | 1.96E+05 | 2.03E+05 |
| 9.00E+00 | 9.00E+00 | 9.00E+00 | 2.26E+03 | 9.00E+00 | 9.00E+00 | 6.60E+04 | 6.46E+04 | 4.74E+04 |
| 1.81E+05 | 7.33E+04 | 1.42E+05 | 2.35E+05 | 9.51E+04 | 1.06E+05 | 5.31E+05 | 4.81E+05 | 4.91E+05 |
| 1.88E+05 | 1.51E+05 | 2.27E+05 | 1.88E+05 | 2.29E+05 | 1.87E+05 | 4.96E+06 | 6.03E+06 | 5.20E+06 |
| 1.09E+04 | 3.95E+03 | 2.18E+03 | 8.85E+03 | 9.16E+03 | 1.52E+04 | 7.67E+05 | 7.91E+05 | 7.29E+05 |
| 4.55E+04 | 5.20E+04 | 3.19E+04 | 4.94E+04 | 4.74E+04 | 1.96E+04 | 3.39E+04 | 4.07E+04 | 3.26E+04 |
| 9.18E+04 | 4.41E+04 | 9.97E+04 | 1.41E+05 | 6.21E+04 | 7.22E+04 | 4.88E+04 | 4.29E+04 | 5.51E+04 |
| 9.00E+00 | 9.00E+00 | 9.00E+00 | 9.00E+00 | 9.00E+00 | 9.00E+00 | 9.24E+04 | 1.07E+05 | 8.77E+04 |
| 5.55E+05 | 3.37E+05 | 3.31E+05 | 6.23E+05 | 3.08E+05 | 4.11E+05 | 1.89E+05 | 1.96E+05 | 1.79E+05 |
| 6.22E+04 | 5.64E+04 | 4.66E+04 | 7.95E+04 | 5.45E+04 | 8.63E+04 | 2.94E+04 | 3.60E+04 | 2.62E+04 |
| 7.31E+04 | 8.07E+04 | 8.50E+04 | 1.01E+05 | 7.05E+04 | 8.15E+04 | 5.90E+04 | 6.13E+04 | 5.53E+04 |
| 5.86E+05 | 4.28E+05 | 4.20E+05 | 7.48E+05 | 3.88E+05 | 4.69E+05 | 3.13E+05 | 2.10E+05 | 2.47E+05 |
| 1.04E+06 | 8.29E+05 | 1.02E+06 | 1.51E+06 | 7.54E+05 | 1.07E+06 | 7.38E+05 | 6.95E+05 | 6.54E+05 |
| 3.25E+04 | 3.25E+04 | 5.47E+04 | 5.02E+04 | 4.09E+04 | 6.03E+04 | 8.38E+04 | 7.54E+04 | 7.98E+04 |
| 5.58E+04 | 3.68E+04 | 5.63E+04 | 4.65E+04 | 5.56E+04 | 6.56E+04 | 8.41E+04 | 9.14E+04 | 6.56E+04 |
| 6.11E+04 | 7.88E+04 | 7.24E+04 | 1.24E+05 | 1.16E+05 | 8.91E+04 | 1.14E+05 | 1.40E+05 | 1.15E+05 |
| 3.95E+04 | 4.18E+04 | 4.65E+04 | 5.36E+04 | 4.80E+04 | 4.87E+04 | 5.39E+04 | 6.89E+04 | 3.82E+04 |
| 4.21E+06 | 4.29E+06 | 5.02E+06 | 4.40E+06 | 4.60E+06 | 6.17E+06 | 3.69E+06 | 3.69E+06 | 2.91E+06 |
| 9.06E+03 | 9.00E+00 | 5.46E+03 | 8.60E+03 | 5.05E+03 | 4.66E+03 | 3.11E+04 | 2.40E+04 | 2.00E+04 |
| 1.63E+05 | 1.49E+05 | 2.08E+05 | 1.92E+05 | 1.93E+05 | 2.44E+05 | 2.37E+05 | 2.80E+05 | 2.21E+05 |
| 9.66E+04 | 8.44E+04 | 1.29E+05 | 1.32E+05 | 1.47E+05 | 1.59E+05 | 3.50E+05 | 3.58E+05 | 3.50E+05 |
| 2.05E+04 | 1.35E+04 | 2.35E+04 | 1.82E+04 | 2.94E+04 | 1.41E+04 | 1.09E+05 | 1.21E+05 | 1.22E+05 |
| 3.64E+06 | 3.04E+06 | 4.58E+06 | 3.93E+06 | 5.02E+06 | 4.51E+06 | 9.79E+07 | 1.06E+08 | 1.01E+08 |
| 9.00E+00 | 9.00E+00 | 1.02E+04 | 9.00E+00 | 8.47E+03 | 9.00E+00 | 1.44E+06 | 1.19E+06 | 1.29E+06 |
| 1.64E+05 | 1.38E+05 | 2.22E+05 | 1.83E+05 | 1.41E+05 | 2.50E+05 | 4.15E+05 | 4.08E+05 | 3.77E+05 |
| 1.09E+06 | 1.45E+06 | 2.44E+06 | 2.14E+06 | 1.04E+06 | 2.31E+06 | 3.48E+06 | 3.71E+06 | 3.53E+06 |
| 7.55E+04 | 6.94E+04 | 9.36E+04 | 7.29E+04 | 6.26E+04 | 9.19E+04 | 4.31E+06 | 4.01E+06 | 3.70E+06 |
| 7.26E+05 | 6.87E+05 | 6.77E+05 | 9.26E+05 | 7.68E+05 | 8.76E+05 | 5.69E+05 | 5.22E+05 | 5.87E+05 |
| 3.97E+05 | 3.14E+05 | 5.33E+05 | 4.54E+05 | 3.31E+05 | 5.66E+05 | 4.95E+05 | 4.93E+05 | 4.01E+05 |
| 9.00E+00 | 9.00E+00 | 9.00E+00 | 9.00E+00 | 9.00E+00 | 9.00E+00 | 6.51E+04 | 5.96E+04 | 5.16E+04 |
| 9.82E+06 | 8.49E+06 | 8.64E+06 | 1.21E+07 | 1.04E+07 | 1.08E+07 | 7.25E+06 | 8.01E+06 | 7.60E+06 |
| 1.54E+05 | 1.16E+05 | 7.65E+05 | 6.42E+05 | 5.79E+05 | 7.70E+05 | 1.98E+07 | 1.86E+07 | 1.81E+07 |
| 2.25E+05 | 1.79E+05 | 2.94E+05 | 2.74E+05 | 2.45E+05 | 2.97E+05 | 3.67E+05 | 3.87E+05 | 3.34E+05 |
| 1.26E+04 | 5.87E+03 | 1.17E+04 | 6.76E+03 | 8.98E+03 | 9.21E+03 | 9.64E+05 | 7.35E+05 | 6.89E+05 |

|          |          |          |          |          |          |          |          |          |
|----------|----------|----------|----------|----------|----------|----------|----------|----------|
| 7.58E+06 | 4.79E+06 | 8.15E+06 | 6.86E+06 | 6.53E+06 | 5.93E+06 | 4.65E+06 | 4.79E+06 | 4.78E+06 |
| 8.12E+05 | 7.30E+05 | 1.10E+06 | 6.35E+05 | 7.87E+05 | 1.02E+06 | 3.65E+06 | 3.31E+06 | 3.04E+06 |
| 1.88E+05 | 1.81E+05 | 5.92E+04 | 2.19E+05 | 4.82E+04 | 2.65E+05 | 6.81E+04 | 1.35E+05 | 1.10E+05 |
| 1.42E+07 | 1.36E+07 | 1.11E+07 | 1.64E+07 | 1.60E+07 | 1.64E+07 | 9.03E+06 | 8.53E+06 | 8.23E+06 |
| 1.90E+07 | 1.99E+07 | 2.03E+07 | 1.58E+07 | 2.01E+07 | 2.74E+07 | 3.32E+07 | 3.31E+07 | 3.06E+07 |
| 3.00E+06 | 3.16E+06 | 4.28E+06 | 3.84E+06 | 3.90E+06 | 4.57E+06 | 7.09E+06 | 7.26E+06 | 6.98E+06 |
| 6.80E+04 | 4.43E+04 | 5.92E+04 | 6.80E+04 | 5.92E+04 | 8.74E+04 | 8.55E+04 | 7.84E+04 | 5.98E+04 |
| 1.69E+06 | 2.37E+06 | 2.16E+06 | 2.41E+06 | 1.95E+06 | 2.68E+06 | 1.26E+06 | 1.13E+06 | 1.27E+06 |
| 1.64E+06 | 1.45E+06 | 1.70E+06 | 1.55E+06 | 1.65E+06 | 1.92E+06 | 1.68E+06 | 1.42E+06 | 1.41E+06 |
| 2.39E+05 | 2.31E+05 | 2.91E+05 | 2.79E+05 | 1.63E+05 | 2.65E+05 | 1.05E+05 | 1.33E+05 | 1.01E+05 |
| 4.16E+04 | 4.50E+04 | 1.84E+04 | 4.41E+04 | 4.45E+04 | 3.77E+04 | 4.74E+04 | 4.69E+04 | 4.43E+04 |
| 5.86E+04 | 7.21E+04 | 7.42E+04 | 6.21E+04 | 7.82E+04 | 6.77E+04 | 7.20E+04 | 6.37E+04 | 4.77E+04 |
| 6.61E+05 | 5.53E+05 | 4.45E+05 | 6.24E+05 | 3.52E+05 | 3.81E+05 | 1.63E+05 | 1.49E+05 | 1.60E+05 |
| 6.21E+03 | 1.28E+04 | 1.32E+04 | 1.34E+04 | 1.49E+04 | 1.51E+04 | 1.67E+04 | 2.15E+04 | 1.76E+04 |
| 1.32E+05 | 1.31E+05 | 1.45E+05 | 1.54E+05 | 1.35E+05 | 2.35E+05 | 2.21E+05 | 1.83E+05 | 1.86E+05 |
| 5.59E+03 | 6.21E+03 | 1.39E+04 | 4.31E+03 | 1.11E+04 | 3.11E+03 | 3.89E+04 | 5.38E+04 | 3.64E+04 |
| 1.55E+05 | 1.38E+05 | 1.98E+05 | 1.67E+05 | 1.97E+05 | 1.90E+05 | 1.88E+07 | 1.93E+07 | 1.90E+07 |
| 3.89E+04 | 2.93E+04 | 4.77E+04 | 3.32E+04 | 3.82E+04 | 7.05E+04 | 2.63E+05 | 2.74E+05 | 2.95E+05 |
| 1.66E+05 | 1.28E+05 | 1.79E+05 | 1.62E+05 | 1.85E+05 | 2.04E+05 | 1.28E+06 | 1.16E+06 | 1.27E+06 |
| 5.44E+04 | 4.60E+04 | 4.88E+04 | 3.71E+04 | 4.28E+04 | 6.76E+04 | 1.62E+05 | 1.53E+05 | 1.49E+05 |
| 5.32E+04 | 5.85E+04 | 4.85E+04 | 7.23E+04 | 6.50E+04 | 6.64E+04 | 4.68E+04 | 5.23E+04 | 5.56E+04 |
| 9.14E+05 | 8.46E+05 | 9.84E+05 | 9.59E+05 | 9.85E+05 | 1.08E+06 | 9.95E+05 | 9.74E+05 | 8.81E+05 |
| 7.46E+04 | 5.99E+04 | 1.11E+05 | 9.39E+04 | 6.17E+04 | 1.03E+05 | 5.80E+05 | 5.75E+05 | 5.56E+05 |
| 9.40E+05 | 9.27E+05 | 8.88E+05 | 1.02E+06 | 1.12E+06 | 9.52E+05 | 6.28E+05 | 7.33E+05 | 6.46E+05 |
| 9.64E+04 | 8.97E+04 | 1.05E+05 | 9.07E+04 | 1.10E+05 | 6.28E+04 | 1.78E+05 | 1.88E+05 | 1.88E+05 |
| 1.38E+06 | 1.36E+06 | 1.53E+06 | 1.60E+06 | 1.71E+06 | 1.66E+06 | 1.14E+06 | 1.24E+06 | 1.36E+06 |
| 1.28E+06 | 1.33E+06 | 1.49E+06 | 1.25E+06 | 1.43E+06 | 1.70E+06 | 2.41E+06 | 2.79E+06 | 2.66E+06 |
| 1.62E+05 | 1.77E+05 | 2.54E+05 | 2.05E+05 | 2.18E+05 | 2.75E+05 | 3.48E+05 | 3.59E+05 | 3.42E+05 |
| 3.06E+05 | 3.70E+05 | 3.06E+05 | 3.38E+05 | 3.16E+05 | 4.11E+05 | 1.91E+05 | 1.90E+05 | 2.17E+05 |
| 9.15E+04 | 7.05E+04 | 1.23E+05 | 1.14E+05 | 1.00E+05 | 1.19E+05 | 1.32E+05 | 1.34E+05 | 1.33E+05 |
| 6.89E+04 | 5.38E+04 | 6.82E+04 | 4.16E+04 | 2.94E+04 | 5.20E+04 | 6.51E+04 | 4.14E+04 | 4.10E+04 |
| 1.68E+04 | 8.55E+03 | 1.73E+04 | 1.77E+04 | 1.16E+04 | 2.38E+04 | 1.20E+04 | 1.63E+04 | 1.69E+04 |
| 1.06E+04 | 3.80E+03 | 7.71E+03 | 9.43E+03 | 9.97E+03 | 9.92E+03 | 2.64E+05 | 2.55E+05 | 2.47E+05 |
| 3.35E+04 | 6.85E+04 | 8.45E+04 | 8.53E+04 | 7.89E+04 | 8.06E+04 | 6.89E+04 | 7.06E+04 | 7.82E+04 |
| 6.05E+04 | 3.08E+04 | 8.80E+04 | 6.58E+04 | 5.14E+04 | 1.08E+05 | 5.11E+04 | 4.60E+04 | 4.38E+04 |
| 2.19E+05 | 1.16E+05 | 1.86E+05 | 1.42E+05 | 1.53E+05 | 1.89E+05 | 1.93E+05 | 1.66E+05 | 1.79E+05 |
| 5.82E+03 | 3.24E+03 | 1.04E+04 | 1.06E+04 | 7.35E+03 | 8.44E+03 | 6.13E+04 | 5.45E+04 | 5.58E+04 |
| 4.25E+03 | 7.03E+03 | 4.71E+03 | 5.45E+03 | 5.83E+03 | 3.50E+03 | 4.48E+04 | 2.97E+04 | 1.82E+04 |
| 2.93E+03 | 9.00E+00 | 9.00E+00 | 9.00E+00 | 9.00E+00 | 9.00E+00 | 1.72E+04 | 6.34E+03 | 1.20E+04 |
| 2.49E+04 | 2.62E+04 | 3.77E+04 | 2.26E+04 | 4.25E+04 | 4.98E+04 | 9.15E+04 | 6.53E+04 | 5.86E+04 |
| 9.00E+00 | 9.00E+00 | 9.00E+00 | 9.00E+00 | 9.00E+00 | 9.00E+00 | 1.05E+05 | 1.25E+05 | 9.30E+04 |
| 9.94E+04 | 1.15E+05 | 1.35E+05 | 8.65E+04 | 1.32E+05 | 1.33E+05 | 1.85E+05 | 1.88E+05 | 1.80E+05 |
| 3.94E+04 | 1.86E+04 | 2.63E+04 | 3.69E+04 | 2.86E+04 | 2.65E+04 | 2.76E+04 | 1.84E+04 | 2.08E+04 |
| 4.70E+04 | 3.61E+04 | 3.51E+04 | 4.28E+04 | 3.61E+04 | 5.70E+04 | 2.95E+04 | 3.16E+04 | 2.71E+04 |
| 3.91E+04 | 4.85E+04 | 4.48E+04 | 3.75E+04 | 2.10E+04 | 4.00E+04 | 5.70E+04 | 8.05E+04 | 7.07E+04 |
| 7.27E+04 | 9.15E+04 | 5.55E+04 | 1.10E+05 | 6.44E+04 | 7.13E+04 | 2.30E+04 | 4.15E+04 | 5.15E+04 |
| 9.00E+00 | 9.00E+00 | 9.00E+00 | 9.00E+00 | 1.94E+04 | 9.00E+00 | 9.42E+04 | 1.02E+05 | 7.93E+04 |
| 2.07E+04 | 2.51E+04 | 1.86E+04 | 2.10E+04 | 1.51E+04 | 2.42E+04 | 2.00E+04 | 1.70E+04 | 2.00E+04 |
| 1.63E+04 | 9.00E+00 | 3.09E+04 | 9.00E+00 | 9.00E+00 | 9.00E+00 | 8.55E+04 | 8.40E+04 | 8.14E+04 |
| 1.70E+04 | 1.47E+04 | 2.74E+04 | 2.81E+04 | 2.83E+04 | 1.78E+04 | 2.99E+04 | 2.72E+04 | 1.56E+04 |
| 8.57E+05 | 8.46E+05 | 8.06E+05 | 5.50E+05 | 1.02E+06 | 7.16E+05 | 1.02E+06 | 1.22E+06 | 1.15E+06 |
| 6.90E+04 | 9.36E+04 | 4.21E+04 | 1.12E+05 | 5.12E+04 | 5.70E+04 | 4.82E+04 | 4.40E+04 | 4.83E+04 |
| 7.62E+04 | 8.65E+04 | 6.11E+04 | 8.30E+04 | 7.06E+04 | 7.64E+04 | 2.61E+04 | 4.09E+04 | 3.99E+04 |
| 3.27E+04 | 2.82E+04 | 1.78E+04 | 4.25E+04 | 3.84E+04 | 2.06E+04 | 1.49E+04 | 1.85E+04 | 1.79E+04 |

|          |          |          |          |          |          |          |          |          |
|----------|----------|----------|----------|----------|----------|----------|----------|----------|
| 7.83E+04 | 6.31E+04 | 8.38E+04 | 1.18E+05 | 9.87E+04 | 3.53E+04 | 3.55E+04 | 3.52E+04 | 2.76E+04 |
| 2.20E+04 | 5.32E+04 | 4.12E+04 | 5.09E+04 | 4.71E+04 | 3.62E+04 | 2.20E+04 | 3.02E+04 | 1.94E+04 |
| 8.59E+04 | 8.44E+04 | 7.11E+04 | 1.11E+05 | 5.33E+04 | 5.57E+04 | 3.74E+04 | 4.24E+04 | 5.12E+04 |
| 3.12E+04 | 2.13E+04 | 4.06E+04 | 2.03E+04 | 1.99E+04 | 4.90E+04 | 1.28E+04 | 2.57E+04 | 1.78E+04 |
| 5.87E+04 | 7.01E+04 | 3.78E+04 | 8.00E+04 | 6.71E+04 | 5.91E+04 | 1.55E+04 | 2.71E+04 | 2.84E+04 |
| 2.11E+04 | 2.82E+04 | 3.43E+04 | 5.04E+04 | 2.56E+04 | 4.09E+04 | 1.18E+04 | 1.68E+04 | 1.73E+04 |
| 8.44E+04 | 1.22E+05 | 8.81E+04 | 1.58E+05 | 7.79E+04 | 7.00E+04 | 5.26E+04 | 5.17E+04 | 5.12E+04 |
| 2.83E+04 | 2.51E+04 | 3.58E+04 | 5.38E+04 | 5.45E+04 | 4.61E+04 | 2.61E+04 | 1.17E+04 | 3.63E+04 |
| 4.60E+04 | 5.17E+04 | 3.22E+04 | 6.25E+04 | 4.20E+04 | 3.96E+04 | 2.41E+04 | 1.84E+04 | 2.05E+04 |
| 1.10E+05 | 1.43E+05 | 6.51E+04 | 1.05E+05 | 7.26E+04 | 5.70E+04 | 4.61E+04 | 3.23E+04 | 2.97E+04 |
| 8.35E+04 | 6.52E+04 | 5.85E+04 | 5.65E+04 | 5.71E+04 | 9.26E+04 | 7.73E+04 | 7.45E+04 | 1.02E+05 |
| 3.48E+04 | 2.46E+04 | 2.39E+04 | 2.15E+04 | 3.03E+04 | 2.02E+04 | 4.61E+04 | 2.27E+04 | 4.98E+04 |
| 2.00E+06 | 2.21E+06 | 2.89E+06 | 2.37E+06 | 2.48E+06 | 2.74E+06 | 7.08E+06 | 5.10E+06 | 4.34E+06 |
| 6.31E+04 | 4.07E+04 | 2.81E+04 | 4.61E+04 | 5.22E+04 | 7.45E+04 | 1.83E+05 | 1.75E+05 | 1.17E+05 |
| 8.95E+03 | 1.93E+04 | 1.99E+04 | 1.37E+04 | 7.64E+03 | 2.43E+04 | 2.03E+04 | 1.37E+04 | 1.37E+04 |
| 3.83E+03 | 9.00E+00 | 9.00E+00 | 9.00E+00 | 9.00E+00 | 9.00E+00 | 2.85E+04 | 2.99E+04 | 4.24E+04 |
| 2.61E+04 | 3.60E+04 | 2.02E+04 | 2.25E+04 | 3.90E+04 | 2.75E+04 | 2.95E+04 | 2.74E+04 | 2.01E+04 |
| 1.59E+04 | 1.57E+04 | 1.29E+04 | 9.69E+03 | 1.04E+04 | 3.17E+03 | 4.07E+04 | 2.80E+04 | 3.29E+04 |
| 9.00E+00 | 9.00E+00 | 1.30E+04 | 6.34E+03 | 9.00E+00 | 9.00E+00 | 6.89E+04 | 6.81E+04 | 6.34E+04 |
| 2.97E+04 | 1.30E+04 | 1.07E+04 | 2.09E+04 | 8.96E+03 | 9.42E+03 | 5.90E+04 | 4.92E+04 | 5.96E+04 |
| 2.18E+04 | 4.68E+04 | 2.16E+04 | 3.95E+04 | 3.39E+04 | 3.52E+04 | 2.95E+04 | 3.80E+04 | 4.11E+04 |
| 2.45E+04 | 2.46E+04 | 2.99E+04 | 2.69E+04 | 3.41E+04 | 3.63E+04 | 6.88E+04 | 6.70E+04 | 1.04E+05 |
| 9.00E+00 | 9.00E+00 | 2.11E+04 | 9.00E+00 | 9.00E+00 | 1.52E+04 | 5.80E+05 | 6.11E+05 | 5.10E+05 |
| 9.00E+00 | 9.00E+00 | 9.13E+02 | 9.02E+02 | 9.00E+00 | 9.00E+00 | 5.98E+04 | 8.75E+04 | 6.76E+04 |
| 1.20E+03 | 9.00E+00 | 9.00E+00 | 9.00E+00 | 1.94E+03 | 9.00E+00 | 6.00E+04 | 7.22E+04 | 7.32E+04 |
| 8.35E+04 | 5.77E+04 | 1.11E+05 | 6.94E+04 | 4.20E+04 | 1.24E+05 | 7.16E+05 | 7.39E+05 | 6.28E+05 |
| 1.82E+04 | 1.98E+04 | 1.53E+04 | 2.22E+04 | 1.96E+04 | 1.53E+04 | 1.61E+04 | 2.63E+04 | 2.39E+04 |
| 6.82E+04 | 5.20E+04 | 1.04E+05 | 7.94E+04 | 9.71E+04 | 1.23E+05 | 1.50E+05 | 1.98E+05 | 1.62E+05 |
| 2.81E+04 | 3.15E+04 | 1.34E+04 | 9.00E+00 | 9.00E+00 | 2.70E+04 | 7.94E+06 | 7.00E+06 | 7.01E+06 |
| 9.00E+00 | 9.00E+00 | 9.00E+00 | 9.00E+00 | 9.00E+00 | 9.00E+00 | 2.22E+07 | 2.41E+07 | 2.20E+07 |
| 9.00E+00 | 9.00E+00 | 9.00E+00 | 9.00E+00 | 9.00E+00 | 9.00E+00 | 1.65E+04 | 1.72E+04 | 2.05E+04 |
| 1.69E+05 | 1.41E+05 | 9.83E+04 | 1.76E+05 | 1.33E+05 | 1.14E+05 | 6.08E+04 | 5.08E+04 | 6.44E+04 |
| 5.96E+04 | 5.37E+04 | 4.17E+04 | 9.43E+04 | 3.86E+04 | 4.84E+04 | 7.62E+04 | 3.59E+04 | 8.30E+04 |
| 6.54E+04 | 3.12E+04 | 4.80E+04 | 6.49E+04 | 2.62E+04 | 4.62E+04 | 1.94E+04 | 2.47E+04 | 2.43E+04 |
| 1.07E+04 | 9.72E+03 | 5.12E+04 | 3.44E+03 | 9.00E+00 | 7.82E+03 | 8.71E+03 | 1.30E+04 | 1.84E+04 |
| 5.64E+04 | 3.22E+04 | 4.71E+04 | 3.90E+04 | 3.85E+04 | 4.15E+04 | 1.45E+04 | 1.67E+04 | 2.06E+04 |
| 9.00E+00 | 9.00E+00 | 9.00E+00 | 9.00E+00 | 9.00E+00 | 2.19E+04 | 5.38E+04 | 4.32E+04 | 5.07E+04 |
| 2.26E+04 | 2.06E+04 | 3.75E+04 | 1.41E+04 | 3.76E+04 | 3.51E+04 | 4.49E+05 | 7.67E+05 | 3.58E+05 |
| 9.00E+00 | 9.00E+00 | 9.00E+00 | 9.00E+00 | 9.00E+00 | 9.00E+00 | 3.53E+04 | 4.03E+04 | 4.33E+04 |
| 1.84E+05 | 1.18E+05 | 1.73E+05 | 1.50E+05 | 1.67E+05 | 1.67E+05 | 2.04E+05 | 2.05E+05 | 1.98E+05 |
| 1.70E+05 | 1.70E+05 | 2.02E+05 | 1.99E+05 | 1.59E+05 | 1.23E+05 | 1.63E+05 | 1.70E+05 | 1.71E+05 |
| 1.55E+05 | 1.58E+05 | 2.13E+05 | 1.70E+05 | 1.49E+05 | 7.17E+04 | 1.26E+05 | 1.58E+05 | 1.22E+05 |
| 4.14E+04 | 3.36E+04 | 4.47E+04 | 4.19E+04 | 3.22E+04 | 3.08E+04 | 3.19E+04 | 2.73E+04 | 1.66E+04 |
| 6.92E+03 | 2.15E+04 | 2.08E+04 | 9.69E+03 | 1.58E+04 | 2.15E+04 | 1.39E+04 | 2.46E+04 | 2.05E+04 |
| 4.49E+05 | 3.19E+05 | 1.91E+05 | 3.18E+05 | 2.81E+05 | 2.55E+05 | 1.54E+05 | 1.27E+05 | 1.35E+05 |
| 5.73E+04 | 5.66E+04 | 5.67E+04 | 7.71E+04 | 3.85E+04 | 5.51E+04 | 3.71E+04 | 2.45E+04 | 1.81E+04 |
| 1.16E+05 | 1.33E+05 | 6.91E+04 | 1.18E+05 | 7.38E+04 | 1.13E+05 | 3.62E+04 | 4.35E+04 | 3.17E+04 |
| 1.31E+06 | 1.51E+06 | 1.23E+06 | 1.39E+06 | 1.24E+06 | 1.41E+06 | 1.50E+06 | 1.88E+06 | 1.77E+06 |
| 2.50E+04 | 2.89E+04 | 2.43E+04 | 3.26E+04 | 3.50E+04 | 6.89E+04 | 4.10E+04 | 3.62E+04 | 4.24E+04 |
| 1.64E+04 | 1.77E+04 | 1.82E+04 | 1.25E+04 | 1.52E+04 | 2.69E+04 | 2.64E+04 | 1.71E+04 | 2.41E+04 |
| 9.39E+04 | 6.39E+04 | 5.72E+04 | 7.52E+04 | 6.17E+04 | 6.86E+04 | 2.16E+04 | 1.62E+04 | 2.13E+04 |
| 4.29E+04 | 3.59E+04 | 3.10E+04 | 6.24E+04 | 5.39E+04 | 4.35E+04 | 1.59E+04 | 2.64E+04 | 1.70E+04 |
| 3.78E+05 | 4.09E+05 | 3.82E+05 | 7.56E+05 | 4.52E+05 | 4.47E+05 | 1.31E+05 | 1.29E+05 | 1.26E+05 |
| 1.25E+05 | 1.32E+05 | 1.00E+05 | 1.84E+05 | 1.40E+05 | 8.71E+04 | 4.66E+04 | 2.09E+04 | 5.08E+04 |

|          |          |          |          |          |          |          |          |          |
|----------|----------|----------|----------|----------|----------|----------|----------|----------|
| 2.09E+05 | 1.97E+05 | 1.42E+05 | 2.18E+05 | 1.38E+05 | 1.23E+05 | 7.97E+04 | 7.78E+04 | 7.88E+04 |
| 1.17E+05 | 8.76E+04 | 1.20E+05 | 1.43E+05 | 1.02E+05 | 1.07E+05 | 6.08E+04 | 7.97E+04 | 8.14E+04 |
| 1.07E+05 | 1.18E+05 | 1.23E+05 | 9.02E+04 | 1.08E+05 | 1.22E+05 | 3.04E+05 | 2.19E+05 | 1.76E+05 |
| 7.04E+04 | 6.96E+04 | 3.26E+04 | 6.47E+04 | 3.09E+04 | 3.78E+04 | 2.83E+04 | 2.98E+04 | 2.27E+04 |
| 6.93E+04 | 9.77E+04 | 8.43E+04 | 7.26E+04 | 1.20E+05 | 7.19E+04 | 1.00E+05 | 8.24E+04 | 1.09E+05 |
| 1.81E+04 | 1.63E+04 | 1.59E+04 | 3.03E+04 | 1.57E+04 | 2.70E+04 | 2.14E+04 | 3.35E+04 | 1.86E+04 |
| 4.45E+04 | 3.82E+04 | 3.47E+04 | 4.44E+04 | 4.38E+04 | 4.49E+04 | 2.11E+04 | 2.20E+04 | 2.27E+04 |
| 3.93E+04 | 4.24E+04 | 4.16E+04 | 3.17E+04 | 4.26E+04 | 3.62E+04 | 1.90E+04 | 1.05E+04 | 9.25E+03 |
| 5.09E+04 | 4.15E+04 | 7.69E+04 | 4.10E+04 | 5.97E+04 | 6.38E+04 | 4.62E+04 | 2.27E+04 | 2.11E+04 |
| 3.47E+04 | 4.16E+04 | 1.81E+04 | 4.23E+04 | 3.80E+04 | 3.50E+04 | 5.49E+04 | 5.38E+04 | 4.96E+04 |
| 3.52E+05 | 3.28E+05 | 2.50E+05 | 3.13E+05 | 1.90E+05 | 3.47E+05 | 1.18E+05 | 2.23E+05 | 2.39E+05 |
| 1.28E+06 | 8.28E+05 | 1.30E+06 | 1.32E+06 | 1.52E+06 | 1.39E+06 | 2.97E+06 | 3.40E+06 | 3.18E+06 |
| 5.47E+05 | 4.88E+05 | 5.88E+05 | 6.72E+05 | 5.66E+05 | 5.56E+05 | 1.58E+06 | 1.35E+06 | 1.28E+06 |
| 4.74E+06 | 4.92E+06 | 6.38E+06 | 5.98E+06 | 5.03E+06 | 5.36E+06 | 2.80E+06 | 2.81E+06 | 2.76E+06 |
| 2.37E+07 | 2.07E+07 | 2.21E+07 | 3.10E+07 | 2.62E+07 | 2.32E+07 | 1.64E+07 | 1.79E+07 | 1.57E+07 |
| 1.21E+05 | 1.19E+05 | 1.08E+05 | 1.07E+05 | 8.07E+04 | 1.21E+05 | 1.06E+05 | 1.06E+05 | 1.25E+05 |
| 2.15E+05 | 1.47E+05 | 1.79E+05 | 2.19E+05 | 1.13E+05 | 1.58E+05 | 1.46E+05 | 1.41E+05 | 1.27E+05 |
| 1.98E+05 | 2.44E+05 | 2.52E+05 | 2.63E+05 | 2.48E+05 | 2.60E+05 | 2.45E+05 | 3.23E+05 | 2.66E+05 |
| 5.12E+04 | 3.55E+04 | 4.04E+04 | 6.97E+04 | 3.38E+04 | 2.75E+04 | 3.80E+04 | 4.38E+04 | 4.15E+04 |
| 6.05E+05 | 5.04E+05 | 4.16E+05 | 4.96E+05 | 3.03E+05 | 5.69E+05 | 3.54E+05 | 3.01E+05 | 3.05E+05 |
| 4.04E+05 | 3.10E+05 | 3.06E+05 | 3.17E+05 | 3.30E+05 | 5.68E+05 | 1.42E+05 | 1.29E+05 | 1.28E+05 |
| 5.96E+04 | 3.60E+04 | 5.04E+04 | 3.59E+04 | 4.79E+04 | 4.93E+04 | 5.77E+04 | 6.58E+04 | 3.91E+04 |
| 2.36E+04 | 3.51E+04 | 2.09E+04 | 3.80E+04 | 2.81E+04 | 3.52E+04 | 3.12E+04 | 4.22E+04 | 2.71E+04 |
| 1.01E+05 | 9.99E+04 | 9.95E+04 | 1.10E+05 | 9.68E+04 | 1.65E+05 | 3.73E+04 | 3.71E+04 | 3.29E+04 |
| 6.30E+04 | 6.99E+04 | 5.91E+04 | 7.85E+04 | 4.53E+04 | 8.25E+04 | 5.10E+04 | 4.49E+04 | 4.19E+04 |
| 1.26E+05 | 1.61E+05 | 1.20E+05 | 1.46E+05 | 1.12E+05 | 1.98E+05 | 8.36E+04 | 7.60E+04 | 7.87E+04 |
| 4.40E+06 | 7.70E+06 | 7.21E+06 | 5.98E+06 | 4.54E+06 | 4.40E+06 | 8.35E+06 | 8.76E+06 | 8.61E+06 |
| 1.79E+06 | 1.38E+06 | 1.01E+06 | 1.63E+06 | 7.87E+05 | 1.37E+06 | 9.82E+05 | 8.67E+05 | 8.06E+05 |
| 3.20E+04 | 7.79E+04 | 4.80E+04 | 6.70E+04 | 2.77E+04 | 6.94E+04 | 4.86E+04 | 3.57E+04 | 3.46E+04 |
| 4.96E+06 | 6.04E+06 | 5.30E+06 | 4.58E+06 | 5.85E+06 | 4.89E+06 | 6.83E+06 | 6.61E+06 | 5.85E+06 |
| 2.15E+07 | 1.67E+07 | 1.32E+07 | 1.64E+07 | 1.06E+07 | 1.92E+07 | 8.79E+06 | 9.38E+06 | 8.08E+06 |
| 2.50E+07 | 2.42E+07 | 1.92E+07 | 2.64E+07 | 2.48E+07 | 3.72E+07 | 8.43E+06 | 8.13E+06 | 7.86E+06 |
| 7.86E+05 | 5.85E+05 | 4.09E+05 | 7.51E+05 | 5.18E+05 | 8.39E+05 | 2.56E+05 | 2.77E+05 | 2.61E+05 |
| 3.16E+04 | 2.95E+04 | 3.44E+04 | 3.71E+04 | 2.48E+04 | 5.22E+04 | 3.34E+04 | 2.60E+04 | 2.04E+04 |
| 3.11E+04 | 4.63E+04 | 3.76E+04 | 7.00E+04 | 2.60E+04 | 3.75E+04 | 6.28E+04 | 7.05E+04 | 9.81E+04 |
| 1.22E+05 | 1.03E+05 | 1.07E+05 | 1.13E+05 | 1.02E+05 | 1.46E+05 | 2.21E+05 | 2.49E+05 | 2.10E+05 |
| 2.21E+05 | 1.72E+05 | 1.75E+05 | 1.97E+05 | 1.48E+05 | 2.44E+05 | 1.46E+05 | 1.36E+05 | 1.22E+05 |
| 8.47E+05 | 8.04E+05 | 7.23E+05 | 1.06E+06 | 5.95E+05 | 9.09E+05 | 4.65E+05 | 5.14E+05 | 5.14E+05 |
| 8.83E+06 | 7.55E+06 | 8.57E+06 | 8.52E+06 | 6.28E+06 | 7.62E+06 | 6.24E+06 | 7.14E+06 | 6.63E+06 |
| 6.55E+05 | 5.73E+05 | 3.94E+05 | 7.46E+05 | 3.64E+05 | 5.59E+05 | 2.07E+05 | 2.11E+05 | 2.15E+05 |
| 5.26E+05 | 3.88E+05 | 3.33E+05 | 5.06E+05 | 3.32E+05 | 4.43E+05 | 2.60E+05 | 2.54E+05 | 2.31E+05 |
| 1.36E+07 | 1.15E+07 | 1.27E+07 | 1.46E+07 | 1.14E+07 | 1.41E+07 | 7.15E+06 | 8.01E+06 | 7.68E+06 |
| 9.00E+00 | 9.00E+00 | 9.00E+00 | 9.00E+00 | 9.00E+00 | 9.00E+00 | 1.19E+04 | 7.25E+03 | 1.09E+04 |
| 4.64E+05 | 2.75E+05 | 2.36E+05 | 3.40E+05 | 1.83E+05 | 3.35E+05 | 8.43E+04 | 8.64E+04 | 1.06E+05 |
| 1.61E+05 | 1.51E+05 | 8.85E+04 | 2.15E+05 | 6.98E+04 | 2.03E+05 | 1.51E+05 | 1.41E+05 | 1.56E+05 |
| 4.57E+06 | 3.82E+06 | 2.42E+06 | 3.41E+06 | 2.18E+06 | 4.05E+06 | 2.02E+06 | 2.01E+06 | 1.72E+06 |
| 1.86E+06 | 1.74E+06 | 1.28E+06 | 2.08E+06 | 1.35E+06 | 2.57E+06 | 3.87E+05 | 6.09E+05 | 5.16E+05 |
| 2.79E+05 | 2.51E+05 | 1.75E+05 | 2.96E+05 | 2.12E+05 | 2.87E+05 | 1.58E+05 | 1.07E+05 | 1.10E+05 |
| 1.61E+05 | 2.02E+05 | 1.11E+05 | 1.87E+05 | 1.57E+05 | 2.61E+05 | 6.34E+04 | 5.15E+04 | 5.13E+04 |
| 1.26E+05 | 1.08E+05 | 1.11E+05 | 1.51E+05 | 1.28E+05 | 1.89E+05 | 6.10E+04 | 3.70E+04 | 6.98E+04 |
| 5.95E+05 | 3.82E+05 | 3.94E+05 | 6.00E+05 | 3.92E+05 | 5.57E+05 | 1.66E+05 | 1.45E+05 | 1.66E+05 |
| 1.14E+06 | 1.11E+06 | 1.15E+06 | 1.49E+06 | 1.07E+06 | 1.43E+06 | 6.50E+05 | 7.14E+05 | 7.01E+05 |
| 1.70E+06 | 1.37E+06 | 9.83E+05 | 2.05E+06 | 1.99E+06 | 2.26E+06 | 7.60E+05 | 7.82E+05 | 7.65E+05 |
| 6.36E+04 | 8.39E+04 | 5.28E+04 | 6.88E+04 | 8.35E+04 | 1.45E+05 | 4.11E+04 | 5.28E+04 | 6.62E+04 |

|          |          |          |          |          |          |          |          |          |
|----------|----------|----------|----------|----------|----------|----------|----------|----------|
| 1.85E+05 | 1.34E+05 | 1.59E+05 | 1.38E+05 | 1.34E+05 | 2.44E+05 | 1.23E+05 | 1.36E+05 | 1.40E+05 |
| 1.85E+05 | 1.73E+05 | 1.46E+05 | 1.28E+05 | 1.22E+05 | 3.23E+05 | 1.48E+05 | 1.39E+05 | 1.21E+05 |
| 2.62E+05 | 2.46E+05 | 1.74E+05 | 2.10E+05 | 1.98E+05 | 3.15E+05 | 1.25E+05 | 1.03E+05 | 1.40E+05 |
| 5.56E+04 | 3.97E+04 | 5.91E+04 | 5.91E+04 | 3.10E+04 | 6.55E+04 | 1.69E+04 | 1.74E+04 | 2.30E+04 |
| 3.13E+06 | 4.35E+06 | 2.85E+06 | 3.53E+06 | 3.86E+06 | 4.54E+06 | 4.66E+06 | 6.23E+06 | 5.85E+06 |
| 3.10E+06 | 2.37E+06 | 2.16E+06 | 1.97E+06 | 2.20E+06 | 3.21E+06 | 3.56E+06 | 3.52E+06 | 2.82E+06 |
| 4.73E+06 | 3.71E+06 | 4.43E+06 | 3.92E+06 | 4.63E+06 | 6.69E+06 | 3.41E+06 | 3.10E+06 | 3.09E+06 |
| 2.54E+04 | 2.09E+04 | 1.95E+04 | 3.35E+04 | 1.25E+04 | 3.09E+04 | 3.35E+05 | 3.40E+05 | 4.39E+05 |
| 6.96E+04 | 9.52E+04 | 8.57E+04 | 3.96E+04 | 6.56E+04 | 8.23E+04 | 7.72E+04 | 1.06E+05 | 9.40E+04 |
| 4.99E+05 | 4.50E+05 | 4.29E+05 | 4.41E+05 | 4.53E+05 | 6.15E+05 | 3.43E+05 | 3.24E+05 | 2.98E+05 |
| 9.65E+06 | 6.14E+06 | 8.36E+06 | 7.64E+06 | 6.75E+06 | 1.26E+07 | 1.14E+07 | 1.12E+07 | 1.13E+07 |
| 3.02E+05 | 2.03E+05 | 1.81E+05 | 2.65E+05 | 1.67E+05 | 2.03E+05 | 1.41E+05 | 1.55E+05 | 1.71E+05 |
| 6.13E+04 | 5.28E+04 | 8.42E+04 | 5.72E+04 | 6.89E+04 | 1.01E+05 | 4.52E+05 | 4.74E+05 | 4.26E+05 |
| 1.37E+05 | 3.15E+04 | 8.58E+04 | 1.16E+05 | 8.73E+04 | 1.06E+05 | 7.94E+04 | 7.20E+04 | 6.46E+04 |
| 3.08E+06 | 2.32E+06 | 2.41E+06 | 2.56E+06 | 2.02E+06 | 2.53E+06 | 3.48E+06 | 3.49E+06 | 3.44E+06 |
| 4.13E+07 | 3.12E+07 | 2.80E+07 | 3.55E+07 | 2.06E+07 | 4.79E+07 | 1.55E+07 | 1.49E+07 | 1.54E+07 |
| 2.65E+07 | 2.67E+07 | 1.98E+07 | 2.80E+07 | 2.37E+07 | 3.97E+07 | 8.65E+06 | 1.01E+07 | 9.94E+06 |
| 6.96E+04 | 4.22E+04 | 5.48E+04 | 4.47E+04 | 5.72E+04 | 9.19E+04 | 9.46E+04 | 6.68E+04 | 8.08E+04 |
| 8.89E+05 | 7.30E+05 | 6.80E+05 | 8.10E+05 | 6.62E+05 | 1.22E+06 | 4.50E+05 | 6.41E+05 | 5.55E+05 |
| 3.73E+05 | 3.17E+05 | 3.20E+05 | 3.72E+05 | 2.86E+05 | 5.11E+05 | 2.07E+05 | 1.98E+05 | 1.92E+05 |
| 6.47E+05 | 6.07E+05 | 5.47E+05 | 6.73E+05 | 5.78E+05 | 1.10E+06 | 3.24E+05 | 3.50E+05 | 3.40E+05 |
| 5.67E+06 | 5.06E+06 | 5.21E+06 | 5.71E+06 | 4.88E+06 | 8.05E+06 | 4.93E+06 | 4.95E+06 | 4.54E+06 |
| 7.31E+05 | 6.84E+05 | 3.67E+05 | 7.22E+05 | 6.03E+05 | 1.04E+06 | 2.57E+05 | 2.86E+05 | 2.58E+05 |
| 2.36E+04 | 1.91E+04 | 1.52E+04 | 1.52E+04 | 1.34E+04 | 1.39E+04 | 8.16E+04 | 7.68E+04 | 8.59E+04 |
| 3.66E+05 | 2.94E+05 | 2.61E+05 | 3.08E+05 | 3.17E+05 | 4.44E+05 | 1.98E+05 | 1.91E+05 | 2.00E+05 |
| 1.57E+07 | 1.58E+07 | 1.20E+07 | 1.64E+07 | 2.55E+07 | 2.86E+07 | 8.73E+06 | 8.81E+06 | 9.17E+06 |
| 1.33E+04 | 9.00E+00 | 9.00E+00 | 9.00E+00 | 6.95E+03 | 9.00E+00 | 7.83E+04 | 5.53E+04 | 5.10E+04 |
| 1.82E+04 | 2.65E+04 | 1.33E+04 | 1.06E+04 | 1.75E+04 | 2.16E+04 | 8.12E+04 | 6.65E+04 | 6.20E+04 |
| 8.05E+06 | 8.57E+06 | 7.29E+06 | 9.50E+06 | 8.67E+06 | 1.55E+07 | 4.75E+06 | 4.98E+06 | 5.01E+06 |
| 1.51E+06 | 1.64E+06 | 1.02E+06 | 1.56E+06 | 1.84E+06 | 2.53E+06 | 9.04E+05 | 7.10E+05 | 7.73E+05 |
| 4.78E+04 | 4.20E+04 | 1.47E+04 | 3.74E+04 | 4.98E+04 | 4.14E+04 | 2.56E+04 | 1.18E+04 | 1.86E+04 |
| 4.57E+05 | 3.94E+05 | 4.13E+05 | 4.70E+05 | 4.00E+05 | 8.49E+05 | 1.46E+05 | 3.04E+05 | 2.90E+05 |
| 3.01E+05 | 2.66E+05 | 2.65E+05 | 3.39E+05 | 3.14E+05 | 2.90E+05 | 1.87E+05 | 2.36E+05 | 2.03E+05 |
| 6.19E+05 | 5.88E+05 | 6.14E+05 | 7.84E+05 | 8.65E+05 | 1.31E+06 | 2.88E+05 | 2.99E+05 | 2.79E+05 |
| 2.13E+06 | 2.11E+06 | 1.94E+06 | 2.06E+06 | 3.28E+06 | 4.77E+06 | 9.70E+05 | 9.10E+05 | 8.41E+05 |
| 1.44E+05 | 1.15E+05 | 7.34E+04 | 1.26E+05 | 1.63E+05 | 2.10E+05 | 9.62E+04 | 9.90E+04 | 1.12E+05 |
| 1.90E+05 | 1.94E+05 | 1.32E+05 | 1.86E+05 | 2.53E+05 | 3.37E+05 | 1.24E+05 | 1.15E+05 | 1.17E+05 |
| 1.88E+05 | 2.25E+05 | 1.22E+05 | 1.97E+05 | 2.97E+05 | 4.06E+05 | 6.98E+04 | 4.11E+04 | 8.44E+04 |
| 1.13E+07 | 1.09E+07 | 7.60E+06 | 1.10E+07 | 2.46E+07 | 2.37E+07 | 7.32E+06 | 7.79E+06 | 6.76E+06 |
| 1.01E+05 | 9.33E+04 | 8.96E+04 | 1.09E+05 | 1.30E+05 | 2.22E+05 | 3.62E+04 | 5.39E+04 | 4.33E+04 |
| 3.67E+04 | 2.64E+04 | 2.77E+04 | 3.69E+04 | 3.30E+04 | 5.88E+04 | 2.41E+04 | 1.86E+04 | 1.77E+04 |
| 1.33E+04 | 9.00E+00 | 1.85E+04 | 2.18E+04 | 4.56E+04 | 6.05E+04 | 1.33E+04 | 9.80E+03 | 1.26E+04 |
| 3.14E+04 | 5.28E+04 | 4.04E+04 | 5.77E+04 | 3.02E+04 | 4.49E+04 | 2.97E+04 | 5.77E+04 | 3.56E+04 |
| 4.41E+04 | 3.16E+04 | 2.28E+04 | 3.35E+04 | 3.25E+04 | 5.75E+04 | 3.41E+04 | 2.64E+04 | 3.63E+04 |
| 1.01E+05 | 8.98E+04 | 8.71E+04 | 8.79E+04 | 8.34E+04 | 1.81E+05 | 7.51E+04 | 6.73E+04 | 5.90E+04 |
| 4.09E+04 | 2.15E+04 | 3.03E+04 | 3.95E+04 | 4.91E+04 | 5.14E+04 | 6.35E+04 | 5.17E+04 | 5.48E+04 |
| 8.68E+04 | 5.25E+04 | 6.61E+04 | 9.83E+04 | 8.58E+04 | 1.04E+05 | 3.54E+04 | 5.47E+04 | 6.62E+04 |
| 6.91E+05 | 5.36E+05 | 5.57E+05 | 6.50E+05 | 1.00E+06 | 1.14E+06 | 5.75E+05 | 5.76E+05 | 5.33E+05 |
| 5.70E+04 | 1.08E+05 | 7.06E+04 | 1.07E+05 | 5.39E+04 | 1.70E+05 | 4.01E+05 | 4.05E+05 | 4.16E+05 |
| 9.00E+00 | 9.00E+00 | 9.00E+00 | 9.00E+00 | 9.00E+00 | 9.00E+00 | 1.19E+04 | 2.37E+04 | 1.02E+04 |
| 8.74E+03 | 1.38E+04 | 2.93E+03 | 1.04E+04 | 1.07E+04 | 1.42E+04 | 8.98E+04 | 6.93E+04 | 7.88E+04 |
| 3.06E+03 | 2.04E+03 | 2.49E+03 | 5.11E+02 | 9.00E+00 | 9.00E+00 | 4.19E+04 | 2.74E+04 | 3.72E+04 |
| 5.60E+03 | 4.89E+03 | 5.87E+03 | 7.89E+03 | 8.55E+03 | 7.74E+03 | 6.53E+04 | 6.12E+04 | 4.75E+04 |
| 2.55E+04 | 4.26E+04 | 4.77E+04 | 3.14E+04 | 3.11E+04 | 3.31E+04 | 2.34E+04 | 3.65E+04 | 4.39E+04 |



|          |          |          |          |          |          |          |          |          |
|----------|----------|----------|----------|----------|----------|----------|----------|----------|
| 2.56E+04 | 3.60E+04 | 3.48E+04 | 2.33E+04 | 1.79E+04 | 3.44E+04 | 1.31E+04 | 7.35E+03 | 1.03E+04 |
| 9.00E+00 | 9.00E+00 | 9.00E+00 | 9.00E+00 | 9.00E+00 | 9.00E+00 | 4.97E+04 | 4.80E+04 | 1.69E+04 |
| 2.90E+04 | 8.89E+04 | 5.47E+04 | 7.23E+04 | 7.77E+04 | 8.07E+04 | 4.80E+04 | 6.21E+04 | 5.93E+04 |
| 1.35E+04 | 1.22E+04 | 2.61E+04 | 8.07E+03 | 4.25E+03 | 2.29E+04 | 2.73E+04 | 3.11E+04 | 3.33E+04 |
| 4.05E+03 | 9.81E+03 | 1.63E+04 | 1.63E+04 | 1.91E+04 | 2.13E+04 | 4.12E+04 | 2.95E+04 | 1.96E+04 |
| 9.29E+02 | 9.00E+00 | 2.25E+03 | 9.00E+00 | 9.00E+00 | 9.00E+00 | 2.35E+04 | 2.72E+04 | 3.55E+04 |
| 5.15E+06 | 5.59E+06 | 4.43E+06 | 5.26E+06 | 4.90E+06 | 5.52E+06 | 6.33E+06 | 7.16E+06 | 6.49E+06 |
| 5.38E+04 | 3.19E+04 | 4.24E+04 | 4.29E+04 | 4.31E+04 | 4.33E+04 | 7.26E+04 | 5.45E+04 | 5.06E+04 |
| 2.77E+06 | 2.58E+06 | 1.98E+06 | 2.07E+06 | 2.05E+06 | 1.99E+06 | 2.56E+06 | 2.58E+06 | 2.53E+06 |
| 2.29E+06 | 2.12E+06 | 3.10E+06 | 2.07E+06 | 2.30E+06 | 2.82E+06 | 1.78E+06 | 2.24E+06 | 2.14E+06 |
| 7.93E+05 | 7.46E+05 | 8.48E+05 | 7.69E+05 | 6.61E+05 | 8.56E+05 | 6.86E+05 | 6.52E+05 | 6.70E+05 |
| 8.80E+05 | 9.08E+05 | 9.62E+05 | 8.43E+05 | 8.98E+05 | 1.01E+06 | 5.84E+05 | 8.73E+05 | 8.53E+05 |
| 8.88E+06 | 8.08E+06 | 9.30E+06 | 9.84E+06 | 7.83E+06 | 1.32E+07 | 6.75E+06 | 5.83E+06 | 6.86E+06 |
| 2.03E+06 | 1.51E+06 | 1.69E+06 | 1.65E+06 | 1.33E+06 | 1.88E+06 | 8.23E+05 | 8.96E+05 | 8.63E+05 |
| 8.96E+05 | 7.58E+05 | 7.38E+05 | 7.46E+05 | 9.33E+05 | 1.05E+06 | 6.86E+05 | 7.37E+05 | 6.83E+05 |
| 1.28E+06 | 1.08E+06 | 1.09E+06 | 1.00E+06 | 8.82E+05 | 1.46E+06 | 6.28E+05 | 7.05E+05 | 6.20E+05 |
| 7.84E+06 | 6.70E+06 | 7.81E+06 | 6.76E+06 | 7.17E+06 | 8.55E+06 | 1.03E+07 | 1.01E+07 | 8.40E+06 |
| 5.02E+07 | 3.87E+07 | 4.42E+07 | 4.32E+07 | 3.46E+07 | 6.39E+07 | 2.55E+07 | 2.50E+07 | 2.18E+07 |
| 3.25E+07 | 2.67E+07 | 2.92E+07 | 3.19E+07 | 3.38E+07 | 4.59E+07 | 1.51E+07 | 1.60E+07 | 1.54E+07 |
| 9.96E+05 | 8.26E+05 | 8.64E+05 | 8.95E+05 | 1.00E+06 | 1.34E+06 | 4.84E+05 | 4.87E+05 | 4.53E+05 |
| 1.72E+06 | 1.27E+06 | 1.70E+06 | 1.39E+06 | 1.42E+06 | 1.96E+06 | 2.17E+06 | 1.98E+06 | 2.05E+06 |
| 6.28E+05 | 5.77E+05 | 5.61E+05 | 5.12E+05 | 5.06E+05 | 7.62E+05 | 4.90E+05 | 4.60E+05 | 4.43E+05 |
| 2.72E+06 | 2.83E+06 | 2.61E+06 | 2.58E+06 | 2.66E+06 | 2.66E+06 | 2.39E+06 | 2.37E+06 | 2.65E+06 |
| 1.33E+06 | 1.09E+06 | 1.50E+06 | 1.07E+06 | 1.02E+06 | 2.12E+06 | 1.40E+06 | 1.42E+06 | 1.40E+06 |
| 1.36E+06 | 1.15E+06 | 1.46E+06 | 1.35E+06 | 1.15E+06 | 1.93E+06 | 1.07E+06 | 8.75E+05 | 9.06E+05 |
| 1.39E+06 | 1.03E+06 | 9.02E+05 | 1.01E+06 | 7.46E+05 | 9.60E+05 | 5.61E+05 | 5.20E+05 | 4.61E+05 |
| 4.53E+07 | 3.62E+07 | 4.10E+07 | 3.72E+07 | 4.29E+07 | 5.88E+07 | 3.16E+07 | 3.29E+07 | 3.15E+07 |
| 3.10E+06 | 2.15E+06 | 1.51E+06 | 1.95E+06 | 2.18E+06 | 2.58E+06 | 1.06E+06 | 1.05E+06 | 1.06E+06 |
| 2.75E+05 | 9.00E+00 | 9.00E+00 | 9.00E+00 | 9.00E+00 | 2.69E+05 | 3.96E+05 | 2.91E+05 | 4.43E+05 |
| 3.29E+05 | 3.16E+05 | 3.26E+05 | 3.39E+05 | 4.06E+05 | 4.01E+05 | 4.91E+05 | 4.50E+05 | 3.83E+05 |
| 1.77E+05 | 1.49E+05 | 1.68E+05 | 1.52E+05 | 1.55E+05 | 1.99E+05 | 1.74E+05 | 1.96E+05 | 2.06E+05 |
| 2.25E+06 | 1.71E+06 | 2.19E+06 | 2.07E+06 | 2.33E+06 | 3.14E+06 | 3.62E+06 | 3.91E+06 | 3.92E+06 |
| 4.58E+06 | 3.41E+06 | 3.30E+06 | 3.89E+06 | 4.89E+06 | 5.42E+06 | 2.02E+06 | 1.94E+06 | 1.86E+06 |
| 1.98E+07 | 1.45E+07 | 1.63E+07 | 1.64E+07 | 2.31E+07 | 2.70E+07 | 1.08E+07 | 1.11E+07 | 1.14E+07 |
| 2.82E+05 | 3.04E+05 | 4.66E+05 | 3.64E+05 | 3.96E+05 | 5.34E+05 | 5.69E+05 | 5.37E+05 | 6.29E+05 |
| 2.03E+06 | 1.66E+06 | 1.91E+06 | 1.79E+06 | 2.22E+06 | 3.59E+06 | 1.26E+06 | 1.18E+06 | 1.22E+06 |
| 2.77E+06 | 2.44E+06 | 2.70E+06 | 2.57E+06 | 3.12E+06 | 4.47E+06 | 1.49E+06 | 1.65E+06 | 1.57E+06 |
| 7.19E+05 | 6.46E+05 | 7.41E+05 | 7.52E+05 | 7.12E+05 | 7.30E+05 | 5.02E+05 | 5.27E+05 | 5.02E+05 |
| 2.48E+05 | 2.37E+05 | 3.68E+05 | 2.36E+05 | 2.83E+05 | 4.21E+05 | 1.30E+05 | 2.03E+05 | 1.67E+05 |
| 2.59E+05 | 2.75E+05 | 3.13E+05 | 2.80E+05 | 2.47E+05 | 3.63E+05 | 2.04E+05 | 2.00E+05 | 2.11E+05 |
| 1.05E+05 | 1.03E+05 | 1.09E+05 | 1.06E+05 | 9.31E+04 | 9.58E+04 | 1.39E+05 | 1.42E+05 | 1.36E+05 |
| 5.39E+04 | 8.24E+04 | 6.78E+04 | 1.18E+05 | 1.23E+05 | 7.36E+04 | 1.51E+05 | 1.92E+05 | 1.61E+05 |
| 2.45E+04 | 8.88E+03 | 1.95E+04 | 3.08E+04 | 2.96E+04 | 2.16E+04 | 1.64E+05 | 1.18E+05 | 1.34E+05 |
| 4.42E+04 | 5.36E+04 | 4.01E+04 | 8.07E+04 | 5.81E+04 | 3.66E+04 | 4.01E+04 | 5.96E+04 | 5.72E+04 |
| 6.42E+04 | 7.28E+04 | 6.64E+04 | 1.04E+05 | 8.57E+04 | 7.01E+04 | 1.44E+05 | 1.41E+05 | 1.34E+05 |
| 5.09E+04 | 6.50E+04 | 7.83E+04 | 1.08E+05 | 8.63E+04 | 5.07E+04 | 1.09E+05 | 1.00E+05 | 6.30E+04 |
| 9.25E+04 | 7.85E+04 | 8.75E+04 | 1.25E+05 | 8.04E+04 | 9.26E+04 | 1.74E+05 | 1.31E+05 | 1.45E+05 |
| 9.00E+00 | 9.00E+00 | 9.00E+00 | 9.00E+00 | 9.00E+00 | 9.00E+00 | 9.79E+04 | 9.10E+04 | 9.24E+04 |
| 1.23E+04 | 9.29E+03 | 1.13E+04 | 1.88E+04 | 1.42E+04 | 2.53E+04 | 1.59E+04 | 1.96E+04 | 2.29E+04 |
| 2.87E+04 | 3.16E+04 | 3.23E+04 | 2.88E+04 | 3.56E+04 | 3.48E+04 | 1.90E+04 | 3.07E+04 | 3.16E+04 |
| 6.97E+03 | 1.07E+03 | 1.20E+04 | 1.15E+04 | 7.87E+03 | 7.87E+03 | 3.08E+04 | 2.31E+04 | 2.66E+04 |
| 9.00E+00 | 8.43E+02 | 9.00E+00 | 9.00E+00 | 9.00E+00 | 1.32E+03 | 2.34E+04 | 2.12E+04 | 1.57E+04 |
| 2.98E+05 | 3.66E+05 | 4.22E+05 | 2.75E+05 | 4.19E+05 | 4.06E+05 | 8.69E+05 | 1.06E+06 | 9.36E+05 |
| 3.69E+04 | 4.07E+04 | 3.88E+04 | 4.33E+04 | 4.27E+04 | 3.19E+04 | 5.10E+04 | 6.25E+04 | 5.59E+04 |

|          |          |          |          |          |          |          |          |          |
|----------|----------|----------|----------|----------|----------|----------|----------|----------|
| 8.22E+03 | 3.05E+04 | 3.01E+04 | 1.50E+04 | 1.76E+04 | 1.49E+04 | 8.45E+04 | 9.20E+04 | 6.51E+04 |
| 1.91E+05 | 1.73E+05 | 3.40E+05 | 1.34E+05 | 3.20E+05 | 1.98E+05 | 6.32E+06 | 6.18E+06 | 5.38E+06 |
| 1.10E+04 | 2.39E+04 | 1.80E+04 | 9.72E+03 | 1.72E+04 | 2.10E+04 | 4.52E+06 | 4.08E+06 | 4.24E+06 |
| 2.39E+05 | 1.97E+05 | 2.56E+05 | 2.12E+05 | 1.97E+05 | 1.93E+05 | 2.26E+06 | 2.31E+06 | 2.11E+06 |
| 1.79E+04 | 3.89E+04 | 1.43E+04 | 3.07E+04 | 4.08E+04 | 2.85E+04 | 1.17E+07 | 1.23E+07 | 1.14E+07 |
| 9.00E+00 | 9.00E+00 | 9.00E+00 | 9.00E+00 | 9.00E+00 | 9.00E+00 | 1.30E+04 | 1.17E+04 | 1.44E+04 |
| 6.72E+05 | 6.96E+05 | 1.08E+06 | 8.53E+05 | 8.10E+05 | 6.10E+05 | 5.16E+06 | 5.44E+06 | 5.29E+06 |
| 6.40E+04 | 1.82E+05 | 8.96E+04 | 5.69E+04 | 1.19E+05 | 8.21E+04 | 5.27E+07 | 5.07E+07 | 4.51E+07 |
| 8.50E+03 | 1.35E+04 | 1.97E+04 | 1.21E+04 | 8.80E+03 | 1.60E+04 | 2.15E+04 | 2.04E+04 | 2.13E+04 |
| 6.18E+05 | 4.78E+05 | 7.77E+05 | 6.46E+05 | 5.91E+05 | 5.37E+05 | 3.49E+06 | 3.63E+06 | 3.47E+06 |
| 5.40E+04 | 3.55E+04 | 6.37E+04 | 6.63E+04 | 4.86E+04 | 6.41E+04 | 8.25E+04 | 8.44E+04 | 7.34E+04 |
| 5.95E+05 | 6.52E+05 | 7.08E+05 | 6.42E+05 | 7.00E+05 | 5.74E+05 | 1.18E+07 | 9.50E+06 | 7.67E+06 |
| 3.70E+04 | 1.45E+05 | 7.90E+04 | 5.61E+04 | 1.37E+05 | 8.73E+04 | 3.18E+07 | 2.41E+07 | 2.01E+07 |
| 2.44E+04 | 5.70E+04 | 6.59E+04 | 3.95E+04 | 7.66E+04 | 2.02E+04 | 5.28E+05 | 4.22E+05 | 4.31E+05 |
| 1.31E+05 | 7.89E+04 | 9.48E+04 | 1.36E+05 | 1.33E+05 | 1.58E+05 | 1.03E+05 | 9.42E+04 | 9.45E+04 |
| 3.70E+03 | 2.74E+03 | 1.82E+03 | 9.43E+03 | 9.96E+03 | 2.28E+03 | 5.33E+04 | 8.67E+04 | 5.71E+04 |
| 2.68E+03 | 6.37E+03 | 4.69E+03 | 9.95E+03 | 3.31E+03 | 8.05E+03 | 1.15E+04 | 8.43E+03 | 6.04E+03 |
| 3.26E+03 | 2.80E+03 | 1.62E+03 | 4.86E+03 | 7.29E+03 | 3.64E+03 | 5.24E+05 | 5.32E+05 | 6.28E+05 |
| 9.00E+00 | 9.00E+00 | 9.00E+00 | 9.00E+00 | 1.99E+03 | 9.00E+00 | 3.08E+05 | 3.76E+05 | 3.23E+05 |
| 1.70E+04 | 1.63E+04 | 1.27E+04 | 1.17E+04 | 1.93E+04 | 7.20E+03 | 6.92E+05 | 6.67E+05 | 6.05E+05 |
| 2.28E+04 | 2.86E+04 | 1.61E+04 | 2.23E+04 | 2.51E+04 | 2.36E+04 | 7.53E+05 | 7.71E+05 | 7.81E+05 |
| 9.00E+00 | 1.46E+03 | 9.00E+00 | 9.00E+00 | 9.00E+00 | 9.00E+00 | 1.87E+06 | 1.66E+06 | 1.54E+06 |
| 5.79E+03 | 7.13E+03 | 6.19E+03 | 9.00E+00 | 1.28E+04 | 8.94E+03 | 1.67E+04 | 8.89E+03 | 2.40E+04 |
| 1.21E+04 | 4.91E+03 | 1.02E+04 | 6.27E+03 | 1.65E+04 | 1.42E+04 | 1.59E+04 | 2.14E+04 | 1.64E+04 |
| 5.93E+04 | 6.17E+04 | 4.10E+04 | 4.82E+04 | 4.59E+04 | 6.48E+04 | 6.92E+04 | 5.89E+04 | 7.42E+04 |
| 5.96E+03 | 8.79E+03 | 7.75E+03 | 8.71E+03 | 7.35E+03 | 1.03E+04 | 7.84E+03 | 6.63E+03 | 8.40E+03 |
| 2.09E+04 | 1.53E+04 | 1.30E+04 | 1.13E+04 | 1.14E+04 | 2.85E+04 | 2.30E+04 | 3.97E+04 | 3.63E+04 |
| 5.38E+05 | 6.18E+05 | 4.67E+05 | 4.34E+05 | 5.73E+05 | 7.90E+05 | 7.26E+05 | 7.11E+05 | 6.18E+05 |
| 1.15E+04 | 8.20E+03 | 1.12E+04 | 1.12E+04 | 1.01E+04 | 2.05E+04 | 1.45E+04 | 1.07E+04 | 1.20E+04 |
| 9.00E+00 | 9.00E+00 | 9.00E+00 | 1.87E+03 | 9.00E+00 | 9.00E+00 | 1.48E+05 | 1.56E+05 | 1.34E+05 |
| 5.43E+04 | 4.54E+04 | 4.16E+04 | 5.59E+04 | 4.06E+04 | 3.83E+04 | 1.27E+04 | 3.64E+04 | 2.33E+04 |
| 5.37E+05 | 4.21E+05 | 2.33E+05 | 6.79E+05 | 2.78E+05 | 2.65E+05 | 1.11E+05 | 1.06E+05 | 7.91E+04 |
| 9.69E+04 | 8.06E+04 | 7.48E+04 | 1.17E+05 | 7.71E+04 | 6.43E+04 | 2.89E+04 | 3.27E+04 | 2.94E+04 |
| 2.30E+04 | 1.99E+04 | 2.78E+04 | 2.10E+04 | 4.55E+04 | 4.06E+04 | 6.36E+04 | 5.23E+04 | 4.83E+04 |
| 3.27E+04 | 3.30E+04 | 2.48E+04 | 1.94E+04 | 3.26E+04 | 3.16E+04 | 6.35E+04 | 5.86E+04 | 6.19E+04 |
| 8.52E+05 | 9.57E+05 | 8.08E+05 | 6.25E+05 | 9.64E+05 | 1.07E+06 | 1.09E+06 | 1.08E+06 | 1.23E+06 |
| 2.22E+04 | 2.49E+04 | 2.82E+04 | 1.70E+04 | 1.33E+04 | 2.29E+04 | 2.31E+04 | 2.67E+04 | 2.66E+04 |
| 5.26E+03 | 1.34E+04 | 1.01E+04 | 1.05E+04 | 5.95E+03 | 1.14E+04 | 7.93E+05 | 8.75E+05 | 7.99E+05 |
| 9.00E+00 | 9.00E+00 | 9.00E+00 | 9.00E+00 | 9.00E+00 | 9.00E+00 | 1.21E+05 | 1.06E+05 | 9.77E+04 |
| 4.92E+04 | 7.28E+04 | 3.74E+04 | 3.70E+04 | 8.41E+04 | 5.47E+04 | 4.97E+04 | 5.63E+04 | 7.34E+04 |
| 3.02E+04 | 4.35E+04 | 4.11E+04 | 1.99E+04 | 4.44E+04 | 5.20E+04 | 6.76E+04 | 4.84E+04 | 5.40E+04 |
| 1.00E+05 | 1.10E+05 | 1.10E+05 | 6.18E+04 | 9.51E+04 | 9.55E+04 | 6.71E+04 | 4.53E+04 | 5.57E+04 |
| 1.12E+05 | 1.18E+05 | 1.53E+05 | 7.94E+04 | 9.41E+04 | 1.13E+05 | 8.06E+04 | 8.82E+04 | 6.18E+04 |
| 2.74E+04 | 3.19E+04 | 4.52E+04 | 3.22E+04 | 5.85E+04 | 3.56E+04 | 2.23E+04 | 1.81E+04 | 1.99E+04 |
| 9.00E+00 | 9.00E+00 | 9.00E+00 | 9.00E+00 | 9.00E+00 | 9.00E+00 | 2.45E+04 | 2.13E+04 | 2.45E+04 |
| 7.57E+04 | 9.62E+04 | 6.63E+04 | 5.87E+04 | 2.37E+04 | 7.37E+04 | 2.23E+05 | 2.87E+05 | 2.11E+05 |
| 5.62E+06 | 4.71E+06 | 5.35E+06 | 6.78E+06 | 3.35E+06 | 3.93E+06 | 1.14E+07 | 1.13E+07 | 9.32E+06 |
| 6.02E+05 | 4.95E+05 | 8.32E+04 | 1.80E+05 | 7.46E+04 | 2.97E+05 | 4.70E+05 | 4.31E+05 | 4.26E+05 |
| 2.60E+05 | 6.25E+04 | 2.38E+05 | 2.51E+05 | 2.06E+05 | 1.90E+05 | 7.04E+05 | 7.71E+05 | 8.52E+05 |
| 5.03E+06 | 4.45E+06 | 5.81E+06 | 5.61E+06 | 3.99E+06 | 4.77E+06 | 5.62E+06 | 5.22E+06 | 4.82E+06 |
| 2.08E+06 | 2.54E+06 | 4.08E+06 | 3.28E+06 | 3.78E+06 | 2.98E+06 | 3.74E+06 | 3.71E+06 | 4.06E+06 |
| 1.23E+06 | 1.23E+06 | 1.84E+06 | 1.61E+06 | 1.53E+06 | 1.39E+06 | 1.40E+06 | 1.58E+06 | 1.41E+06 |
| 9.00E+00 | 9.52E+03 | 9.00E+00 | 9.00E+00 | 9.00E+00 | 9.00E+00 | 1.55E+05 | 1.70E+05 | 1.69E+05 |
| 3.98E+04 | 4.07E+04 | 3.55E+04 | 4.22E+04 | 4.60E+04 | 2.46E+04 | 2.58E+04 | 2.93E+04 | 2.93E+04 |

|          |          |          |          |          |          |          |          |          |
|----------|----------|----------|----------|----------|----------|----------|----------|----------|
| 9.78E+05 | 7.55E+05 | 9.43E+05 | 1.02E+06 | 8.62E+05 | 6.56E+05 | 7.23E+05 | 8.43E+05 | 7.36E+05 |
| 3.89E+04 | 3.94E+04 | 4.05E+04 | 3.20E+04 | 5.27E+04 | 2.78E+04 | 3.89E+04 | 3.59E+04 | 3.44E+04 |
| 5.98E+04 | 8.09E+04 | 1.18E+05 | 1.17E+05 | 1.26E+05 | 4.32E+04 | 9.14E+04 | 8.51E+04 | 9.26E+04 |
| 1.41E+05 | 2.76E+05 | 3.31E+05 | 3.43E+05 | 3.77E+05 | 3.60E+05 | 3.08E+05 | 2.74E+05 | 2.87E+05 |
| 1.36E+05 | 1.66E+05 | 2.10E+05 | 1.92E+05 | 1.71E+05 | 1.79E+05 | 1.65E+05 | 1.62E+05 | 1.90E+05 |
| 2.58E+04 | 1.59E+04 | 3.01E+04 | 3.09E+04 | 9.00E+00 | 2.26E+04 | 6.24E+04 | 5.39E+04 | 8.42E+04 |
| 1.04E+05 | 8.20E+04 | 1.12E+05 | 8.27E+04 | 1.10E+05 | 9.00E+04 | 2.07E+05 | 2.14E+05 | 2.22E+05 |
| 5.26E+04 | 3.53E+04 | 6.68E+04 | 2.43E+04 | 9.21E+04 | 6.96E+04 | 1.22E+05 | 1.36E+05 | 1.26E+05 |
| 6.68E+04 | 5.88E+04 | 5.57E+04 | 6.60E+04 | 6.34E+04 | 7.22E+04 | 4.06E+04 | 3.91E+04 | 3.95E+04 |
| 8.11E+03 | 5.90E+03 | 1.29E+04 | 3.65E+03 | 1.16E+04 | 1.27E+04 | 5.59E+03 | 1.16E+04 | 1.12E+04 |
| 1.17E+04 | 1.26E+04 | 1.68E+04 | 1.50E+04 | 2.12E+04 | 1.60E+04 | 9.36E+03 | 9.61E+03 | 8.71E+03 |
| 1.86E+04 | 1.70E+04 | 2.04E+04 | 2.17E+04 | 2.25E+04 | 2.22E+04 | 2.10E+04 | 2.02E+04 | 1.80E+04 |
| 2.14E+04 | 1.72E+04 | 2.39E+04 | 2.04E+04 | 2.33E+04 | 2.50E+04 | 2.14E+04 | 2.01E+04 | 2.11E+04 |
| 5.24E+04 | 4.03E+04 | 2.83E+04 | 4.75E+04 | 3.61E+04 | 5.05E+04 | 2.40E+04 | 2.50E+04 | 2.37E+04 |
| 3.00E+05 | 2.29E+05 | 2.96E+05 | 2.62E+05 | 2.82E+05 | 3.45E+05 | 3.50E+05 | 3.40E+05 | 3.46E+05 |
| 1.35E+06 | 1.34E+06 | 1.59E+06 | 1.57E+06 | 1.71E+06 | 1.71E+06 | 3.48E+06 | 3.12E+06 | 2.70E+06 |
| 3.17E+07 | 2.35E+07 | 2.47E+07 | 2.55E+07 | 2.86E+07 | 3.84E+07 | 1.74E+07 | 1.65E+07 | 1.64E+07 |
| 3.08E+05 | 2.25E+05 | 2.81E+05 | 2.49E+05 | 3.11E+05 | 3.28E+05 | 2.27E+05 | 2.02E+05 | 1.77E+05 |
| 5.38E+06 | 4.77E+06 | 4.89E+06 | 5.14E+06 | 4.98E+06 | 5.92E+06 | 4.36E+06 | 3.96E+06 | 3.81E+06 |
| 1.14E+07 | 1.09E+07 | 1.00E+07 | 1.14E+07 | 1.51E+07 | 1.50E+07 | 8.08E+06 | 7.33E+06 | 7.08E+06 |
| 2.02E+06 | 1.58E+06 | 1.52E+06 | 1.55E+06 | 1.31E+06 | 2.29E+06 | 1.13E+06 | 1.19E+06 | 1.08E+06 |
| 3.20E+05 | 2.49E+05 | 2.50E+05 | 2.75E+05 | 2.31E+05 | 2.80E+05 | 2.68E+05 | 2.52E+05 | 2.39E+05 |
| 2.43E+06 | 2.26E+06 | 2.08E+06 | 2.31E+06 | 2.24E+06 | 2.88E+06 | 2.77E+06 | 2.93E+06 | 2.80E+06 |
| 1.37E+07 | 1.48E+07 | 1.11E+07 | 1.40E+07 | 1.39E+07 | 1.40E+07 | 8.12E+06 | 8.35E+06 | 8.29E+06 |
| 6.05E+04 | 6.40E+04 | 6.04E+04 | 7.30E+04 | 6.15E+04 | 8.82E+04 | 1.35E+05 | 1.16E+05 | 1.22E+05 |
| 4.77E+06 | 4.47E+06 | 4.24E+06 | 4.04E+06 | 4.72E+06 | 4.65E+06 | 5.76E+06 | 6.10E+06 | 5.93E+06 |
| 2.56E+07 | 2.42E+07 | 2.22E+07 | 2.43E+07 | 3.01E+07 | 3.01E+07 | 1.52E+07 | 1.54E+07 | 1.49E+07 |
| 7.44E+06 | 6.16E+06 | 6.66E+06 | 7.99E+06 | 5.60E+06 | 8.64E+06 | 3.56E+06 | 3.43E+06 | 3.42E+06 |
| 6.93E+06 | 5.79E+06 | 6.26E+06 | 7.10E+06 | 6.12E+06 | 8.01E+06 | 4.12E+06 | 4.11E+06 | 4.14E+06 |
| 9.53E+06 | 8.44E+06 | 8.44E+06 | 9.76E+06 | 9.93E+06 | 1.02E+07 | 6.23E+06 | 5.60E+06 | 5.46E+06 |
| 3.79E+07 | 3.06E+07 | 3.88E+07 | 4.31E+07 | 3.45E+07 | 5.13E+07 | 1.99E+07 | 1.96E+07 | 2.07E+07 |
| 2.16E+05 | 1.81E+05 | 2.00E+05 | 1.44E+05 | 3.99E+05 | 6.83E+05 | 2.17E+05 | 1.25E+05 | 1.27E+05 |
| 4.26E+04 | 3.45E+04 | 3.90E+04 | 3.32E+04 | 3.36E+04 | 5.77E+04 | 1.85E+04 | 2.00E+04 | 1.86E+04 |
| 3.19E+07 | 2.41E+07 | 2.62E+07 | 2.62E+07 | 2.83E+07 | 3.93E+07 | 1.86E+07 | 1.79E+07 | 1.72E+07 |
| 7.29E+06 | 5.60E+06 | 7.01E+06 | 6.01E+06 | 5.23E+06 | 1.04E+07 | 3.42E+06 | 3.36E+06 | 3.41E+06 |
| 5.96E+06 | 5.00E+06 | 5.15E+06 | 5.18E+06 | 6.22E+06 | 6.57E+06 | 3.76E+06 | 3.36E+06 | 3.38E+06 |
| 1.43E+06 | 1.70E+06 | 2.02E+06 | 2.29E+06 | 2.02E+06 | 2.61E+06 | 1.44E+06 | 1.55E+06 | 1.15E+06 |
| 1.09E+07 | 1.05E+07 | 9.78E+06 | 1.07E+07 | 1.44E+07 | 1.47E+07 | 8.09E+06 | 7.17E+06 | 7.07E+06 |
| 2.55E+07 | 2.20E+07 | 2.28E+07 | 2.53E+07 | 2.99E+07 | 3.07E+07 | 1.17E+07 | 1.17E+07 | 1.14E+07 |
| 7.81E+05 | 5.61E+05 | 4.79E+05 | 8.13E+05 | 5.66E+05 | 7.23E+05 | 2.24E+05 | 2.29E+05 | 2.15E+05 |
| 9.62E+06 | 7.40E+06 | 7.02E+06 | 8.11E+06 | 6.65E+06 | 1.12E+07 | 5.00E+06 | 5.15E+06 | 4.81E+06 |
| 2.83E+06 | 2.24E+06 | 2.32E+06 | 1.97E+06 | 1.40E+06 | 3.84E+06 | 1.49E+06 | 1.42E+06 | 1.37E+06 |
| 1.55E+06 | 1.35E+06 | 1.20E+06 | 1.51E+06 | 1.19E+06 | 1.75E+06 | 8.39E+05 | 8.01E+05 | 7.92E+05 |
| 9.48E+06 | 8.14E+06 | 7.94E+06 | 8.54E+06 | 6.80E+06 | 1.31E+07 | 6.90E+06 | 7.00E+06 | 6.81E+06 |
| 5.56E+06 | 5.14E+06 | 5.20E+06 | 5.64E+06 | 5.01E+06 | 9.29E+06 | 4.93E+06 | 4.67E+06 | 4.71E+06 |
| 1.43E+08 | 1.58E+08 | 1.20E+08 | 1.44E+08 | 1.65E+08 | 1.74E+08 | 7.81E+07 | 7.87E+07 | 7.34E+07 |
| 9.72E+06 | 8.90E+06 | 9.10E+06 | 8.36E+06 | 1.21E+07 | 1.24E+07 | 7.39E+06 | 6.83E+06 | 6.52E+06 |
| 8.09E+07 | 7.37E+07 | 4.64E+07 | 6.43E+07 | 7.42E+07 | 6.13E+07 | 3.00E+07 | 3.09E+07 | 3.12E+07 |
| 1.83E+05 | 1.40E+05 | 1.92E+05 | 2.37E+05 | 1.46E+05 | 1.45E+05 | 1.43E+05 | 1.36E+05 | 1.25E+05 |
| 1.51E+05 | 1.34E+05 | 1.35E+05 | 1.34E+05 | 1.31E+05 | 1.87E+05 | 1.57E+05 | 1.57E+05 | 1.47E+05 |
| 7.78E+04 | 7.27E+04 | 7.16E+04 | 8.00E+04 | 9.04E+04 | 1.69E+05 | 1.20E+05 | 1.20E+05 | 7.88E+04 |
| 5.64E+05 | 5.01E+05 | 5.60E+05 | 5.30E+05 | 5.87E+05 | 8.01E+05 | 8.49E+05 | 9.22E+05 | 8.45E+05 |
| 1.08E+07 | 9.63E+06 | 7.66E+06 | 9.20E+06 | 1.05E+07 | 8.49E+06 | 5.06E+06 | 4.97E+06 | 4.65E+06 |
| 1.75E+08 | 1.68E+08 | 1.65E+08 | 1.66E+08 | 2.01E+08 | 2.01E+08 | 1.22E+08 | 1.15E+08 | 1.10E+08 |

|          |          |          |          |          |          |          |          |          |
|----------|----------|----------|----------|----------|----------|----------|----------|----------|
| 1.39E+05 | 1.73E+05 | 2.42E+05 | 2.99E+05 | 2.08E+05 | 1.69E+05 | 8.45E+04 | 1.28E+05 | 1.70E+05 |
| 1.21E+05 | 8.68E+04 | 8.88E+04 | 1.08E+05 | 9.91E+04 | 8.82E+04 | 9.49E+04 | 1.01E+05 | 9.32E+04 |
| 2.36E+04 | 2.01E+04 | 1.87E+04 | 2.10E+04 | 2.13E+04 | 2.42E+04 | 2.61E+04 | 2.16E+04 | 1.93E+04 |
| 1.33E+04 | 1.05E+04 | 1.33E+04 | 1.01E+04 | 1.67E+04 | 2.56E+04 | 2.15E+04 | 2.78E+04 | 2.78E+04 |
| 2.41E+05 | 2.30E+05 | 1.87E+05 | 2.61E+05 | 2.12E+05 | 2.25E+05 | 1.24E+05 | 1.21E+05 | 1.18E+05 |
| 4.45E+04 | 4.19E+04 | 3.97E+04 | 5.13E+04 | 4.49E+04 | 5.51E+04 | 2.23E+04 | 2.17E+04 | 2.22E+04 |
| 8.90E+06 | 8.53E+06 | 9.37E+06 | 1.01E+07 | 1.05E+07 | 1.12E+07 | 8.73E+06 | 7.95E+06 | 8.05E+06 |
| 5.89E+05 | 4.73E+05 | 4.68E+05 | 5.29E+05 | 5.37E+05 | 8.27E+05 | 7.75E+05 | 7.62E+05 | 7.43E+05 |
| 5.46E+06 | 4.70E+06 | 5.65E+06 | 4.93E+06 | 5.43E+06 | 6.50E+06 | 3.18E+06 | 3.02E+06 | 2.79E+06 |
| 7.08E+06 | 7.01E+06 | 7.40E+06 | 7.36E+06 | 7.62E+06 | 9.14E+06 | 6.33E+06 | 6.46E+06 | 6.21E+06 |
| 4.90E+05 | 4.89E+05 | 4.99E+05 | 5.11E+05 | 5.61E+05 | 7.28E+05 | 4.59E+05 | 4.48E+05 | 4.32E+05 |
| 1.03E+06 | 7.82E+05 | 1.03E+06 | 9.40E+05 | 8.98E+05 | 1.15E+06 | 3.86E+05 | 3.86E+05 | 3.79E+05 |
| 3.43E+05 | 3.03E+05 | 3.62E+05 | 3.34E+05 | 3.39E+05 | 4.35E+05 | 1.66E+05 | 1.59E+05 | 1.50E+05 |
| 1.16E+05 | 1.04E+05 | 1.14E+05 | 1.24E+05 | 1.49E+05 | 1.50E+05 | 1.25E+05 | 1.21E+05 | 1.13E+05 |
| 2.39E+04 | 2.69E+04 | 2.04E+04 | 2.87E+04 | 2.88E+04 | 3.53E+04 | 2.29E+04 | 2.38E+04 | 2.62E+04 |
| 1.22E+05 | 1.18E+05 | 1.27E+05 | 1.47E+05 | 1.38E+05 | 1.19E+05 | 7.22E+04 | 6.10E+04 | 5.83E+04 |
| 1.70E+04 | 1.64E+04 | 1.49E+04 | 1.17E+04 | 1.69E+04 | 2.60E+04 | 1.50E+04 | 1.43E+04 | 1.29E+04 |
| 3.41E+04 | 3.11E+04 | 3.77E+04 | 3.29E+04 | 4.08E+04 | 3.82E+04 | 2.50E+04 | 2.56E+04 | 2.58E+04 |
| 4.83E+04 | 3.72E+04 | 2.44E+04 | 2.15E+04 | 2.58E+04 | 2.91E+04 | 2.77E+04 | 2.84E+04 | 2.91E+04 |
| 5.33E+04 | 4.66E+04 | 5.17E+04 | 4.00E+04 | 6.85E+04 | 5.39E+04 | 3.27E+04 | 2.98E+04 | 3.07E+04 |
| 4.26E+05 | 2.90E+05 | 3.18E+05 | 3.74E+05 | 2.87E+05 | 4.76E+05 | 7.62E+05 | 7.14E+05 | 6.99E+05 |
| 5.74E+07 | 5.32E+07 | 3.81E+07 | 5.14E+07 | 6.21E+07 | 6.85E+07 | 3.74E+07 | 3.65E+07 | 3.64E+07 |
| 2.15E+06 | 1.63E+06 | 3.56E+06 | 1.76E+06 | 2.83E+06 | 4.70E+06 | 6.86E+06 | 6.94E+06 | 6.59E+06 |
| 8.57E+06 | 9.00E+06 | 7.16E+06 | 8.79E+06 | 1.03E+07 | 1.03E+07 | 8.13E+06 | 7.99E+06 | 7.61E+06 |
| 2.28E+05 | 2.04E+05 | 1.76E+05 | 2.06E+05 | 1.75E+05 | 2.58E+05 | 1.40E+06 | 1.50E+06 | 1.38E+06 |
| 2.18E+05 | 2.17E+05 | 1.88E+05 | 2.29E+05 | 2.04E+05 | 2.75E+05 | 3.09E+05 | 3.11E+05 | 2.91E+05 |
| 3.02E+06 | 3.19E+06 | 2.48E+06 | 3.03E+06 | 3.36E+06 | 3.63E+06 | 2.36E+06 | 2.35E+06 | 2.17E+06 |
| 2.98E+06 | 2.62E+06 | 1.97E+06 | 2.56E+06 | 2.86E+06 | 2.23E+06 | 2.08E+06 | 2.14E+06 | 2.05E+06 |
| 3.94E+07 | 3.32E+07 | 2.19E+07 | 3.14E+07 | 2.83E+07 | 3.77E+07 | 2.26E+07 | 2.24E+07 | 2.04E+07 |
| 1.00E+06 | 7.94E+05 | 7.89E+05 | 8.32E+05 | 8.06E+05 | 9.64E+05 | 6.49E+05 | 4.99E+05 | 6.49E+05 |
| 1.64E+06 | 1.32E+06 | 9.50E+05 | 1.20E+06 | 1.23E+06 | 1.93E+06 | 9.28E+05 | 9.40E+05 | 8.93E+05 |
| 2.54E+05 | 2.17E+05 | 1.80E+05 | 1.72E+05 | 1.13E+05 | 2.41E+05 | 1.26E+05 | 1.31E+05 | 1.22E+05 |
| 5.99E+07 | 5.07E+07 | 3.59E+07 | 5.01E+07 | 5.79E+07 | 6.43E+07 | 3.60E+07 | 3.47E+07 | 3.47E+07 |
| 2.53E+07 | 2.30E+07 | 2.28E+07 | 2.19E+07 | 2.02E+07 | 3.19E+07 | 1.63E+07 | 1.72E+07 | 1.63E+07 |
| 2.08E+06 | 1.69E+06 | 1.53E+06 | 1.80E+06 | 1.74E+06 | 2.66E+06 | 1.49E+06 | 1.33E+06 | 1.30E+06 |
| 1.42E+05 | 1.48E+05 | 1.27E+05 | 1.36E+05 | 1.79E+05 | 2.23E+05 | 1.11E+05 | 1.16E+05 | 1.06E+05 |
| 2.65E+04 | 2.38E+04 | 1.59E+04 | 2.30E+04 | 1.99E+04 | 3.53E+04 | 1.88E+04 | 1.50E+04 | 1.34E+04 |
| 7.72E+04 | 7.13E+04 | 4.51E+04 | 8.53E+04 | 6.89E+04 | 1.05E+05 | 5.80E+04 | 5.08E+04 | 5.63E+04 |
| 1.18E+06 | 1.01E+06 | 9.49E+05 | 9.70E+05 | 8.56E+05 | 1.77E+06 | 7.65E+05 | 8.02E+05 | 7.02E+05 |
| 2.34E+05 | 2.14E+05 | 2.01E+05 | 2.07E+05 | 2.00E+05 | 3.93E+05 | 3.56E+05 | 3.57E+05 | 3.39E+05 |
| 3.21E+06 | 3.31E+06 | 2.54E+06 | 3.29E+06 | 3.63E+06 | 3.75E+06 | 2.56E+06 | 2.45E+06 | 2.28E+06 |
| 1.77E+07 | 1.91E+07 | 1.54E+07 | 1.73E+07 | 2.22E+07 | 2.06E+07 | 1.92E+07 | 1.92E+07 | 1.86E+07 |
| 1.48E+06 | 1.29E+06 | 8.85E+05 | 1.31E+06 | 1.63E+06 | 1.13E+06 | 9.14E+05 | 9.20E+05 | 9.04E+05 |
| 1.60E+04 | 1.70E+04 | 1.25E+04 | 1.39E+04 | 1.54E+04 | 2.15E+04 | 3.01E+04 | 4.17E+04 | 4.57E+04 |
| 4.97E+03 | 1.67E+04 | 1.17E+04 | 1.08E+04 | 1.15E+04 | 1.18E+04 | 6.82E+04 | 6.78E+04 | 6.17E+04 |
| 3.60E+04 | 4.53E+04 | 4.86E+04 | 4.48E+04 | 4.93E+04 | 5.23E+04 | 3.89E+05 | 3.81E+05 | 3.55E+05 |
| 7.70E+05 | 7.72E+05 | 7.60E+05 | 7.61E+05 | 9.11E+05 | 8.62E+05 | 6.75E+06 | 6.63E+06 | 6.33E+06 |
| 8.67E+05 | 8.17E+05 | 6.94E+05 | 9.05E+05 | 8.86E+05 | 7.72E+05 | 9.64E+05 | 9.62E+05 | 1.01E+06 |
| 4.86E+07 | 4.54E+07 | 3.77E+07 | 4.74E+07 | 5.18E+07 | 5.31E+07 | 5.71E+07 | 5.88E+07 | 5.71E+07 |
| 6.10E+05 | 4.36E+05 | 4.23E+05 | 3.26E+05 | 4.18E+05 | 9.49E+05 | 9.80E+05 | 1.03E+06 | 9.83E+05 |
| 2.38E+04 | 1.57E+04 | 1.14E+04 | 9.27E+03 | 1.58E+04 | 2.96E+04 | 3.00E+04 | 2.69E+04 | 2.44E+04 |
| 4.03E+05 | 3.47E+05 | 3.24E+05 | 2.79E+05 | 3.46E+05 | 6.63E+05 | 7.66E+05 | 7.78E+05 | 7.54E+05 |
| 1.57E+05 | 9.69E+04 | 1.06E+05 | 7.27E+04 | 9.85E+04 | 2.12E+05 | 6.61E+05 | 6.56E+05 | 6.69E+05 |
| 9.36E+04 | 4.95E+04 | 6.49E+04 | 5.71E+04 | 5.79E+04 | 1.16E+05 | 4.94E+04 | 4.59E+04 | 5.43E+04 |

|          |          |          |          |          |          |          |          |          |
|----------|----------|----------|----------|----------|----------|----------|----------|----------|
| 4.73E+05 | 3.90E+05 | 2.76E+05 | 4.35E+05 | 3.21E+05 | 4.83E+05 | 2.24E+05 | 2.25E+05 | 2.18E+05 |
| 4.35E+03 | 4.18E+03 | 1.91E+04 | 5.37E+03 | 1.93E+03 | 2.90E+03 | 1.87E+04 | 9.06E+03 | 1.75E+04 |
| 1.95E+05 | 1.18E+05 | 1.34E+05 | 1.43E+05 | 1.62E+05 | 2.16E+05 | 9.81E+04 | 9.94E+04 | 9.72E+04 |
| 2.06E+05 | 1.38E+05 | 1.29E+05 | 1.67E+05 | 1.26E+05 | 3.11E+05 | 1.20E+05 | 1.33E+05 | 1.32E+05 |
| 8.27E+05 | 6.21E+05 | 4.25E+05 | 8.20E+05 | 9.33E+05 | 1.35E+06 | 4.07E+05 | 3.42E+05 | 3.40E+05 |
| 8.25E+03 | 4.87E+03 | 3.93E+03 | 6.74E+03 | 4.20E+03 | 6.63E+03 | 3.36E+03 | 4.00E+03 | 4.92E+03 |
| 1.31E+04 | 1.28E+04 | 1.11E+04 | 1.84E+04 | 1.64E+04 | 1.58E+04 | 1.50E+04 | 1.52E+04 | 1.43E+04 |
| 9.89E+03 | 1.63E+04 | 9.40E+03 | 1.14E+04 | 2.11E+04 | 2.38E+04 | 1.35E+04 | 1.04E+04 | 1.55E+04 |
| 2.42E+04 | 2.06E+04 | 2.54E+04 | 2.87E+04 | 2.81E+04 | 2.90E+04 | 6.86E+04 | 6.46E+04 | 6.29E+04 |
| 9.81E+03 | 8.80E+03 | 1.56E+04 | 1.44E+04 | 1.20E+04 | 7.83E+03 | 2.24E+04 | 2.37E+04 | 2.33E+04 |
| 8.26E+03 | 6.72E+03 | 5.03E+03 | 7.08E+03 | 7.31E+03 | 5.23E+03 | 3.66E+03 | 3.81E+03 | 3.97E+03 |
| 2.18E+05 | 1.71E+05 | 1.13E+05 | 1.48E+05 | 1.57E+05 | 1.49E+05 | 1.50E+05 | 1.44E+05 | 1.38E+05 |
| 4.32E+04 | 2.97E+04 | 2.56E+04 | 2.94E+04 | 3.41E+04 | 3.56E+04 | 2.81E+04 | 2.62E+04 | 2.77E+04 |
| 2.43E+06 | 1.82E+06 | 1.80E+06 | 2.00E+06 | 2.46E+06 | 2.29E+06 | 1.74E+06 | 1.63E+06 | 1.99E+06 |
| 6.56E+04 | 6.37E+04 | 6.93E+04 | 7.15E+04 | 5.46E+04 | 5.44E+04 | 8.69E+04 | 8.06E+04 | 7.44E+04 |
| 2.00E+04 | 1.57E+04 | 1.22E+04 | 2.03E+04 | 1.90E+04 | 1.60E+04 | 1.32E+04 | 1.57E+04 | 1.22E+04 |
| 5.72E+04 | 3.26E+04 | 2.75E+04 | 4.50E+04 | 3.40E+04 | 6.54E+04 | 2.98E+04 | 3.00E+04 | 2.95E+04 |
| 1.84E+03 | 2.35E+03 | 2.58E+03 | 2.08E+03 | 1.99E+03 | 2.32E+03 | 2.72E+03 | 2.30E+03 | 2.85E+03 |
| 2.89E+04 | 4.79E+04 | 2.33E+04 | 3.53E+04 | 5.28E+04 | 5.05E+04 | 3.13E+04 | 2.95E+04 | 2.35E+04 |
| 1.84E+05 | 1.56E+05 | 1.23E+05 | 1.51E+05 | 1.64E+05 | 1.66E+05 | 1.56E+05 | 1.77E+05 | 1.65E+05 |
| 1.89E+05 | 1.14E+05 | 1.12E+05 | 1.15E+05 | 1.21E+05 | 1.31E+05 | 1.23E+05 | 1.24E+05 | 1.22E+05 |
| 2.57E+03 | 2.72E+03 | 4.64E+03 | 2.11E+03 | 2.87E+03 | 2.72E+03 | 1.96E+04 | 1.60E+04 | 2.47E+04 |
| 6.27E+03 | 4.68E+03 | 5.24E+03 | 2.55E+03 | 3.98E+03 | 5.19E+03 | 5.57E+03 | 4.04E+03 | 3.13E+03 |
| 8.19E+03 | 6.99E+03 | 5.56E+03 | 7.28E+03 | 5.06E+03 | 3.79E+03 | 6.64E+03 | 5.62E+03 | 7.83E+03 |
| 8.93E+04 | 9.02E+04 | 1.09E+05 | 6.55E+04 | 7.88E+04 | 1.08E+05 | 7.78E+04 | 8.01E+04 | 7.84E+04 |
| 4.16E+03 | 3.00E+03 | 3.83E+03 | 3.16E+03 | 3.75E+03 | 4.24E+03 | 3.73E+03 | 2.81E+03 | 3.12E+03 |
| 4.31E+03 | 3.85E+03 | 3.27E+03 | 9.19E+03 | 9.00E+00 | 3.96E+03 | 1.47E+04 | 1.69E+04 | 1.78E+04 |
| 1.15E+05 | 1.01E+05 | 1.03E+05 | 1.17E+05 | 8.12E+04 | 9.36E+04 | 3.04E+05 | 3.26E+05 | 3.03E+05 |
| 4.41E+05 | 5.13E+05 | 4.21E+05 | 4.64E+05 | 4.73E+05 | 5.93E+05 | 6.84E+05 | 7.15E+05 | 6.52E+05 |
| 3.95E+05 | 4.75E+05 | 3.93E+05 | 4.10E+05 | 4.30E+05 | 5.11E+05 | 5.88E+05 | 6.26E+05 | 5.35E+05 |
| 2.95E+04 | 3.17E+04 | 1.79E+04 | 3.64E+04 | 2.83E+04 | 4.54E+04 | 3.39E+04 | 3.24E+04 | 3.25E+04 |
| 1.46E+04 | 1.86E+04 | 9.48E+03 | 1.49E+04 | 2.25E+04 | 3.68E+04 | 3.21E+04 | 3.43E+04 | 3.23E+04 |
| 2.89E+03 | 2.43E+03 | 2.71E+03 | 2.45E+03 | 4.78E+03 | 6.49E+03 | 7.58E+03 | 8.89E+03 | 9.25E+03 |
| 9.00E+00 | 9.00E+00 | 9.00E+00 | 9.00E+00 | 9.00E+00 | 9.00E+00 | 1.12E+05 | 1.02E+05 | 1.02E+05 |
| 9.00E+00 | 9.00E+00 | 9.00E+00 | 9.00E+00 | 9.00E+00 | 9.00E+00 | 5.81E+04 | 5.36E+04 | 6.04E+04 |
| 4.19E+04 | 4.48E+04 | 4.18E+04 | 3.88E+04 | 4.16E+04 | 2.94E+04 | 3.84E+04 | 2.43E+04 | 4.10E+04 |
| 9.00E+00 | 9.00E+00 | 9.00E+00 | 9.00E+00 | 6.81E+03 | 5.48E+03 | 1.43E+06 | 1.14E+06 | 1.19E+06 |
| 9.00E+00 | 9.00E+00 | 9.00E+00 | 9.00E+00 | 9.00E+00 | 9.00E+00 | 1.80E+05 | 1.79E+05 | 1.39E+05 |
| 3.98E+04 | 4.14E+04 | 2.89E+04 | 4.18E+04 | 4.82E+04 | 3.82E+04 | 4.52E+04 | 4.06E+04 | 4.38E+04 |
| 3.69E+03 | 9.00E+00 | 9.00E+00 | 9.00E+00 | 9.00E+00 | 9.00E+00 | 5.89E+05 | 1.00E+06 | 6.71E+05 |
| 9.00E+00 | 9.00E+00 | 9.00E+00 | 9.00E+00 | 9.00E+00 | 9.00E+00 | 8.67E+04 | 7.15E+04 | 1.03E+05 |
| 3.62E+04 | 2.23E+04 | 3.43E+04 | 3.14E+04 | 2.99E+04 | 2.58E+04 | 4.44E+04 | 5.47E+04 | 3.55E+04 |
| 9.00E+00 | 9.00E+00 | 9.00E+00 | 9.00E+00 | 9.00E+00 | 9.00E+00 | 1.55E+05 | 1.31E+05 | 1.40E+05 |
| 2.40E+04 | 2.04E+04 | 1.97E+04 | 2.05E+04 | 2.01E+04 | 2.69E+04 | 1.72E+04 | 2.21E+04 | 1.82E+04 |
| 1.05E+04 | 1.48E+04 | 9.77E+03 | 1.03E+04 | 1.28E+04 | 9.88E+03 | 1.25E+04 | 1.10E+04 | 1.30E+04 |
| 1.26E+06 | 1.06E+06 | 1.08E+06 | 1.06E+06 | 1.00E+06 | 1.38E+06 | 8.97E+05 | 8.72E+05 | 9.28E+05 |
| 1.64E+04 | 1.37E+04 | 1.43E+04 | 1.49E+04 | 1.46E+04 | 1.41E+04 | 1.94E+04 | 2.02E+04 | 1.80E+04 |
| 5.06E+04 | 5.36E+04 | 4.55E+04 | 6.45E+04 | 5.50E+04 | 5.39E+04 | 5.55E+04 | 5.10E+04 | 4.72E+04 |
| 3.85E+04 | 3.68E+04 | 3.33E+04 | 3.93E+04 | 3.88E+04 | 3.26E+04 | 4.70E+04 | 4.59E+04 | 5.50E+04 |
| 1.41E+05 | 1.09E+05 | 1.25E+05 | 4.79E+04 | 4.71E+04 | 5.60E+04 | 2.03E+05 | 1.96E+05 | 1.87E+05 |
| 9.00E+00 | 9.00E+00 | 9.00E+00 | 9.00E+00 | 5.79E+04 | 9.00E+00 | 2.95E+05 | 2.90E+05 | 2.97E+05 |
| 1.02E+05 | 1.20E+05 | 6.15E+04 | 1.45E+05 | 7.13E+04 | 7.51E+04 | 3.18E+05 | 3.42E+05 | 3.18E+05 |
| 2.61E+04 | 2.22E+04 | 2.17E+04 | 2.24E+04 | 2.06E+04 | 1.65E+04 | 2.74E+06 | 2.68E+06 | 2.63E+06 |
| 1.07E+05 | 5.46E+04 | 1.13E+05 | 1.16E+05 | 6.84E+04 | 5.22E+04 | 3.14E+05 | 2.90E+05 | 3.25E+05 |

|          |          |          |          |          |          |          |          |          |
|----------|----------|----------|----------|----------|----------|----------|----------|----------|
| 2.94E+05 | 2.94E+05 | 2.91E+05 | 4.23E+05 | 2.98E+05 | 1.99E+05 | 5.36E+05 | 4.98E+05 | 4.57E+05 |
| 4.22E+05 | 3.69E+05 | 2.98E+05 | 4.88E+05 | 2.43E+05 | 2.29E+05 | 2.53E+06 | 2.33E+06 | 2.34E+06 |
| 4.16E+05 | 3.59E+05 | 2.91E+05 | 4.66E+05 | 1.81E+05 | 1.61E+05 | 1.60E+05 | 1.61E+05 | 1.64E+05 |
| 9.00E+00 | 9.00E+00 | 9.00E+00 | 9.00E+00 | 9.00E+00 | 9.00E+00 | 2.46E+05 | 7.29E+05 | 5.83E+05 |
| 6.98E+04 | 6.65E+04 | 7.76E+04 | 7.80E+04 | 6.96E+04 | 5.85E+04 | 3.79E+05 | 3.77E+05 | 3.11E+05 |
| 3.18E+04 | 6.28E+04 | 6.87E+04 | 5.27E+04 | 4.37E+04 | 3.47E+04 | 2.72E+05 | 1.52E+05 | 1.81E+05 |
| 5.29E+05 | 4.25E+05 | 4.69E+05 | 4.89E+05 | 4.29E+05 | 4.04E+05 | 2.42E+06 | 2.40E+06 | 2.46E+06 |
| 2.48E+05 | 2.56E+05 | 2.89E+05 | 2.66E+05 | 2.49E+05 | 2.20E+05 | 3.99E+06 | 4.21E+06 | 4.30E+06 |
| 2.67E+05 | 2.19E+05 | 2.24E+05 | 2.88E+05 | 2.78E+05 | 1.88E+05 | 7.15E+05 | 6.73E+05 | 7.04E+05 |
| 8.58E+04 | 6.02E+04 | 6.31E+04 | 7.12E+04 | 7.20E+04 | 5.85E+04 | 1.15E+06 | 1.34E+06 | 1.11E+06 |
| 7.65E+03 | 9.49E+03 | 7.70E+03 | 4.39E+03 | 5.14E+03 | 1.05E+04 | 4.76E+03 | 5.69E+03 | 5.74E+03 |
| 2.17E+05 | 2.26E+05 | 1.43E+05 | 2.98E+05 | 1.11E+05 | 1.56E+05 | 3.26E+05 | 3.90E+05 | 3.43E+05 |
| 8.37E+04 | 9.01E+04 | 6.73E+04 | 6.98E+04 | 5.62E+04 | 9.00E+00 | 5.01E+04 | 4.90E+04 | 7.46E+04 |
| 3.62E+04 | 1.97E+04 | 3.15E+04 | 2.95E+04 | 1.73E+04 | 2.57E+04 | 2.39E+05 | 2.65E+05 | 2.73E+05 |
| 1.19E+05 | 1.23E+05 | 1.99E+05 | 1.68E+05 | 1.15E+05 | 7.62E+04 | 1.36E+05 | 1.71E+05 | 1.84E+05 |
| 7.05E+03 | 7.94E+03 | 8.32E+03 | 8.40E+03 | 1.16E+04 | 6.07E+03 | 2.99E+04 | 2.48E+04 | 2.60E+04 |
| 2.66E+04 | 4.53E+04 | 5.35E+04 | 4.56E+04 | 4.84E+04 | 4.31E+04 | 6.39E+04 | 7.80E+04 | 5.75E+04 |
| 2.15E+05 | 1.87E+05 | 2.00E+05 | 2.12E+05 | 1.74E+05 | 2.38E+05 | 4.46E+05 | 3.94E+05 | 4.29E+05 |
| 5.49E+05 | 5.88E+05 | 6.54E+05 | 6.36E+05 | 7.24E+05 | 5.99E+05 | 5.96E+06 | 6.27E+06 | 6.01E+06 |
| 9.00E+00 | 9.00E+00 | 9.00E+00 | 9.00E+00 | 3.88E+03 | 3.34E+03 | 2.45E+04 | 2.22E+04 | 2.49E+04 |
| 1.31E+05 | 1.38E+05 | 1.70E+05 | 1.42E+05 | 1.54E+05 | 1.24E+05 | 6.71E+06 | 6.22E+06 | 6.40E+06 |
| 1.44E+05 | 1.24E+05 | 1.37E+05 | 1.33E+05 | 1.50E+05 | 1.54E+05 | 4.36E+06 | 4.53E+06 | 4.21E+06 |
| 1.87E+04 | 1.19E+04 | 1.57E+04 | 2.36E+04 | 2.81E+04 | 1.87E+04 | 2.82E+05 | 2.04E+05 | 2.65E+05 |
| 9.00E+00 | 9.00E+00 | 1.19E+04 | 9.00E+00 | 9.00E+00 | 9.00E+00 | 5.40E+05 | 5.36E+05 | 5.27E+05 |
| 3.94E+05 | 3.04E+05 | 3.76E+05 | 3.88E+05 | 4.12E+05 | 2.79E+05 | 7.15E+06 | 6.39E+06 | 6.21E+06 |
| 9.00E+00 | 3.27E+03 | 9.00E+00 | 1.63E+03 | 9.00E+00 | 9.00E+00 | 5.30E+04 | 3.26E+04 | 4.58E+04 |
| 8.35E+04 | 7.66E+04 | 1.01E+05 | 7.46E+04 | 9.84E+04 | 6.80E+04 | 3.93E+06 | 4.17E+06 | 4.14E+06 |
| 6.60E+04 | 5.82E+04 | 6.17E+04 | 7.04E+04 | 9.01E+04 | 4.84E+04 | 9.34E+04 | 8.80E+04 | 9.02E+04 |
| 1.88E+04 | 8.44E+03 | 1.17E+04 | 1.34E+04 | 1.77E+04 | 2.42E+04 | 4.31E+04 | 5.03E+04 | 5.96E+04 |
| 3.98E+05 | 3.56E+05 | 3.91E+05 | 4.12E+05 | 6.26E+05 | 3.98E+05 | 1.25E+06 | 1.22E+06 | 1.09E+06 |
| 1.26E+05 | 1.12E+05 | 1.14E+05 | 1.56E+05 | 2.34E+05 | 1.31E+05 | 1.35E+05 | 1.78E+05 | 1.40E+05 |
| 2.67E+05 | 2.50E+05 | 2.72E+05 | 4.01E+05 | 2.58E+05 | 2.16E+05 | 8.66E+05 | 7.73E+05 | 8.80E+05 |
| 2.04E+03 | 2.93E+03 | 2.74E+03 | 2.24E+03 | 3.72E+03 | 3.36E+03 | 1.08E+04 | 9.76E+03 | 1.28E+04 |
| 1.42E+03 | 2.16E+03 | 1.31E+03 | 1.49E+03 | 9.59E+02 | 2.51E+03 | 3.13E+04 | 2.15E+04 | 2.46E+04 |
| 9.00E+00 | 9.00E+00 | 9.00E+00 | 9.00E+00 | 5.47E+03 | 9.00E+00 | 1.20E+04 | 1.07E+04 | 1.11E+04 |
| 1.57E+04 | 1.22E+04 | 2.26E+04 | 1.46E+04 | 1.73E+04 | 1.67E+04 | 7.37E+04 | 7.11E+04 | 7.79E+04 |
| 4.38E+03 | 5.69E+03 | 7.03E+03 | 8.53E+03 | 6.36E+03 | 1.64E+03 | 3.68E+04 | 2.28E+04 | 3.55E+04 |
| 7.04E+05 | 8.01E+05 | 6.35E+05 | 7.09E+05 | 6.91E+05 | 8.74E+05 | 1.09E+06 | 1.05E+06 | 1.08E+06 |
| 2.96E+04 | 3.20E+04 | 2.48E+04 | 1.99E+04 | 1.60E+04 | 3.27E+04 | 2.71E+04 | 2.43E+04 | 2.06E+04 |
| 1.23E+05 | 6.90E+04 | 9.44E+04 | 1.75E+05 | 5.78E+04 | 6.49E+04 | 5.63E+05 | 6.13E+05 | 6.32E+05 |
| 1.44E+04 | 1.71E+04 | 1.39E+04 | 1.07E+04 | 2.56E+04 | 1.39E+04 | 1.47E+04 | 2.08E+04 | 2.43E+04 |
| 1.78E+04 | 1.53E+04 | 1.54E+04 | 1.69E+04 | 1.51E+04 | 1.33E+04 | 2.08E+04 | 1.87E+04 | 1.86E+04 |
| 1.64E+05 | 1.58E+05 | 1.52E+05 | 1.61E+05 | 1.61E+05 | 1.61E+05 | 1.91E+05 | 1.76E+05 | 1.67E+05 |
| 2.32E+06 | 2.19E+06 | 1.94E+06 | 2.81E+06 | 2.42E+06 | 1.46E+06 | 1.97E+06 | 1.61E+06 | 1.75E+06 |
| 1.19E+05 | 1.10E+05 | 9.98E+04 | 1.18E+05 | 1.24E+05 | 5.66E+04 | 7.04E+04 | 8.98E+04 | 7.45E+04 |
| 2.56E+06 | 1.92E+06 | 1.70E+06 | 2.19E+06 | 2.68E+06 | 1.67E+06 | 1.76E+06 | 1.96E+06 | 1.73E+06 |
| 2.07E+06 | 2.06E+06 | 2.15E+06 | 2.23E+06 | 1.98E+06 | 1.49E+06 | 1.50E+06 | 1.25E+06 | 1.44E+06 |
| 1.92E+05 | 1.80E+05 | 2.56E+05 | 3.87E+05 | 1.82E+05 | 1.71E+05 | 5.38E+05 | 4.83E+05 | 5.12E+05 |
| 2.28E+04 | 2.02E+04 | 2.87E+04 | 2.86E+04 | 2.20E+04 | 2.46E+04 | 2.80E+04 | 4.67E+04 | 2.49E+04 |
| 2.56E+04 | 1.13E+04 | 3.19E+04 | 3.97E+04 | 1.55E+04 | 1.83E+04 | 1.37E+04 | 1.93E+04 | 2.10E+04 |
| 7.05E+04 | 5.24E+04 | 9.85E+04 | 1.03E+05 | 6.59E+04 | 3.79E+04 | 4.42E+04 | 4.35E+04 | 3.70E+04 |
| 1.02E+06 | 1.13E+06 | 1.18E+06 | 1.36E+06 | 1.41E+06 | 1.10E+06 | 1.67E+06 | 1.96E+06 | 2.02E+06 |
| 3.10E+06 | 2.46E+06 | 3.27E+06 | 4.16E+06 | 2.72E+06 | 2.46E+06 | 1.88E+06 | 1.67E+06 | 1.63E+06 |
| 1.15E+05 | 8.93E+04 | 1.75E+05 | 1.49E+05 | 8.26E+04 | 9.00E+00 | 2.94E+05 | 3.24E+05 | 2.65E+05 |

|          |          |          |          |          |          |          |          |          |
|----------|----------|----------|----------|----------|----------|----------|----------|----------|
| 1.01E+07 | 9.21E+06 | 1.21E+07 | 1.39E+07 | 1.08E+07 | 8.24E+06 | 6.18E+06 | 6.27E+06 | 6.27E+06 |
| 8.22E+05 | 7.59E+05 | 6.59E+05 | 1.04E+06 | 6.52E+05 | 5.70E+05 | 4.00E+05 | 3.89E+05 | 3.71E+05 |
| 1.07E+05 | 9.47E+04 | 1.46E+05 | 1.40E+05 | 1.09E+05 | 9.45E+04 | 6.94E+04 | 6.81E+04 | 7.53E+04 |
| 1.50E+04 | 1.52E+04 | 1.23E+04 | 1.61E+04 | 9.05E+03 | 9.00E+00 | 1.76E+04 | 1.95E+04 | 2.00E+04 |
| 7.06E+05 | 8.19E+05 | 9.23E+05 | 7.67E+05 | 5.55E+05 | 5.29E+05 | 8.11E+05 | 8.92E+05 | 9.05E+05 |
| 1.54E+05 | 1.70E+05 | 1.55E+05 | 1.87E+05 | 1.66E+05 | 1.71E+05 | 1.87E+05 | 1.81E+05 | 1.78E+05 |
| 4.41E+04 | 3.97E+04 | 5.48E+04 | 5.64E+04 | 4.36E+04 | 3.75E+04 | 6.54E+04 | 5.81E+04 | 5.53E+04 |
| 2.19E+04 | 3.06E+04 | 4.02E+04 | 5.00E+04 | 4.22E+04 | 2.35E+04 | 3.70E+04 | 3.85E+04 | 2.74E+04 |
| 8.12E+04 | 7.45E+04 | 9.19E+04 | 8.39E+04 | 6.72E+04 | 7.36E+04 | 6.88E+04 | 6.65E+04 | 5.51E+04 |
| 1.77E+05 | 1.67E+05 | 1.77E+05 | 2.03E+05 | 1.43E+05 | 1.30E+05 | 1.58E+05 | 1.72E+05 | 1.99E+05 |
| 7.92E+06 | 7.92E+06 | 8.33E+06 | 8.32E+06 | 7.04E+06 | 7.92E+06 | 3.58E+07 | 3.61E+07 | 3.61E+07 |
| 1.62E+06 | 1.32E+06 | 1.69E+06 | 1.60E+06 | 8.21E+05 | 1.09E+06 | 1.40E+06 | 1.36E+06 | 1.35E+06 |
| 4.48E+04 | 4.25E+04 | 8.17E+04 | 6.41E+04 | 5.75E+04 | 5.48E+04 | 4.59E+04 | 4.71E+04 | 4.69E+04 |
| 4.97E+05 | 5.09E+05 | 3.81E+05 | 4.60E+05 | 5.50E+05 | 3.37E+05 | 1.14E+06 | 1.08E+06 | 1.16E+06 |
| 5.35E+04 | 4.42E+04 | 5.24E+04 | 7.22E+04 | 4.43E+04 | 1.09E+04 | 7.85E+04 | 9.46E+04 | 8.30E+04 |
| 9.90E+06 | 9.42E+06 | 1.13E+07 | 9.80E+06 | 1.12E+07 | 1.10E+07 | 8.10E+06 | 7.59E+06 | 8.37E+06 |
| 7.78E+05 | 7.46E+05 | 7.49E+05 | 1.05E+06 | 7.01E+05 | 5.19E+05 | 4.14E+05 | 3.96E+05 | 4.61E+05 |
| 1.47E+06 | 1.54E+06 | 1.97E+06 | 2.09E+06 | 1.68E+06 | 1.27E+06 | 1.14E+06 | 1.14E+06 | 1.29E+06 |
| 2.38E+05 | 2.66E+05 | 3.57E+05 | 2.45E+05 | 2.50E+05 | 2.75E+05 | 2.70E+05 | 2.37E+05 | 2.27E+05 |
| 1.25E+05 | 5.93E+04 | 2.07E+05 | 1.57E+05 | 1.76E+05 | 6.95E+04 | 3.17E+06 | 2.87E+06 | 2.97E+06 |
| 1.11E+06 | 5.17E+05 | 1.53E+06 | 1.43E+06 | 1.76E+06 | 1.25E+06 | 1.12E+06 | 1.23E+06 | 1.21E+06 |
| 4.80E+05 | 4.87E+05 | 5.17E+05 | 5.24E+05 | 4.44E+05 | 5.09E+05 | 5.81E+05 | 6.03E+05 | 5.77E+05 |
| 4.31E+05 | 4.23E+05 | 5.11E+05 | 4.50E+05 | 5.31E+05 | 4.34E+05 | 7.16E+05 | 6.96E+05 | 7.05E+05 |
| 5.13E+04 | 4.55E+04 | 5.63E+04 | 2.56E+04 | 4.24E+04 | 2.52E+04 | 9.50E+05 | 1.07E+06 | 1.04E+06 |
| 9.00E+06 | 8.25E+06 | 8.73E+06 | 9.85E+06 | 8.87E+06 | 8.37E+06 | 8.00E+06 | 7.99E+06 | 8.05E+06 |
| 1.93E+05 | 1.49E+05 | 1.89E+05 | 2.22E+05 | 1.50E+05 | 1.54E+05 | 6.15E+05 | 5.40E+05 | 5.85E+05 |
| 1.10E+07 | 1.23E+07 | 1.47E+07 | 1.46E+07 | 1.23E+07 | 1.13E+07 | 7.38E+07 | 6.84E+07 | 7.32E+07 |
| 2.01E+06 | 1.64E+06 | 2.04E+06 | 2.35E+06 | 1.38E+06 | 1.33E+06 | 3.20E+06 | 2.92E+06 | 3.08E+06 |
| 1.00E+05 | 1.11E+05 | 1.56E+05 | 1.57E+05 | 1.01E+05 | 1.14E+05 | 8.86E+05 | 8.19E+05 | 9.47E+05 |
| 6.95E+06 | 9.93E+06 | 1.31E+07 | 9.80E+06 | 1.22E+07 | 1.21E+07 | 9.95E+06 | 1.07E+07 | 1.17E+07 |
| 7.57E+07 | 7.07E+07 | 7.41E+07 | 7.83E+07 | 7.71E+07 | 7.00E+07 | 4.52E+08 | 4.35E+08 | 4.36E+08 |
| 1.58E+07 | 1.39E+07 | 1.57E+07 | 1.71E+07 | 1.27E+07 | 1.42E+07 | 2.86E+07 | 2.65E+07 | 2.72E+07 |
| 1.75E+07 | 1.81E+07 | 1.97E+07 | 2.13E+07 | 1.81E+07 | 1.60E+07 | 1.36E+07 | 1.31E+07 | 1.29E+07 |
| 9.91E+07 | 9.14E+07 | 9.11E+07 | 1.15E+08 | 9.28E+07 | 8.33E+07 | 5.66E+07 | 5.10E+07 | 5.13E+07 |
| 2.93E+05 | 3.17E+05 | 4.03E+05 | 2.55E+05 | 2.47E+05 | 3.06E+05 | 4.57E+06 | 4.11E+06 | 4.25E+06 |
| 4.27E+05 | 6.28E+05 | 5.20E+05 | 5.89E+05 | 4.79E+05 | 4.49E+05 | 8.05E+05 | 7.88E+05 | 8.65E+05 |
| 1.04E+07 | 9.48E+06 | 1.10E+07 | 1.02E+07 | 1.02E+07 | 1.06E+07 | 9.43E+06 | 8.43E+06 | 8.57E+06 |
| 1.54E+07 | 1.75E+07 | 1.98E+07 | 1.94E+07 | 1.31E+07 | 1.66E+07 | 1.58E+07 | 1.52E+07 | 1.67E+07 |
| 2.12E+07 | 2.19E+07 | 2.00E+07 | 2.20E+07 | 2.12E+07 | 1.68E+07 | 1.15E+07 | 1.19E+07 | 1.20E+07 |
| 1.37E+04 | 2.13E+04 | 1.79E+04 | 1.53E+04 | 1.81E+04 | 1.63E+04 | 7.90E+04 | 7.78E+04 | 7.64E+04 |
| 2.73E+04 | 2.85E+04 | 3.27E+04 | 3.27E+04 | 3.20E+04 | 2.81E+04 | 1.56E+05 | 1.58E+05 | 1.57E+05 |
| 2.78E+06 | 2.58E+06 | 3.91E+06 | 2.75E+06 | 2.85E+06 | 3.27E+06 | 3.97E+06 | 3.78E+06 | 3.78E+06 |
| 1.23E+07 | 1.31E+07 | 1.42E+07 | 1.37E+07 | 1.43E+07 | 1.22E+07 | 1.35E+07 | 1.29E+07 | 1.19E+07 |
| 2.40E+05 | 2.43E+05 | 2.04E+05 | 2.19E+05 | 2.53E+05 | 2.79E+05 | 6.93E+05 | 7.35E+05 | 7.53E+05 |
| 4.17E+03 | 4.44E+03 | 5.27E+03 | 4.76E+03 | 4.40E+03 | 3.36E+03 | 6.17E+03 | 6.48E+03 | 5.79E+03 |
| 5.49E+05 | 4.27E+05 | 4.77E+05 | 5.58E+05 | 2.81E+05 | 2.49E+05 | 2.18E+05 | 2.39E+05 | 2.19E+05 |
| 4.53E+05 | 2.24E+05 | 7.92E+05 | 4.72E+05 | 4.32E+05 | 5.62E+05 | 2.42E+05 | 2.58E+05 | 2.33E+05 |
| 1.12E+06 | 1.09E+06 | 1.39E+06 | 1.22E+06 | 8.19E+05 | 1.08E+06 | 8.04E+05 | 8.32E+05 | 8.61E+05 |
| 3.15E+06 | 3.13E+06 | 4.46E+06 | 3.85E+06 | 4.11E+06 | 2.80E+06 | 2.12E+06 | 1.91E+06 | 2.11E+06 |
| 1.31E+05 | 1.09E+05 | 1.34E+05 | 1.51E+05 | 1.17E+05 | 9.35E+04 | 5.84E+04 | 6.26E+04 | 5.34E+04 |
| 7.01E+04 | 6.35E+04 | 9.48E+04 | 1.00E+05 | 6.87E+04 | 8.28E+04 | 4.64E+04 | 4.59E+04 | 5.19E+04 |
| 4.77E+07 | 4.48E+07 | 5.48E+07 | 6.25E+07 | 5.72E+07 | 4.66E+07 | 3.37E+07 | 3.50E+07 | 3.54E+07 |
| 5.76E+05 | 4.99E+05 | 5.68E+05 | 5.56E+05 | 6.60E+05 | 5.06E+05 | 7.39E+05 | 7.37E+05 | 7.16E+05 |
| 1.40E+05 | 1.13E+05 | 9.80E+04 | 1.47E+05 | 1.57E+04 | 8.36E+04 | 1.28E+05 | 1.38E+05 | 1.20E+05 |

|          |          |          |          |          |          |          |          |          |
|----------|----------|----------|----------|----------|----------|----------|----------|----------|
| 8.50E+05 | 1.13E+06 | 9.21E+05 | 8.33E+05 | 6.77E+05 | 7.87E+05 | 1.42E+06 | 1.45E+06 | 1.49E+06 |
| 2.25E+06 | 2.07E+06 | 1.73E+06 | 2.67E+06 | 1.39E+06 | 2.08E+06 | 1.20E+06 | 1.30E+06 | 1.21E+06 |
| 4.66E+05 | 5.42E+05 | 5.50E+05 | 5.25E+05 | 5.09E+05 | 4.74E+05 | 2.85E+05 | 2.95E+05 | 2.91E+05 |
| 1.49E+05 | 1.29E+05 | 9.00E+04 | 1.59E+05 | 1.15E+05 | 8.86E+04 | 6.56E+04 | 6.77E+04 | 6.87E+04 |
| 2.50E+05 | 2.56E+05 | 3.02E+05 | 2.40E+05 | 1.77E+05 | 2.35E+05 | 2.22E+05 | 1.97E+05 | 1.71E+05 |
| 8.96E+06 | 9.45E+06 | 1.13E+07 | 9.11E+06 | 8.73E+06 | 1.06E+07 | 7.76E+06 | 7.66E+06 | 7.21E+06 |
| 8.79E+06 | 9.47E+06 | 1.12E+07 | 8.15E+06 | 7.69E+06 | 9.31E+06 | 6.35E+06 | 7.20E+06 | 6.61E+06 |
| 5.07E+04 | 3.73E+04 | 5.12E+04 | 2.02E+04 | 5.37E+04 | 3.28E+04 | 1.34E+05 | 1.35E+05 | 1.22E+05 |
| 7.11E+07 | 6.07E+07 | 5.76E+07 | 6.12E+07 | 6.73E+07 | 4.84E+07 | 1.07E+08 | 1.23E+08 | 1.05E+08 |
| 2.79E+05 | 2.48E+05 | 3.13E+05 | 2.85E+05 | 3.23E+05 | 2.86E+05 | 5.97E+05 | 5.48E+05 | 5.31E+05 |
| 4.62E+06 | 3.80E+06 | 4.13E+06 | 4.08E+06 | 3.99E+06 | 3.44E+06 | 1.76E+07 | 1.74E+07 | 1.68E+07 |
| 1.13E+07 | 1.51E+07 | 1.52E+07 | 1.55E+07 | 1.05E+07 | 1.55E+07 | 1.30E+07 | 1.28E+07 | 1.29E+07 |
| 3.73E+07 | 3.42E+07 | 3.14E+07 | 3.14E+07 | 3.29E+07 | 2.81E+07 | 3.05E+07 | 3.28E+07 | 3.19E+07 |
| 1.29E+07 | 1.10E+07 | 1.15E+07 | 1.08E+07 | 1.26E+07 | 1.09E+07 | 6.14E+06 | 6.59E+06 | 6.12E+06 |
| 9.92E+06 | 9.73E+06 | 1.14E+07 | 9.36E+06 | 1.25E+07 | 1.12E+07 | 1.32E+07 | 1.26E+07 | 1.34E+07 |
| 9.00E+00 | 9.00E+00 | 9.00E+00 | 9.92E+03 | 9.00E+00 | 9.00E+00 | 3.45E+04 | 3.58E+04 | 3.38E+04 |
| 4.08E+05 | 3.97E+05 | 4.09E+05 | 3.92E+05 | 3.85E+05 | 3.56E+05 | 1.53E+06 | 1.53E+06 | 1.43E+06 |
| 8.84E+05 | 6.37E+05 | 7.25E+05 | 6.01E+05 | 8.02E+05 | 5.06E+05 | 4.31E+05 | 4.11E+05 | 4.27E+05 |
| 1.27E+07 | 1.24E+07 | 1.15E+07 | 1.15E+07 | 1.41E+07 | 1.13E+07 | 8.97E+06 | 9.67E+06 | 8.87E+06 |
| 3.57E+05 | 3.70E+05 | 3.55E+05 | 3.71E+05 | 3.06E+05 | 2.86E+05 | 8.77E+05 | 8.86E+05 | 7.95E+05 |
| 9.41E+03 | 9.00E+00 | 9.00E+00 | 9.00E+00 | 9.00E+00 | 1.42E+04 | 6.63E+04 | 6.34E+04 | 6.12E+04 |
| 5.47E+06 | 4.58E+06 | 7.47E+06 | 5.93E+06 | 4.03E+06 | 6.72E+06 | 1.01E+07 | 9.61E+06 | 9.98E+06 |
| 6.15E+06 | 5.92E+06 | 9.10E+06 | 6.29E+06 | 6.65E+06 | 6.17E+06 | 5.15E+06 | 5.04E+06 | 5.23E+06 |
| 2.04E+05 | 1.92E+05 | 2.79E+05 | 2.19E+05 | 1.83E+05 | 2.18E+05 | 4.57E+05 | 4.35E+05 | 4.86E+05 |
| 1.21E+05 | 1.48E+05 | 1.67E+05 | 1.34E+05 | 3.19E+04 | 1.51E+05 | 9.98E+04 | 1.21E+05 | 8.84E+04 |
| 9.00E+00 | 1.16E+04 | 9.00E+00 | 9.00E+00 | 9.00E+00 | 9.00E+00 | 1.46E+05 | 1.58E+05 | 1.44E+05 |
| 1.85E+05 | 1.69E+05 | 2.29E+05 | 2.07E+05 | 1.40E+05 | 1.92E+05 | 1.11E+06 | 1.07E+06 | 1.06E+06 |
| 2.85E+06 | 2.76E+06 | 4.15E+06 | 2.49E+06 | 2.54E+06 | 3.46E+06 | 3.85E+06 | 3.78E+06 | 3.64E+06 |
| 4.79E+05 | 3.82E+05 | 3.29E+05 | 4.91E+05 | 2.70E+05 | 3.09E+05 | 2.16E+05 | 2.23E+05 | 2.62E+05 |
| 1.29E+04 | 1.33E+04 | 1.53E+04 | 1.50E+04 | 1.25E+04 | 1.29E+04 | 5.13E+05 | 5.17E+05 | 5.06E+05 |
| 9.00E+00 | 9.00E+00 | 1.76E+04 | 9.00E+00 | 9.00E+00 | 9.00E+00 | 2.94E+05 | 2.94E+05 | 3.07E+05 |
| 1.16E+05 | 1.06E+05 | 1.47E+05 | 1.41E+05 | 1.04E+05 | 1.49E+05 | 1.35E+05 | 1.42E+05 | 1.21E+05 |
| 1.91E+06 | 1.72E+06 | 2.57E+06 | 1.99E+06 | 1.73E+06 | 1.75E+06 | 2.14E+06 | 2.27E+06 | 2.15E+06 |
| 3.40E+05 | 3.64E+05 | 2.82E+05 | 3.71E+05 | 3.32E+05 | 3.34E+05 | 5.23E+05 | 5.08E+05 | 5.78E+05 |
| 5.51E+06 | 5.22E+06 | 7.05E+06 | 6.24E+06 | 6.93E+06 | 6.71E+06 | 4.14E+06 | 4.15E+06 | 4.58E+06 |
| 2.72E+05 | 2.70E+05 | 3.80E+05 | 3.72E+05 | 4.36E+05 | 3.79E+05 | 2.75E+05 | 2.50E+05 | 2.33E+05 |
| 2.75E+05 | 2.76E+05 | 3.59E+05 | 3.33E+05 | 4.04E+05 | 3.48E+05 | 2.05E+05 | 2.63E+05 | 2.36E+05 |
| 2.84E+05 | 3.15E+05 | 2.82E+05 | 3.28E+05 | 2.65E+05 | 2.96E+05 | 1.80E+05 | 1.88E+05 | 1.96E+05 |
| 4.94E+05 | 5.89E+05 | 5.30E+05 | 6.02E+05 | 5.41E+05 | 4.96E+05 | 2.57E+05 | 2.43E+05 | 2.74E+05 |
| 2.61E+06 | 2.74E+06 | 3.77E+06 | 2.77E+06 | 3.62E+06 | 3.31E+06 | 1.87E+06 | 1.89E+06 | 1.89E+06 |
| 2.94E+05 | 2.71E+05 | 2.71E+05 | 3.35E+05 | 2.92E+05 | 1.83E+05 | 1.45E+05 | 1.31E+05 | 1.39E+05 |
| 3.70E+04 | 3.25E+04 | 2.04E+04 | 4.07E+04 | 4.28E+04 | 1.64E+04 | 3.48E+04 | 3.28E+04 | 3.64E+04 |
| 8.89E+04 | 9.50E+04 | 1.17E+05 | 7.59E+04 | 1.33E+05 | 1.33E+05 | 6.13E+04 | 5.06E+04 | 5.79E+04 |
| 1.54E+06 | 1.68E+06 | 1.81E+06 | 1.57E+06 | 1.98E+06 | 1.56E+06 | 1.17E+06 | 1.13E+06 | 1.31E+06 |
| 2.81E+05 | 2.63E+05 | 3.66E+05 | 3.73E+05 | 2.49E+05 | 2.94E+05 | 1.66E+05 | 1.79E+05 | 1.49E+05 |
| 5.10E+06 | 4.21E+06 | 4.52E+06 | 4.15E+06 | 3.23E+06 | 4.55E+06 | 1.07E+07 | 1.02E+07 | 1.06E+07 |
| 1.96E+07 | 1.63E+07 | 1.86E+07 | 1.82E+07 | 1.57E+07 | 2.24E+07 | 2.43E+07 | 2.48E+07 | 2.52E+07 |
| 1.40E+07 | 1.18E+07 | 1.42E+07 | 1.18E+07 | 1.21E+07 | 1.64E+07 | 1.76E+07 | 1.63E+07 | 1.72E+07 |
| 8.46E+04 | 5.99E+04 | 1.00E+05 | 8.16E+04 | 5.66E+04 | 7.48E+04 | 6.92E+04 | 6.73E+04 | 8.45E+04 |
| 2.86E+06 | 2.60E+06 | 2.39E+06 | 2.72E+06 | 2.08E+06 | 2.38E+06 | 3.04E+06 | 3.36E+06 | 3.04E+06 |
| 3.75E+05 | 4.76E+05 | 5.44E+05 | 4.38E+05 | 3.16E+05 | 4.37E+05 | 3.34E+05 | 3.36E+05 | 4.02E+05 |
| 7.33E+04 | 6.75E+04 | 7.42E+04 | 7.76E+04 | 4.32E+04 | 7.92E+04 | 3.89E+04 | 5.57E+04 | 4.92E+04 |
| 7.91E+04 | 7.80E+04 | 1.28E+05 | 9.37E+04 | 9.26E+04 | 8.27E+04 | 1.48E+05 | 1.77E+05 | 1.48E+05 |
| 7.29E+06 | 6.54E+06 | 8.13E+06 | 7.00E+06 | 6.50E+06 | 7.42E+06 | 9.43E+06 | 9.23E+06 | 9.38E+06 |



|          |          |          |          |          |          |          |          |          |
|----------|----------|----------|----------|----------|----------|----------|----------|----------|
| 2.72E+05 | 2.64E+05 | 2.80E+05 | 2.94E+05 | 1.58E+05 | 2.49E+05 | 2.00E+05 | 2.37E+05 | 2.21E+05 |
| 5.28E+04 | 3.27E+04 | 9.45E+04 | 5.92E+04 | 3.86E+04 | 2.44E+04 | 1.09E+05 | 1.06E+05 | 8.73E+04 |
| 4.20E+06 | 4.15E+06 | 4.33E+06 | 4.43E+06 | 3.62E+06 | 4.82E+06 | 7.66E+06 | 8.21E+06 | 7.31E+06 |
| 1.42E+06 | 1.71E+06 | 1.86E+06 | 1.91E+06 | 1.28E+06 | 1.66E+06 | 8.48E+05 | 9.21E+05 | 8.84E+05 |
| 1.08E+05 | 1.01E+05 | 1.37E+05 | 8.67E+04 | 1.21E+05 | 1.35E+05 | 9.84E+04 | 9.07E+04 | 8.89E+04 |
| 4.52E+05 | 3.72E+05 | 5.38E+05 | 4.22E+05 | 4.71E+05 | 4.67E+05 | 5.03E+06 | 4.92E+06 | 5.04E+06 |
| 1.15E+06 | 9.90E+05 | 1.64E+06 | 1.42E+06 | 1.46E+06 | 1.38E+06 | 8.64E+05 | 9.74E+05 | 9.87E+05 |
| 4.69E+07 | 4.28E+07 | 5.46E+07 | 4.54E+07 | 5.68E+07 | 5.83E+07 | 6.03E+07 | 6.47E+07 | 5.91E+07 |
| 4.96E+05 | 4.44E+05 | 6.07E+05 | 4.46E+05 | 6.05E+05 | 5.78E+05 | 5.03E+05 | 5.18E+05 | 5.33E+05 |
| 4.23E+04 | 3.70E+04 | 2.59E+04 | 5.24E+04 | 2.78E+04 | 5.36E+04 | 7.19E+04 | 7.29E+04 | 4.41E+04 |
| 5.50E+05 | 5.00E+05 | 6.77E+05 | 6.06E+05 | 5.85E+05 | 7.30E+05 | 9.41E+05 | 8.06E+05 | 9.32E+05 |
| 8.20E+05 | 7.08E+05 | 6.84E+05 | 7.96E+05 | 7.79E+05 | 4.26E+05 | 4.47E+05 | 3.64E+05 | 4.19E+05 |
| 4.44E+05 | 4.73E+05 | 5.43E+05 | 4.84E+05 | 3.57E+05 | 3.46E+05 | 1.50E+06 | 1.73E+06 | 1.45E+06 |
| 5.28E+04 | 6.62E+04 | 7.25E+04 | 7.03E+04 | 4.72E+04 | 5.57E+04 | 1.45E+05 | 1.32E+05 | 1.45E+05 |
| 4.14E+07 | 2.77E+07 | 2.92E+07 | 2.68E+07 | 3.14E+07 | 2.95E+07 | 3.45E+07 | 3.49E+07 | 3.37E+07 |
| 4.24E+03 | 3.58E+03 | 3.02E+03 | 3.59E+03 | 2.62E+03 | 2.80E+03 | 5.65E+04 | 5.36E+04 | 5.38E+04 |
| 1.78E+04 | 1.68E+04 | 1.30E+04 | 1.37E+04 | 1.38E+04 | 1.30E+04 | 3.47E+05 | 3.43E+05 | 3.59E+05 |
| 3.71E+04 | 4.30E+04 | 3.37E+04 | 3.43E+04 | 3.68E+04 | 3.29E+04 | 4.40E+04 | 3.85E+04 | 4.69E+04 |
| 3.01E+05 | 2.82E+05 | 4.00E+05 | 1.48E+05 | 3.57E+05 | 3.14E+05 | 1.14E+06 | 1.02E+06 | 1.10E+06 |
| 6.57E+05 | 6.54E+05 | 7.15E+05 | 7.93E+05 | 6.29E+05 | 5.51E+05 | 5.56E+05 | 5.33E+05 | 5.28E+05 |
| 1.50E+05 | 1.79E+05 | 1.72E+05 | 1.96E+05 | 1.41E+05 | 1.80E+05 | 3.74E+05 | 3.95E+05 | 3.58E+05 |
| 3.50E+06 | 3.22E+06 | 3.94E+06 | 3.69E+06 | 3.40E+06 | 3.74E+06 | 3.40E+06 | 3.56E+06 | 3.48E+06 |
| 2.35E+06 | 2.19E+06 | 2.92E+06 | 2.49E+06 | 2.75E+06 | 2.44E+06 | 1.03E+07 | 1.01E+07 | 9.57E+06 |
| 2.07E+06 | 2.06E+06 | 2.47E+06 | 2.02E+06 | 2.31E+06 | 2.18E+06 | 3.62E+06 | 4.32E+06 | 3.54E+06 |
| 4.07E+06 | 4.96E+06 | 5.02E+06 | 4.89E+06 | 5.03E+06 | 4.55E+06 | 5.54E+06 | 5.42E+06 | 5.63E+06 |
| 1.39E+07 | 1.52E+07 | 1.84E+07 | 1.67E+07 | 1.94E+07 | 1.83E+07 | 2.53E+07 | 2.67E+07 | 2.76E+07 |
| 1.31E+06 | 1.17E+06 | 1.26E+06 | 1.15E+06 | 1.29E+06 | 1.20E+06 | 1.47E+06 | 1.42E+06 | 1.28E+06 |
| 2.02E+05 | 1.76E+05 | 1.73E+05 | 1.78E+05 | 1.83E+05 | 1.28E+05 | 1.44E+05 | 1.45E+05 | 1.66E+05 |
| 1.18E+06 | 1.16E+06 | 1.16E+06 | 1.22E+06 | 1.11E+06 | 1.16E+06 | 2.46E+06 | 2.11E+06 | 2.40E+06 |
| 6.66E+06 | 6.51E+06 | 8.39E+06 | 7.41E+06 | 9.29E+06 | 9.91E+06 | 1.56E+07 | 1.61E+07 | 1.38E+07 |
| 3.55E+05 | 3.75E+05 | 3.27E+05 | 4.21E+05 | 3.95E+05 | 3.05E+05 | 5.68E+05 | 5.56E+05 | 3.96E+05 |
| 4.02E+06 | 3.38E+06 | 4.05E+06 | 4.35E+06 | 3.91E+06 | 4.64E+06 | 8.60E+06 | 8.64E+06 | 7.90E+06 |
| 2.85E+06 | 3.08E+06 | 3.84E+06 | 3.19E+06 | 3.27E+06 | 3.20E+06 | 1.61E+07 | 1.69E+07 | 1.63E+07 |
| 5.91E+05 | 4.66E+05 | 7.49E+05 | 4.78E+05 | 4.85E+05 | 6.46E+05 | 3.18E+05 | 3.53E+05 | 3.56E+05 |
| 7.91E+06 | 7.35E+06 | 1.01E+07 | 7.80E+06 | 8.24E+06 | 8.11E+06 | 1.03E+07 | 1.04E+07 | 9.91E+06 |
| 2.43E+07 | 2.30E+07 | 2.99E+07 | 2.48E+07 | 2.67E+07 | 2.33E+07 | 1.55E+08 | 1.62E+08 | 1.57E+08 |
| 3.29E+06 | 2.87E+06 | 3.06E+06 | 2.96E+06 | 2.83E+06 | 2.88E+06 | 4.15E+06 | 4.49E+06 | 3.93E+06 |
| 1.41E+07 | 1.48E+07 | 1.95E+07 | 1.56E+07 | 1.98E+07 | 1.69E+07 | 1.91E+07 | 1.79E+07 | 1.84E+07 |
| 4.07E+06 | 3.73E+06 | 3.67E+06 | 3.98E+06 | 3.48E+06 | 3.95E+06 | 2.71E+06 | 2.85E+06 | 2.80E+06 |
| 9.97E+05 | 8.65E+05 | 1.11E+06 | 1.10E+06 | 8.49E+05 | 1.01E+06 | 9.57E+05 | 1.01E+06 | 9.12E+05 |
| 5.60E+06 | 5.01E+06 | 6.37E+06 | 5.50E+06 | 6.31E+06 | 5.92E+06 | 8.14E+06 | 8.88E+06 | 7.89E+06 |
| 6.97E+04 | 6.06E+04 | 7.58E+04 | 4.31E+04 | 6.15E+04 | 1.12E+05 | 2.58E+05 | 2.13E+05 | 2.47E+05 |
| 8.57E+06 | 8.88E+06 | 1.11E+07 | 1.03E+07 | 1.09E+07 | 1.06E+07 | 2.31E+07 | 2.39E+07 | 2.37E+07 |
| 3.19E+05 | 3.45E+05 | 4.82E+05 | 3.52E+05 | 4.15E+05 | 4.16E+05 | 1.57E+06 | 1.51E+06 | 1.63E+06 |
| 6.07E+04 | 1.43E+05 | 1.71E+05 | 1.50E+05 | 1.59E+05 | 1.47E+05 | 2.82E+05 | 2.92E+05 | 2.79E+05 |
| 9.13E+05 | 1.18E+06 | 1.40E+06 | 1.05E+06 | 1.27E+06 | 1.15E+06 | 1.57E+06 | 1.62E+06 | 1.41E+06 |
| 4.42E+05 | 2.77E+05 | 6.05E+05 | 4.60E+05 | 5.45E+05 | 1.95E+05 | 3.57E+05 | 3.74E+05 | 3.78E+05 |
| 1.17E+05 | 1.12E+05 | 1.11E+05 | 1.02E+05 | 1.66E+05 | 1.25E+05 | 9.68E+04 | 7.94E+04 | 6.27E+04 |
| 6.39E+03 | 4.86E+03 | 9.01E+03 | 6.62E+03 | 4.97E+03 | 9.90E+03 | 6.04E+03 | 4.85E+03 | 3.56E+03 |
| 1.91E+04 | 2.33E+04 | 1.80E+04 | 1.93E+04 | 2.03E+04 | 2.44E+04 | 1.52E+04 | 1.70E+04 | 1.46E+04 |
| 6.40E+03 | 9.06E+03 | 5.93E+03 | 6.47E+03 | 7.66E+03 | 5.79E+03 | 1.05E+04 | 1.11E+04 | 9.34E+03 |
| 1.73E+05 | 2.03E+05 | 1.59E+05 | 1.91E+05 | 1.78E+05 | 1.63E+05 | 2.50E+05 | 2.36E+05 | 2.39E+05 |
| 1.32E+04 | 1.22E+04 | 1.23E+04 | 9.46E+03 | 9.43E+03 | 9.78E+03 | 1.59E+04 | 1.74E+04 | 1.35E+04 |
| 4.92E+03 | 4.45E+03 | 5.31E+03 | 5.12E+03 | 4.94E+03 | 3.12E+03 | 6.26E+03 | 4.87E+03 | 4.92E+03 |

|          |          |          |          |          |          |          |          |          |
|----------|----------|----------|----------|----------|----------|----------|----------|----------|
| 2.93E+06 | 2.20E+06 | 2.31E+06 | 2.09E+06 | 3.01E+06 | 2.67E+06 | 3.58E+06 | 3.19E+06 | 2.60E+06 |
| 2.03E+04 | 1.95E+04 | 1.88E+04 | 2.17E+04 | 2.26E+04 | 2.06E+04 | 2.14E+04 | 2.13E+04 | 2.12E+04 |
| 2.08E+05 | 1.86E+05 | 1.90E+05 | 1.99E+05 | 2.14E+05 | 1.85E+05 | 2.24E+05 | 2.37E+05 | 2.21E+05 |
| 4.29E+06 | 4.34E+06 | 4.08E+06 | 4.45E+06 | 4.19E+06 | 4.05E+06 | 4.95E+06 | 4.89E+06 | 4.64E+06 |
| 1.90E+05 | 1.63E+05 | 1.53E+05 | 1.31E+05 | 1.63E+05 | 1.87E+05 | 9.72E+04 | 1.20E+05 | 1.21E+05 |
| 6.10E+04 | 5.91E+04 | 8.41E+04 | 9.99E+04 | 8.40E+04 | 7.11E+04 | 4.95E+04 | 3.99E+04 | 6.41E+04 |
| 2.59E+04 | 2.93E+04 | 2.52E+04 | 4.80E+04 | 2.92E+04 | 2.09E+04 | 3.33E+04 | 3.54E+04 | 3.35E+04 |
| 1.27E+04 | 3.94E+04 | 5.51E+04 | 5.97E+04 | 3.92E+04 | 4.35E+04 | 7.31E+04 | 7.31E+04 | 6.39E+04 |
| 2.13E+04 | 1.97E+04 | 1.13E+04 | 1.30E+04 | 3.27E+04 | 2.38E+04 | 4.34E+04 | 3.43E+04 | 3.00E+04 |
| 1.11E+05 | 1.43E+05 | 1.35E+05 | 1.54E+05 | 1.34E+05 | 1.29E+05 | 1.35E+05 | 1.56E+05 | 1.66E+05 |
| 8.03E+04 | 3.50E+04 | 6.15E+04 | 5.32E+04 | 8.88E+04 | 3.35E+04 | 4.26E+04 | 4.58E+04 | 6.64E+04 |
| 1.43E+05 | 1.58E+05 | 1.69E+05 | 1.85E+05 | 1.29E+05 | 1.12E+05 | 1.63E+05 | 1.89E+05 | 1.66E+05 |
| 9.00E+00 | 9.00E+00 | 6.98E+03 | 9.00E+00 | 9.00E+00 | 9.33E+03 | 5.85E+04 | 5.21E+04 | 4.92E+04 |
| 4.43E+04 | 4.97E+04 | 5.66E+04 | 4.42E+04 | 4.50E+04 | 4.77E+04 | 8.72E+05 | 8.62E+05 | 8.71E+05 |
| 1.41E+06 | 1.43E+06 | 2.08E+06 | 1.58E+06 | 1.90E+06 | 1.36E+06 | 2.40E+07 | 2.04E+07 | 2.33E+07 |
| 8.03E+05 | 7.63E+05 | 8.30E+05 | 9.60E+05 | 5.65E+05 | 4.26E+05 | 2.08E+06 | 2.03E+06 | 1.85E+06 |
| 5.88E+05 | 4.86E+05 | 5.73E+05 | 6.12E+05 | 6.10E+05 | 5.44E+05 | 2.63E+06 | 2.60E+06 | 2.93E+06 |
| 1.06E+07 | 9.06E+06 | 8.01E+06 | 1.00E+07 | 4.89E+06 | 6.30E+06 | 1.64E+07 | 1.83E+07 | 1.60E+07 |
| 5.92E+05 | 5.32E+05 | 4.76E+05 | 6.79E+05 | 5.54E+05 | 3.90E+05 | 4.29E+05 | 4.26E+05 | 4.97E+05 |
| 9.00E+00 | 9.00E+00 | 9.00E+00 | 9.00E+00 | 9.00E+00 | 9.00E+00 | 1.73E+05 | 2.16E+05 | 2.82E+05 |
| 1.42E+06 | 1.75E+06 | 1.55E+06 | 1.88E+06 | 1.49E+06 | 1.38E+06 | 1.40E+06 | 1.41E+06 | 1.31E+06 |
| 3.65E+07 | 4.07E+07 | 3.72E+07 | 4.34E+07 | 3.68E+07 | 3.51E+07 | 3.44E+07 | 3.93E+07 | 3.95E+07 |
| 4.75E+06 | 3.03E+06 | 2.46E+06 | 4.94E+06 | 5.31E+06 | 2.42E+06 | 2.43E+06 | 2.59E+06 | 2.76E+06 |
| 9.90E+05 | 1.30E+06 | 1.27E+06 | 1.22E+06 | 8.84E+05 | 7.52E+05 | 7.71E+06 | 8.26E+06 | 8.11E+06 |
| 3.89E+06 | 4.12E+06 | 1.90E+06 | 4.37E+06 | 1.69E+06 | 1.67E+06 | 2.54E+06 | 2.68E+06 | 2.58E+06 |
| 7.38E+05 | 6.74E+05 | 5.14E+05 | 9.39E+05 | 4.13E+05 | 3.57E+05 | 5.40E+05 | 4.96E+05 | 5.62E+05 |
| 1.82E+05 | 1.47E+05 | 1.50E+05 | 1.79E+05 | 1.65E+05 | 1.26E+05 | 2.18E+05 | 2.26E+05 | 1.95E+05 |
| 1.51E+06 | 1.61E+06 | 1.70E+06 | 1.80E+06 | 1.37E+06 | 7.91E+05 | 1.01E+06 | 1.06E+06 | 1.04E+06 |
| 2.39E+06 | 2.51E+06 | 3.47E+06 | 3.09E+06 | 3.46E+06 | 2.11E+06 | 2.07E+06 | 2.04E+06 | 2.17E+06 |
| 3.19E+05 | 4.41E+05 | 8.44E+05 | 6.18E+05 | 5.12E+05 | 6.72E+05 | 4.59E+05 | 4.28E+05 | 3.53E+05 |
| 1.44E+06 | 1.58E+06 | 1.95E+06 | 2.06E+06 | 2.04E+06 | 1.24E+06 | 1.14E+06 | 1.16E+06 | 1.10E+06 |
| 3.08E+05 | 2.91E+05 | 2.97E+05 | 3.11E+05 | 1.92E+05 | 2.66E+05 | 8.07E+05 | 6.97E+05 | 8.25E+05 |
| 4.27E+05 | 4.39E+05 | 4.39E+05 | 5.12E+05 | 4.20E+05 | 4.46E+05 | 5.41E+05 | 5.54E+05 | 4.01E+05 |
| 2.27E+05 | 2.41E+05 | 2.22E+05 | 2.50E+05 | 2.04E+05 | 1.85E+05 | 1.67E+05 | 1.60E+05 | 1.69E+05 |
| 3.27E+06 | 3.69E+06 | 3.29E+06 | 3.40E+06 | 3.75E+06 | 3.00E+06 | 4.16E+06 | 3.89E+06 | 4.20E+06 |
| 6.46E+04 | 6.56E+04 | 1.56E+04 | 7.45E+04 | 7.60E+04 | 4.57E+04 | 3.91E+04 | 2.35E+04 | 4.44E+04 |
| 1.99E+05 | 2.03E+05 | 1.49E+05 | 2.00E+05 | 1.65E+05 | 1.29E+05 | 1.33E+05 | 1.55E+05 | 1.69E+05 |
| 8.88E+05 | 8.54E+05 | 8.80E+05 | 8.54E+05 | 9.91E+05 | 7.14E+05 | 9.70E+05 | 1.09E+06 | 1.09E+06 |
| 1.35E+05 | 1.28E+05 | 1.53E+05 | 1.17E+05 | 7.63E+04 | 1.27E+05 | 2.68E+05 | 1.07E+05 | 2.73E+05 |
| 1.55E+05 | 1.58E+05 | 1.98E+05 | 1.29E+05 | 8.63E+04 | 1.97E+05 | 1.44E+05 | 1.31E+05 | 1.29E+05 |
| 2.99E+05 | 3.19E+05 | 4.51E+05 | 3.61E+05 | 3.09E+05 | 2.58E+05 | 2.71E+05 | 1.92E+05 | 2.47E+05 |
| 7.65E+04 | 6.18E+04 | 7.18E+04 | 7.80E+04 | 7.35E+04 | 1.64E+04 | 2.40E+06 | 2.48E+06 | 2.46E+06 |
| 2.61E+04 | 1.40E+04 | 1.40E+04 | 1.55E+04 | 1.33E+04 | 1.66E+04 | 1.86E+04 | 1.58E+04 | 1.75E+04 |
| 3.18E+07 | 3.24E+07 | 3.09E+07 | 3.77E+07 | 4.10E+07 | 2.68E+07 | 3.05E+07 | 2.80E+07 | 3.18E+07 |
| 7.62E+05 | 7.02E+05 | 7.50E+05 | 8.01E+05 | 8.16E+05 | 4.88E+05 | 6.03E+05 | 6.13E+05 | 6.39E+05 |
| 4.90E+06 | 4.27E+06 | 3.24E+06 | 4.28E+06 | 4.75E+06 | 2.78E+06 | 2.94E+06 | 3.40E+06 | 3.05E+06 |
| 1.14E+04 | 1.05E+04 | 1.23E+04 | 1.26E+04 | 1.24E+04 | 1.12E+04 | 1.31E+05 | 1.26E+05 | 1.24E+05 |
| 1.18E+06 | 1.14E+06 | 1.15E+06 | 1.07E+06 | 1.49E+06 | 1.16E+06 | 1.97E+07 | 1.82E+07 | 1.80E+07 |
| 3.71E+06 | 3.15E+06 | 2.84E+06 | 3.08E+06 | 3.62E+06 | 1.90E+06 | 2.71E+06 | 2.50E+06 | 2.75E+06 |
| 5.15E+04 | 5.42E+04 | 6.07E+04 | 5.85E+04 | 9.68E+04 | 6.10E+04 | 8.45E+04 | 5.74E+04 | 8.49E+04 |
| 3.56E+05 | 3.08E+05 | 4.36E+05 | 5.19E+05 | 2.27E+05 | 2.55E+05 | 5.18E+05 | 5.14E+05 | 5.12E+05 |
| 1.40E+04 | 9.00E+00 | 9.00E+00 | 9.00E+00 | 9.00E+00 | 7.54E+03 | 6.15E+04 | 9.04E+04 | 6.50E+04 |
| 5.23E+06 | 4.58E+06 | 4.79E+06 | 5.02E+06 | 4.54E+06 | 3.90E+06 | 2.71E+07 | 2.49E+07 | 2.42E+07 |
| 5.63E+06 | 4.22E+06 | 7.12E+06 | 4.86E+06 | 2.88E+06 | 4.52E+06 | 2.25E+07 | 2.25E+07 | 2.21E+07 |

|          |          |          |          |          |          |          |          |          |
|----------|----------|----------|----------|----------|----------|----------|----------|----------|
| 1.45E+07 | 1.56E+07 | 1.64E+07 | 1.74E+07 | 1.53E+07 | 1.40E+07 | 1.57E+07 | 1.52E+07 | 1.60E+07 |
| 1.37E+05 | 9.55E+04 | 1.66E+05 | 1.10E+05 | 8.86E+04 | 7.81E+04 | 4.63E+04 | 5.03E+04 | 4.17E+04 |
| 3.88E+06 | 4.11E+06 | 4.35E+06 | 4.34E+06 | 3.92E+06 | 3.49E+06 | 4.06E+06 | 3.71E+06 | 3.78E+06 |
| 2.06E+06 | 1.66E+06 | 2.58E+06 | 2.10E+06 | 2.44E+06 | 1.92E+06 | 3.45E+06 | 3.41E+06 | 2.93E+06 |
| 3.93E+04 | 3.81E+04 | 4.77E+04 | 3.61E+04 | 4.69E+04 | 4.08E+04 | 1.41E+05 | 1.37E+05 | 1.36E+05 |
| 6.69E+05 | 6.12E+05 | 5.54E+05 | 4.99E+05 | 3.63E+05 | 4.27E+05 | 6.96E+05 | 5.27E+05 | 6.05E+05 |
| 1.41E+04 | 1.32E+04 | 1.34E+04 | 1.12E+04 | 1.15E+04 | 1.19E+04 | 6.05E+04 | 5.93E+04 | 5.42E+04 |
| 2.31E+07 | 2.38E+07 | 2.23E+07 | 2.86E+07 | 2.59E+07 | 2.07E+07 | 2.61E+07 | 2.59E+07 | 2.56E+07 |
| 2.73E+06 | 2.49E+06 | 5.50E+06 | 3.36E+06 | 4.42E+06 | 4.01E+06 | 4.85E+06 | 4.62E+06 | 4.08E+06 |
| 2.10E+05 | 2.09E+05 | 2.53E+05 | 2.72E+05 | 3.41E+05 | 3.00E+05 | 4.04E+05 | 3.51E+05 | 3.77E+05 |
| 1.57E+05 | 1.86E+05 | 1.96E+05 | 1.84E+05 | 1.89E+04 | 1.79E+05 | 1.96E+05 | 1.77E+05 | 1.72E+05 |
| 3.68E+05 | 3.83E+05 | 4.88E+05 | 4.30E+05 | 4.34E+05 | 2.96E+05 | 3.50E+05 | 3.22E+05 | 3.33E+05 |
| 1.88E+06 | 1.21E+06 | 1.12E+06 | 1.51E+06 | 1.35E+06 | 9.25E+05 | 1.14E+06 | 9.70E+05 | 9.73E+05 |
| 4.99E+04 | 4.13E+04 | 5.55E+04 | 6.81E+04 | 4.47E+04 | 3.65E+04 | 3.89E+04 | 4.04E+04 | 3.68E+04 |
| 5.51E+05 | 3.79E+05 | 6.05E+05 | 6.68E+05 | 5.09E+05 | 4.91E+05 | 3.68E+05 | 4.20E+05 | 4.74E+05 |
| 8.80E+03 | 1.00E+04 | 9.00E+00 | 1.86E+04 | 1.47E+04 | 1.16E+04 | 1.29E+04 | 8.76E+03 | 7.58E+03 |
| 3.38E+05 | 4.34E+05 | 1.16E+05 | 4.55E+05 | 3.92E+05 | 4.46E+05 | 4.45E+05 | 4.42E+05 | 4.75E+05 |
| 9.43E+05 | 8.97E+05 | 8.09E+05 | 9.13E+05 | 7.13E+05 | 1.14E+06 | 9.21E+05 | 9.35E+05 | 9.26E+05 |
| 3.56E+05 | 3.21E+05 | 2.86E+05 | 3.41E+05 | 3.20E+05 | 3.52E+05 | 3.65E+05 | 3.56E+05 | 3.94E+05 |
| 1.01E+05 | 1.30E+05 | 1.11E+05 | 1.26E+05 | 9.01E+04 | 1.02E+05 | 1.41E+05 | 1.32E+05 | 1.46E+05 |
| 2.92E+05 | 3.08E+05 | 2.28E+05 | 3.09E+05 | 2.09E+05 | 2.46E+05 | 6.23E+05 | 5.86E+05 | 6.67E+05 |
| 3.31E+05 | 3.02E+05 | 2.72E+05 | 2.96E+05 | 3.01E+05 | 2.71E+05 | 1.37E+06 | 1.39E+06 | 1.38E+06 |
| 3.28E+05 | 3.28E+05 | 3.66E+05 | 3.43E+05 | 2.49E+05 | 2.96E+05 | 1.64E+06 | 1.58E+06 | 1.68E+06 |
| 4.01E+05 | 4.26E+05 | 4.48E+05 | 4.99E+05 | 4.72E+05 | 4.23E+05 | 4.41E+05 | 4.36E+05 | 4.25E+05 |
| 3.20E+05 | 3.15E+05 | 4.00E+05 | 3.62E+05 | 3.38E+05 | 3.45E+05 | 5.19E+05 | 4.53E+05 | 4.03E+05 |
| 3.46E+05 | 4.36E+05 | 3.32E+05 | 5.16E+05 | 1.73E+05 | 3.02E+05 | 2.60E+05 | 2.33E+05 | 2.08E+05 |
| 6.26E+05 | 6.92E+05 | 5.33E+05 | 7.50E+05 | 5.45E+05 | 5.66E+05 | 7.41E+05 | 7.25E+05 | 7.21E+05 |
| 4.32E+05 | 4.30E+05 | 5.15E+05 | 2.12E+05 | 5.10E+05 | 2.84E+05 | 3.38E+05 | 4.58E+05 | 5.39E+05 |
| 1.85E+05 | 2.05E+05 | 2.02E+05 | 1.97E+05 | 2.11E+05 | 2.97E+05 | 2.08E+05 | 2.23E+05 | 1.28E+05 |
| 7.18E+05 | 6.96E+05 | 7.06E+05 | 7.50E+05 | 7.66E+05 | 6.10E+05 | 1.04E+06 | 9.78E+05 | 8.26E+05 |
| 3.01E+04 | 1.47E+04 | 9.00E+00 | 9.00E+00 | 3.36E+04 | 1.58E+04 | 3.88E+04 | 1.35E+04 | 2.83E+04 |
| 1.34E+05 | 1.21E+05 | 1.39E+05 | 6.33E+04 | 1.18E+05 | 4.87E+04 | 1.13E+05 | 9.54E+04 | 1.07E+05 |
| 1.05E+05 | 1.40E+05 | 8.85E+04 | 6.79E+04 | 8.70E+04 | 5.01E+04 | 9.36E+05 | 9.89E+05 | 5.63E+05 |
| 2.64E+06 | 2.68E+06 | 2.03E+06 | 2.54E+06 | 2.85E+06 | 2.18E+06 | 2.22E+06 | 2.10E+06 | 2.15E+06 |
| 1.90E+05 | 1.12E+05 | 2.49E+05 | 2.84E+05 | 2.96E+05 | 2.44E+05 | 2.69E+05 | 2.54E+05 | 2.08E+05 |
| 3.78E+04 | 2.98E+04 | 3.14E+04 | 4.05E+04 | 3.17E+04 | 2.43E+04 | 2.45E+04 | 1.91E+04 | 2.21E+04 |
| 4.24E+07 | 4.47E+07 | 4.54E+07 | 4.40E+07 | 6.18E+07 | 4.02E+07 | 8.47E+07 | 7.35E+07 | 7.90E+07 |
| 1.03E+06 | 9.89E+05 | 1.52E+06 | 9.21E+05 | 1.32E+06 | 1.04E+06 | 1.05E+06 | 9.59E+05 | 9.78E+05 |
| 2.42E+05 | 2.78E+05 | 2.84E+05 | 2.83E+05 | 2.77E+05 | 2.90E+05 | 1.42E+06 | 1.59E+06 | 1.57E+06 |
| 3.38E+05 | 4.17E+05 | 5.01E+05 | 3.78E+05 | 4.03E+05 | 2.93E+05 | 1.12E+06 | 1.07E+06 | 1.15E+06 |
| 1.52E+05 | 1.38E+05 | 1.12E+05 | 1.72E+05 | 1.52E+05 | 7.19E+04 | 1.00E+05 | 1.08E+05 | 9.63E+04 |
| 3.85E+06 | 3.21E+06 | 2.68E+06 | 3.71E+06 | 3.41E+06 | 2.78E+06 | 2.48E+06 | 2.40E+06 | 2.84E+06 |
| 1.12E+05 | 1.44E+05 | 1.22E+05 | 1.71E+05 | 1.70E+05 | 1.05E+05 | 1.30E+05 | 1.26E+05 | 1.43E+05 |
| 4.21E+03 | 3.62E+03 | 3.41E+03 | 2.77E+03 | 3.40E+03 | 2.68E+03 | 1.44E+04 | 1.53E+04 | 1.54E+04 |
| 3.18E+03 | 3.96E+03 | 3.05E+03 | 4.18E+03 | 3.70E+03 | 3.24E+03 | 6.17E+03 | 7.27E+03 | 5.87E+03 |
| 6.63E+03 | 1.10E+03 | 7.46E+03 | 6.23E+03 | 7.09E+03 | 7.11E+03 | 6.94E+04 | 7.34E+04 | 7.82E+04 |
| 9.00E+00 | 9.00E+00 | 9.00E+00 | 9.00E+00 | 9.00E+00 | 9.00E+00 | 5.32E+04 | 2.26E+04 | 3.58E+04 |
| 1.49E+05 | 1.75E+05 | 1.76E+05 | 1.81E+05 | 1.49E+05 | 1.46E+05 | 1.13E+06 | 9.42E+05 | 9.90E+05 |
| 5.50E+07 | 6.72E+07 | 2.92E+07 | 2.87E+07 | 4.61E+07 | 4.97E+07 | 4.71E+07 | 4.93E+07 | 4.82E+07 |
| 7.50E+07 | 6.61E+07 | 6.26E+07 | 7.37E+07 | 7.78E+07 | 5.72E+07 | 1.34E+08 | 1.28E+08 | 1.28E+08 |
| 1.40E+07 | 1.29E+07 | 1.60E+07 | 1.31E+07 | 1.45E+07 | 3.76E+06 | 1.29E+07 | 1.08E+07 | 1.15E+07 |
| 1.09E+06 | 1.07E+06 | 1.48E+06 | 1.35E+06 | 1.62E+06 | 1.32E+06 | 1.14E+06 | 1.16E+06 | 1.05E+06 |
| 9.00E+00 | 9.00E+00 | 9.00E+00 | 9.00E+00 | 9.00E+00 | 9.00E+00 | 1.90E+05 | 1.74E+05 | 1.72E+05 |
| 3.85E+05 | 4.40E+05 | 3.77E+05 | 4.29E+05 | 3.95E+05 | 3.75E+05 | 4.90E+05 | 4.57E+05 | 4.60E+05 |

|          |          |          |          |          |          |          |          |          |
|----------|----------|----------|----------|----------|----------|----------|----------|----------|
| 1.55E+04 | 1.39E+04 | 1.29E+04 | 1.09E+04 | 1.40E+04 | 1.65E+04 | 4.27E+04 | 4.12E+04 | 4.06E+04 |
| 6.70E+03 | 7.19E+03 | 7.00E+03 | 6.60E+03 | 7.39E+03 | 6.65E+03 | 9.11E+03 | 8.98E+03 | 7.22E+03 |
| 9.00E+00 | 9.00E+00 | 9.00E+00 | 9.00E+00 | 1.95E+04 | 2.03E+04 | 2.77E+05 | 2.49E+05 | 2.83E+05 |
| 9.00E+00 | 9.00E+00 | 8.51E+03 | 9.00E+00 | 9.00E+00 | 6.52E+03 | 5.86E+04 | 6.74E+04 | 7.40E+04 |
| 5.94E+04 | 7.33E+04 | 8.17E+04 | 6.68E+04 | 5.82E+04 | 5.05E+04 | 1.73E+06 | 1.70E+06 | 1.59E+06 |
| 8.20E+04 | 9.82E+04 | 1.10E+05 | 8.60E+04 | 9.59E+04 | 1.03E+05 | 1.02E+05 | 8.52E+04 | 1.02E+05 |
| 9.00E+00 | 9.00E+00 | 9.00E+00 | 1.84E+03 | 9.00E+00 | 9.00E+00 | 2.30E+04 | 1.99E+04 | 2.14E+04 |
| 9.00E+00 | 9.00E+00 | 9.00E+00 | 9.00E+00 | 9.00E+00 | 9.00E+00 | 4.79E+04 | 5.49E+04 | 4.16E+04 |
| 7.83E+05 | 7.77E+05 | 8.86E+05 | 8.75E+05 | 2.58E+05 | 5.64E+05 | 3.96E+06 | 3.98E+06 | 4.02E+06 |
| 9.00E+00 | 9.00E+00 | 9.00E+00 | 9.00E+00 | 9.00E+00 | 1.47E+04 | 2.61E+04 | 2.42E+04 | 2.07E+04 |
| 9.30E+03 | 8.49E+03 | 1.37E+04 | 1.03E+04 | 9.24E+03 | 7.88E+03 | 5.20E+04 | 4.68E+04 | 4.90E+04 |
| 2.38E+05 | 2.40E+05 | 3.07E+05 | 2.39E+05 | 2.41E+05 | 2.00E+05 | 2.60E+06 | 2.74E+06 | 2.53E+06 |
| 2.53E+05 | 2.20E+05 | 2.71E+05 | 2.38E+05 | 2.51E+05 | 4.28E+04 | 4.68E+06 | 4.67E+06 | 4.24E+06 |
| 5.01E+04 | 6.40E+04 | 6.97E+04 | 6.19E+04 | 5.16E+04 | 5.55E+04 | 1.56E+06 | 1.52E+06 | 1.46E+06 |
| 3.70E+04 | 4.77E+04 | 4.84E+04 | 4.93E+04 | 4.00E+04 | 3.82E+04 | 6.82E+05 | 7.76E+05 | 7.66E+05 |
| 4.15E+05 | 4.85E+05 | 5.45E+05 | 4.53E+05 | 4.01E+05 | 3.94E+05 | 1.44E+07 | 1.31E+07 | 1.44E+07 |
| 5.57E+04 | 6.19E+04 | 6.06E+04 | 5.48E+04 | 5.50E+04 | 5.98E+04 | 4.85E+06 | 4.92E+06 | 4.73E+06 |
| 3.07E+05 | 3.26E+05 | 3.29E+05 | 3.63E+05 | 4.39E+05 | 3.15E+05 | 2.00E+06 | 2.04E+06 | 2.00E+06 |
| 1.00E+07 | 1.23E+07 | 1.25E+07 | 1.11E+07 | 1.11E+07 | 8.60E+06 | 3.60E+07 | 3.43E+07 | 3.68E+07 |
| 1.01E+05 | 7.72E+04 | 1.11E+05 | 1.14E+05 | 1.65E+05 | 7.55E+04 | 1.54E+05 | 1.61E+05 | 1.43E+05 |
| 9.00E+00 | 9.00E+00 | 9.00E+00 | 9.00E+00 | 9.00E+00 | 9.00E+00 | 3.09E+04 | 2.99E+04 | 3.11E+04 |
| 7.08E+03 | 1.00E+04 | 1.01E+04 | 9.42E+03 | 1.04E+04 | 6.58E+03 | 3.93E+05 | 3.77E+05 | 3.77E+05 |
| 2.67E+06 | 2.34E+06 | 2.61E+06 | 2.90E+06 | 3.21E+06 | 2.22E+06 | 5.81E+06 | 4.75E+06 | 5.12E+06 |
| 1.72E+06 | 1.93E+06 | 1.97E+06 | 2.08E+06 | 1.94E+06 | 1.87E+06 | 2.89E+07 | 2.94E+07 | 2.89E+07 |
| 4.65E+04 | 4.45E+04 | 4.86E+04 | 4.38E+04 | 4.63E+04 | 3.83E+04 | 1.03E+06 | 1.00E+06 | 1.05E+06 |
| 1.14E+04 | 1.82E+04 | 1.42E+04 | 9.00E+00 | 1.44E+04 | 1.02E+04 | 3.83E+04 | 2.42E+04 | 3.93E+04 |
| 9.00E+00 | 9.00E+00 | 2.04E+04 | 9.00E+00 | 9.00E+00 | 9.00E+00 | 7.35E+05 | 7.58E+05 | 7.76E+05 |
| 9.00E+00 | 9.00E+00 | 9.00E+00 | 9.00E+00 | 9.00E+00 | 9.00E+00 | 4.58E+04 | 4.13E+04 | 5.02E+04 |
| 1.18E+05 | 4.83E+05 | 5.18E+05 | 4.98E+05 | 8.09E+04 | 4.70E+05 | 1.14E+06 | 1.09E+06 | 1.08E+06 |
| 4.71E+04 | 4.89E+04 | 5.28E+04 | 4.78E+04 | 5.06E+04 | 4.94E+04 | 1.34E+06 | 1.29E+06 | 1.34E+06 |
| 1.90E+05 | 1.45E+05 | 1.09E+05 | 1.47E+05 | 9.62E+04 | 4.73E+04 | 1.92E+06 | 2.11E+06 | 1.91E+06 |
| 9.00E+00 | 9.00E+00 | 9.00E+00 | 9.00E+00 | 9.00E+00 | 9.00E+00 | 1.32E+05 | 1.33E+05 | 1.15E+05 |
| 1.11E+04 | 1.46E+04 | 1.92E+04 | 8.29E+03 | 9.00E+00 | 7.32E+03 | 5.11E+04 | 3.00E+04 | 4.38E+04 |
| 4.44E+04 | 4.12E+04 | 5.93E+04 | 4.76E+04 | 3.69E+04 | 4.34E+04 | 3.96E+05 | 3.72E+05 | 3.99E+05 |
| 5.53E+04 | 4.32E+04 | 8.63E+04 | 2.65E+04 | 4.80E+04 | 3.96E+04 | 5.11E+05 | 5.13E+05 | 5.14E+05 |
| 3.92E+05 | 4.55E+05 | 5.28E+05 | 4.66E+05 | 4.93E+05 | 5.00E+05 | 4.47E+06 | 4.59E+06 | 4.81E+06 |
| 1.23E+05 | 1.26E+05 | 1.39E+05 | 1.25E+05 | 1.33E+05 | 1.21E+05 | 1.88E+06 | 1.86E+06 | 1.87E+06 |
| 3.15E+05 | 2.54E+05 | 3.23E+05 | 2.43E+05 | 3.16E+05 | 3.03E+05 | 1.83E+06 | 1.92E+06 | 1.54E+06 |
| 6.78E+03 | 6.83E+03 | 7.64E+03 | 7.30E+03 | 7.26E+03 | 6.83E+03 | 1.03E+05 | 8.94E+04 | 1.02E+05 |
| 2.26E+05 | 2.55E+05 | 2.71E+05 | 2.23E+05 | 2.53E+05 | 2.36E+05 | 2.44E+07 | 2.25E+07 | 2.38E+07 |
| 7.93E+05 | 7.51E+05 | 8.48E+05 | 9.08E+05 | 8.17E+05 | 9.37E+05 | 1.95E+06 | 2.04E+06 | 2.05E+06 |
| 9.66E+04 | 8.87E+04 | 1.00E+05 | 8.51E+04 | 7.39E+04 | 1.22E+05 | 9.21E+06 | 9.31E+06 | 9.33E+06 |
| 1.28E+05 | 1.13E+05 | 1.47E+05 | 1.34E+05 | 1.41E+05 | 1.32E+05 | 1.34E+06 | 1.22E+06 | 1.24E+06 |
| 2.35E+06 | 4.48E+06 | 5.37E+06 | 4.55E+06 | 5.51E+06 | 4.53E+06 | 5.23E+07 | 5.53E+07 | 2.71E+07 |
| 9.00E+00 | 9.00E+00 | 9.00E+00 | 9.00E+00 | 9.00E+00 | 9.00E+00 | 6.93E+04 | 6.47E+04 | 4.03E+04 |
| 1.16E+03 | 9.00E+00 | 9.00E+00 | 9.00E+00 | 1.04E+03 | 9.00E+00 | 7.71E+04 | 7.28E+04 | 7.40E+04 |
| 5.40E+03 | 7.81E+03 | 8.27E+03 | 7.34E+03 | 6.82E+03 | 7.13E+03 | 7.61E+05 | 7.88E+05 | 7.86E+05 |
| 3.42E+03 | 6.31E+03 | 7.73E+03 | 4.45E+03 | 5.09E+03 | 5.25E+03 | 2.84E+05 | 2.55E+05 | 3.10E+05 |
| 5.33E+05 | 5.83E+05 | 6.79E+05 | 5.79E+05 | 6.48E+05 | 5.56E+05 | 2.77E+07 | 2.73E+07 | 2.60E+07 |
| 5.59E+05 | 5.89E+05 | 7.09E+05 | 7.03E+05 | 7.45E+05 | 6.27E+05 | 2.51E+06 | 2.82E+06 | 2.55E+06 |
| 2.00E+06 | 1.82E+06 | 1.80E+06 | 2.07E+06 | 2.20E+06 | 1.94E+06 | 5.84E+07 | 6.18E+07 | 6.19E+07 |
| 2.75E+04 | 3.08E+04 | 2.93E+04 | 2.81E+04 | 3.12E+04 | 1.06E+04 | 1.49E+06 | 1.40E+06 | 1.29E+06 |
| 1.61E+04 | 1.64E+04 | 1.96E+04 | 1.68E+04 | 1.80E+04 | 1.48E+04 | 4.61E+05 | 4.26E+05 | 4.17E+05 |
| 1.68E+05 | 2.22E+05 | 2.10E+05 | 1.65E+05 | 1.71E+05 | 1.49E+05 | 4.51E+07 | 3.65E+07 | 4.52E+07 |

|          |          |          |          |          |          |          |          |          |
|----------|----------|----------|----------|----------|----------|----------|----------|----------|
| 1.79E+05 | 2.00E+05 | 2.27E+05 | 2.08E+05 | 1.79E+05 | 1.47E+05 | 1.15E+06 | 1.32E+06 | 1.30E+06 |
| 9.00E+00 | 9.00E+00 | 9.00E+00 | 9.00E+00 | 9.00E+00 | 9.00E+00 | 2.73E+05 | 2.66E+05 | 2.72E+05 |
| 1.71E+04 | 3.48E+04 | 2.58E+04 | 1.86E+04 | 2.93E+04 | 2.04E+04 | 1.29E+07 | 1.31E+07 | 1.23E+07 |
| 1.21E+04 | 1.42E+04 | 1.24E+04 | 1.13E+04 | 1.40E+04 | 1.22E+04 | 2.49E+06 | 2.46E+06 | 2.17E+06 |
| 3.28E+06 | 2.76E+06 | 3.48E+06 | 3.22E+06 | 3.36E+06 | 2.72E+06 | 5.40E+07 | 4.87E+07 | 4.98E+07 |
| 2.08E+04 | 3.48E+04 | 2.60E+04 | 1.94E+04 | 2.40E+04 | 1.25E+04 | 1.75E+05 | 1.40E+05 | 1.19E+05 |
| 2.92E+03 | 6.26E+03 | 4.23E+03 | 3.82E+03 | 4.89E+03 | 5.41E+03 | 1.78E+06 | 1.99E+06 | 1.95E+06 |
| 6.93E+05 | 6.46E+05 | 6.10E+05 | 6.78E+05 | 7.56E+05 | 5.43E+05 | 2.47E+06 | 2.43E+06 | 2.79E+06 |
| 6.34E+05 | 5.71E+05 | 5.93E+05 | 6.44E+05 | 6.29E+05 | 5.22E+05 | 1.48E+07 | 1.36E+07 | 1.60E+07 |
| 9.00E+00 | 6.48E+02 | 9.00E+00 | 9.00E+00 | 8.89E+02 | 9.00E+00 | 1.28E+05 | 1.31E+05 | 1.24E+05 |
| 7.04E+02 | 1.03E+03 | 5.76E+02 | 9.43E+02 | 6.60E+02 | 9.00E+00 | 9.20E+04 | 9.14E+04 | 8.75E+04 |
| 1.22E+04 | 3.55E+04 | 4.49E+04 | 3.86E+04 | 4.03E+04 | 2.34E+04 | 1.13E+06 | 1.10E+06 | 1.05E+06 |
| 1.63E+05 | 1.40E+05 | 1.66E+05 | 1.51E+05 | 1.27E+05 | 1.27E+05 | 5.63E+05 | 5.10E+05 | 6.17E+05 |
| 8.24E+04 | 9.00E+00 | 9.00E+00 | 9.00E+00 | 9.00E+00 | 9.00E+00 | 2.76E+05 | 2.79E+05 | 2.59E+05 |
| 4.01E+04 | 3.27E+04 | 5.51E+04 | 4.08E+04 | 3.06E+04 | 5.06E+04 | 7.90E+04 | 6.21E+04 | 6.72E+04 |
| 7.17E+04 | 5.68E+04 | 8.37E+04 | 6.78E+04 | 5.62E+04 | 6.72E+04 | 1.36E+05 | 1.24E+05 | 1.19E+05 |
| 2.43E+05 | 2.11E+05 | 3.28E+05 | 2.48E+05 | 2.29E+05 | 2.37E+05 | 1.31E+05 | 1.25E+05 | 1.23E+05 |
| 1.88E+05 | 1.86E+05 | 2.20E+05 | 1.80E+05 | 2.00E+05 | 1.84E+05 | 1.65E+05 | 1.76E+05 | 1.77E+05 |
| 2.27E+04 | 2.47E+04 | 3.64E+04 | 2.19E+04 | 2.19E+04 | 2.36E+04 | 6.23E+04 | 6.52E+04 | 6.25E+04 |
| 1.86E+05 | 1.59E+05 | 1.88E+05 | 1.72E+05 | 1.95E+05 | 1.61E+05 | 1.36E+05 | 1.30E+05 | 1.28E+05 |
| 5.76E+04 | 3.61E+04 | 6.36E+04 | 6.05E+04 | 4.28E+04 | 4.94E+04 | 8.41E+05 | 7.92E+05 | 7.99E+05 |
| 1.96E+05 | 1.65E+05 | 2.14E+05 | 2.35E+05 | 1.52E+05 | 2.20E+05 | 1.35E+05 | 1.32E+05 | 1.42E+05 |
| 2.54E+04 | 2.10E+04 | 2.61E+04 | 2.93E+04 | 1.24E+04 | 3.43E+04 | 2.36E+05 | 2.58E+05 | 2.44E+05 |
| 2.79E+04 | 2.79E+04 | 2.43E+04 | 3.20E+04 | 2.93E+04 | 2.39E+04 | 2.08E+04 | 2.14E+04 | 2.05E+04 |
| 3.60E+04 | 3.65E+04 | 5.35E+04 | 4.47E+04 | 4.13E+04 | 4.02E+04 | 4.21E+05 | 4.28E+05 | 4.17E+05 |
| 3.98E+04 | 4.23E+04 | 4.72E+04 | 4.83E+04 | 5.32E+04 | 4.10E+04 | 5.26E+04 | 3.55E+04 | 4.61E+04 |
| 6.39E+05 | 5.86E+05 | 6.54E+05 | 7.24E+05 | 6.33E+05 | 6.55E+05 | 6.79E+05 | 6.40E+05 | 6.43E+05 |
| 5.33E+04 | 5.93E+04 | 7.13E+04 | 6.49E+04 | 5.14E+04 | 4.78E+04 | 1.96E+05 | 2.48E+05 | 2.36E+05 |
| 1.20E+05 | 1.11E+05 | 8.48E+04 | 1.26E+05 | 1.40E+05 | 1.09E+05 | 3.26E+05 | 3.46E+05 | 3.89E+05 |
| 7.07E+04 | 1.05E+05 | 9.29E+04 | 1.61E+05 | 6.43E+04 | 4.61E+04 | 5.91E+05 | 6.50E+05 | 6.06E+05 |
| 3.19E+04 | 2.39E+04 | 3.50E+04 | 2.27E+04 | 3.50E+04 | 2.75E+04 | 1.76E+04 | 1.85E+04 | 2.36E+04 |
| 1.63E+04 | 1.54E+04 | 1.59E+04 | 1.42E+04 | 1.79E+04 | 1.15E+04 | 1.64E+04 | 1.49E+04 | 1.86E+04 |
| 1.06E+04 | 7.82E+03 | 6.71E+03 | 3.60E+03 | 5.39E+03 | 5.80E+03 | 4.04E+04 | 3.67E+04 | 3.88E+04 |
| 2.05E+04 | 2.97E+04 | 2.42E+04 | 3.20E+04 | 3.19E+04 | 1.97E+04 | 2.29E+04 | 1.88E+04 | 1.53E+04 |
| 6.20E+04 | 6.57E+04 | 6.60E+04 | 6.79E+04 | 7.36E+04 | 5.50E+04 | 8.07E+04 | 7.37E+04 | 8.05E+04 |
| 2.38E+03 | 2.03E+03 | 2.29E+03 | 2.32E+03 | 3.26E+03 | 1.48E+03 | 4.86E+04 | 5.56E+04 | 4.92E+04 |
| 9.00E+00 | 2.55E+03 | 9.00E+00 | 4.46E+03 | 9.00E+00 | 9.00E+00 | 5.32E+04 | 5.05E+04 | 5.06E+04 |
| 5.03E+04 | 4.28E+04 | 5.89E+04 | 5.70E+04 | 5.83E+04 | 4.82E+04 | 7.77E+04 | 7.23E+04 | 7.82E+04 |
| 1.54E+05 | 1.32E+05 | 1.28E+05 | 1.30E+05 | 1.56E+05 | 1.04E+05 | 1.67E+05 | 1.62E+05 | 1.17E+05 |
| 7.71E+04 | 7.52E+04 | 6.55E+04 | 8.74E+04 | 9.11E+04 | 7.31E+04 | 1.19E+05 | 1.13E+05 | 1.27E+05 |
| 1.14E+05 | 1.29E+05 | 1.39E+05 | 1.36E+05 | 1.12E+05 | 1.17E+05 | 4.86E+06 | 4.77E+06 | 4.68E+06 |
| 4.54E+04 | 3.72E+04 | 5.96E+04 | 1.00E+05 | 6.50E+04 | 5.61E+04 | 6.67E+05 | 7.64E+05 | 6.56E+05 |
| 9.00E+00 | 6.07E+03 | 2.27E+04 | 9.00E+00 | 9.00E+00 | 9.00E+00 | 8.92E+04 | 8.35E+04 | 8.26E+04 |
| 9.86E+05 | 1.12E+06 | 1.29E+06 | 1.12E+06 | 1.27E+06 | 8.43E+05 | 4.26E+07 | 4.37E+07 | 3.98E+07 |
| 7.34E+05 | 7.91E+05 | 8.03E+05 | 7.32E+05 | 9.03E+05 | 6.94E+05 | 9.75E+05 | 9.13E+05 | 1.05E+06 |
| 3.57E+04 | 4.15E+04 | 1.60E+04 | 2.49E+04 | 1.98E+04 | 4.82E+03 | 5.59E+04 | 5.79E+04 | 5.59E+04 |
| 4.45E+04 | 8.96E+04 | 1.38E+05 | 1.19E+05 | 1.34E+05 | 1.18E+05 | 1.31E+07 | 1.37E+07 | 1.24E+07 |
| 3.53E+04 | 5.85E+04 | 5.16E+04 | 5.11E+04 | 5.91E+04 | 4.40E+04 | 9.88E+05 | 1.06E+06 | 1.26E+06 |
| 5.94E+05 | 6.19E+05 | 6.10E+05 | 7.65E+05 | 6.88E+05 | 5.62E+05 | 3.80E+06 | 4.10E+06 | 3.77E+06 |
| 1.65E+07 | 1.95E+07 | 1.97E+07 | 1.75E+07 | 2.04E+07 | 1.76E+07 | 4.62E+07 | 4.34E+07 | 4.08E+07 |
| 3.71E+05 | 3.57E+05 | 2.44E+05 | 3.38E+05 | 3.93E+05 | 3.02E+05 | 7.14E+05 | 6.95E+05 | 7.20E+05 |
| 3.42E+03 | 9.00E+00 | 9.00E+00 | 9.00E+00 | 9.00E+00 | 9.00E+00 | 2.96E+04 | 3.25E+04 | 4.09E+04 |
| 1.62E+04 | 1.85E+04 | 1.91E+04 | 1.27E+04 | 1.85E+04 | 2.07E+04 | 7.81E+05 | 7.35E+05 | 6.69E+05 |
| 2.71E+04 | 1.46E+04 | 3.38E+04 | 2.61E+04 | 3.62E+04 | 2.87E+04 | 5.20E+05 | 4.92E+05 | 4.80E+05 |

|          |          |          |          |          |          |          |          |          |
|----------|----------|----------|----------|----------|----------|----------|----------|----------|
| 5.99E+06 | 6.00E+06 | 6.89E+06 | 6.35E+06 | 7.00E+06 | 5.46E+06 | 8.56E+07 | 7.84E+07 | 8.20E+07 |
| 4.39E+06 | 4.91E+06 | 4.49E+06 | 5.04E+06 | 5.69E+06 | 3.76E+06 | 5.36E+06 | 5.14E+06 | 5.10E+06 |
| 1.86E+07 | 1.82E+07 | 1.91E+07 | 2.02E+07 | 2.26E+07 | 1.85E+07 | 2.48E+08 | 2.31E+08 | 2.25E+08 |
| 9.00E+00 | 9.00E+00 | 9.00E+00 | 9.00E+00 | 3.32E+03 | 9.00E+00 | 4.78E+04 | 3.26E+04 | 5.40E+04 |
| 9.00E+00 | 6.35E+03 | 9.00E+00 | 9.00E+00 | 9.00E+00 | 9.00E+00 | 6.66E+04 | 6.64E+04 | 7.51E+04 |
| 4.64E+04 | 8.47E+04 | 5.71E+04 | 5.97E+04 | 1.12E+05 | 7.73E+04 | 2.73E+06 | 2.81E+06 | 2.74E+06 |
| 5.50E+03 | 1.09E+04 | 9.00E+00 | 1.86E+04 | 2.85E+04 | 1.40E+04 | 1.86E+05 | 2.30E+05 | 2.21E+05 |
| 5.81E+04 | 6.35E+04 | 5.38E+04 | 5.78E+04 | 6.15E+04 | 3.77E+04 | 1.72E+06 | 1.67E+06 | 1.69E+06 |
| 5.09E+04 | 5.11E+04 | 3.82E+04 | 7.20E+04 | 4.95E+04 | 4.29E+04 | 1.31E+05 | 1.29E+05 | 1.17E+05 |
| 4.47E+05 | 4.93E+05 | 5.71E+05 | 5.27E+05 | 5.81E+05 | 4.89E+05 | 6.57E+06 | 6.30E+06 | 5.66E+06 |
| 1.61E+04 | 1.54E+04 | 1.56E+04 | 1.87E+04 | 1.59E+04 | 8.59E+03 | 1.86E+06 | 1.29E+06 | 1.71E+06 |
| 9.00E+00 | 9.00E+00 | 9.00E+00 | 9.00E+00 | 9.00E+00 | 9.00E+00 | 4.87E+04 | 4.82E+04 | 4.55E+04 |
| 9.00E+00 | 9.00E+00 | 1.78E+04 | 9.00E+00 | 9.00E+00 | 1.48E+04 | 2.78E+05 | 2.57E+05 | 2.68E+05 |
| 3.00E+05 | 3.07E+05 | 2.74E+05 | 3.23E+05 | 3.24E+05 | 2.20E+05 | 4.49E+05 | 4.94E+05 | 4.94E+05 |
| 1.27E+05 | 1.69E+05 | 1.81E+05 | 1.44E+05 | 1.54E+05 | 1.57E+05 | 2.62E+06 | 2.63E+06 | 2.59E+06 |
| 2.02E+05 | 1.98E+05 | 1.98E+05 | 1.85E+05 | 2.64E+05 | 1.69E+05 | 3.29E+05 | 3.33E+05 | 3.11E+05 |
| 1.95E+05 | 2.58E+05 | 2.69E+05 | 2.53E+05 | 2.40E+05 | 2.62E+05 | 8.35E+05 | 8.64E+05 | 1.03E+06 |
| 7.57E+03 | 2.60E+04 | 2.77E+04 | 1.80E+04 | 1.47E+04 | 2.48E+04 | 2.06E+06 | 2.13E+06 | 1.99E+06 |
| 5.57E+05 | 5.77E+05 | 6.58E+05 | 5.43E+05 | 5.36E+05 | 5.37E+05 | 5.28E+07 | 5.31E+07 | 4.86E+07 |
| 2.32E+06 | 2.29E+06 | 2.37E+06 | 2.51E+06 | 2.28E+06 | 2.44E+06 | 2.89E+06 | 3.27E+06 | 3.07E+06 |
| 9.00E+00 | 9.00E+00 | 1.18E+04 | 9.00E+00 | 1.05E+04 | 9.00E+00 | 7.29E+05 | 6.79E+05 | 6.27E+05 |
| 1.24E+05 | 1.41E+05 | 1.58E+05 | 1.31E+05 | 1.29E+05 | 1.96E+05 | 1.47E+07 | 1.50E+07 | 1.49E+07 |
| 4.16E+05 | 4.40E+05 | 5.82E+05 | 4.87E+05 | 5.03E+05 | 4.51E+05 | 6.07E+06 | 5.39E+06 | 5.39E+06 |
| 1.01E+07 | 1.03E+07 | 1.21E+07 | 1.15E+07 | 1.23E+07 | 1.03E+07 | 1.27E+08 | 1.18E+08 | 1.17E+08 |
| 4.15E+05 | 4.86E+05 | 3.85E+05 | 4.62E+05 | 5.74E+05 | 3.76E+05 | 1.56E+06 | 1.34E+06 | 1.38E+06 |
| 9.11E+02 | 9.00E+02 | 9.00E+00 | 9.00E+00 | 9.29E+02 | 9.00E+00 | 5.52E+04 | 2.28E+04 | 3.50E+04 |
| 1.02E+04 | 6.66E+03 | 2.00E+04 | 1.59E+04 | 3.96E+03 | 1.90E+04 | 1.69E+06 | 1.85E+06 | 1.80E+06 |
| 3.49E+04 | 2.68E+04 | 4.09E+04 | 2.49E+04 | 3.18E+04 | 2.27E+04 | 6.60E+05 | 7.22E+05 | 7.04E+05 |
| 1.13E+06 | 1.30E+06 | 1.45E+06 | 1.09E+06 | 1.46E+06 | 1.08E+06 | 7.33E+07 | 7.42E+07 | 6.95E+07 |
| 2.02E+06 | 2.05E+06 | 2.19E+06 | 2.38E+06 | 2.63E+06 | 1.88E+06 | 8.16E+06 | 8.96E+06 | 7.28E+06 |
| 1.35E+07 | 1.12E+07 | 1.31E+07 | 1.18E+07 | 1.45E+07 | 1.33E+07 | 3.27E+08 | 3.20E+08 | 3.03E+08 |
| 9.00E+00 | 2.22E+03 | 4.44E+03 | 9.00E+00 | 9.00E+00 | 9.00E+00 | 1.19E+05 | 1.43E+05 | 1.09E+05 |
| 1.24E+04 | 8.86E+03 | 1.01E+04 | 7.03E+03 | 7.41E+03 | 2.36E+03 | 1.32E+05 | 1.11E+05 | 8.83E+04 |
| 9.00E+00 | 9.00E+00 | 1.73E+03 | 9.00E+00 | 4.60E+03 | 9.00E+00 | 7.53E+04 | 6.57E+04 | 7.29E+04 |
| 5.34E+04 | 6.24E+04 | 6.41E+04 | 5.08E+04 | 5.07E+04 | 5.16E+04 | 1.43E+06 | 1.45E+06 | 1.42E+06 |
| 1.83E+04 | 3.02E+04 | 1.80E+04 | 2.34E+04 | 4.04E+04 | 1.57E+04 | 1.95E+06 | 2.32E+06 | 2.02E+06 |
| 1.60E+03 | 9.00E+00 | 9.00E+00 | 9.00E+00 | 2.74E+03 | 9.00E+00 | 2.37E+05 | 3.12E+05 | 2.70E+05 |
| 9.00E+00 | 9.00E+00 | 1.75E+04 | 9.00E+00 | 1.76E+04 | 9.00E+00 | 1.91E+06 | 1.83E+06 | 1.69E+06 |
| 9.00E+00 | 9.00E+00 | 9.00E+00 | 9.00E+00 | 9.00E+00 | 9.00E+00 | 2.31E+05 | 2.61E+05 | 2.32E+05 |
| 3.72E+05 | 4.97E+05 | 5.60E+05 | 3.47E+05 | 4.13E+05 | 3.24E+05 | 1.04E+08 | 1.14E+08 | 1.04E+08 |
| 1.86E+05 | 1.76E+05 | 1.83E+05 | 1.94E+05 | 1.97E+05 | 1.44E+05 | 1.15E+06 | 1.05E+06 | 1.07E+06 |
| 6.10E+02 | 9.00E+00 | 9.00E+00 | 9.00E+00 | 9.00E+00 | 9.00E+00 | 6.15E+05 | 6.50E+05 | 6.71E+05 |
| 2.71E+04 | 9.00E+00 | 9.00E+00 | 9.00E+00 | 9.00E+00 | 9.00E+00 | 3.08E+06 | 3.27E+06 | 3.43E+06 |
| 4.18E+04 | 7.57E+04 | 6.98E+04 | 3.48E+04 | 1.35E+04 | 5.24E+04 | 2.89E+07 | 3.06E+07 | 2.78E+07 |
| 9.00E+00 | 9.00E+00 | 1.18E+04 | 9.00E+00 | 9.00E+00 | 9.00E+00 | 1.70E+06 | 4.47E+06 | 4.34E+06 |
| 1.40E+05 | 1.77E+05 | 9.62E+04 | 1.07E+05 | 2.12E+05 | 1.04E+05 | 5.27E+06 | 4.67E+06 | 5.15E+06 |
| 3.95E+06 | 4.29E+06 | 4.81E+06 | 3.83E+06 | 4.52E+06 | 3.79E+06 | 4.52E+07 | 4.67E+07 | 4.50E+07 |
| 9.55E+04 | 8.97E+04 | 6.05E+04 | 5.34E+04 | 7.78E+04 | 5.55E+04 | 6.24E+05 | 6.55E+05 | 7.05E+05 |
| 1.28E+03 | 9.00E+00 | 9.00E+00 | 9.00E+00 | 9.00E+00 | 9.00E+00 | 1.02E+05 | 7.94E+04 | 7.17E+04 |
| 2.36E+03 | 1.25E+04 | 5.96E+03 | 2.26E+03 | 1.53E+04 | 1.02E+04 | 3.02E+06 | 3.51E+06 | 3.16E+06 |
| 1.62E+04 | 1.21E+04 | 1.99E+04 | 1.37E+04 | 4.81E+03 | 1.28E+04 | 1.23E+06 | 1.30E+06 | 1.23E+06 |
| 1.28E+06 | 1.32E+06 | 1.55E+06 | 1.29E+06 | 1.58E+06 | 1.20E+06 | 7.09E+07 | 6.79E+07 | 6.82E+07 |
| 9.43E+05 | 1.00E+06 | 1.05E+06 | 9.60E+05 | 1.11E+06 | 7.39E+05 | 2.42E+06 | 2.39E+06 | 2.43E+06 |
| 5.80E+06 | 5.20E+06 | 5.67E+06 | 5.47E+06 | 6.09E+06 | 5.60E+06 | 1.34E+08 | 1.20E+08 | 1.16E+08 |

|          |          |          |          |          |          |          |          |          |
|----------|----------|----------|----------|----------|----------|----------|----------|----------|
| 3.04E+03 | 1.01E+03 | 9.00E+00 | 9.00E+00 | 9.00E+00 | 9.00E+00 | 1.83E+05 | 2.05E+05 | 1.83E+05 |
| 2.43E+04 | 1.88E+04 | 2.48E+04 | 1.96E+04 | 2.51E+04 | 2.48E+04 | 1.72E+06 | 1.81E+06 | 1.62E+06 |
| 3.79E+04 | 4.24E+04 | 3.69E+04 | 3.60E+04 | 2.55E+04 | 1.08E+04 | 8.20E+05 | 7.53E+05 | 7.60E+05 |
| 1.81E+03 | 9.00E+00 | 9.00E+00 | 9.00E+00 | 9.00E+00 | 9.00E+00 | 1.47E+04 | 2.46E+04 | 2.88E+04 |
| 3.15E+04 | 4.39E+04 | 5.36E+04 | 3.77E+04 | 4.43E+04 | 3.25E+04 | 8.99E+05 | 9.20E+05 | 9.64E+05 |
| 4.63E+04 | 3.40E+04 | 3.82E+04 | 1.24E+04 | 2.11E+04 | 2.09E+04 | 1.08E+05 | 1.00E+05 | 8.28E+04 |
| 2.03E+04 | 2.18E+04 | 1.26E+04 | 4.03E+04 | 3.59E+04 | 2.66E+04 | 1.53E+05 | 1.45E+05 | 1.75E+05 |
| 2.50E+05 | 2.78E+05 | 2.29E+05 | 2.69E+05 | 2.68E+05 | 2.61E+05 | 1.07E+06 | 1.10E+06 | 1.14E+06 |
| 2.28E+04 | 3.25E+04 | 9.58E+03 | 2.06E+04 | 2.63E+04 | 1.28E+04 | 4.81E+04 | 5.43E+04 | 7.64E+04 |
| 2.23E+04 | 1.62E+04 | 1.93E+04 | 1.98E+04 | 3.92E+04 | 2.78E+04 | 6.60E+04 | 4.98E+04 | 7.37E+04 |
| 3.59E+05 | 3.11E+05 | 3.54E+05 | 2.77E+05 | 3.90E+05 | 3.06E+05 | 2.10E+06 | 2.22E+06 | 2.28E+06 |
| 9.00E+00 | 9.00E+00 | 9.00E+00 | 9.00E+00 | 9.00E+00 | 9.00E+00 | 4.11E+04 | 1.42E+04 | 4.10E+04 |
| 1.75E+04 | 1.32E+04 | 7.78E+03 | 5.91E+03 | 1.37E+04 | 1.24E+04 | 5.78E+04 | 9.91E+04 | 1.04E+05 |
| 1.84E+04 | 1.50E+04 | 2.56E+04 | 2.16E+04 | 2.10E+04 | 3.23E+04 | 8.73E+04 | 6.45E+04 | 6.89E+04 |
| 9.00E+00 | 9.00E+00 | 9.00E+00 | 9.00E+00 | 4.01E+03 | 9.00E+00 | 7.26E+04 | 4.95E+04 | 6.14E+04 |
| 6.22E+04 | 7.30E+04 | 8.50E+04 | 6.77E+04 | 7.28E+04 | 8.08E+04 | 2.76E+05 | 2.75E+05 | 2.77E+05 |
| 7.32E+04 | 6.16E+04 | 6.80E+04 | 9.92E+04 | 6.37E+04 | 7.66E+04 | 1.20E+06 | 1.30E+06 | 1.36E+06 |
| 3.39E+04 | 1.80E+04 | 2.55E+04 | 4.01E+04 | 5.10E+04 | 3.34E+04 | 6.63E+04 | 8.61E+04 | 7.24E+04 |
| 9.60E+04 | 8.89E+04 | 1.06E+05 | 1.31E+05 | 9.58E+04 | 9.61E+04 | 1.49E+05 | 1.35E+05 | 1.39E+05 |
| 6.22E+04 | 3.89E+04 | 5.18E+04 | 5.21E+04 | 4.73E+04 | 4.64E+04 | 5.85E+04 | 5.67E+04 | 5.20E+04 |
| 9.00E+00 | 9.00E+00 | 9.00E+00 | 9.00E+00 | 9.00E+00 | 9.00E+00 | 6.40E+04 | 5.40E+04 | 5.64E+04 |
| 4.03E+05 | 3.87E+05 | 4.48E+05 | 4.39E+05 | 3.94E+05 | 4.01E+05 | 1.80E+06 | 1.60E+06 | 1.75E+06 |
| 1.67E+04 | 1.31E+04 | 2.32E+04 | 1.30E+04 | 7.06E+03 | 4.73E+03 | 1.67E+05 | 2.04E+05 | 1.62E+05 |
| 1.05E+05 | 9.55E+04 | 1.07E+05 | 1.28E+05 | 1.33E+05 | 9.51E+04 | 6.60E+05 | 6.33E+05 | 5.89E+05 |
| 9.00E+00 | 9.00E+00 | 9.00E+00 | 9.00E+00 | 9.00E+00 | 9.00E+00 | 5.45E+04 | 5.36E+04 | 5.04E+04 |
| 1.93E+04 | 1.95E+04 | 2.57E+04 | 1.65E+04 | 3.17E+04 | 1.71E+04 | 1.16E+05 | 1.41E+05 | 1.29E+05 |
| 1.95E+04 | 1.42E+04 | 1.43E+04 | 8.91E+03 | 9.33E+03 | 8.77E+03 | 1.22E+05 | 6.90E+04 | 9.56E+04 |
| 9.00E+00 | 9.00E+00 | 7.86E+02 | 9.00E+00 | 9.00E+00 | 9.00E+00 | 1.71E+04 | 1.42E+04 | 1.49E+04 |
| 4.38E+04 | 4.26E+04 | 5.05E+04 | 6.24E+04 | 4.54E+04 | 5.54E+04 | 4.52E+04 | 4.47E+04 | 3.87E+04 |
| 1.90E+05 | 1.83E+05 | 2.15E+05 | 1.97E+05 | 1.89E+05 | 1.94E+05 | 3.71E+05 | 3.74E+05 | 3.54E+05 |
| 2.07E+05 | 2.00E+05 | 2.16E+05 | 2.19E+05 | 2.18E+05 | 2.08E+05 | 3.23E+05 | 3.30E+05 | 3.35E+05 |
| 1.23E+05 | 1.17E+05 | 1.02E+05 | 6.81E+04 | 7.56E+04 | 1.17E+05 | 4.37E+04 | 7.58E+04 | 5.32E+04 |
| 9.00E+00 | 9.00E+00 | 9.00E+00 | 9.00E+00 | 9.00E+00 | 9.00E+00 | 8.92E+04 | 9.04E+04 | 9.99E+04 |
| 6.24E+05 | 5.26E+05 | 6.10E+05 | 5.35E+05 | 5.10E+05 | 7.16E+05 | 5.03E+05 | 4.94E+05 | 5.08E+05 |
| 1.12E+05 | 1.06E+05 | 8.94E+04 | 1.05E+05 | 1.02E+05 | 1.34E+05 | 8.90E+04 | 7.69E+04 | 7.92E+04 |
| 1.60E+04 | 1.77E+04 | 1.54E+04 | 1.61E+04 | 1.61E+04 | 1.65E+04 | 1.98E+04 | 1.67E+04 | 1.47E+04 |
| 4.54E+04 | 4.50E+04 | 3.55E+04 | 4.17E+04 | 4.38E+04 | 4.45E+04 | 6.30E+04 | 5.41E+04 | 5.69E+04 |
| 1.57E+06 | 1.48E+06 | 1.46E+06 | 1.52E+06 | 1.27E+06 | 1.79E+06 | 1.18E+06 | 1.23E+06 | 1.02E+06 |
| 1.01E+05 | 8.32E+04 | 9.63E+04 | 9.05E+04 | 7.62E+04 | 1.19E+05 | 8.47E+04 | 7.12E+04 | 5.69E+04 |
| 2.48E+04 | 2.10E+04 | 2.17E+04 | 1.94E+04 | 1.99E+04 | 2.34E+04 | 2.29E+04 | 2.20E+04 | 2.23E+04 |
| 5.29E+05 | 5.46E+05 | 6.24E+05 | 4.05E+05 | 5.75E+05 | 5.66E+05 | 6.15E+05 | 6.11E+05 | 6.32E+05 |
| 3.50E+04 | 2.75E+04 | 1.37E+04 | 5.07E+04 | 9.42E+03 | 1.07E+04 | 2.64E+04 | 1.62E+04 | 1.86E+04 |
| 1.16E+04 | 1.38E+04 | 2.13E+04 | 1.47E+04 | 1.06E+04 | 6.23E+03 | 5.34E+04 | 6.04E+04 | 7.89E+04 |
| 2.11E+05 | 2.59E+05 | 2.23E+05 | 4.03E+05 | 1.49E+05 | 1.29E+05 | 1.67E+06 | 1.56E+06 | 1.60E+06 |
| 7.99E+04 | 1.40E+05 | 2.17E+05 | 6.09E+04 | 1.86E+05 | 1.36E+05 | 2.06E+05 | 1.92E+05 | 2.02E+05 |
| 1.50E+05 | 9.20E+04 | 1.30E+05 | 2.12E+05 | 1.81E+05 | 2.73E+04 | 4.73E+05 | 4.20E+05 | 4.74E+05 |
| 1.55E+06 | 1.59E+06 | 1.68E+06 | 1.84E+06 | 1.77E+06 | 1.22E+06 | 4.29E+06 | 4.44E+06 | 3.98E+06 |
| 3.60E+06 | 2.63E+06 | 2.11E+06 | 3.68E+06 | 3.50E+06 | 2.09E+06 | 3.07E+06 | 1.93E+06 | 3.13E+06 |
| 3.60E+05 | 2.89E+05 | 3.62E+05 | 3.92E+05 | 2.21E+05 | 2.32E+05 | 6.37E+05 | 6.73E+05 | 7.05E+05 |
| 9.00E+00 | 9.00E+00 | 9.00E+00 | 9.00E+00 | 9.00E+00 | 9.00E+00 | 3.10E+05 | 2.55E+05 | 2.88E+05 |
| 7.30E+04 | 8.36E+04 | 9.29E+04 | 9.34E+04 | 1.34E+05 | 1.09E+05 | 2.82E+05 | 2.74E+05 | 2.52E+05 |
| 1.58E+05 | 1.73E+05 | 1.90E+05 | 2.15E+05 | 1.39E+05 | 1.26E+05 | 5.85E+05 | 5.99E+05 | 5.88E+05 |
| 1.26E+06 | 1.97E+06 | 2.94E+06 | 2.16E+06 | 2.09E+06 | 1.72E+06 | 2.10E+06 | 1.89E+06 | 2.03E+06 |
| 5.36E+06 | 4.86E+06 | 6.05E+06 | 5.52E+06 | 4.28E+06 | 4.37E+06 | 1.64E+07 | 1.51E+07 | 1.58E+07 |

|          |          |          |          |          |          |          |          |          |
|----------|----------|----------|----------|----------|----------|----------|----------|----------|
| 3.52E+06 | 4.04E+06 | 4.56E+06 | 5.26E+06 | 5.13E+06 | 4.16E+06 | 2.91E+06 | 3.24E+06 | 2.94E+06 |
| 6.47E+04 | 6.43E+04 | 4.62E+04 | 5.45E+04 | 4.13E+04 | 3.48E+04 | 5.41E+04 | 4.40E+04 | 5.66E+04 |
| 1.38E+05 | 1.27E+05 | 1.38E+05 | 1.58E+05 | 1.59E+05 | 1.35E+05 | 8.81E+04 | 8.09E+04 | 1.14E+05 |
| 1.03E+05 | 1.13E+05 | 1.29E+05 | 1.47E+05 | 8.62E+04 | 7.90E+04 | 1.68E+05 | 1.67E+05 | 1.60E+05 |
| 2.80E+05 | 2.65E+05 | 2.23E+05 | 4.71E+05 | 1.91E+05 | 9.26E+04 | 3.97E+05 | 3.78E+05 | 2.59E+05 |
| 6.37E+04 | 8.04E+04 | 1.01E+05 | 1.20E+05 | 3.86E+04 | 5.94E+04 | 4.37E+04 | 3.16E+04 | 4.70E+04 |
| 2.90E+05 | 4.24E+05 | 2.53E+05 | 4.47E+05 | 3.01E+05 | 2.43E+05 | 2.11E+05 | 2.16E+05 | 1.27E+05 |
| 1.62E+06 | 2.62E+06 | 2.27E+06 | 5.91E+05 | 2.54E+06 | 1.84E+06 | 8.58E+05 | 1.18E+06 | 7.47E+05 |
| 1.96E+04 | 1.66E+04 | 1.77E+04 | 2.05E+04 | 1.12E+04 | 2.08E+04 | 4.55E+04 | 6.79E+04 | 6.10E+04 |
| 1.83E+05 | 1.07E+05 | 2.47E+05 | 1.60E+05 | 1.37E+05 | 1.70E+05 | 9.58E+04 | 9.72E+04 | 8.49E+04 |
| 3.79E+04 | 2.56E+04 | 4.79E+04 | 2.90E+04 | 3.00E+04 | 4.28E+04 | 3.55E+04 | 4.01E+04 | 4.16E+04 |
| 8.69E+06 | 9.69E+06 | 1.14E+07 | 1.17E+07 | 1.02E+07 | 9.11E+06 | 7.67E+06 | 8.00E+06 | 9.03E+06 |
| 2.44E+05 | 2.25E+05 | 2.40E+05 | 2.31E+05 | 2.40E+05 | 2.30E+05 | 2.89E+05 | 2.69E+05 | 3.03E+05 |
| 8.50E+04 | 9.61E+04 | 1.16E+05 | 9.87E+04 | 1.12E+05 | 1.20E+05 | 9.57E+04 | 8.12E+04 | 8.00E+04 |
| 1.33E+05 | 8.07E+04 | 8.04E+04 | 1.01E+05 | 8.65E+04 | 8.04E+04 | 1.49E+05 | 1.24E+05 | 1.20E+05 |
| 5.78E+04 | 4.85E+04 | 6.31E+04 | 6.85E+04 | 5.84E+04 | 3.63E+04 | 1.91E+05 | 2.02E+05 | 2.03E+05 |
| 2.28E+05 | 2.67E+05 | 2.79E+05 | 2.99E+04 | 3.30E+05 | 2.95E+05 | 4.66E+06 | 5.32E+06 | 4.54E+06 |
| 6.69E+05 | 4.84E+05 | 6.15E+05 | 6.57E+05 | 6.37E+05 | 4.10E+05 | 1.17E+06 | 1.17E+06 | 1.16E+06 |
| 1.33E+06 | 8.25E+05 | 1.42E+06 | 1.36E+06 | 1.45E+06 | 1.17E+06 | 1.38E+06 | 1.56E+06 | 1.45E+06 |
| 2.62E+07 | 2.23E+07 | 1.97E+07 | 2.41E+07 | 2.74E+07 | 1.82E+07 | 4.34E+07 | 4.53E+07 | 4.91E+07 |
| 1.41E+05 | 1.73E+05 | 1.95E+05 | 1.90E+05 | 2.53E+05 | 1.88E+05 | 1.63E+05 | 1.89E+05 | 1.57E+05 |
| 1.75E+05 | 8.46E+04 | 1.54E+05 | 1.18E+05 | 1.36E+05 | 1.35E+05 | 1.23E+06 | 1.22E+06 | 1.13E+06 |
| 3.62E+05 | 2.54E+05 | 4.96E+05 | 4.72E+05 | 2.23E+05 | 1.97E+05 | 2.58E+06 | 2.55E+06 | 2.53E+06 |
| 8.06E+05 | 4.81E+05 | 7.28E+05 | 1.78E+05 | 2.09E+05 | 1.04E+06 | 3.66E+05 | 5.54E+05 | 5.14E+05 |
| 9.00E+00 | 9.00E+00 | 9.00E+00 | 9.00E+00 | 9.00E+00 | 9.00E+00 | 4.97E+05 | 4.84E+05 | 4.54E+05 |
| 9.00E+00 | 9.00E+00 | 9.00E+00 | 9.00E+00 | 9.00E+00 | 9.79E+03 | 7.44E+04 | 4.38E+04 | 5.03E+04 |
| 1.76E+05 | 1.24E+05 | 1.68E+05 | 1.66E+05 | 1.31E+05 | 1.46E+05 | 1.84E+05 | 1.50E+05 | 1.79E+05 |
| 8.72E+04 | 6.71E+04 | 6.53E+04 | 9.07E+04 | 7.19E+04 | 5.81E+04 | 6.57E+04 | 7.89E+04 | 5.82E+04 |
| 2.21E+05 | 1.64E+05 | 2.06E+05 | 2.08E+05 | 1.67E+05 | 1.91E+05 | 1.70E+05 | 1.50E+05 | 1.28E+05 |
| 3.89E+06 | 3.56E+06 | 4.08E+06 | 5.95E+06 | 4.39E+06 | 3.13E+06 | 3.03E+06 | 2.92E+06 | 2.81E+06 |
| 1.22E+05 | 1.06E+05 | 1.56E+05 | 1.36E+05 | 1.37E+05 | 1.24E+05 | 1.31E+05 | 1.19E+05 | 1.08E+05 |
| 5.64E+05 | 5.10E+05 | 6.17E+05 | 6.30E+05 | 4.12E+05 | 4.67E+05 | 6.17E+05 | 6.97E+05 | 6.22E+05 |
| 1.24E+06 | 1.10E+06 | 1.12E+06 | 1.37E+06 | 1.51E+06 | 1.23E+06 | 8.88E+05 | 9.75E+05 | 9.98E+05 |
| 5.03E+04 | 3.27E+04 | 4.33E+04 | 3.81E+04 | 2.99E+04 | 5.23E+04 | 5.10E+04 | 5.08E+04 | 5.76E+04 |
| 4.27E+05 | 3.86E+05 | 3.95E+05 | 3.60E+05 | 4.61E+05 | 3.37E+05 | 1.90E+05 | 2.09E+05 | 1.85E+05 |
| 2.90E+05 | 3.05E+05 | 4.05E+05 | 3.22E+05 | 2.60E+05 | 3.08E+05 | 1.46E+05 | 1.44E+05 | 1.72E+05 |
| 1.26E+05 | 9.53E+04 | 1.45E+05 | 1.26E+05 | 1.47E+05 | 1.74E+05 | 1.62E+05 | 1.65E+05 | 1.41E+05 |
| 7.22E+03 | 1.35E+04 | 5.41E+03 | 3.58E+03 | 1.35E+04 | 9.00E+03 | 1.23E+05 | 1.55E+05 | 1.51E+05 |
| 1.43E+05 | 8.00E+04 | 1.57E+05 | 1.44E+05 | 1.23E+05 | 1.58E+05 | 1.26E+05 | 1.30E+05 | 1.45E+05 |
| 2.06E+05 | 2.50E+05 | 2.48E+05 | 2.43E+05 | 2.70E+05 | 1.52E+05 | 3.73E+05 | 3.92E+05 | 3.57E+05 |
| 3.61E+05 | 3.83E+05 | 5.41E+05 | 4.42E+05 | 4.66E+05 | 3.77E+05 | 2.76E+05 | 2.52E+05 | 2.83E+05 |
| 2.15E+05 | 2.23E+05 | 2.86E+05 | 2.48E+05 | 2.38E+05 | 1.83E+05 | 1.16E+05 | 1.39E+05 | 1.43E+05 |
| 3.09E+05 | 2.96E+05 | 2.23E+05 | 2.75E+05 | 4.16E+04 | 1.45E+05 | 2.43E+05 | 2.26E+05 | 2.38E+05 |
| 3.23E+05 | 2.78E+05 | 4.85E+05 | 2.52E+05 | 6.87E+05 | 1.94E+05 | 2.62E+05 | 2.38E+05 | 2.67E+05 |
| 6.84E+04 | 9.30E+04 | 1.09E+05 | 1.19E+05 | 9.88E+04 | 1.05E+05 | 5.51E+04 | 6.88E+04 | 5.73E+04 |
| 1.18E+05 | 6.49E+04 | 1.73E+05 | 1.15E+05 | 1.84E+05 | 9.60E+04 | 1.59E+05 | 1.32E+05 | 1.56E+05 |
| 3.16E+04 | 3.29E+04 | 4.04E+04 | 2.61E+04 | 2.85E+04 | 3.18E+04 | 1.39E+04 | 3.04E+04 | 3.38E+04 |
| 3.08E+04 | 1.34E+04 | 2.09E+04 | 1.82E+04 | 2.59E+04 | 2.86E+04 | 4.00E+04 | 2.84E+04 | 2.88E+04 |
| 1.06E+05 | 7.50E+04 | 1.41E+05 | 1.03E+05 | 1.14E+05 | 1.21E+05 | 2.79E+05 | 3.06E+05 | 2.85E+05 |
| 5.12E+05 | 3.58E+05 | 6.11E+05 | 3.65E+05 | 5.40E+05 | 6.38E+05 | 1.41E+06 | 1.42E+06 | 1.46E+06 |
| 1.12E+06 | 9.94E+05 | 1.52E+06 | 1.20E+06 | 8.62E+05 | 1.43E+06 | 2.82E+06 | 2.30E+06 | 2.50E+06 |
| 4.11E+05 | 4.21E+05 | 4.42E+05 | 4.09E+05 | 2.82E+05 | 4.00E+05 | 1.95E+05 | 1.92E+05 | 2.27E+05 |
| 1.09E+06 | 9.56E+05 | 1.56E+06 | 9.05E+05 | 9.70E+05 | 1.11E+06 | 1.32E+06 | 1.57E+06 | 1.45E+06 |
| 1.71E+05 | 1.21E+05 | 1.40E+05 | 1.87E+05 | 9.77E+04 | 9.35E+04 | 8.37E+04 | 7.50E+04 | 7.90E+04 |



|          |          |          |          |          |          |          |          |          |
|----------|----------|----------|----------|----------|----------|----------|----------|----------|
| 1.15E+04 | 8.60E+03 | 1.55E+04 | 1.27E+04 | 9.89E+03 | 1.32E+04 | 3.23E+04 | 3.17E+04 | 2.65E+04 |
| 6.60E+05 | 6.74E+05 | 9.49E+05 | 6.59E+05 | 6.51E+05 | 4.03E+05 | 5.67E+05 | 5.97E+05 | 6.08E+05 |
| 6.69E+05 | 7.12E+05 | 6.33E+05 | 6.63E+05 | 7.65E+05 | 4.62E+05 | 2.99E+05 | 3.09E+05 | 3.71E+05 |
| 6.94E+04 | 8.09E+04 | 5.91E+04 | 8.60E+04 | 1.31E+05 | 3.63E+04 | 7.37E+04 | 4.60E+04 | 4.62E+04 |
| 4.72E+05 | 3.76E+05 | 5.69E+05 | 2.00E+05 | 5.62E+05 | 4.95E+05 | 6.59E+05 | 7.53E+05 | 6.56E+05 |
| 5.45E+06 | 3.93E+06 | 7.42E+06 | 3.11E+06 | 9.83E+06 | 9.27E+06 | 1.49E+07 | 1.59E+07 | 1.38E+07 |
| 4.82E+04 | 4.16E+04 | 6.40E+04 | 5.52E+04 | 3.19E+04 | 5.60E+04 | 7.74E+04 | 9.65E+04 | 1.16E+05 |
| 9.28E+04 | 7.85E+04 | 6.61E+04 | 7.22E+04 | 7.83E+04 | 9.17E+04 | 5.56E+04 | 5.39E+04 | 4.15E+04 |
| 1.37E+03 | 3.27E+03 | 3.63E+03 | 4.02E+03 | 3.48E+03 | 3.72E+03 | 5.01E+03 | 5.96E+03 | 5.02E+03 |
| 5.66E+02 | 1.61E+03 | 2.21E+03 | 1.69E+03 | 9.83E+02 | 1.09E+03 | 8.05E+03 | 8.15E+03 | 7.20E+03 |
| 2.33E+03 | 2.75E+03 | 3.94E+03 | 4.33E+03 | 2.86E+03 | 3.32E+03 | 5.03E+03 | 5.03E+03 | 4.96E+03 |
| 9.00E+00 | 9.00E+00 | 1.17E+04 | 9.00E+00 | 9.00E+00 | 9.00E+00 | 2.14E+04 | 2.05E+04 | 2.09E+04 |
| 3.36E+03 | 5.50E+03 | 9.60E+03 | 1.02E+04 | 6.28E+03 | 4.59E+03 | 1.10E+04 | 1.33E+04 | 1.27E+04 |
| 1.24E+04 | 1.18E+04 | 1.30E+04 | 1.42E+04 | 1.50E+04 | 1.39E+04 | 1.38E+04 | 1.30E+04 | 1.42E+04 |
| 2.98E+03 | 2.95E+03 | 3.25E+03 | 3.37E+03 | 2.94E+03 | 4.72E+03 | 6.60E+03 | 5.80E+03 | 5.42E+03 |
| 1.79E+03 | 2.01E+03 | 2.04E+03 | 1.81E+03 | 9.59E+02 | 1.35E+03 | 1.29E+03 | 1.12E+03 | 1.84E+03 |
| 6.28E+03 | 1.09E+04 | 6.36E+03 | 8.16E+03 | 8.85E+03 | 1.28E+04 | 1.41E+04 | 2.62E+04 | 1.49E+04 |
| 1.89E+05 | 2.27E+05 | 1.90E+05 | 2.33E+05 | 2.03E+05 | 1.57E+05 | 3.22E+05 | 3.05E+05 | 3.40E+05 |
| 5.29E+04 | 5.26E+04 | 4.64E+04 | 4.57E+04 | 5.09E+04 | 4.78E+04 | 5.30E+04 | 6.19E+04 | 5.73E+04 |
| 1.94E+05 | 2.14E+05 | 1.79E+05 | 8.77E+04 | 2.73E+05 | 1.61E+05 | 1.53E+05 | 9.40E+04 | 1.14E+05 |
| 1.35E+04 | 1.15E+04 | 3.31E+04 | 2.24E+04 | 3.04E+04 | 2.93E+04 | 1.88E+04 | 2.37E+04 | 2.35E+04 |
| 1.19E+05 | 1.06E+05 | 1.05E+05 | 1.04E+05 | 1.00E+05 | 1.04E+05 | 1.07E+05 | 1.04E+05 | 1.24E+05 |
| 2.90E+04 | 1.70E+04 | 2.39E+04 | 4.18E+04 | 2.05E+04 | 2.51E+04 | 1.45E+04 | 1.43E+04 | 1.96E+04 |
| 1.75E+05 | 1.49E+05 | 1.67E+05 | 1.88E+05 | 1.77E+05 | 1.93E+05 | 1.04E+05 | 1.04E+05 | 1.02E+05 |
| 1.74E+04 | 1.12E+04 | 3.03E+03 | 1.73E+04 | 3.10E+04 | 1.12E+04 | 4.35E+04 | 6.36E+04 | 4.97E+04 |
| 8.88E+03 | 1.33E+04 | 1.29E+04 | 7.93E+03 | 5.90E+03 | 7.35E+03 | 6.53E+03 | 1.36E+04 | 6.14E+03 |
| 2.02E+05 | 2.55E+05 | 1.28E+05 | 1.83E+05 | 1.67E+05 | 1.09E+05 | 1.88E+05 | 1.59E+05 | 1.84E+05 |
| 2.95E+04 | 5.41E+04 | 6.16E+04 | 5.29E+04 | 3.58E+04 | 3.92E+04 | 1.88E+05 | 1.63E+05 | 1.74E+05 |
| 1.08E+05 | 7.62E+04 | 7.55E+04 | 1.05E+05 | 1.30E+05 | 1.19E+05 | 1.15E+05 | 1.22E+05 | 1.32E+05 |
| 1.87E+05 | 1.18E+05 | 1.66E+05 | 1.48E+05 | 1.14E+05 | 1.38E+05 | 1.30E+05 | 1.16E+05 | 1.27E+05 |
| 1.05E+06 | 9.03E+05 | 1.16E+06 | 1.02E+06 | 1.03E+06 | 9.05E+05 | 9.02E+05 | 7.96E+05 | 8.93E+05 |
| 4.83E+04 | 3.28E+04 | 5.31E+04 | 4.57E+04 | 4.63E+04 | 5.11E+04 | 3.62E+04 | 3.80E+04 | 3.58E+04 |
| 1.66E+05 | 7.04E+04 | 1.64E+05 | 8.72E+04 | 1.24E+05 | 2.15E+05 | 3.32E+05 | 3.33E+05 | 3.49E+05 |
| 3.25E+04 | 2.34E+04 | 3.56E+04 | 2.16E+04 | 3.43E+04 | 2.92E+04 | 6.38E+04 | 5.89E+04 | 6.03E+04 |
| 1.76E+05 | 1.74E+05 | 1.75E+05 | 2.37E+05 | 1.24E+05 | 1.19E+05 | 2.37E+05 | 2.58E+05 | 2.41E+05 |
| 5.02E+04 | 1.19E+05 | 2.71E+04 | 1.17E+05 | 1.11E+05 | 1.18E+05 | 9.86E+04 | 7.93E+04 | 1.15E+05 |
| 1.04E+05 | 9.46E+04 | 5.89E+04 | 6.79E+04 | 9.42E+04 | 5.49E+04 | 1.02E+05 | 7.43E+04 | 1.03E+05 |
| 9.30E+04 | 9.62E+04 | 7.43E+04 | 8.49E+04 | 5.23E+04 | 5.41E+04 | 1.97E+05 | 2.93E+05 | 2.26E+05 |
| 1.44E+05 | 1.55E+05 | 1.20E+05 | 1.17E+05 | 1.62E+05 | 6.04E+04 | 1.53E+05 | 1.51E+05 | 1.75E+05 |
| 2.52E+06 | 2.57E+06 | 2.74E+06 | 2.70E+06 | 2.75E+06 | 2.29E+06 | 2.14E+06 | 2.18E+06 | 2.02E+06 |
| 2.48E+05 | 2.96E+05 | 9.88E+04 | 1.84E+05 | 1.45E+05 | 1.29E+05 | 1.70E+05 | 1.66E+05 | 2.30E+05 |
| 1.41E+06 | 1.55E+06 | 9.77E+05 | 1.21E+06 | 1.11E+06 | 8.32E+05 | 1.81E+06 | 1.81E+06 | 1.84E+06 |
| 1.51E+04 | 2.15E+04 | 6.01E+03 | 2.93E+04 | 1.14E+04 | 7.37E+03 | 1.55E+04 | 1.56E+04 | 1.76E+04 |
| 2.84E+04 | 1.78E+04 | 3.15E+04 | 2.35E+04 | 3.96E+04 | 2.58E+04 | 4.72E+04 | 4.81E+04 | 6.80E+04 |
| 3.30E+04 | 4.62E+04 | 2.80E+04 | 4.39E+04 | 2.69E+04 | 2.84E+04 | 4.75E+04 | 5.77E+04 | 3.51E+04 |
| 4.68E+04 | 4.19E+04 | 3.91E+04 | 3.34E+04 | 2.52E+04 | 3.16E+04 | 2.78E+05 | 2.48E+05 | 2.85E+05 |
| 1.54E+04 | 8.13E+03 | 2.13E+04 | 4.03E+03 | 1.56E+04 | 8.19E+03 | 3.04E+04 | 2.52E+04 | 4.37E+04 |
| 5.33E+05 | 5.01E+05 | 5.43E+05 | 4.31E+05 | 5.06E+05 | 4.62E+05 | 3.65E+05 | 3.60E+05 | 3.74E+05 |
| 1.67E+05 | 1.46E+05 | 1.82E+05 | 1.18E+05 | 1.12E+05 | 1.24E+05 | 1.19E+05 | 1.68E+05 | 1.05E+05 |
| 3.25E+04 | 2.27E+04 | 4.81E+04 | 2.60E+04 | 3.71E+04 | 5.04E+04 | 6.55E+04 | 4.49E+04 | 4.11E+04 |
| 2.47E+05 | 1.74E+05 | 1.83E+05 | 1.74E+05 | 2.08E+05 | 1.64E+05 | 2.79E+05 | 2.92E+05 | 2.40E+05 |
| 5.60E+03 | 5.81E+03 | 4.80E+03 | 4.53E+03 | 5.15E+03 | 6.22E+03 | 9.29E+03 | 9.45E+03 | 7.23E+03 |
| 8.69E+03 | 1.08E+04 | 9.29E+03 | 1.03E+04 | 9.86E+03 | 1.87E+04 | 2.37E+04 | 2.23E+04 | 1.65E+04 |
| 9.58E+04 | 7.90E+04 | 6.82E+04 | 5.17E+04 | 8.81E+04 | 1.17E+04 | 1.64E+05 | 1.45E+05 | 1.72E+05 |

|          |          |          |          |          |          |          |          |          |
|----------|----------|----------|----------|----------|----------|----------|----------|----------|
| 1.54E+05 | 1.10E+05 | 1.65E+05 | 1.85E+05 | 2.55E+04 | 1.35E+05 | 3.36E+05 | 4.82E+05 | 4.92E+05 |
| 6.28E+05 | 8.36E+05 | 6.56E+05 | 9.56E+05 | 7.35E+05 | 6.64E+05 | 1.38E+06 | 1.39E+06 | 1.29E+06 |
| 3.90E+06 | 3.58E+06 | 3.91E+06 | 3.22E+06 | 4.13E+06 | 3.55E+06 | 2.92E+06 | 2.82E+06 | 2.83E+06 |
| 5.26E+05 | 4.04E+05 | 3.66E+05 | 7.79E+05 | 6.06E+05 | 2.68E+05 | 5.25E+05 | 1.74E+05 | 4.72E+05 |
| 1.80E+05 | 1.36E+05 | 1.65E+05 | 1.65E+05 | 1.99E+05 | 1.49E+05 | 1.37E+05 | 1.30E+05 | 1.45E+05 |
| 9.00E+00 | 9.00E+00 | 9.00E+00 | 9.00E+00 | 9.00E+00 | 9.00E+00 | 1.70E+04 | 1.94E+04 | 1.89E+04 |
| 1.30E+06 | 1.15E+06 | 1.08E+06 | 9.91E+05 | 1.65E+06 | 1.25E+06 | 2.82E+06 | 2.97E+06 | 2.86E+06 |
| 7.98E+06 | 9.24E+06 | 8.60E+06 | 8.51E+06 | 8.56E+06 | 8.76E+06 | 1.79E+07 | 1.86E+07 | 1.90E+07 |
| 1.21E+05 | 1.32E+05 | 8.69E+04 | 1.42E+05 | 9.35E+04 | 7.17E+04 | 1.32E+05 | 1.20E+05 | 9.98E+04 |
| 2.34E+05 | 1.89E+05 | 1.56E+05 | 1.77E+05 | 1.16E+05 | 1.16E+05 | 2.19E+05 | 2.19E+05 | 2.06E+05 |
| 6.17E+04 | 4.69E+04 | 3.20E+04 | 5.28E+04 | 1.83E+04 | 3.36E+04 | 7.79E+04 | 6.38E+04 | 7.09E+04 |
| 1.02E+05 | 9.32E+04 | 9.98E+04 | 1.10E+05 | 1.19E+05 | 1.20E+05 | 1.30E+05 | 1.21E+05 | 1.32E+05 |
| 1.20E+05 | 1.00E+05 | 1.31E+05 | 4.88E+04 | 4.11E+04 | 1.00E+05 | 1.84E+05 | 2.12E+05 | 1.88E+05 |
| 2.29E+05 | 2.32E+05 | 2.54E+05 | 2.26E+05 | 2.18E+05 | 2.61E+05 | 2.95E+05 | 3.41E+05 | 2.71E+05 |
| 1.19E+06 | 1.25E+06 | 1.63E+06 | 1.25E+06 | 1.09E+06 | 1.44E+06 | 2.66E+06 | 2.68E+06 | 2.69E+06 |
| 3.91E+04 | 3.08E+04 | 3.57E+04 | 4.81E+04 | 3.33E+04 | 2.87E+04 | 3.79E+04 | 4.71E+04 | 4.66E+04 |
| 4.43E+04 | 6.35E+04 | 4.53E+04 | 3.69E+04 | 3.31E+04 | 5.20E+04 | 6.97E+04 | 5.18E+04 | 5.54E+04 |
| 4.06E+05 | 5.05E+05 | 3.03E+05 | 3.94E+05 | 3.67E+05 | 2.84E+05 | 4.09E+05 | 3.58E+05 | 3.69E+05 |
| 9.00E+00 | 9.00E+00 | 9.00E+00 | 1.27E+04 | 9.00E+00 | 9.00E+00 | 2.47E+04 | 1.76E+04 | 1.77E+04 |
| 1.40E+04 | 2.03E+04 | 2.72E+04 | 2.64E+04 | 3.18E+04 | 3.35E+04 | 3.52E+04 | 4.07E+04 | 3.40E+04 |
| 2.43E+04 | 1.75E+04 | 4.19E+04 | 2.93E+04 | 2.37E+04 | 4.32E+04 | 3.84E+04 | 4.38E+04 | 1.90E+04 |
| 3.88E+04 | 3.61E+04 | 5.70E+04 | 4.89E+04 | 2.75E+04 | 5.98E+04 | 7.93E+04 | 7.45E+04 | 8.46E+04 |
| 1.64E+05 | 1.73E+05 | 2.12E+05 | 2.22E+05 | 1.97E+05 | 1.79E+05 | 1.03E+05 | 1.06E+05 | 1.15E+05 |
| 4.96E+04 | 3.54E+04 | 3.74E+04 | 5.78E+04 | 4.38E+04 | 3.87E+04 | 8.36E+04 | 9.82E+04 | 6.78E+04 |
| 4.58E+05 | 4.16E+05 | 4.92E+05 | 4.39E+05 | 3.83E+05 | 4.15E+05 | 4.41E+05 | 4.14E+05 | 4.28E+05 |
| 6.56E+05 | 6.82E+05 | 6.10E+05 | 8.78E+05 | 6.73E+05 | 6.51E+05 | 7.23E+05 | 7.06E+05 | 7.23E+05 |
| 5.86E+04 | 6.63E+04 | 4.42E+04 | 7.56E+04 | 7.27E+04 | 8.31E+04 | 8.31E+04 | 8.43E+04 | 5.83E+04 |
| 1.19E+04 | 9.60E+03 | 1.24E+04 | 1.23E+04 | 9.60E+03 | 7.07E+03 | 5.03E+04 | 5.07E+04 | 5.23E+04 |
| 5.85E+05 | 5.54E+05 | 6.46E+05 | 5.96E+05 | 4.71E+05 | 5.37E+05 | 1.12E+06 | 1.10E+06 | 1.13E+06 |
| 1.13E+04 | 6.06E+03 | 8.06E+03 | 1.00E+04 | 9.29E+03 | 7.36E+03 | 4.15E+04 | 4.63E+04 | 3.53E+04 |
| 3.92E+04 | 3.31E+04 | 3.65E+04 | 3.56E+04 | 3.38E+04 | 3.50E+04 | 6.36E+04 | 6.00E+04 | 6.10E+04 |
| 2.59E+04 | 2.91E+04 | 2.14E+04 | 2.71E+04 | 2.97E+04 | 9.52E+03 | 3.57E+04 | 4.38E+04 | 4.41E+04 |
| 9.00E+00 | 9.00E+00 | 9.00E+00 | 9.00E+00 | 9.00E+00 | 9.00E+00 | 1.64E+05 | 3.79E+05 | 2.16E+05 |
| 9.00E+00 | 9.00E+00 | 9.00E+00 | 9.00E+00 | 9.00E+00 | 9.00E+00 | 1.30E+05 | 1.21E+05 | 1.23E+05 |
| 8.29E+05 | 7.95E+05 | 6.41E+05 | 6.99E+05 | 9.69E+05 | 5.19E+05 | 6.45E+05 | 5.62E+05 | 5.90E+05 |
| 3.22E+03 | 9.00E+00 | 9.00E+00 | 5.12E+03 | 9.00E+00 | 9.00E+00 | 7.49E+04 | 5.95E+04 | 5.28E+04 |
| 5.23E+03 | 1.70E+04 | 1.23E+04 | 2.09E+04 | 4.41E+03 | 6.35E+03 | 1.95E+04 | 2.14E+04 | 1.43E+04 |
| 1.60E+04 | 1.23E+04 | 1.58E+04 | 1.30E+04 | 1.06E+04 | 1.87E+04 | 1.20E+04 | 8.54E+03 | 1.12E+04 |
| 8.54E+03 | 1.03E+04 | 7.38E+03 | 7.79E+03 | 8.68E+03 | 6.45E+03 | 9.39E+03 | 9.20E+03 | 9.47E+03 |
| 4.50E+05 | 3.57E+05 | 3.52E+05 | 3.45E+05 | 3.42E+05 | 4.45E+05 | 2.95E+05 | 3.02E+05 | 3.08E+05 |
| 1.42E+04 | 1.25E+04 | 1.29E+04 | 1.09E+04 | 1.11E+04 | 1.17E+04 | 1.40E+04 | 1.12E+04 | 1.41E+04 |
| 1.86E+04 | 1.54E+04 | 1.66E+04 | 2.79E+04 | 2.03E+04 | 2.38E+04 | 2.38E+04 | 2.41E+04 | 2.50E+04 |
| 2.72E+04 | 1.63E+04 | 2.35E+04 | 3.15E+04 | 1.85E+04 | 9.65E+03 | 2.74E+04 | 2.56E+04 | 1.57E+04 |
| 3.73E+04 | 2.30E+04 | 5.01E+04 | 1.95E+04 | 2.62E+04 | 1.44E+04 | 5.50E+04 | 5.69E+04 | 5.71E+04 |
| 4.97E+04 | 1.33E+05 | 9.02E+04 | 1.96E+05 | 7.62E+04 | 6.63E+04 | 1.27E+05 | 1.42E+05 | 1.17E+05 |
| 1.17E+05 | 1.34E+05 | 1.51E+05 | 1.20E+05 | 1.28E+05 | 9.53E+04 | 1.53E+05 | 1.40E+05 | 1.14E+05 |
| 1.35E+06 | 1.50E+06 | 1.04E+06 | 5.59E+05 | 1.04E+06 | 1.24E+06 | 7.12E+05 | 7.22E+05 | 7.61E+05 |
| 1.37E+05 | 1.54E+05 | 1.54E+05 | 1.89E+05 | 1.63E+05 | 1.40E+05 | 1.07E+05 | 1.08E+05 | 1.17E+05 |
| 3.62E+05 | 1.98E+05 | 3.82E+05 | 2.60E+05 | 2.71E+05 | 3.89E+05 | 3.09E+05 | 2.34E+05 | 1.99E+05 |
| 1.20E+05 | 9.14E+04 | 8.09E+04 | 9.63E+04 | 1.29E+05 | 1.16E+05 | 2.55E+05 | 2.33E+05 | 2.37E+05 |
| 1.38E+05 | 1.01E+05 | 1.22E+05 | 8.02E+04 | 1.54E+05 | 7.71E+04 | 1.52E+05 | 8.56E+04 | 8.90E+04 |
| 9.00E+00 | 9.00E+00 | 9.00E+00 | 9.00E+00 | 9.00E+00 | 9.00E+00 | 7.05E+04 | 7.98E+04 | 7.63E+04 |
| 2.00E+05 | 2.48E+05 | 9.47E+04 | 3.75E+05 | 4.02E+05 | 2.85E+05 | 9.32E+04 | 2.77E+05 | 2.27E+05 |
| 9.48E+05 | 9.43E+05 | 9.41E+05 | 1.35E+06 | 1.04E+06 | 7.16E+05 | 2.44E+06 | 2.38E+06 | 2.33E+06 |

|          |          |          |          |          |          |          |          |          |
|----------|----------|----------|----------|----------|----------|----------|----------|----------|
| 2.25E+04 | 9.00E+00 | 9.00E+00 | 2.00E+04 | 9.00E+00 | 9.00E+00 | 1.24E+06 | 1.12E+06 | 1.08E+06 |
| 9.00E+00 | 1.02E+06 | 1.15E+06 | 9.00E+00 | 9.00E+00 | 9.00E+00 | 2.39E+06 | 2.30E+06 | 1.82E+06 |
| 9.00E+00 | 9.00E+00 | 9.00E+00 | 9.00E+00 | 9.00E+00 | 9.00E+00 | 1.76E+05 | 1.72E+05 | 1.69E+05 |
| 6.89E+04 | 5.00E+04 | 8.27E+04 | 6.10E+04 | 5.73E+04 | 5.73E+04 | 5.95E+04 | 6.14E+04 | 6.16E+04 |
| 3.52E+04 | 3.63E+04 | 4.03E+04 | 4.42E+04 | 2.87E+04 | 2.15E+04 | 3.32E+04 | 2.44E+04 | 2.73E+04 |
| 1.57E+07 | 1.67E+07 | 1.95E+07 | 2.02E+07 | 1.91E+07 | 1.68E+07 | 1.26E+07 | 1.15E+07 | 1.19E+07 |
| 6.34E+05 | 6.57E+05 | 7.07E+05 | 8.79E+05 | 4.66E+05 | 4.14E+05 | 9.18E+05 | 9.43E+05 | 9.44E+05 |
| 8.18E+04 | 9.04E+04 | 1.12E+05 | 1.49E+05 | 9.72E+04 | 6.37E+04 | 7.23E+04 | 6.46E+04 | 8.23E+04 |
| 7.03E+05 | 5.89E+05 | 6.80E+05 | 6.77E+05 | 7.61E+05 | 6.42E+05 | 8.15E+05 | 9.65E+05 | 7.86E+05 |
| 8.58E+04 | 1.02E+05 | 1.74E+05 | 1.76E+05 | 1.13E+05 | 1.39E+05 | 6.52E+05 | 7.24E+05 | 6.52E+05 |
| 2.93E+05 | 2.48E+05 | 3.03E+05 | 2.80E+05 | 2.30E+05 | 2.86E+05 | 5.19E+05 | 4.76E+05 | 5.20E+05 |
| 4.88E+05 | 4.79E+05 | 5.30E+05 | 5.11E+05 | 5.78E+05 | 6.24E+05 | 4.63E+05 | 3.83E+05 | 4.61E+05 |
| 1.97E+05 | 1.65E+05 | 1.80E+05 | 2.05E+05 | 1.24E+05 | 1.47E+05 | 1.95E+05 | 1.89E+05 | 1.89E+05 |
| 4.66E+04 | 3.98E+04 | 6.53E+04 | 4.54E+04 | 5.70E+04 | 6.84E+04 | 5.51E+04 | 6.07E+04 | 5.98E+04 |
| 3.97E+06 | 4.61E+06 | 4.16E+06 | 4.06E+06 | 2.73E+06 | 4.84E+06 | 3.76E+06 | 2.43E+06 | 3.34E+06 |
| 2.75E+05 | 2.74E+05 | 4.20E+05 | 3.96E+05 | 3.40E+05 | 3.48E+05 | 6.44E+06 | 6.68E+06 | 6.14E+06 |
| 9.00E+00 | 9.00E+00 | 9.00E+00 | 9.00E+00 | 9.00E+00 | 9.00E+00 | 4.19E+04 | 5.93E+04 | 4.29E+04 |
| 4.45E+04 | 3.21E+04 | 2.09E+05 | 1.66E+05 | 1.94E+05 | 1.56E+05 | 5.83E+05 | 6.30E+05 | 5.64E+05 |
| 5.49E+07 | 6.63E+07 | 6.98E+07 | 6.25E+07 | 7.21E+07 | 5.43E+07 | 1.47E+08 | 1.49E+08 | 1.46E+08 |
| 1.51E+05 | 5.30E+04 | 1.70E+05 | 1.67E+05 | 1.91E+05 | 1.47E+05 | 5.46E+06 | 4.78E+06 | 4.76E+06 |
| 7.87E+04 | 9.49E+04 | 1.11E+05 | 1.39E+05 | 9.85E+04 | 8.12E+04 | 3.27E+05 | 3.03E+05 | 2.94E+05 |
| 9.50E+04 | 1.07E+05 | 8.89E+04 | 9.95E+04 | 1.05E+05 | 9.46E+04 | 9.94E+04 | 1.17E+05 | 1.20E+05 |
| 6.36E+04 | 7.26E+04 | 5.48E+04 | 7.90E+04 | 7.77E+04 | 6.79E+04 | 1.28E+05 | 1.24E+05 | 1.31E+05 |
| 1.86E+05 | 1.99E+05 | 1.45E+05 | 2.11E+05 | 1.41E+05 | 2.07E+05 | 2.29E+05 | 2.49E+05 | 2.01E+05 |
| 3.71E+04 | 9.00E+00 | 9.00E+00 | 9.00E+00 | 3.35E+04 | 9.00E+00 | 2.96E+05 | 3.35E+05 | 3.69E+05 |
| 1.09E+05 | 1.18E+05 | 1.67E+05 | 1.20E+05 | 1.17E+05 | 1.10E+05 | 4.90E+05 | 4.36E+05 | 4.25E+05 |
| 5.82E+05 | 5.55E+05 | 6.97E+05 | 5.71E+05 | 5.70E+05 | 5.85E+05 | 1.48E+06 | 1.91E+06 | 1.48E+06 |
| 1.03E+05 | 4.33E+04 | 8.46E+04 | 7.41E+04 | 8.91E+04 | 6.29E+04 | 1.18E+05 | 9.97E+04 | 1.27E+05 |
| 3.30E+06 | 3.14E+06 | 3.39E+06 | 4.01E+06 | 2.73E+06 | 1.85E+06 | 4.28E+07 | 3.35E+07 | 4.17E+07 |
| 2.24E+04 | 2.11E+04 | 3.21E+04 | 3.10E+04 | 1.12E+04 | 1.32E+04 | 3.75E+06 | 2.90E+06 | 3.27E+06 |
| 9.00E+00 | 1.23E+04 | 9.00E+00 | 9.00E+00 | 9.00E+00 | 1.04E+04 | 2.72E+04 | 3.31E+04 | 3.56E+04 |
| 6.83E+04 | 6.54E+04 | 9.33E+04 | 7.55E+04 | 2.71E+04 | 7.63E+04 | 2.10E+05 | 1.88E+05 | 2.15E+05 |
| 9.00E+00 | 9.00E+00 | 9.00E+00 | 9.00E+00 | 9.00E+00 | 9.00E+00 | 2.16E+05 | 2.26E+05 | 2.12E+05 |
| 5.43E+05 | 6.39E+05 | 6.38E+05 | 6.53E+05 | 5.70E+05 | 5.36E+05 | 7.69E+05 | 8.04E+05 | 7.39E+05 |
| 2.24E+05 | 2.40E+05 | 2.53E+05 | 2.85E+05 | 2.47E+05 | 2.74E+05 | 1.50E+05 | 1.93E+05 | 1.51E+05 |
| 1.36E+04 | 9.00E+00 | 9.00E+00 | 1.59E+04 | 9.00E+00 | 9.00E+00 | 1.03E+05 | 9.05E+04 | 9.61E+04 |
| 2.70E+04 | 3.11E+04 | 3.06E+04 | 4.26E+04 | 2.90E+04 | 9.00E+00 | 1.26E+05 | 1.41E+05 | 1.23E+05 |
| 9.14E+04 | 5.70E+04 | 1.15E+05 | 6.48E+04 | 1.00E+05 | 9.71E+04 | 7.61E+04 | 6.32E+04 | 6.08E+04 |
| 5.19E+04 | 7.50E+04 | 8.70E+04 | 9.41E+04 | 3.80E+04 | 4.07E+04 | 7.91E+05 | 8.01E+05 | 8.07E+05 |
| 9.00E+00 | 1.99E+04 | 9.00E+00 | 1.92E+04 | 9.00E+00 | 9.00E+00 | 6.86E+04 | 5.49E+04 | 7.71E+04 |
| 1.04E+06 | 9.92E+05 | 9.09E+05 | 9.16E+05 | 9.08E+05 | 9.16E+05 | 5.87E+05 | 5.58E+05 | 5.70E+05 |
| 5.85E+04 | 4.39E+04 | 3.69E+04 | 5.44E+04 | 3.32E+04 | 3.80E+04 | 4.49E+04 | 3.96E+04 | 3.86E+04 |
| 6.64E+05 | 6.64E+05 | 7.07E+05 | 7.76E+05 | 6.94E+05 | 6.73E+05 | 4.86E+05 | 5.05E+05 | 3.65E+05 |
| 1.51E+05 | 1.40E+05 | 2.46E+05 | 1.72E+05 | 2.09E+05 | 2.82E+05 | 3.49E+05 | 2.32E+05 | 2.49E+05 |
| 1.20E+05 | 1.37E+05 | 1.13E+05 | 1.44E+05 | 1.56E+05 | 7.93E+04 | 1.03E+05 | 9.55E+04 | 8.64E+04 |
| 4.71E+05 | 1.51E+05 | 2.86E+05 | 4.82E+05 | 3.79E+05 | 1.64E+05 | 4.84E+05 | 3.64E+05 | 3.71E+05 |
| 1.60E+05 | 1.92E+05 | 2.40E+05 | 2.08E+05 | 2.03E+05 | 1.62E+05 | 1.46E+05 | 1.47E+05 | 1.40E+05 |
| 3.87E+05 | 3.65E+05 | 4.78E+05 | 5.50E+05 | 2.69E+05 | 2.38E+05 | 1.70E+05 | 2.20E+05 | 2.09E+05 |
| 1.28E+06 | 1.20E+06 | 1.55E+06 | 1.64E+06 | 1.03E+06 | 1.34E+06 | 1.05E+06 | 1.06E+06 | 1.14E+06 |
| 2.43E+05 | 8.04E+04 | 4.44E+04 | 1.70E+05 | 2.03E+05 | 1.69E+05 | 1.47E+05 | 1.41E+05 | 1.27E+05 |
| 1.28E+05 | 1.10E+05 | 1.57E+05 | 1.72E+05 | 1.06E+05 | 9.97E+04 | 5.21E+04 | 6.39E+04 | 5.04E+04 |
| 1.67E+05 | 1.13E+05 | 1.03E+05 | 9.94E+04 | 6.37E+04 | 1.78E+05 | 1.07E+05 | 1.40E+05 | 1.39E+05 |
| 1.01E+05 | 8.39E+04 | 1.11E+05 | 1.54E+05 | 9.32E+04 | 7.26E+04 | 3.88E+04 | 3.76E+04 | 4.33E+04 |
| 8.03E+04 | 7.24E+04 | 7.21E+04 | 4.62E+04 | 9.55E+04 | 6.78E+04 | 1.52E+04 | 2.78E+04 | 3.21E+04 |

|          |          |          |          |          |          |          |          |          |
|----------|----------|----------|----------|----------|----------|----------|----------|----------|
| 1.25E+04 | 5.25E+04 | 6.20E+04 | 4.37E+04 | 4.54E+04 | 4.72E+04 | 2.95E+04 | 3.24E+04 | 1.91E+04 |
| 9.00E+00 | 9.00E+00 | 7.60E+04 | 9.00E+00 | 9.00E+00 | 9.00E+00 | 1.52E+05 | 1.30E+05 | 1.82E+05 |
| 1.64E+05 | 1.40E+05 | 1.60E+05 | 1.40E+05 | 1.94E+05 | 1.52E+05 | 1.52E+06 | 1.39E+06 | 1.37E+06 |
| 2.24E+05 | 2.03E+05 | 2.16E+05 | 2.09E+05 | 2.39E+05 | 2.32E+05 | 1.13E+05 | 1.14E+05 | 1.22E+05 |
| 5.67E+05 | 4.92E+05 | 6.13E+05 | 4.64E+05 | 4.93E+05 | 5.79E+05 | 5.58E+05 | 5.20E+05 | 5.58E+05 |
| 1.03E+05 | 6.84E+04 | 8.91E+04 | 9.28E+04 | 7.67E+04 | 7.39E+04 | 7.69E+04 | 1.11E+05 | 6.87E+04 |
| 9.61E+04 | 9.14E+04 | 1.24E+05 | 8.45E+04 | 8.21E+04 | 1.07E+05 | 9.96E+04 | 1.03E+05 | 9.91E+04 |
| 1.35E+05 | 1.13E+05 | 1.74E+05 | 1.48E+05 | 1.52E+05 | 1.98E+05 | 1.79E+05 | 1.66E+05 | 1.79E+05 |
| 1.10E+05 | 1.13E+05 | 1.38E+05 | 1.26E+05 | 6.88E+04 | 1.19E+05 | 1.08E+05 | 8.91E+04 | 9.03E+04 |
| 5.60E+05 | 6.33E+05 | 5.09E+05 | 4.76E+05 | 6.21E+05 | 5.56E+05 | 2.86E+05 | 2.39E+05 | 2.82E+05 |
| 2.25E+05 | 2.22E+05 | 2.90E+05 | 2.46E+05 | 1.76E+05 | 1.58E+05 | 9.74E+04 | 1.03E+05 | 1.26E+05 |
| 8.99E+05 | 9.71E+05 | 1.05E+06 | 9.13E+05 | 1.14E+06 | 9.49E+05 | 7.62E+05 | 8.19E+05 | 7.31E+05 |
| 3.93E+05 | 3.12E+05 | 3.44E+05 | 3.81E+05 | 2.24E+05 | 2.31E+05 | 1.78E+05 | 1.98E+05 | 1.78E+05 |
| 1.15E+06 | 1.24E+06 | 1.55E+06 | 1.42E+06 | 1.13E+06 | 1.11E+06 | 1.01E+06 | 1.05E+06 | 1.05E+06 |
| 3.11E+05 | 2.55E+05 | 2.88E+05 | 2.67E+05 | 2.91E+05 | 2.64E+05 | 3.16E+05 | 3.08E+05 | 3.08E+05 |
| 2.36E+04 | 1.46E+04 | 3.06E+04 | 2.65E+04 | 2.53E+04 | 8.78E+03 | 6.66E+05 | 7.26E+05 | 6.31E+05 |
| 1.07E+05 | 1.10E+05 | 1.22E+05 | 1.47E+05 | 1.30E+05 | 2.38E+05 | 3.90E+04 | 4.22E+04 | 3.70E+04 |
| 8.62E+04 | 7.87E+04 | 1.09E+05 | 1.32E+05 | 1.34E+05 | 1.65E+05 | 4.50E+04 | 3.44E+04 | 4.20E+04 |
| 7.66E+03 | 1.86E+04 | 2.40E+04 | 2.06E+04 | 4.43E+04 | 2.80E+04 | 1.39E+04 | 1.63E+04 | 1.22E+04 |
| 3.78E+04 | 1.02E+05 | 4.26E+04 | 2.93E+04 | 5.85E+04 | 3.76E+04 | 2.14E+07 | 1.71E+07 | 1.65E+07 |
| 9.60E+05 | 1.03E+06 | 1.45E+06 | 1.20E+06 | 1.15E+06 | 9.76E+05 | 6.91E+06 | 6.71E+06 | 6.69E+06 |
| 1.11E+05 | 7.55E+04 | 1.19E+05 | 1.33E+05 | 1.10E+05 | 6.79E+04 | 7.98E+04 | 1.08E+05 | 9.15E+04 |
| 2.66E+05 | 2.84E+05 | 3.73E+05 | 3.57E+05 | 3.54E+05 | 3.54E+05 | 3.94E+05 | 4.16E+05 | 3.46E+05 |
| 5.59E+06 | 5.89E+06 | 7.38E+06 | 7.10E+06 | 6.59E+06 | 5.37E+06 | 2.22E+07 | 2.32E+07 | 2.22E+07 |
| 1.10E+06 | 9.82E+05 | 1.21E+06 | 1.37E+06 | 1.12E+06 | 1.05E+06 | 2.00E+06 | 1.77E+06 | 1.93E+06 |
| 3.00E+06 | 3.25E+06 | 3.45E+06 | 3.94E+06 | 2.90E+06 | 2.98E+06 | 2.68E+06 | 2.62E+06 | 2.69E+06 |
| 2.69E+04 | 1.56E+04 | 2.31E+04 | 2.45E+04 | 2.95E+04 | 2.66E+04 | 2.75E+04 | 2.73E+04 | 2.44E+04 |
| 2.00E+04 | 2.83E+04 | 4.77E+04 | 2.98E+04 | 1.99E+04 | 2.39E+04 | 2.30E+04 | 3.65E+04 | 4.11E+04 |
| 1.05E+07 | 9.84E+06 | 1.25E+07 | 1.23E+07 | 1.24E+07 | 1.27E+07 | 1.14E+07 | 1.20E+07 | 1.11E+07 |
| 3.36E+06 | 3.73E+06 | 4.73E+06 | 4.35E+06 | 4.41E+06 | 4.36E+06 | 3.89E+06 | 3.80E+06 | 3.31E+06 |
| 6.45E+04 | 5.70E+04 | 1.15E+05 | 7.99E+04 | 8.89E+04 | 6.35E+04 | 6.10E+04 | 6.41E+04 | 5.58E+04 |
| 6.95E+06 | 6.16E+06 | 7.87E+06 | 5.85E+06 | 7.65E+06 | 6.95E+06 | 1.16E+07 | 1.20E+07 | 1.25E+07 |
| 1.46E+05 | 9.79E+04 | 1.69E+05 | 5.41E+04 | 1.16E+05 | 1.40E+05 | 1.67E+05 | 1.65E+05 | 1.91E+05 |
| 8.32E+05 | 7.71E+05 | 1.19E+06 | 9.73E+05 | 1.24E+06 | 8.12E+05 | 5.97E+06 | 5.07E+06 | 5.38E+06 |
| 3.40E+04 | 2.24E+04 | 4.25E+04 | 5.08E+04 | 3.61E+04 | 3.20E+04 | 5.66E+05 | 4.19E+05 | 4.88E+05 |
| 7.73E+06 | 6.76E+06 | 8.71E+06 | 8.57E+06 | 7.77E+06 | 7.65E+06 | 1.70E+07 | 1.70E+07 | 1.71E+07 |
| 2.41E+05 | 2.31E+05 | 2.47E+05 | 3.08E+05 | 2.33E+05 | 2.32E+05 | 1.54E+05 | 1.78E+05 | 1.50E+05 |
| 8.31E+05 | 6.12E+05 | 8.60E+05 | 7.96E+05 | 8.45E+05 | 7.59E+05 | 1.17E+06 | 1.09E+06 | 9.84E+05 |
| 1.56E+06 | 1.54E+06 | 1.85E+06 | 1.69E+06 | 1.65E+06 | 1.51E+06 | 3.10E+06 | 3.20E+06 | 3.12E+06 |
| 1.02E+07 | 9.55E+06 | 5.85E+06 | 9.93E+06 | 8.85E+06 | 9.72E+06 | 1.10E+07 | 1.10E+07 | 1.07E+07 |
| 6.99E+05 | 5.15E+05 | 7.97E+05 | 4.25E+05 | 6.32E+05 | 4.18E+05 | 3.88E+06 | 4.13E+06 | 4.01E+06 |
| 2.06E+06 | 1.99E+06 | 2.16E+06 | 2.21E+06 | 2.29E+06 | 1.18E+06 | 1.82E+06 | 1.59E+06 | 1.51E+06 |
| 4.88E+06 | 5.39E+06 | 5.47E+06 | 5.67E+06 | 5.76E+06 | 4.56E+06 | 7.04E+06 | 6.63E+06 | 6.15E+06 |
| 5.58E+07 | 5.45E+07 | 5.62E+07 | 6.10E+07 | 5.92E+07 | 5.18E+07 | 4.07E+07 | 3.99E+07 | 4.22E+07 |
| 4.87E+06 | 3.69E+06 | 4.21E+06 | 4.42E+06 | 4.19E+06 | 3.93E+06 | 3.11E+06 | 3.20E+06 | 3.13E+06 |
| 1.21E+06 | 1.28E+06 | 1.15E+06 | 1.23E+06 | 1.30E+06 | 1.19E+06 | 1.01E+06 | 8.26E+05 | 9.02E+05 |
| 2.56E+06 | 2.47E+06 | 2.90E+06 | 2.72E+06 | 2.88E+06 | 2.69E+06 | 3.37E+06 | 3.29E+06 | 3.31E+06 |
| 7.06E+06 | 5.75E+06 | 4.72E+06 | 7.08E+06 | 6.21E+06 | 6.38E+06 | 4.34E+06 | 4.66E+06 | 4.40E+06 |
| 2.17E+06 | 2.61E+06 | 3.19E+06 | 2.88E+06 | 2.48E+06 | 2.45E+06 | 1.82E+06 | 2.44E+06 | 2.60E+06 |
| 4.85E+05 | 5.01E+05 | 5.13E+05 | 6.37E+05 | 5.45E+05 | 4.80E+05 | 3.41E+05 | 3.33E+05 | 3.33E+05 |
| 7.47E+05 | 7.30E+05 | 8.07E+05 | 8.68E+05 | 6.87E+05 | 7.86E+05 | 8.00E+05 | 8.09E+05 | 7.37E+05 |
| 6.02E+04 | 6.00E+04 | 7.67E+04 | 7.21E+04 | 6.87E+04 | 5.43E+04 | 5.61E+04 | 6.21E+04 | 5.42E+04 |
| 1.13E+05 | 1.07E+05 | 1.80E+05 | 1.51E+05 | 2.00E+05 | 1.55E+05 | 2.18E+05 | 1.95E+05 | 2.13E+05 |
| 7.39E+04 | 1.26E+05 | 1.76E+05 | 1.02E+05 | 1.08E+05 | 1.66E+05 | 1.54E+05 | 1.78E+05 | 8.88E+04 |

|          |          |          |          |          |          |          |          |          |
|----------|----------|----------|----------|----------|----------|----------|----------|----------|
| 1.97E+06 | 2.24E+06 | 2.24E+06 | 2.55E+06 | 2.21E+06 | 2.05E+06 | 2.02E+06 | 1.92E+06 | 1.72E+06 |
| 2.36E+06 | 2.36E+06 | 3.03E+06 | 2.47E+06 | 2.69E+06 | 2.90E+06 | 3.29E+06 | 3.53E+06 | 3.07E+06 |
| 3.54E+05 | 3.37E+05 | 4.03E+05 | 3.99E+05 | 3.98E+05 | 4.48E+05 | 5.68E+05 | 5.91E+05 | 5.10E+05 |
| 4.54E+05 | 4.43E+05 | 4.43E+05 | 5.98E+05 | 6.46E+05 | 5.41E+05 | 8.31E+05 | 6.38E+05 | 8.10E+05 |
| 6.01E+07 | 5.70E+07 | 6.56E+07 | 6.26E+07 | 5.81E+07 | 5.18E+07 | 5.65E+07 | 5.50E+07 | 5.44E+07 |
| 7.05E+05 | 4.28E+05 | 4.61E+05 | 5.91E+05 | 4.54E+05 | 8.00E+05 | 2.83E+05 | 2.78E+05 | 2.72E+05 |
| 1.84E+05 | 1.91E+05 | 2.19E+05 | 2.15E+05 | 1.95E+05 | 1.84E+05 | 2.63E+05 | 2.82E+05 | 2.77E+05 |
| 5.87E+05 | 5.18E+05 | 5.07E+05 | 7.23E+05 | 5.96E+05 | 5.72E+05 | 3.74E+05 | 3.82E+05 | 3.46E+05 |
| 3.03E+06 | 3.33E+06 | 3.26E+06 | 3.06E+06 | 3.42E+06 | 3.38E+06 | 4.10E+06 | 3.92E+06 | 3.98E+06 |
| 1.18E+05 | 1.20E+05 | 1.32E+05 | 1.27E+05 | 1.44E+05 | 1.38E+05 | 1.56E+05 | 1.62E+05 | 1.57E+05 |
| 2.50E+05 | 2.06E+05 | 2.60E+05 | 2.87E+05 | 2.20E+05 | 2.17E+05 | 6.67E+05 | 6.36E+05 | 7.00E+05 |
| 2.83E+06 | 2.92E+06 | 3.29E+06 | 3.05E+06 | 3.42E+06 | 2.92E+06 | 9.99E+06 | 9.78E+06 | 9.92E+06 |
| 3.75E+05 | 3.47E+05 | 3.80E+05 | 3.29E+05 | 4.06E+05 | 2.75E+05 | 1.43E+06 | 1.45E+06 | 1.40E+06 |
| 4.03E+04 | 3.68E+04 | 3.56E+04 | 1.93E+04 | 2.87E+04 | 5.67E+04 | 3.10E+04 | 5.06E+04 | 5.26E+04 |
| 8.94E+04 | 7.35E+04 | 7.84E+04 | 7.55E+04 | 6.98E+04 | 8.07E+04 | 7.65E+04 | 9.28E+04 | 9.26E+04 |
| 4.89E+04 | 5.16E+04 | 2.45E+04 | 6.08E+04 | 4.60E+04 | 1.97E+04 | 3.01E+04 | 1.43E+04 | 2.07E+04 |
| 1.18E+05 | 1.25E+05 | 9.15E+04 | 1.19E+05 | 1.27E+05 | 1.28E+05 | 1.32E+05 | 1.40E+05 | 1.90E+05 |
| 1.57E+05 | 7.98E+04 | 5.94E+04 | 1.23E+05 | 8.93E+04 | 3.61E+04 | 6.74E+04 | 6.60E+04 | 4.45E+04 |
| 4.62E+05 | 3.69E+05 | 4.30E+05 | 5.90E+05 | 3.76E+05 | 3.45E+05 | 2.23E+05 | 2.75E+05 | 1.64E+05 |
| 6.22E+05 | 5.57E+05 | 4.93E+05 | 7.26E+05 | 7.13E+05 | 4.63E+05 | 3.08E+05 | 2.89E+05 | 3.00E+05 |
| 1.11E+05 | 1.36E+05 | 1.45E+05 | 2.41E+05 | 2.17E+05 | 1.51E+05 | 8.32E+04 | 8.25E+04 | 8.75E+04 |
| 5.53E+04 | 3.76E+04 | 2.36E+04 | 6.02E+04 | 8.14E+04 | 3.95E+04 | 4.18E+04 | 4.07E+04 | 3.30E+04 |
| 2.18E+05 | 1.57E+05 | 1.81E+05 | 2.09E+05 | 1.68E+05 | 2.12E+05 | 9.24E+04 | 1.08E+05 | 1.19E+05 |
| 1.46E+05 | 1.31E+05 | 9.70E+04 | 1.97E+05 | 1.32E+05 | 1.52E+05 | 2.01E+05 | 2.16E+05 | 2.30E+05 |
| 7.42E+04 | 8.60E+04 | 4.37E+04 | 9.15E+04 | 6.30E+04 | 5.67E+04 | 7.47E+04 | 8.07E+04 | 7.77E+04 |
| 3.91E+05 | 3.00E+05 | 2.94E+05 | 4.35E+05 | 2.16E+05 | 2.65E+05 | 3.42E+05 | 3.55E+05 | 3.00E+05 |
| 9.55E+04 | 9.34E+04 | 6.72E+04 | 1.41E+05 | 7.72E+04 | 7.53E+04 | 5.22E+04 | 1.02E+05 | 9.43E+04 |
| 9.20E+04 | 6.47E+04 | 2.17E+04 | 1.20E+05 | 6.80E+04 | 3.70E+04 | 1.02E+05 | 1.12E+05 | 1.15E+05 |
| 1.00E+05 | 6.52E+04 | 8.03E+04 | 1.09E+05 | 7.67E+04 | 4.95E+04 | 4.44E+04 | 5.13E+04 | 7.53E+04 |
| 8.72E+04 | 1.16E+05 | 8.38E+04 | 8.46E+04 | 9.79E+04 | 6.18E+04 | 1.98E+05 | 1.89E+05 | 1.49E+05 |
| 3.42E+05 | 2.34E+05 | 2.45E+05 | 4.39E+05 | 2.31E+05 | 2.43E+05 | 2.00E+05 | 3.20E+05 | 3.09E+05 |
| 9.49E+05 | 7.85E+05 | 7.37E+05 | 1.27E+06 | 5.90E+05 | 5.10E+05 | 5.57E+05 | 5.66E+05 | 5.55E+05 |
| 1.16E+06 | 1.07E+06 | 8.03E+05 | 1.65E+06 | 8.32E+05 | 7.27E+05 | 5.23E+05 | 5.31E+05 | 5.41E+05 |
| 1.10E+06 | 9.77E+05 | 4.94E+05 | 1.41E+06 | 7.08E+05 | 6.08E+05 | 3.41E+05 | 2.04E+05 | 2.59E+05 |
| 6.32E+05 | 5.15E+05 | 5.80E+05 | 1.25E+06 | 8.87E+05 | 6.07E+05 | 3.05E+05 | 2.44E+05 | 2.55E+05 |
| 4.97E+05 | 3.46E+05 | 3.23E+05 | 7.22E+05 | 5.30E+05 | 4.57E+05 | 2.39E+05 | 2.17E+05 | 2.11E+05 |
| 1.31E+05 | 1.11E+05 | 1.12E+05 | 2.81E+05 | 1.41E+05 | 1.64E+05 | 6.80E+04 | 7.87E+04 | 6.95E+04 |
| 2.02E+06 | 1.96E+06 | 1.03E+06 | 3.07E+06 | 2.27E+06 | 1.71E+06 | 5.37E+05 | 5.60E+05 | 5.41E+05 |
| 3.05E+05 | 3.24E+05 | 1.66E+05 | 6.04E+05 | 2.92E+05 | 3.34E+05 | 1.15E+05 | 1.34E+05 | 1.40E+05 |
| 7.71E+04 | 5.19E+04 | 4.26E+04 | 1.60E+05 | 1.22E+05 | 8.78E+04 | 3.77E+04 | 3.68E+04 | 4.38E+04 |
| 1.12E+05 | 4.85E+04 | 1.49E+05 | 1.05E+05 | 1.47E+05 | 1.35E+05 | 1.34E+05 | 1.57E+05 | 2.08E+05 |
| 1.35E+05 | 1.64E+05 | 1.54E+05 | 2.06E+05 | 1.69E+05 | 9.80E+04 | 6.93E+04 | 8.35E+04 | 5.06E+04 |
| 1.34E+05 | 1.20E+05 | 5.68E+04 | 1.35E+05 | 3.71E+04 | 1.19E+05 | 5.20E+04 | 4.95E+04 | 3.44E+04 |
| 4.33E+05 | 2.97E+05 | 2.58E+05 | 4.27E+05 | 3.30E+05 | 2.69E+05 | 8.98E+04 | 1.17E+05 | 1.11E+05 |
| 2.54E+05 | 2.12E+05 | 1.37E+05 | 2.49E+05 | 2.33E+05 | 1.57E+05 | 5.22E+04 | 8.27E+04 | 6.35E+04 |
| 4.29E+05 | 4.16E+05 | 3.58E+05 | 4.08E+05 | 3.07E+05 | 2.97E+05 | 7.68E+05 | 7.79E+05 | 6.89E+05 |
| 4.36E+05 | 3.85E+05 | 2.53E+05 | 4.20E+05 | 2.18E+05 | 2.54E+05 | 3.08E+05 | 2.76E+05 | 3.18E+05 |
| 5.11E+04 | 4.55E+04 | 5.07E+04 | 5.89E+04 | 6.71E+04 | 6.87E+04 | 6.23E+04 | 8.53E+04 | 7.53E+04 |
| 5.80E+05 | 4.54E+05 | 3.73E+05 | 7.92E+05 | 3.25E+05 | 3.62E+05 | 2.67E+05 | 2.72E+05 | 2.54E+05 |
| 2.23E+05 | 2.10E+05 | 2.57E+05 | 2.20E+05 | 1.99E+05 | 2.30E+05 | 2.62E+05 | 2.93E+05 | 3.04E+05 |
| 9.95E+04 | 8.62E+04 | 2.96E+04 | 7.77E+04 | 7.38E+04 | 6.61E+04 | 1.11E+05 | 1.06E+05 | 8.75E+04 |
| 1.21E+06 | 1.17E+06 | 8.72E+05 | 1.21E+06 | 6.92E+05 | 7.07E+05 | 2.18E+06 | 2.31E+06 | 2.08E+06 |
| 2.18E+05 | 1.83E+05 | 1.82E+05 | 2.13E+05 | 1.27E+05 | 1.59E+05 | 9.32E+04 | 1.30E+05 | 1.11E+05 |
| 2.17E+05 | 1.72E+05 | 1.61E+05 | 2.60E+05 | 1.63E+05 | 1.54E+05 | 9.99E+04 | 9.02E+04 | 1.10E+05 |

|          |          |          |          |          |          |          |          |          |
|----------|----------|----------|----------|----------|----------|----------|----------|----------|
| 2.33E+06 | 2.15E+06 | 1.50E+06 | 2.28E+06 | 1.44E+06 | 1.26E+06 | 4.17E+06 | 4.08E+06 | 4.28E+06 |
| 3.38E+06 | 2.55E+06 | 1.56E+06 | 3.49E+06 | 1.16E+06 | 9.89E+05 | 2.22E+06 | 1.97E+06 | 2.04E+06 |
| 6.81E+05 | 5.75E+05 | 3.39E+05 | 5.80E+05 | 4.88E+05 | 3.22E+05 | 5.91E+05 | 6.19E+05 | 5.63E+05 |
| 1.21E+07 | 1.05E+07 | 6.82E+06 | 1.18E+07 | 5.64E+06 | 5.10E+06 | 5.42E+06 | 5.20E+06 | 5.42E+06 |
| 1.00E+07 | 9.03E+06 | 7.58E+06 | 1.00E+07 | 5.83E+06 | 6.74E+06 | 4.60E+06 | 4.58E+06 | 4.56E+06 |
| 1.39E+06 | 1.33E+06 | 1.24E+06 | 1.84E+06 | 1.00E+06 | 8.45E+05 | 4.28E+05 | 4.27E+05 | 4.05E+05 |
| 1.74E+06 | 1.59E+06 | 9.66E+05 | 2.10E+06 | 1.36E+06 | 1.11E+06 | 4.92E+05 | 5.50E+05 | 4.72E+05 |
| 1.84E+05 | 1.33E+05 | 1.46E+05 | 1.28E+05 | 1.01E+05 | 6.20E+04 | 9.23E+04 | 9.62E+04 | 5.73E+04 |
| 9.88E+06 | 7.69E+06 | 5.49E+06 | 9.93E+06 | 3.60E+06 | 3.72E+06 | 3.23E+06 | 3.34E+06 | 3.38E+06 |
| 5.23E+06 | 4.37E+06 | 3.30E+06 | 5.89E+06 | 2.42E+06 | 2.40E+06 | 1.66E+06 | 1.49E+06 | 1.56E+06 |
| 7.01E+05 | 4.98E+05 | 3.33E+05 | 1.02E+06 | 3.30E+05 | 3.99E+05 | 2.07E+05 | 2.01E+05 | 1.62E+05 |
| 7.98E+05 | 5.55E+05 | 6.19E+05 | 1.00E+06 | 6.07E+05 | 6.41E+05 | 2.15E+05 | 2.24E+05 | 2.16E+05 |
| 1.85E+05 | 1.48E+05 | 8.87E+04 | 2.26E+05 | 9.54E+04 | 9.29E+04 | 6.11E+04 | 4.28E+04 | 3.73E+04 |
| 2.35E+05 | 2.37E+05 | 1.82E+05 | 2.51E+05 | 1.14E+05 | 1.26E+05 | 8.46E+04 | 9.63E+04 | 6.78E+04 |
| 1.41E+05 | 1.56E+05 | 1.01E+05 | 2.34E+05 | 1.54E+05 | 1.76E+05 | 5.90E+04 | 6.86E+04 | 5.29E+04 |
| 1.55E+06 | 1.32E+06 | 1.00E+06 | 1.49E+06 | 9.55E+05 | 7.91E+05 | 8.42E+05 | 7.43E+05 | 8.95E+05 |
| 5.50E+06 | 5.04E+06 | 3.92E+06 | 5.74E+06 | 2.56E+06 | 2.67E+06 | 1.89E+06 | 2.07E+06 | 1.77E+06 |
| 1.69E+05 | 1.78E+05 | 1.35E+05 | 2.07E+05 | 1.54E+05 | 1.40E+05 | 9.69E+04 | 1.05E+05 | 8.88E+04 |
| 6.02E+05 | 4.37E+05 | 4.12E+05 | 4.38E+05 | 2.23E+05 | 3.56E+05 | 2.35E+05 | 2.00E+05 | 1.89E+05 |
| 8.37E+05 | 7.15E+05 | 6.09E+05 | 8.63E+05 | 5.11E+05 | 5.31E+05 | 3.16E+05 | 3.24E+05 | 3.48E+05 |
| 1.03E+07 | 8.77E+06 | 6.77E+06 | 1.22E+07 | 7.68E+06 | 6.62E+06 | 3.56E+06 | 3.37E+06 | 3.31E+06 |
| 1.82E+06 | 1.82E+06 | 9.65E+05 | 2.26E+06 | 1.42E+06 | 1.35E+06 | 5.02E+05 | 5.44E+05 | 5.39E+05 |
| 2.35E+05 | 2.68E+05 | 9.78E+04 | 3.37E+05 | 1.73E+05 | 9.11E+04 | 6.47E+04 | 5.99E+04 | 8.66E+04 |
| 5.74E+05 | 5.10E+05 | 2.70E+05 | 7.42E+05 | 4.77E+05 | 2.78E+05 | 1.65E+05 | 1.81E+05 | 1.05E+05 |
| 1.38E+08 | 1.47E+08 | 1.13E+08 | 1.76E+08 | 1.82E+08 | 1.74E+08 | 7.56E+07 | 6.75E+07 | 6.75E+07 |
| 3.46E+05 | 3.71E+05 | 2.76E+05 | 4.88E+05 | 6.18E+05 | 3.69E+05 | 1.29E+05 | 8.07E+04 | 9.42E+04 |
| 1.37E+05 | 1.01E+05 | 7.41E+04 | 1.64E+05 | 2.08E+05 | 1.05E+05 | 2.14E+04 | 4.46E+04 | 2.93E+04 |
| 3.14E+05 | 3.06E+05 | 1.52E+05 | 4.14E+05 | 4.01E+05 | 2.96E+05 | 7.98E+04 | 1.42E+05 | 1.00E+05 |
| 1.83E+06 | 1.50E+06 | 1.24E+06 | 2.91E+06 | 1.09E+06 | 1.28E+06 | 8.09E+05 | 7.84E+05 | 7.61E+05 |
| 2.36E+05 | 1.24E+05 | 1.40E+05 | 2.59E+05 | 1.28E+05 | 9.78E+04 | 8.18E+04 | 6.14E+04 | 8.53E+04 |
| 9.13E+06 | 7.27E+06 | 4.73E+06 | 1.04E+07 | 3.50E+06 | 3.55E+06 | 2.62E+06 | 2.63E+06 | 2.53E+06 |
| 5.19E+05 | 3.83E+05 | 2.89E+05 | 6.97E+05 | 3.20E+05 | 2.95E+05 | 1.70E+05 | 1.13E+05 | 1.24E+05 |
| 2.78E+05 | 2.54E+05 | 1.91E+05 | 3.67E+05 | 4.11E+05 | 2.85E+05 | 1.26E+05 | 7.53E+04 | 8.42E+04 |
| 5.11E+05 | 4.21E+05 | 2.61E+05 | 7.08E+05 | 3.51E+05 | 5.25E+05 | 1.87E+05 | 1.57E+05 | 1.50E+05 |
| 7.30E+04 | 1.69E+05 | 7.59E+04 | 2.62E+05 | 1.72E+05 | 9.35E+04 | 6.02E+04 | 2.01E+04 | 4.79E+04 |
| 2.36E+05 | 2.09E+05 | 1.89E+05 | 3.43E+05 | 2.29E+05 | 2.32E+05 | 7.94E+04 | 7.82E+04 | 9.93E+04 |
| 1.06E+06 | 9.83E+05 | 7.26E+05 | 9.26E+05 | 7.54E+05 | 6.91E+05 | 7.52E+05 | 7.64E+05 | 6.24E+05 |
| 7.59E+05 | 5.73E+05 | 4.69E+05 | 8.18E+05 | 2.96E+05 | 3.37E+05 | 3.53E+05 | 3.58E+05 | 3.84E+05 |
| 1.45E+05 | 8.43E+04 | 6.82E+04 | 9.68E+04 | 8.50E+04 | 3.69E+04 | 2.74E+04 | 4.98E+04 | 4.43E+04 |
| 2.95E+06 | 2.85E+06 | 1.94E+06 | 2.81E+06 | 1.49E+06 | 1.52E+06 | 7.95E+05 | 7.74E+05 | 8.54E+05 |
| 1.54E+06 | 1.67E+06 | 1.27E+06 | 1.44E+06 | 1.23E+06 | 1.17E+06 | 5.34E+05 | 7.17E+05 | 6.42E+05 |
| 1.60E+04 | 1.56E+04 | 1.73E+04 | 1.89E+04 | 1.66E+04 | 1.77E+04 | 7.07E+03 | 5.78E+03 | 4.43E+03 |
| 2.15E+05 | 2.06E+05 | 1.31E+05 | 2.08E+05 | 8.60E+04 | 1.35E+05 | 1.28E+05 | 1.24E+05 | 1.17E+05 |
| 2.74E+06 | 2.68E+06 | 1.80E+06 | 2.83E+06 | 1.52E+06 | 1.65E+06 | 1.12E+06 | 9.84E+05 | 9.80E+05 |
| 1.00E+06 | 9.39E+05 | 6.71E+05 | 1.04E+06 | 5.36E+05 | 5.69E+05 | 2.92E+05 | 3.53E+05 | 3.77E+05 |
| 2.36E+05 | 1.38E+05 | 1.61E+05 | 2.21E+05 | 9.25E+04 | 7.39E+04 | 6.00E+04 | 5.23E+04 | 5.71E+04 |
| 4.68E+05 | 3.79E+05 | 2.38E+05 | 5.65E+05 | 3.56E+05 | 3.60E+05 | 1.27E+05 | 1.00E+05 | 1.23E+05 |
| 7.08E+06 | 6.27E+06 | 5.12E+06 | 6.94E+06 | 3.52E+06 | 4.06E+06 | 1.82E+06 | 1.51E+06 | 1.59E+06 |
| 6.66E+05 | 5.62E+05 | 3.86E+05 | 6.49E+05 | 3.13E+05 | 3.35E+05 | 1.68E+05 | 1.41E+05 | 1.65E+05 |
| 6.80E+06 | 6.86E+06 | 4.88E+06 | 7.81E+06 | 4.21E+06 | 5.12E+06 | 2.35E+06 | 2.12E+06 | 2.33E+06 |
| 1.26E+06 | 8.87E+05 | 9.68E+05 | 9.59E+05 | 5.65E+05 | 6.40E+05 | 4.57E+05 | 3.88E+05 | 4.15E+05 |
| 6.62E+04 | 8.31E+04 | 4.97E+04 | 7.71E+04 | 6.47E+04 | 5.66E+04 | 2.12E+04 | 3.19E+04 | 2.67E+04 |
| 1.27E+06 | 1.15E+06 | 1.26E+06 | 1.71E+06 | 7.82E+05 | 1.27E+06 | 3.35E+05 | 2.99E+05 | 3.04E+05 |
| 4.10E+06 | 3.82E+06 | 2.05E+06 | 3.96E+06 | 3.22E+06 | 3.32E+06 | 1.24E+06 | 1.31E+06 | 1.10E+06 |

|          |          |          |          |          |          |          |          |          |
|----------|----------|----------|----------|----------|----------|----------|----------|----------|
| 4.24E+06 | 4.39E+06 | 2.96E+06 | 4.83E+06 | 3.07E+06 | 3.80E+06 | 1.27E+06 | 1.54E+06 | 1.59E+06 |
| 4.01E+05 | 4.02E+05 | 2.39E+05 | 5.50E+05 | 2.71E+05 | 3.00E+05 | 1.57E+05 | 1.08E+05 | 1.41E+05 |
| 2.55E+05 | 2.92E+05 | 1.66E+05 | 4.08E+05 | 3.13E+05 | 3.31E+05 | 1.04E+05 | 1.05E+05 | 1.26E+05 |
| 1.01E+06 | 1.02E+06 | 5.64E+05 | 1.05E+06 | 4.92E+05 | 6.06E+05 | 2.54E+05 | 2.98E+05 | 2.72E+05 |
| 2.99E+05 | 2.87E+05 | 1.84E+05 | 2.09E+05 | 1.38E+05 | 1.18E+05 | 1.18E+05 | 9.49E+04 | 1.20E+05 |
| 4.63E+05 | 3.96E+05 | 2.81E+05 | 4.37E+05 | 2.48E+05 | 2.81E+05 | 1.39E+05 | 1.50E+05 | 1.71E+05 |
| 9.00E+00 | 9.00E+00 | 9.00E+00 | 9.00E+00 | 9.00E+00 | 9.00E+00 | 1.18E+05 | 1.22E+05 | 1.09E+05 |
| 1.77E+05 | 1.64E+05 | 1.14E+05 | 2.79E+05 | 3.07E+05 | 2.06E+05 | 9.17E+04 | 9.30E+04 | 1.10E+05 |
| 3.44E+06 | 2.56E+06 | 2.11E+06 | 3.94E+06 | 2.20E+06 | 2.44E+06 | 1.15E+06 | 1.08E+06 | 8.74E+05 |
| 4.42E+05 | 4.09E+05 | 2.29E+05 | 4.88E+05 | 1.68E+05 | 2.66E+05 | 1.55E+05 | 1.26E+05 | 1.37E+05 |
| 2.42E+07 | 2.17E+07 | 1.87E+07 | 2.44E+07 | 1.75E+07 | 1.49E+07 | 2.89E+07 | 2.93E+07 | 2.91E+07 |
| 4.38E+07 | 3.06E+07 | 2.39E+07 | 3.83E+07 | 1.75E+07 | 1.47E+07 | 2.03E+07 | 1.98E+07 | 2.00E+07 |
| 8.59E+05 | 8.69E+05 | 8.36E+05 | 9.55E+05 | 6.24E+05 | 4.48E+05 | 2.66E+05 | 3.55E+05 | 2.79E+05 |
| 1.78E+07 | 1.68E+07 | 1.13E+07 | 1.54E+07 | 1.40E+07 | 1.04E+07 | 1.03E+07 | 1.08E+07 | 1.07E+07 |
| 3.26E+07 | 2.83E+07 | 1.86E+07 | 2.93E+07 | 1.71E+07 | 1.91E+07 | 1.19E+07 | 1.23E+07 | 1.26E+07 |
| 1.45E+06 | 1.53E+06 | 1.31E+06 | 1.86E+06 | 1.08E+06 | 1.07E+06 | 5.39E+05 | 6.08E+05 | 6.14E+05 |
| 1.19E+07 | 9.86E+06 | 8.78E+06 | 1.17E+07 | 1.06E+07 | 7.50E+06 | 4.05E+06 | 4.35E+06 | 4.14E+06 |
| 2.04E+07 | 2.13E+07 | 1.82E+07 | 2.81E+07 | 2.51E+07 | 1.90E+07 | 1.02E+07 | 9.18E+06 | 8.31E+06 |
| 7.34E+03 | 5.80E+03 | 3.87E+03 | 6.50E+03 | 8.45E+03 | 5.86E+03 | 4.70E+03 | 2.85E+03 | 3.78E+03 |
| 3.02E+07 | 2.12E+07 | 1.82E+07 | 2.86E+07 | 1.11E+07 | 1.11E+07 | 1.01E+07 | 1.05E+07 | 1.07E+07 |
| 2.14E+06 | 1.70E+06 | 1.14E+06 | 1.81E+06 | 6.07E+05 | 6.48E+05 | 5.64E+05 | 6.07E+05 | 6.33E+05 |
| 4.06E+07 | 3.60E+07 | 2.80E+07 | 4.22E+07 | 1.81E+07 | 1.84E+07 | 1.25E+07 | 1.27E+07 | 1.26E+07 |
| 1.01E+08 | 8.26E+07 | 6.64E+07 | 1.08E+08 | 5.42E+07 | 5.00E+07 | 3.64E+07 | 3.58E+07 | 3.70E+07 |
| 1.40E+07 | 1.00E+07 | 6.30E+06 | 1.30E+07 | 5.42E+06 | 5.59E+06 | 3.38E+06 | 2.87E+06 | 3.16E+06 |
| 1.05E+06 | 8.25E+05 | 4.02E+05 | 1.36E+06 | 5.01E+05 | 3.79E+05 | 2.15E+05 | 2.51E+05 | 2.48E+05 |
| 2.44E+05 | 2.16E+05 | 1.30E+05 | 2.21E+05 | 1.09E+05 | 8.95E+04 | 6.88E+04 | 5.61E+04 | 6.44E+04 |
| 1.44E+08 | 1.34E+08 | 1.01E+08 | 1.41E+08 | 7.82E+07 | 8.51E+07 | 5.39E+07 | 4.88E+07 | 4.98E+07 |
| 1.43E+07 | 1.17E+07 | 1.06E+07 | 1.65E+07 | 8.64E+06 | 7.61E+06 | 3.72E+06 | 3.94E+06 | 3.45E+06 |
| 5.58E+06 | 4.80E+06 | 2.74E+06 | 6.04E+06 | 2.92E+06 | 1.92E+06 | 1.37E+06 | 1.24E+06 | 1.24E+06 |
| 1.09E+05 | 8.30E+04 | 6.43E+04 | 1.27E+05 | 6.26E+04 | 5.09E+04 | 2.55E+04 | 3.20E+04 | 3.55E+04 |
| 7.40E+06 | 6.37E+06 | 5.92E+06 | 8.92E+06 | 5.63E+06 | 2.47E+06 | 2.36E+06 | 9.94E+05 | 2.28E+06 |
| 3.73E+07 | 2.89E+07 | 2.08E+07 | 4.15E+07 | 3.45E+07 | 2.27E+07 | 1.11E+07 | 1.04E+07 | 1.14E+07 |
| 2.61E+06 | 2.18E+06 | 1.29E+06 | 3.97E+06 | 1.90E+06 | 1.46E+06 | 6.83E+05 | 8.27E+05 | 5.99E+05 |
| 2.15E+05 | 2.21E+05 | 1.07E+05 | 1.58E+05 | 1.61E+05 | 1.31E+05 | 9.72E+04 | 7.30E+04 | 9.70E+04 |
| 7.19E+06 | 7.56E+06 | 4.33E+06 | 6.49E+06 | 3.90E+06 | 3.17E+06 | 1.12E+06 | 1.21E+06 | 1.14E+06 |
| 4.13E+05 | 2.51E+05 | 3.15E+05 | 2.60E+05 | 1.95E+05 | 2.73E+05 | 1.33E+05 | 1.27E+05 | 9.14E+04 |
| 2.23E+06 | 1.77E+06 | 1.25E+06 | 2.03E+06 | 1.44E+06 | 1.34E+06 | 6.78E+05 | 7.11E+05 | 6.11E+05 |
| 2.73E+07 | 2.48E+07 | 1.54E+07 | 2.35E+07 | 1.13E+07 | 1.31E+07 | 6.53E+06 | 5.81E+06 | 5.60E+06 |
| 9.95E+06 | 1.05E+07 | 7.02E+06 | 1.10E+07 | 5.05E+06 | 6.01E+06 | 2.92E+06 | 3.25E+06 | 3.15E+06 |
| 6.24E+05 | 5.49E+05 | 3.80E+05 | 5.73E+05 | 3.50E+05 | 9.02E+04 | 1.41E+05 | 1.48E+05 | 1.69E+05 |
| 3.68E+06 | 3.38E+06 | 2.30E+06 | 3.99E+06 | 2.90E+06 | 3.05E+06 | 1.10E+06 | 9.80E+05 | 1.05E+06 |
| 7.66E+05 | 6.24E+05 | 7.18E+05 | 6.95E+05 | 3.35E+05 | 5.05E+05 | 2.83E+05 | 2.54E+05 | 3.11E+05 |
| 3.07E+06 | 3.38E+06 | 2.67E+06 | 3.10E+06 | 3.49E+06 | 2.87E+06 | 2.17E+06 | 2.30E+06 | 2.30E+06 |
| 7.18E+07 | 6.32E+07 | 4.49E+07 | 6.15E+07 | 4.81E+07 | 3.57E+07 | 1.86E+07 | 1.98E+07 | 1.74E+07 |
| 5.00E+07 | 4.64E+07 | 3.68E+07 | 5.08E+07 | 4.31E+07 | 3.32E+07 | 1.81E+07 | 1.84E+07 | 1.80E+07 |
| 2.29E+04 | 2.37E+04 | 2.61E+04 | 2.92E+04 | 2.66E+04 | 2.77E+04 | 2.25E+04 | 2.09E+04 | 2.12E+04 |
| 5.13E+05 | 5.39E+05 | 4.71E+05 | 6.36E+05 | 4.55E+05 | 3.36E+05 | 1.88E+05 | 2.52E+05 | 1.82E+05 |
| 3.28E+06 | 3.21E+06 | 3.14E+06 | 3.67E+06 | 3.69E+06 | 3.06E+06 | 1.44E+06 | 1.29E+06 | 1.39E+06 |
| 9.55E+03 | 1.21E+04 | 9.77E+03 | 1.36E+04 | 9.87E+03 | 1.23E+04 | 1.10E+04 | 1.31E+04 | 1.24E+04 |
| 2.08E+07 | 1.99E+07 | 1.12E+07 | 1.96E+07 | 2.22E+07 | 1.74E+07 | 7.60E+06 | 8.02E+06 | 7.35E+06 |
| 2.10E+08 | 1.87E+08 | 1.52E+08 | 2.10E+08 | 1.21E+08 | 1.36E+08 | 8.19E+07 | 8.09E+07 | 8.28E+07 |
| 2.69E+08 | 2.68E+08 | 1.98E+08 | 2.94E+08 | 2.16E+08 | 2.18E+08 | 1.37E+08 | 1.36E+08 | 1.32E+08 |
| 9.68E+06 | 8.12E+06 | 5.80E+06 | 9.27E+06 | 4.19E+06 | 5.27E+06 | 1.77E+06 | 1.54E+06 | 1.37E+06 |
| 3.14E+07 | 2.88E+07 | 1.84E+07 | 3.38E+07 | 1.68E+07 | 1.83E+07 | 7.84E+06 | 8.03E+06 | 7.34E+06 |

|          |          |          |          |          |          |          |          |          |
|----------|----------|----------|----------|----------|----------|----------|----------|----------|
| 1.75E+07 | 1.61E+07 | 1.22E+07 | 1.79E+07 | 1.03E+07 | 1.04E+07 | 6.00E+06 | 5.72E+06 | 5.94E+06 |
| 9.64E+07 | 9.73E+07 | 7.71E+07 | 9.72E+07 | 7.03E+07 | 6.40E+07 | 3.04E+07 | 3.05E+07 | 2.99E+07 |
| 6.56E+04 | 7.71E+04 | 7.63E+04 | 9.96E+04 | 7.08E+04 | 6.25E+04 | 3.66E+04 | 3.34E+04 | 3.54E+04 |
| 4.74E+05 | 4.54E+05 | 3.67E+05 | 5.93E+05 | 3.24E+05 | 3.34E+05 | 1.10E+05 | 1.24E+05 | 1.25E+05 |
| 2.32E+06 | 2.53E+06 | 1.46E+06 | 2.41E+06 | 1.44E+06 | 1.50E+06 | 5.36E+05 | 5.35E+05 | 4.98E+05 |
| 1.43E+07 | 1.48E+07 | 9.28E+06 | 1.49E+07 | 1.14E+07 | 9.67E+06 | 3.51E+06 | 3.39E+06 | 3.75E+06 |
| 2.77E+07 | 2.89E+07 | 1.45E+07 | 3.35E+07 | 2.66E+07 | 2.07E+07 | 8.43E+06 | 7.80E+06 | 8.49E+06 |
| 1.68E+08 | 1.63E+08 | 1.12E+08 | 1.70E+08 | 1.94E+08 | 1.45E+08 | 6.86E+07 | 6.74E+07 | 6.02E+07 |
| 6.49E+04 | 7.39E+04 | 6.35E+04 | 1.04E+05 | 7.59E+04 | 6.32E+04 | 2.90E+04 | 3.23E+04 | 2.52E+04 |
| 1.79E+05 | 1.89E+05 | 1.98E+05 | 2.63E+05 | 1.89E+05 | 2.01E+05 | 5.52E+04 | 4.12E+04 | 2.18E+04 |
| 2.23E+05 | 2.05E+05 | 1.69E+05 | 3.71E+05 | 2.93E+05 | 2.02E+05 | 7.61E+04 | 8.85E+04 | 6.72E+04 |
| 1.01E+08 | 1.23E+08 | 8.76E+07 | 1.47E+08 | 9.25E+07 | 1.01E+08 | 5.36E+07 | 4.89E+07 | 5.04E+07 |
| 4.07E+07 | 3.97E+07 | 2.23E+07 | 4.22E+07 | 3.02E+07 | 2.54E+07 | 1.44E+07 | 1.20E+07 | 1.30E+07 |
| 5.45E+06 | 6.75E+06 | 2.80E+06 | 7.91E+06 | 4.61E+06 | 4.12E+06 | 1.40E+06 | 1.45E+06 | 1.42E+06 |
| 7.51E+07 | 7.14E+07 | 7.11E+07 | 8.63E+07 | 7.41E+07 | 7.01E+07 | 3.08E+07 | 3.33E+07 | 3.07E+07 |
| 3.21E+07 | 3.11E+07 | 1.71E+07 | 3.84E+07 | 2.70E+07 | 2.12E+07 | 9.12E+06 | 1.06E+07 | 9.57E+06 |
| 1.57E+08 | 1.61E+08 | 9.50E+07 | 1.78E+08 | 2.13E+08 | 1.62E+08 | 7.76E+07 | 7.43E+07 | 7.22E+07 |
| 1.77E+05 | 1.95E+05 | 6.99E+04 | 2.57E+05 | 7.31E+04 | 5.76E+04 | 4.76E+04 | 3.47E+04 | 3.16E+04 |
| 2.52E+05 | 2.14E+05 | 1.80E+05 | 2.56E+05 | 1.06E+05 | 1.52E+05 | 5.52E+04 | 3.35E+04 | 5.41E+04 |
| 1.23E+06 | 1.04E+06 | 1.25E+06 | 1.24E+06 | 1.09E+06 | 1.19E+06 | 6.46E+05 | 6.18E+05 | 5.91E+05 |
| 1.90E+06 | 1.95E+06 | 1.20E+06 | 1.96E+06 | 1.10E+06 | 1.12E+06 | 4.56E+05 | 4.83E+05 | 4.98E+05 |
| 1.62E+06 | 1.48E+06 | 1.30E+06 | 2.62E+06 | 1.56E+06 | 1.17E+06 | 4.88E+05 | 3.46E+05 | 4.72E+05 |
| 6.95E+07 | 6.34E+07 | 6.41E+07 | 7.26E+07 | 6.80E+07 | 7.02E+07 | 2.84E+07 | 2.73E+07 | 2.51E+07 |
| 2.89E+06 | 2.89E+06 | 2.22E+06 | 4.05E+06 | 3.27E+06 | 2.59E+06 | 1.40E+06 | 1.02E+06 | 1.07E+06 |
| 5.81E+07 | 5.13E+07 | 4.83E+07 | 7.09E+07 | 8.32E+07 | 7.85E+07 | 2.45E+07 | 2.53E+07 | 2.40E+07 |
| 6.42E+05 | 7.12E+05 | 6.17E+05 | 9.33E+05 | 9.55E+05 | 9.86E+05 | 2.73E+05 | 2.39E+05 | 2.69E+05 |
| 2.05E+06 | 4.12E+06 | 3.48E+06 | 2.42E+06 | 2.79E+06 | 5.18E+06 | 1.78E+06 | 1.67E+06 | 6.23E+05 |
| 2.31E+06 | 1.99E+06 | 2.78E+06 | 2.88E+06 | 2.76E+06 | 1.59E+06 | 9.37E+05 | 1.00E+06 | 9.57E+05 |
| 2.98E+05 | 3.62E+05 | 2.62E+05 | 5.34E+05 | 4.96E+05 | 3.23E+05 | 1.14E+05 | 5.85E+04 | 9.07E+04 |
| 2.30E+06 | 2.21E+06 | 2.22E+06 | 3.25E+06 | 2.07E+06 | 2.40E+06 | 6.44E+05 | 5.28E+05 | 6.73E+05 |
| 1.29E+06 | 1.27E+06 | 9.18E+05 | 1.73E+06 | 1.82E+06 | 1.18E+06 | 5.24E+05 | 5.15E+05 | 5.21E+05 |
| 1.07E+07 | 1.17E+07 | 8.58E+06 | 1.69E+07 | 2.19E+07 | 1.29E+07 | 4.66E+06 | 5.11E+06 | 4.66E+06 |
| 3.44E+04 | 3.08E+04 | 2.63E+04 | 4.07E+04 | 2.59E+04 | 2.36E+04 | 1.60E+04 | 1.43E+04 | 1.44E+04 |
| 1.96E+05 | 1.28E+05 | 8.15E+04 | 2.18E+05 | 1.24E+05 | 8.03E+04 | 5.46E+04 | 4.04E+04 | 3.52E+04 |
| 1.26E+06 | 9.47E+05 | 6.26E+05 | 1.13E+06 | 5.05E+05 | 5.15E+05 | 3.82E+05 | 4.46E+05 | 4.38E+05 |
| 3.75E+07 | 3.30E+07 | 2.66E+07 | 4.12E+07 | 1.87E+07 | 2.30E+07 | 1.37E+07 | 1.51E+07 | 1.36E+07 |
| 3.31E+07 | 2.40E+07 | 1.60E+07 | 3.17E+07 | 1.43E+07 | 1.27E+07 | 8.24E+06 | 7.98E+06 | 7.41E+06 |
| 2.09E+06 | 1.75E+06 | 1.06E+06 | 2.69E+06 | 1.15E+06 | 1.06E+06 | 4.46E+05 | 5.66E+05 | 4.94E+05 |
| 1.32E+06 | 1.12E+06 | 5.97E+05 | 1.61E+06 | 1.15E+06 | 7.00E+05 | 3.00E+05 | 3.52E+05 | 3.13E+05 |
| 8.89E+06 | 7.83E+06 | 4.24E+06 | 1.03E+07 | 1.10E+07 | 7.56E+06 | 2.62E+06 | 2.62E+06 | 2.42E+06 |
| 2.55E+06 | 2.02E+06 | 1.51E+06 | 2.59E+06 | 1.97E+06 | 1.91E+06 | 6.61E+05 | 7.63E+05 | 7.03E+05 |
| 3.02E+07 | 3.08E+07 | 2.04E+07 | 3.80E+07 | 4.51E+07 | 2.82E+07 | 1.37E+07 | 1.46E+07 | 1.22E+07 |
| 6.07E+05 | 4.66E+05 | 2.93E+05 | 7.22E+05 | 3.10E+05 | 4.11E+05 | 1.58E+05 | 1.43E+05 | 1.25E+05 |
| 4.51E+05 | 4.05E+05 | 2.65E+05 | 6.81E+05 | 7.33E+05 | 4.30E+05 | 1.55E+05 | 1.36E+05 | 1.73E+05 |
| 3.63E+06 | 3.05E+06 | 2.31E+06 | 3.26E+06 | 1.28E+06 | 1.65E+06 | 1.10E+06 | 1.01E+06 | 9.26E+05 |
| 1.36E+06 | 1.15E+06 | 9.17E+05 | 1.27E+06 | 5.14E+05 | 7.44E+05 | 3.38E+05 | 4.31E+05 | 4.00E+05 |
| 4.90E+05 | 4.62E+05 | 2.45E+05 | 6.68E+05 | 3.71E+05 | 3.17E+05 | 1.16E+05 | 1.73E+05 | 1.35E+05 |
| 1.39E+06 | 1.68E+06 | 8.95E+05 | 2.14E+06 | 2.06E+06 | 1.87E+06 | 5.41E+05 | 5.65E+05 | 5.55E+05 |
| 3.25E+07 | 3.08E+07 | 2.14E+07 | 3.31E+07 | 1.79E+07 | 1.84E+07 | 8.23E+06 | 8.76E+06 | 7.50E+06 |
| 1.39E+06 | 1.24E+06 | 7.67E+05 | 1.59E+06 | 8.77E+05 | 8.49E+05 | 3.96E+05 | 3.52E+05 | 3.53E+05 |
| 3.20E+05 | 3.75E+05 | 1.34E+05 | 4.62E+05 | 2.99E+05 | 2.61E+05 | 1.00E+05 | 9.91E+04 | 8.82E+04 |
| 9.28E+07 | 8.73E+07 | 6.64E+07 | 9.81E+07 | 4.04E+07 | 5.82E+07 | 3.44E+07 | 3.25E+07 | 3.38E+07 |
| 5.09E+07 | 6.50E+07 | 4.33E+07 | 7.38E+07 | 5.09E+07 | 5.46E+07 | 2.69E+07 | 2.74E+07 | 2.54E+07 |
| 5.38E+07 | 5.24E+07 | 3.14E+07 | 5.93E+07 | 4.20E+07 | 3.68E+07 | 2.00E+07 | 1.85E+07 | 1.66E+07 |



|          |          |          |          |          |          |          |          |          |
|----------|----------|----------|----------|----------|----------|----------|----------|----------|
| 4.54E+06 | 4.23E+06 | 3.52E+06 | 4.50E+06 | 2.86E+06 | 3.20E+06 | 1.48E+06 | 1.53E+06 | 1.50E+06 |
| 3.55E+06 | 3.96E+06 | 2.62E+06 | 4.71E+06 | 4.18E+06 | 3.07E+06 | 1.73E+06 | 1.31E+06 | 1.37E+06 |
| 4.98E+05 | 5.44E+05 | 4.00E+05 | 5.21E+05 | 4.24E+05 | 4.35E+05 | 1.52E+05 | 1.61E+05 | 1.42E+05 |
| 9.19E+04 | 1.27E+05 | 1.03E+05 | 1.47E+05 | 1.18E+05 | 1.34E+05 | 5.20E+04 | 6.09E+04 | 5.19E+04 |
| 4.09E+06 | 4.54E+06 | 3.67E+06 | 4.98E+06 | 4.81E+06 | 4.69E+06 | 1.69E+06 | 1.64E+06 | 1.63E+06 |
| 7.44E+07 | 6.68E+07 | 4.50E+07 | 8.13E+07 | 5.31E+07 | 5.59E+07 | 2.73E+07 | 1.38E+07 | 2.44E+07 |
| 2.19E+06 | 2.22E+06 | 1.08E+06 | 2.23E+06 | 1.30E+06 | 1.35E+06 | 4.94E+05 | 4.83E+05 | 5.85E+05 |
| 2.41E+07 | 2.29E+07 | 1.13E+07 | 3.25E+07 | 3.53E+07 | 2.68E+07 | 7.88E+06 | 8.73E+06 | 7.93E+06 |
| 5.58E+05 | 5.69E+05 | 6.20E+05 | 9.39E+05 | 4.60E+05 | 6.55E+05 | 2.74E+05 | 2.42E+05 | 1.58E+05 |
| 6.59E+05 | 7.68E+05 | 4.18E+05 | 1.05E+06 | 1.03E+06 | 7.06E+05 | 3.41E+05 | 3.55E+05 | 2.54E+05 |
| 1.21E+05 | 1.01E+05 | 4.92E+04 | 1.53E+05 | 8.51E+04 | 9.85E+04 | 4.49E+04 | 6.32E+04 | 4.06E+04 |
| 1.54E+05 | 1.31E+05 | 9.50E+04 | 1.44E+05 | 8.65E+04 | 8.38E+04 | 3.60E+04 | 4.05E+04 | 3.27E+04 |
| 1.43E+05 | 1.39E+05 | 1.40E+05 | 1.58E+05 | 1.28E+05 | 1.31E+05 | 1.18E+05 | 1.00E+05 | 9.76E+04 |
| 6.22E+05 | 6.07E+05 | 4.28E+05 | 6.51E+05 | 4.67E+05 | 3.59E+05 | 1.65E+05 | 1.91E+05 | 1.68E+05 |
| 1.09E+07 | 9.28E+06 | 7.59E+06 | 1.06E+07 | 5.58E+06 | 5.88E+06 | 2.10E+06 | 1.81E+06 | 1.79E+06 |
| 1.29E+07 | 1.22E+07 | 9.34E+06 | 1.40E+07 | 8.41E+06 | 1.08E+07 | 3.45E+06 | 2.93E+06 | 3.69E+06 |
| 2.03E+05 | 1.66E+05 | 1.32E+05 | 2.19E+05 | 1.01E+05 | 1.36E+05 | 4.26E+04 | 2.98E+04 | 3.89E+04 |
| 1.15E+05 | 8.75E+04 | 9.32E+04 | 8.92E+04 | 4.77E+04 | 9.00E+00 | 3.46E+04 | 3.56E+04 | 2.26E+04 |
| 9.37E+05 | 8.06E+05 | 8.16E+05 | 1.03E+06 | 4.82E+05 | 8.35E+05 | 3.16E+05 | 2.97E+05 | 2.93E+05 |
| 2.24E+06 | 2.29E+06 | 1.67E+06 | 2.71E+06 | 2.92E+06 | 2.61E+06 | 9.61E+05 | 1.03E+06 | 8.32E+05 |
| 1.02E+06 | 1.13E+06 | 7.02E+05 | 1.20E+06 | 6.57E+05 | 9.22E+05 | 3.90E+05 | 3.09E+05 | 4.00E+05 |
| 3.29E+06 | 3.68E+06 | 2.39E+06 | 3.78E+06 | 4.64E+06 | 4.41E+06 | 1.29E+06 | 1.41E+06 | 1.29E+06 |
| 4.54E+05 | 4.02E+05 | 2.04E+05 | 5.17E+05 | 2.80E+05 | 2.84E+05 | 1.19E+05 | 1.20E+05 | 1.15E+05 |
| 6.36E+05 | 4.68E+05 | 4.84E+05 | 7.29E+05 | 3.65E+05 | 5.29E+05 | 1.20E+05 | 9.79E+04 | 1.40E+05 |
| 1.86E+06 | 1.55E+06 | 1.49E+06 | 2.37E+06 | 2.47E+06 | 1.72E+06 | 8.93E+05 | 9.16E+05 | 7.71E+05 |
| 2.66E+07 | 2.45E+07 | 1.95E+07 | 2.45E+07 | 1.46E+07 | 1.77E+07 | 6.51E+06 | 6.58E+06 | 6.53E+06 |
| 8.89E+06 | 8.35E+06 | 7.07E+06 | 8.53E+06 | 5.37E+06 | 7.56E+06 | 2.79E+06 | 2.81E+06 | 2.72E+06 |
| 8.27E+04 | 3.84E+05 | 2.99E+05 | 4.31E+05 | 2.29E+05 | 2.77E+05 | 6.31E+04 | 7.15E+04 | 6.54E+04 |
| 4.16E+06 | 3.79E+06 | 4.20E+06 | 4.72E+06 | 2.88E+06 | 3.99E+06 | 1.09E+06 | 1.20E+06 | 1.09E+06 |
| 1.58E+06 | 1.48E+06 | 1.03E+06 | 1.62E+06 | 9.50E+05 | 9.81E+05 | 4.87E+05 | 4.76E+05 | 4.79E+05 |
| 3.89E+06 | 4.03E+06 | 2.74E+06 | 4.52E+06 | 2.75E+06 | 3.19E+06 | 1.54E+06 | 1.50E+06 | 1.14E+06 |
| 5.94E+05 | 6.08E+05 | 4.12E+05 | 7.66E+05 | 5.21E+05 | 5.24E+05 | 2.30E+05 | 1.86E+05 | 1.89E+05 |
| 1.32E+06 | 1.28E+06 | 7.20E+05 | 1.52E+06 | 1.73E+06 | 1.55E+06 | 4.14E+05 | 3.97E+05 | 3.81E+05 |
| 2.79E+05 | 2.71E+05 | 3.48E+05 | 3.65E+05 | 1.79E+05 | 3.47E+05 | 1.23E+05 | 1.16E+05 | 9.53E+04 |
| 6.17E+04 | 6.87E+04 | 3.50E+04 | 6.94E+04 | 1.08E+05 | 1.24E+05 | 4.15E+04 | 2.77E+04 | 4.30E+04 |
| 7.20E+07 | 6.40E+07 | 4.27E+07 | 7.09E+07 | 5.63E+07 | 5.21E+07 | 2.06E+07 | 2.11E+07 | 1.90E+07 |
| 2.12E+06 | 2.26E+06 | 1.92E+06 | 2.64E+06 | 3.48E+06 | 2.25E+06 | 8.63E+05 | 8.17E+05 | 8.11E+05 |
| 9.95E+06 | 1.07E+07 | 8.66E+06 | 1.64E+07 | 8.79E+06 | 9.75E+06 | 4.74E+06 | 4.47E+06 | 4.06E+06 |
| 2.84E+07 | 2.35E+07 | 1.53E+07 | 2.36E+07 | 1.09E+07 | 1.26E+07 | 4.41E+06 | 4.20E+06 | 4.15E+06 |
| 6.06E+05 | 7.33E+05 | 7.04E+05 | 7.05E+05 | 6.58E+05 | 7.64E+05 | 6.30E+05 | 6.31E+05 | 6.13E+05 |
| 8.20E+06 | 6.85E+06 | 7.64E+06 | 8.41E+06 | 7.57E+06 | 4.88E+06 | 2.72E+06 | 2.75E+06 | 2.72E+06 |
| 1.55E+06 | 1.15E+06 | 1.29E+06 | 1.79E+06 | 2.13E+06 | 1.68E+06 | 4.40E+05 | 4.24E+05 | 4.07E+05 |
| 5.01E+07 | 4.64E+07 | 4.74E+07 | 5.34E+07 | 4.21E+07 | 3.84E+07 | 1.52E+07 | 1.57E+07 | 1.39E+07 |
| 6.75E+07 | 5.85E+07 | 6.59E+07 | 7.32E+07 | 6.49E+07 | 6.28E+07 | 2.61E+07 | 2.45E+07 | 2.69E+07 |
| 3.00E+05 | 2.51E+05 | 2.68E+05 | 4.05E+05 | 1.76E+05 | 2.45E+05 | 7.63E+04 | 7.41E+04 | 7.68E+04 |
| 5.41E+04 | 5.29E+04 | 5.31E+04 | 6.87E+04 | 5.69E+04 | 5.40E+04 | 2.94E+04 | 2.28E+04 | 2.29E+04 |
| 1.60E+06 | 1.08E+06 | 1.37E+06 | 1.82E+06 | 1.31E+06 | 1.08E+06 | 3.71E+05 | 3.75E+05 | 3.94E+05 |
| 4.25E+06 | 4.15E+06 | 4.38E+06 | 5.09E+06 | 3.91E+06 | 3.75E+06 | 9.39E+05 | 8.84E+05 | 9.75E+05 |
| 1.63E+07 | 1.57E+07 | 1.30E+07 | 1.86E+07 | 1.63E+07 | 1.78E+07 | 6.71E+06 | 6.17E+06 | 5.56E+06 |
| 6.09E+05 | 6.21E+05 | 5.06E+05 | 8.40E+05 | 6.39E+05 | 6.14E+05 | 1.36E+05 | 1.26E+05 | 1.20E+05 |
| 1.43E+06 | 1.35E+06 | 1.28E+06 | 1.80E+06 | 2.10E+06 | 1.55E+06 | 4.53E+05 | 4.93E+05 | 4.09E+05 |
| 1.39E+07 | 1.16E+07 | 1.07E+07 | 1.49E+07 | 1.87E+07 | 1.46E+07 | 4.47E+06 | 4.85E+06 | 4.24E+06 |
| 9.76E+05 | 8.09E+05 | 8.19E+05 | 1.43E+06 | 8.09E+05 | 8.92E+05 | 2.28E+05 | 2.50E+05 | 2.26E+05 |
| 6.03E+06 | 6.23E+06 | 6.52E+06 | 7.87E+06 | 5.11E+06 | 6.33E+06 | 2.66E+06 | 2.45E+06 | 2.68E+06 |

|          |          |          |          |          |          |          |          |          |
|----------|----------|----------|----------|----------|----------|----------|----------|----------|
| 3.03E+07 | 3.20E+07 | 3.10E+07 | 3.97E+07 | 3.18E+07 | 3.12E+07 | 1.52E+07 | 1.47E+07 | 1.28E+07 |
| 1.15E+05 | 9.74E+04 | 1.04E+05 | 1.68E+05 | 1.41E+05 | 6.98E+04 | 3.32E+04 | 2.63E+04 | 3.68E+04 |
| 5.33E+07 | 5.22E+07 | 4.66E+07 | 6.32E+07 | 8.48E+07 | 6.87E+07 | 2.47E+07 | 2.60E+07 | 2.47E+07 |
| 5.53E+06 | 5.64E+06 | 6.94E+06 | 8.15E+06 | 4.65E+06 | 7.88E+06 | 3.09E+06 | 2.65E+06 | 2.60E+06 |
| 1.65E+03 | 1.59E+03 | 1.69E+03 | 9.00E+00 | 1.84E+03 | 1.45E+03 | 8.89E+02 | 1.30E+03 | 7.75E+02 |
| 5.42E+03 | 6.40E+03 | 6.27E+03 | 7.96E+03 | 8.50E+03 | 4.73E+03 | 3.77E+03 | 3.05E+03 | 3.42E+03 |
| 4.83E+06 | 4.59E+06 | 3.59E+06 | 4.81E+06 | 5.33E+06 | 4.29E+06 | 1.80E+06 | 1.63E+06 | 1.44E+06 |
| 1.28E+05 | 2.80E+05 | 9.35E+04 | 3.96E+05 | 2.11E+05 | 1.49E+05 | 3.90E+04 | 4.13E+04 | 3.87E+04 |
| 2.71E+05 | 2.40E+05 | 2.05E+05 | 3.41E+05 | 4.26E+05 | 2.82E+05 | 1.05E+05 | 7.09E+04 | 9.82E+04 |
| 2.28E+06 | 2.84E+06 | 2.69E+06 | 3.57E+06 | 4.90E+06 | 4.63E+06 | 1.18E+06 | 8.41E+05 | 1.04E+06 |
| 3.24E+04 | 3.55E+04 | 3.70E+04 | 4.91E+04 | 3.27E+04 | 3.90E+04 | 1.81E+04 | 1.30E+04 | 1.34E+04 |
| 4.17E+06 | 3.61E+06 | 2.16E+06 | 5.38E+06 | 4.07E+06 | 2.87E+06 | 1.04E+06 | 1.21E+06 | 1.13E+06 |
| 1.07E+06 | 9.98E+05 | 7.08E+05 | 1.27E+06 | 6.02E+05 | 7.38E+05 | 3.26E+05 | 3.01E+05 | 2.91E+05 |
| 2.81E+07 | 2.06E+07 | 1.65E+07 | 3.45E+07 | 1.59E+07 | 1.59E+07 | 6.79E+06 | 9.07E+06 | 1.36E+07 |
| 7.67E+07 | 6.52E+07 | 6.81E+07 | 7.38E+07 | 5.18E+07 | 6.09E+07 | 2.71E+07 | 2.45E+07 | 2.39E+07 |
| 5.34E+07 | 5.48E+07 | 4.77E+07 | 6.72E+07 | 4.12E+07 | 5.23E+07 | 2.32E+07 | 2.27E+07 | 1.99E+07 |
| 6.83E+06 | 5.15E+06 | 5.27E+06 | 7.57E+06 | 3.06E+06 | 5.30E+06 | 1.22E+06 | 1.30E+06 | 1.34E+06 |
| 1.33E+07 | 1.12E+07 | 1.31E+07 | 1.62E+07 | 8.58E+06 | 1.20E+07 | 3.59E+06 | 3.21E+06 | 3.59E+06 |
| 2.89E+04 | 2.85E+04 | 2.34E+04 | 3.70E+04 | 5.76E+04 | 3.59E+04 | 2.47E+04 | 1.46E+04 | 1.27E+04 |
| 8.73E+05 | 8.05E+05 | 8.36E+05 | 1.23E+06 | 7.22E+05 | 1.10E+06 | 3.19E+05 | 3.16E+05 | 2.91E+05 |
| 3.34E+06 | 3.21E+06 | 3.26E+06 | 3.98E+06 | 3.16E+06 | 3.63E+06 | 9.44E+05 | 8.45E+05 | 7.88E+05 |
| 1.11E+07 | 1.17E+07 | 1.08E+07 | 1.38E+07 | 1.72E+07 | 1.61E+07 | 5.55E+06 | 6.12E+06 | 5.97E+06 |
| 1.39E+05 | 1.89E+05 | 2.16E+05 | 2.39E+05 | 1.46E+05 | 2.05E+05 | 5.27E+04 | 5.13E+04 | 4.53E+04 |
| 1.94E+07 | 1.87E+07 | 2.10E+07 | 2.74E+07 | 1.96E+07 | 2.34E+07 | 9.87E+06 | 9.56E+06 | 9.25E+06 |
| 2.54E+07 | 2.21E+07 | 1.92E+07 | 2.89E+07 | 1.79E+07 | 1.94E+07 | 9.32E+06 | 9.84E+06 | 8.76E+06 |
| 3.07E+06 | 3.61E+06 | 1.76E+06 | 4.43E+06 | 2.62E+06 | 2.56E+06 | 9.40E+05 | 8.87E+05 | 1.06E+06 |
| 3.54E+05 | 4.04E+05 | 3.20E+05 | 4.53E+05 | 2.81E+05 | 4.78E+05 | 1.64E+05 | 1.21E+05 | 1.60E+05 |
| 2.68E+06 | 2.43E+06 | 2.58E+06 | 3.52E+06 | 2.50E+06 | 2.56E+06 | 7.31E+05 | 8.37E+05 | 8.19E+05 |
| 8.91E+06 | 8.66E+06 | 9.03E+06 | 1.18E+07 | 7.83E+06 | 1.15E+07 | 4.04E+06 | 3.87E+06 | 3.90E+06 |
| 9.47E+06 | 9.66E+06 | 1.11E+07 | 1.34E+07 | 9.18E+06 | 1.22E+07 | 4.17E+06 | 4.49E+06 | 4.12E+06 |
| 3.02E+07 | 2.84E+07 | 2.97E+07 | 3.69E+07 | 3.04E+07 | 3.75E+07 | 1.15E+07 | 1.40E+07 | 1.26E+07 |
| 1.88E+05 | 2.60E+05 | 1.89E+05 | 3.02E+05 | 7.34E+04 | 2.49E+05 | 9.84E+04 | 9.65E+04 | 8.98E+04 |
| 9.75E+04 | 1.18E+05 | 1.42E+05 | 2.17E+05 | 1.16E+05 | 1.33E+05 | 5.56E+04 | 6.18E+04 | 3.63E+04 |
| 4.59E+06 | 4.59E+06 | 4.36E+06 | 6.30E+06 | 4.80E+06 | 5.36E+06 | 1.33E+06 | 1.11E+06 | 1.11E+06 |
| 2.09E+06 | 2.37E+06 | 2.88E+06 | 3.19E+06 | 2.70E+06 | 3.38E+06 | 1.10E+06 | 9.35E+05 | 9.09E+05 |
| 6.16E+06 | 6.41E+06 | 7.14E+06 | 7.22E+06 | 7.93E+06 | 7.81E+06 | 2.92E+06 | 3.62E+06 | 2.00E+06 |
| 5.36E+07 | 5.34E+07 | 4.48E+07 | 7.14E+07 | 8.55E+07 | 8.52E+07 | 2.83E+07 | 2.96E+07 | 2.65E+07 |
| 5.64E+04 | 7.02E+04 | 7.14E+04 | 8.59E+04 | 1.03E+05 | 7.11E+04 | 2.55E+04 | 2.99E+04 | 1.68E+04 |
| 4.56E+06 | 4.14E+06 | 2.13E+06 | 5.93E+06 | 5.54E+06 | 4.24E+06 | 1.67E+06 | 1.39E+06 | 1.76E+06 |
| 2.11E+05 | 1.74E+05 | 1.77E+05 | 2.42E+05 | 2.15E+05 | 2.31E+05 | 8.53E+04 | 5.68E+04 | 6.09E+04 |
| 2.43E+05 | 2.14E+05 | 1.98E+05 | 3.72E+05 | 1.79E+05 | 2.99E+05 | 1.05E+05 | 1.01E+05 | 8.36E+04 |
| 3.89E+05 | 4.14E+05 | 3.80E+05 | 5.68E+05 | 6.20E+05 | 8.90E+05 | 2.07E+05 | 2.12E+05 | 2.40E+05 |
| 2.37E+05 | 2.06E+05 | 2.47E+05 | 3.44E+05 | 1.55E+05 | 2.78E+05 | 5.67E+04 | 4.24E+04 | 6.01E+04 |
| 2.99E+05 | 2.94E+05 | 2.93E+05 | 3.97E+05 | 2.16E+05 | 3.07E+05 | 8.27E+04 | 7.65E+04 | 7.62E+04 |
| 1.01E+05 | 9.47E+04 | 1.25E+05 | 1.27E+05 | 9.71E+04 | 1.10E+05 | 3.74E+04 | 3.85E+04 | 3.85E+04 |
| 1.48E+06 | 1.46E+06 | 1.44E+06 | 1.76E+06 | 2.55E+06 | 3.01E+06 | 6.66E+05 | 6.69E+05 | 6.60E+05 |
| 2.49E+07 | 2.50E+07 | 1.97E+07 | 2.83E+07 | 2.00E+07 | 2.15E+07 | 8.48E+06 | 9.22E+06 | 8.47E+06 |
| 1.12E+06 | 9.55E+05 | 1.19E+06 | 1.70E+06 | 1.08E+06 | 1.23E+06 | 2.85E+05 | 2.54E+05 | 2.37E+05 |
| 1.20E+06 | 1.16E+06 | 1.41E+06 | 1.75E+06 | 1.57E+06 | 1.50E+06 | 5.36E+05 | 5.93E+05 | 5.27E+05 |
| 4.73E+05 | 4.97E+05 | 5.50E+05 | 7.31E+05 | 8.25E+05 | 7.47E+05 | 1.68E+05 | 1.72E+05 | 1.13E+05 |
| 1.66E+05 | 1.98E+05 | 1.77E+05 | 2.93E+05 | 2.67E+05 | 1.90E+05 | 8.23E+04 | 3.57E+04 | 7.10E+04 |
| 2.49E+06 | 2.29E+06 | 2.75E+06 | 3.29E+06 | 3.29E+06 | 2.74E+06 | 1.24E+06 | 1.18E+06 | 9.14E+05 |
| 5.38E+05 | 5.20E+05 | 5.42E+05 | 6.53E+05 | 7.83E+05 | 6.72E+05 | 3.10E+05 | 2.19E+05 | 1.76E+05 |
| 3.19E+05 | 3.11E+05 | 3.26E+05 | 4.30E+05 | 3.35E+05 | 4.32E+05 | 1.16E+05 | 1.12E+05 | 1.34E+05 |

|          |          |          |          |          |          |          |          |          |
|----------|----------|----------|----------|----------|----------|----------|----------|----------|
| 8.53E+04 | 8.04E+04 | 1.01E+05 | 1.61E+05 | 1.80E+05 | 2.51E+05 | 8.46E+04 | 8.11E+04 | 6.44E+04 |
| 1.25E+05 | 1.31E+05 | 1.44E+05 | 1.61E+05 | 1.28E+05 | 1.40E+05 | 4.52E+04 | 4.06E+04 | 4.03E+04 |
| 1.38E+07 | 1.10E+07 | 6.39E+06 | 1.58E+07 | 9.70E+06 | 1.22E+07 | 4.96E+06 | 4.26E+06 | 3.99E+06 |
| 2.64E+06 | 2.74E+06 | 3.22E+06 | 4.35E+06 | 2.70E+06 | 3.80E+06 | 1.57E+06 | 1.26E+06 | 1.44E+06 |
| 7.60E+06 | 1.44E+07 | 1.31E+07 | 1.01E+07 | 9.46E+06 | 1.22E+07 | 6.30E+06 | 3.73E+06 | 6.07E+06 |
| 3.63E+05 | 3.78E+05 | 4.38E+05 | 4.74E+05 | 3.00E+05 | 4.79E+05 | 1.68E+05 | 1.30E+05 | 1.95E+05 |
| 7.14E+05 | 8.93E+05 | 6.70E+05 | 1.17E+06 | 1.15E+06 | 1.25E+06 | 2.91E+05 | 2.71E+05 | 3.28E+05 |
| 1.85E+07 | 2.07E+07 | 1.26E+07 | 2.96E+07 | 4.05E+07 | 3.47E+07 | 8.04E+06 | 9.65E+06 | 9.11E+06 |
| 1.63E+05 | 1.55E+05 | 1.85E+05 | 3.01E+05 | 2.49E+05 | 2.99E+05 | 7.57E+04 | 6.22E+04 | 8.24E+04 |
| 2.47E+06 | 2.30E+06 | 1.10E+06 | 3.13E+06 | 2.81E+06 | 9.00E+05 | 7.53E+05 | 8.50E+05 | 6.63E+05 |
| 1.30E+05 | 1.70E+05 | 5.32E+04 | 2.85E+05 | 1.94E+05 | 8.28E+04 | 2.45E+04 | 3.61E+04 | 6.20E+04 |
| 1.75E+06 | 1.63E+06 | 2.82E+06 | 2.92E+06 | 2.54E+06 | 2.75E+06 | 1.17E+06 | 7.40E+05 | 1.14E+06 |
| 3.78E+05 | 3.68E+05 | 2.21E+05 | 6.53E+05 | 6.01E+05 | 3.48E+05 | 1.35E+05 | 1.68E+05 | 1.28E+05 |
| 3.26E+06 | 3.83E+06 | 3.15E+06 | 6.87E+06 | 8.32E+06 | 5.24E+06 | 1.74E+06 | 1.62E+06 | 1.64E+06 |
| 4.36E+05 | 4.48E+05 | 4.81E+05 | 7.22E+05 | 7.52E+05 | 8.88E+05 | 2.62E+05 | 2.51E+05 | 2.47E+05 |
| 5.34E+06 | 4.96E+06 | 4.34E+06 | 5.70E+06 | 4.79E+06 | 5.00E+06 | 2.65E+06 | 2.45E+06 | 2.10E+06 |
| 1.99E+05 | 1.85E+05 | 2.18E+05 | 1.51E+06 | 2.40E+05 | 2.02E+05 | 6.41E+04 | 8.04E+04 | 7.62E+04 |
| 4.66E+06 | 5.56E+06 | 3.48E+06 | 8.24E+06 | 1.22E+07 | 9.53E+06 | 2.18E+06 | 2.66E+06 | 2.37E+06 |
| 1.84E+06 | 1.47E+06 | 1.13E+06 | 2.08E+06 | 2.23E+06 | 9.13E+05 | 5.59E+05 | 4.70E+05 | 5.14E+05 |
| 4.94E+05 | 4.37E+05 | 2.56E+05 | 7.04E+05 | 5.32E+05 | 2.27E+05 | 1.94E+05 | 1.47E+05 | 1.75E+05 |
| 1.73E+06 | 1.76E+06 | 1.02E+06 | 2.34E+06 | 3.83E+06 | 2.41E+06 | 8.40E+05 | 7.59E+05 | 7.48E+05 |
| 4.46E+06 | 5.23E+06 | 3.57E+06 | 6.48E+06 | 1.02E+07 | 7.61E+06 | 2.29E+06 | 2.02E+06 | 2.07E+06 |
| 6.97E+05 | 7.58E+05 | 4.43E+05 | 1.06E+06 | 1.78E+06 | 1.23E+06 | 3.18E+05 | 3.81E+05 | 3.40E+05 |
| 2.05E+05 | 1.62E+05 | 1.48E+05 | 2.14E+05 | 3.01E+05 | 2.57E+05 | 7.76E+04 | 6.38E+04 | 7.97E+04 |
| 3.00E+06 | 3.05E+06 | 2.95E+06 | 4.07E+06 | 1.96E+06 | 3.43E+06 | 9.73E+05 | 9.73E+05 | 9.52E+05 |
| 1.60E+06 | 1.70E+06 | 1.76E+06 | 2.23E+06 | 1.26E+06 | 2.13E+06 | 5.95E+05 | 7.37E+05 | 6.70E+05 |
| 3.29E+05 | 3.78E+05 | 3.14E+05 | 4.96E+05 | 4.95E+05 | 4.18E+05 | 9.85E+04 | 7.68E+04 | 8.27E+04 |
| 8.04E+06 | 8.86E+06 | 8.33E+06 | 1.04E+07 | 7.60E+06 | 9.57E+06 | 3.75E+06 | 3.47E+06 | 4.02E+06 |
| 1.37E+06 | 1.24E+06 | 1.47E+06 | 2.15E+06 | 1.38E+06 | 1.80E+06 | 6.63E+05 | 7.35E+05 | 6.70E+05 |
| 6.48E+04 | 2.29E+05 | 2.33E+05 | 3.78E+05 | 1.28E+05 | 3.00E+05 | 6.51E+04 | 5.93E+04 | 4.67E+04 |
| 3.26E+06 | 3.08E+06 | 3.25E+06 | 3.61E+06 | 2.96E+06 | 3.16E+06 | 1.08E+06 | 9.63E+05 | 1.02E+06 |
| 5.33E+05 | 5.83E+05 | 5.62E+05 | 8.07E+05 | 5.62E+05 | 5.67E+05 | 2.38E+05 | 2.35E+05 | 2.16E+05 |
| 2.43E+06 | 3.05E+06 | 3.06E+06 | 3.84E+06 | 4.51E+06 | 4.43E+06 | 1.49E+06 | 1.41E+06 | 1.38E+06 |
| 1.53E+06 | 1.68E+06 | 1.38E+06 | 2.25E+06 | 1.48E+06 | 1.86E+06 | 5.50E+05 | 5.13E+05 | 5.64E+05 |
| 3.64E+04 | 3.39E+04 | 4.10E+04 | 4.06E+04 | 2.88E+04 | 3.17E+04 | 1.57E+04 | 1.54E+04 | 8.92E+03 |
| 6.88E+04 | 8.19E+04 | 8.74E+04 | 9.92E+04 | 1.34E+05 | 7.71E+04 | 2.62E+04 | 3.48E+04 | 2.20E+04 |
| 3.03E+04 | 2.41E+04 | 2.44E+04 | 3.42E+04 | 2.29E+04 | 3.10E+04 | 1.07E+04 | 8.91E+03 | 1.14E+04 |
| 5.07E+04 | 6.40E+04 | 6.66E+04 | 8.70E+04 | 6.60E+04 | 8.75E+04 | 2.67E+04 | 2.06E+04 | 2.32E+04 |
| 7.05E+04 | 8.76E+04 | 6.19E+04 | 9.84E+04 | 9.72E+04 | 8.54E+04 | 7.79E+04 | 1.11E+05 | 1.11E+05 |
| 2.30E+04 | 3.28E+04 | 3.51E+04 | 3.49E+04 | 2.49E+04 | 2.18E+04 | 2.61E+04 | 2.45E+04 | 3.39E+04 |
| 7.67E+04 | 6.73E+04 | 5.17E+04 | 1.04E+05 | 4.78E+04 | 3.75E+04 | 6.14E+04 | 5.97E+04 | 7.47E+04 |
| 7.67E+04 | 1.12E+05 | 1.14E+05 | 1.10E+05 | 1.28E+05 | 1.18E+05 | 4.46E+04 | 5.92E+04 | 5.32E+04 |
| 1.72E+05 | 1.59E+05 | 1.29E+05 | 2.17E+05 | 1.50E+05 | 1.24E+05 | 1.55E+05 | 1.91E+05 | 1.55E+05 |
| 2.34E+05 | 2.51E+05 | 1.95E+05 | 2.87E+05 | 1.64E+05 | 1.76E+05 | 3.25E+05 | 3.22E+05 | 3.19E+05 |
| 5.32E+05 | 4.59E+05 | 3.33E+05 | 5.09E+05 | 4.32E+05 | 2.90E+05 | 1.96E+05 | 2.24E+05 | 2.33E+05 |
| 4.42E+05 | 4.36E+05 | 3.62E+05 | 5.61E+05 | 6.40E+05 | 3.23E+05 | 2.26E+05 | 2.42E+05 | 1.97E+05 |
| 1.34E+05 | 1.15E+05 | 7.00E+04 | 1.03E+05 | 8.82E+04 | 1.13E+05 | 1.08E+05 | 1.00E+05 | 1.10E+05 |
| 1.89E+05 | 1.72E+05 | 8.28E+04 | 2.31E+05 | 1.82E+05 | 2.24E+05 | 5.70E+04 | 1.20E+05 | 1.09E+05 |
| 3.83E+05 | 4.61E+05 | 3.65E+05 | 4.81E+05 | 5.72E+05 | 3.71E+05 | 2.07E+05 | 2.15E+05 | 1.82E+05 |
| 8.85E+04 | 5.86E+04 | 4.41E+04 | 1.08E+05 | 1.15E+05 | 1.05E+05 | 6.32E+04 | 6.48E+04 | 3.97E+04 |
| 3.96E+04 | 4.36E+04 | 4.03E+04 | 5.66E+04 | 2.31E+04 | 3.79E+04 | 1.13E+04 | 1.14E+04 | 1.42E+04 |
| 4.23E+03 | 5.56E+03 | 6.49E+03 | 6.05E+03 | 4.18E+03 | 3.36E+03 | 1.66E+04 | 1.71E+04 | 1.77E+04 |
| 2.79E+06 | 2.44E+06 | 3.13E+06 | 2.64E+06 | 2.65E+06 | 4.59E+06 | 1.58E+06 | 2.18E+06 | 1.97E+06 |
| 2.03E+06 | 1.30E+06 | 2.28E+06 | 2.63E+06 | 8.20E+05 | 3.22E+06 | 9.23E+05 | 1.10E+06 | 1.02E+06 |

|          |          |          |          |          |          |          |          |          |
|----------|----------|----------|----------|----------|----------|----------|----------|----------|
| 6.44E+03 | 2.43E+04 | 6.22E+03 | 4.02E+04 | 8.26E+03 | 6.63E+03 | 1.05E+04 | 1.17E+04 | 1.35E+04 |
| 2.29E+06 | 1.69E+06 | 2.54E+06 | 2.32E+06 | 1.83E+06 | 4.03E+06 | 1.64E+06 | 1.57E+06 | 1.61E+06 |
| 7.05E+04 | 5.80E+04 | 7.82E+04 | 7.68E+04 | 5.72E+04 | 9.27E+04 | 4.52E+04 | 4.65E+04 | 5.16E+04 |
| 4.96E+04 | 4.38E+04 | 5.24E+04 | 4.59E+04 | 4.46E+04 | 4.72E+04 | 4.85E+04 | 4.81E+04 | 4.58E+04 |

supplemental Table 2

| Compounds                  | FC         | VIP     | P value  |
|----------------------------|------------|---------|----------|
| 6,7-diketolithocholic acid | 6.05634604 | 1.54629 | 0.00054  |
| PI(20:4_20:1)              | 0.72878948 | 1.23755 | 0.038369 |
| Cer(d20:1/24:1(2OH))       | 53.3761161 | 1.469   | 0.000181 |
| PS(17:2_18:2)              | 0.63741725 | 1.14164 | 0.025817 |
| Carnitine C20:2            | 0.22243728 | 1.12593 | 0.004698 |
| CE(22:6)                   | 0.34007215 | 1.31803 | 0.000306 |
| SPH(d18:1)                 | 0.71058051 | 1.07497 | 0.001808 |
| DG(18:0_20:3)              | 0.55729101 | 1.36414 | 0.006388 |
| DG(18:0_20:4)              | 2.35480897 | 1.66101 | 0.024148 |
| DG(16:0_20:4)              | 0.70679399 | 1.48779 | 0.000898 |
| DG(18:2_22:6)              | 0.6322581  | 1.4289  | 0.002283 |
| PE(22:1_18:0)              | 0.39332501 | 1.66995 | 0.000011 |
| PE(17:1_18:1)              | 0.28409435 | 1.71774 | 0.000001 |
| DG(18:0_22:4)              | 1.68954205 | 1.2884  | 0.014646 |
| HexCer(d16:1/24:1)         | 0.68867899 | 1.34997 | 0.005306 |
| HexCer(d18:1/18:0)         | 332        | 1.43975 | 0.003411 |
| LPC(0:0/20:0)              | 0.71874051 | 1.49762 | 0.000729 |
| HexCer(d18:2/24:1)         | 0.75780409 | 1.23037 | 0.019889 |
| LPC(20:0/0:0)              | 0.64404997 | 1.34918 | 0.007178 |
| PA(16:0_18:1)              | 0.35758314 | 1.54883 | 0.000321 |
| LPC(22:1/0:0)              | 0.6432184  | 1.34001 | 0.008582 |
| LPE(0:0/18:1)              | 0.30950139 | 1.45692 | 0.001805 |
| LPE(22:2/0:0)              | 2.52528991 | 1.50019 | 0.026352 |
| LPE(0:0/20:3)              | 0.40584588 | 1.48456 | 0.001083 |
| LPC(20:1/0:0)              | 0.73720783 | 1.56352 | 0.000348 |
| LPC(24:0/0:0)              | 0.75349179 | 1.27822 | 0.010721 |
| PA(16:0_18:0)              | 0.4855163  | 1.6098  | 0.000002 |
| PA(18:1_18:1)              | 0.39247675 | 1.51111 | 0.000703 |
| LPC(20:3/0:0)              | 0.55951532 | 1.27239 | 0.017392 |
| LPE(20:2/0:0)              | 0.60832388 | 1.49136 | 0.000863 |
| LPE(0:0/20:1)              | 0.45137852 | 1.03137 | 0.005166 |
| PE(P-18:2_18:2)            | 0.759016   | 1.21408 | 0.020794 |
| PE(P-18:1_20:3)            | 0.79067411 | 1.18985 | 0.019586 |
| PE(P-18:2_20:2)            | 1.82972973 | 1.40393 | 0.010961 |
| PE(P-24:2_18:2)            | 3.01633665 | 1.44725 | 0.018158 |
| PE(P-18:1_22:4)            | 0.58485612 | 1.30648 | 0.011222 |
| PE(P-20:0_22:5)            | 0.62635439 | 1.2674  | 0.010784 |
| PE(P-22:1_20:4)            | 0.67771582 | 1.0204  | 0.013723 |
| PE(P-18:1_24:5)            | 0.68426517 | 1.56089 | 0.000287 |
| PE(P-20:1_22:6)            | 0.60325607 | 1.41657 | 0.00232  |
| PE(P-22:1_22:6)            | 0.68243627 | 1.36998 | 0.004127 |
| PI(18:1_18:1)              | 0.45837877 | 1.52255 | 0.000506 |
| PE(P-18:2_20:4)            | 0.18346667 | 1.03038 | 0.000014 |
| Cer(d18:1/21:0)            | 0.52847217 | 1.41939 | 0.003079 |
| Cer(d18:1/23:0)            | 0.77551864 | 1.15991 | 0.030741 |
| Cer(d18:1/20:1)            | 0.49224218 | 1.45068 | 0.001589 |
| DG(21:0_16:0)              | 0.63556461 | 1.27637 | 0.010811 |
| DG(16:0_16:1)              | 6.4782587  | 1.36897 | 0.005943 |
| CE(18:2)                   | 1.52486848 | 1.0982  | 0.014013 |
| Cer(d18:2/23:0)            | 0.63640923 | 1.3232  | 0.007959 |
| LPE(22:6/0:0)              | 0.68705365 | 1.26596 | 0.011932 |
| PC(O-18:1_22:0)            | 0.63605341 | 1.3399  | 0.005807 |

|                 |            |         |          |
|-----------------|------------|---------|----------|
| PE(P-18:1_20:1) | 0.71389169 | 1.31882 | 0.007235 |
| LPE(P-18:1)     | 0.70675857 | 1.58658 | 0.03707  |
| PC(16:0_24:0)   | 0.74497588 | 1.11218 | 0.049729 |
| LPE(P-18:0)     | 0.57675853 | 1.43243 | 0.002548 |
| PC(O-20:0_22:4) | 0.5537856  | 1.41308 | 0.003042 |
| PE(P-16:0_18:3) | 0.60776413 | 1.39247 | 0.004256 |
| PA(16:0_20:4)   | 0.34210487 | 1.55685 | 0.000262 |
| PC(19:0_18:1)   | 0.63662381 | 1.44301 | 0.001977 |
| PC(14:0_18:2)   | 0.51521739 | 1.40161 | 0.003903 |
| PA(18:1_22:6)   | 0.4877087  | 1.53383 | 0.000453 |
| PC(O-20:1_20:4) | 0.52354921 | 1.50896 | 0.00071  |
| PC(18:1_24:1)   | 0.47185655 | 1.46559 | 0.001575 |
| PC(16:0_20:5)   | 0.5820097  | 1.39561 | 0.003131 |
| PE(P-18:0_18:0) | 0.42586057 | 1.47989 | 0.001196 |
| PC(24:1_20:4)   | 0.35781088 | 1.45237 | 0.001829 |
| PE(P-17:0_20:3) | 0.57830429 | 1.42837 | 0.002638 |
| PE(P-18:0_20:0) | 0.47057329 | 1.41258 | 0.003344 |
| PE(P-18:1_20:4) | 0.54174715 | 1.46392 | 0.001531 |
| PE(O-16:0_16:0) | 0.37526345 | 1.52211 | 0.000573 |
| LPG(22:4)       | 0.39570342 | 1.57821 | 0.000171 |
| PC(14:0_14:0)   | 0.70932975 | 1.3658  | 0.002367 |
| PC(O-22:1_20:4) | 0.5641776  | 1.53675 | 0.000382 |
| PE(P-16:0_17:1) | 0.56419438 | 1.42788 | 0.002634 |
| PE(P-16:0_18:1) | 0.44971941 | 1.46589 | 0.001513 |
| PE(P-18:0_22:3) | 0.27054873 | 1.30851 | 0.000003 |
| PE(P-18:0_18:1) | 0.48231661 | 1.49045 | 0.001006 |
| PE(O-20:0_16:0) | 0.31658779 | 1.51874 | 0.000605 |
| PE(P-16:0_16:1) | 0.38520307 | 1.48696 | 0.001051 |
| PE(O-16:0_20:0) | 0.19248669 | 1.59226 | 0.000117 |
| PC(18:0_24:3)   | 0.62143952 | 1.38878 | 0.004136 |
| PE(P-18:1_17:1) | 0.57335469 | 1.53729 | 0.000359 |
| PE(O-18:0_16:0) | 0.48082596 | 1.68773 | 0.000005 |
| PE(P-16:0_22:1) | 0.54997284 | 1.09307 | 0.046479 |
| PC(O-18:1_24:1) | 0.75508887 | 1.27545 | 0.013621 |
| PE(O-16:1_16:0) | 0.39369906 | 1.60044 | 0.000129 |
| PE(P-18:1_18:2) | 0.74955434 | 1.15279 | 0.049521 |
| PC(O-16:0_22:0) | 0.72918706 | 1.24518 | 0.021627 |
| PC(O-16:0_14:1) | 0.69014114 | 1.25288 | 0.019863 |
| SM(d18:0/20:0)  | 3.21539178 | 1.20371 | 0.01915  |
| PC(O-18:1_16:0) | 0.5936472  | 1.39263 | 0.003407 |
| PC(O-18:0_20:4) | 0.6717306  | 1.49074 | 0.000868 |
| PE(P-17:0_22:5) | 0.54628966 | 1.18242 | 0.007331 |
| PE(P-18:0_22:1) | 0.72710393 | 1.19057 | 0.028249 |
| PE(P-18:1_18:1) | 0.75873123 | 1.31481 | 0.009258 |
| PE(P-16:0_18:2) | 0.79477613 | 1.375   | 0.004278 |
| SM(d18:0/14:0)  | 0.73554695 | 1.33304 | 0.00859  |
| PE(P-18:0_24:5) | 0.42298628 | 1.16289 | 0.025841 |
| DG(18:1_22:4)   | 1.57541863 | 1.40848 | 0.002457 |
| PA(18:0_20:3)   | 0.70090467 | 1.52834 | 0.000515 |
| PA(18:1_26:1)   | 0.75403867 | 1.17751 | 0.033046 |
| PA(18:1_20:2)   | 0.76631489 | 1.2153  | 0.021604 |
| DG(18:1_20:1)   | 0.66229972 | 1.27858 | 0.009709 |
| DG(18:0_20:2)   | 0.7168531  | 1.25961 | 0.016993 |
| DG(18:1_22:1)   | 0.78076919 | 1.19852 | 0.032124 |

|                     |            |         |          |
|---------------------|------------|---------|----------|
| LPC(0:0/20:1)       | 0.40196986 | 1.48669 | 0.001062 |
| SHexCer(d18:1/16:0) | 0.72202277 | 1.42883 | 0.002098 |
| LPE(20:3/0:0)       | 0.27579948 | 1.62002 | 0.03598  |
| LPC(0:0/18:1)       | 0.48385464 | 1.48983 | 0.001026 |
| LPE(0:0/16:0)       | 2.68334022 | 1.07132 | 0.00134  |
| PG(18:0_18:1)       | 0.47557003 | 1.65101 | 0.000021 |
| PE(P-20:3_18:1)     | 1.60861514 | 1.16598 | 0.044508 |
| PE(P-19:0_20:4)     | 0.75579317 | 1.34751 | 0.004914 |
| PE(P-20:2_22:4)     | 0.72493755 | 1.21612 | 0.027162 |
| PE(P-18:1_24:4)     | 0.65515862 | 1.4662  | 0.001216 |
| PE(P-18:1_22:5)     | 1.5552022  | 1.16711 | 0.037831 |
| PE(P-18:2_22:6)     | 0.74080739 | 1.10499 | 0.047461 |
| PE(P-20:2_22:6)     | 3.70703294 | 1.18649 | 0.034356 |
| DG(18:0_20:1)       | 0.22887582 | 1.17944 | 0.000782 |
| PE(P-18:0_24:4)     | 0.62390693 | 1.10698 | 0.034264 |
| PE(P-18:1_22:3)     | 4.65060241 | 1.58758 | 0.029165 |
| DG(12:0_20:0)       | 0.59072988 | 1.38642 | 0.004669 |
| Cer(d18:2/21:0)     | 0.56616546 | 1.4645  | 0.001434 |
| DG(16:1_18:0)       | 0.59829456 | 1.43468 | 0.002153 |
| DG(15:0_18:1)       | 0.38738636 | 1.45824 | 0.000842 |
| Cer(d18:2/24:1)     | 0.60859124 | 1.47146 | 0.00126  |
| DG(14:0_18:1)       | 0.66518906 | 1.46873 | 0.001129 |
| DG(16:0_20:1)       | 0.62029985 | 1.50482 | 0.000695 |
| DG(16:0_20:2)       | 0.71143451 | 1.28161 | 0.040936 |
| DG(18:0_18:1)       | 0.52757879 | 1.45356 | 0.001791 |
| DG(18:1_24:0)       | 0.64649763 | 1.31947 | 0.011084 |
| DG(16:0_18:1)       | 0.7898315  | 1.26431 | 0.014045 |
| DG(16:1_18:1)       | 0.10116531 | 1.12687 | 0.000097 |
| (±)15-HETE          | 2.00699007 | 1.61711 | 0.000141 |
| PE(O-18:1_21:1)     | 1.52365813 | 1.19428 | 0.024399 |
| PE(O-20:1_20:1)     | 1.71042489 | 1.6863  | 0.000032 |
| PE(O-18:1_18:0)     | 0.78502189 | 1.14049 | 0.03437  |
| PE(O-18:0_20:1)     | 0.71428784 | 1.71568 | 0.000004 |
| PE(O-20:1_18:1)     | 1.61430972 | 1.26233 | 0.014942 |
| TXB2                | 2.08027194 | 1.75219 | 0.000003 |
| PE(O-20:0_18:1)     | 0.64738071 | 1.37866 | 0.003733 |
| PE(O-16:1_16:1)     | 0.76746636 | 1.14553 | 0.030601 |
| PE(O-16:1_18:1)     | 0.71276473 | 1.55569 | 0.000254 |
| PE(O-17:1_18:1)     | 0.69764008 | 1.61243 | 0.000129 |
| PE(O-18:1_18:1)     | 1.5258216  | 1.08118 | 0.042219 |
| PE(O-16:1_20:1)     | 1.61861667 | 1.15474 | 0.025216 |
| PS(18:1_20:0)       | 0.73972403 | 1.39904 | 0.018904 |
| PS(18:1_20:1)       | 2.54147887 | 1.4443  | 0.001654 |
| Cer(d22:0/18:1)     | 0.746063   | 1.33692 | 0.007786 |
| PE(O-16:0_20:3)     | 1.54385126 | 1.68236 | 0.000269 |
| PE(O-20:1_18:2)     | 0.6915054  | 1.32222 | 0.006881 |
| PE(O-18:2_22:1)     | 0.65898865 | 1.39009 | 0.003359 |
| PE(O-18:2_19:1)     | 1.56672058 | 1.72754 | 0.000021 |
| PE(O-18:1_22:2)     | 0.55953706 | 1.67912 | 0.000008 |
| PE(O-16:1_20:3)     | 0.67799671 | 1.52056 | 0.000635 |
| PE(O-18:2_18:2)     | 0.71721664 | 1.18883 | 0.048357 |
| PE(O-18:2_22:5)     | 0.79003228 | 1.23924 | 0.017407 |
| PS(16:0_20:1)       | 4.16725172 | 1.11911 | 0.02998  |
| PE(O-19:1_22:6)     | 0.56340249 | 1.4006  | 0.018492 |

|                    |            |         |          |
|--------------------|------------|---------|----------|
| PE(O-20:2_22:6)    | 0.71300293 | 1.20462 | 0.017398 |
| PE(O-18:2_22:6)    | 0.21499169 | 1.71149 | 0.031402 |
| LNAPE(16:0/N-18:1) | 0.60488432 | 1.06492 | 0.046735 |
| PMeOH(18:0_18:1)   | 0.52448534 | 1.50214 | 0.00077  |
| FFA(16:1)          | 0.462569   | 1.5941  | 0.000108 |
| PC(14:1_18:1)      | 0.66515691 | 1.31352 | 0.007287 |
| LPS(22:5/0:0)      | 0.12566558 | 1.56282 | 0.00129  |
| LNAPE(22:6/N-20:1) | 0.62903675 | 1.41687 | 0.002463 |
| PC(18:0_22:1)      | 0.48660415 | 1.10276 | 0.013815 |
| PC(15:1_18:1)      | 0.72423803 | 1.36002 | 0.004314 |
| PE(17:2_20:3)      | 0.51493564 | 1.54763 | 0.00031  |
| PE(18:2_22:5)      | 0.51797451 | 1.30657 | 0.009642 |
| PE(18:0_22:1)      | 0.64225782 | 1.37561 | 0.003997 |
| PG(16:0_20:1)      | 0.49483911 | 1.35597 | 0.004573 |
| LPG(16:1/0:0)      | 0.46138544 | 1.54292 | 0.000349 |
| LPI(20:4/0:0)      | 0.43048446 | 1.55981 | 0.000236 |
| LNAPE(16:1/N-16:0) | 0.69141618 | 1.37715 | 0.003952 |
| PE(16:0_19:2)      | 0.64176409 | 1.47117 | 0.00125  |
| PE(24:0_20:4)      | 0.65542546 | 1.226   | 0.01995  |
| PG(18:1_18:3)      | 0.65129265 | 1.15952 | 0.031822 |
| PS(18:0_20:0)      | 1.72411408 | 1.26655 | 0.010175 |
| PS(18:1_22:4)      | 0.51093721 | 1.41752 | 0.002781 |
| PS(18:1_24:4)      | 0.61359969 | 1.17499 | 0.030457 |
| PS(18:2_20:5)      | 0.57275986 | 1.46894 | 0.001362 |
| PI(15:0_21:1)      | 0.57909754 | 1.19435 | 0.038323 |
| PI(15:0_19:2)      | 0.47453473 | 1.41898 | 0.002907 |
| PC(18:1_20:0)      | 0.4537661  | 1.52997 | 0.000485 |
| PC(18:1_22:0)      | 0.29590289 | 1.59296 | 0.000109 |
| PC(24:0_18:1)      | 0.29308808 | 1.63003 | 0.000041 |
| PA(18:0_21:0)      | 0.5214164  | 1.47377 | 0.001249 |
| PC(17:0_18:2)      | 0.34067347 | 1.71624 | 0.000001 |
| PC(18:1_22:1)      | 0.40402062 | 1.63169 | 0.000039 |
| PG(18:1_20:3)      | 0.48833626 | 1.52707 | 0.000494 |
| PA(22:1_18:2)      | 0.47192115 | 1.42757 | 0.002532 |
| PA(20:1_22:4)      | 0.63050719 | 1.15839 | 0.04139  |
| Carnitine C4-OH    | 4.84346642 | 1.03573 | 0.017863 |
| PA(20:1_18:2)      | 0.78599429 | 1.63092 | 0.000055 |
| PA(20:1_20:3)      | 0.59313099 | 1.64853 | 0.000022 |
| PA(20:0_22:6)      | 0.77607362 | 1.3363  | 0.006738 |
| Carnitine C2:0     | 0.62460606 | 1.38403 | 0.004257 |
| PA(20:3_22:5)      | 0.7346619  | 1.49522 | 0.00081  |
| Carnitine C14:0    | 0.67894959 | 1.5517  | 0.000436 |
| Carnitine C16-OH   | 0.68031713 | 1.72465 | 0.000001 |
| Carnitine C3:1-2OH | 0.57170663 | 1.69517 | 0.000011 |
| Carnitine C14:1    | 0.66964981 | 1.52297 | 0.000632 |
| PC(20:1_20:3)      | 0.47709736 | 1.6909  | 0.002009 |
| Carnitine C4:1-2OH | 0.67989713 | 1.6788  | 0.000012 |
| Carnitine C16:1    | 0.63266665 | 1.73013 | 0.000002 |
| Carnitine C16:1-OH | 0.7883598  | 1.58759 | 0.000151 |
| Carnitine C18:1-OH | 0.72835455 | 1.27544 | 0.013262 |
| Carnitine C18:2    | 0.58407808 | 1.48596 | 0.001067 |
| DG(18:0_18:2)      | 0.67690692 | 1.37104 | 0.004365 |
| PE(20:1_18:0)      | 0.41326083 | 1.54467 | 0.000345 |
| HexCer(d18:1/17:0) | 0.72547335 | 1.27619 | 0.015466 |



|                         |            |         |          |
|-------------------------|------------|---------|----------|
| DG(18:1_18:1)           | 2.90710102 | 1.13366 | 0.030436 |
| PE(18:1_16:1)           | 0.46074074 | 1.52385 | 0.000477 |
| PE(22:0_18:1)           | 0.39773259 | 1.62351 | 0.000048 |
| DG(16:0_20:3)           | 1.93925202 | 1.52125 | 0.008594 |
| PS(18:0_20:3)           | 0.36322466 | 1.63879 | 0.000031 |
| HexCer(d18:1/22:0)      | 0.54166718 | 1.46022 | 0.001615 |
| HexCer(d18:1/20:0)      | 1.53303965 | 1.13432 | 0.048983 |
| HexCer(d18:1/24:0)      | 0.79686137 | 1.57593 | 0.000158 |
| PS(16:0_20:5)           | 0.44338153 | 1.60566 | 0.000083 |
| PA(16:0_16:0)           | 0.32016213 | 1.67456 | 0.000009 |
| HexCer(d18:1/23:0)      | 0.65688996 | 1.5996  | 0.000098 |
| HexCer(d18:1/25:0)      | 0.68039216 | 1.32064 | 0.012552 |
| HexCer(d18:2/22:0)      | 0.59034747 | 1.30746 | 0.007761 |
| HexCer(d18:2/24:0)      | 0.43113065 | 1.19298 | 0.000217 |
| TG(16:0_18:0_20:1)      | 0.38724463 | 1.48155 | 0.001186 |
| PE(20:1_18:1)           | 0.38275616 | 1.51455 | 0.000634 |
| SM(d18:1/19:0)          | 0.58518429 | 1.52731 | 0.000464 |
| SM(d18:1/21:0)          | 0.50032362 | 1.51519 | 0.000561 |
| SM(d18:1/23:0)          | 0.53171687 | 1.49183 | 0.000966 |
| TG(14:1_16:0_16:1)      | 0.40294925 | 1.49616 | 0.000902 |
| SM(d18:1/26:1)          | 0.361635   | 1.43887 | 0.002323 |
| TG(17:0_18:1_18:1)      | 0.32656027 | 1.46822 | 0.001508 |
| SM(d18:1/25:0)          | 0.75602894 | 1.16628 | 0.04005  |
| TG(14:0_18:3_20:4)      | 0.52106886 | 1.51136 | 0.000644 |
| TG(16:0_18:2_20:5)      | 0.52812794 | 1.56924 | 0.000204 |
| TG(17:1_17:1_24:6)      | 0.37817413 | 1.48386 | 0.001131 |
| SM(d18:1/18:1)          | 0.58780481 | 1.36217 | 0.004198 |
| TG(16:0_16:1_22:6)      | 0.51184917 | 1.58262 | 0.00014  |
| PE(19:0_18:2)           | 0.46960252 | 1.537   | 0.000419 |
| TG(16:0_14:1_18:2)      | 0.61481135 | 1.17196 | 0.04621  |
| Carnitine C20:3         | 0.72617247 | 1.38629 | 0.004776 |
| TG(16:0_16:0_16:1)      | 0.71091134 | 1.24591 | 0.016575 |
| DG(22:0_18:1)           | 1.61631313 | 1.23366 | 0.039095 |
| DG(24:0_18:1)           | 4.71484651 | 1.36092 | 0.004832 |
| DG(18:2_20:2)           | 0.73541917 | 1.14121 | 0.047846 |
| Cer(t18:0/20:0(2OH))    | 0.74876848 | 1.42219 | 0.002861 |
| SM(d18:2/24:2)          | 0.64485116 | 1.39155 | 0.004296 |
| MGDG(14:0_16:0)         | 0.61993113 | 1.47713 | 0.001139 |
| MGDG(16:0_16:1)         | 0.4292687  | 1.40325 | 0.003304 |
| Cer(d18:0/22:0(2OH))    | 0.76594114 | 1.3193  | 0.008076 |
| BMP(18:1_20:4)          | 0.54587282 | 1.62275 | 0.000052 |
| MGDG(16:0_16:0)         | 0.55301358 | 1.3261  | 0.009549 |
| MGDG(16:0_18:1)         | 0.48283241 | 1.43542 | 0.002092 |
| MGDG(16:1_18:1)         | 0.55590972 | 1.4025  | 0.002801 |
| MGDG(18:1_18:1)         | 0.64730231 | 1.57236 | 0.000187 |
| PI(18:0_17:1)           | 0.09927426 | 1.53347 | 0.000518 |
| Cer(d18:2/22:1)         | 0.76273316 | 1.26384 | 0.038626 |
| HexCer(t19:1/26:1(2OH)) | 0.75496689 | 1.23601 | 0.009805 |
| Cer(d17:1/16:0)         | 4.43301529 | 1.01004 | 0.000938 |
| Cer(d18:2/25:1)         | 0.51704427 | 1.07873 | 0.006384 |
| Cer(t17:2/25:0)         | 0.18255588 | 1.18183 | 0.002764 |
| Cer(d17:1/20:0)         | 0.33701987 | 1.37594 | 0.000136 |
| Cer(t17:1/20:0)         | 0.60486635 | 1.174   | 0.036594 |
| Cer(t17:1/22:0)         | 1.66059258 | 1.15132 | 0.028526 |

|                         |            |         |          |
|-------------------------|------------|---------|----------|
| HexCer(d17:1/18:0)      | 0.35289923 | 1.01599 | 0.000446 |
| Cer(d18:1/22:0(2OH))    | 34.9943117 | 1.28166 | 0.01253  |
| Cer(t17:2/24:1)         | 0.65719153 | 1.24364 | 0.029285 |
| Cer(d23:0/18:1)         | 147.888889 | 1.15685 | 0.029282 |
| TG(18:3_20:4_20:4)      | 0.6280877  | 1.12391 | 0.014163 |
| HexCer(t17:2/18:0(2OH)) | 0.7926869  | 1.32845 | 0.012637 |
| Cer(t16:1/27:0)         | 1.63088701 | 1.432   | 0.00246  |
| Cer(d18:1/18:0(2OH))    | 2.7861124  | 1.31457 | 0.039844 |
| PI(18:0_20:1)           | 4.52022506 | 1.5522  | 0.000383 |
| PE(O-16:1_21:1)         | 1.60059484 | 1.40969 | 0.005879 |
| PE(O-18:1_20:1)         | 1.58567841 | 1.33617 | 0.008124 |
| PE(O-16:1_22:1)         | 1.65610689 | 1.16704 | 0.035987 |
| SM(d18:0/22:0)          | 0.66848301 | 1.23165 | 0.018574 |
| SM(d18:1/25:1)          | 0.64091637 | 1.27794 | 0.02934  |
| TG(18:2_18:2_20:1)      | 0.53864458 | 1.53849 | 0.000385 |
| PE(O-16:0_18:1)         | 0.40119456 | 1.51171 | 0.000659 |
| SM(d18:1/21:1)          | 0.38564624 | 1.4061  | 0.003669 |
| PE(20:1_18:2)           | 0.49432774 | 1.51906 | 0.000555 |
| PG(18:0_16:0)           | 0.40471524 | 1.50094 | 0.000847 |
| PE(18:1_22:1)           | 0.23076922 | 1.55254 | 0.000307 |
| TG(16:1_18:2_18:3)      | 0.56189974 | 1.56087 | 0.000254 |
| TG(16:0_16:1_17:1)      | 0.57814287 | 1.50409 | 0.000723 |
| TG(16:0_18:2_22:6)      | 0.35386962 | 1.37593 | 0.005591 |
| TG(15:0_16:0_18:0)      | 4.61201938 | 1.45138 | 0.001212 |
| PE(20:3_18:0)           | 0.28367716 | 1.5194  | 0.000577 |
| PE(P-16:0_20:1)         | 2.45549133 | 1.36844 | 0.018359 |
| SM(d18:1/24:1)          | 0.62067377 | 1.46123 | 0.001604 |
| PE(P-20:0_18:1)         | 0.54371069 | 1.49511 | 0.000848 |
| SM(d18:2/23:1)          | 0.45098889 | 1.40367 | 0.003799 |
| PE(P-16:0_24:2)         | 0.52630164 | 1.31423 | 0.010851 |
| TG(16:1_16:1_18:1)      | 0.53910046 | 1.26507 | 0.016586 |
| PE(P-16:0_22:0)         | 0.2427682  | 1.48744 | 0.001026 |
| PE(P-18:0_20:1)         | 0.70174316 | 1.2968  | 0.009726 |
| TG(18:2_18:2_22:6)      | 0.50356295 | 1.49804 | 0.000844 |
| PE(P-16:0_22:3)         | 0.51541964 | 1.51925 | 0.00055  |
| PE(P-18:1_20:0)         | 0.71684731 | 1.22069 | 0.015104 |
| PE(P-18:1_19:1)         | 0.6418511  | 1.25644 | 0.021665 |
| Carnitine C20:4         | 0.52206738 | 1.17766 | 0.046281 |
| TG(16:1_18:1_18:2)      | 0.62494073 | 1.14956 | 0.048122 |
| PE(P-18:1_24:2)         | 0.53562803 | 1.3784  | 0.005085 |
| Carnitine C22:4         | 0.7238793  | 1.24918 | 0.021652 |
| PE(P-18:1_22:1)         | 0.65677978 | 1.37332 | 0.004928 |
| PE(P-20:0_20:3)         | 0.42839951 | 1.41994 | 0.002398 |
| TG(16:0_18:2_18:3)      | 0.57724851 | 1.26344 | 0.018242 |
| PE(P-18:1_14:0)         | 0.58672882 | 1.23697 | 0.026105 |
| PE(P-18:1_16:1)         | 0.76356143 | 1.30701 | 0.009252 |
| PE(P-16:0_16:0)         | 0.6499715  | 1.43511 | 0.002205 |
| PE(P-17:0_18:1)         | 0.66235807 | 1.40489 | 0.003401 |
| PE(P-16:0_20:3)         | 0.60758425 | 1.36942 | 0.005662 |
| PE(P-18:2_16:1)         | 0.76111503 | 1.31961 | 0.009106 |
| PE(P-18:0_24:3)         | 0.64779874 | 1.25489 | 0.019503 |
| PE(P-18:0_18:2)         | 0.77997957 | 1.21546 | 0.022402 |
| PE(P-18:2_18:1)         | 0.79026453 | 1.21246 | 0.020046 |
| PC(15:1_22:4)           | 0.55218077 | 1.36371 | 0.004134 |

|                      |            |         |           |
|----------------------|------------|---------|-----------|
| PC(16:0_22:0)        | 0.340422   | 1.63731 | 0.000037  |
| PC(16:0_26:0)        | 0.21902491 | 1.64959 | 0.000902  |
| PG(20:4_20:4)        | 0.23231884 | 1.38858 | 0.000886  |
| PE(O-18:1_18:2)      | 0.62837896 | 1.24671 | 0.018495  |
| PE(O-20:1_22:5)      | 0.47303189 | 1.32645 | 0.009408  |
| LPC(24:2)            | 6.27710535 | 1.47086 | 0.001425  |
| PS(18:0_16:1)        | 0.52233229 | 1.34857 | 0.00262   |
| PE(16:1_16:0)        | 0.3821827  | 1.70078 | 0.000005  |
| PE(16:0_18:1)        | 0.44472426 | 1.58385 | 0.000142  |
| PE(16:1_18:0)        | 0.44674611 | 1.61458 | 0.000064  |
| PE(20:1_16:0)        | 0.42171986 | 1.57862 | 0.000158  |
| Cer(d18:0/16:0)      | 0.5303681  | 1.6466  | 0.00004   |
| PE(18:1_18:0)        | 0.48       | 1.61934 | 0.000058  |
| Carnitine C5-OH      | 0.09007748 | 1.25211 | 0.000369  |
| PE(O-20:0_20:4)      | 0.48910291 | 1.45995 | 0.001676  |
| PE(O-20:0_22:4)      | 0.7237255  | 1.29483 | 0.029905  |
| PE(O-18:1_22:1)      | 1.67755656 | 1.72962 | 0.000023  |
| PE(O-17:2_18:1)      | 0.53495667 | 1.14863 | 0.000804  |
| PE(O-18:2_24:1)      | 0.70106476 | 1.17171 | 0.044856  |
| PE(O-18:2_20:2)      | 0.68502261 | 1.32513 | 0.006676  |
| PA(16:0_20:1)        | 0.61919787 | 1.16746 | 0.031713  |
| PA(20:0_18:2)        | 0.56399513 | 1.32595 | 0.008295  |
| PC(16:0_22:1)        | 2.21378261 | 1.65274 | 0.001215  |
| Cer(d18:2/23:1(2OH)) | 0.58570511 | 1.37778 | 0.000918  |
| PE(O-17:1_20:4)      | 0.69409857 | 1.19387 | 0.019358  |
| PE(O-17:1_22:4)      | 0.63490669 | 1.31342 | 0.030254  |
| PE(O-22:1_20:4)      | 0.55567502 | 1.27278 | 0.015555  |
| PE(O-17:2_20:4)      | 0.60143366 | 1.46315 | 0.001272  |
| PE(O-18:0_22:6)      | 0.50833812 | 1.40898 | 0.003642  |
| PE(O-18:2_18:1)      | 1.75491832 | 1.78712 | <0.000001 |
| PE(O-18:2_20:1)      | 2.80464944 | 1.01082 | 0.003434  |
| PE(O-18:3_18:1)      | 0.56767677 | 1.45424 | 0.00157   |
| PE(O-18:0_22:4)      | 0.62880663 | 1.43017 | 0.001915  |

supplemental Table 3

| Compounds       | VIP     | FC(S/C)     | P value   |
|-----------------|---------|-------------|-----------|
| LPI(20:3/0:0)   | 1.09794 | 0.551501479 | 0.017983  |
| LPI(20:4/0:0)   | 1.27284 | 0.704083427 | 0.003702  |
| PC(18:0_18:0)   | 1.53583 | 1.851769973 | 0.000009  |
| PC(16:0_22:1)   | 1.29269 | 1.769791622 | 0.002881  |
| PC(18:1_20:0)   | 1.29786 | 5.613076118 | 0.002437  |
| PC(16:1_16:1)   | 1.30086 | 0.397707406 | 0.002363  |
| PC(16:1_18:1)   | 1.19735 | 0.625477673 | 0.007415  |
| PC(17:1_18:1)   | 1.11018 | 0.336794452 | 0.016333  |
| PC(17:0_20:3)   | 1.36204 | 0.516282999 | 0.000913  |
| PC(20:1_18:2)   | 1.28907 | 1.852274673 | 0.002954  |
| PC(20:2_18:1)   | 1.32836 | 1.478691136 | 0.001988  |
| PC(18:2_22:1)   | 1.09996 | 1.843207853 | 0.019608  |
| PC(16:1_18:3)   | 1.2187  | 0.624417266 | 0.006395  |
| PC(18:2_18:2)   | 1.14416 | 1.440682638 | 0.013242  |
| PC(18:0_22:4)   | 1.11917 | 1.31335633  | 0.015791  |
| PC(18:2_20:3)   | 1.41422 | 0.731053795 | 0.000346  |
| PC(20:1_20:4)   | 1.09769 | 1.522250831 | 0.017864  |
| PC(20:2_20:4)   | 1.45567 | 2.414624185 | 0.000126  |
| PC(20:3_20:4)   | 1.04195 | 0.767456573 | 0.030034  |
| PE(18:2_16:0)   | 1.18313 | 1.378692776 | 0.013895  |
| PE(18:0_18:2)   | 1.31108 | 1.446678076 | 0.002274  |
| PE(20:2_16:0)   | 1.45422 | 1.834103785 | 0.00015   |
| PE(19:0_18:2)   | 1.17027 | 1.428401506 | 0.016351  |
| PE(20:2_18:0)   | 1.08792 | 1.697890226 | 0.020015  |
| PE(17:1_18:2)   | 1.01269 | 1.638237731 | 0.041098  |
| PE(18:1_18:2)   | 1.16873 | 1.396028935 | 0.012056  |
| PE(18:2_19:1)   | 1.31527 | 1.997674987 | 0.002144  |
| PE(17:0_20:3)   | 1.09619 | 1.219749736 | 0.029384  |
| PE(20:1_18:2)   | 1.22371 | 1.448112666 | 0.007664  |
| PE(18:2_18:2)   | 1.18975 | 2.349690595 | 0.008581  |
| PE(17:0_20:4)   | 1.09907 | 1.311179933 | 0.01802   |
| PE(17:0_20:5)   | 1.04832 | 1.554329021 | 0.046591  |
| PE(18:0_24:5)   | 1.11588 | 1.766653059 | 0.018772  |
| PE(15:0_22:6)   | 1.3511  | 1.873565222 | 0.001049  |
| PG(18:2_16:1)   | 1.16553 | 1.215059444 | 0.01834   |
| PG(16:1_20:4)   | 1.09717 | 0.523179269 | 0.00096   |
| PG(18:1_20:4)   | 1.16073 | 1.715945229 | 0.010063  |
| PI(18:1_18:2)   | 1.03061 | 2.138994186 | 0.000025  |
| PI(18:1_22:6)   | 1.05821 | 1.28797342  | 0.040419  |
| PS(16:0_18:1)   | 1.27109 | 4.604663644 | 0.029935  |
| PS(22:4_18:0)   | 1.35674 | 2.588199335 | 0.003913  |
| PS(18:0_20:5)   | 1.58759 | 1.649458177 | 0.037741  |
| FFA(29:0)       | 1.37775 | 0.784586523 | 0.000613  |
| PE(O-18:0_16:0) | 1.19597 | 0.683953926 | 0.017513  |
| PE(O-20:0_18:1) | 1.56299 | 0.523919843 | 0.000226  |
| PE(O-16:0_22:3) | 1.56313 | 0.00091718  | <0.000001 |
| PE(O-18:2_22:1) | 1.09466 | 2.875098114 | 0.010546  |
| PE(O-18:2_24:2) | 1.09967 | 2.31694945  | 0.021631  |
| PE(O-20:0_22:4) | 1.03084 | 0.399637021 | 0.000271  |
| PE(O-17:1_22:4) | 1.49187 | 1.671608395 | 0.010683  |
| PE(O-20:1_22:4) | 1.03934 | 0.529468962 | 0.002902  |
| PE(O-18:0_22:6) | 1.12418 | 0.714777145 | 0.022726  |

|                    |         |             |          |
|--------------------|---------|-------------|----------|
| PE(O-22:0_22:6)    | 1.35632 | 0.807916103 | 0.030768 |
| PE(O-18:2_22:6)    | 1.27508 | 1.609404411 | 0.016276 |
| PE(O-20:2_22:6)    | 1.30367 | 0.724312262 | 0.015129 |
| LNAPE(22:6/N-20:4) | 1.26226 | 0.794645663 | 0.032557 |
| PC(15:0_15:1)      | 1.23165 | 1.575674248 | 0.003694 |
| PC(20:4_20:5)      | 1.34079 | 1.632823099 | 0.007664 |
| PE(12:0_22:4)      | 1.02889 | 0.643750214 | 0.008697 |
| PE(18:2_18:3)      | 1.06018 | 2.761177196 | 0.001052 |
| PE(22:3_20:4)      | 1.3573  | 2.019462451 | 0.032492 |
| PE(20:4_22:6)      | 1.18332 | 1.666848062 | 0.005496 |
| PG(14:0_16:0)      | 1.26965 | 0.310158686 | 0.03717  |
| PG(12:0_18:1)      | 1.15117 | 0.59929207  | 0.035872 |
| PG(17:0_22:1)      | 1.01316 | 1.853737076 | 0.001053 |
| PG(16:0_20:2)      | 1.11796 | 1.884221877 | 0.009189 |
| PG(9:0_22:4)       | 1.02703 | 0.719093321 | 0.001748 |
| PG(16:1_20:5)      | 1.2363  | 0.565338169 | 0.015111 |
| PG(20:0_22:6)      | 1.23999 | 0.656426723 | 0.007557 |
| PG(20:1_22:6)      | 1.28304 | 1.648672209 | 0.004612 |
| PG(20:4_20:4)      | 1.49606 | 1.767708351 | 0.040367 |
| PS(15:0_18:0)      | 1.02674 | 1.999223005 | 0.001216 |
| PS(16:0_17:0)      | 1.01235 | 0.770694608 | 0.038712 |
| PS(18:0_20:0)      | 1.06222 | 0.729496953 | 0.005519 |
| PS(17:0_18:1)      | 1.39154 | 0.260384976 | 0.004984 |
| PS(19:0_16:1)      | 1.28299 | 0.386019312 | 0.002046 |
| PS(17:1_18:1)      | 1.05366 | 2.129141313 | 0.004416 |
| PS(19:0_18:3)      | 1.21442 | 0.668837066 | 0.03693  |
| PS(19:1_20:4)      | 1.28813 | 0.218507297 | 0.015462 |
| PS(20:3_20:3)      | 1.06532 | 0.785874458 | 0.025203 |
| PA(18:0_22:4)      | 1.22385 | 1.576950118 | 0.03307  |
| PA(16:1_22:5)      | 1.50409 | 0.248629674 | 0.001396 |
| PA(20:4_22:5)      | 1.39715 | 0.686458798 | 0.024785 |
| Carnitine C5:0     | 1.40253 | 1.118362976 | 0.047067 |
| Carnitine C4-OH    | 1.15037 | 2.765533908 | 0.000023 |
| Carnitine C10:0    | 1.17985 | 10.41698812 | 0.006189 |
| Carnitine C15:0    | 1.44875 | 1784.596228 | 0.006576 |
| Carnitine C16-OH   | 1.13943 | 2.41199624  | 0.040964 |
| Carnitine C20:0    | 1.23904 | 7.289747199 | 0.013732 |
| Carnitine C3:1-2OH | 1.30286 | 2.694957437 | 0.000034 |
| Carnitine C5:1     | 1.5655  | 1.940687226 | 0.001608 |
| Carnitine C5:1-2OH | 1.01447 | 1.097636415 | 0.016309 |
| Carnitine C10:2    | 1.49296 | 0.39726701  | 0.000842 |
| CE(18:1)           | 1.0442  | 0.455268723 | 0.000151 |
| CE(24:1)           | 1.23668 | 0.649081234 | 0.001718 |
| CE(20:2)           | 1.12364 | 0.565382668 | 0.012701 |
| Cer(d18:1/17:0)    | 1.30014 | 2.170101722 | 0.000397 |
| DG(17:0_18:1)      | 1.06613 | 0.283022372 | 0.009688 |
| DG(16:0_20:1)      | 1.09969 | 0.526496748 | 0.044894 |
| DG(18:1_24:0)      | 1.18378 | 3.792565343 | 0.048129 |
| DG(16:0_20:2)      | 1.40989 | 0.733813034 | 0.01096  |
| DG(18:0_20:3)      | 1.55467 | 0.542599764 | 0.00264  |
| DG(16:1_20:3)      | 1.1149  | 0.359994054 | 0.000841 |
| DG(18:1_20:3)      | 1.00155 | 0.295991207 | 0.000355 |
| DG(18:0_20:4)      | 1.45203 | 0.641425242 | 0.019748 |
| DG(18:0_22:4)      | 1.35273 | 0.632849075 | 0.024328 |

|                     |         |             |           |
|---------------------|---------|-------------|-----------|
| HexCer(d18:1/16:0)  | 1.18782 | 2.871822248 | 0.000004  |
| HexCer(d18:1/24:0)  | 1.48875 | 1.79372954  | 0.000158  |
| SHexCer(d18:1/16:0) | 1.25578 | 1.414561723 | 0.004162  |
| LPC(14:0/0:0)       | 1.51448 | 0.334390116 | 0.000005  |
| LPC(16:0/0:0)       | 1.24719 | 0.527259107 | <0.000001 |
| LPC(0:0/17:0)       | 1.3845  | 0.700227297 | 0.005649  |
| LPC(17:0/0:0)       | 1.31836 | 0.71655041  | 0.008803  |
| LPC(18:0/0:0)       | 1.53136 | 0.684751417 | 0.000153  |
| LPC(20:0/0:0)       | 1.53312 | 0.517207364 | 0.000051  |
| LPC(16:1/0:0)       | 1.55789 | 0.318465709 | 0.000011  |
| LPC(0:0/18:1)       | 1.2179  | 0.585211719 | 0.000417  |
| LPC(18:1/0:0)       | 1.31978 | 0.477487112 | 0.000313  |
| LPC(20:1/0:0)       | 1.18813 | 0.681204707 | 0.028435  |
| LPC(18:3/0:0)       | 1.49128 | 0.527525246 | 0.000019  |
| LPC(18:4/0:0)       | 1.28982 | 0.305813417 | 0.000022  |
| LPC(O-14:0)         | 1.45225 | 0.50614826  | 0.000012  |
| LPC(O-16:0)         | 1.42569 | 1.266198967 | 0.002342  |
| LPC(O-20:0)         | 1.43842 | 0.233276839 | <0.000001 |
| LPC(O-14:1)         | 1.01476 | 0.430162095 | 0.000024  |
| LPC(O-18:1)         | 1.03445 | 1.331335569 | 0.00366   |
| LPC(O-20:1)         | 1.50075 | 0.452225627 | 0.000003  |
| LPE(17:0/0:0)       | 1.55548 | 0.5091513   | 0.001709  |
| LPE(0:0/18:0)       | 1.56183 | 0.424432885 | 0.000135  |
| LPE(16:1/0:0)       | 1.19573 | 0.319733126 | 0.000007  |
| LPE(17:1/0:0)       | 1.22418 | 0.405808092 | 0.000594  |
| LPE(18:1/0:0)       | 1.43021 | 0.429006256 | 0.000047  |
| LPE(18:2/0:0)       | 1.36536 | 0.661489212 | 0.016299  |
| LPE(0:0/20:3)       | 1.61972 | 0.469647848 | 0.000143  |
| LPE(20:3/0:0)       | 1.0248  | 0.471757952 | 0.000268  |
| LPE(20:4/0:0)       | 1.00357 | 0.591539249 | 0.0002    |
| LPE(20:5/0:0)       | 1.40178 | 0.662249641 | 0.037657  |
| LPE(0:0/22:5)       | 1.21623 | 0.626207337 | 0.017712  |
| LPE(22:5/0:0)       | 1.44793 | 0.521488948 | 0.031503  |
| PC(16:0_16:1)       | 1.49134 | 0.579696472 | 0.008385  |
| PC(16:0_18:1)       | 1.09908 | 0.741515053 | 0.006416  |
| PC(19:0_18:2)       | 1.45823 | 1.750152853 | 0.000042  |
| PC(18:0_20:2)       | 1.55473 | 1.451279598 | 0.001141  |
| PC(16:0_18:3)       | 1.40966 | 0.661849567 | 0.002354  |
| PC(17:1_18:2)       | 1.55776 | 1.421074721 | 0.004497  |
| PC(20:4_17:0)       | 1.47587 | 1.613865568 | 0.001259  |
| PC(18:0_20:4)       | 1.01199 | 1.270879962 | 0.000483  |
| PC(19:0_20:4)       | 1.2496  | 1.595888656 | 0.006519  |
| PC(16:0_20:5)       | 1.05843 | 0.747147491 | 0.044102  |
| PC(15:1_22:5)       | 1.10091 | 1.462012154 | 0.010587  |
| PC(O-20:0_20:4)     | 1.19812 | 1.555765311 | 0.004512  |
| PC(O-20:1_20:4)     | 1.03503 | 0.788154621 | 0.024475  |
| PE(P-18:1_22:6)     | 1.54274 | 1.702767484 | 0.031301  |
| SM(d18:1/19:1)      | 1.19594 | 0.818516878 | 0.023167  |
| SM(d18:1/22:1)      | 1.25967 | 0.67765613  | 0.004968  |
| SM(d18:1/23:1)      | 1.20915 | 0.649951802 | 0.000659  |
| SM(d18:2/20:1)      | 1.23012 | 1.623392523 | 0.0031    |
| TG(16:0_16:0_17:0)  | 1.20963 | 0.39721356  | 0.021306  |
| TG(15:0_16:0_18:1)  | 1.5015  | 0.310359648 | 0.008863  |
| TG(16:0_17:0_18:1)  | 1.49305 | 0.150668687 | 0.000419  |

|                    |         |             |           |
|--------------------|---------|-------------|-----------|
| TG(17:0_18:0_18:1) | 1.47957 | 0.253581119 | 0.000737  |
| TG(17:0_17:0_19:1) | 1.51959 | 0.212676192 | 0.00063   |
| TG(16:0_18:0_20:1) | 1.46608 | 0.23588296  | 0.000171  |
| TG(18:0_18:0_18:1) | 1.48671 | 0.33119158  | 0.007071  |
| TG(16:0_24:0_18:1) | 1.52718 | 0.604621816 | 0.043851  |
| TG(18:0_20:1_22:0) | 1.45647 | 0.640090587 | 0.03507   |
| TG(9:0_16:0_18:2)  | 1.23132 | 0.677220891 | 0.015867  |
| TG(16:0_16:1_18:1) | 1.02334 | 0.236915231 | 0.003381  |
| TG(14:0_18:0_18:2) | 1.27278 | 0.329452681 | 0.016205  |
| TG(16:0_17:1_18:1) | 1.26402 | 0.154395727 | 0.000263  |
| TG(15:0_17:0_19:2) | 1.46922 | 0.168616029 | 0.000045  |
| TG(16:0_18:1_18:1) | 1.44368 | 0.210205066 | 0.000035  |
| TG(16:0_18:0_18:2) | 1.343   | 0.322737958 | 0.004518  |
| TG(16:0_16:1_20:1) | 1.49987 | 0.193644593 | 0.000045  |
| TG(17:0_18:1_18:1) | 1.53534 | 0.105345085 | 0.000016  |
| TG(16:0_18:1_19:1) | 1.55385 | 0.103215837 | 0.000068  |
| TG(18:0_18:1_18:1) | 1.51754 | 0.197868055 | 0.00002   |
| TG(16:0_18:1_20:1) | 1.57043 | 0.137093266 | 0.000103  |
| TG(16:1_18:0_20:1) | 1.52468 | 0.136342041 | 0.000055  |
| TG(15:0_18:1_22:1) | 1.47399 | 0.229427605 | 0.000452  |
| TG(18:0_18:1_19:1) | 1.42449 | 0.184160749 | 0.000226  |
| TG(18:0_18:1_20:1) | 1.5235  | 0.144984608 | 0.000013  |
| TG(18:0_18:2_20:0) | 1.29339 | 0.177770824 | 0.000131  |
| TG(16:0_18:1_22:1) | 1.58734 | 0.230808901 | 0.000234  |
| TG(18:0_22:0_18:2) | 1.259   | 0.460554564 | 0.00534   |
| TG(23:0_18:1_18:1) | 1.34449 | 0.406447957 | 0.001073  |
| TG(16:0_14:1_18:2) | 1.29099 | 0.37495434  | 0.014074  |
| TG(16:1_16:1_17:1) | 1.3221  | 0.431286835 | 0.042211  |
| TG(15:0_16:1_18:2) | 1.31542 | 0.445515746 | 0.023499  |
| TG(16:1_16:1_18:1) | 1.57837 | 0.403780823 | 0.034119  |
| TG(16:0_16:1_18:2) | 1.41893 | 0.300458397 | 0.003414  |
| TG(16:1_17:1_18:1) | 1.43216 | 0.2658726   | 0.003651  |
| TG(15:0_18:1_18:2) | 1.52135 | 0.307044341 | 0.000099  |
| TG(16:0_17:1_18:2) | 1.49571 | 0.197385741 | 0.000179  |
| TG(16:1_18:1_18:1) | 1.51781 | 0.262851325 | 0.001271  |
| TG(16:0_18:1_18:2) | 1.55526 | 0.3406259   | 0.000039  |
| TG(14:0_18:1_20:2) | 1.54147 | 0.409675325 | 0.007607  |
| TG(17:1_18:1_18:1) | 1.62066 | 0.168551897 | 0.000009  |
| TG(17:0_18:1_18:2) | 1.32483 | 0.199032026 | 0.000004  |
| TG(18:1_18:1_18:1) | 1.53163 | 0.23314782  | 0.00002   |
| TG(18:0_18:1_18:2) | 1.50953 | 0.256793529 | 0.000001  |
| TG(16:0_18:1_20:2) | 1.47361 | 0.173397368 | 0.000015  |
| TG(17:1_18:1_20:1) | 1.36007 | 0.132271834 | 0.000897  |
| TG(18:1_18:1_19:1) | 1.43837 | 0.149451886 | 0.000082  |
| TG(18:1_18:1_20:1) | 1.29669 | 0.150222666 | 0.000015  |
| TG(16:1_18:1_22:1) | 1.29132 | 0.407319884 | 0.002618  |
| TG(20:1_18:2_18:0) | 1.02945 | 0.212765534 | <0.000001 |
| TG(18:1_18:2_22:0) | 1.51975 | 0.401834191 | 0.003801  |
| TG(18:1_20:1_20:1) | 1.34903 | 0.12984983  | 0.000023  |
| TG(18:1_20:1_22:1) | 1.32189 | 0.364564186 | 0.001262  |
| TG(16:1_16:1_16:2) | 1.40398 | 0.338710002 | 0.013377  |
| TG(14:0_18:2_18:2) | 1.32002 | 0.387113671 | 0.00266   |
| TG(16:1_16:1_18:2) | 1.3785  | 0.258862957 | 0.006149  |
| TG(14:0_16:0_20:4) | 1.3706  | 0.200953554 | 0.000037  |

|                    |         |             |           |
|--------------------|---------|-------------|-----------|
| TG(16:0_16:1_18:3) | 1.44538 | 0.212186226 | 0.002755  |
| TG(15:0_18:2_18:2) | 1.56905 | 0.44287862  | 0.001757  |
| TG(16:1_17:1_18:2) | 1.55645 | 0.296241778 | 0.001926  |
| TG(16:1_18:1_18:2) | 1.49194 | 0.382417195 | 0.000333  |
| TG(16:0_16:0_20:4) | 1.42493 | 0.194054847 | <0.000001 |
| TG(16:0_18:2_18:2) | 1.50543 | 0.369501162 | 0.000331  |
| TG(15:0_19:2_19:2) | 1.51917 | 0.19310641  | 0.000244  |
| TG(17:1_18:1_18:2) | 1.47717 | 0.246550413 | 0.000016  |
| TG(18:1_18:1_18:2) | 1.57458 | 0.296062438 | 0.000043  |
| TG(16:0_18:0_20:4) | 1.59587 | 0.332846904 | 0.00002   |
| TG(17:1_18:1_20:2) | 1.3753  | 0.190401705 | 0.000003  |
| TG(17:0_19:2_19:2) | 1.59766 | 0.109656325 | 0.000007  |
| TG(18:0_18:1_20:3) | 1.49723 | 0.114143359 | <0.000001 |
| TG(16:1_18:1_22:2) | 1.35763 | 0.362774017 | 0.001701  |
| TG(16:0_18:1_22:3) | 1.60389 | 0.086121022 | 0.000011  |
| TG(18:1_18:2_20:1) | 1.10419 | 0.294232427 | 0.000025  |
| TG(18:1_18:1_22:2) | 1.34288 | 0.295574864 | 0.000082  |
| TG(18:1_22:1_18:2) | 1.08993 | 0.367298131 | 0.000941  |
| TG(18:1_24:1_18:2) | 1.33624 | 0.403989938 | 0.000219  |
| TG(16:1_16:1_18:3) | 1.3988  | 0.217184164 | 0.002642  |
| TG(14:0_18:2_18:3) | 1.48531 | 0.332324713 | 0.002863  |
| TG(14:1_18:2_18:2) | 1.46077 | 0.482245434 | 0.035973  |
| TG(12:0_16:0_22:5) | 1.46809 | 0.180214021 | 0.000735  |
| TG(14:0_16:1_20:4) | 1.4665  | 0.218293187 | 0.000018  |
| TG(15:0_18:2_18:3) | 1.58248 | 0.339368633 | 0.001325  |
| TG(15:0_16:1_20:4) | 1.4555  | 0.239569997 | 0.001719  |
| TG(16:1_17:1_18:3) | 1.58562 | 0.308235607 | 0.00144   |
| TG(16:1_18:2_18:2) | 1.53088 | 0.323893284 | 0.000469  |
| TG(16:0_18:2_18:3) | 1.54184 | 0.270747425 | 0.000188  |
| TG(16:1_18:1_18:3) | 1.52945 | 0.258186552 | 0.000084  |
| TG(16:0_16:1_20:4) | 1.51197 | 0.156010838 | 0.000046  |
| TG(14:0_16:0_22:5) | 1.54625 | 0.171208603 | 0.000056  |
| TG(16:0_17:1_20:4) | 1.4694  | 0.180887663 | 0.001712  |
| TG(17:1_18:2_18:2) | 1.62847 | 0.365393102 | 0.000708  |
| TG(15:0_18:1_20:4) | 1.55918 | 0.376642145 | 0.00076   |
| TG(18:1_18:2_18:2) | 1.57481 | 0.39480199  | 0.00017   |
| TG(16:0_18:1_20:4) | 1.56786 | 0.179774596 | 0.000001  |
| TG(16:1_18:1_20:3) | 1.37971 | 0.196765102 | 0.000003  |
| TG(16:0_17:0_22:5) | 1.41413 | 0.171163972 | 0.000048  |
| TG(19:1_18:2_18:2) | 1.15501 | 0.323858148 | 0.000264  |
| TG(17:0_18:1_20:4) | 1.50982 | 0.183759212 | 0.00003   |
| TG(18:1_18:2_20:2) | 1.35729 | 0.330441778 | 0.000017  |
| TG(18:0_18:3_20:2) | 1.45681 | 0.307219802 | 0.000072  |
| TG(16:0_18:1_22:4) | 1.51974 | 0.08110571  | <0.000001 |
| TG(18:0_18:1_20:4) | 1.44894 | 0.213113847 | <0.000001 |
| TG(18:2_18:2_20:1) | 1.53507 | 0.385786928 | 0.000713  |
| TG(18:0_18:1_22:4) | 1.49397 | 0.083184749 | <0.000001 |
| TG(18:2_18:2_22:1) | 1.5643  | 0.40303532  | 0.00004   |
| TG(18:1_18:2_22:2) | 1.56007 | 0.342728078 | 0.000963  |
| TG(16:0_18:1_24:4) | 1.56458 | 0.117507351 | <0.000001 |
| TG(24:1_18:2_18:2) | 1.57222 | 0.561176099 | 0.018311  |
| TG(16:0_18:2_16:4) | 1.56217 | 0.308110424 | 0.00126   |
| TG(14:1_18:2_18:3) | 1.55145 | 0.369655089 | 0.021063  |
| TG(14:0_16:1_20:5) | 1.45859 | 0.176084593 | 0.001509  |



|                    |         |             |           |
|--------------------|---------|-------------|-----------|
| TG(12:0_16:0_22:6) | 1.37919 | 0.237255142 | 0.000574  |
| TG(16:0_16:1_20:5) | 1.25096 | 0.11481056  | 0.000498  |
| TG(16:1_18:2_18:3) | 1.47763 | 0.144878357 | 0.000061  |
| TG(16:0_18:2_18:4) | 1.45121 | 0.115862646 | 0.000124  |
| TG(17:1_18:2_18:3) | 1.59573 | 0.31749441  | 0.000106  |
| TG(18:1_18:2_18:3) | 1.44726 | 0.318290213 | 0.000103  |
| TG(16:0_18:2_20:4) | 1.50382 | 0.34229593  | <0.000001 |
| TG(16:0_16:1_22:5) | 1.55775 | 0.123453279 | 0.00013   |
| TG(16:0_16:0_22:6) | 1.53709 | 0.13681087  | <0.000001 |
| TG(17:1_18:1_20:4) | 1.50823 | 0.155293842 | 0.000011  |
| TG(16:0_17:0_22:6) | 1.43519 | 0.142991656 | 0.000007  |
| TG(16:0_18:1_22:5) | 1.50766 | 0.110400852 | 0.000012  |
| TG(18:0_18:2_20:4) | 1.4527  | 0.272424393 | 0.000023  |
| TG(16:0_18:0_22:6) | 1.55355 | 0.178285991 | 0.000005  |
| TG(18:2_18:2_20:2) | 1.18224 | 0.29639345  | 0.000111  |
| TG(18:1_18:1_22:4) | 1.30906 | 0.086987826 | <0.000001 |
| TG(18:0_18:0_22:6) | 1.43273 | 0.118636977 | 0.000003  |
| TG(18:0_18:1_22:5) | 1.38021 | 0.124172368 | 0.000001  |
| TG(18:1_18:1_24:4) | 1.41275 | 0.125455843 | 0.000002  |
| TG(14:0_18:3_20:4) | 1.53748 | 0.218366702 | 0.000742  |
| TG(16:1_16:1_20:5) | 1.37118 | 0.22358867  | 0.000391  |
| TG(16:2_18:2_18:3) | 1.4665  | 0.449209184 | 0.01476   |
| TG(15:0_16:1_22:6) | 1.45862 | 0.139691877 | 0.000028  |
| TG(18:2_18:2_18:3) | 1.48589 | 0.33996924  | 0.001099  |
| TG(16:0_18:2_20:5) | 1.31642 | 0.242514511 | 0.000143  |
| TG(16:0_16:1_22:6) | 1.25601 | 0.142072265 | 0.000018  |
| TG(18:1_18:2_18:4) | 1.24061 | 0.190100125 | 0.000172  |
| TG(15:0_18:1_22:6) | 1.14531 | 0.201784601 | 0.00001   |
| TG(18:1_18:2_20:4) | 1.48811 | 0.401912241 | 0.000044  |
| TG(16:0_18:1_22:6) | 1.4375  | 0.199694522 | 0.000002  |
| TG(16:1_16:1_24:5) | 1.53059 | 0.158017031 | 0.000003  |
| TG(17:0_18:1_22:6) | 1.36089 | 0.209086225 | 0.000002  |
| TG(18:0_18:1_22:6) | 1.27461 | 0.131043447 | 0.000001  |
| TG(18:1_18:2_22:4) | 1.45405 | 0.192663364 | 0.000002  |
| TG(16:0_20:2_22:5) | 1.51662 | 0.158084476 | 0.000004  |
| TG(19:0_18:1_22:6) | 1.55872 | 0.261117836 | 0.000118  |
| TG(14:1_16:1_22:6) | 1.19265 | 0.349312977 | 0.000683  |
| TG(18:2_18:3_18:3) | 1.39701 | 0.30269127  | 0.004415  |
| TG(16:1_16:1_22:6) | 1.43516 | 0.198673634 | 0.000075  |
| TG(16:0_18:2_22:6) | 1.17166 | 0.307141553 | 0.000148  |
| TG(16:1_18:1_22:6) | 1.12041 | 0.196188329 | <0.000001 |
| TG(16:1_16:1_24:6) | 1.31201 | 0.286191347 | 0.000162  |
| TG(18:1_18:2_22:5) | 1.12895 | 0.231634494 | 0.000003  |
| TG(18:2_18:2_22:4) | 1.26316 | 0.29951755  | 0.00021   |
| TG(17:1_17:1_24:6) | 1.52145 | 0.269581574 | 0.000028  |
| TG(18:1_20:1_22:6) | 1.50657 | 0.16044733  | 0.000152  |
| TG(18:1_20:3_22:4) | 1.14835 | 0.238592309 | 0.000004  |
| TG(18:2_18:3_18:4) | 1.03231 | 0.256379047 | 0.010195  |
| TG(16:1_18:2_22:6) | 1.29959 | 0.201723495 | 0.000237  |
| TG(18:1_18:2_22:6) | 1.24295 | 0.313018011 | 0.000345  |
| TG(18:2_22:5_22:6) | 1.44869 | 0.277193012 | 0.001851  |
| Carnitine C21:2    | 1.18766 | 4.806698822 | 0.00003   |
| Carnitine C18:3    | 1.01723 | 624.0925963 | 0.029717  |
| Carnitine C22:6    | 1.57159 | 2.362263577 | 0.004598  |

|                         |         |             |           |
|-------------------------|---------|-------------|-----------|
| PE(P-18:1_22:1)         | 1.43994 | 2.396601599 | 0.043854  |
| PE(P-20:0_20:3)         | 1.49636 | 0.103334624 | 0.000164  |
| PE(P-16:0_24:4)         | 1.45734 | 2.225841032 | 0.035579  |
| PE(P-18:1_24:4)         | 1.04042 | 2.185727704 | 0.007686  |
| PE(P-17:0_22:6)         | 1.25586 | 1.547841341 | 0.00362   |
| PE(P-18:1_22:5)         | 1.08246 | 1.729738267 | 0.005532  |
| PE(P-20:2_22:4)         | 1.40656 | 2.647597084 | 0.005788  |
| PE(P-20:1_22:6)         | 1.33547 | 0.686435519 | 0.015516  |
| DG(8:0_18:2)            | 1.35343 | 0.151440024 | 0.000045  |
| DG(18:2_18:4)           | 1.55128 | 0.510609431 | 0.015349  |
| Cer(t18:0/20:0(2OH))    | 1.62557 | 4.535464868 | 0.000131  |
| BMP(18:1_20:4)          | 1.06273 | 2.21731339  | 0.006583  |
| BMP(18:1_22:4)          | 1.25777 | 2.476244077 | 0.000074  |
| BMP(18:2_20:4)          | 1.60551 | 2.142600601 | 0.030187  |
| BMP(18:2_22:6)          | 1.35871 | 1.536203574 | 0.021233  |
| DG(O-16:0_20:1)         | 1.42086 | 1001.755975 | 0.001653  |
| TG(O-20:0_16:0_18:1)    | 1.4089  | 0.281718044 | 0.000167  |
| LPC(16:3)               | 1.07434 | 0.678565051 | 0.013178  |
| Cer(t20:2/38:2(2OH))    | 1.37009 | 0.137192229 | 0.000053  |
| Cer(t20:2/40:2(2OH))    | 1.49018 | 0.205242229 | 0.000043  |
| Cer(d22:0/21:1)         | 1.33416 | 0.44275539  | 0.025015  |
| Cer(d16:1/24:2)         | 1.46686 | 3.154306372 | 0.000448  |
| Cer(d17:1/16:0)         | 1.38241 | 1.759411928 | 0.000952  |
| Cer(d17:1/24:0)         | 1.51886 | 1.877097561 | 0.001958  |
| Cer(d17:1/24:1)         | 1.48379 | 1.780451646 | 0.000002  |
| Cer(d18:1/15:0)         | 1.44454 | 2.927249511 | 0.000294  |
| Cer(d18:1/22:2)         | 1.57062 | 2.286456808 | 0.000018  |
| Cer(d18:1/23:1)         | 1.288   | 1.73053758  | 0.00104   |
| Cer(d18:1/24:2)         | 1.14508 | 2.955936385 | <0.000001 |
| Cer(d18:1/26:2)         | 1.12563 | 2.282698711 | 0.007426  |
| Cer(d18:2/22:1)         | 1.39678 | 1.364196289 | 0.04082   |
| Cer(d18:2/24:2)         | 1.49359 | 2.823200792 | 0.000064  |
| Cer(d18:2/25:0)         | 1.30802 | 0.815249288 | 0.03207   |
| Cer(d19:1/16:0)         | 1.16976 | 1.869861601 | 0.008936  |
| Cer(d19:1/22:0)         | 1.15231 | 1.865376944 | 0.000386  |
| Cer(d19:1/23:0)         | 1.49939 | 1.583767939 | 0.027042  |
| Cer(d19:1/24:1)         | 1.39182 | 2.235388103 | 0.000104  |
| Cer(d20:1/22:1)         | 1.48683 | 2.416811284 | 0.025337  |
| Cer(d20:1/23:1)         | 1.3446  | 10.91719359 | 0.042178  |
| Cer(d20:1/25:0)         | 1.48382 | 0.589307874 | 0.030273  |
| HexCer(t15:0/16:2(2OH)) | 1.26317 | 0.446686193 | 0.013294  |
| HexCer(t17:2/34:2(2OH)) | 1.32958 | 0.548278062 | 0.046872  |
| HexCer(t17:2/40:1(2OH)) | 1.4463  | 0.157466507 | 0.000909  |
| HexCer(t17:2/42:1(2OH)) | 1.568   | 0.342737908 | 0.000053  |
| HexCer(t18:1/20:1(2OH)) | 1.44519 | 1.235883432 | 0.042953  |
| HexCer(t23:2/15:1(2OH)) | 1.46294 | 0.40246335  | 0.001043  |
| HexCer(d17:1/16:0)      | 1.54922 | 1.580932817 | 0.007728  |
| HexCer(d18:1/22:2)      | 1.48569 | 2.468664586 | 0.000004  |
| HexCer(d18:1/23:1)      | 1.52217 | 1.604846592 | 0.00145   |
| HexCer(d18:1/26:2)      | 1.54864 | 2.811440415 | 0.002002  |
| TG(12:0_18:1_22:6)      | 1.54869 | 0.14569022  | 0.000108  |
| TG(13:0_16:0_22:6)      | 1.18676 | 0.36767784  | 0.000138  |
| TG(13:0_18:1_22:6)      | 1.34207 | 0.19867344  | 0.00001   |
| TG(13:0_20:2_20:5)      | 1.57886 | 0.393870976 | 0.000707  |

|                    |         |             |           |
|--------------------|---------|-------------|-----------|
| TG(15:0_18:2_22:5) | 1.56037 | 0.231236605 | 0.000089  |
| TG(14:0_18:2_18:4) | 1.32805 | 0.180909537 | 0.002508  |
| TG(14:0_20:4_22:6) | 1.17931 | 0.191596294 | 0.00006   |
| TG(14:1_18:2_20:4) | 1.58022 | 0.407524791 | 0.000578  |
| TG(15:0_18:0_18:1) | 1.12984 | 0.188952218 | 0.000179  |
| TG(14:0_17:2_18:2) | 1.13318 | 0.503578668 | 0.014295  |
| TG(16:0_16:2_18:3) | 1.27169 | 0.23848451  | 0.002797  |
| TG(16:0_18:5_20:5) | 1.47712 | 0.150532731 | 0.012412  |
| TG(16:0_19:1_20:2) | 1.12275 | 0.109073547 | 0.000036  |
| TG(16:0_20:0_22:6) | 1.43114 | 0.126953607 | 0.000057  |
| TG(16:0_20:2_22:6) | 1.09446 | 0.231437307 | 0.000019  |
| TG(18:0_16:1_20:1) | 1.25495 | 0.196767335 | 0.000074  |
| TG(18:1_17:2_19:2) | 1.13709 | 0.353187341 | 0.004333  |
| TG(16:1_16:2_18:2) | 1.12387 | 0.282127283 | 0.001793  |
| TG(16:1_18:1_20:5) | 1.14236 | 0.114271601 | 0.000002  |
| TG(17:0_18:1_20:1) | 1.46103 | 0.130652013 | 0.000033  |
| TG(18:0_20:2_18:3) | 1.42312 | 0.191416531 | <0.000001 |
| TG(17:1_19:2_19:2) | 1.22701 | 0.183854158 | 0.000021  |
| TG(17:2_18:2_22:6) | 1.52993 | 0.326212325 | 0.005125  |
| TG(18:1_20:2_18:3) | 1.04967 | 0.192624384 | 0.000005  |
| TG(20:0_18:3_18:3) | 1.31609 | 0.264249459 | 0.000063  |
| TG(20:1_18:2_18:3) | 1.39841 | 0.275389944 | 0.00001   |
| TG(18:0_18:2_20:2) | 1.36925 | 0.192135503 | <0.000001 |
| TG(20:1_18:3_18:3) | 1.3859  | 0.241273728 | 0.000016  |
| TG(18:0_20:3_22:6) | 1.35891 | 0.158051387 | 0.003508  |
| TG(18:0_16:1_24:6) | 1.25008 | 0.147995087 | 0.000005  |
| TG(18:1_18:2_19:2) | 1.19448 | 0.207388379 | 0.00002   |
| TG(18:1_18:2_22:3) | 1.35145 | 0.107457933 | <0.000001 |
| TG(18:1_18:2_24:5) | 1.25858 | 0.235040002 | 0.000006  |

supplemental Table 4

|                    | Liver           |         |                |         | hippocampus     |         |                |         |
|--------------------|-----------------|---------|----------------|---------|-----------------|---------|----------------|---------|
|                    | immobility time |         | total distance |         | immobility time |         | total distance |         |
|                    | cor             | p value | cor            | p value | cor             | p value | cor            | p value |
| DG(16:0_20:1)      | 0.573           | 0.051   | -0.483         | 0.112   | 0.494           | 0.103   | -.606*         | 0.037   |
| DG(16:0_20:2)      | 0.562           | 0.057   | -0.466         | 0.127   | 0.385           | 0.216   | -0.291         | 0.359   |
| DG(18:0_20:3)      | .636*           | 0.026   | -0.406         | 0.191   | 0.553           | 0.062   | -0.501         | 0.097   |
| DG(18:0_20:4)      | 0.401           | 0.197   | -0.147         | 0.649   | 0.517           | 0.085   | -.580*         | 0.048   |
| DG(18:0_22:4)      | 0.182           | 0.572   | -0.469         | 0.124   | 0.483           | 0.112   | -0.441         | 0.152   |
| LPC(0:0/18:1)      | 0.533           | 0.074   | -0.448         | 0.145   | 0.524           | 0.08    | -.671*         | 0.017   |
| LPC(20:0/0:0)      | .639*           | 0.025   | -0.559         | 0.059   | 0.552           | 0.063   | -0.559         | 0.059   |
| LPC(20:1/0:0)      | 0.427           | 0.166   | -0.51          | 0.09    | 0.427           | 0.167   | -0.531         | 0.075   |
| PC(O-20:1_20:4)    | 0.259           | 0.416   | -0.517         | 0.085   | 0.245           | 0.443   | -.713**        | 0.009   |
| PE(O-18:0_16:0)    | 0.48            | 0.114   | -0.322         | 0.308   | 0.427           | 0.167   | -0.552         | 0.063   |
| PE(O-18:0_22:6)    | 0.435           | 0.158   | -0.406         | 0.191   | 0.483           | 0.112   | -0.538         | 0.071   |
| PE(O-20:0_18:1)    | 0.559           | 0.059   | -0.427         | 0.167   | 0.503           | 0.095   | -.608*         | 0.036   |
| PE(O-20:0_22:4)    | 0.483           | 0.111   | -.704*         | 0.011   | 0.343           | 0.276   | -0.357         | 0.255   |
| PE(O-20:2_22:6)    | .580*           | 0.048   | -0.434         | 0.159   | 0.448           | 0.145   | -.615*         | 0.033   |
| PE(P-20:0_20:3)    | 0.452           | 0.14    | -0.513         | 0.088   | 0.552           | 0.063   | -0.573         | 0.051   |
| PE(P-20:1_22:6)    | .613*           | 0.034   | -0.35          | 0.265   | 0.287           | 0.366   | -.748**        | 0.005   |
| PS(18:0_20:0)      | .625*           | 0.03    | -0.399         | 0.199   | 0.455           | 0.138   | -0.42          | 0.175   |
| TG(16:0_14:1_18:2) | .697*           | 0.012   | -0.417         | 0.178   | 0.343           | 0.276   | -.587*         | 0.045   |
| TG(16:0_16:1_22:6) | .732**          | 0.007   | -0.273         | 0.391   | 0.277           | 0.384   | -0.434         | 0.158   |
| TG(16:0_18:0_20:1) | .720**          | 0.008   | -0.427         | 0.167   | 0.378           | 0.225   | -0.077         | 0.812   |
| TG(16:0_18:2_18:3) | .820**          | 0.001   | -0.42          | 0.175   | -0.41           | 0.186   | -0.109         | 0.737   |
| TG(16:0_18:2_20:5) | .817**          | 0.001   | -0.301         | 0.342   | -0.154          | 0.633   | 0.448          | 0.145   |
| TG(16:1_16:1_18:1) | .657*           | 0.02    | -0.427         | 0.167   | 0.462           | 0.131   | -0.245         | 0.443   |
| TG(16:1_18:2_18:3) | .713**          | 0.009   | -0.538         | 0.071   | -.590*          | 0.044   | 0.53           | 0.076   |
| TG(17:0_18:1_18:1) | .713**          | 0.009   | -0.49          | 0.106   | -0.326          | 0.301   | 0.08           | 0.805   |
